# Supplementary material for: A Chimeric Oncolytic Adenovirus Carried by Macrophages for Glioma Immunotherapy
Source: Research Square preprint supplement (doi:10.21203/rs.3.rs-6291711/v1), 2025-04-01
Supplement: Supplementary file 1 [file 02d2269c2ce07fdad54c4daa.xlsx]

## Sheet: Sheet1
ONTOLOGY	ID	Description	GeneRatio	BgRatio	pValue	pAdjust	Count	upGeneID	downGeneID
BP	GO:0039530	MDA-5 signaling pathway	0.0052 (10/1936)	0.0008 (25/31285)	4.49699e-07	0.00567891	10	OAS2/OAS1/IRF9/IRF7/OAS3/IFIH1/IRF5/transcript:ENST00000533182/DHX58/IRF8
BP	GO:0034340	response to type I interferon	0.0108 (21/1936)	0.0036 (112/31285)	9.79979e-07	0.00567891	21	SMPDL3B/CH25H/MX2/transcript:ENST00000527170/transcript:ENST00000445387/transcript:ENST00000452281/ISG15/transcript:ENST00000557433/transcript:ENST00000534405/STAT1/transcript:ENST00000557348/transcript:ENST00000553837/transcript:ENST00000555563/MX1	transcript:ENST00000431180/transcript:ENST00000556825/transcript:ENST00000334884/SMPD1/transcript:ENST00000533123/transcript:ENST00000531303/KMT2C
BP	GO:0009615	response to virus	0.0455 (88/1936)	0.0296 (927/31285)	1.03391e-06	0.00567891	88	MX2/DDX3Y/OSCAR/ECM2/BTK/CCL8/FPR3/IRF8/TLR4/ATF3/IRF9/MERTK/CCL20/SMPDL3B/IFI35/transcript:ENST00000582022/IFITM1/LILRA6/ISG20/IFITM2/IFI44L/HCK/RSAD2/BATF2/LILRB4/LILRA5/TLR2/CXCR4/IL20RB/IFIT1/BST2/TNF/CCL3/CAMK1D/IFIT3/IRF5/PTGDS/IRAK3/DHX58/IFI6/OAS3/transcript:ENST00000533182/CCL7/RP11-1035H13.3/OAS2/KLHDC7B/LILRB2/transcript:ENST00000492414/IRF7/DDX60/CCNL1/gene:ENSG00000259753/IFIH1/trans…	PLXNA4/SMPD1/transcript:ENST00000496664/CCT2/transcript:ENST00000579877/transcript:ENST00000470121/RP1/ITK/transcript:ENST00000461221/transcript:ENST00000569365/transcript:ENST00000382240/transcript:ENST00000542343/transcript:ENST00000533123/EFCAB1/DCLK1/gene:ENSG00000256646/transcript:ENST00000555408/transcript:ENST00000531303/BCL2L2-PABPN1/transcript:ENST00000424699/transcript:ENST00000574723
MF	GO:0061750	acid sphingomyelin phosphodiesterase activity	0.0026 (5/1936)	0.0002 (6/31285)	3.15178e-06	0.0129838	5	SMPDL3B/transcript:ENST00000534405	transcript:ENST00000531303/SMPD1/transcript:ENST00000533123
BP	GO:0006565	L-serine catabolic process	0.0041 (8/1936)	0.0006 (19/31285)	4.15983e-06	0.0137091	8	transcript:ENST00000557348/CBS/transcript:ENST00000553837/SDS/transcript:ENST00000557433/CBSL/transcript:ENST00000555563	transcript:ENST00000556825
CC	GO:0030684	preribosome	0.0067 (13/1936)	0.0017 (54/31285)	6.59986e-06	0.0165078	13	RBM39/DDX47/transcript:ENST00000401730/IFIH1/DHX58/gene:ENSG00000255663/transcript:ENST00000602113	BCL2L2-PABPN1/transcript:ENST00000542140/transcript:ENST00000533164/transcript:ENST00000338163/transcript:ENST00000601065/transcript:ENST00000354291
BP	GO:0006563	L-serine metabolic process	0.0046 (9/1936)	0.0008 (26/31285)	7.01264e-06	0.0165078	9	transcript:ENST00000557348/CBS/transcript:ENST00000553837/SDS/PSAT1/transcript:ENST00000557433/CBSL/transcript:ENST00000555563	transcript:ENST00000556825
BP	GO:0006684	sphingomyelin metabolic process	0.0052 (10/1936)	0.0012 (36/31285)	1.98362e-05	0.0408575	10	SMPDL3B/ABCA5/ABCA10/SMPD3/transcript:ENST00000534405	transcript:ENST00000531303/transcript:ENST00000586995/SMPD1/transcript:ENST00000533123/transcript:ENST00000513998
BP	GO:0046479	glycosphingolipid catabolic process	0.0062 (12/1936)	0.0018 (56/31285)	5.18025e-05	0.0948447	12	transcript:ENST00000438133/SMPDL3B/NEU4/transcript:ENST00000491768/transcript:ENST00000534405/GALC	transcript:ENST00000531303/SMPD1/transcript:ENST00000447501/transcript:ENST00000533123/transcript:ENST00000448413/transcript:ENST00000513998
BP	GO:0060337	type I interferon-mediated signaling pathway	0.0119 (23/1936)	0.0055 (171/31285)	8.99784e-05	0.148266	23	TREX1/IRF7/transcript:ENST00000527170/IFIH1/IRF5/DHX58/IRAK3/IRF8/IFITM1/TREX2/transcript:ENST00000452281/IFI6/OAS3/IFI27/IFITM2/STAT1/transcript:ENST00000369973/transcript:ENST00000533182/OAS2/OAS1/IRF9/IL20RB/IFITM3
BP	GO:0032494	response to peptidoglycan	0.0088 (17/1936)	0.0035 (110/31285)	0.000132965	0.199181	17	transcript:ENST00000539881/CARD9/TLR2/IL6/TLR4/IRF9/IRF7/GPR1/IRF5/transcript:ENST00000369973/C5AR1/transcript:ENST00000533182/FPR3/IRAK3/IRF8/CMKLR1	transcript:ENST00000571451
BP	GO:0019450	L-cysteine catabolic process to pyruvate	0.0015 (3/1936)	0.0001 (3/31285)	0.000175946	0.223967	3	CBSL/CBS/CTH
BP	GO:0006685	sphingomyelin catabolic process	0.0036 (7/1936)	0.0007 (23/31285)	0.000190286	0.223967	7	SMPDL3B/SMPD3/transcript:ENST00000534405	transcript:ENST00000531303/SMPD1/transcript:ENST00000533123/transcript:ENST00000513998
MF	GO:0004767	sphingomyelin phosphodiesterase activity	0.0036 (7/1936)	0.0007 (23/31285)	0.000190286	0.223967	7	SMPDL3B/SMPD3/transcript:ENST00000534405	transcript:ENST00000531303/SMPD1/transcript:ENST00000533123/transcript:ENST00000513998
CC	GO:0042599	lamellar body	0.0062 (12/1936)	0.0021 (66/31285)	0.0002719	0.286449	12	SMPDL3B/ABCA5/ABCA10/transcript:ENST00000534405/transcript:ENST00000434055	transcript:ENST00000415891/transcript:ENST00000531303/transcript:ENST00000586995/SMPD1/CHODL/DCTN1/transcript:ENST00000533123
MF	GO:0004372	glycine hydroxymethyltransferase activity	0.0026 (5/1936)	0.0004 (12/31285)	0.000312906	0.286449	5	transcript:ENST00000557348/transcript:ENST00000553837/transcript:ENST00000557433/transcript:ENST00000555563	transcript:ENST00000556825
MF	GO:0008732	L-allo-threonine aldolase activity	0.0026 (5/1936)	0.0004 (12/31285)	0.000312906	0.286449	5	transcript:ENST00000557348/transcript:ENST00000553837/transcript:ENST00000557433/transcript:ENST00000555563	transcript:ENST00000556825
BP	GO:0019264	glycine biosynthetic process from serine	0.0026 (5/1936)	0.0004 (12/31285)	0.000312906	0.286449	5	transcript:ENST00000557348/transcript:ENST00000553837/transcript:ENST00000557433/transcript:ENST00000555563	transcript:ENST00000556825
BP	GO:0035456	response to interferon-beta	0.0057 (11/1936)	0.0019 (58/31285)	0.000330816	0.286905	11	transcript:ENST00000575369/transcript:ENST00000452281/BST2/transcript:ENST00000489775/IFITM2/transcript:ENST00000576724/PLSCR1/XAF1/IFITM3/STAT1/IFITM1
BP	GO:0002446	neutrophil mediated immunity	0.0098 (19/1936)	0.0046 (143/31285)	0.000415001	0.34192	19	IL6/LILRB2/MYO1G/MYO1F/CARD9/IRAK3/LILRA6/CD300C/transcript:ENST00000413704/transcript:ENST00000431285/transcript:ENST00000369973/LILRB4/WDFY4/LILRA5/MYO15B/PSTPIP1	CD300LB/transcript:ENST00000334884/transcript:ENST00000552309
BP	GO:0009113	purine nucleobase biosynthetic process	0.0036 (7/1936)	0.0008 (26/31285)	0.000440289	0.34548	7	transcript:ENST00000557348/transcript:ENST00000553837/transcript:ENST00000580356/transcript:ENST00000557433/transcript:ENST00000555563	transcript:ENST00000556825/transcript:ENST00000424203
BP	GO:0030727	germarium-derived female germ-line cyst formation	0.0036 (7/1936)	0.0009 (27/31285)	0.000565814	0.396789	7	SPTBN5/PSTPIP1/transcript:ENST00000512070/IFIH1/DHX58/transcript:ENST00000495564	gene:ENSG00000273167
MF	GO:0004123	cystathionine gamma-lyase activity	0.0021 (4/1936)	0.0003 (8/31285)	0.000574332	0.396789	4	CTH/CBSL/gene:ENSG00000272897/CBS
BP	GO:2000529	positive regulation of myeloid dendritic cell chemotaxis	0.0031 (6/1936)	0.0006 (20/31285)	0.000603524	0.396789	6	EHF/CCL20/CCL8/CCL7/CCL3	ELF5
BP	GO:0070106	interleukin-27-mediated signaling pathway	0.0046 (9/1936)	0.0014 (44/31285)	0.000638114	0.396789	9	OAS2/transcript:ENST00000452281/OAS1/MX2/OAS3/MX1/STAT1	PRLR/LEPR
MF	GO:0044540	L-cystine L-cysteine-lyase (deaminating)	0.0015 (3/1936)	0.0001 (4/31285)	0.000674237	0.396789	3	CBSL/CBS/CTH
BP	GO:0019343	cysteine biosynthetic process via cystathionine	0.0015 (3/1936)	0.0001 (4/31285)	0.000674237	0.396789	3	CBSL/CBS/CTH
BP	GO:0035395	negative regulation of chemokine (C-X-C motif) ligand 9 production	0.0015 (3/1936)	0.0001 (4/31285)	0.000674237	0.396789	3	OAS2/OAS3/OAS1
CC	GO:0071920	cleavage body	0.0041 (8/1936)	0.0012 (36/31285)	0.000709178	0.397709	8	transcript:ENST00000550704/transcript:ENST00000401730/gene:ENSG00000255663/transcript:ENST00000475126	BCL2L2-PABPN1/transcript:ENST00000552994/transcript:ENST00000601065/transcript:ENST00000542140
BP	GO:0032725	positive regulation of granulocyte macrophage colony-stimulating factor production	0.0114 (22/1936)	0.0059 (185/31285)	0.000724072	0.397709	22	EBI3/transcript:ENST00000483665/RASGRP3/LILRB2/LMO1/transcript:ENST00000558656/OSCAR/CARD9/IFIH1/DHX58/LILRA6/IL1RN/TLR4/FCGR1A/LILRB4/LILRA5/TLR2/transcript:ENST00000435201/IL1B	LRRTM4/transcript:ENST00000515800/FCGR2A
BP	GO:0045023	G0 to G1 transition	0.0067 (13/1936)	0.0027 (86/31285)	0.000977711	0.506044	13	CDKL3/CCNL1/transcript:ENST00000577831/transcript:ENST00000394606/CDK18/ERN1	transcript:ENST00000382240/transcript:ENST00000453535/transcript:ENST00000555408/CDKL5/transcript:ENST00000566631/transcript:ENST00000484049/CDK15
BP	GO:0006164	purine nucleotide biosynthetic process	0.0057 (11/1936)	0.0021 (66/31285)	0.00103534	0.506044	11	OAS2/transcript:ENST00000492129/OAS1/transcript:ENST00000580356/OAS3/transcript:ENST00000425141/transcript:ENST00000484496/transcript:ENST00000623287	SLC4A3/transcript:ENST00000424203/SLC4A4
BP	GO:0006544	glycine metabolic process	0.0041 (8/1936)	0.0012 (38/31285)	0.00103735	0.506044	8	PCK2/transcript:ENST00000557348/transcript:ENST00000553837/transcript:ENST00000557433/transcript:ENST00000555563	transcript:ENST00000556825/NDP/transcript:ENST00000424203
BP	GO:0048147	negative regulation of fibroblast proliferation	0.0201 (39/1936)	0.0132 (412/31285)	0.00104415	0.506044	39	TNF/RAP1GAP/CXCL3/transcript:ENST00000505433/transcript:ENST00000558084/MMP9/transcript:ENST00000534180/transcript:ENST00000498765/transcript:ENST00000445387/INHBA/MRC1/transcript:ENST00000558357/transcript:ENST00000601612/CD300C/PTPRO/MMP12/transcript:ENST00000488381/transcript:ENST00000413704/CXCL5/transcript:ENST00000522484/CXCL2/transcript:ENST00000394606/PARP9/transcript:ENST00000539881/MMP3…	CD300LB/transcript:ENST00000479896/SYNGAP1/transcript:ENST00000334884/transcript:ENST00000571451/transcript:ENST00000465045/transcript:ENST00000480814/KMT2C
BP	GO:0010954	positive regulation of protein processing	0.0129 (25/1936)	0.0073 (228/31285)	0.00108389	0.510297	25	ADAMTS14/TNFAIP6/ROS1/UNC5B/MMP9/transcript:ENST00000525130/transcript:ENST00000377092/BTK/CTNND2/transcript:ENST00000426248/MMP12/transcript:ENST00000483364/ADAMTS5/HCK/transcript:ENST00000421462/transcript:ENST00000529473/MMP3/SLA/NLRC4/THSD7A/transcript:ENST00000525370	ITK/transcript:ENST00000526491/SBSPON/transcript:ENST00000468065
BP	GO:0018023	peptidyl-lysine trimethylation	0.0052 (10/1936)	0.0019 (58/31285)	0.00132359	0.554428	10	transcript:ENST00000534187/transcript:ENST00000524893/transcript:ENST00000528685/transcript:ENST00000445387/FAM86B1	transcript:ENST00000431180/transcript:ENST00000334884/KMT2C/transcript:ENST00000530385/transcript:ENST00000340537
BP	GO:0043407	negative regulation of MAP kinase activity	0.0196 (38/1936)	0.0129 (404/31285)	0.00134733	0.554428	38	RASGRP3/VDR/SMPDL3B/SSH3/BTK/INPP5J/transcript:ENST00000498765/INHBA/IRAK3/IL1RN/CD300C/PTPRO/GDF15/BMP6/HCK/transcript:ENST00000534405/transcript:ENST00000395594/DUSP1/SLA/INHBE/transcript:ENST00000593532/C1QA/C1QB/transcript:ENST00000556575/C1QC/IL1B	transcript:ENST00000515853/CD300LB/ITK/transcript:ENST00000479896/transcript:ENST00000532881/SYNGAP1/SMPD1/RP11-47I22.4/transcript:ENST00000533123/RGS17/RGS4/transcript:ENST00000531303
MF	GO:0005319	lipid transporter activity	0.0098 (19/1936)	0.0051 (158/31285)	0.0014132	0.554428	19	ATP11A/APOL1/ABCA10/transcript:ENST00000375290/KCP/CD36/transcript:ENST00000397289/SLCO1B3/SLCO2B1/ATP8B3/ABCA5/MTTP/APOL3	PTCH1/transcript:ENST00000432700/transcript:ENST00000586995/CHODL/transcript:ENST00000422426/ATP8A1
BP	GO:0006968	cellular defense response	0.0238 (46/1936)	0.0165 (517/31285)	0.00143617	0.554428	46	TYROBP/CD163/LILRB2/transcript:ENST00000588198/IL1RL1/CXCL3/MNDA/HLA-F/CCL3/OSCAR/NCF4/PNLIPRP3/CCR5/gene:ENSG00000259753/BTK/CCL8/FPR3/HLA-C/transcript:ENST00000587251/LILRA6/IL18R1/CD300C/GPR35/CLEC12A/ATF3/CXCL5/HCK/CXCL2/transcript:ENST00000325960/transcript:ENST00000495564/LILRB4/CMKLR1/transcript:ENST00000536606/LILRA5/transcript:ENST00000610164/GPR1/NCF1/CXCR4/PSTPIP1/C5AR1	CD300LB/RP1/ITK/transcript:ENST00000561139/ADORA2A/CD6
MF	GO:0005125	cytokine activity	0.0232 (45/1936)	0.0161 (503/31285)	0.00144241	0.554428	45	EBI3/MINOS1-NBL1/CSF2/IL6/TNF/CSF3/TNFAIP6/CDIP1/C1R/CXCL3/CCL3/OSCAR/IL24/TNFSF8/PGF/INHBA/CCL8/IL12A/IL1RN/transcript:ENST00000483364/GDF15/BMP6/CXCL5/transcript:ENST00000443875/CXCL2/CCL7/IL11/NTNG2/LILRB4/IL36B/INHBE/IL1A/C1QA/CXCL8/C1QB/C1QC/IL1B/CCL20	CSMD3/NDP/PRLR/LEPR/CNTF/transcript:ENST00000520626/transcript:ENST00000581864
BP	GO:0042102	positive regulation of T cell proliferation	0.0263 (51/1936)	0.0188 (589/31285)	0.00147995	0.554428	51	EBI3/CD163/IL6/LILRB2/transcript:ENST00000588198/HES1/HLA-F/HEY1/OSCAR/CCL3/SLC7A11/CCR5/SIGLEC1/transcript:ENST00000616321/CCL8/IL12A/transcript:ENST00000587251/LILRA6/IL1RN/transcript:ENST00000452281/PTPRO/CLEC12A/CD4/transcript:ENST00000425141/STAT1/CCL7/SLC7A7/transcript:ENST00000495564/LILRB4/LILRA5/SPTBN5/SAMSN1/SELENOK/CXCR4/transcript:ENST00000512070/IL1B/CCL20/CD86	transcript:ENST00000515800/CSMD3/SLC4A4/transcript:ENST00000561139/transcript:ENST00000479896/NOSTRIN/transcript:ENST00000560014/PRLR/LEPR/CD6/transcript:ENST00000488746/ITGA10/SLC4A3
MF	GO:0008901	ferredoxin hydrogenase activity	0.0021 (4/1936)	0.0003 (10/31285)	0.00157352	0.554428	4	transcript:ENST00000581795/transcript:ENST00000374611/transcript:ENST00000565425	transcript:ENST00000582907
BP	GO:0006534	cysteine metabolic process	0.0021 (4/1936)	0.0003 (10/31285)	0.00157352	0.554428	4	CBSL/CBS/CTH/MOCOS
MF	GO:0004124	cysteine synthase activity	0.0015 (3/1936)	0.0002 (5/31285)	0.00161504	0.554428	3	CBSL/CBS/CTH
MF	GO:0071567	deUFMylase activity	0.0015 (3/1936)	0.0002 (5/31285)	0.00161504	0.554428	3	UFSP2	transcript:ENST00000510755/transcript:ENST00000514247
MF	GO:0061731	ribonucleoside-diphosphate reductase activity	0.0015 (3/1936)	0.0002 (5/31285)	0.00161504	0.554428	3	RRM1	transcript:ENST00000532170/transcript:ENST00000533349
MF	GO:0080146	L-cysteine desulfhydrase activity	0.0015 (3/1936)	0.0002 (5/31285)	0.00161504	0.554428	3	CBSL/CBS/CTH
BP	GO:1903487	regulation of lactation	0.0015 (3/1936)	0.0002 (5/31285)	0.00161504	0.554428	3	OAS2/OAS3/OAS1
CC	GO:0070721	ISGF3 complex	0.0036 (7/1936)	0.0010 (32/31285)	0.00167752	0.564125	7	transcript:ENST00000452281/IRF9/IRF7/IRF5/STAT1/transcript:ENST00000533182/IRF8
CC	GO:0032009	early phagosome	0.0181 (35/1936)	0.0118 (369/31285)	0.00176896	0.578802	35	SNX10/RASGRP3/CES3/MYO1G/RP11-295K3.1/MYO1F/CES1/RP11-468E2.1/ECM2/SYTL1/ADAP2/SYT7/ATP6V0D2/transcript:ENST00000558161/TLR4/PLA2G4B/CD36/ADAP1/transcript:ENST00000560451/TLR2/MYO15B/transcript:ENST00000545307/UNC13D/transcript:ENST00000561852/transcript:ENST00000529332	LRRTM4/transcript:ENST00000515800/SYTL5/transcript:ENST00000561419/SLC9A7/transcript:ENST00000436958/transcript:ENST00000368979/transcript:ENST00000420627/SYTL2/JMJD7-PLA2G4B
BP	GO:0002320	lymphoid progenitor cell differentiation	0.0062 (12/1936)	0.0026 (81/31285)	0.00180248	0.578802	12	TREX2/INHBE/FLT1/EHF/TREX1/GDF15/BMP6/INHBA/BATF2	BCL2L2-PABPN1/ELF5/transcript:ENST00000504875
BP	GO:0007291	sperm individualization	0.0124 (24/1936)	0.0072 (224/31285)	0.00184316	0.578802	24	NR1I3/VDR/MX2/transcript:ENST00000494339/PSMD13/transcript:ENST00000421674/MBOAT7/transcript:ENST00000615986/WDR78/ACTG2/transcript:ENST00000593532/transcript:ENST00000438141/PSTPIP1/transcript:ENST00000545307/EPB41L3/transcript:ENST00000554402/MX1/transcript:ENST00000585841	CSRP3/transcript:ENST00000480174/DYNC1I1/transcript:ENST00000572105/transcript:ENST00000617103/transcript:ENST00000425660
BP	GO:0009069	serine family amino acid metabolic process	0.0026 (5/1936)	0.0005 (17/31285)	0.00193192	0.578802	5	PCK2/transcript:ENST00000553837/SDS/transcript:ENST00000557433	NDP
MF	GO:0046404	ATP-dependent polydeoxyribonucleotide 5'-hydroxyl-kinase activity	0.0026 (5/1936)	0.0005 (17/31285)	0.00193192	0.578802	5	transcript:ENST00000593946/transcript:ENST00000465003/transcript:ENST00000483148/N4BP2	transcript:ENST00000511480
BP	GO:0043418	homocysteine catabolic process	0.0026 (5/1936)	0.0005 (17/31285)	0.00193192	0.578802	5	transcript:ENST00000511461/CBS/CTH/CBSL/transcript:ENST00000513439
BP	GO:0071888	macrophage apoptotic process	0.0036 (7/1936)	0.0011 (33/31285)	0.00202739	0.586094	7	CTSZ/IRF9/IRF7/IRF5/transcript:ENST00000533182/IRF8/CTSH
BP	GO:0016072	rRNA metabolic process	0.0036 (7/1936)	0.0011 (33/31285)	0.00202739	0.586094	7	transcript:ENST00000550704/RBM39/transcript:ENST00000502762/transcript:ENST00000514671	BCL2L2-PABPN1/transcript:ENST00000338163/transcript:ENST00000630114
CC	GO:0061830	concave side of sperm head	0.0021 (4/1936)	0.0004 (11/31285)	0.00236332	0.60677	4		transcript:ENST00000533164/transcript:ENST00000484566/transcript:ENST00000414983/transcript:ENST00000420201
BP	GO:0140236	translation at presynapse	0.0072 (14/1936)	0.0034 (106/31285)	0.00240119	0.60677	14	transcript:ENST00000534599/transcript:ENST00000572008/ISG15/transcript:ENST00000465407/transcript:ENST00000549098/transcript:ENST00000549370/RP11-1035H13.3/transcript:ENST00000547173	transcript:ENST00000529920/RPL36A-HNRNPH2/transcript:ENST00000547475/gene:ENSG00000263809/transcript:ENST00000574723/transcript:ENST00000569365
BP	GO:0002314	germinal center B cell differentiation	0.0062 (12/1936)	0.0027 (84/31285)	0.00246875	0.60677	12	EHF/IL6/IRF9/IRF7/IRF5/transcript:ENST00000533182/IRF8	transcript:ENST00000441123/ELF5/transcript:ENST00000468435/transcript:ENST00000536532/CDH18
MF	GO:0030170	pyridoxal phosphate binding	0.0077 (15/1936)	0.0038 (118/31285)	0.002505	0.60677	15	GAD1/transcript:ENST00000557348/CBS/gene:ENSG00000272897/transcript:ENST00000553837/SDS/PSAT1/transcript:ENST00000557433/CTH/CBSL/transcript:ENST00000555563/MOCOS/transcript:ENST00000583245	transcript:ENST00000556825/transcript:ENST00000493875
BP	GO:0034127	regulation of MyD88-independent toll-like receptor signaling pathway	0.0026 (5/1936)	0.0006 (18/31285)	0.00255248	0.60677	5	IRF9/IRF7/IRF5/transcript:ENST00000533182/IRF8
MF	GO:0008311	double-stranded DNA 3'-5' DNA exonuclease activity	0.0026 (5/1936)	0.0006 (18/31285)	0.00255248	0.60677	5	TREX2/TREX1/transcript:ENST00000513914	transcript:ENST00000325577/RAD9B
BP	GO:0001754	eye photoreceptor cell differentiation	0.0057 (11/1936)	0.0024 (74/31285)	0.00267794	0.60677	11	transcript:ENST00000452281/WDR78/STAT1/transcript:ENST00000487078/transcript:ENST00000434055	transcript:ENST00000415891/PPP2R3C/DYNC1I1/transcript:ENST00000549394/DCTN1/AGBL5
BP	GO:0071726	cellular response to diacyl bacterial lipopeptide	0.0031 (6/1936)	0.0008 (26/31285)	0.00268501	0.60677	6	IL18R1/TLR2/TLR4/CD36/CD14/IL1RL1
CC	GO:0009509	chromoplast	0.0015 (3/1936)	0.0002 (6/31285)	0.00309526	0.60677	3	CBSL/CBS/IL4I1
BP	GO:0001808	negative regulation of type IV hypersensitivity	0.0015 (3/1936)	0.0002 (6/31285)	0.00309526	0.60677	3	IL20RB/transcript:ENST00000469964/transcript:ENST00000475972
BP	GO:0044087	regulation of cellular component biogenesis	0.0015 (3/1936)	0.0002 (6/31285)	0.00309526	0.60677	3	transcript:ENST00000468323	transcript:ENST00000498169/transcript:ENST00000460404
MF	GO:0001730	2'-5'-oligoadenylate synthetase activity	0.0015 (3/1936)	0.0002 (6/31285)	0.00309526	0.60677	3	OAS2/OAS3/OAS1
BP	GO:0080057	sepal vascular tissue pattern formation	0.0015 (3/1936)	0.0002 (6/31285)	0.00309526	0.60677	3	transcript:ENST00000514671/transcript:ENST00000502762	transcript:ENST00000630114
BP	GO:0080056	petal vascular tissue pattern formation	0.0015 (3/1936)	0.0002 (6/31285)	0.00309526	0.60677	3	transcript:ENST00000514671/transcript:ENST00000502762	transcript:ENST00000630114
BP	GO:0080145	intracellular cysteine homeostasis	0.0010 (2/1936)	0.0001 (2/31285)	0.00314162	0.60677	2	CBSL/CBS
MF	GO:0050272	S-carboxymethylcysteine synthase activity	0.0010 (2/1936)	0.0001 (2/31285)	0.00314162	0.60677	2	CBSL/CBS
BP	GO:0019345	cysteine biosynthetic process via S-sulfo-L-cysteine	0.0010 (2/1936)	0.0001 (2/31285)	0.00314162	0.60677	2	CBSL/CBS
BP	GO:0097164	ammonium ion metabolic process	0.0010 (2/1936)	0.0001 (2/31285)	0.00314162	0.60677	2	transcript:ENST00000454046/ASNS
MF	GO:0032558	adenyl deoxyribonucleotide binding	0.0010 (2/1936)	0.0001 (2/31285)	0.00314162	0.60677	2	TREX2/TREX1
BP	GO:0009836	fruit ripening, climacteric	0.0010 (2/1936)	0.0001 (2/31285)	0.00314162	0.60677	2	CBSL/CBS
MF	GO:0050234	pyrazolylalanine synthase activity	0.0010 (2/1936)	0.0001 (2/31285)	0.00314162	0.60677	2	CBSL/CBS
MF	GO:0004071	aspartate-ammonia ligase activity	0.0010 (2/1936)	0.0001 (2/31285)	0.00314162	0.60677	2	transcript:ENST00000454046/ASNS
MF	GO:0047458	beta-pyrazolylalanine synthase activity	0.0010 (2/1936)	0.0001 (2/31285)	0.00314162	0.60677	2	CBSL/CBS
MF	GO:0050461	L-mimosine synthase activity	0.0010 (2/1936)	0.0001 (2/31285)	0.00314162	0.60677	2	CBSL/CBS
CC	GO:0009333	cysteine synthase complex	0.0010 (2/1936)	0.0001 (2/31285)	0.00314162	0.60677	2	CBSL/CBS
BP	GO:0097281	immune complex formation	0.0010 (2/1936)	0.0001 (2/31285)	0.00314162	0.60677	2	TREX2/TREX1
MF	GO:0005149	interleukin-1 receptor binding	0.0067 (13/1936)	0.0031 (98/31285)	0.00324835	0.60677	13	IL18R1/IL1RN/IL1A/IL36B/TLR2/TLR4/IL1RL1/transcript:ENST00000369973/IL1B/IRAK3	transcript:ENST00000552309/TICAM2/LRRTM4
BP	GO:1903076	regulation of protein localization to plasma membrane	0.0181 (35/1936)	0.0122 (383/31285)	0.00325911	0.60677	35	CDKL3/VDR/ZDHHC11/TRIB3/transcript:ENST00000636866/MMP9/CAMK1D/FAM43A/ERN1/MMP12/GBP5/MMP3/transcript:ENST00000585841/GBP4/SPTBN5/transcript:ENST00000593532/transcript:ENST00000504325/transcript:ENST00000511473/CDK18	CSRP3/CDK15/transcript:ENST00000478793/transcript:ENST00000568422/transcript:ENST00000566631/transcript:ENST00000426902/transcript:ENST00000572105/transcript:ENST00000420627/transcript:ENST00000555408/DCLK1/transcript:ENST00000510106/transcript:ENST00000637871/CDKL5/transcript:ENST00000530122/transcript:ENST00000503494/transcript:ENST00000425660
MF	GO:0017076	purine nucleotide binding	0.0031 (6/1936)	0.0009 (27/31285)	0.0032905	0.60677	6	transcript:ENST00000465003/transcript:ENST00000593946/RRM1/transcript:ENST00000483148	transcript:ENST00000533349/transcript:ENST00000532170
BP	GO:1900102	negative regulation of endoplasmic reticulum unfolded protein response	0.0031 (6/1936)	0.0009 (27/31285)	0.0032905	0.60677	6	PPM1D/transcript:ENST00000504325/transcript:ENST00000511473	transcript:ENST00000552635/transcript:ENST00000503494/transcript:ENST00000392995
CC	GO:0070552	BRISC complex	0.0031 (6/1936)	0.0009 (27/31285)	0.0032905	0.60677	6	transcript:ENST00000557348/transcript:ENST00000553837/transcript:ENST00000557433/transcript:ENST00000475656/transcript:ENST00000555563	transcript:ENST00000556825
CC	GO:0000112	nucleotide-excision repair factor 3 complex	0.0026 (5/1936)	0.0006 (19/31285)	0.00330572	0.60677	5	BIVM-ERCC5/transcript:ENST00000482936	ERCC5/RTEL1/transcript:ENST00000543415
MF	GO:0097472	cyclin-dependent protein kinase activity	0.0057 (11/1936)	0.0024 (76/31285)	0.00331407	0.60677	11	transcript:ENST00000409403/CDKL3/CDK18/ERN1	transcript:ENST00000382240/transcript:ENST00000453535/transcript:ENST00000555408/CDKL5/transcript:ENST00000510106/transcript:ENST00000566631/CDK15
BP	GO:0070951	regulation of neutrophil mediated killing of gram-negative bacterium	0.0021 (4/1936)	0.0004 (12/31285)	0.00338853	0.612783	4	CXCL8/CXCL5/CXCL3/CXCL2
CC	GO:0070516	CAK-ERCC2 complex	0.0036 (7/1936)	0.0012 (36/31285)	0.00342129	0.612783	7	CDKL3/transcript:ENST00000482936	transcript:ENST00000453535/CDKL5/transcript:ENST00000510106/RTEL1/transcript:ENST00000484049
BP	GO:0090304	nucleic acid metabolic process	0.0067 (13/1936)	0.0032 (99/31285)	0.00355175	0.625688	13	transcript:ENST00000480240/ERN1/transcript:ENST00000482936/transcript:ENST00000445387/DDX60/transcript:ENST00000547173	transcript:ENST00000533482/transcript:ENST00000425046/transcript:ENST00000413809/RNASEH1/transcript:ENST00000547475/RTEL1/transcript:ENST00000513998
CC	GO:0001651	dense fibrillar component	0.0062 (12/1936)	0.0028 (88/31285)	0.00365566	0.625688	12	transcript:ENST00000550704/NR1I3/VDR/transcript:ENST00000593532/transcript:ENST00000502762/RBM39/gene:ENSG00000255663/transcript:ENST00000514671	BCL2L2-PABPN1/transcript:ENST00000542140/transcript:ENST00000338163/transcript:ENST00000630114
BP	GO:0140242	translation at postsynapse	0.0072 (14/1936)	0.0035 (111/31285)	0.00368635	0.625688	14	transcript:ENST00000534599/transcript:ENST00000572008/ISG15/transcript:ENST00000465407/transcript:ENST00000549098/transcript:ENST00000549370/RP11-1035H13.3/transcript:ENST00000547173	transcript:ENST00000529920/RPL36A-HNRNPH2/transcript:ENST00000547475/gene:ENSG00000263809/transcript:ENST00000574723/transcript:ENST00000569365
BP	GO:0016226	iron-sulfur cluster assembly	0.0088 (17/1936)	0.0047 (147/31285)	0.00369282	0.625688	17	transcript:ENST00000374611/transcript:ENST00000559705/gene:ENSG00000272897/CBS/transcript:ENST00000361660/CBSL/transcript:ENST00000512970/transcript:ENST00000513439/transcript:ENST00000581795/transcript:ENST00000616321/BOLA2/transcript:ENST00000565425	transcript:ENST00000539560/transcript:ENST00000441194/transcript:ENST00000582907/transcript:ENST00000450178/transcript:ENST00000504902
BP	GO:0070925	organelle assembly	0.0041 (8/1936)	0.0015 (46/31285)	0.00372117	0.625688	8	transcript:ENST00000431601/TDRD6/ABCA5/ABCA10/transcript:ENST00000442798	transcript:ENST00000586995/transcript:ENST00000452389/transcript:ENST00000530122
BP	GO:0071659	negative regulation of IP-10 production	0.0041 (8/1936)	0.0015 (46/31285)	0.00372117	0.625688	8	OAS2/LILRA5/OAS1/LILRB2/LILRA6/OAS3/LILRB4/OSCAR
BP	GO:0060339	negative regulation of type I interferon-mediated signaling pathway	0.0108 (21/1936)	0.0063 (198/31285)	0.00386007	0.642488	21	TREX1/transcript:ENST00000492414/transcript:ENST00000522644/MMP9/TREX2/USP18/transcript:ENST00000452281/PTPRO/MMP12/ISG15/OAS3/STAT1/transcript:ENST00000539881/MMP3/OAS2/OAS1/transcript:ENST00000438141	transcript:ENST00000479896/transcript:ENST00000571451/transcript:ENST00000496664/transcript:ENST00000398654
BP	GO:0009236	cobalamin biosynthetic process	0.0031 (6/1936)	0.0009 (28/31285)	0.00399204	0.649223	6	transcript:ENST00000456188/transcript:ENST00000621474/CBWD5/transcript:ENST00000465014/transcript:ENST00000612045	transcript:ENST00000612050
BP	GO:0045071	negative regulation of viral genome replication	0.0170 (33/1936)	0.0115 (360/31285)	0.0039946	0.649223	33	IFIT1/MX2/BST2/TNF/transcript:ENST00000492414/TRPA1/MNDA/transcript:ENST00000407982/CCL3/transcript:ENST00000489775/PI3/IFIT3/IFIH1/PTGDS/CCL8/DHX58/IFITM1/transcript:ENST00000409403/ISG20/ISG15/HELZ2/OAS3/IFITM2/RSAD2/CCL7/OAS2/OAS1/PLSCR1/IFITM3/MX1	transcript:ENST00000335760/transcript:ENST00000496664/transcript:ENST00000382240
BP	GO:0002826	negative regulation of T-helper 1 type immune response	0.0036 (7/1936)	0.0012 (37/31285)	0.00401874	0.649223	7	IL18R1/TLR2/CCL20/IL1RL1/CCL8/CCL7/CCL3
BP	GO:0051103	DNA ligation involved in DNA repair	0.0026 (5/1936)	0.0006 (20/31285)	0.00420646	0.663503	5	transcript:ENST00000465003/transcript:ENST00000593946/transcript:ENST00000601091/transcript:ENST00000483148/transcript:ENST00000594759
BP	GO:0034124	regulation of MyD88-dependent toll-like receptor signaling pathway	0.0026 (5/1936)	0.0006 (20/31285)	0.00420646	0.663503	5	IRF9/IRF7/IRF5/transcript:ENST00000533182/IRF8
BP	GO:0032753	positive regulation of interleukin-4 production	0.0155 (30/1936)	0.0102 (320/31285)	0.00426102	0.663503	30	FCER1G/NR1I3/RASGRP3/VDR/IRF7/CEBPD/IL1RL1/SLC7A5/HLA-F/ULBP1/SLC7A11/IRF5/HLA-C/IRF8/NR4A1/IL18R1/transcript:ENST00000475972/transcript:ENST00000533182/SLC7A7/transcript:ENST00000539881/C8orf44-SGK3/LGALS9/IRF9/SAMSN1/IL20RB/transcript:ENST00000469964/CD86	transcript:ENST00000515800/RP11-47I22.4/transcript:ENST00000571451
BP	GO:1901857	positive regulation of cellular respiration	0.0041 (8/1936)	0.0015 (47/31285)	0.00426819	0.663503	8	OAS2/OAS1/transcript:ENST00000357390/transcript:ENST00000610164/OAS3/IL20RB/transcript:ENST00000504594/transcript:ENST00000394606
BP	GO:0006401	RNA catabolic process	0.0114 (22/1936)	0.0068 (213/31285)	0.00434092	0.668502	22	DDX47/DDX60/RBMS3/IFIH1/DHX58/ISG20/HELZ2/OAS3/EXOSC6/RBM39/gene:ENSG00000255663/OAS2/OAS1/transcript:ENST00000502762/transcript:ENST00000514671	RNASEH1/transcript:ENST00000630114/transcript:ENST00000354291/transcript:ENST00000542140/transcript:ENST00000465229/transcript:ENST00000484566/transcript:ENST00000338163
BP	GO:0006308	DNA catabolic process	0.0052 (10/1936)	0.0022 (68/31285)	0.00444758	0.678586	10	TREX2/TREX1/ISG20/transcript:ENST00000523214/transcript:ENST00000524647/transcript:ENST00000445387/DFFB	transcript:ENST00000425046/transcript:ENST00000491998/transcript:ENST00000413809
BP	GO:0001542	ovulation from ovarian follicle	0.0088 (17/1936)	0.0048 (150/31285)	0.00454052	0.68641	17	EBI3/ADAMTS14/OAS2/MMP9/OAS1/MMP12/ADAMTS5/PLA2G4B/OAS3/ESR1/UNC5B/MRC1/MMP3	JMJD7-PLA2G4B/LEPR/PDE11A/PDE3A
MF	GO:0048248	CXCR3 chemokine receptor binding	0.0021 (4/1936)	0.0004 (13/31285)	0.00467898	0.693568	4	CXCL8/CXCL5/CXCL3/CXCL2
BP	GO:2000548	negative regulation of dendritic cell dendrite assembly	0.0021 (4/1936)	0.0004 (13/31285)	0.00467898	0.693568	4	CCL8/CCL7/CCL20/CCL3
BP	GO:0032365	intracellular lipid transport	0.0031 (6/1936)	0.0009 (29/31285)	0.00479832	0.693568	6	transcript:ENST00000375290/FABP4/transcript:ENST00000299596/transcript:ENST00000524543	TMEM41B/PTCH1
BP	GO:0009143	nucleoside triphosphate catabolic process	0.0031 (6/1936)	0.0009 (29/31285)	0.00479832	0.693568	6	SMPDL3B/ENTPD1/transcript:ENST00000534405	SMPD1/transcript:ENST00000533123/transcript:ENST00000513998
BP	GO:2000866	positive regulation of estradiol secretion	0.0031 (6/1936)	0.0009 (29/31285)	0.00479832	0.693568	6	IL1RN/IL6/transcript:ENST00000357390/TNF/CGB1/IL1B
BP	GO:0042157	lipoprotein metabolic process	0.0088 (17/1936)	0.0048 (151/31285)	0.00485619	0.695829	17	transcript:ENST00000538239/VDR/ABCA5/transcript:ENST00000593532/ABCA10/CLEC12A/APOL3/transcript:ENST00000397289/transcript:ENST00000375290/MTTP/APOL1	transcript:ENST00000422426/transcript:ENST00000432700/transcript:ENST00000335760/transcript:ENST00000586995/PTCH1/transcript:ENST00000534843
MF	GO:0004590	orotidine-5'-phosphate decarboxylase activity	0.0015 (3/1936)	0.0002 (7/31285)	0.0051913	0.711713	3	transcript:ENST00000462091/transcript:ENST00000479719	transcript:ENST00000467167
BP	GO:0046704	CDP metabolic process	0.0015 (3/1936)	0.0002 (7/31285)	0.0051913	0.711713	3	RRM1	transcript:ENST00000532170/transcript:ENST00000533349
MF	GO:0004588	orotate phosphoribosyltransferase activity	0.0015 (3/1936)	0.0002 (7/31285)	0.0051913	0.711713	3	transcript:ENST00000462091/transcript:ENST00000479719	transcript:ENST00000467167
MF	GO:0120147	formylglycine-generating oxidase activity	0.0015 (3/1936)	0.0002 (7/31285)	0.0051913	0.711713	3	transcript:ENST00000438133	transcript:ENST00000448413/transcript:ENST00000447501
BP	GO:0006213	pyrimidine nucleoside metabolic process	0.0015 (3/1936)	0.0002 (7/31285)	0.0051913	0.711713	3	TYMP/NT5C3A	transcript:ENST00000456458
MF	GO:0008821	crossover junction DNA endonuclease activity	0.0026 (5/1936)	0.0007 (21/31285)	0.00526939	0.711713	5	BIVM-ERCC5/transcript:ENST00000475762/transcript:ENST00000524647/transcript:ENST00000482007	ERCC5
BP	GO:1903461	Okazaki fragment processing involved in mitotic DNA replication	0.0026 (5/1936)	0.0007 (21/31285)	0.00526939	0.711713	5	transcript:ENST00000601091/HELZ2/IFIH1/transcript:ENST00000594759/DHX58
MF	GO:0004527	exonuclease activity	0.0067 (13/1936)	0.0033 (104/31285)	0.00543169	0.721802	13	BIVM-ERCC5/ISG20/transcript:ENST00000555178/transcript:ENST00000554976/HELZ2/EXOSC6/transcript:ENST00000631044	ERCC5/MAP2K3/transcript:ENST00000465229/transcript:ENST00000438329/gene:ENSG00000100101/transcript:ENST00000513998
MF	GO:0070891	lipoteichoic acid binding	0.0067 (13/1936)	0.0033 (104/31285)	0.00543169	0.721802	13	TLR2/CD300C/CD163/TLR4/transcript:ENST00000588198/TNFAIP6/CD14/transcript:ENST00000443875/transcript:ENST00000539881/transcript:ENST00000587251	CD6/transcript:ENST00000571451/CSMD3
BP	GO:0042494	detection of bacterial lipoprotein	0.0031 (6/1936)	0.0010 (30/31285)	0.0057181	0.735588	6	TLR2/CD163/TLR4/transcript:ENST00000588198/transcript:ENST00000587251	CD6
MF	GO:0042054	histone methyltransferase activity	0.0108 (21/1936)	0.0066 (205/31285)	0.00575281	0.735588	21	transcript:ENST00000524893/transcript:ENST00000534320/transcript:ENST00000528685/transcript:ENST00000534187/transcript:ENST00000558084/transcript:ENST00000445387/FAM86B1/transcript:ENST00000481189/transcript:ENST00000413704/transcript:ENST00000312087	transcript:ENST00000425046/transcript:ENST00000353275/transcript:ENST00000441123/transcript:ENST00000340537/transcript:ENST00000431180/transcript:ENST00000334884/transcript:ENST00000468435/transcript:ENST00000530385/transcript:ENST00000465045/KMT2C/transcript:ENST00000413809
BP	GO:0002181	cytoplasmic translation	0.0139 (27/1936)	0.0091 (286/31285)	0.00588946	0.735588	27	transcript:ENST00000465407/RP11-385D13.1/DDX60/transcript:ENST00000547173/transcript:ENST00000549370/transcript:ENST00000572008/ISG15/RP11-1035H13.3/transcript:ENST00000550704/transcript:ENST00000534599/QARS/transcript:ENST00000504325/transcript:ENST00000511473/transcript:ENST00000549098/transcript:ENST00000586146	transcript:ENST00000529920/transcript:ENST00000532746/transcript:ENST00000530170/transcript:ENST00000530721/transcript:ENST00000547475/FARSA/gene:ENSG00000263809/transcript:ENST00000569365/transcript:ENST00000574723/transcript:ENST00000461690/RPL36A-HNRNPH2/transcript:ENST00000503494
BP	GO:0007284	spermatogonial cell division	0.0072 (14/1936)	0.0037 (117/31285)	0.00591524	0.735588	14	CDKL3/transcript:ENST00000576863/ZNF396/transcript:ENST00000482936/transcript:ENST00000334075/IFIH1/CDK18/DHX58	transcript:ENST00000382240/transcript:ENST00000555408/CDKL5/RTEL1/CDK15/transcript:ENST00000576500
BP	GO:0097028	dendritic cell differentiation	0.0129 (25/1936)	0.0083 (259/31285)	0.00595483	0.735588	25	CSF2/FLT1/LILRB2/IRF7/ROS1/OSCAR/BTK/IRF5/IRF8/LILRA6/TMEM176B/CD300C/ATF3/HCK/transcript:ENST00000533182/BATF2/LILRB4/SLA/LILRA5/TRPM2/IRF9/MERTK	transcript:ENST00000503703/ITK/transcript:ENST00000504875
BP	GO:0051607	defense response to virus	0.0677 (131/1936)	0.0602 (1882/31285)	0.0059742	0.735588	131	FCER1G/NIPAL4/transcript:ENST00000392021/CARD16/TREX1/CH25H/MX2/DDX3Y/CXCL3/transcript:ENST00000583741/OSCAR/transcript:ENST00000522644/ECM2/LRRK1/CARD9/transcript:ENST00000507392/transcript:ENST00000564558/IRF8/CD300C/transcript:ENST00000518360/TLR4/ZNF775/GBP5/transcript:ENST00000539881/IRF9/transcript:ENST00000562050/DTX4/transcript:ENST00000471308/EBI3/PTX3/TNFAIP6/TRPA1/transcript:ENST000005…	LRRTM4/transcript:ENST00000479896/transcript:ENST00000496664/C14orf105/MAP2K3/transcript:ENST00000456458/TICAM2/CD6/transcript:ENST00000335760/transcript:ENST00000431534/transcript:ENST00000461221/transcript:ENST00000367667/transcript:ENST00000334884/transcript:ENST00000584668/transcript:ENST00000518622/FBXL2/ITGA10/transcript:ENST00000392995/SLC38A6/AGBL5/transcript:ENST00000431180/transcript:EN…
BP	GO:0034162	toll-like receptor 9 signaling pathway	0.0057 (11/1936)	0.0026 (82/31285)	0.00597439	0.735588	11	NR1I3/CD300C/VDR/TLR2/TLR4/transcript:ENST00000593532/transcript:ENST00000369973/IRAK3	CD300LB/LRRTM4/transcript:ENST00000552309
BP	GO:0007007	inner mitochondrial membrane organization	0.0052 (10/1936)	0.0023 (71/31285)	0.00607286	0.735588	10	transcript:ENST00000394606/MX2/transcript:ENST00000518116/transcript:ENST00000615986/MX1	transcript:ENST00000490078/transcript:ENST00000409258/transcript:ENST00000424959/transcript:ENST00000504902/FAM92A
BP	GO:0070965	positive regulation of neutrophil mediated killing of fungus	0.0021 (4/1936)	0.0004 (14/31285)	0.00626268	0.735588	4	CXCL8/CXCL5/CXCL3/CXCL2
BP	GO:0035759	mesangial cell-matrix adhesion	0.0021 (4/1936)	0.0004 (14/31285)	0.00626268	0.735588	4	CCL8/CCL7/CCL20/CCL3
CC	GO:0030896	checkpoint clamp complex	0.0021 (4/1936)	0.0004 (14/31285)	0.00626268	0.735588	4	transcript:ENST00000358071/transcript:ENST00000513914	transcript:ENST00000325577/RAD9B
BP	GO:0045091	regulation of single stranded viral RNA replication via double stranded DNA intermediate	0.0021 (4/1936)	0.0004 (14/31285)	0.00626268	0.735588	4	CXCL8/CXCL5/CXCL3/CXCL2
BP	GO:0061047	positive regulation of branching involved in lung morphogenesis	0.0041 (8/1936)	0.0016 (50/31285)	0.00628452	0.735588	8	INHBE/JUP/FLT1/GDF15/transcript:ENST00000520579/BMP6/INHBA	transcript:ENST00000504875
MF	GO:0070287	ferritin receptor activity	0.0036 (7/1936)	0.0013 (40/31285)	0.0062888	0.735588	7	CD163/C1QA/transcript:ENST00000588198/C1QB/C1QC/transcript:ENST00000587251	CD6
BP	GO:0002232	leukocyte chemotaxis involved in inflammatory response	0.0036 (7/1936)	0.0013 (40/31285)	0.0062888	0.735588	7	ALOX5/SLAMF7/ALOXE3/CXCL5/CXCL8/CXCL3/CXCL2
BP	GO:0071357	cellular response to type I interferon	0.0036 (7/1936)	0.0013 (40/31285)	0.0062888	0.735588	7	IFIT1/TREX2/TREX1/MX2/IFIT3/MX1/CYP27B1
BP	GO:0046466	membrane lipid catabolic process	0.0026 (5/1936)	0.0007 (22/31285)	0.00650897	0.735588	5	SMPDL3B/CYP1A1/transcript:ENST00000534405	SMPD1/transcript:ENST00000533123
BP	GO:0071727	cellular response to triacyl bacterial lipopeptide	0.0026 (5/1936)	0.0007 (22/31285)	0.00650897	0.735588	5	IL18R1/TLR2/TLR4/CD14/IL1RL1
BP	GO:0097398	cellular response to interleukin-17	0.0057 (11/1936)	0.0027 (83/31285)	0.00654684	0.735588	11	IL1RN/CXCL2/transcript:ENST00000452281/IL6/CXCL5/CXCL8/CXCL3/STAT1/IL1B/transcript:ENST00000583741	transcript:ENST00000584668
MF	GO:1901149	salicylic acid binding	0.0046 (9/1936)	0.0019 (61/31285)	0.00665607	0.735588	9	transcript:ENST00000557348/ALOX5/transcript:ENST00000553837/transcript:ENST00000557433/ALOXE3/GPX3/transcript:ENST00000555563/transcript:ENST00000481262	transcript:ENST00000556825
BP	GO:0070292	N-acylphosphatidylethanolamine metabolic process	0.0031 (6/1936)	0.0010 (31/31285)	0.00676011	0.735588	6	FAM84B/RARRES3/HRASLS/PLA2G4B	JMJD7-PLA2G4B/transcript:ENST00000422589
BP	GO:0006868	glutamine transport	0.0031 (6/1936)	0.0010 (31/31285)	0.00676011	0.735588	6	transcript:ENST00000525723/SLC1A4	transcript:ENST00000566598/SLC38A6/transcript:ENST00000549258/SLC38A4
BP	GO:0031914	negative regulation of synaptic plasticity	0.0062 (12/1936)	0.0030 (95/31285)	0.00680462	0.735588	12	CDKL3/RASGRP3/UNC13D/CDK18	transcript:ENST00000555408/CDKL5/transcript:ENST00000510106/transcript:ENST00000534824/transcript:ENST00000566631/CDK15/RGS17/RGS4
CC	GO:0000439	transcription factor TFIIH core complex	0.0041 (8/1936)	0.0016 (51/31285)	0.00709554	0.735588	8	CDKL3/transcript:ENST00000482936	transcript:ENST00000453535/CDKL5/transcript:ENST00000510106/transcript:ENST00000484049/RTEL1/transcript:ENST00000543415
BP	GO:0070670	response to interleukin-4	0.0041 (8/1936)	0.0016 (51/31285)	0.00709554	0.735588	8	IL1RN/IL1B/transcript:ENST00000452281/CTSZ/STAT1/CCL8/CCL7/CCL3
BP	GO:0045069	regulation of viral genome replication	0.0041 (8/1936)	0.0016 (51/31285)	0.00709554	0.735588	8	transcript:ENST00000507392/transcript:ENST00000429888/DDX3Y/transcript:ENST00000472580/IFIH1/DHX58	BCL2L2-PABPN1/transcript:ENST00000415933
BP	GO:0072540	T-helper 17 cell lineage commitment	0.0057 (11/1936)	0.0027 (84/31285)	0.00716134	0.735588	11	transcript:ENST00000452281/IL6/SLAMF7/IRF9/IRF7/IRF5/STAT1/transcript:ENST00000533182/BATF2/IRF8	LEPR
BP	GO:0006550	isoleucine catabolic process	0.0036 (7/1936)	0.0013 (41/31285)	0.00722412	0.735588	7	transcript:ENST00000583858/transcript:ENST00000567530/transcript:ENST00000481262	transcript:ENST00000527688/ACADVL/DHRS9/RDH5
BP	GO:0090378	seed trichome elongation	0.0036 (7/1936)	0.0013 (41/31285)	0.00722412	0.735588	7	RNF126/SRD5A2/transcript:ENST00000590388/transcript:ENST00000605457	transcript:ENST00000555609/transcript:ENST00000586810/RNF43
BP	GO:0044818	mitotic G2/M transition checkpoint	0.0072 (14/1936)	0.0038 (120/31285)	0.00737774	0.735588	14	CDKL3/CDK18/transcript:ENST00000475656/transcript:ENST00000307834/transcript:ENST00000616467	transcript:ENST00000533482/transcript:ENST00000482010/transcript:ENST00000461221/transcript:ENST00000555408/transcript:ENST00000476843/CDKL5/transcript:ENST00000455743/transcript:ENST00000307849/CDK15
MF	GO:0003725	double-stranded RNA binding	0.0222 (43/1936)	0.0166 (520/31285)	0.00737855	0.735588	43	transcript:ENST00000492414/transcript:ENST00000395745/transcript:ENST00000407982/TUBA8/DDX60/transcript:ENST00000421674/SLC3A2/ECM2/transcript:ENST00000465003/transcript:ENST00000443963/IFIH1/DHX58/PRKRA/TLR4/KRT75/OAS3/transcript:ENST00000483148/NEFM/transcript:ENST00000539881/transcript:ENST00000498479/OAS2/transcript:ENST00000574023/OAS1/TLR2/KRT81/SPTBN5/transcript:ENST00000590388/EPB41L3/tra…	transcript:ENST00000586810/transcript:ENST00000555609/transcript:ENST00000441384/transcript:ENST00000485479/transcript:ENST00000571451/transcript:ENST00000533164/transcript:ENST00000496664/transcript:ENST00000382240/transcript:ENST00000420627/transcript:ENST00000617103/transcript:ENST00000475997/transcript:ENST00000484566/transcript:ENST00000424699/ZNF385D
BP	GO:0048247	lymphocyte chemotaxis	0.0067 (13/1936)	0.0035 (108/31285)	0.00744772	0.735588	13	ADAMTS14/ADAMTS5/CXCL5/CXCL8/CXCL3/CXCL2/CCL8/CCL7/transcript:ENST00000529473/CCL20/CCL3	transcript:ENST00000468065/transcript:ENST00000526491
BP	GO:0015824	proline transport	0.0057 (11/1936)	0.0027 (85/31285)	0.00781992	0.735588	11	SLC7A11/SLC1A4/SLC5A10/SLC6A9/SLC7A5/SLC7A7/SLC3A2	transcript:ENST00000566598/SLC38A6/SLC38A4/transcript:ENST00000549258
BP	GO:0009932	cell tip growth	0.0057 (11/1936)	0.0027 (85/31285)	0.00781992	0.735588	11	ZDHHC11/transcript:ENST00000454552/MYO15B/FMNL3/MYO1G/INPP5J/TRPA1/transcript:ENST00000443120/MYO1F	transcript:ENST00000478793/ANKRD23
CC	GO:0005737	cytoplasm	0.5971 (1156/1936)	0.6319 (19768/31285)	0.0078577	0.735588	1156	transcript:ENST00000442122/CTSZ/transcript:ENST00000535293/transcript:ENST00000576863/transcript:ENST00000463057/transcript:ENST00000457572/RP11-385D13.1/transcript:ENST00000373482/IL1RL1/SLC7A5/transcript:ENST00000594759/transcript:ENST00000583741/MYO1F/transcript:ENST00000522644/transcript:ENST00000614506/ECM2/ADAP2/transcript:ENST00000523864/transcript:ENST00000555259/CBWD5/CCL8/REC8/DNAJC12/t…	transcript:ENST00000419510/transcript:ENST00000564136/transcript:ENST00000536337/LRRTM4/transcript:ENST00000454350/CDK15/KIAA1524/transcript:ENST00000532132/POC1B-GALNT4/transcript:ENST00000340537/transcript:ENST00000532881/transcript:ENST00000482958/transcript:ENST00000548938/CLIC2/transcript:ENST00000599177/FARSA/transcript:ENST00000468435/KLHL7/BORCS8-MEF2B/GABRQ/ZNF140/C14orf105/transcript:EN…
BP	GO:0140460	response to Gram-negative bacterium	0.0031 (6/1936)	0.0010 (32/31285)	0.00793301	0.735588	6	RP11-468E2.1/TNF/transcript:ENST00000513439/transcript:ENST00000529332	transcript:ENST00000561419/transcript:ENST00000528679
BP	GO:1902024	L-histidine transport	0.0031 (6/1936)	0.0010 (32/31285)	0.00793301	0.735588	6	SLC7A11/SLC7A7/SLC7A5/SLC3A2	SLC38A6/SLC38A4
BP	GO:0097026	dendritic cell dendrite assembly	0.0026 (5/1936)	0.0007 (23/31285)	0.00793925	0.735588	5	transcript:ENST00000421364/CCL8/CCL7/CCL20/CCL3
BP	GO:0042868	antisense RNA metabolic process	0.0026 (5/1936)	0.0007 (23/31285)	0.00793925	0.735588	5	transcript:ENST00000401730/gene:ENSG00000255663/transcript:ENST00000475126	transcript:ENST00000601065/transcript:ENST00000542140
BP	GO:1903812	L-serine import across plasma membrane	0.0026 (5/1936)	0.0007 (23/31285)	0.00793925	0.735588	5	SLC1A4	transcript:ENST00000566598/SLC38A6/transcript:ENST00000549258/SLC38A4
BP	GO:1903803	L-glutamine import across plasma membrane	0.0026 (5/1936)	0.0007 (23/31285)	0.00793925	0.735588	5	SLC1A4	transcript:ENST00000566598/SLC38A6/transcript:ENST00000549258/SLC38A4
BP	GO:0019043	establishment of viral latency	0.0026 (5/1936)	0.0007 (23/31285)	0.00793925	0.735588	5	IRF9/IRF7/IRF5/transcript:ENST00000533182/IRF8
BP	GO:0007308	oocyte construction	0.0026 (5/1936)	0.0007 (23/31285)	0.00793925	0.735588	5	SPTBN5/PSTPIP1/transcript:ENST00000512070/transcript:ENST00000495564	gene:ENSG00000273167
MF	GO:0016166	phytoene dehydrogenase activity	0.0015 (3/1936)	0.0003 (8/31285)	0.00796148	0.735588	3	ALOXE3/ALOX5/IL4I1
MF	GO:0004748	ribonucleoside-diphosphate reductase activity, thioredoxin disulfide as acceptor	0.0015 (3/1936)	0.0003 (8/31285)	0.00796148	0.735588	3	RRM1	transcript:ENST00000532170/transcript:ENST00000533349
BP	GO:0009185	ribonucleoside diphosphate metabolic process	0.0015 (3/1936)	0.0003 (8/31285)	0.00796148	0.735588	3	RRM1	transcript:ENST00000532170/transcript:ENST00000533349
CC	GO:0005971	ribonucleoside-diphosphate reductase complex	0.0015 (3/1936)	0.0003 (8/31285)	0.00796148	0.735588	3	RRM1	transcript:ENST00000532170/transcript:ENST00000533349
BP	GO:0009265	2'-deoxyribonucleotide biosynthetic process	0.0015 (3/1936)	0.0003 (8/31285)	0.00796148	0.735588	3	RRM1	transcript:ENST00000532170/transcript:ENST00000533349
BP	GO:2000564	regulation of CD8-positive, alpha-beta T cell proliferation	0.0041 (8/1936)	0.0017 (52/31285)	0.00798304	0.735588	8	NCF4/IRF9/IRF7/PSTPIP1/IRF5/transcript:ENST00000533182/IRF8	NOSTRIN
BP	GO:0023021	termination of signal transduction	0.0041 (8/1936)	0.0017 (52/31285)	0.00798304	0.735588	8	C8orf44-SGK3/RASGRP3/SMPDL3B/transcript:ENST00000534405	transcript:ENST00000531303/SMPD1/RP11-47I22.4/transcript:ENST00000533123
BP	GO:0002224	toll-like receptor signaling pathway	0.0119 (23/1936)	0.0076 (238/31285)	0.0079857	0.735588	23	CTSZ/IRF7/IL1RL1/ECM2/RPS6KA2/IRF5/IRAK3/IRF8/IL18R1/TLR4/ATF3/transcript:ENST00000369973/transcript:ENST00000533182/CTSH/TLR2/IRF9/transcript:ENST00000556575/ADGRA2/CD86	transcript:ENST00000472940/LRRTM4/DCLK1/transcript:ENST00000552309
BP	GO:0019221	cytokine-mediated signaling pathway	0.0424 (82/1936)	0.0357 (1118/31285)	0.008014	0.735588	82	MINOS1-NBL1/transcript:ENST00000412494/IL1RL1/CXCL3/OSCAR/LRRK1/BTK/CCL8/IRF8/IL1RN/IL18R1/ATF3/transcript:ENST00000475972/IL10RA/INHBE/IL1A/SLC1A4/IRF9/C5AR1/EBI3/transcript:ENST00000538239/CSF3/PTGS2/TNFAIP6/CCR5/CSF2RB/LILRA6/transcript:ENST00000452281/PTPRO/CXCL5/HCK/transcript:ENST00000369973/LILRB4/LILRA5/BTC/CXCR4/CXCL8/IL20RB/transcript:ENST00000556575/IL1B/FLT1/IL6/CEBPD/CCL3/IRF5/INHBA/…	transcript:ENST00000479896/RP11-47I22.4/transcript:ENST00000515800/ITK/transcript:ENST00000485036/ZNF80/transcript:ENST00000426902/EFCAB1/PRLR/transcript:ENST00000581104/LEPR/transcript:ENST00000552309/KLF17/transcript:ENST00000504875
BP	GO:0035782	mature natural killer cell chemotaxis	0.0021 (4/1936)	0.0005 (15/31285)	0.00816551	0.735588	4	CCL8/CCL7/CCL20/CCL3
BP	GO:2000518	negative regulation of T-helper 1 cell activation	0.0021 (4/1936)	0.0005 (15/31285)	0.00816551	0.735588	4	CCL8/CCL7/CCL20/CCL3
BP	GO:1903294	regulation of glutamate secretion, neurotransmission	0.0021 (4/1936)	0.0005 (15/31285)	0.00816551	0.735588	4		SLC38A4/transcript:ENST00000549258/transcript:ENST00000566598/SLC38A6
CC	GO:0032994	protein-lipid complex	0.0021 (4/1936)	0.0005 (15/31285)	0.00816551	0.735588	4	transcript:ENST00000496241/SNX10	ECI2/transcript:ENST00000368979
BP	GO:2000513	positive regulation of granzyme A production	0.0021 (4/1936)	0.0005 (15/31285)	0.00816551	0.735588	4	CCL8/CCL7/CCL20/CCL3
BP	GO:0001805	positive regulation of type III hypersensitivity	0.0046 (9/1936)	0.0020 (63/31285)	0.00822348	0.735588	9	FCER1G/SLA/transcript:ENST00000483665/LILRB2/BTK/HCK/FCGR1A	FCGR2A/ITK
BP	GO:2001198	regulation of dendritic cell differentiation	0.0046 (9/1936)	0.0020 (63/31285)	0.00822348	0.735588	9	LILRA5/LILRB2/LILRB4/CEBPD/HLA-F/ULBP1/HLA-C/LILRA6/OSCAR
BP	GO:0099533	positive regulation of presynaptic cytosolic calcium concentration	0.0036 (7/1936)	0.0013 (42/31285)	0.00825851	0.735588	7	CDKL3/CDK18	transcript:ENST00000555408/CDKL5/transcript:ENST00000510106/transcript:ENST00000566631/CDK15
BP	GO:1904273	L-alanine import across plasma membrane	0.0036 (7/1936)	0.0013 (42/31285)	0.00825851	0.735588	7	SLC7A11/SLC1A4/SLC7A7/SLC7A5/SLC3A2	SLC38A6/SLC38A4
BP	GO:0046686	response to cadmium ion	0.0263 (51/1936)	0.0206 (645/31285)	0.00882665	0.751298	51	CDKL3/CBS/FLT1/CES3/TRIB3/RP11-385D13.1/ESR1/RP11-295K3.1/transcript:ENST00000547173/ZIC2/CES1/transcript:ENST00000565012/CAMK1D/transcript:ENST00000375290/CYP27B1/ERN1/transcript:ENST00000558357/CHAC1/JUP/MMP12/ABCC3/transcript:ENST00000557433/CBSL/transcript:ENST00000541505/DUSP1/MMP3/transcript:ENST00000553837/transcript:ENST00000357390/transcript:ENST00000474308/CDK18/SLC15A3	PTCH1/transcript:ENST00000536532/CDK15/transcript:ENST00000561139/transcript:ENST00000482958/transcript:ENST00000527688/transcript:ENST00000547475/transcript:ENST00000566631/transcript:ENST00000555408/DCLK1/transcript:ENST00000484566/transcript:ENST00000453535/RDH5/MAP2K3/transcript:ENST00000588814/TTC12/CDKL5/DHRS9/transcript:ENST00000544223/transcript:ENST00000504875
MF	GO:0000014	single-stranded DNA endodeoxyribonuclease activity	0.0052 (10/1936)	0.0024 (75/31285)	0.00891795	0.751298	10	BIVM-ERCC5/HELZ2/transcript:ENST00000445387/DDX60	transcript:ENST00000533482/transcript:ENST00000425046/ERCC5/transcript:ENST00000457367/transcript:ENST00000413809/transcript:ENST00000388749
BP	GO:0035020	regulation of Rac protein signal transduction	0.0124 (24/1936)	0.0081 (254/31285)	0.00893933	0.751298	24	transcript:ENST00000460679/RASGRP3/MX2/ARHGAP40/RASGRF2/ARHGAP4/transcript:ENST00000540424/transcript:ENST00000618568/transcript:ENST00000495242/transcript:ENST00000551092/transcript:ENST00000541960/transcript:ENST00000570856/BCAM/KBTBD12/RASGEF1B/ARHGAP30/transcript:ENST00000512070/MX1	transcript:ENST00000476905/BBS4/TMTC2/transcript:ENST00000481102/transcript:ENST00000458140/gene:ENSG00000273167
BP	GO:0070981	L-asparagine biosynthetic process	0.0010 (2/1936)	0.0001 (3/31285)	0.00907296	0.751298	2	transcript:ENST00000454046/ASNS
BP	GO:0006529	asparagine biosynthetic process	0.0010 (2/1936)	0.0001 (3/31285)	0.00907296	0.751298	2	transcript:ENST00000454046/ASNS
BP	GO:0019500	cyanide catabolic process	0.0010 (2/1936)	0.0001 (3/31285)	0.00907296	0.751298	2	CBSL/CBS
MF	GO:0050017	L-3-cyanoalanine synthase activity	0.0010 (2/1936)	0.0001 (3/31285)	0.00907296	0.751298	2	CBSL/CBS
CC	GO:0061834	actin filament branch point	0.0010 (2/1936)	0.0001 (3/31285)	0.00907296	0.751298	2		transcript:ENST00000414983/transcript:ENST00000420201
MF	GO:0004066	asparagine synthase (glutamine-hydrolyzing) activity	0.0010 (2/1936)	0.0001 (3/31285)	0.00907296	0.751298	2	transcript:ENST00000454046/ASNS
BP	GO:2000654	regulation of cellular response to testosterone stimulus	0.0010 (2/1936)	0.0001 (3/31285)	0.00907296	0.751298	2	transcript:ENST00000555840	transcript:ENST00000628474
BP	GO:0014805	smooth muscle adaptation	0.0010 (2/1936)	0.0001 (3/31285)	0.00907296	0.751298	2	IL1B/IL1RN
CC	GO:0061835	ventral surface of cell	0.0010 (2/1936)	0.0001 (3/31285)	0.00907296	0.751298	2		transcript:ENST00000414983/transcript:ENST00000420201
BP	GO:0030989	dynein-driven meiotic oscillatory nuclear movement	0.0046 (9/1936)	0.0020 (64/31285)	0.00910516	0.751298	9	MYO15B/MYO1G/PSTPIP1/DNAH12/transcript:ENST00000434055/MYO1F	transcript:ENST00000415891/DYNC1I1/DCTN1
BP	GO:0032233	positive regulation of actin filament bundle assembly	0.0072 (14/1936)	0.0039 (123/31285)	0.00911393	0.751298	14	transcript:ENST00000468323/transcript:ENST00000493815/transcript:ENST00000435201/LMO1/CCL8/CCL7/ERN1	transcript:ENST00000420627/MAP2K3/CSRP3/SHROOM2/transcript:ENST00000498169/transcript:ENST00000460404/AL513122.2
CC	GO:0000307	cyclin-dependent protein kinase holoenzyme complex	0.0093 (18/1936)	0.0056 (174/31285)	0.0091188	0.751298	18	transcript:ENST00000409403/CDKL3/CCNL1/CDK18/CCNO/transcript:ENST00000488340/ERN1	transcript:ENST00000382240/transcript:ENST00000453535/transcript:ENST00000555408/CDKL5/transcript:ENST00000510106/transcript:ENST00000470121/transcript:ENST00000566631/transcript:ENST00000484049/transcript:ENST00000482621/transcript:ENST00000544041/CDK15
BP	GO:0045786	negative regulation of cell cycle	0.0284 (55/1936)	0.0226 (707/31285)	0.00920836	0.754902	55	HOXD9/transcript:ENST00000442122/CDKL3/FLI1/ALOX5/LILRB2/HRASLS/RAP1GAP/CEBPD/PTGS2/ESR1/transcript:ENST00000474348/OSCAR/RARRES3/RUNX3/RPS6KA2/transcript:ENST00000445387/INHBA/ANKRD45/LILRA6/transcript:ENST00000507218/transcript:ENST00000409403/NR4A1/PTPRO/HOXA10/GDF15/BMP6/HELZ2/VIP/LILRB4/INHBE/LILRA5/EHF/NUPR1/transcript:ENST00000357390/ALOXE3/transcript:ENST00000556575/CDK18	transcript:ENST00000472940/ELF5/transcript:ENST00000503703/CDK15/transcript:ENST00000479896/transcript:ENST00000461221/transcript:ENST00000533907/transcript:ENST00000566631/transcript:ENST00000575400/transcript:ENST00000382240/transcript:ENST00000555408/DCLK1/transcript:ENST00000510106/RNF43/CDKL5/transcript:ENST00000455743/transcript:ENST00000413809
CC	GO:0098831	presynaptic active zone cytoplasmic component	0.0098 (19/1936)	0.0060 (188/31285)	0.00956414	0.771035	19	RASGRP3/ARHGAP40/SYTL1/SYT7/CTNND2/transcript:ENST00000521724/transcript:ENST00000495242/transcript:ENST00000426248/JUP/PLA2G4B/DYSF/transcript:ENST00000421462/ERC2/gene:ENSG00000268400/ARHGAP9/UNC13D	SYTL5/SYTL2/JMJD7-PLA2G4B
BP	GO:0035753	maintenance of DNA trinucleotide repeats	0.0026 (5/1936)	0.0008 (24/31285)	0.00957378	0.771035	5	BIVM-ERCC5/transcript:ENST00000601091/transcript:ENST00000594759	transcript:ENST00000533482/ERCC5
BP	GO:0045655	regulation of monocyte differentiation	0.0026 (5/1936)	0.0008 (24/31285)	0.00957378	0.771035	5	IRF9/IRF7/IRF5/transcript:ENST00000533182/IRF8
MF	GO:0004896	cytokine receptor activity	0.0083 (16/1936)	0.0048 (149/31285)	0.00959231	0.771035	16	IL18R1/EBI3/IL2RG/TLR2/FLT1/CCR5/TLR4/transcript:ENST00000475972/transcript:ENST00000522484/CSF2RB/IL20RB/IL1RL1/transcript:ENST00000469964	PRLR/LEPR/transcript:ENST00000504875
BP	GO:2000302	positive regulation of synaptic vesicle exocytosis	0.0046 (9/1936)	0.0021 (65/31285)	0.0100565	0.802455	9	CES1/MX2/CES3/transcript:ENST00000425141/MX1	BCL2L2-PABPN1/transcript:ENST00000482958/SLC4A3/SLC4A4
BP	GO:0042590	antigen processing and presentation of exogenous peptide antigen via MHC class I	0.0057 (11/1936)	0.0028 (88/31285)	0.0100806	0.802455	11	FCER1G/transcript:ENST00000483665/LILRB2/CLEC12A/MPEG1/HLA-F/FCGR1A/ULBP1/HLA-C	FCGR2A/CHODL
CC	GO:1990630	IRE1-RACK1-PP2A complex	0.0021 (4/1936)	0.0005 (16/31285)	0.0104109	0.811441	4	transcript:ENST00000504325/transcript:ENST00000511473/ERN1	transcript:ENST00000503494
BP	GO:0071624	positive regulation of granulocyte chemotaxis	0.0021 (4/1936)	0.0005 (16/31285)	0.0104109	0.811441	4	C5AR1/FPR3/GPR1/CMKLR1
MF	GO:0005153	interleukin-8 receptor binding	0.0021 (4/1936)	0.0005 (16/31285)	0.0104109	0.811441	4	CXCL8/CXCL5/CXCL3/CXCL2
BP	GO:2000558	positive regulation of immunoglobulin production in mucosal tissue	0.0021 (4/1936)	0.0005 (16/31285)	0.0104109	0.811441	4	CCL8/CCL7/CCL20/CCL3
BP	GO:0002753	cytoplasmic pattern recognition receptor signaling pathway	0.0072 (14/1936)	0.0040 (125/31285)	0.0104397	0.811441	14	LRRK1/IRF9/IRF7/transcript:ENST00000587339/RP11-385D13.1/IPO4/IFIH1/IRF5/transcript:ENST00000533182/DHX58/IRF8	transcript:ENST00000461221/transcript:ENST00000573196/transcript:ENST00000466227
MF	GO:0016410	N-acyltransferase activity	0.0036 (7/1936)	0.0014 (44/31285)	0.0106479	0.816474	7	FAM84B/RARRES3/HRASLS/PLA2G4B/transcript:ENST00000380189	JMJD7-PLA2G4B/transcript:ENST00000547787
MF	GO:0015186	L-glutamine transmembrane transporter activity	0.0031 (6/1936)	0.0011 (34/31285)	0.0107056	0.816474	6	transcript:ENST00000525723/SLC1A4	transcript:ENST00000566598/SLC38A6/transcript:ENST00000549258/SLC38A4
BP	GO:0046890	regulation of lipid biosynthetic process	0.0031 (6/1936)	0.0011 (34/31285)	0.0107056	0.816474	6	TREX2/PCK2/TREX1/ABCA5/ABCA10	transcript:ENST00000586995
BP	GO:0019086	late viral transcription	0.0031 (6/1936)	0.0011 (34/31285)	0.0107056	0.816474	6	transcript:ENST00000424354/CCNL1/transcript:ENST00000394606/transcript:ENST00000488340	transcript:ENST00000470121/transcript:ENST00000484049
MF	GO:0004519	endonuclease activity	0.0165 (32/1936)	0.0119 (371/31285)	0.0107522	0.816474	32	TDRD6/TRPA1/N4BP2/DDX60/transcript:ENST00000547173/transcript:ENST00000593946/transcript:ENST00000465003/BIVM-ERCC5/transcript:ENST00000445387/IFIH1/EME2/ERN1/RRM1/ISG20/HELZ2/transcript:ENST00000483148/PARP9/transcript:ENST00000467324/transcript:ENST00000523214/transcript:ENST00000524647	transcript:ENST00000425046/ERCC5/transcript:ENST00000530170/transcript:ENST00000530721/transcript:ENST00000528879/transcript:ENST00000511480/transcript:ENST00000547475/transcript:ENST00000463194/NCAM2/transcript:ENST00000457367/transcript:ENST00000413809/transcript:ENST00000522310
BP	GO:1903423	positive regulation of synaptic vesicle recycling	0.0046 (9/1936)	0.0021 (66/31285)	0.0110807	0.837557	9	SYTL1/MX2/SYT7/DYSF/INPP5J/MX1	transcript:ENST00000455997/SYTL2/SYTL5
BP	GO:1901494	regulation of cysteine metabolic process	0.0041 (8/1936)	0.0018 (55/31285)	0.0111468	0.838711	8	C8orf44-SGK3/SLC7A11/RPS6KA2/transcript:ENST00000556575/SLC7A5/SLC7A7	transcript:ENST00000382240/transcript:ENST00000472940
MF	GO:0042015	interleukin-20 binding	0.0015 (3/1936)	0.0003 (9/31285)	0.0114483	0.849751	3	IL20RB/transcript:ENST00000469964/transcript:ENST00000475972
BP	GO:0019346	transsulfuration	0.0015 (3/1936)	0.0003 (9/31285)	0.0114483	0.849751	3	CBSL/CBS/CTH
BP	GO:0051410	detoxification of nitrogen compound	0.0015 (3/1936)	0.0003 (9/31285)	0.0114483	0.849751	3	CBSL/CBS/MOCOS
BP	GO:0031665	negative regulation of lipopolysaccharide-mediated signaling pathway	0.0057 (11/1936)	0.0029 (90/31285)	0.011846	0.875326	11	IL18R1/LILRA5/CARD16/LILRB2/TRIB3/LILRB4/IL1RL1/LILRA6/OSCAR	transcript:ENST00000519646/transcript:ENST00000518622
BP	GO:0002065	columnar/cuboidal epithelial cell differentiation	0.0036 (7/1936)	0.0014 (45/31285)	0.0120143	0.883803	7	CD163/transcript:ENST00000588198/TNFAIP6/transcript:ENST00000443875/transcript:ENST00000587251	CD6/CSMD3
CC	GO:0036019	endolysosome	0.0077 (15/1936)	0.0045 (140/31285)	0.012119	0.884631	15	C8orf44-SGK3/TLR2/RASGRP3/CTSZ/SMPDL3B/TLR4/transcript:ENST00000635811/MPEG1/transcript:ENST00000534405/CTSH	transcript:ENST00000531303/SMPD1/RP11-47I22.4/LRRTM4/transcript:ENST00000533123
BP	GO:0006287	base-excision repair, gap-filling	0.0046 (9/1936)	0.0021 (67/31285)	0.012181	0.884631	9	transcript:ENST00000593946/transcript:ENST00000465003/transcript:ENST00000601091/transcript:ENST00000631044/transcript:ENST00000483148/transcript:ENST00000594759/DDX60	transcript:ENST00000522610/transcript:ENST00000614063
MF	GO:0004693	cyclin-dependent protein serine/threonine kinase activity	0.0083 (16/1936)	0.0049 (153/31285)	0.0121866	0.884631	16	transcript:ENST00000409403/CDKL3/CCNL1/CDK18/transcript:ENST00000488340/ERN1	transcript:ENST00000382240/transcript:ENST00000453535/transcript:ENST00000555408/CDKL5/transcript:ENST00000510106/transcript:ENST00000470121/transcript:ENST00000566631/transcript:ENST00000484049/transcript:ENST00000544041/CDK15
BP	GO:0002222	stimulatory killer cell immunoglobulin-like receptor signaling pathway	0.0031 (6/1936)	0.0011 (35/31285)	0.0123218	0.885041	6	TYROBP/LILRA5/LILRB2/LILRA6/LILRB4/OSCAR
MF	GO:0140827	zinc chaperone activity	0.0031 (6/1936)	0.0011 (35/31285)	0.0123218	0.885041	6	transcript:ENST00000456188/transcript:ENST00000621474/CBWD5/transcript:ENST00000465014/transcript:ENST00000612045	transcript:ENST00000612050
MF	GO:0004518	nuclease activity	0.0067 (13/1936)	0.0037 (115/31285)	0.0123534	0.885041	13	TDRD6/transcript:ENST00000480240/transcript:ENST00000523214/HELZ2/transcript:ENST00000489775/PLSCR1/DFFB/IFIH1/DHX58	transcript:ENST00000528879/transcript:ENST00000491998/transcript:ENST00000522310/transcript:ENST00000507978
BP	GO:0045579	positive regulation of B cell differentiation	0.0093 (18/1936)	0.0058 (180/31285)	0.0126696	0.890243	18	IL2RG/transcript:ENST00000452281/MMP9/ATP8B3/EHF/MMP12/transcript:ENST00000555630/BTK/HCK/INPP5J/ATP11A/STAT1/MMP3	PPP2R3C/ATP8A1/transcript:ENST00000515800/ELF5/ITK
BP	GO:0034142	toll-like receptor 4 signaling pathway	0.0129 (25/1936)	0.0088 (276/31285)	0.0127849	0.890243	25	IRF7/IFI35/CD14/LRRK1/ECM2/BTK/IRF5/IRAK3/IRF8/IL18R1/FLRT1/TLR4/OAS3/HCK/transcript:ENST00000369973/transcript:ENST00000533182/SLA/OAS2/TLR2/OAS1/IRF9	ITK/transcript:ENST00000525353/transcript:ENST00000552309/TICAM2
BP	GO:0061844	antimicrobial humoral immune response mediated by antimicrobial peptide	0.0155 (30/1936)	0.0111 (347/31285)	0.0127987	0.890243	30	CD163/transcript:ENST00000588198/TNFAIP6/C1R/CXCL3/CCL3/C1S/CCL8/transcript:ENST00000587251/HIST2H2BF/C2/KRT75/HIST1H2BG/CXCL5/transcript:ENST00000443875/VIP/CXCL2/CCL7/NEFM/LGALS9/transcript:ENST00000621967/KRT81/HIST2H2BE/CXCL8/CCL20	CSMD3/transcript:ENST00000561139/CHODL/transcript:ENST00000434658/CD6
MF	GO:0045322	unmethylated CpG binding	0.0057 (11/1936)	0.0029 (91/31285)	0.0128124	0.890243	11	transcript:ENST00000558084/TLR2/TLR4/transcript:ENST00000413704/transcript:ENST00000445387	FBXL2/transcript:ENST00000448002/transcript:ENST00000465045/transcript:ENST00000334884/KMT2C/LRRTM4
MF	GO:0003729	mRNA binding	0.0594 (115/1936)	0.0534 (1670/31285)	0.0129784	0.890243	115	transcript:ENST00000590171/CBS/TRIB3/RP11-385D13.1/DDX3Y/ARHGAP40/transcript:ENST00000583741/transcript:ENST00000522644/transcript:ENST00000443963/transcript:ENST00000507392/transcript:ENST00000553837/transcript:ENST00000600806/transcript:ENST00000590388/transcript:ENST00000502762/transcript:ENST00000504325/transcript:ENST00000557087/transcript:ENST00000605457/transcript:ENST00000471308/transcrip…	transcript:ENST00000495527/transcript:ENST00000456182/gene:ENSG00000263809/transcript:ENST00000496664/transcript:ENST00000415933/transcript:ENST00000528081/transcript:ENST00000338163/transcript:ENST00000601065/transcript:ENST00000544223/transcript:ENST00000532746/transcript:ENST00000335760/CSRP3/transcript:ENST00000530170/transcript:ENST00000522791/transcript:ENST00000586810/transcript:ENST000005…
BP	GO:0043090	amino acid import	0.0021 (4/1936)	0.0005 (17/31285)	0.0130199	0.890243	4		SLC38A4/transcript:ENST00000549258/transcript:ENST00000566598/SLC38A6
MF	GO:0015655	alanine:sodium symporter activity	0.0021 (4/1936)	0.0005 (17/31285)	0.0130199	0.890243	4		SLC38A4/transcript:ENST00000549258/transcript:ENST00000566598/SLC38A6
BP	GO:0010230	alternative respiration	0.0021 (4/1936)	0.0005 (17/31285)	0.0130199	0.890243	4	transcript:ENST00000481262/transcript:ENST00000400769/transcript:ENST00000436747	ACADVL
BP	GO:0006235	dTTP biosynthetic process	0.0021 (4/1936)	0.0005 (17/31285)	0.0130199	0.890243	4	CMPK2/RRM1	transcript:ENST00000532170/transcript:ENST00000533349
CC	GO:0070692	CTDK-1 complex	0.0021 (4/1936)	0.0005 (17/31285)	0.0130199	0.890243	4	CCNL1	transcript:ENST00000544041/transcript:ENST00000470121/transcript:ENST00000555408
CC	GO:0005743	mitochondrial inner membrane	0.0656 (127/1936)	0.0596 (1866/31285)	0.0132208	0.890243	127	transcript:ENST00000464443/MX2/transcript:ENST00000463057/ARHGAP40/gene:ENSG00000280571/LRRK1/transcript:ENST00000615986/BTK/CYP27B1/AC024592.12/PTGES/transcript:ENST00000423069/LGALS9/transcript:ENST00000557348/AP000304.12/transcript:ENST00000553837/SLC1A4/transcript:ENST00000592091/transcript:ENST00000585494/IL4I1/transcript:ENST00000359944/transcript:ENST00000545215/SSH3/transcript:ENST0000051…	transcript:ENST00000532881/transcript:ENST00000503915/transcript:ENST00000556825/transcript:ENST00000422589/transcript:ENST00000378081/transcript:ENST00000415933/transcript:ENST00000586995/transcript:ENST00000404127/transcript:ENST00000482309/FAM92A/JMJD7-PLA2G4B/transcript:ENST00000547318/DHRS9/transcript:ENST00000493963/RDH5/ACADVL/transcript:ENST00000530170/transcript:ENST00000530721/ITK/trans…
BP	GO:1900122	positive regulation of receptor binding	0.0046 (9/1936)	0.0022 (68/31285)	0.0133607	0.890243	9	MMP9/MRC1/MMP12/HLA-C/HLA-F/ULBP1/NGF/MMP3	transcript:ENST00000561139
MF	GO:0030549	acetylcholine receptor activator activity	0.0036 (7/1936)	0.0015 (46/31285)	0.0135028	0.890243	7	CDKL3/CDK18	transcript:ENST00000555408/CDKL5/transcript:ENST00000510106/transcript:ENST00000566631/CDK15
BP	GO:1900086	positive regulation of peptidyl-tyrosine autophosphorylation	0.0036 (7/1936)	0.0015 (46/31285)	0.0135028	0.890243	7	MINOS1-NBL1/IQGAP2/PGF/CTNND2/transcript:ENST00000421462/transcript:ENST00000426248	transcript:ENST00000633485
BP	GO:0048491	retrograde synaptic vesicle transport	0.0036 (7/1936)	0.0015 (46/31285)	0.0135028	0.890243	7	transcript:ENST00000434055/CDK18	transcript:ENST00000415891/transcript:ENST00000555408/transcript:ENST00000510106/DCTN1/CDK15
MF	GO:0140954	histone H3K36 dimethyltransferase activity	0.0036 (7/1936)	0.0015 (46/31285)	0.0135028	0.890243	7	transcript:ENST00000445387/transcript:ENST00000312087	transcript:ENST00000425046/transcript:ENST00000353275/transcript:ENST00000431180/transcript:ENST00000413809/KMT2C
MF	GO:0000035	acyl binding	0.0036 (7/1936)	0.0015 (46/31285)	0.0135028	0.890243	7	ZDHHC11/GNAL/TRPA1/transcript:ENST00000443120/GNA15	transcript:ENST00000478793/ANKRD23
BP	GO:0006564	L-serine biosynthetic process	0.0036 (7/1936)	0.0015 (46/31285)	0.0135028	0.890243	7	transcript:ENST00000557348/transcript:ENST00000553837/PSAT1/transcript:ENST00000557433/transcript:ENST00000555563	transcript:ENST00000527688/transcript:ENST00000556825
BP	GO:0060700	regulation of ribonuclease activity	0.0026 (5/1936)	0.0008 (26/31285)	0.0135065	0.890243	5	OAS2/OAS1/OAS3	PDE11A/PDE3A
MF	GO:0106018	phosphatidylinositol-3,5-bisphosphate phosphatase activity	0.0026 (5/1936)	0.0008 (26/31285)	0.0135065	0.890243	5	MTMR1/MTMR10/transcript:ENST00000441228/transcript:ENST00000530200	transcript:ENST00000455997
BP	GO:0002725	negative regulation of T cell cytokine production	0.0062 (12/1936)	0.0033 (104/31285)	0.0136184	0.893333	12	LILRA5/LILRB2/ULBP1/LILRB4/CCL7/CCL3/HLA-F/CCL8/CCL20/HLA-C/LILRA6/OSCAR
BP	GO:0051901	positive regulation of mitochondrial depolarization	0.0077 (15/1936)	0.0045 (142/31285)	0.0136793	0.893333	15	FLRT1/transcript:ENST00000460679/ECM2/TLR2/FLT1/ALOX5/DCN/ALOXE3/ADCY10/transcript:ENST00000504325/transcript:ENST00000511473/ADGRA2/P2RX7	transcript:ENST00000503494/transcript:ENST00000504875
BP	GO:0070092	regulation of glucagon secretion	0.0041 (8/1936)	0.0018 (57/31285)	0.0137161	0.893333	8	SYTL1/IL6/SYT7/PLA2G4B/UNC13D	JMJD7-PLA2G4B/SYTL2/SYTL5
BP	GO:0009299	mRNA transcription	0.0052 (10/1936)	0.0026 (80/31285)	0.0137914	0.894704	10	transcript:ENST00000409403/IRF9/transcript:ENST00000507392/IRF7/BTC/DDX3Y/IRF5/transcript:ENST00000533182/IRF8	transcript:ENST00000510106
BP	GO:0051873	killing by host of symbiont cells	0.0031 (6/1936)	0.0012 (36/31285)	0.0141019	0.904165	6	CXCL5/CXCL8/GSDMB/CXCL3/CXCL2	transcript:ENST00000524039
MF	GO:0008409	5'-3' exonuclease activity	0.0031 (6/1936)	0.0012 (36/31285)	0.0141019	0.904165	6	BIVM-ERCC5/transcript:ENST00000480240	transcript:ENST00000528879/transcript:ENST00000457367/ERCC5/transcript:ENST00000591254
MF	GO:0048020	CCR chemokine receptor binding	0.0031 (6/1936)	0.0012 (36/31285)	0.0141019	0.904165	6	CCR5/CXCL8/CCL20/CCL8/CCL7/CCL3
BP	GO:0035455	response to interferon-alpha	0.0072 (14/1936)	0.0042 (130/31285)	0.0144166	0.91968	14	KLHL6/KBTBD12/MX2/BST2/transcript:ENST00000492414/IFITM2/KLHDC7B/PLSCR1/IFITM3/MX1/IFITM1	transcript:ENST00000382240/transcript:ENST00000496664/KLHL7
BP	GO:0016082	synaptic vesicle priming	0.0077 (15/1936)	0.0046 (143/31285)	0.0145157	0.91968	15	gene:ENSG00000268400/RASGRP3/SYTL1/SYT7/PLA2G4B/DYSF/transcript:ENST00000311943/INPP5J/UNC13D/ERC2	JMJD7-PLA2G4B/transcript:ENST00000455997/SYTL2/SYTL5/transcript:ENST00000594001
BP	GO:0032873	negative regulation of stress-activated MAPK cascade	0.0062 (12/1936)	0.0034 (105/31285)	0.0146157	0.91968	12	SSH3/QARS/transcript:ENST00000429888/PPM1D/transcript:ENST00000498765/transcript:ENST00000472580/transcript:ENST00000394606/DUSP1	transcript:ENST00000532881/transcript:ENST00000392995/transcript:ENST00000430182/transcript:ENST00000415933
BP	GO:2000556	positive regulation of T-helper 1 cell cytokine production	0.0046 (9/1936)	0.0022 (69/31285)	0.0146229	0.91968	9	IL18R1/IL1RN/IL1B/CCL20/transcript:ENST00000421364/IL1RL1/CCL8/CCL7/CCL3
BP	GO:1905038	regulation of membrane lipid metabolic process	0.0046 (9/1936)	0.0022 (69/31285)	0.0146229	0.91968	9	ATP8B3/TNF/transcript:ENST00000504325/ATP11A/transcript:ENST00000511473/WDFY4	transcript:ENST00000485036/ATP8A1/transcript:ENST00000503494
BP	GO:0048286	lung alveolus development	0.0243 (47/1936)	0.0193 (604/31285)	0.01506	0.921702	47	transcript:ENST00000460679/FLT1/TRIB3/ESR1/SLC7A5/ROS1/transcript:ENST00000491638/MMP9/SLC7A11/MSC/transcript:ENST00000485789/ABCA10/gene:ENSG00000259753/PGF/IGFBP3/INHBA/CLDN1/transcript:ENST00000558161/HOXA10/MMP12/GDF15/BMP6/ATF3/transcript:ENST00000522484/IGFBP1/FOXD4L1/SMPD3/transcript:ENST00000560451/SLC7A7/transcript:ENST00000498479/MMP3/INHBE/ABCA5/HOXA5/C1QA/CLDN7/C1QC	transcript:ENST00000441123/transcript:ENST00000536532/SOX7/TMTC2/HOXB6/transcript:ENST00000468435/HS6ST3/transcript:ENST00000586995/COL17A1/transcript:ENST00000504875
BP	GO:0046085	adenosine metabolic process	0.0036 (7/1936)	0.0015 (47/31285)	0.0151189	0.921702	7	NT5C3A/transcript:ENST00000452156/CYP27B1	transcript:ENST00000531547/transcript:ENST00000456458/transcript:ENST00000536532/ACPP
BP	GO:0060977	coronary vasculature morphogenesis	0.0041 (8/1936)	0.0019 (58/31285)	0.0151512	0.921702	8	SGCG/transcript:ENST00000445387/HES1/HEY1	transcript:ENST00000431180/transcript:ENST00000611848/transcript:ENST00000334884/KMT2C
BP	GO:0099502	calcium-dependent activation of synaptic vesicle fusion	0.0041 (8/1936)	0.0019 (58/31285)	0.0151512	0.921702	8	SYTL1/SYT7/PLA2G4B/DYSF/UNC13D	JMJD7-PLA2G4B/SYTL2/SYTL5
CC	GO:0005634	nucleus	0.5294 (1025/1936)	0.5592 (17495/31285)	0.0152433	0.921702	1025	transcript:ENST00000442122/CTSZ/transcript:ENST00000535293/transcript:ENST00000576863/transcript:ENST00000463057/transcript:ENST00000443819/RP11-385D13.1/transcript:ENST00000373482/transcript:ENST00000594759/transcript:ENST00000583741/MYO1F/transcript:ENST00000522644/transcript:ENST00000614506/ADAP2/transcript:ENST00000574951/transcript:ENST00000523864/AC138969.4/transcript:ENST00000623287/REC8/D…	transcript:ENST00000419510/transcript:ENST00000425046/transcript:ENST00000564136/transcript:ENST00000536337/transcript:ENST00000454350/CDK15/transcript:ENST00000532881/PCDHGA1/transcript:ENST00000482958/transcript:ENST00000548938/CLIC2/transcript:ENST00000599177/transcript:ENST00000468435/transcript:ENST00000535558/KLHL7/BORCS8-MEF2B/ZNF140/C14orf105/DDB2/transcript:ENST00000404127/SYTL2/transcri…
MF	GO:0051377	mannose-ethanolamine phosphotransferase activity	0.0015 (3/1936)	0.0003 (10/31285)	0.0156803	0.921702	3	transcript:ENST00000506402	transcript:ENST00000420164/transcript:ENST00000504187
CC	GO:0070876	SOSS complex	0.0015 (3/1936)	0.0003 (10/31285)	0.0156803	0.921702	3	transcript:ENST00000307834	transcript:ENST00000476843/transcript:ENST00000307849
BP	GO:0060559	positive regulation of calcidiol 1-monooxygenase activity	0.0015 (3/1936)	0.0003 (10/31285)	0.0156803	0.921702	3	IL1RN/TNF/IL1B
BP	GO:0006222	UMP biosynthetic process	0.0015 (3/1936)	0.0003 (10/31285)	0.0156803	0.921702	3	transcript:ENST00000462091/transcript:ENST00000479719	transcript:ENST00000467167
BP	GO:0052472	modulation by host of symbiont transcription	0.0015 (3/1936)	0.0003 (10/31285)	0.0156803	0.921702	3	transcript:ENST00000582022	transcript:ENST00000579877/transcript:ENST00000542343
BP	GO:0019448	L-cysteine catabolic process	0.0015 (3/1936)	0.0003 (10/31285)	0.0156803	0.921702	3	CBSL/gene:ENSG00000272897/CBS
CC	GO:0071821	FANCM-MHF complex	0.0015 (3/1936)	0.0003 (10/31285)	0.0156803	0.921702	3	DHX58/IFIH1	transcript:ENST00000254262
BP	GO:2000314	negative regulation of fibroblast growth factor receptor signaling pathway involved in neural plate anterior/posterior pattern formation	0.0015 (3/1936)	0.0003 (10/31285)	0.0156803	0.921702	3	transcript:ENST00000525370/transcript:ENST00000377092/transcript:ENST00000525130
CC	GO:0110092	nucleus leading edge	0.0015 (3/1936)	0.0003 (10/31285)	0.0156803	0.921702	3	transcript:ENST00000434055	DCTN1/transcript:ENST00000415891
BP	GO:0042866	pyruvate biosynthetic process	0.0015 (3/1936)	0.0003 (10/31285)	0.0156803	0.921702	3	transcript:ENST00000569857/transcript:ENST00000567118/SDS
BP	GO:1990831	cellular response to carcinoembryonic antigen	0.0015 (3/1936)	0.0003 (10/31285)	0.0156803	0.921702	3	gene:ENSG00000255663/transcript:ENST00000600806	transcript:ENST00000542140
BP	GO:0010908	regulation of heparan sulfate proteoglycan biosynthetic process	0.0015 (3/1936)	0.0003 (10/31285)	0.0156803	0.921702	3	RP11-468E2.1/transcript:ENST00000529332	transcript:ENST00000561419
MF	GO:0070854	myosin VI heavy chain binding	0.0015 (3/1936)	0.0003 (10/31285)	0.0156803	0.921702	3	transcript:ENST00000434055	DCTN1/transcript:ENST00000415891
CC	GO:0019908	nuclear cyclin-dependent protein kinase holoenzyme complex	0.0026 (5/1936)	0.0009 (27/31285)	0.0158284	0.921702	5	CCNL1	transcript:ENST00000555408/CDKL5/transcript:ENST00000470121/transcript:ENST00000544041
BP	GO:0048632	negative regulation of skeletal muscle tissue growth	0.0046 (9/1936)	0.0022 (70/31285)	0.0159708	0.921702	9	INHBE/transcript:ENST00000483364/BMP6/C1S/TNFAIP6/C1R/transcript:ENST00000443875/INHBA	CSMD3
BP	GO:0070814	hydrogen sulfide biosynthetic process	0.0021 (4/1936)	0.0006 (18/31285)	0.0160105	0.921702	4	CBSL/transcript:ENST00000361660/CBS/CTH
MF	GO:0031732	CCR7 chemokine receptor binding	0.0021 (4/1936)	0.0006 (18/31285)	0.0160105	0.921702	4	CCL8/CCL7/CCL20/CCL3
BP	GO:0019050	obsolete suppression by virus of host apoptotic process	0.0021 (4/1936)	0.0006 (18/31285)	0.0160105	0.921702	4	SERPINB2/SERPING1/IRF8/RRM1
MF	GO:0106363	protein-cysteine methyltransferase activity	0.0031 (6/1936)	0.0012 (37/31285)	0.0160534	0.921702	6	transcript:ENST00000558084/transcript:ENST00000413704/transcript:ENST00000445387	transcript:ENST00000465045/transcript:ENST00000334884/KMT2C
BP	GO:0006983	ER overload response	0.0031 (6/1936)	0.0012 (37/31285)	0.0160534	0.921702	6	transcript:ENST00000476143/DDIT3/ANKRD45/PPP1R15A	transcript:ENST00000453535/transcript:ENST00000552635
BP	GO:0071222	cellular response to lipopolysaccharide	0.0687 (133/1936)	0.0633 (1979/31285)	0.0165502	0.941075	133	ADAMTS14/transcript:ENST00000483665/CARD16/SLC7A5/CXCL3/UNC5B/OSCAR/IL24/LRRK1/ADAP2/BTK/CCL8/IRF8/CYP27B1/IL1RN/CD300C/TLR4/MMP12/GPR35/GBP5/CMPK2/transcript:ENST00000539881/IL1A/KRT81/IRF9/MERTK/transcript:ENST00000593532/transcript:ENST00000600806/SLC12A7/CCL20/EBI3/transcript:ENST00000538239/VDR/NR1I3/CSF3/CDIP1/CCR5/transcript:ENST00000498765/LILRA6/transcript:ENST00000452281/KRT75/CXCL5/HCK…	BORCS8-MEF2B/transcript:ENST00000526491/transcript:ENST00000586995/CHODL/MAP2K3/TICAM2/CD300LB/transcript:ENST00000335760/ITK/BBS4/transcript:ENST00000561139/TMTC2/SYNGAP1/transcript:ENST00000270361/transcript:ENST00000392995/ANKRD23/PDE3A/transcript:ENST00000571451/transcript:ENST00000542140/BCL2L2-PABPN1/transcript:ENST00000468065/transcript:ENST00000552309/PDE11A/FCGR2A/transcript:ENST00000504…
BP	GO:0019752	carboxylic acid metabolic process	0.0041 (8/1936)	0.0019 (59/31285)	0.016692	0.941075	8	IL1RN/GAD1/transcript:ENST00000545215/IL1B	transcript:ENST00000422591/LDHA/transcript:ENST00000396196/transcript:ENST00000493875
BP	GO:0042832	defense response to protozoan	0.0114 (22/1936)	0.0077 (241/31285)	0.0171828	0.941075	22	EBI3/IL6/IRF7/CXCL3/CSF2RB/IRF5/IL12A/IRF8/GBP5/CLEC12A/CXCL5/CD36/CXCL2/transcript:ENST00000533182/BATF2/WDFY4/TLR2/GBP4/IRF9/CXCL8	transcript:ENST00000530726/transcript:ENST00000513998
BP	GO:0035076	ecdysone receptor signaling pathway	0.0046 (9/1936)	0.0023 (71/31285)	0.0174077	0.941075	9	NR4A1/NR1I3/VDR/transcript:ENST00000593532/transcript:ENST00000445387/SLCO1B3/SLCO2B1	transcript:ENST00000431180/KMT2C
BP	GO:0007378	amnioserosa formation	0.0046 (9/1936)	0.0023 (71/31285)	0.0174077	0.941075	9	INHBE/transcript:ENST00000583147/GDF15/transcript:ENST00000483364/BMP6/TNFAIP6/C1R/transcript:ENST00000443875	CSMD3
CC	GO:1902912	pyruvate kinase complex	0.0010 (2/1936)	0.0001 (4/31285)	0.0174717	0.941075	2	transcript:ENST00000569857/transcript:ENST00000567118
MF	GO:0099615	(D)-2-hydroxyglutarate-pyruvate transhydrogenase activity	0.0010 (2/1936)	0.0001 (4/31285)	0.0174717	0.941075	2	transcript:ENST00000400769/transcript:ENST00000436747
MF	GO:0004122	cystathionine beta-synthase activity	0.0010 (2/1936)	0.0001 (4/31285)	0.0174717	0.941075	2	CBSL/CBS
MF	GO:0031716	calcitonin receptor binding	0.0010 (2/1936)	0.0001 (4/31285)	0.0174717	0.941075	2	IAPP/CALCB
BP	GO:1902346	meiotic strand displacement involved in double-strand break repair via SDSA	0.0010 (2/1936)	0.0001 (4/31285)	0.0174717	0.941075	2	DHX58/IFIH1
MF	GO:0000215	tRNA 2'-phosphotransferase activity	0.0010 (2/1936)	0.0001 (4/31285)	0.0174717	0.941075	2	NT5C3A	transcript:ENST00000456458
MF	GO:0004743	pyruvate kinase activity	0.0010 (2/1936)	0.0001 (4/31285)	0.0174717	0.941075	2	transcript:ENST00000569857/transcript:ENST00000567118
BP	GO:0019499	cyanide metabolic process	0.0010 (2/1936)	0.0001 (4/31285)	0.0174717	0.941075	2	CBSL/CBS
BP	GO:0001984	artery vasodilation involved in baroreceptor response to increased systemic arterial blood pressure	0.0010 (2/1936)	0.0001 (4/31285)	0.0174717	0.941075	2	IAPP/CALCB
MF	GO:0032559	adenyl ribonucleotide binding	0.0010 (2/1936)	0.0001 (4/31285)	0.0174717	0.941075	2	DHX58/IFIH1
BP	GO:0010213	non-photoreactive DNA repair	0.0010 (2/1936)	0.0001 (4/31285)	0.0174717	0.941075	2	BIVM-ERCC5	ERCC5
BP	GO:0060543	negative regulation of strand invasion	0.0010 (2/1936)	0.0001 (4/31285)	0.0174717	0.941075	2	DHX58/IFIH1
CC	GO:0097361	cytosolic [4Fe-4S] assembly targeting complex	0.0052 (10/1936)	0.0027 (83/31285)	0.017541	0.941075	10	transcript:ENST00000374611/transcript:ENST00000559705/transcript:ENST00000512970/transcript:ENST00000513439/transcript:ENST00000581795/transcript:ENST00000616321/transcript:ENST00000565425	transcript:ENST00000441194/transcript:ENST00000539560/transcript:ENST00000582907
BP	GO:0032816	positive regulation of natural killer cell activation	0.0052 (10/1936)	0.0027 (83/31285)	0.017541	0.941075	10	EBI3/TYROBP/RASGRP3/IL12A/HLA-F/ULBP1/HLA-C/WDFY4	transcript:ENST00000567523/TICAM2
BP	GO:0033280	response to vitamin D	0.0160 (31/1936)	0.0119 (371/31285)	0.0179205	0.941075	31	transcript:ENST00000538239/NR1I3/VDR/RASGRP3/transcript:ENST00000635811/PTGS2/RP11-385D13.1/ESR1/ROS1/RPS6KA2/INHBA/CYP27B1/IL1RN/NR4A1/STC2/GDF15/BMP6/PLA2G4B/CD4/transcript:ENST00000587339/NEFM/C8orf44-SGK3/INHBE/MERTK/transcript:ENST00000593532/IL1B	transcript:ENST00000565875/SYTL5/transcript:ENST00000461221/RP11-47I22.4/JMJD7-PLA2G4B
BP	GO:1903980	positive regulation of microglial cell activation	0.0062 (12/1936)	0.0035 (108/31285)	0.0179415	0.941075	12	transcript:ENST00000269361/LRRK1/CD300C/CTSZ/MMP9/MMP12/KCNN3/STAP2/CCL8/CCL7/CCL3/MMP3
CC	GO:0022627	cytosolic small ribosomal subunit	0.0083 (16/1936)	0.0051 (160/31285)	0.0180171	0.941075	16	transcript:ENST00000572008/ISG15/transcript:ENST00000465407/ABCA10/ABCA5/RP11-385D13.1/transcript:ENST00000504325/transcript:ENST00000511473/RP11-1035H13.3	transcript:ENST00000532746/transcript:ENST00000586995/transcript:ENST00000530170/transcript:ENST00000574723/transcript:ENST00000503494/transcript:ENST00000569365/transcript:ENST00000530721
BP	GO:0038154	interleukin-11-mediated signaling pathway	0.0031 (6/1936)	0.0012 (38/31285)	0.0181837	0.941075	6	EBI3/transcript:ENST00000452281/STAT1/IL11	PRLR/LEPR
BP	GO:0033673	negative regulation of kinase activity	0.0031 (6/1936)	0.0012 (38/31285)	0.0181837	0.941075	6	INHBE/INHBA	transcript:ENST00000475997/transcript:ENST00000451194/transcript:ENST00000433381/transcript:ENST00000418825
CC	GO:0020011	apicoplast	0.0031 (6/1936)	0.0012 (38/31285)	0.0181837	0.941075	6	transcript:ENST00000553837/transcript:ENST00000565012/transcript:ENST00000557433/transcript:ENST00000474308/transcript:ENST00000569820	transcript:ENST00000527688
BP	GO:0042542	response to hydrogen peroxide	0.0449 (87/1936)	0.0396 (1239/31285)	0.0182505	0.941075	87	transcript:ENST00000496808/C1R/transcript:ENST00000594759/MYO1F/ECM2/transcript:ENST00000478046/BTK/CYP27B1/BRSK2/MMP12/ATF3/transcript:ENST00000626154/transcript:ENST00000425141/transcript:ENST00000523214/MYO15B/COL9A2/PTX3/transcript:ENST00000545215/TRPA1/SSH3/transcript:ENST00000601091/transcript:ENST00000452281/HCK/DDIT3/transcript:ENST00000529473/DUSP1/C1QA/transcript:ENST00000556575/HERC6/F…	CDK15/SLC4A4/transcript:ENST00000532881/NOSTRIN/RP11-47I22.4/transcript:ENST00000526491/JMJD7-PLA2G4B/MAP2K3/transcript:ENST00000515800/transcript:ENST00000536532/ITK/transcript:ENST00000527688/SLC9A7/KCNA7/transcript:ENST00000382240/transcript:ENST00000270361/SLC4A3/transcript:ENST00000493875/CDKL5/LDHA/PDE3A/transcript:ENST00000566631/transcript:ENST00000555408/BCL2L2-PABPN1/COL17A1/transcript:…
MF	GO:0004520	DNA endonuclease activity	0.0041 (8/1936)	0.0019 (60/31285)	0.0183424	0.941075	8	BIVM-ERCC5/N4BP2/DFFB	ERCC5/transcript:ENST00000491998/transcript:ENST00000530170/transcript:ENST00000511480/transcript:ENST00000530721
BP	GO:0060333	type II interferon-mediated signaling pathway	0.0072 (14/1936)	0.0043 (134/31285)	0.0183641	0.941075	14	transcript:ENST00000497784/SLA/transcript:ENST00000452281/transcript:ENST00000527170/IRF9/IRF7/BTK/HCK/IL20RB/IRF5/STAT1/transcript:ENST00000533182/IRF8	ITK
BP	GO:1905520	positive regulation of presynaptic active zone assembly	0.0026 (5/1936)	0.0009 (28/31285)	0.0184015	0.941075	5	CES1/CES3/transcript:ENST00000554738	transcript:ENST00000482958/NRXN3
BP	GO:0090125	cell-cell adhesion involved in synapse maturation	0.0026 (5/1936)	0.0009 (28/31285)	0.0184015	0.941075	5	CES1/CES3/transcript:ENST00000554738	transcript:ENST00000482958/NRXN3
BP	GO:0140206	dipeptide import across plasma membrane	0.0026 (5/1936)	0.0009 (28/31285)	0.0184015	0.941075	5	SLC7A11/SLC7A5/transcript:ENST00000541505/SLC15A3/SLC7A7
CC	GO:0005885	Arp2/3 protein complex	0.0026 (5/1936)	0.0009 (28/31285)	0.0184015	0.941075	5	transcript:ENST00000417500	transcript:ENST00000440787/transcript:ENST00000441989/transcript:ENST00000414983/transcript:ENST00000420201
CC	GO:0019907	cyclin-dependent protein kinase activating kinase holoenzyme complex	0.0026 (5/1936)	0.0009 (28/31285)	0.0184015	0.941075	5	CDKL3	transcript:ENST00000453535/CDKL5/transcript:ENST00000510106/transcript:ENST00000484049
MF	GO:1990446	U1 snRNP binding	0.0057 (11/1936)	0.0031 (96/31285)	0.0185661	0.941075	11	transcript:ENST00000507392/transcript:ENST00000502762/RBM39/transcript:ENST00000401730/transcript:ENST00000475126/transcript:ENST00000514671	transcript:ENST00000429968/transcript:ENST00000439775/transcript:ENST00000338163/transcript:ENST00000601065/transcript:ENST00000630114
BP	GO:0010744	positive regulation of macrophage derived foam cell differentiation	0.0114 (22/1936)	0.0078 (243/31285)	0.018712	0.941075	22	CSF2/ALOX5/CD163/transcript:ENST00000588198/CXCL3/PNLIPRP3/RPS6KA2/FPR3/transcript:ENST00000587251/CXCL5/CD36/CXCL2/CMKLR1/C8orf44-SGK3/ALOXE3/GPR1/C1QA/CXCR4/CXCL8/C5AR1	RP11-47I22.4/CD6
MF	GO:0140946	histone H3K4 dimethyltransferase activity	0.0036 (7/1936)	0.0016 (49/31285)	0.0187548	0.941075	7	transcript:ENST00000558084/transcript:ENST00000445387/transcript:ENST00000312087	transcript:ENST00000353275/transcript:ENST00000431180/KMT2C/transcript:ENST00000441123
CC	GO:0016533	protein kinase 5 complex	0.0036 (7/1936)	0.0016 (49/31285)	0.0187548	0.941075	7	CDKL3/CDK18	transcript:ENST00000555408/CDKL5/transcript:ENST00000510106/transcript:ENST00000566631/CDK15
BP	GO:0150038	postsynaptic dense core vesicle exocytosis	0.0036 (7/1936)	0.0016 (49/31285)	0.0187548	0.941075	7	SYTL1/SYT7/PLA2G4B/UNC13D	JMJD7-PLA2G4B/SYTL2/SYTL5
BP	GO:1903573	negative regulation of response to endoplasmic reticulum stress	0.0036 (7/1936)	0.0016 (49/31285)	0.0187548	0.941075	7	NR1I3/ALOX5/VDR/ALOXE3/transcript:ENST00000593532/PPP1R15A/MBOAT7
CC	GO:0097123	cyclin A1-CDK2 complex	0.0046 (9/1936)	0.0023 (72/31285)	0.0189364	0.941075	9	CDKL3/CCNO/CDK18/ERN1	transcript:ENST00000453535/transcript:ENST00000555408/CDKL5/transcript:ENST00000566631/CDK15
MF	GO:0045340	mercury ion binding	0.0046 (9/1936)	0.0023 (72/31285)	0.0189364	0.941075	9	MMP9/transcript:ENST00000543984/transcript:ENST00000474308/transcript:ENST00000489775/GPX3/PLSCR1/P2RX7/MRC1	transcript:ENST00000527688
MF	GO:0043047	single-stranded telomeric DNA binding	0.0052 (10/1936)	0.0027 (84/31285)	0.0189437	0.941075	10	transcript:ENST00000609106/transcript:ENST00000607932/RBM39/transcript:ENST00000502762/gene:ENSG00000255663/transcript:ENST00000514671	transcript:ENST00000533482/transcript:ENST00000542140/transcript:ENST00000338163/transcript:ENST00000630114
MF	GO:0004876	complement component C3a receptor activity	0.0021 (4/1936)	0.0006 (19/31285)	0.0193985	0.941075	4	C5AR1/FPR3/GPR1/CMKLR1
BP	GO:0006206	pyrimidine nucleobase metabolic process	0.0021 (4/1936)	0.0006 (19/31285)	0.0193985	0.941075	4	TYMP/RRM1	transcript:ENST00000532170/transcript:ENST00000533349
BP	GO:0070120	ciliary neurotrophic factor-mediated signaling pathway	0.0021 (4/1936)	0.0006 (19/31285)	0.0193985	0.941075	4	EBI3	PRLR/CNTF/LEPR
MF	GO:0035100	ecdysone binding	0.0021 (4/1936)	0.0006 (19/31285)	0.0193985	0.941075	4	NR4A1/NR1I3/VDR/transcript:ENST00000593532
MF	GO:0010428	methyl-CpNpG binding	0.0021 (4/1936)	0.0006 (19/31285)	0.0193985	0.941075	4	transcript:ENST00000507218	transcript:ENST00000413809/transcript:ENST00000468435/transcript:ENST00000503703
BP	GO:1903237	negative regulation of leukocyte tethering or rolling	0.0021 (4/1936)	0.0006 (19/31285)	0.0193985	0.941075	4	CCL8/CCL7/CCL20/CCL3
BP	GO:0051096	positive regulation of helicase activity	0.0021 (4/1936)	0.0006 (19/31285)	0.0193985	0.941075	4	transcript:ENST00000609106/transcript:ENST00000607932/transcript:ENST00000312087	transcript:ENST00000353275
BP	GO:1904274	tricellular tight junction assembly	0.0021 (4/1936)	0.0006 (19/31285)	0.0193985	0.941075	4	CD163/transcript:ENST00000588198/transcript:ENST00000587251	CD6
BP	GO:1905412	negative regulation of mitotic cohesin loading	0.0021 (4/1936)	0.0006 (19/31285)	0.0193985	0.941075	4	CDK18	transcript:ENST00000566631/CDK15/transcript:ENST00000555408
CC	GO:0005638	lamin filament	0.0021 (4/1936)	0.0006 (19/31285)	0.0193985	0.941075	4	transcript:ENST00000581795/transcript:ENST00000374611/transcript:ENST00000565425	transcript:ENST00000582907
MF	GO:0008353	RNA polymerase II CTD heptapeptide repeat kinase activity	0.0088 (17/1936)	0.0056 (175/31285)	0.0195511	0.941075	17	transcript:ENST00000409403/CDK18/CDKL3/CCNL1/transcript:ENST00000495733/transcript:ENST00000482914/transcript:ENST00000496808/transcript:ENST00000488340/ERN1	transcript:ENST00000453535/transcript:ENST00000555408/CDKL5/transcript:ENST00000510106/transcript:ENST00000470121/transcript:ENST00000566631/transcript:ENST00000544041/CDK15
BP	GO:0034612	response to tumor necrosis factor	0.0196 (38/1936)	0.0153 (478/31285)	0.0198307	0.941075	38	SMPDL3B/PTGS2/CD14/TUBA8/ROS1/NGF/CCL3/MMP9/SLC22A14/RPS6KA2/CCL8/transcript:ENST00000470316/MRC1/C2/MMP12/ADAMTS5/CXCL16/transcript:ENST00000534405/CCL7/transcript:ENST00000529473/MMP3/C8orf44-SGK3/MERTK/C1QA/C1QB/transcript:ENST00000556575/C1QC	transcript:ENST00000472940/CSMD3/SMPD1/RP11-47I22.4/transcript:ENST00000533123/transcript:ENST00000526491/transcript:ENST00000382240/transcript:ENST00000531303/transcript:ENST00000468065/MAP2K3/transcript:ENST00000544041
BP	GO:0042119	neutrophil activation	0.0139 (27/1936)	0.0101 (316/31285)	0.0200237	0.941075	27	transcript:ENST00000483665/RASGRP3/LILRB2/IL1RL1/CXCL3/CCL3/CCL8/LILRA6/IL18R1/transcript:ENST00000413704/CXCL5/transcript:ENST00000431285/CXCL2/FCGR1A/CCL7/LILRB4/C8orf44-SGK3/LILRA5/transcript:ENST00000610164/CXCR4/CXCL8/transcript:ENST00000512070	transcript:ENST00000334884/RP11-47I22.4/transcript:ENST00000560014/gene:ENSG00000273167/FCGR2A
BP	GO:2000373	positive regulation of DNA topoisomerase (ATP-hydrolyzing) activity	0.0041 (8/1936)	0.0019 (61/31285)	0.0201064	0.941075	8	transcript:ENST00000534320/transcript:ENST00000489775/transcript:ENST00000445387/PLSCR1	transcript:ENST00000425046/transcript:ENST00000475997/transcript:ENST00000413809/transcript:ENST00000468435
BP	GO:0071639	positive regulation of monocyte chemotactic protein-1 production	0.0098 (19/1936)	0.0065 (203/31285)	0.0201995	0.941075	19	transcript:ENST00000443687/MSC/IL1RN/CLEC12A/OAS3/transcript:ENST00000539881/LGALS9/OAS2/OAS1/SLAMF7/SELENOK/C1QA/C1QB/C1QC/IL1B	transcript:ENST00000515800/transcript:ENST00000571451/transcript:ENST00000488746/TRPV3
BP	GO:0043330	response to exogenous dsRNA	0.0108 (21/1936)	0.0074 (231/31285)	0.0203843	0.941075	21	MX2/IRF7/transcript:ENST00000496808/CARD9/IFIH1/IRF5/DHX58/IRAK3/IRF8/KCNJ3/transcript:ENST00000452281/TLR4/STAT1/transcript:ENST00000533182/transcript:ENST00000539881/IRF9/MX1/SLC3A2	transcript:ENST00000571451/transcript:ENST00000382240/TICAM2
BP	GO:0002316	follicular B cell differentiation	0.0052 (10/1936)	0.0027 (85/31285)	0.0204268	0.941075	10	transcript:ENST00000483665/EHF/transcript:ENST00000533182/IRF9/IRF7/IRF5/FCGR1A/IRF8	FCGR2A/ELF5
BP	GO:0002164	larval development	0.0052 (10/1936)	0.0027 (85/31285)	0.0204268	0.941075	10	NR1I3/VDR/MMP12/transcript:ENST00000593532/transcript:ENST00000487078/SLCO1B3/SLCO2B1/MMP3	transcript:ENST00000506734/AGBL5
BP	GO:0097151	positive regulation of inhibitory postsynaptic potential	0.0052 (10/1936)	0.0027 (85/31285)	0.0204268	0.941075	10	CES1/transcript:ENST00000460679/RASGRP3/SYTL1/CES3/UNC13D	transcript:ENST00000482958/SYTL2/NCAM2/SYTL5
BP	GO:2001199	negative regulation of dendritic cell differentiation	0.0062 (12/1936)	0.0035 (110/31285)	0.0204543	0.941075	12	TMEM176B/LILRA5/transcript:ENST00000483665/LILRB2/LILRB4/HLA-F/FCGR1A/HLA-C/LILRA6/OSCAR	FCGR2A/transcript:ENST00000503703
BP	GO:2000872	positive regulation of progesterone secretion	0.0031 (6/1936)	0.0012 (39/31285)	0.0204995	0.941075	6	INHBE/GDF15/transcript:ENST00000357390/RUNX3/BMP6/INHBA
BP	GO:2000515	negative regulation of CD4-positive, alpha-beta T cell activation	0.0031 (6/1936)	0.0012 (39/31285)	0.0204995	0.941075	6	LILRA5/transcript:ENST00000583147/LILRB2/LILRA6/LILRB4/OSCAR
BP	GO:0006702	androgen biosynthetic process	0.0031 (6/1936)	0.0012 (39/31285)	0.0204995	0.941075	6	SRD5A2/CYP1A1/CD36/transcript:ENST00000577831	DHRS9/RDH5
BP	GO:0034250	positive regulation of amide metabolic process	0.0031 (6/1936)	0.0012 (39/31285)	0.0204995	0.941075	6	TNF/transcript:ENST00000504325/transcript:ENST00000511473/WDFY4	transcript:ENST00000485036/transcript:ENST00000503494
MF	GO:0008253	5'-nucleotidase activity	0.0031 (6/1936)	0.0012 (39/31285)	0.0204995	0.941075	6	NT5C3A/transcript:ENST00000452156	transcript:ENST00000531547/transcript:ENST00000456458/ACPP/transcript:ENST00000580758
MF	GO:0042379	chemokine receptor binding	0.0031 (6/1936)	0.0012 (39/31285)	0.0204995	0.941075	6	CCR5/CCL20/CXCL16/CCL8/CCL7/CCL3
BP	GO:1902850	microtubule cytoskeleton organization involved in mitosis	0.0072 (14/1936)	0.0043 (136/31285)	0.0206215	0.941075	14	CDKL3/AURKC/transcript:ENST00000618568/transcript:ENST00000445387/RRAD/CDK18/transcript:ENST00000551092	transcript:ENST00000431180/transcript:ENST00000555408/CDKL5/transcript:ENST00000334884/KMT2C/transcript:ENST00000566631/CDK15
BP	GO:0033026	negative regulation of mast cell apoptotic process	0.0015 (3/1936)	0.0004 (11/31285)	0.0206742	0.941075	3	FCER1G/transcript:ENST00000452281/STAT1
BP	GO:0006240	dCDP biosynthetic process	0.0015 (3/1936)	0.0004 (11/31285)	0.0206742	0.941075	3	RRM1	transcript:ENST00000532170/transcript:ENST00000533349
MF	GO:0035594	ganglioside binding	0.0015 (3/1936)	0.0004 (11/31285)	0.0206742	0.941075	3	transcript:ENST00000434055	DCTN1/transcript:ENST00000415891
BP	GO:0070903	mitochondrial tRNA thio-modification	0.0015 (3/1936)	0.0004 (11/31285)	0.0206742	0.941075	3	gene:ENSG00000272897/transcript:ENST00000457572	transcript:ENST00000441818
BP	GO:2000038	regulation of stomatal complex development	0.0015 (3/1936)	0.0004 (11/31285)	0.0206742	0.941075	3	LRRC2/IRAK3	transcript:ENST00000568004
BP	GO:0044272	sulfur compound biosynthetic process	0.0015 (3/1936)	0.0004 (11/31285)	0.0206742	0.941075	3	CBSL/CBS	transcript:ENST00000422591
CC	GO:0061474	phagolysosome membrane	0.0036 (7/1936)	0.0016 (50/31285)	0.0207849	0.943509	7	MPEG1/WDR78/DNAH12/KIAA1033	transcript:ENST00000535501/transcript:ENST00000550053/DYNC1I1
CC	GO:0042788	obsolete polysomal ribosome	0.0093 (18/1936)	0.0061 (190/31285)	0.0209166	0.946878	18	transcript:ENST00000572008/RP11-385D13.1/transcript:ENST00000504325/transcript:ENST00000557087/transcript:ENST00000549370/RP11-1035H13.3/transcript:ENST00000547173	transcript:ENST00000529920/transcript:ENST00000532746/transcript:ENST00000503494/RPL36A-HNRNPH2/transcript:ENST00000522800/transcript:ENST00000530170/transcript:ENST00000547475/transcript:ENST00000530721/gene:ENSG00000263809/transcript:ENST00000574723/transcript:ENST00000569365
BP	GO:0043936	asexual sporulation resulting in formation of a cellular spore	0.0026 (5/1936)	0.0009 (29/31285)	0.0212355	0.95606	5	transcript:ENST00000541960/transcript:ENST00000570856/PTGS2/transcript:ENST00000540424/HAS1
BP	GO:0006545	glycine biosynthetic process	0.0026 (5/1936)	0.0009 (29/31285)	0.0212355	0.95606	5	transcript:ENST00000557348/transcript:ENST00000553837/transcript:ENST00000557433/transcript:ENST00000555563	transcript:ENST00000556825
BP	GO:2001240	negative regulation of extrinsic apoptotic signaling pathway in absence of ligand	0.0170 (33/1936)	0.0130 (406/31285)	0.0214637	0.963703	33	CSF2/TNF/transcript:ENST00000496808/CXCL3/UNC5B/ADAP2/BTK/RPS6KA2/transcript:ENST00000521724/CCL8/IL1RN/IFI6/CXCL5/IFI27/HCK/CXCL2/ADAP1/CCL7/C8orf44-SGK3/SLA/IL1A/CXCL8/transcript:ENST00000556575/COL9A2/IL1B/transcript:ENST00000465115	ITK/COL13A1/RP11-47I22.4/BCL2L2-PABPN1/EYA1/COL17A1/MAP2K3
BP	GO:0070102	interleukin-6-mediated signaling pathway	0.0088 (17/1936)	0.0057 (177/31285)	0.0215892	0.966704	17	SLA/transcript:ENST00000452281/LRRK1/EHF/IL6/SH2D3C/BTK/HCK/CEBPD/STAT1/ROS1/transcript:ENST00000496634	PRLR/transcript:ENST00000611848/LEPR/ELF5/ITK
CC	GO:0000806	Y chromosome	0.0041 (8/1936)	0.0020 (62/31285)	0.0219876	0.973481	8	CDKL3/CDK18/ERN1	transcript:ENST00000453535/transcript:ENST00000555408/CDKL5/transcript:ENST00000566631/CDK15
BP	GO:0032328	alanine transport	0.0041 (8/1936)	0.0020 (62/31285)	0.0219876	0.973481	8	SLC7A11/SLC6A9/SLC7A7/SLC7A5	transcript:ENST00000566598/SLC38A6/transcript:ENST00000549258/SLC38A4
CC	GO:0097124	cyclin A2-CDK2 complex	0.0046 (9/1936)	0.0024 (74/31285)	0.0222816	0.973481	9	CDKL3/CCNO/CDK18/ERN1	transcript:ENST00000453535/transcript:ENST00000555408/CDKL5/transcript:ENST00000566631/CDK15
BP	GO:2000144	positive regulation of DNA-templated transcription initiation	0.0046 (9/1936)	0.0024 (74/31285)	0.0222816	0.973481	9	transcript:ENST00000424354/MSC/TFEC/HELZ2/ATF3/CEBPD/transcript:ENST00000443687/transcript:ENST00000534269	transcript:ENST00000527613
BP	GO:1901387	positive regulation of voltage-gated calcium channel activity	0.0046 (9/1936)	0.0024 (74/31285)	0.0222816	0.973481	9	CDKL3/CDK18/transcript:ENST00000495564	transcript:ENST00000555408/CDKL5/transcript:ENST00000510106/gene:ENSG00000273167/transcript:ENST00000566631/CDK15
BP	GO:0044655	phagosome reneutralization	0.0036 (7/1936)	0.0016 (51/31285)	0.0229628	0.973481	7	MYO15B/MYO1G/CD36/KIAA1033/MYO1F	transcript:ENST00000535501/transcript:ENST00000550053
BP	GO:0002418	immune response to tumor cell	0.0036 (7/1936)	0.0016 (51/31285)	0.0229628	0.973481	7	ADAMTS5/HLA-C/HLA-F/ULBP1/transcript:ENST00000529473	transcript:ENST00000468065/transcript:ENST00000526491
BP	GO:0042407	cristae formation	0.0031 (6/1936)	0.0013 (40/31285)	0.0230073	0.973481	6	transcript:ENST00000463057/transcript:ENST00000615986/transcript:ENST00000504594/transcript:ENST00000569820	transcript:ENST00000490078/transcript:ENST00000409258
BP	GO:1900753	doxorubicin transport	0.0031 (6/1936)	0.0013 (40/31285)	0.0230073	0.973481	6	ARHGAP40/ARHGAP30/ABCA5/ABCA10/transcript:ENST00000495242	transcript:ENST00000586995
BP	GO:0006807	obsolete nitrogen compound metabolic process	0.0103 (20/1936)	0.0070 (220/31285)	0.0231848	0.973481	20	FLT1/MYO1G/transcript:ENST00000421364/SCHIP1/MYO1F/transcript:ENST00000436747/transcript:ENST00000520579/ABHD14A-ACY1/transcript:ENST00000400769/transcript:ENST00000480073/PARP9/transcript:ENST00000541505/MYO15B/ALDH1A1/PSTPIP1/SLC15A3	NOSTRIN/IQCJ-SCHIP1/transcript:ENST00000513998/transcript:ENST00000504875
MF	GO:0140952	histone H3K27 dimethyltransferase activity	0.0021 (4/1936)	0.0006 (20/31285)	0.0231965	0.973481	4	transcript:ENST00000445387/transcript:ENST00000312087	transcript:ENST00000353275/transcript:ENST00000431180
BP	GO:2000436	positive regulation of protein neddylation	0.0021 (4/1936)	0.0006 (20/31285)	0.0231965	0.973481	4	transcript:ENST00000531571/transcript:ENST00000527779	transcript:ENST00000477560/transcript:ENST00000509376
MF	GO:0032182	ubiquitin-like protein binding	0.0021 (4/1936)	0.0006 (20/31285)	0.0231965	0.973481	4	transcript:ENST00000531571/transcript:ENST00000527779	transcript:ENST00000477560/transcript:ENST00000509376
BP	GO:0009263	deoxyribonucleotide biosynthetic process	0.0021 (4/1936)	0.0006 (20/31285)	0.0231965	0.973481	4	TMX2/RRM1	transcript:ENST00000532170/transcript:ENST00000533349
BP	GO:0009944	polarity specification of adaxial/abaxial axis	0.0021 (4/1936)	0.0006 (20/31285)	0.0231965	0.973481	4	IRAK3/IFIH1/DHX58	transcript:ENST00000568004
BP	GO:0001909	leukocyte mediated cytotoxicity	0.0021 (4/1936)	0.0006 (20/31285)	0.0231965	0.973481	4	gene:ENSG00000268400/NCF4/NCF1/PSTPIP1
BP	GO:0051122	hepoxilin biosynthetic process	0.0021 (4/1936)	0.0006 (20/31285)	0.0231965	0.973481	4	transcript:ENST00000498765/ALOXE3/ALOX5/GSTM3
CC	GO:0005801	cis-Golgi network	0.0145 (28/1936)	0.0107 (335/31285)	0.0234264	0.973481	28	ATP11A/RP11-468E2.1/transcript:ENST00000555873/transcript:ENST00000311943/transcript:ENST00000555259/transcript:ENST00000558161/gene:ENSG00000268975/transcript:ENST00000560451/gene:ENSG00000268400/transcript:ENST00000431601/transcript:ENST00000536606/RAB33A/transcript:ENST00000532585/transcript:ENST00000422875/transcript:ENST00000435201/transcript:ENST00000442798/transcript:ENST00000529332	transcript:ENST00000482512/transcript:ENST00000561419/GOLGA8O/transcript:ENST00000436958/transcript:ENST00000426902/gene:ENSG00000262633/transcript:ENST00000452389/transcript:ENST00000427274/transcript:ENST00000515119/ATP8A1/transcript:ENST00000539025
MF	GO:0008289	lipid binding	0.0548 (106/1936)	0.0499 (1561/31285)	0.0234523	0.973481	106	MX2/transcript:ENST00000454552/TRIB3/ARHGAP40/transcript:ENST00000591662/MYO1F/LRRK1/RARRES3/transcript:ENST00000478046/transcript:ENST00000523864/BTK/ERN1/BRSK2/transcript:ENST00000626154/transcript:ENST00000533523/transcript:ENST00000507302/MYO15B/transcript:ENST00000593532/transcript:ENST00000502762/transcript:ENST00000512070/CALCB/MTTP/transcript:ENST00000514671/NR1I3/VDR/APOL1/transcript:ENS…	transcript:ENST00000534843/SYTL5/CLIC2/NOSTRIN/RP11-47I22.4/transcript:ENST00000528594/SYTL2/JMJD7-PLA2G4B/transcript:ENST00000422426/transcript:ENST00000455843/transcript:ENST00000439080/ITK/transcript:ENST00000478631/transcript:ENST00000560014/ECI2/RP11-20I23.1/gene:ENSG00000273167/transcript:ENST00000600677/TRPV3/CSMD3/transcript:ENST00000559133/transcript:ENST00000432700/PRLR/transcript:ENST0…
MF	GO:0008408	3'-5' exonuclease activity	0.0052 (10/1936)	0.0028 (87/31285)	0.0236442	0.973481	10	transcript:ENST00000522644/TREX2/TREX1/ISG20/EXOSC6/transcript:ENST00000513914/transcript:ENST00000631044	transcript:ENST00000325577/RAD9B/transcript:ENST00000591254
BP	GO:0033591	response to L-ascorbic acid	0.0052 (10/1936)	0.0028 (87/31285)	0.0236442	0.973481	10	IL1RN/RNF126/IL1A/C1S/transcript:ENST00000498765/C1R/IL1B/CYP27B1	BCL2L2-PABPN1/ITGA10
BP	GO:0048790	maintenance of presynaptic active zone structure	0.0088 (17/1936)	0.0057 (179/31285)	0.0237851	0.973481	17	ARHGAP40/SYTL1/SCARF1/SYT7/SPTBN5/DYSF/transcript:ENST00000512070/PSTPIP1/gene:ENSG00000259753/transcript:ENST00000495242/ARHGAP9/ERC2/transcript:ENST00000495564	transcript:ENST00000420627/SYTL2/gene:ENSG00000273167/SYTL5
BP	GO:2000553	positive regulation of T-helper 2 cell cytokine production	0.0077 (15/1936)	0.0049 (152/31285)	0.0239329	0.973481	15	DENND2D/C8orf44-SGK3/IL6/RSAD2/CCL8/CCL7/transcript:ENST00000539881/CCL20/CCL3	transcript:ENST00000294737/RP11-47I22.4/transcript:ENST00000571451/DENND2A/transcript:ENST00000508798/transcript:ENST00000530726
BP	GO:1905784	regulation of anaphase-promoting complex-dependent catabolic process	0.0041 (8/1936)	0.0020 (63/31285)	0.0239897	0.973481	8	CDKL3/CDK18/ERN1	transcript:ENST00000453535/transcript:ENST00000555408/CDKL5/transcript:ENST00000566631/CDK15
MF	GO:0003727	single-stranded RNA binding	0.0207 (40/1936)	0.0165 (515/31285)	0.0240096	0.973481	40	IFIT1/NR1I3/transcript:ENST00000492414/transcript:ENST00000482936/DDX3Y/ESRP1/ESRP2/transcript:ENST00000407982/transcript:ENST00000475126/DDX60/ECM2/IFIT3/transcript:ENST00000445387/IFIH1/DHX58/TLR4/HELZ2/EXOSC6/RBM39/gene:ENSG00000255663/PARP9/transcript:ENST00000550704/TLR2/transcript:ENST00000593532/transcript:ENST00000502762/transcript:ENST00000514671	transcript:ENST00000590558/transcript:ENST00000431534/transcript:ENST00000522577/transcript:ENST00000630114/RTEL1/transcript:ENST00000496664/transcript:ENST00000472476/transcript:ENST00000542140/transcript:ENST00000475997/transcript:ENST00000484566/KMT2C/transcript:ENST00000338163/transcript:ENST00000413809/transcript:ENST00000439080
MF	GO:0008009	chemokine activity	0.0046 (9/1936)	0.0024 (75/31285)	0.0241039	0.973481	9	CXCL5/CXCL8/CCL20/CXCL16/CXCL3/CXCL2/CCL8/CCL7/CCL3
BP	GO:2000503	positive regulation of natural killer cell chemotaxis	0.0026 (5/1936)	0.0010 (30/31285)	0.0243389	0.973481	5	CXCL8/CCL8/CCL7/CCL20/CCL3
BP	GO:0010808	positive regulation of synaptic vesicle priming	0.0026 (5/1936)	0.0010 (30/31285)	0.0243389	0.973481	5	SYTL1/RASGRP3/UNC13D	SYTL2/SYTL5
MF	GO:0140951	histone H3K27 trimethyltransferase activity	0.0026 (5/1936)	0.0010 (30/31285)	0.0243389	0.973481	5	transcript:ENST00000445387/transcript:ENST00000312087	transcript:ENST00000353275/transcript:ENST00000431180/KMT2C
BP	GO:0006672	ceramide metabolic process	0.0072 (14/1936)	0.0044 (139/31285)	0.0243906	0.973481	14	RP11-468E2.1/SMPDL3B/transcript:ENST00000478046/ABCA5/ABCA10/SMPD3/transcript:ENST00000534405/WDFY4/transcript:ENST00000529332	transcript:ENST00000561419/transcript:ENST00000586995/transcript:ENST00000531303/SMPD1/transcript:ENST00000533123
BP	GO:0006302	double-strand break repair	0.0207 (40/1936)	0.0165 (516/31285)	0.024668	0.973481	40	transcript:ENST00000482936/transcript:ENST00000475656/transcript:ENST00000594759/DDX60/HIST1H2AG/transcript:ENST00000478046/transcript:ENST00000314088/transcript:ENST00000601091/transcript:ENST00000417588/transcript:ENST00000445387/IFIH1/EME2/REC8/DHX58/DNAJC7/transcript:ENST00000558357/transcript:ENST00000555178/HELZ2/PARP9/transcript:ENST00000554976/DTX4/transcript:ENST00000524647/transcript:EN…	transcript:ENST00000353275/transcript:ENST00000473015/transcript:ENST00000461221/transcript:ENST00000431180/transcript:ENST00000566631/RTEL1/transcript:ENST00000533482/transcript:ENST00000413697/EYA1/transcript:ENST00000522610/KMT2C/transcript:ENST00000522378/transcript:ENST00000588814/transcript:ENST00000398654/transcript:ENST00000229866
BP	GO:1900017	positive regulation of cytokine production involved in inflammatory response	0.0129 (25/1936)	0.0094 (293/31285)	0.0248325	0.973481	25	CD163/IL6/LILRB2/TNF/transcript:ENST00000494339/transcript:ENST00000588198/GPSM3/OSCAR/CARD9/transcript:ENST00000587251/LILRA6/transcript:ENST00000452281/TLR4/GBP5/CLEC12A/STAT1/transcript:ENST00000539881/LILRB4/LILRA5/TLR2/GBP4	transcript:ENST00000459912/transcript:ENST00000571451/TICAM2/CD6
BP	GO:0097011	cellular response to granulocyte macrophage colony-stimulating factor stimulus	0.0093 (18/1936)	0.0062 (194/31285)	0.025178	0.973481	18	C8orf44-SGK3/LILRA5/transcript:ENST00000452281/CSF2/FLI1/EHF/LILRB2/LILRA6/CD4/RPS6KA2/transcript:ENST00000556575/STAT1/LILRB4	PRLR/PDE3A/PDE11A/RP11-47I22.4/ELF5
MF	GO:0030348	syntaxin-3 binding	0.0036 (7/1936)	0.0017 (52/31285)	0.0252929	0.973481	7	gene:ENSG00000268400/SYTL1/SYT7/transcript:ENST00000311943/UNC13D	SYTL2/SYTL5
BP	GO:0031054	pre-miRNA processing	0.0036 (7/1936)	0.0017 (52/31285)	0.0252929	0.973481	7	PRKRA/transcript:ENST00000492414/IFIH1/transcript:ENST00000496634/DHX58	transcript:ENST00000424699/transcript:ENST00000496664
MF	GO:0031730	CCR5 chemokine receptor binding	0.0036 (7/1936)	0.0017 (52/31285)	0.0252929	0.973481	7	transcript:ENST00000452281/CXCL8/CCL20/STAT1/CCL8/CCL7/CCL3
BP	GO:0035307	obsolete positive regulation of protein dephosphorylation	0.0139 (27/1936)	0.0103 (323/31285)	0.0256321	0.973481	27	RASGRP3/SMPDL3B/LILRB2/ARHGAP40/transcript:ENST00000461311/OSCAR/ARHGAP4/transcript:ENST00000478046/transcript:ENST00000574951/transcript:ENST00000523864/transcript:ENST00000429888/transcript:ENST00000472580/transcript:ENST00000495242/LILRA6/transcript:ENST00000568890/transcript:ENST00000534405/LILRB4/C8orf44-SGK3/LILRA5	SMPD1/RP11-47I22.4/ADORA2A/transcript:ENST00000533123/CDH18/transcript:ENST00000415933/transcript:ENST00000531303/transcript:ENST00000388749
MF	GO:0016175	superoxide-generating NAD(P)H oxidase activity	0.0031 (6/1936)	0.0013 (41/31285)	0.025713	0.973481	6	NCF4/NCF1/PSTPIP1/PTGS2/transcript:ENST00000495564	EFCAB1
BP	GO:0045448	mitotic cell cycle, embryonic	0.0031 (6/1936)	0.0013 (41/31285)	0.025713	0.973481	6	FMNL3/IFIH1/DHX58	transcript:ENST00000510106/transcript:ENST00000573196/transcript:ENST00000466227
BP	GO:0030842	regulation of intermediate filament depolymerization	0.0031 (6/1936)	0.0013 (41/31285)	0.025713	0.973481	6	CDKL3/CDK18	transcript:ENST00000555408/CDKL5/transcript:ENST00000510106/CDK15
BP	GO:0070665	positive regulation of leukocyte proliferation	0.0031 (6/1936)	0.0013 (41/31285)	0.025713	0.973481	6	IL2RG/CSF2/FLT1/BST2/CSF2RB	transcript:ENST00000504875
BP	GO:0061518	microglial cell proliferation	0.0031 (6/1936)	0.0013 (41/31285)	0.025713	0.973481	6	CD300C/FLT1/CCL8/CCL7	NDP/transcript:ENST00000504875
CC	GO:1990498	mitotic spindle microtubule	0.0072 (14/1936)	0.0045 (140/31285)	0.0257541	0.973481	14	transcript:ENST00000536606/MYO15B/MYO1G/transcript:ENST00000391623/transcript:ENST00000605457/MYO1F	transcript:ENST00000591715/transcript:ENST00000617103/transcript:ENST00000333047/transcript:ENST00000564136/transcript:ENST00000475997/DCLK1/RP1/transcript:ENST00000525317
CC	GO:0005675	transcription factor TFIIH holo complex	0.0046 (9/1936)	0.0024 (76/31285)	0.0260298	0.973481	9	CDKL3/transcript:ENST00000482936	transcript:ENST00000453535/CDKL5/transcript:ENST00000510106/transcript:ENST00000484049/RTEL1/transcript:ENST00000543415/transcript:ENST00000441194
BP	GO:0055092	sterol homeostasis	0.0057 (11/1936)	0.0032 (101/31285)	0.0260439	0.973481	11	transcript:ENST00000496241/NR1I3/VDR/CH25H/transcript:ENST00000593532/transcript:ENST00000445387/ATP11A	SCD/ATP8A1/KMT2C/ECI2
BP	GO:0016243	regulation of autophagosome size	0.0041 (8/1936)	0.0020 (64/31285)	0.026116	0.973481	8	transcript:ENST00000504325/ATP11A/transcript:ENST00000511473/transcript:ENST00000636866	transcript:ENST00000637871/transcript:ENST00000568422/RP11-762I7.5/transcript:ENST00000503494
BP	GO:0038093	Fc receptor signaling pathway	0.0041 (8/1936)	0.0020 (64/31285)	0.026116	0.973481	8	LILRA5/CD300C/FLT1/LILRB2/LILRB4/LILRA6	CD300LB/transcript:ENST00000504875
MF	GO:0015194	L-serine transmembrane transporter activity	0.0041 (8/1936)	0.0020 (64/31285)	0.026116	0.973481	8	SLC7A11/SLC1A4/SLC7A7/SLC7A5	transcript:ENST00000566598/SLC38A6/transcript:ENST00000549258/SLC38A4
CC	GO:0097135	cyclin E2-CDK2 complex	0.0041 (8/1936)	0.0020 (64/31285)	0.026116	0.973481	8	CDKL3/CDK18/ERN1	transcript:ENST00000453535/transcript:ENST00000555408/CDKL5/transcript:ENST00000566631/CDK15
BP	GO:0031666	positive regulation of lipopolysaccharide-mediated signaling pathway	0.0067 (13/1936)	0.0041 (127/31285)	0.0261234	0.973481	13	C8orf44-SGK3/INHBE/RASGRP3/TLR4/GDF15/SAMSN1/BMP6/INHBA/UNC13D/CD14	SYTL2/RP11-47I22.4/SYTL5
BP	GO:0032760	positive regulation of tumor necrosis factor production	0.0424 (82/1936)	0.0377 (1179/31285)	0.0261504	0.973481	82	FCER1G/transcript:ENST00000483665/IL1RL1/CXCL3/UNC5B/OSCAR/LRRK1/CARD9/MSC/BTK/CCL8/TLR4/MMP12/GPR35/transcript:ENST00000539881/LGALS9/IL1A/C1QB/CCL20/EBI3/PNLIPRP3/CCR5/HLA-C/LILRA6/transcript:ENST00000452281/PTPRO/CXCL5/HCK/LILRB4/LILRA5/TLR2/SLAMF7/C1QA/CXCR4/CXCL8/TYROBP/FLT1/IL6/CD14/transcript:ENST00000421364/ULBP1/transcript:ENST00000558656/CCL3/DHX58/CLEC12A/OAS3/transcript:ENST0000052248…	LRRTM4/transcript:ENST00000479896/transcript:ENST00000515800/ITK/transcript:ENST00000485036/transcript:ENST00000426902/transcript:ENST00000488746/transcript:ENST00000571451/transcript:ENST00000542140/FCGR2A/transcript:ENST00000504875
MF	GO:0008139	nuclear localization sequence binding	0.0062 (12/1936)	0.0036 (114/31285)	0.0262502	0.973481	12	transcript:ENST00000494339/transcript:ENST00000502762/RBM39/IPO4/TM7SF2/gene:ENSG00000255663/transcript:ENST00000514671	transcript:ENST00000529601/transcript:ENST00000603946/transcript:ENST00000542140/transcript:ENST00000338163/transcript:ENST00000630114
BP	GO:0060690	epithelial cell differentiation involved in salivary gland development	0.0015 (3/1936)	0.0004 (12/31285)	0.0264361	0.973481	3	CTNND2/transcript:ENST00000421462/transcript:ENST00000426248
BP	GO:1902935	protein localization to septin ring	0.0015 (3/1936)	0.0004 (12/31285)	0.0264361	0.973481	3	transcript:ENST00000626154/TRIB3/BRSK2
BP	GO:0019856	pyrimidine nucleobase biosynthetic process	0.0015 (3/1936)	0.0004 (12/31285)	0.0264361	0.973481	3	transcript:ENST00000462091/transcript:ENST00000479719	transcript:ENST00000467167
BP	GO:0032484	Ral protein signal transduction	0.0015 (3/1936)	0.0004 (12/31285)	0.0264361	0.973481	3	transcript:ENST00000491638/RAP1GAP/transcript:ENST00000485789
BP	GO:0060168	positive regulation of adenosine receptor signaling pathway	0.0015 (3/1936)	0.0004 (12/31285)	0.0264361	0.973481	3	transcript:ENST00000485399	ACPP/transcript:ENST00000531547
BP	GO:1901281	fructoselysine catabolic process	0.0015 (3/1936)	0.0004 (12/31285)	0.0264361	0.973481	3	SLC7A7/SLC7A11/SLC7A5
BP	GO:0033007	negative regulation of mast cell activation involved in immune response	0.0077 (15/1936)	0.0049 (154/31285)	0.0265365	0.973481	15	LILRA5/LRRK1/CD300C/PTPRO/LILRB2/SH2D3C/LILRB4/BTK/ROS1/LILRA6	transcript:ENST00000479896/CD300LB/transcript:ENST00000515800/ITK/transcript:ENST00000513998
CC	GO:0022626	cytosolic ribosome	0.0176 (34/1936)	0.0137 (428/31285)	0.0266018	0.973481	34	gene:ENSG00000255073/transcript:ENST00000492414/transcript:ENST00000465407/RP11-385D13.1/DDX60/transcript:ENST00000538796/transcript:ENST00000547173/transcript:ENST00000549370/transcript:ENST00000572008/ISG15/transcript:ENST00000557433/RP11-1035H13.3/transcript:ENST00000534599/transcript:ENST00000553837/transcript:ENST00000504325/transcript:ENST00000511473/transcript:ENST00000557087/transcript:EN…	transcript:ENST00000529920/transcript:ENST00000565875/transcript:ENST00000532746/transcript:ENST00000530170/transcript:ENST00000530721/transcript:ENST00000547475/gene:ENSG00000263809/transcript:ENST00000496664/transcript:ENST00000569365/transcript:ENST00000574723/transcript:ENST00000461690/RPL36A-HNRNPH2/transcript:ENST00000503494/gene:ENSG00000256646
BP	GO:0010887	negative regulation of cholesterol storage	0.0052 (10/1936)	0.0028 (89/31285)	0.0272119	0.973481	10	CES1/NR1I3/CD300C/VDR/CES3/ABCA5/transcript:ENST00000593532/ABCA10	transcript:ENST00000586995/transcript:ENST00000482958
BP	GO:0002383	immune response in brain or nervous system	0.0021 (4/1936)	0.0007 (21/31285)	0.0274146	0.973481	4	TREX2/FLT1/TREX1	transcript:ENST00000504875
MF	GO:0022853	active monoatomic ion transmembrane transporter activity	0.0021 (4/1936)	0.0007 (21/31285)	0.0274146	0.973481	4	transcript:ENST00000525723	SLC38A4/transcript:ENST00000566598/SLC38A6
BP	GO:0097474	retinal cone cell apoptotic process	0.0021 (4/1936)	0.0007 (21/31285)	0.0274146	0.973481	4	transcript:ENST00000593532/NR1I3/DIO2/VDR
BP	GO:0015817	histidine transport	0.0021 (4/1936)	0.0007 (21/31285)	0.0274146	0.973481	4	transcript:ENST00000541505/SLC15A3	SLC38A4/SLC38A6
BP	GO:0038091	positive regulation of cell proliferation by VEGF-activated platelet derived growth factor receptor signaling pathway	0.0021 (4/1936)	0.0007 (21/31285)	0.0274146	0.973481	4	PGF/FLT1/transcript:ENST00000520579	transcript:ENST00000504875
BP	GO:0006882	intracellular zinc ion homeostasis	0.0103 (20/1936)	0.0072 (224/31285)	0.0274385	0.973481	20	transcript:ENST00000555840/ATP11A/RP11-468E2.1/CBWD5/BTK/MT1M/transcript:ENST00000465014/HCK/transcript:ENST00000395594/transcript:ENST00000456188/SLA/TRPM2/transcript:ENST00000621474/SLC1A4/transcript:ENST00000612045/transcript:ENST00000529332	transcript:ENST00000612050/ITK/transcript:ENST00000561419/transcript:ENST00000628474
MF	GO:0003724	RNA helicase activity	0.0119 (23/1936)	0.0085 (267/31285)	0.0276172	0.973481	23	TDRD6/transcript:ENST00000395745/DDX47/DDX3Y/transcript:ENST00000482936/DDX60/transcript:ENST00000602113/transcript:ENST00000443963/transcript:ENST00000507392/IFIH1/DHX58/HELZ2/PARP9/transcript:ENST00000574023/transcript:ENST00000463267	transcript:ENST00000577940/transcript:ENST00000441384/transcript:ENST00000533164/RTEL1/transcript:ENST00000354291/transcript:ENST00000484566/RP11-762I7.5/transcript:ENST00000509576
CC	GO:0005765	lysosomal membrane	0.0733 (142/1936)	0.0692 (2165/31285)	0.0276607	0.973481	142	RAP1GAP/SLC7A5/SESN2/transcript:ENST00000431926/MYO1F/transcript:ENST00000480292/RARRES3/BTK/ATP6V0D2/transcript:ENST00000576235/transcript:ENST00000580805/TLR4/WDR78/transcript:ENST00000541505/transcript:ENST00000533523/transcript:ENST00000589215/ATP8B3/MYO15B/DTX4/SLC12A7/transcript:ENST00000636787/transcript:ENST00000538239/SMPDL3B/TFEC/transcript:ENST00000467906/TNFAIP6/CDIP1/TRPA1/transcript…	transcript:ENST00000369635/transcript:ENST00000566598/SYTL5/transcript:ENST00000508404/CLIC2/SMPD1/transcript:ENST00000418825/transcript:ENST00000586995/SYTL2/transcript:ENST00000433381/transcript:ENST00000530726/JMJD7-PLA2G4B/SLC26A7/transcript:ENST00000497136/transcript:ENST00000578577/ITK/transcript:ENST00000561139/transcript:ENST00000458140/SLC29A2/LRRC4/transcript:ENST00000560014/transcript:…
MF	GO:0030110	HLA-C specific inhibitory MHC class I receptor activity	0.0026 (5/1936)	0.0010 (31/31285)	0.0277195	0.973481	5	LILRA5/LILRB2/LILRA6/LILRB4/OSCAR
MF	GO:0015184	L-cystine transmembrane transporter activity	0.0026 (5/1936)	0.0010 (31/31285)	0.0277195	0.973481	5	SLC7A11/SLC1A4/SLC7A5/SLC7A7/SLC3A2
BP	GO:0031349	positive regulation of defense response	0.0026 (5/1936)	0.0010 (31/31285)	0.0277195	0.973481	5	ECM2/SDS	transcript:ENST00000565875/transcript:ENST00000568004/transcript:ENST00000539560
MF	GO:0050733	RS domain binding	0.0057 (11/1936)	0.0033 (102/31285)	0.0277681	0.973481	11	ZRSR1/transcript:ENST00000502762/RBM39/transcript:ENST00000475126/transcript:ENST00000583741/transcript:ENST00000514671	transcript:ENST00000630114/transcript:ENST00000584668/transcript:ENST00000429968/transcript:ENST00000338163/transcript:ENST00000426094
BP	GO:0034352	positive regulation of glial cell apoptotic process	0.0036 (7/1936)	0.0017 (53/31285)	0.0277797	0.973481	7	CDKL3/CDK18	transcript:ENST00000555408/CDKL5/transcript:ENST00000510106/transcript:ENST00000566631/CDK15
BP	GO:0002273	plasmacytoid dendritic cell differentiation	0.0036 (7/1936)	0.0017 (53/31285)	0.0277797	0.973481	7	SLAMF7/IRF9/IRF7/IRF5/transcript:ENST00000533182/IRF8	transcript:ENST00000503703
BP	GO:1902231	positive regulation of intrinsic apoptotic signaling pathway in response to DNA damage	0.0036 (7/1936)	0.0017 (53/31285)	0.0277797	0.973481	7	PLSCR1/transcript:ENST00000507218	transcript:ENST00000398654/transcript:ENST00000530170/transcript:ENST00000503703/transcript:ENST00000530721/RAD9B
BP	GO:0080027	response to herbivore	0.0036 (7/1936)	0.0017 (53/31285)	0.0277797	0.973481	7	ECM2/ALOX5/SDS/ALOXE3	MAP2K3/transcript:ENST00000568004/transcript:ENST00000544223
BP	GO:0032815	negative regulation of natural killer cell activation	0.0077 (15/1936)	0.0050 (155/31285)	0.0279145	0.973481	15	LGALS9/LILRA5/SLA/LILRB2/ULBP1/LILRB4/BTK/HCK/RHBDD3/ROS1/HLA-F/LCP2/HLA-C/LILRA6	ITK
BP	GO:0034616	response to laminar fluid shear stress	0.0077 (15/1936)	0.0050 (155/31285)	0.0279145	0.973481	15	NCF4/FLI1/EHF/GDF15/ADAMTS5/ABCA5/ABCA10/PSTPIP1/INHBA/transcript:ENST00000529473	transcript:ENST00000586995/transcript:ENST00000611848/transcript:ENST00000468065/KLF17/transcript:ENST00000526491
BP	GO:0010660	regulation of muscle cell apoptotic process	0.0010 (2/1936)	0.0002 (5/31285)	0.0280428	0.973481	2	DHX58/IFIH1
MF	GO:0047809	D-2-hydroxy-acid dehydrogenase activity	0.0010 (2/1936)	0.0002 (5/31285)	0.0280428	0.973481	2	transcript:ENST00000400769/transcript:ENST00000436747
BP	GO:1902680	positive regulation of RNA biosynthetic process	0.0010 (2/1936)	0.0002 (5/31285)	0.0280428	0.973481	2	IL1RN/IL1B
MF	GO:0016443	obsolete bidentate ribonuclease III activity	0.0010 (2/1936)	0.0002 (5/31285)	0.0280428	0.973481	2	DHX58/IFIH1
CC	GO:0120155	MIH complex	0.0010 (2/1936)	0.0002 (5/31285)	0.0280428	0.973481	2	IQGAP2	transcript:ENST00000633485
BP	GO:0034344	regulation of type III interferon production	0.0010 (2/1936)	0.0002 (5/31285)	0.0280428	0.973481	2	DHX58/IFIH1
BP	GO:0039010	specification of pronephric distal tubule identity	0.0010 (2/1936)	0.0002 (5/31285)	0.0280428	0.973481	2	transcript:ENST00000480623	transcript:ENST00000636398
MF	GO:0048256	flap endonuclease activity	0.0010 (2/1936)	0.0002 (5/31285)	0.0280428	0.973481	2	BIVM-ERCC5	ERCC5
BP	GO:0015846	polyamine transport	0.0010 (2/1936)	0.0002 (5/31285)	0.0280428	0.973481	2	SLC7A7/SLC7A11
MF	GO:0051990	(R)-2-hydroxyglutarate dehydrogenase activity	0.0010 (2/1936)	0.0002 (5/31285)	0.0280428	0.973481	2	transcript:ENST00000400769/transcript:ENST00000436747
MF	GO:0051996	squalene synthase [NAD(P)H] activity	0.0010 (2/1936)	0.0002 (5/31285)	0.0280428	0.973481	2	transcript:ENST00000525283	transcript:ENST00000525607
MF	GO:0004310	obsolete farnesyl-diphosphate farnesyltransferase activity	0.0010 (2/1936)	0.0002 (5/31285)	0.0280428	0.973481	2	transcript:ENST00000525283	transcript:ENST00000525607
CC	GO:0009328	phenylalanine-tRNA ligase complex	0.0010 (2/1936)	0.0002 (5/31285)	0.0280428	0.973481	2	transcript:ENST00000586146	FARSA
BP	GO:0000913	preprophase band assembly	0.0010 (2/1936)	0.0002 (5/31285)	0.0280428	0.973481	2		PPP2R3C/transcript:ENST00000564136
MF	GO:0017005	3'-tyrosyl-DNA phosphodiesterase activity	0.0010 (2/1936)	0.0002 (5/31285)	0.0280428	0.973481	2	transcript:ENST00000554976/transcript:ENST00000555178
BP	GO:1904060	negative regulation of locomotor rhythm	0.0010 (2/1936)	0.0002 (5/31285)	0.0280428	0.973481	2	EBI3	LEPR
BP	GO:0060148	positive regulation of post-transcriptional gene silencing	0.0010 (2/1936)	0.0002 (5/31285)	0.0280428	0.973481	2		transcript:ENST00000533164/transcript:ENST00000484566
BP	GO:0046204	nor-spermidine metabolic process	0.0010 (2/1936)	0.0002 (5/31285)	0.0280428	0.973481	2	transcript:ENST00000575826	transcript:ENST00000571074
BP	GO:0045006	DNA deamination	0.0010 (2/1936)	0.0002 (5/31285)	0.0280428	0.973481	2	EXOSC6	transcript:ENST00000465229
CC	GO:0099631	postsynaptic endocytic zone cytoplasmic component	0.0010 (2/1936)	0.0002 (5/31285)	0.0280428	0.973481	2	transcript:ENST00000464497	transcript:ENST00000510734
BP	GO:1902458	positive regulation of stomatal opening	0.0010 (2/1936)	0.0002 (5/31285)	0.0280428	0.973481	2	LRRK1/IRAK3
BP	GO:0032919	spermine acetylation	0.0010 (2/1936)	0.0002 (5/31285)	0.0280428	0.973481	2	transcript:ENST00000575826	transcript:ENST00000571074
BP	GO:0032920	putrescine acetylation	0.0010 (2/1936)	0.0002 (5/31285)	0.0280428	0.973481	2	transcript:ENST00000575826	transcript:ENST00000571074
BP	GO:0051214	RNAi-mediated antiviral immunity against RNA virus	0.0010 (2/1936)	0.0002 (5/31285)	0.0280428	0.973481	2	DHX58/IFIH1
BP	GO:0062173	brexanolone metabolic process	0.0010 (2/1936)	0.0002 (5/31285)	0.0280428	0.973481	2		DHRS9/RDH5
BP	GO:0042267	natural killer cell mediated cytotoxicity	0.0134 (26/1936)	0.0099 (311/31285)	0.0280562	0.973481	26	transcript:ENST00000483665/LILRB2/CEBPD/gene:ENSG00000259529/HLA-F/ULBP1/OSCAR/HLA-C/LILRA6/transcript:ENST00000452281/PTPRO/CLEC12A/transcript:ENST00000325960/STAT1/FCGR1A/WDFY4/LILRB4/LILRA5/transcript:ENST00000581448/SLAMF7/transcript:ENST00000590388	transcript:ENST00000586810/transcript:ENST00000515800/transcript:ENST00000555609/transcript:ENST00000479896/FCGR2A
BP	GO:0035825	homologous recombination	0.0046 (9/1936)	0.0025 (77/31285)	0.0280619	0.973481	9	transcript:ENST00000534320/transcript:ENST00000482936/IFIH1/DHX58	transcript:ENST00000533482/transcript:ENST00000461221/transcript:ENST00000455743/transcript:ENST00000468435/RTEL1
BP	GO:0061644	protein localization to CENP-A containing chromatin	0.0046 (9/1936)	0.0025 (77/31285)	0.0280619	0.973481	9	HIST2H2BF/transcript:ENST00000618193/transcript:ENST00000314088/transcript:ENST00000612061/HIST1H2BG/HIST2H2BE/transcript:ENST00000419525/transcript:ENST00000621520/HIST1H2AG
BP	GO:0016071	mRNA metabolic process	0.0083 (16/1936)	0.0054 (169/31285)	0.0284011	0.982486	16	RBMS3/transcript:ENST00000562583/CEBPD/transcript:ENST00000471308/transcript:ENST00000502762/RBM39/gene:ENSG00000255663/transcript:ENST00000495305/transcript:ENST00000475126/transcript:ENST00000514671	BCL2L2-PABPN1/transcript:ENST00000475997/transcript:ENST00000542140/transcript:ENST00000484566/transcript:ENST00000338163/transcript:ENST00000630114
BP	GO:0071035	nuclear polyadenylation-dependent rRNA catabolic process	0.0031 (6/1936)	0.0013 (42/31285)	0.0286221	0.982486	6	transcript:ENST00000480240/HELZ2/EXOSC6/transcript:ENST00000357464/DDX60	transcript:ENST00000465229
CC	GO:0033620	Mei2 nuclear dot complex	0.0031 (6/1936)	0.0013 (42/31285)	0.0286221	0.982486	6	transcript:ENST00000475126/transcript:ENST00000507302/gene:ENSG00000255663/transcript:ENST00000514929	BCL2L2-PABPN1/transcript:ENST00000552994
BP	GO:0071353	cellular response to interleukin-4	0.0114 (22/1936)	0.0081 (254/31285)	0.0291035	0.982486	22	ADAMTS14/TUBA8/UNC5B/CCL3/transcript:ENST00000547173/IL24/transcript:ENST00000474964/transcript:ENST00000616321/CCL8/ANKRD45/MRC1/ADAMTS5/transcript:ENST00000484496/CCL7/KBTBD12/KLHDC7B/transcript:ENST00000549098/CCL20	transcript:ENST00000532746/transcript:ENST00000547475/KLHL7/CHODL
BP	GO:0045190	isotype switching	0.0052 (10/1936)	0.0029 (90/31285)	0.0291327	0.982486	10	EXOSC6/transcript:ENST00000453186/transcript:ENST00000312087/BATF2/CD86	transcript:ENST00000353275/transcript:ENST00000335760/transcript:ENST00000465229/transcript:ENST00000229866/KIAA1841
BP	GO:0016032	viral process	0.0052 (10/1936)	0.0029 (90/31285)	0.0291327	0.982486	10	transcript:ENST00000536606/NR1I3/VDR/RRM1/CCL8/CCL7/CCL3	transcript:ENST00000484566/transcript:ENST00000533164/transcript:ENST00000544223
BP	GO:0030856	regulation of epithelial cell differentiation	0.0052 (10/1936)	0.0029 (90/31285)	0.0291327	0.982486	10	transcript:ENST00000452281/JUP/ALOX5/ALOXE3/STAT1/IFIH1/INHBA/DHX58	PRLR/gene:ENSG00000258864
BP	GO:0036178	filamentous growth of a population of unicellular organisms in response to neutral pH	0.0052 (10/1936)	0.0029 (90/31285)	0.0291327	0.982486	10	RP11-468E2.1/transcript:ENST00000424354/ENTPD1/RP11-385D13.1/transcript:ENST00000504325/transcript:ENST00000511473/transcript:ENST00000556575	transcript:ENST00000503494/transcript:ENST00000573196/transcript:ENST00000466227
CC	GO:0009534	chloroplast thylakoid	0.0067 (13/1936)	0.0041 (129/31285)	0.0292204	0.982486	13	ALOX5/transcript:ENST00000553837/PSAT1/ALOXE3/transcript:ENST00000557433/RBM39/transcript:ENST00000472580/transcript:ENST00000475126/transcript:ENST00000569820/IL4I1	transcript:ENST00000291892/transcript:ENST00000338163/transcript:ENST00000415933
BP	GO:0007279	pole cell formation	0.0062 (12/1936)	0.0037 (116/31285)	0.0295594	0.982486	12	TDRD6/transcript:ENST00000443963/FMNL3/PSTPIP1/IFIH1/DHX58/DNAH12/transcript:ENST00000585841	ANLN/CSRP3/transcript:ENST00000484566/transcript:ENST00000533164
BP	GO:0032736	positive regulation of interleukin-13 production	0.0103 (20/1936)	0.0072 (226/31285)	0.0297748	0.982486	20	NR1I3/VDR/IRF7/IL1RL1/HLA-F/ULBP1/IRF5/HLA-C/IRF8/IL18R1/NR4A1/TLR4/transcript:ENST00000533182/transcript:ENST00000539881/C8orf44-SGK3/LGALS9/TLR2/IRF9	RP11-47I22.4/transcript:ENST00000571451
BP	GO:0032740	positive regulation of interleukin-17 production	0.0103 (20/1936)	0.0072 (226/31285)	0.0297748	0.982486	20	EBI3/NR1I3/RASGRP3/VDR/IL6/transcript:ENST00000421364/SLC7A5/CCL3/ZIC2/CARD9/SLC7A11/CCL8/transcript:ENST00000507218/CCL7/SLC7A7/transcript:ENST00000539881/SLAMF7/transcript:ENST00000593532	RP11-47I22.4/transcript:ENST00000571451
CC	GO:0005666	RNA polymerase III complex	0.0036 (7/1936)	0.0017 (54/31285)	0.0304271	0.982486	7	transcript:ENST00000508848/transcript:ENST00000215587/transcript:ENST00000432789	transcript:ENST00000564750/transcript:ENST00000503915/transcript:ENST00000431534/transcript:ENST00000589737
MF	GO:0140311	protein sequestering activity	0.0150 (29/1936)	0.0114 (358/31285)	0.0307054	0.982486	29	transcript:ENST00000454552/SESN2/transcript:ENST00000415942/ECM2/CTNND2/SDCBP2/IRF8/transcript:ENST00000426248/FLRT1/PRKRA/PTPRO/transcript:ENST00000522484/transcript:ENST00000421462/EHF/ADGRA2/BOLA2	LRRTM4/ELF5/transcript:ENST00000382214/transcript:ENST00000479896/LRRC4/LRRC17/transcript:ENST00000611848/transcript:ENST00000424699/RP11-762I7.5/transcript:ENST00000573196/transcript:ENST00000466227/LDLRAD4/transcript:ENST00000568004
MF	GO:0001691	pseudophosphatase activity	0.0041 (8/1936)	0.0021 (66/31285)	0.0307548	0.982486	8	DENND2D/SSH3/MTMR1/MTMR10/DUSP1	transcript:ENST00000532881/transcript:ENST00000294737/DENND2A
BP	GO:0031460	glycine betaine transport	0.0041 (8/1936)	0.0021 (66/31285)	0.0307548	0.982486	8	SLC7A11/SLC6A9/SLC7A7/SLC7A5	transcript:ENST00000566598/SLC38A6/transcript:ENST00000549258/SLC38A4
MF	GO:0008157	protein phosphatase 1 binding	0.0119 (23/1936)	0.0086 (270/31285)	0.0308591	0.982486	23	LILRB2/ROS1/LRRC2/PPP1R15A/OSCAR/NCF4/transcript:ENST00000558084/LRRK1/BTK/transcript:ENST00000445387/DLGAP1/LILRA6/PRKRA/SH2D3C/transcript:ENST00000413704/LILRB4/LILRA5/SPTBN5/PPP1R3F	ITK/transcript:ENST00000465045/KMT2C/transcript:ENST00000568004
CC	GO:0035060	brahma complex	0.0067 (13/1936)	0.0042 (130/31285)	0.0308652	0.982486	13	transcript:ENST00000552674/transcript:ENST00000558357/transcript:ENST00000558084/transcript:ENST00000495733/transcript:ENST00000534320/transcript:ENST00000545307/transcript:ENST00000421364/transcript:ENST00000554402/ACTG2	transcript:ENST00000585057/KMT2C/transcript:ENST00000572105/transcript:ENST00000425660
BP	GO:0002729	positive regulation of natural killer cell cytokine production	0.0052 (10/1936)	0.0029 (91/31285)	0.0311475	0.982486	10	LILRA5/LILRB2/LILRA6/GIMAP4/HLA-F/LCP2/ULBP1/HLA-C/LILRB4/OSCAR
CC	GO:0008024	cyclin/CDK positive transcription elongation factor complex	0.0052 (10/1936)	0.0029 (91/31285)	0.0311475	0.982486	10	CDKL3/CCNL1/transcript:ENST00000495733/transcript:ENST00000482914/transcript:ENST00000488340	transcript:ENST00000555408/CDKL5/transcript:ENST00000470121/transcript:ENST00000484049/transcript:ENST00000544041
BP	GO:0000028	ribosomal small subunit assembly	0.0052 (10/1936)	0.0029 (91/31285)	0.0311475	0.982486	10	transcript:ENST00000502762/RBM39/GIMAP4/gene:ENSG00000255663/transcript:ENST00000514671	transcript:ENST00000532746/DDB2/transcript:ENST00000542140/transcript:ENST00000338163/transcript:ENST00000630114
BP	GO:1901741	positive regulation of myoblast fusion	0.0098 (19/1936)	0.0068 (213/31285)	0.031251	0.982486	19	TNF/transcript:ENST00000496808/CXCL3/UNC5B/CCL3/transcript:ENST00000534180/CSF2RB/CCL8/transcript:ENST00000580805/transcript:ENST00000409403/GDF15/CXCL5/CXCL2/CCL7/THSD7A/transcript:ENST00000357048	transcript:ENST00000508798/transcript:ENST00000530726/transcript:ENST00000270361
BP	GO:1904837	beta-catenin-TCF complex assembly	0.0026 (5/1936)	0.0010 (32/31285)	0.0313837	0.982486	5	transcript:ENST00000558084/transcript:ENST00000534320/transcript:ENST00000445387	KMT2C/transcript:ENST00000468435
BP	GO:1904086	regulation of epiboly involved in gastrulation with mouth forming second	0.0026 (5/1936)	0.0010 (32/31285)	0.0313837	0.982486	5	transcript:ENST00000580805/INHBE/GDF15/BMP6/INHBA
BP	GO:0071139	resolution of DNA recombination intermediates	0.0026 (5/1936)	0.0010 (32/31285)	0.0313837	0.982486	5	BIVM-ERCC5/transcript:ENST00000457179	transcript:ENST00000584582/ERCC5/transcript:ENST00000582981
BP	GO:0035864	response to potassium ion	0.0088 (17/1936)	0.0059 (185/31285)	0.0313884	0.982486	17	ADAMTS14/transcript:ENST00000558084/KCNG1/ADAMTS5/transcript:ENST00000413704/transcript:ENST00000445387/UNC5B/DDX60/NGF/KCNJ3	SLC26A7/KCNA7/SLC26A4/transcript:ENST00000465045/SLC9A7/transcript:ENST00000334884/KMT2C
MF	GO:0003690	double-stranded DNA binding	0.0387 (75/1936)	0.0344 (1077/31285)	0.0314754	0.982486	75	IFIT1/NR1I3/VDR/TREX1/FLI1/CEBPD/transcript:ENST00000482936/ESR1/transcript:ENST00000511615/transcript:ENST00000496808/MNDA/HES1/transcript:ENST00000591120/HEY1/DDX60/transcript:ENST00000475126/transcript:ENST00000461311/transcript:ENST00000415942/RBMS3/transcript:ENST00000593946/transcript:ENST00000465003/MSC/transcript:ENST00000574951/transcript:ENST00000462523/BIVM-ERCC5/transcript:ENST0000048…	transcript:ENST00000425046/ERCC5/ELF5/transcript:ENST00000382214/transcript:ENST00000630114/transcript:ENST00000485479/transcript:ENST00000571451/RTEL1/transcript:ENST00000535558/transcript:ENST00000472476/transcript:ENST00000533482/transcript:ENST00000586337/transcript:ENST00000611848/transcript:ENST00000475997/transcript:ENST00000484566/transcript:ENST00000338163/transcript:ENST00000413809/tran…
CC	GO:0098835	presynaptic endocytic zone membrane	0.0031 (6/1936)	0.0014 (43/31285)	0.0317395	0.982486	6	MX2/transcript:ENST00000464497/MX1/FCHO1	transcript:ENST00000617103/transcript:ENST00000510734
BP	GO:0034393	positive regulation of smooth muscle cell apoptotic process	0.0031 (6/1936)	0.0014 (43/31285)	0.0317395	0.982486	6	EBI3/transcript:ENST00000379707/IL12A/transcript:ENST00000576235	transcript:ENST00000588814/TTC12
BP	GO:0014038	regulation of Schwann cell differentiation	0.0031 (6/1936)	0.0014 (43/31285)	0.0317395	0.982486	6	CDKL3/CDK18	transcript:ENST00000555408/CDKL5/transcript:ENST00000566631/CDK15
BP	GO:0033299	secretion of lysosomal enzymes	0.0031 (6/1936)	0.0014 (43/31285)	0.0317395	0.982486	6	RP11-468E2.1/transcript:ENST00000562746/WDFY4/transcript:ENST00000529332	transcript:ENST00000561419/transcript:ENST00000567523
BP	GO:0071404	cellular response to low-density lipoprotein particle stimulus	0.0129 (25/1936)	0.0096 (300/31285)	0.0317991	0.982486	25	FCER1G/transcript:ENST00000538239/VDR/CES3/transcript:ENST00000421674/CES1/MMP9/ABCA10/gene:ENSG00000259753/transcript:ENST00000375290/MRC1/MMP12/CD36/MMP3/transcript:ENST00000424354/transcript:ENST00000357390/ABCA5/transcript:ENST00000593532/EPB41L3	PTCH1/transcript:ENST00000515800/transcript:ENST00000482958/transcript:ENST00000586995/transcript:ENST00000530726/transcript:ENST00000508798
CC	GO:0048476	Holliday junction resolvase complex	0.0021 (4/1936)	0.0007 (22/31285)	0.0320603	0.982486	4	transcript:ENST00000482007/transcript:ENST00000475762/EME2/transcript:ENST00000524647
BP	GO:1903661	positive regulation of complement-dependent cytotoxicity	0.0021 (4/1936)	0.0007 (22/31285)	0.0320603	0.982486	4	CD163/transcript:ENST00000588198/transcript:ENST00000587251	CD6
MF	GO:0120108	DNA-3'-diphospho-5'-guanosine diphosphatase	0.0021 (4/1936)	0.0007 (22/31285)	0.0320603	0.982486	4	transcript:ENST00000465003/transcript:ENST00000593946/transcript:ENST00000483148	transcript:ENST00000485479
BP	GO:1901255	nucleotide-excision repair involved in interstrand cross-link repair	0.0021 (4/1936)	0.0007 (22/31285)	0.0320603	0.982486	4	BIVM-ERCC5/DDX60/transcript:ENST00000462523	ERCC5
BP	GO:1902947	regulation of tau-protein kinase activity	0.0021 (4/1936)	0.0007 (22/31285)	0.0320603	0.982486	4	C5AR1/FPR3/GPR1/CMKLR1
BP	GO:0097294	'de novo' XMP biosynthetic process	0.0021 (4/1936)	0.0007 (22/31285)	0.0320603	0.982486	4	transcript:ENST00000623287/transcript:ENST00000580356/transcript:ENST00000484496	transcript:ENST00000424203
BP	GO:0000732	DNA strand displacement	0.0021 (4/1936)	0.0007 (22/31285)	0.0320603	0.982486	4	transcript:ENST00000482936/DHX58/IFIH1	RTEL1
MF	GO:0033699	DNA 5'-adenosine monophosphate hydrolase activity	0.0021 (4/1936)	0.0007 (22/31285)	0.0320603	0.982486	4	transcript:ENST00000465003/transcript:ENST00000593946/transcript:ENST00000483148	transcript:ENST00000485479
BP	GO:0048589	developmental growth	0.0155 (30/1936)	0.0120 (375/31285)	0.0327433	0.982486	30	HOXD9/transcript:ENST00000534320/transcript:ENST00000401730/ROS1/transcript:ENST00000475126/ZIC2/PNLIPRP3/transcript:ENST00000457179/transcript:ENST00000430644/PCK2/HOXA10/transcript:ENST00000522484/GNAL/transcript:ENST00000600289/gene:ENSG00000255663/transcript:ENST00000550704/MERTK/transcript:ENST00000554402/SRRM5	transcript:ENST00000582981/LSM4/SOX7/transcript:ENST00000415891/transcript:ENST00000566631/transcript:ENST00000542140/BCL2L2-PABPN1/transcript:ENST00000611848/transcript:ENST00000439775/transcript:ENST00000601065/transcript:ENST00000341310
MF	GO:0008237	metallopeptidase activity	0.0129 (25/1936)	0.0096 (301/31285)	0.0329042	0.982486	25	ADAMTS14/ANPEP/TNFAIP6/C1R/UNC5B/MMP9/transcript:ENST00000487078/transcript:ENST00000373963/MRC1/MMP12/transcript:ENST00000483364/ADAMTS5/PAPPA2/transcript:ENST00000443875/transcript:ENST00000529473/MMP3/THSD7A/transcript:ENST00000531329/transcript:ENST00000569820	transcript:ENST00000522800/AGBL5/CSMD3/transcript:ENST00000526491/transcript:ENST00000468065/transcript:ENST00000520626
BP	GO:0070178	D-serine metabolic process	0.0015 (3/1936)	0.0004 (13/31285)	0.0329632	0.982486	3	transcript:ENST00000557433/transcript:ENST00000553837/SDS
MF	GO:0004845	uracil phosphoribosyltransferase activity	0.0015 (3/1936)	0.0004 (13/31285)	0.0329632	0.982486	3	transcript:ENST00000462091/transcript:ENST00000479719	transcript:ENST00000467167
BP	GO:0000101	sulfur amino acid transport	0.0015 (3/1936)	0.0004 (13/31285)	0.0329632	0.982486	3	SLC7A7/SLC7A11/SLC7A5
MF	GO:0000102	L-methionine secondary active transmembrane transporter activity	0.0015 (3/1936)	0.0004 (13/31285)	0.0329632	0.982486	3	SLC7A7/SLC7A11/SLC7A5
MF	GO:0016937	short-chain fatty acyl-CoA dehydrogenase activity	0.0015 (3/1936)	0.0004 (13/31285)	0.0329632	0.982486	3	transcript:ENST00000481262/transcript:ENST00000583858	ACADVL
BP	GO:1904999	positive regulation of leukocyte adhesion to arterial endothelial cell	0.0015 (3/1936)	0.0004 (13/31285)	0.0329632	0.982486	3	TNF/ALOXE3/ALOX5
BP	GO:0006535	cysteine biosynthetic process from serine	0.0015 (3/1936)	0.0004 (13/31285)	0.0329632	0.982486	3	CBSL/CBS/CTH
MF	GO:0061654	NEDD8 conjugating enzyme activity	0.0015 (3/1936)	0.0004 (13/31285)	0.0329632	0.982486	3	transcript:ENST00000441728/transcript:ENST00000455999	transcript:ENST00000417231
BP	GO:1903692	methionine import across plasma membrane	0.0015 (3/1936)	0.0004 (13/31285)	0.0329632	0.982486	3	SLC7A7/SLC7A11/SLC7A5
BP	GO:0070947	neutrophil-mediated killing of fungus	0.0015 (3/1936)	0.0004 (13/31285)	0.0329632	0.982486	3	NCF4/NCF1/PSTPIP1
BP	GO:0051170	import into nucleus	0.0062 (12/1936)	0.0038 (118/31285)	0.0331595	0.982486	12	transcript:ENST00000494339/transcript:ENST00000502762/RBM39/transcript:ENST00000507218/HTATIP2/transcript:ENST00000545236/transcript:ENST00000514671	transcript:ENST00000419510/transcript:ENST00000546531/transcript:ENST00000436958/transcript:ENST00000338163/transcript:ENST00000630114
MF	GO:0030983	mismatched DNA binding	0.0036 (7/1936)	0.0018 (55/31285)	0.0332388	0.982486	7	transcript:ENST00000465003/transcript:ENST00000483148/transcript:ENST00000463144/transcript:ENST00000312087	transcript:ENST00000353275/transcript:ENST00000485479/transcript:ENST00000493662
MF	GO:0015175	neutral L-amino acid transmembrane transporter activity	0.0052 (10/1936)	0.0029 (92/31285)	0.0332585	0.982486	10	SLC7A11/SLC1A4/SLC6A9/SLC7A5/SLC7A7/SLC3A2	transcript:ENST00000566598/SLC38A6/SLC38A4/transcript:ENST00000549258
CC	GO:0070820	tertiary granule	0.0041 (8/1936)	0.0021 (67/31285)	0.0332732	0.982486	8	gene:ENSG00000268400/ADAMTS14/ADAMTS5/transcript:ENST00000311943/transcript:ENST00000529473	transcript:ENST00000468065/transcript:ENST00000530122/transcript:ENST00000526491
BP	GO:0071657	positive regulation of granulocyte colony-stimulating factor production	0.0041 (8/1936)	0.0021 (67/31285)	0.0332732	0.982486	8	LILRA5/LILRB2/LILRB4/transcript:ENST00000435201/LMO1/transcript:ENST00000558656/LILRA6/OSCAR
BP	GO:2000669	negative regulation of dendritic cell apoptotic process	0.0072 (14/1936)	0.0046 (145/31285)	0.0334292	0.982486	14	LILRA5/CCR5/LILRB2/MERTK/LILRA6/LILRB4/CXCR4/CCL3/ROS1/CCL8/CCL7/CCL20/OSCAR	BCL2L2-PABPN1
CC	GO:0044233	mitochondria-associated endoplasmic reticulum membrane contact site	0.0057 (11/1936)	0.0034 (105/31285)	0.0334311	0.982486	11	transcript:ENST00000536606/TMX2/GRAMD1A/transcript:ENST00000528110/transcript:ENST00000299596/MBOAT7/transcript:ENST00000524543	transcript:ENST00000607742/TMEM41B/transcript:ENST00000529403/transcript:ENST00000524972
MF	GO:0046966	nuclear thyroid hormone receptor binding	0.0114 (22/1936)	0.0082 (258/31285)	0.0338056	0.982486	22	NR1I3/VDR/transcript:ENST00000577831/ESR1/transcript:ENST00000421364/transcript:ENST00000580008/transcript:ENST00000495733/transcript:ENST00000445387/transcript:ENST00000538526/NR4A1/OAS3/OAS2/OAS1/DTX4/transcript:ENST00000534269/transcript:ENST00000312087	transcript:ENST00000353275/transcript:ENST00000586337/transcript:ENST00000431180/transcript:ENST00000512140/transcript:ENST00000527613/transcript:ENST00000510866
BP	GO:0002726	positive regulation of T cell cytokine production	0.0067 (13/1936)	0.0042 (132/31285)	0.0343542	0.982486	13	LRRK1/SAMSN1/CCL7/transcript:ENST00000522484/PAPPA2/HLA-F/HLA-C/CCL8/ULBP1/CCL20/CCL3	CSMD3/transcript:ENST00000561139
BP	GO:0006954	inflammatory response	0.1100 (213/1936)	0.1079 (3376/31285)	0.0344581	0.982486	213	FCER1G/ADAMTS14/transcript:ENST00000483665/CARD16/TREX1/transcript:ENST00000534320/DDX3Y/IL1RL1/C1R/CXCL3/UNC5B/transcript:ENST00000591662/SERPINB2/ECM2/LRRK1/BTK/transcript:ENST00000554738/SIGLEC1/CCL8/FPR3/IRF8/IL18R1/IL1RN/CD300C/transcript:ENST00000518360/TLR4/transcript:ENST00000483364/GPR35/GBP5/ATF3/MMP12/HIST1H2BG/transcript:ENST00000539881/LGALS9/IL1A/INHBE/IRF9/MERTK/transcript:ENST0000…	transcript:ENST00000419510/transcript:ENST00000459912/LRRTM4/transcript:ENST00000548938/SMPD1/NOSTRIN/RP11-47I22.4/transcript:ENST00000468435/NDP/transcript:ENST00000526491/C14orf105/transcript:ENST00000611848/transcript:ENST00000522610/transcript:ENST00000530726/JMJD7-PLA2G4B/MAP2K3/transcript:ENST00000422426/TICAM2/CD6/transcript:ENST00000547787/RDH5/CD300LB/CSRP3/transcript:ENST00000472940/ITK…
BP	GO:0035458	cellular response to interferon-beta	0.0150 (29/1936)	0.0116 (362/31285)	0.0347557	0.982486	29	IFIT1/TREX1/IRF7/MNDA/CAMK1D/IFIT3/IRF5/IRF8/IFITM1/ERN1/TREX2/transcript:ENST00000452281/transcript:ENST00000518360/TLR4/GBP5/OAS3/IFITM2/STAT1/transcript:ENST00000533182/OAS2/OAS1/GBP4/IRF9/IFITM3/transcript:ENST00000574633/transcript:ENST00000357048	DCLK1/transcript:ENST00000270361/transcript:ENST00000509576
MF	GO:0140945	histone H3K4 monomethyltransferase activity	0.0046 (9/1936)	0.0026 (80/31285)	0.0348207	0.982486	9	transcript:ENST00000558084/transcript:ENST00000534320/transcript:ENST00000413704/transcript:ENST00000445387	transcript:ENST00000465045/transcript:ENST00000334884/KMT2C/transcript:ENST00000441123/transcript:ENST00000468435
MF	GO:0043125	ErbB-3 class receptor binding	0.0046 (9/1936)	0.0026 (80/31285)	0.0348207	0.982486	9	transcript:ENST00000460679/CDKL3/CDK18	transcript:ENST00000555408/CDKL5/transcript:ENST00000510106/transcript:ENST00000566631/transcript:ENST00000426902/CDK15
BP	GO:0001812	positive regulation of type I hypersensitivity	0.0046 (9/1936)	0.0026 (80/31285)	0.0348207	0.982486	9	FCER1G/SLA/transcript:ENST00000483665/LILRB2/BTK/HCK/FCGR1A	FCGR2A/ITK
BP	GO:0072133	metanephric mesenchyme morphogenesis	0.0031 (6/1936)	0.0014 (44/31285)	0.0350698	0.982486	6	INHBE/GDF15/OSR2/BMP6/INHBA	transcript:ENST00000611848
BP	GO:0044830	modulation by host of viral RNA genome replication	0.0031 (6/1936)	0.0014 (44/31285)	0.0350698	0.982486	6	transcript:ENST00000422741/transcript:ENST00000299596/transcript:ENST00000524543	FBXL2/transcript:ENST00000448002/TMEM41B
BP	GO:0022607	cellular component assembly	0.0062 (12/1936)	0.0038 (119/31285)	0.0350723	0.982486	12	ARHGAP30/MYO15B/NCF1/PSTPIP1/MYO1G/transcript:ENST00000495242/ARHGAP9/ARHGAP40/transcript:ENST00000495564/MYO1F	LDB2/NOSTRIN
CC	GO:0035580	specific granule lumen	0.0222 (43/1936)	0.0184 (576/31285)	0.0351271	0.982486	43	CTSZ/PTX3/LILRB2/C1R/CXCL3/LRRC2/UNC5B/RP11-295K3.1/OSCAR/MMP9/LRRK1/C1S/BTK/PI3/transcript:ENST00000491768/PTGDS/LILRA6/JUP/PTPRO/MMP12/CXCL5/NEU4/HCK/CXCL2/transcript:ENST00000480073/transcript:ENST00000495564/LILRB4/MMP3/SLA/LILRA5/SPTBN5/PSTPIP1/transcript:ENST00000512070/CXCL8	LRRTM4/transcript:ENST00000515800/ITK/transcript:ENST00000561139/transcript:ENST00000479896/transcript:ENST00000478631/LRRC17/FOLR3/transcript:ENST00000568004
BP	GO:0039529	RIG-I signaling pathway	0.0026 (5/1936)	0.0011 (33/31285)	0.0353369	0.982486	5	OAS2/OAS1/OAS3/IFIH1/DHX58
BP	GO:0106035	protein maturation by [4Fe-4S] cluster transfer	0.0026 (5/1936)	0.0011 (33/31285)	0.0353369	0.982486	5	transcript:ENST00000374611/transcript:ENST00000559705/transcript:ENST00000581795/transcript:ENST00000565425	transcript:ENST00000582907
BP	GO:0015825	L-serine transport	0.0026 (5/1936)	0.0011 (33/31285)	0.0353369	0.982486	5	SLC1A4	transcript:ENST00000566598/SLC38A6/transcript:ENST00000549258/SLC38A4
BP	GO:0006266	DNA ligation	0.0026 (5/1936)	0.0011 (33/31285)	0.0353369	0.982486	5	transcript:ENST00000465003/transcript:ENST00000601091/transcript:ENST00000483148/transcript:ENST00000594759	transcript:ENST00000485479
BP	GO:2000351	regulation of endothelial cell apoptotic process	0.0026 (5/1936)	0.0011 (33/31285)	0.0353369	0.982486	5	FLT1/SCARF1/TNF/MERTK	transcript:ENST00000504875
BP	GO:0070129	regulation of mitochondrial translation	0.0026 (5/1936)	0.0011 (33/31285)	0.0353369	0.982486	5	transcript:ENST00000557348/transcript:ENST00000553837/transcript:ENST00000557433/transcript:ENST00000555563	transcript:ENST00000556825
BP	GO:0090191	negative regulation of branching involved in ureteric bud morphogenesis	0.0026 (5/1936)	0.0011 (33/31285)	0.0353369	0.982486	5	INHBE/GDF15/BMP6/INHBA/TACSTD2
BP	GO:0044774	mitotic DNA integrity checkpoint signaling	0.0026 (5/1936)	0.0011 (33/31285)	0.0353369	0.982486	5	transcript:ENST00000445387/AURKC	transcript:ENST00000425046/transcript:ENST00000333047/transcript:ENST00000413809
BP	GO:0003290	atrial septum secundum morphogenesis	0.0026 (5/1936)	0.0011 (33/31285)	0.0353369	0.982486	5	transcript:ENST00000445387/transcript:ENST00000312087	transcript:ENST00000353275/transcript:ENST00000431180/KMT2C
CC	GO:0002945	cyclin K-CDK13 complex	0.0026 (5/1936)	0.0011 (33/31285)	0.0353369	0.982486	5	CCNL1/transcript:ENST00000488340	transcript:ENST00000555408/CDKL5/transcript:ENST00000470121
BP	GO:0033552	response to vitamin B3	0.0052 (10/1936)	0.0030 (93/31285)	0.0354676	0.982486	10	transcript:ENST00000345114/ABCA5/ABCA10/CD36/transcript:ENST00000441517/CCL8/CCL7/CCL3	transcript:ENST00000586995/PTCH1
BP	GO:0015804	neutral amino acid transport	0.0052 (10/1936)	0.0030 (93/31285)	0.0354676	0.982486	10	SLC7A11/SLC1A4/SLC6A9/SLC7A5/SLC7A7/SLC3A2	transcript:ENST00000566598/SLC38A6/SLC38A4/transcript:ENST00000549258
BP	GO:0031297	replication fork processing	0.0108 (21/1936)	0.0078 (245/31285)	0.0356986	0.982486	21	CDKL3/transcript:ENST00000482936/DDX60/transcript:ENST00000478046/BIVM-ERCC5/transcript:ENST00000445387/IFIH1/EME2/transcript:ENST00000580038/DHX58/HELZ2/AP000304.12/transcript:ENST00000524647	transcript:ENST00000425046/ERCC5/RTEL1/transcript:ENST00000590193/transcript:ENST00000533482/transcript:ENST00000442660/transcript:ENST00000566524/transcript:ENST00000413809
CC	GO:0097134	cyclin E1-CDK2 complex	0.0041 (8/1936)	0.0022 (68/31285)	0.0359282	0.982486	8	CDKL3/CDK18/ERN1	transcript:ENST00000453535/transcript:ENST00000555408/CDKL5/transcript:ENST00000566631/CDK15
MF	GO:0044547	DNA topoisomerase binding	0.0041 (8/1936)	0.0022 (68/31285)	0.0359282	0.982486	8	transcript:ENST00000445387/gene:ENSG00000255663/transcript:ENST00000583741	transcript:ENST00000425046/transcript:ENST00000584668/transcript:ENST00000367667/transcript:ENST00000413809/transcript:ENST00000542140
BP	GO:0045089	positive regulation of innate immune response	0.0222 (43/1936)	0.0184 (577/31285)	0.0359736	0.982486	43	ADAMTS14/SCARF1/FLT1/IFI35/CCL3/ECM2/CARD9/transcript:ENST00000489775/transcript:ENST00000554738/IFIH1/CCL8/FPR3/DHX58/DENND2D/TLR4/ADAMTS5/GBP5/CCL7/transcript:ENST00000541505/transcript:ENST00000529473/transcript:ENST00000539881/NTNG2/CMKLR1/LGALS9/transcript:ENST00000424354/TLR2/GBP4/transcript:ENST00000593532/BTC/GPR1/PLSCR1/C5AR1/SLC15A3	CDHR3/transcript:ENST00000294737/transcript:ENST00000367667/transcript:ENST00000571451/transcript:ENST00000526491/NRXN3/transcript:ENST00000468065/DENND2A/transcript:ENST00000578469/transcript:ENST00000504875
BP	GO:0002667	regulation of T cell anergy	0.0036 (7/1936)	0.0018 (56/31285)	0.0362182	0.982486	7	LGALS9/RUNX3/HLA-F/LRRC2/ULBP1/HLA-C	transcript:ENST00000568004
BP	GO:1990927	calcium ion regulated lysosome exocytosis	0.0036 (7/1936)	0.0018 (56/31285)	0.0362182	0.982486	7	SYTL1/SYT7/PLA2G4B/UNC13D	JMJD7-PLA2G4B/SYTL2/SYTL5
MF	GO:0004720	protein-lysine 6-oxidase activity	0.0021 (4/1936)	0.0007 (23/31285)	0.0371385	0.982486	4	CD163/transcript:ENST00000588198/transcript:ENST00000587251	CD6
BP	GO:0032642	regulation of chemokine production	0.0021 (4/1936)	0.0007 (23/31285)	0.0371385	0.982486	4	CXCL8/CXCL5/CXCL3/CXCL2
CC	GO:0097539	ciliary transition fiber	0.0021 (4/1936)	0.0007 (23/31285)	0.0371385	0.982486	4	transcript:ENST00000591698	transcript:ENST00000586984/transcript:ENST00000547232/transcript:ENST00000544838
BP	GO:0034475	U4 snRNA 3'-end processing	0.0021 (4/1936)	0.0007 (23/31285)	0.0371385	0.982486	4	DDX60/EXOSC6/transcript:ENST00000357464	transcript:ENST00000465229
BP	GO:2000535	regulation of entry of bacterium into host cell	0.0021 (4/1936)	0.0007 (23/31285)	0.0371385	0.982486	4	CXCL8/CXCL5/CXCL3/CXCL2
BP	GO:0061789	dense core granule priming	0.0021 (4/1936)	0.0007 (23/31285)	0.0371385	0.982486	4	PLA2G4B/RASGRP3/UNC13D	JMJD7-PLA2G4B
BP	GO:0019085	early viral transcription	0.0021 (4/1936)	0.0007 (23/31285)	0.0371385	0.982486	4	CCNL1/transcript:ENST00000488340	transcript:ENST00000470121/transcript:ENST00000484049
MF	GO:0046403	polynucleotide 3'-phosphatase activity	0.0021 (4/1936)	0.0007 (23/31285)	0.0371385	0.982486	4	transcript:ENST00000465003/transcript:ENST00000593946/transcript:ENST00000483148	transcript:ENST00000485479
BP	GO:0018057	peptidyl-lysine oxidation	0.0021 (4/1936)	0.0007 (23/31285)	0.0371385	0.982486	4	CD163/transcript:ENST00000588198/transcript:ENST00000587251	CD6
BP	GO:0001100	negative regulation of exit from mitosis	0.0046 (9/1936)	0.0026 (81/31285)	0.0373024	0.982486	9	transcript:ENST00000409403/CDK18/transcript:ENST00000496808/transcript:ENST00000616467	FBXL2/transcript:ENST00000482010/transcript:ENST00000555408/CDK15/transcript:ENST00000544223
CC	GO:0043505	CENP-A containing nucleosome	0.0046 (9/1936)	0.0026 (81/31285)	0.0373024	0.982486	9	HIST2H2BF/transcript:ENST00000618193/transcript:ENST00000314088/transcript:ENST00000612061/HIST1H2BG/HIST2H2BE/transcript:ENST00000419525/transcript:ENST00000621520/HIST1H2AG
MF	GO:0016829	lyase activity	0.0088 (17/1936)	0.0060 (189/31285)	0.0373701	0.982486	17	CBS/ALOX5/SDS/ALOXE3/PARP9/CBSL/ABHD14A-ACY1/transcript:ENST00000517306/RSAD2/MOCOS	transcript:ENST00000422591/transcript:ENST00000478631/transcript:ENST00000522610/transcript:ENST00000513998/ECI2/FAHD2B/transcript:ENST00000544223
BP	GO:0001553	luteinization	0.0083 (16/1936)	0.0056 (175/31285)	0.0374466	0.982486	16	transcript:ENST00000452281/MMP9/FLT1/MMP12/transcript:ENST00000520579/transcript:ENST00000522484/ESR1/MMP3/STAT1/SCHIP1/MRC1/transcript:ENST00000357048	transcript:ENST00000479896/transcript:ENST00000504875/IQCJ-SCHIP1/transcript:ENST00000270361
BP	GO:0006695	cholesterol biosynthetic process	0.0083 (16/1936)	0.0056 (175/31285)	0.0374466	0.982486	16	CES1/transcript:ENST00000424354/BRSK2/CH25H/transcript:ENST00000525283/CES3/transcript:ENST00000447878/transcript:ENST00000626154/TM7SF2/transcript:ENST00000375290	transcript:ENST00000529601/transcript:ENST00000482958/transcript:ENST00000478631/PTCH1/transcript:ENST00000525607/transcript:ENST00000578469
MF	GO:0019770	IgG receptor activity	0.0031 (6/1936)	0.0014 (45/31285)	0.0386168	0.982486	6	transcript:ENST00000483665/LILRB2/HLA-F/FCGR1A/HLA-C	FCGR2A
BP	GO:0050864	regulation of B cell activation	0.0031 (6/1936)	0.0014 (45/31285)	0.0386168	0.982486	6	TLR2/TLR4/transcript:ENST00000555630/FCGR1A	PPP2R3C/FCGR2A
BP	GO:0036152	phosphatidylethanolamine acyl-chain remodeling	0.0031 (6/1936)	0.0014 (45/31285)	0.0386168	0.982486	6	FAM84B/RARRES3/HRASLS/PLA2G4B/MBOAT7	JMJD7-PLA2G4B
MF	GO:0098505	G-rich strand telomeric DNA binding	0.0041 (8/1936)	0.0022 (69/31285)	0.0387224	0.982486	8	transcript:ENST00000609106/transcript:ENST00000607932/RBM39/transcript:ENST00000502762/transcript:ENST00000514671	transcript:ENST00000338163/transcript:ENST00000307849/transcript:ENST00000630114
BP	GO:0036151	phosphatidylcholine acyl-chain remodeling	0.0041 (8/1936)	0.0022 (69/31285)	0.0387224	0.982486	8	transcript:ENST00000496241/NR1I3/VDR/PLA2G4B/transcript:ENST00000593532/MBOAT7	JMJD7-PLA2G4B/ECI2
MF	GO:0050693	LBD domain binding	0.0041 (8/1936)	0.0022 (69/31285)	0.0387224	0.982486	8	NR4A1/VDR/transcript:ENST00000593532/transcript:ENST00000577831/ESR1/THSD7A/UNC5B	SBSPON
BP	GO:0032733	positive regulation of interleukin-10 production	0.0186 (36/1936)	0.0151 (472/31285)	0.038777	0.982486	36	EBI3/FCER1G/IL6/LILRB2/IRF7/CCL3/OSCAR/IRF5/CCL8/IRF8/LILRA6/transcript:ENST00000452281/CD300C/TLR4/ISG15/CLEC12A/transcript:ENST00000475972/STAT1/transcript:ENST00000533182/CCL7/transcript:ENST00000539881/LILRB4/C8orf44-SGK3/LGALS9/LILRA5/TLR2/IRF9/SAMSN1/IL20RB/transcript:ENST00000469964/CCL20	LRRTM4/transcript:ENST00000515800/CSMD3/RP11-47I22.4/transcript:ENST00000571451
BP	GO:0010225	response to UV-C	0.0088 (17/1936)	0.0061 (190/31285)	0.0389869	0.982486	17	SSH3/BIVM-ERCC5/transcript:ENST00000601091/transcript:ENST00000479719/transcript:ENST00000409403/transcript:ENST00000594759/DUSP1	transcript:ENST00000382240/transcript:ENST00000448002/transcript:ENST00000431390/transcript:ENST00000490904/transcript:ENST00000532881/ERCC5/FBXL2/PDE3A/PDE11A/transcript:ENST00000544041
BP	GO:0061462	protein localization to lysosome	0.0062 (12/1936)	0.0039 (121/31285)	0.0391302	0.982486	12	RP11-468E2.1/transcript:ENST00000480292/ATP11A/KIAA1033/transcript:ENST00000529332	transcript:ENST00000621217/transcript:ENST00000561419/transcript:ENST00000550053/transcript:ENST00000472827/RNF43/transcript:ENST00000508798/transcript:ENST00000530726
MF	GO:0034185	apolipoprotein binding	0.0103 (20/1936)	0.0074 (233/31285)	0.0391354	0.982486	20	transcript:ENST00000538239/DGCR2/LILRB2/transcript:ENST00000591662/OSCAR/PNLIPRP3/ABCA10/C1S/transcript:ENST00000554738/LILRA6/CD300C/CD36/CTRL/LILRB4/LILRA5/ABCA5/PRSS53/MTTP	transcript:ENST00000586995/NRXN3
MF	GO:0032810	sterol response element binding	0.0036 (7/1936)	0.0018 (57/31285)	0.0393685	0.982486	7	transcript:ENST00000424354/NR1I3/VDR/transcript:ENST00000593532/transcript:ENST00000538526	transcript:ENST00000611848/transcript:ENST00000578469
BP	GO:0040032	post-embryonic body morphogenesis	0.0036 (7/1936)	0.0018 (57/31285)	0.0393685	0.982486	7	SCARF1/CTSZ/gene:ENSG00000259753/PTGS2/transcript:ENST00000550010/GNAL	CCT2
MF	GO:0033265	choline binding	0.0036 (7/1936)	0.0018 (57/31285)	0.0393685	0.982486	7	CES1/PTX3/CES3/SLC5A10	transcript:ENST00000531547/transcript:ENST00000482958/ACPP
CC	GO:0097125	cyclin B1-CDK1 complex	0.0036 (7/1936)	0.0018 (57/31285)	0.0393685	0.982486	7	CDKL3/CCNO/CDK18	transcript:ENST00000555408/CDKL5/transcript:ENST00000566631/CDK15
CC	GO:0000109	nucleotide-excision repair complex	0.0026 (5/1936)	0.0011 (34/31285)	0.0395837	0.982486	5	BIVM-ERCC5/transcript:ENST00000616321	ERCC5/DDB2/transcript:ENST00000476581
MF	GO:0031737	CX3C chemokine receptor binding	0.0026 (5/1936)	0.0011 (34/31285)	0.0395837	0.982486	5	CCR5/CCL8/CCL7/CCL20/CCL3
BP	GO:0019530	taurine metabolic process	0.0026 (5/1936)	0.0011 (34/31285)	0.0395837	0.982486	5	GAD1/transcript:ENST00000452281/STAT1	PRLR/transcript:ENST00000493875
BP	GO:0050667	homocysteine metabolic process	0.0026 (5/1936)	0.0011 (34/31285)	0.0395837	0.982486	5	transcript:ENST00000511461/CBS/CTH/CBSL/transcript:ENST00000513439
CC	GO:0070691	P-TEFb complex	0.0026 (5/1936)	0.0011 (34/31285)	0.0395837	0.982486	5	CDKL3/CCNL1/transcript:ENST00000488340	transcript:ENST00000470121/transcript:ENST00000484049
BP	GO:1904666	regulation of ubiquitin protein ligase activity	0.0026 (5/1936)	0.0011 (34/31285)	0.0395837	0.982486	5	SYTL1/SYT7/DYSF	SYTL2/SYTL5
BP	GO:0015811	L-cystine transport	0.0026 (5/1936)	0.0011 (34/31285)	0.0395837	0.982486	5	SLC7A11/SLC1A4/SLC7A5/SLC7A7/SLC3A2
BP	GO:0071765	nuclear inner membrane organization	0.0026 (5/1936)	0.0011 (34/31285)	0.0395837	0.982486	5	transcript:ENST00000502762/transcript:ENST00000514671	transcript:ENST00000439080/transcript:ENST00000472476/transcript:ENST00000630114
CC	GO:0033110	Cvt vesicle membrane	0.0015 (3/1936)	0.0004 (14/31285)	0.0402452	0.982486	3	transcript:ENST00000541960/transcript:ENST00000570856/transcript:ENST00000540424
MF	GO:0016248	channel inhibitor activity	0.0015 (3/1936)	0.0004 (14/31285)	0.0402452	0.982486	3	transcript:ENST00000541505/SLC15A3	BCL2L2-PABPN1
MF	GO:0003853	short-chain 2-methyl fatty acyl-CoA dehydrogenase activity	0.0015 (3/1936)	0.0004 (14/31285)	0.0402452	0.982486	3	transcript:ENST00000481262/transcript:ENST00000583858	ACADVL
MF	GO:0102035	obsolete 2-methylpropanoyl-CoA dehydrogenase activity	0.0015 (3/1936)	0.0004 (14/31285)	0.0402452	0.982486	3	transcript:ENST00000481262/transcript:ENST00000583858	ACADVL
MF	GO:0008470	3-methylbutanoyl-CoA dehydrogenase activity	0.0015 (3/1936)	0.0004 (14/31285)	0.0402452	0.982486	3	transcript:ENST00000481262/transcript:ENST00000583858	ACADVL
BP	GO:0031632	positive regulation of synaptic vesicle fusion to presynaptic active zone membrane	0.0015 (3/1936)	0.0004 (14/31285)	0.0402452	0.982486	3	SYTL1	SYTL2/SYTL5
BP	GO:0015802	basic amino acid transport	0.0015 (3/1936)	0.0004 (14/31285)	0.0402452	0.982486	3	SLC3A2/SLC7A7/SLC7A11
BP	GO:0042424	catecholamine catabolic process	0.0015 (3/1936)	0.0004 (14/31285)	0.0402452	0.982486	3	GAD1/IL4I1	transcript:ENST00000493875
CC	GO:1903754	cortical microtubule plus-end	0.0015 (3/1936)	0.0004 (14/31285)	0.0402452	0.982486	3	transcript:ENST00000434055	DCTN1/transcript:ENST00000415891
BP	GO:0042537	benzene-containing compound metabolic process	0.0015 (3/1936)	0.0004 (14/31285)	0.0402452	0.982486	3	CYP1A1/transcript:ENST00000474308	transcript:ENST00000527688
BP	GO:0042742	defense response to bacterium	0.0759 (147/1936)	0.0728 (2279/31285)	0.0402938	0.982486	147	FCER1G/ADAMTS14/transcript:ENST00000483665/CTSZ/CARD16/transcript:ENST00000496808/C1R/CXCL3/UNC5B/MYO1F/transcript:ENST00000522644/LRRK1/transcript:ENST00000574951/BTK/transcript:ENST00000616321/CCL8/FPR3/IRF8/ERN1/IL1RN/transcript:ENST00000612061/CD300C/TLR4/MMP12/HIST1H2BG/GBP5/transcript:ENST00000541505/transcript:ENST00000539881/LGALS9/ATP8B3/IRF9/MYO15B/transcript:ENST00000593532/transcript:…	transcript:ENST00000459912/transcript:ENST00000382214/transcript:ENST00000447802/RP11-47I22.4/transcript:ENST00000526491/CHODL/MAP2K3/transcript:ENST00000565875/transcript:ENST00000335760/transcript:ENST00000515800/ITK/SLC9A7/transcript:ENST00000560014/ECI2/transcript:ENST00000524039/RNF43/FBXL2/transcript:ENST00000485036/transcript:ENST00000568004/transcript:ENST00000392995/ELF5/transcript:ENST0…
BP	GO:0060383	positive regulation of DNA strand elongation	0.0010 (2/1936)	0.0002 (6/31285)	0.0405165	0.982486	2	transcript:ENST00000609106/transcript:ENST00000607932
MF	GO:0016997	alpha-sialidase activity	0.0010 (2/1936)	0.0002 (6/31285)	0.0405165	0.982486	2	transcript:ENST00000491768/NEU4
BP	GO:1903457	lactate catabolic process	0.0010 (2/1936)	0.0002 (6/31285)	0.0405165	0.982486	2	transcript:ENST00000400769/transcript:ENST00000436747
BP	GO:2001303	lipoxin A4 biosynthetic process	0.0010 (2/1936)	0.0002 (6/31285)	0.0405165	0.982486	2	ALOXE3/ALOX5
CC	GO:0009276	Gram-negative-bacterium-type cell wall	0.0010 (2/1936)	0.0002 (6/31285)	0.0405165	0.982486	2	ABCA5	transcript:ENST00000586995
MF	GO:0033797	selenate reductase activity	0.0010 (2/1936)	0.0002 (6/31285)	0.0405165	0.982486	2	transcript:ENST00000474308	transcript:ENST00000527688
MF	GO:0031071	cysteine desulfurase activity	0.0010 (2/1936)	0.0002 (6/31285)	0.0405165	0.982486	2	gene:ENSG00000272897/MOCOS
MF	GO:0047015	3-hydroxy-2-methylbutyryl-CoA dehydrogenase activity	0.0010 (2/1936)	0.0002 (6/31285)	0.0405165	0.982486	2		DHRS9/RDH5
BP	GO:0010823	obsolete negative regulation of mitochondrion organization	0.0010 (2/1936)	0.0002 (6/31285)	0.0405165	0.982486	2	IAPP/CALCB
MF	GO:0050473	arachidonate 15-lipoxygenase activity	0.0010 (2/1936)	0.0002 (6/31285)	0.0405165	0.982486	2	ALOXE3/ALOX5
BP	GO:0033559	unsaturated fatty acid metabolic process	0.0010 (2/1936)	0.0002 (6/31285)	0.0405165	0.982486	2	ALOXE3/ALOX5
BP	GO:0009643	photosynthetic acclimation	0.0010 (2/1936)	0.0002 (6/31285)	0.0405165	0.982486	2	CBSL/CBS
MF	GO:1990136	linoleate 9S-lipoxygenase activity	0.0010 (2/1936)	0.0002 (6/31285)	0.0405165	0.982486	2	ALOXE3/ALOX5
BP	GO:1905774	regulation of DNA helicase activity	0.0010 (2/1936)	0.0002 (6/31285)	0.0405165	0.982486	2	transcript:ENST00000609106/transcript:ENST00000607932
MF	GO:0047977	hepoxilin-epoxide hydrolase activity	0.0010 (2/1936)	0.0002 (6/31285)	0.0405165	0.982486	2	ALOXE3/ALOX5
MF	GO:0102299	linolenate 9R-lipoxygenase activity	0.0010 (2/1936)	0.0002 (6/31285)	0.0405165	0.982486	2	ALOXE3/ALOX5
MF	GO:0051120	hepoxilin A3 synthase activity	0.0010 (2/1936)	0.0002 (6/31285)	0.0405165	0.982486	2	ALOXE3/ALOX5
BP	GO:1903716	guanine transmembrane transport	0.0010 (2/1936)	0.0002 (6/31285)	0.0405165	0.982486	2	transcript:ENST00000540386	SLC29A2
MF	GO:0038021	leptin receptor activity	0.0010 (2/1936)	0.0002 (6/31285)	0.0405165	0.982486	2	EBI3	LEPR
BP	GO:1903791	uracil transmembrane transport	0.0010 (2/1936)	0.0002 (6/31285)	0.0405165	0.982486	2	transcript:ENST00000540386	SLC29A2
BP	GO:0055063	sulfate ion homeostasis	0.0010 (2/1936)	0.0002 (6/31285)	0.0405165	0.982486	2	transcript:ENST00000557433/transcript:ENST00000553837
BP	GO:0015858	nucleoside transport	0.0010 (2/1936)	0.0002 (6/31285)	0.0405165	0.982486	2	transcript:ENST00000540386	SLC29A2
BP	GO:0035364	thymine transport	0.0010 (2/1936)	0.0002 (6/31285)	0.0405165	0.982486	2	transcript:ENST00000540386	SLC29A2
BP	GO:0009087	methionine catabolic process	0.0010 (2/1936)	0.0002 (6/31285)	0.0405165	0.982486	2	CBSL/CBS
MF	GO:0061708	tRNA-5-taurinomethyluridine 2-sulfurtransferase	0.0010 (2/1936)	0.0002 (6/31285)	0.0405165	0.982486	2	transcript:ENST00000457572	transcript:ENST00000441818
MF	GO:0050584	linoleate 11-lipoxygenase activity	0.0010 (2/1936)	0.0002 (6/31285)	0.0405165	0.982486	2	ALOXE3/ALOX5
MF	GO:0050613	delta14-sterol reductase activity	0.0010 (2/1936)	0.0002 (6/31285)	0.0405165	0.982486	2	TM7SF2	transcript:ENST00000529601
MF	GO:0051267	CP2 mannose-ethanolamine phosphotransferase activity	0.0010 (2/1936)	0.0002 (6/31285)	0.0405165	0.982486	2	transcript:ENST00000506402	transcript:ENST00000504187
CC	GO:0043514	interleukin-12 complex	0.0010 (2/1936)	0.0002 (6/31285)	0.0405165	0.982486	2	EBI3/IL12A
MF	GO:0106282	isoursodeoxycholate 7-beta-dehydrogenase (NAD+) activity	0.0010 (2/1936)	0.0002 (6/31285)	0.0405165	0.982486	2		DHRS9/RDH5
BP	GO:0050902	leukocyte adhesive activation	0.0010 (2/1936)	0.0002 (6/31285)	0.0405165	0.982486	2	CCL8/CCL7
MF	GO:0106283	ursodeoxycholate 7-beta-dehydrogenase (NAD+) activity	0.0010 (2/1936)	0.0002 (6/31285)	0.0405165	0.982486	2		DHRS9/RDH5
BP	GO:1903371	regulation of endoplasmic reticulum tubular network organization	0.0010 (2/1936)	0.0002 (6/31285)	0.0405165	0.982486	2	RP11-1035H13.3	transcript:ENST00000563861
MF	GO:0050486	intramolecular hydroxytransferase activity	0.0010 (2/1936)	0.0002 (6/31285)	0.0405165	0.982486	2	ALOXE3/ALOX5
BP	GO:0010304	PSII associated light-harvesting complex II catabolic process	0.0010 (2/1936)	0.0002 (6/31285)	0.0405165	0.982486	2	transcript:ENST00000442122/transcript:ENST00000569820
BP	GO:0000967	rRNA 5'-end processing	0.0010 (2/1936)	0.0002 (6/31285)	0.0405165	0.982486	2		transcript:ENST00000438329/gene:ENSG00000100101
MF	GO:0045523	interleukin-27 receptor binding	0.0010 (2/1936)	0.0002 (6/31285)	0.0405165	0.982486	2	EBI3	LEPR
MF	GO:0004309	exopolyphosphatase activity	0.0010 (2/1936)	0.0002 (6/31285)	0.0405165	0.982486	2	SMPDL3B	SMPD1
MF	GO:0004308	exo-alpha-sialidase activity	0.0010 (2/1936)	0.0002 (6/31285)	0.0405165	0.982486	2	transcript:ENST00000491768/NEU4
MF	GO:0106237	arachidonate 12(R)-lipoxygenase activity	0.0010 (2/1936)	0.0002 (6/31285)	0.0405165	0.982486	2	ALOXE3/ALOX5
BP	GO:0070276	halogen metabolic process	0.0010 (2/1936)	0.0002 (6/31285)	0.0405165	0.982486	2	transcript:ENST00000474308	transcript:ENST00000527688
MF	GO:0004458	D-lactate dehydrogenase (cytochrome) activity	0.0010 (2/1936)	0.0002 (6/31285)	0.0405165	0.982486	2	transcript:ENST00000400769/transcript:ENST00000436747
MF	GO:0016165	linoleate 13S-lipoxygenase activity	0.0010 (2/1936)	0.0002 (6/31285)	0.0405165	0.982486	2	ALOXE3/ALOX5
BP	GO:1900366	negative regulation of defense response to insect	0.0010 (2/1936)	0.0002 (6/31285)	0.0405165	0.982486	2	ALOXE3/ALOX5
BP	GO:0032918	spermidine acetylation	0.0010 (2/1936)	0.0002 (6/31285)	0.0405165	0.982486	2	transcript:ENST00000575826	transcript:ENST00000571074
MF	GO:0045353	interleukin-1 type II receptor antagonist activity	0.0010 (2/1936)	0.0002 (6/31285)	0.0405165	0.982486	2	IL1RN/IL1B
MF	GO:0045352	interleukin-1 type I receptor antagonist activity	0.0010 (2/1936)	0.0002 (6/31285)	0.0405165	0.982486	2	IL1RN/IL1B
BP	GO:2000685	positive regulation of cellular response to X-ray	0.0010 (2/1936)	0.0002 (6/31285)	0.0405165	0.982486	2	transcript:ENST00000601091/transcript:ENST00000594759
BP	GO:1901751	leukotriene A4 metabolic process	0.0010 (2/1936)	0.0002 (6/31285)	0.0405165	0.982486	2	ALOXE3/ALOX5
MF	GO:0071890	bicarbonate binding	0.0010 (2/1936)	0.0002 (6/31285)	0.0405165	0.982486	2	ADCY10	ECI2
MF	GO:0140793	histone H2AXY142 phosphatase activity	0.0010 (2/1936)	0.0002 (6/31285)	0.0405165	0.982486	2	transcript:ENST00000465115	EYA1
BP	GO:2001306	lipoxin B4 biosynthetic process	0.0010 (2/1936)	0.0002 (6/31285)	0.0405165	0.982486	2	ALOXE3/ALOX5
CC	GO:0036488	CHOP-C/EBP complex	0.0010 (2/1936)	0.0002 (6/31285)	0.0405165	0.982486	2	DDIT3/CEBPD
BP	GO:0035457	cellular response to interferon-alpha	0.0072 (14/1936)	0.0048 (149/31285)	0.0406661	0.982486	14	IFIT1/LILRA5/OAS2/OAS1/LILRB2/MERTK/LILRA6/OAS3/ENTPD1/IFIT3/MNDA/ROS1/transcript:ENST00000394606/LILRB4
BP	GO:0030316	osteoclast differentiation	0.0243 (47/1936)	0.0206 (645/31285)	0.040828	0.982486	47	FCER1G/TYROBP/SNX10/TFEC/FLT1/LILRB2/TNF/CXCL3/transcript:ENST00000421674/CCL3/OSCAR/IL24/INHBA/CCL8/FPR3/LILRA6/CD300C/JUP/GDF15/GPR35/BMP6/ATF3/transcript:ENST00000522484/CXCL5/transcript:ENST00000425141/CXCL2/CCL7/IAPP/LILRB4/transcript:ENST00000424354/INHBE/LILRA5/EHF/CXCR4/CXCL8/EPB41L3/CALCB	CD300LB/GIPR/ELF5/SLC4A4/SYNGAP1/transcript:ENST00000426902/gene:ENSG00000273167/transcript:ENST00000513998/SLC4A3/transcript:ENST00000504875
CC	GO:0016592	mediator complex	0.0062 (12/1936)	0.0039 (122/31285)	0.0412779	0.982486	12	CCNL1/transcript:ENST00000601612/ISG20/transcript:ENST00000577831/transcript:ENST00000534269/transcript:ENST00000580008/transcript:ENST00000488340	gene:ENSG00000141979/transcript:ENST00000599417/transcript:ENST00000527613/transcript:ENST00000470121/transcript:ENST00000484049
BP	GO:0036119	response to platelet-derived growth factor	0.0041 (8/1936)	0.0022 (70/31285)	0.0416581	0.982486	8	LRRK1/SH2D3C/gene:ENSG00000259753/BTK/DDIT3/ROS1	ITK/transcript:ENST00000513998
CC	GO:0099617	matrix side of mitochondrial inner membrane	0.0041 (8/1936)	0.0022 (70/31285)	0.0416581	0.982486	8	SPTBN5/RP11-73M18.2/transcript:ENST00000521036	transcript:ENST00000420627/DHRS9/transcript:ENST00000489117/transcript:ENST00000378081/RDH5
BP	GO:0019884	antigen processing and presentation of exogenous antigen	0.0041 (8/1936)	0.0022 (70/31285)	0.0416581	0.982486	8	transcript:ENST00000543428/transcript:ENST00000483665/HLA-F/FCGR1A/ULBP1/HLA-C/transcript:ENST00000560370	FCGR2A
BP	GO:2000394	positive regulation of lamellipodium morphogenesis	0.0067 (13/1936)	0.0043 (136/31285)	0.0421636	0.982486	13	SLA/BTK/transcript:ENST00000512070/HCK/FILIP1/transcript:ENST00000616321/ROS1/transcript:ENST00000495564	gene:ENSG00000273167/NOSTRIN/ITK/transcript:ENST00000513998/AL513122.2
BP	GO:0045576	mast cell activation	0.0067 (13/1936)	0.0043 (136/31285)	0.0421636	0.982486	13	FCER1G/LILRA5/TLR2/transcript:ENST00000483665/TLR4/SLAMF7/LILRB2/LILRB4/LCP2/FCGR1A/LILRA6/OSCAR	FCGR2A
CC	GO:0031977	thylakoid lumen	0.0031 (6/1936)	0.0015 (46/31285)	0.0423839	0.982486	6	CBS/CBSL/transcript:ENST00000412494/transcript:ENST00000472580/transcript:ENST00000569820	transcript:ENST00000415933
MF	GO:0061752	telomeric repeat-containing RNA binding	0.0031 (6/1936)	0.0015 (46/31285)	0.0423839	0.982486	6	transcript:ENST00000502762/RBM39/IL4I1/transcript:ENST00000514671	transcript:ENST00000630114/transcript:ENST00000338163
BP	GO:0006109	regulation of carbohydrate metabolic process	0.0031 (6/1936)	0.0015 (46/31285)	0.0423839	0.982486	6	NR1I3/VDR/transcript:ENST00000593532/VIP	transcript:ENST00000573196/transcript:ENST00000466227
MF	GO:0019211	phosphatase activator activity	0.0031 (6/1936)	0.0015 (46/31285)	0.0423839	0.982486	6	INHBE/GDF15/BMP6/transcript:ENST00000570380/INHBA/DOK3
BP	GO:0032526	response to retinoic acid	0.0315 (61/1936)	0.0278 (869/31285)	0.0424724	0.982486	61	FABP4/transcript:ENST00000538239/NR1I3/VDR/CTSZ/SCARF1/HRASLS/FLT1/RP11-385D13.1/LMO1/ESR1/DDX3Y/HLA-F/transcript:ENST00000558656/SSH3/MMP9/RARRES3/transcript:ENST00000527170/RUNX3/INPP5J/IGFBP3/transcript:ENST00000375290/INHBA/MRC1/HLA-C/GJD3/NR4A1/transcript:ENST00000409403/transcript:ENST00000520579/TLR4/MMP12/GDF15/BMP6/IGFBP1/transcript:ENST00000587339/PTGES/CTSH/DUSP1/MMP3/GDAP1L1/transcrip…	MAP7D2/PTCH1/transcript:ENST00000503475/transcript:ENST00000511087/SOX7/transcript:ENST00000532881/MEST/KLF17/transcript:ENST00000455997/RPL36A-HNRNPH2/DHRS9/RDH5/transcript:ENST00000578469/transcript:ENST00000504875
BP	GO:0032727	positive regulation of interferon-alpha production	0.0124 (24/1936)	0.0094 (294/31285)	0.042615	0.982486	24	FLT1/IRF7/DDX3Y/ECM2/MMP9/transcript:ENST00000445387/IFIH1/IRF5/DHX58/IRF8/transcript:ENST00000452281/PTPRO/MMP12/TLR4/STAT1/transcript:ENST00000533182/MMP3/TLR2/IRF9	LRRTM4/transcript:ENST00000431180/transcript:ENST00000334884/KMT2C/transcript:ENST00000504875
BP	GO:0000320	re-entry into mitotic cell cycle	0.0021 (4/1936)	0.0008 (24/31285)	0.0426514	0.982486	4	transcript:ENST00000394606	transcript:ENST00000382240/NDP/transcript:ENST00000453535
MF	GO:0019767	IgE receptor activity	0.0021 (4/1936)	0.0008 (24/31285)	0.0426514	0.982486	4	FCER1G/FCGR1A/transcript:ENST00000483665	FCGR2A
MF	GO:0001856	complement component C5a binding	0.0021 (4/1936)	0.0008 (24/31285)	0.0426514	0.982486	4	C5AR1/FPR3/GPR1/CMKLR1
BP	GO:0006297	nucleotide-excision repair, DNA gap filling	0.0021 (4/1936)	0.0008 (24/31285)	0.0426514	0.982486	4	transcript:ENST00000594759/transcript:ENST00000601091	transcript:ENST00000510815/transcript:ENST00000509126
BP	GO:0019219	regulation of nucleobase-containing compound metabolic process	0.0021 (4/1936)	0.0008 (24/31285)	0.0426514	0.982486	4	CDK18	transcript:ENST00000566631/CDK15/transcript:ENST00000555408
BP	GO:0098713	obsolete leucine import across plasma membrane	0.0021 (4/1936)	0.0008 (24/31285)	0.0426514	0.982486	4	SLC3A2/SLC7A7/SLC7A11/SLC7A5
BP	GO:0015829	valine transport	0.0021 (4/1936)	0.0008 (24/31285)	0.0426514	0.982486	4	SLC3A2/SLC7A7/SLC7A11/SLC7A5
MF	GO:0032038	myosin II heavy chain binding	0.0021 (4/1936)	0.0008 (24/31285)	0.0426514	0.982486	4	IQGAP2	transcript:ENST00000633485/transcript:ENST00000573196/transcript:ENST00000466227
BP	GO:1903801	L-leucine import across plasma membrane	0.0021 (4/1936)	0.0008 (24/31285)	0.0426514	0.982486	4	SLC3A2/SLC7A7/SLC7A11/SLC7A5
MF	GO:0019768	high-affinity IgE receptor activity	0.0021 (4/1936)	0.0008 (24/31285)	0.0426514	0.982486	4	FCGR1A/SIGLEC1/transcript:ENST00000483665	FCGR2A
CC	GO:0033001	Fc-gamma receptor III complex	0.0021 (4/1936)	0.0008 (24/31285)	0.0426514	0.982486	4	FCER1G/FCGR1A/transcript:ENST00000483665	FCGR2A
MF	GO:0015203	polyamine transmembrane transporter activity	0.0021 (4/1936)	0.0008 (24/31285)	0.0426514	0.982486	4	ATP11A/SLC7A7/SLC7A11	ATP8A1
BP	GO:0071051	poly(A)-dependent snoRNA 3'-end processing	0.0021 (4/1936)	0.0008 (24/31285)	0.0426514	0.982486	4	DDX60/EXOSC6/transcript:ENST00000357464	transcript:ENST00000465229
MF	GO:0017099	very-long-chain fatty acyl-CoA dehydrogenase activity	0.0021 (4/1936)	0.0008 (24/31285)	0.0426514	0.982486	4	SRD5A2/transcript:ENST00000481262/transcript:ENST00000583858	ACADVL
BP	GO:0015828	tyrosine transport	0.0021 (4/1936)	0.0008 (24/31285)	0.0426514	0.982486	4	SLC3A2/SLC7A7/SLC7A11/SLC7A5
MF	GO:0004530	deoxyribonuclease I activity	0.0021 (4/1936)	0.0008 (24/31285)	0.0426514	0.982486	4	transcript:ENST00000523214/DHX58/IFIH1	transcript:ENST00000522310
BP	GO:0045635	negative regulation of melanocyte differentiation	0.0021 (4/1936)	0.0008 (24/31285)	0.0426514	0.982486	4	GDF15/INHBE/BMP6/INHBA
BP	GO:0035962	response to interleukin-13	0.0021 (4/1936)	0.0008 (24/31285)	0.0426514	0.982486	4	CCL8/CCL7/ATF3/CCL3
BP	GO:0141005	retrotransposon silencing by heterochromatin formation	0.0036 (7/1936)	0.0019 (58/31285)	0.0426925	0.982486	7	transcript:ENST00000413704/transcript:ENST00000445387/transcript:ENST00000312087	transcript:ENST00000353275/transcript:ENST00000431180/transcript:ENST00000334884/KMT2C
BP	GO:0002767	immune response-inhibiting cell surface receptor signaling pathway	0.0036 (7/1936)	0.0019 (58/31285)	0.0426925	0.982486	7	LILRA5/LILRB2/LILRB4/HLA-F/HLA-C/LILRA6/OSCAR
BP	GO:0031123	RNA 3'-end processing	0.0036 (7/1936)	0.0019 (58/31285)	0.0426925	0.982486	7	transcript:ENST00000357464/transcript:ENST00000401730/gene:ENSG00000255663/transcript:ENST00000475126/transcript:ENST00000496634	transcript:ENST00000601065/transcript:ENST00000542140
BP	GO:0002645	positive regulation of tolerance induction	0.0036 (7/1936)	0.0019 (58/31285)	0.0426925	0.982486	7	LILRA5/LILRB2/LILRB4/HLA-F/HLA-C/LILRA6/OSCAR
CC	GO:0097122	cyclin A2-CDK1 complex	0.0036 (7/1936)	0.0019 (58/31285)	0.0426925	0.982486	7	CDKL3/CCNO/CDK18	transcript:ENST00000555408/CDKL5/transcript:ENST00000566631/CDK15
BP	GO:0070664	negative regulation of leukocyte proliferation	0.0052 (10/1936)	0.0031 (96/31285)	0.0427014	0.982486	10	SLA/CCL7/BTK/HCK/transcript:ENST00000498765/CCL8/CCL3/transcript:ENST00000507218	transcript:ENST00000419510/ITK
BP	GO:2000562	negative regulation of CD4-positive, alpha-beta T cell proliferation	0.0093 (18/1936)	0.0066 (207/31285)	0.0435937	0.982486	18	FCER1G/LGALS9/LILRA5/transcript:ENST00000583147/transcript:ENST00000518360/LILRB2/LILRA6/LILRB4/transcript:ENST00000464497/CCL3/CCL8/CCL7/HERC6/CCL20/OSCAR	C14orf105/transcript:ENST00000485036/SLC38A6
MF	GO:1903135	cupric ion binding	0.0026 (5/1936)	0.0011 (35/31285)	0.0441274	0.982486	5	transcript:ENST00000438133/KCP/ATP11A	transcript:ENST00000447501/transcript:ENST00000448413
MF	GO:0008296	3'-5'-DNA exonuclease activity	0.0026 (5/1936)	0.0011 (35/31285)	0.0441274	0.982486	5	TREX2/TREX1/transcript:ENST00000523214/transcript:ENST00000631044	transcript:ENST00000522310
MF	GO:0031726	CCR1 chemokine receptor binding	0.0026 (5/1936)	0.0011 (35/31285)	0.0441274	0.982486	5	CXCL8/CCL8/CCL7/CCL20/CCL3
BP	GO:0000743	nuclear migration involved in conjugation with cellular fusion	0.0026 (5/1936)	0.0011 (35/31285)	0.0441274	0.982486	5	DNAH12/transcript:ENST00000434055	transcript:ENST00000415891/transcript:ENST00000564136/DCTN1
BP	GO:0003210	cardiac atrium formation	0.0026 (5/1936)	0.0011 (35/31285)	0.0441274	0.982486	5	INHBE/MSC/GDF15/BMP6/INHBA
CC	GO:0002944	cyclin K-CDK12 complex	0.0026 (5/1936)	0.0011 (35/31285)	0.0441274	0.982486	5	CCNL1/transcript:ENST00000488340	transcript:ENST00000555408/CDKL5/transcript:ENST00000470121
BP	GO:0045329	carnitine biosynthetic process	0.0026 (5/1936)	0.0011 (35/31285)	0.0441274	0.982486	5	transcript:ENST00000526129/transcript:ENST00000583858/ALDH1A1/transcript:ENST00000481262	ACADVL
BP	GO:0006298	mismatch repair	0.0098 (19/1936)	0.0071 (222/31285)	0.0445821	0.982486	19	TREX1/transcript:ENST00000594759/transcript:ENST00000601091/BTK/transcript:ENST00000445387/transcript:ENST00000463144/TREX2/HCK/SLA/MERTK/transcript:ENST00000312087	transcript:ENST00000353275/ITK/transcript:ENST00000431180/transcript:ENST00000334884/transcript:ENST00000463194/KMT2C/transcript:ENST00000476581/transcript:ENST00000493662
BP	GO:0002687	positive regulation of leukocyte migration	0.0098 (19/1936)	0.0071 (222/31285)	0.0445821	0.982486	19	CCL3/MMP9/gene:ENSG00000259753/PGF/RP11-407N17.3/CCL8/MRC1/C2/MMP12/TLR4/PAPPA2/CCL7/MMP3/TLR2	CSMD3/ADORA2A/transcript:ENST00000426902/MIA2/ITGA10
MF	GO:0035197	siRNA binding	0.0077 (15/1936)	0.0053 (165/31285)	0.0447292	0.982486	15	PRKRA/ECM2/TLR2/TLR4/transcript:ENST00000502762/RBM39/IFIH1/transcript:ENST00000475126/DHX58/transcript:ENST00000514671	LRRTM4/transcript:ENST00000338163/transcript:ENST00000578272/transcript:ENST00000424699/transcript:ENST00000630114
BP	GO:2000418	positive regulation of eosinophil migration	0.0041 (8/1936)	0.0023 (71/31285)	0.0447375	0.982486	8	ADAMTS14/ADAMTS5/CCL8/CCL7/transcript:ENST00000529473/CCL3	transcript:ENST00000468065/transcript:ENST00000526491
CC	GO:0090404	pollen tube tip	0.0041 (8/1936)	0.0023 (71/31285)	0.0447375	0.982486	8	ATP8B3/RAB33A/gene:ENSG00000268975/ATP11A/transcript:ENST00000369973/IRAK3	transcript:ENST00000455997/ATP8A1
BP	GO:0120162	positive regulation of cold-induced thermogenesis	0.0377 (73/1936)	0.0341 (1066/31285)	0.0453217	0.982486	73	EBI3/GADD45B/transcript:ENST00000442122/FABP4/NR1I3/transcript:ENST00000423048/VDR/CES3/IRF7/C5AR1/CEBPD/ESR1/GADD45A/ROS1/ZIC2/CES1/transcript:ENST00000620154/CCR5/transcript:ENST00000583858/PGF/transcript:ENST00000445387/CSF2RB/IRF5/PTGDS/FPR3/IRF8/GJD3/transcript:ENST00000507218/NR4A1/transcript:ENST00000558357/CD36/GNAL/VIP/STAT1/DNAH12/transcript:ENST00000533182/transcript:ENST00000395594/DI…	ACADVL/GIPR/transcript:ENST00000515800/BBS4/TMTC2/LPIN1/transcript:ENST00000447802/transcript:ENST00000482958/ADORA2A/transcript:ENST00000590193/PRLR/LEPR/SCD/C10orf90/gene:ENSG00000258864/transcript:ENST00000413809/transcript:ENST00000547318/transcript:ENST00000510866/TRPV3
BP	GO:0036244	cellular response to neutral pH	0.0046 (9/1936)	0.0027 (84/31285)	0.045463	0.982486	9	transcript:ENST00000424354/ENTPD1/RP11-385D13.1/transcript:ENST00000504325/transcript:ENST00000511473/transcript:ENST00000556575	transcript:ENST00000503494/transcript:ENST00000573196/transcript:ENST00000466227
BP	GO:0010235	guard mother cell cytokinesis	0.0046 (9/1936)	0.0027 (84/31285)	0.045463	0.982486	9	DENND2D/CDKL3/CDK18	transcript:ENST00000453535/transcript:ENST00000555408/transcript:ENST00000294737/CDKL5/DENND2A/CDK15
BP	GO:0002819	regulation of adaptive immune response	0.0062 (12/1936)	0.0040 (124/31285)	0.0458173	0.982486	12	SSH3/transcript:ENST00000483665/transcript:ENST00000533182/IRF9/IRF7/DUSP1/IRF5/FCGR1A/IRF8/IL4I1	transcript:ENST00000532881/FCGR2A
BP	GO:0042538	hyperosmotic salinity response	0.0062 (12/1936)	0.0040 (124/31285)	0.0458173	0.982486	12	SLC15A3/gene:ENSG00000268975/TRIB3/transcript:ENST00000454046/transcript:ENST00000558161/transcript:ENST00000541505/transcript:ENST00000560451/ASNS	transcript:ENST00000453535/transcript:ENST00000436958/TRPV3/EFCAB1
BP	GO:0010875	positive regulation of cholesterol efflux	0.0108 (21/1936)	0.0081 (252/31285)	0.045975	0.982486	21	NR1I3/transcript:ENST00000538239/VDR/ZDHHC11/CES3/ESR1/CES1/ABCA10/transcript:ENST00000375290/NR4A1/CD300C/ABCA5/transcript:ENST00000593532/C1QA/C1QB/C1QC	transcript:ENST00000483292/PTCH1/transcript:ENST00000478793/transcript:ENST00000482958/transcript:ENST00000586995
BP	GO:0043374	CD8-positive, alpha-beta T cell differentiation	0.0036 (7/1936)	0.0019 (59/31285)	0.0461926	0.982486	7	IRF9/IRF7/TNFSF8/GIMAP4/IRF5/transcript:ENST00000533182/IRF8
BP	GO:1905448	positive regulation of mitochondrial ATP synthesis coupled electron transport	0.0036 (7/1936)	0.0019 (59/31285)	0.0461926	0.982486	7	CDKL3/CCNO/CDK18	transcript:ENST00000555408/CDKL5/transcript:ENST00000566631/CDK15
BP	GO:2000860	positive regulation of aldosterone secretion	0.0036 (7/1936)	0.0019 (59/31285)	0.0461926	0.982486	7	INHBE/GDF15/BMP6/C1QA/C1QC/C1QB/INHBA
BP	GO:0048008	platelet-derived growth factor receptor signaling pathway	0.0207 (40/1936)	0.0173 (541/31285)	0.0462301	0.982486	40	FLT1/MYO1G/TNFAIP6/transcript:ENST00000421364/ROS1/SCHIP1/RASGRF2/MYO1F/ARHGAP4/LRRK1/SYTL1/IQGAP2/gene:ENSG00000259753/BTK/transcript:ENST00000495242/NR4A1/PTPRO/transcript:ENST00000520579/SH2D3C/HCK/SMPD3/transcript:ENST00000443875/PARP9/SLA/ARHGAP30/MYO15B/MERTK/PSTPIP1/ARHGAP9	transcript:ENST00000515800/SYTL5/ITK/transcript:ENST00000479896/NOSTRIN/RGS17/RGS4/transcript:ENST00000633485/SYTL2/IQCJ-SCHIP1/transcript:ENST00000504875
BP	GO:0045663	positive regulation of myoblast differentiation	0.0196 (38/1936)	0.0163 (510/31285)	0.0463491	0.982486	38	TNF/transcript:ENST00000534320/transcript:ENST00000401730/transcript:ENST00000496808/transcript:ENST00000421364/CXCL3/LRRC2/CCL3/transcript:ENST00000558084/transcript:ENST00000495733/transcript:ENST00000534180/transcript:ENST00000491768/IGFBP3/CCL8/transcript:ENST00000409403/transcript:ENST00000552674/transcript:ENST00000558357/CXCL5/NEU4/IGFBP1/CXCL2/CCL7/transcript:ENST00000504476/transcript:EN…	CSRP3/transcript:ENST00000487292/transcript:ENST00000441123/SOX7/transcript:ENST00000526711/transcript:ENST00000426902/transcript:ENST00000572105/BORCS8-MEF2B/KMT2C/NCAM2/RANBP3L/transcript:ENST00000568004/transcript:ENST00000601065/transcript:ENST00000425660
CC	GO:0034719	SMN-Sm protein complex	0.0031 (6/1936)	0.0015 (47/31285)	0.0463739	0.982486	6	transcript:ENST00000412033/transcript:ENST00000600289	transcript:ENST00000439775/transcript:ENST00000533164/transcript:ENST00000506734/LSM4
BP	GO:0120176	positive regulation of torso signaling pathway	0.0031 (6/1936)	0.0015 (47/31285)	0.0463739	0.982486	6	SLA/BTK/HCK	ITK/transcript:ENST00000573196/transcript:ENST00000466227
BP	GO:2001006	regulation of cellulose biosynthetic process	0.0031 (6/1936)	0.0015 (47/31285)	0.0463739	0.982486	6	ZDHHC11/TRPA1/transcript:ENST00000443120	transcript:ENST00000478793/ANKRD23/transcript:ENST00000560014
BP	GO:0072136	metanephric mesenchymal cell proliferation involved in metanephros development	0.0031 (6/1936)	0.0015 (47/31285)	0.0463739	0.982486	6	INHBE/transcript:ENST00000452281/GDF15/BMP6/INHBA/STAT1
CC	GO:0042764	ascospore-type prospore	0.0031 (6/1936)	0.0015 (47/31285)	0.0463739	0.982486	6	SEPT5/CDK18	transcript:ENST00000555408/transcript:ENST00000455843/transcript:ENST00000566631/CDK15
BP	GO:0001774	microglial cell activation	0.0114 (22/1936)	0.0085 (267/31285)	0.0464284	0.982486	22	FLT1/CARD16/TNF/CCR5/gene:ENSG00000259753/CCL8/FPR3/KCNJ3/CD300C/TLR4/CCL7/CMKLR1/TLR2/GPR1/C1QA/C1QB/IL20RB/C1QC/C5AR1	ITGA10/TRPV3/transcript:ENST00000504875
MF	GO:0038024	cargo receptor activity	0.0155 (30/1936)	0.0124 (388/31285)	0.0476877	0.982486	30	transcript:ENST00000538239/CD163/COL9A2/transcript:ENST00000588198/TNFAIP6/ROS1/RP11-407N17.3/FPR3/MRC1/transcript:ENST00000587251/CD36/transcript:ENST00000443875/CMKLR1/MERTK/GPR1/C1QA/C1QB/C1QC/C5AR1/transcript:ENST00000555873	CSMD3/COL13A1/transcript:ENST00000560014/COL17A1/CHODL/FBXL2/MIA2/CD6/transcript:ENST00000489656/ITGA10
BP	GO:0035441	cell migration involved in vasculogenesis	0.0041 (8/1936)	0.0023 (72/31285)	0.0479626	0.982486	8	FLT1/transcript:ENST00000520579/transcript:ENST00000445387	transcript:ENST00000431180/transcript:ENST00000334884/KMT2C/SEMA4G/transcript:ENST00000504875
BP	GO:0032765	positive regulation of mast cell cytokine production	0.0041 (8/1936)	0.0023 (72/31285)	0.0479626	0.982486	8	FCER1G/NR4A1/transcript:ENST00000483665/FLT1/FCGR1A	FCGR2A/transcript:ENST00000515800/transcript:ENST00000504875
MF	GO:0003697	single-stranded DNA binding	0.0258 (50/1936)	0.0224 (700/31285)	0.0479718	0.982486	50	TREX1/transcript:ENST00000482936/transcript:ENST00000511615/transcript:ENST00000307834/transcript:ENST00000475126/RBMS3/transcript:ENST00000465003/BIVM-ERCC5/transcript:ENST00000457179/transcript:ENST00000471308/transcript:ENST00000482007/transcript:ENST00000445387/transcript:ENST00000474964/TREX2/transcript:ENST00000558357/ISG20/transcript:ENST00000555178/HELZ2/transcript:ENST00000483148/RBM39/g…	transcript:ENST00000425046/ERCC5/transcript:ENST00000590558/transcript:ENST00000431534/gene:ENSG00000100101/transcript:ENST00000582981/transcript:ENST00000307849/transcript:ENST00000630114/transcript:ENST00000510815/transcript:ENST00000367667/transcript:ENST00000485479/RTEL1/transcript:ENST00000535558/transcript:ENST00000509126/transcript:ENST00000560014/transcript:ENST00000542140/transcript:ENST…
BP	GO:0023052	signaling	0.0201 (39/1936)	0.0168 (527/31285)	0.047973	0.982486	39	TRIB3/RASGRF2/CCL3/SSH3/CCNL1/transcript:ENST00000478046/CCR5/BTK/CCNO/CCL8/DLGAP1/DENND2D/transcript:ENST00000409403/gene:ENSG00000268975/GDF15/GPR35/transcript:ENST00000626154/HCK/CCL7/DUSP1/transcript:ENST00000536606/SLA/RAB33A/RASGEF1B/MERTK/CXCL8/transcript:ENST00000556575/transcript:ENST00000488340	transcript:ENST00000470121/ITK/transcript:ENST00000532881/transcript:ENST00000294737/transcript:ENST00000436958/transcript:ENST00000484049/transcript:ENST00000382240/transcript:ENST00000554308/transcript:ENST00000455997/CDKL5/DENND2A
CC	GO:0005685	U1 snRNP	0.0052 (10/1936)	0.0031 (98/31285)	0.0480459	0.982486	10	transcript:ENST00000401730/transcript:ENST00000600289/gene:ENSG00000255663/transcript:ENST00000475126	transcript:ENST00000456182/transcript:ENST00000424478/transcript:ENST00000439775/LSM4/transcript:ENST00000601065/transcript:ENST00000426094
BP	GO:0070857	regulation of bile acid biosynthetic process	0.0052 (10/1936)	0.0031 (98/31285)	0.0480459	0.982486	10	CES1/NR1I3/VDR/FLT1/MERTK/CES3/transcript:ENST00000593532/ROS1	transcript:ENST00000482958/transcript:ENST00000504875
BP	GO:0036120	cellular response to platelet-derived growth factor stimulus	0.0217 (42/1936)	0.0183 (574/31285)	0.0481165	0.982486	42	VDR/FLT1/ROS1/transcript:ENST00000421674/CCL3/ECM2/MMP9/IQGAP2/DCN/transcript:ENST00000528516/gene:ENSG00000259753/BTK/CCNO/transcript:ENST00000616321/CCL8/MRC1/GJD3/transcript:ENST00000520579/TLR4/HCK/HAS1/transcript:ENST00000394606/CCL7/C8orf44-SGK3/SLA/transcript:ENST00000545888/TLR2/transcript:ENST00000593532/EPB41L3/ADGRA2	LRRTM4/transcript:ENST00000515800/ITK/SYNGAP1/RP11-47I22.4/transcript:ENST00000414983/transcript:ENST00000559133/LRRC17/transcript:ENST00000420201/transcript:ENST00000633485/transcript:ENST00000592705/transcript:ENST00000504875
BP	GO:0061037	negative regulation of cartilage development	0.0062 (12/1936)	0.0040 (125/31285)	0.0482113	0.982486	12	NR4A1/NR1I3/JUP/VDR/CTSZ/MMP12/MMP9/GDF15/transcript:ENST00000522484/MRC1/CTSH/MMP3
BP	GO:0150074	positive regulation of protein-glutamine gamma-glutamyltransferase activity	0.0015 (3/1936)	0.0005 (15/31285)	0.0482651	0.982486	3	HRASLS/FAM84B/RARRES3
BP	GO:0106096	response to ceramide	0.0015 (3/1936)	0.0005 (15/31285)	0.0482651	0.982486	3	transcript:ENST00000520579/FLT1	transcript:ENST00000504875
BP	GO:0072275	metanephric glomerulus morphogenesis	0.0015 (3/1936)	0.0005 (15/31285)	0.0482651	0.982486	3	transcript:ENST00000520579/FLT1	transcript:ENST00000504875
MF	GO:0043812	phosphatidylinositol-4-phosphate phosphatase activity	0.0015 (3/1936)	0.0005 (15/31285)	0.0482651	0.982486	3	INPP5J/transcript:ENST00000441228	transcript:ENST00000455997
BP	GO:1903278	positive regulation of sodium ion export across plasma membrane	0.0015 (3/1936)	0.0005 (15/31285)	0.0482651	0.982486	3	FXYD6	transcript:ENST00000466678/transcript:ENST00000465172
MF	GO:0002113	interleukin-33 binding	0.0015 (3/1936)	0.0005 (15/31285)	0.0482651	0.982486	3	IL18R1/TLR2/IL1RL1
BP	GO:0038185	nuclear receptor-mediated bile acid signaling pathway	0.0015 (3/1936)	0.0005 (15/31285)	0.0482651	0.982486	3	transcript:ENST00000593532/NR1I3/VDR
MF	GO:0002114	interleukin-33 receptor activity	0.0015 (3/1936)	0.0005 (15/31285)	0.0482651	0.982486	3	IL18R1/TLR2/IL1RL1
BP	GO:0060981	cell migration involved in coronary angiogenesis	0.0015 (3/1936)	0.0005 (15/31285)	0.0482651	0.982486	3	transcript:ENST00000520579/FLT1	transcript:ENST00000504875
BP	GO:0097531	mast cell migration	0.0015 (3/1936)	0.0005 (15/31285)	0.0482651	0.982486	3	transcript:ENST00000607882/transcript:ENST00000452281/STAT1
MF	GO:0034596	phosphatidylinositol phosphate 4-phosphatase activity	0.0015 (3/1936)	0.0005 (15/31285)	0.0482651	0.982486	3	INPP5J/transcript:ENST00000441228	transcript:ENST00000455997
BP	GO:1905695	positive regulation of phosphatidic acid biosynthetic process	0.0015 (3/1936)	0.0005 (15/31285)	0.0482651	0.982486	3	transcript:ENST00000593532/NR1I3/VDR
BP	GO:0006742	NADP catabolic process	0.0015 (3/1936)	0.0005 (15/31285)	0.0482651	0.982486	3	NCF4/NCF1/PSTPIP1
MF	GO:0005017	platelet-derived growth factor receptor activity	0.0015 (3/1936)	0.0005 (15/31285)	0.0482651	0.982486	3	transcript:ENST00000520579/FLT1	transcript:ENST00000504875
BP	GO:0072223	metanephric glomerular mesangium development	0.0015 (3/1936)	0.0005 (15/31285)	0.0482651	0.982486	3	transcript:ENST00000520579/FLT1	transcript:ENST00000504875
MF	GO:0052890	oxidoreductase activity, acting on the CH-CH group of donors, with a flavin as acceptor	0.0015 (3/1936)	0.0005 (15/31285)	0.0482651	0.982486	3	transcript:ENST00000481262/transcript:ENST00000583858	ACADVL
BP	GO:0035789	metanephric mesenchymal cell migration	0.0015 (3/1936)	0.0005 (15/31285)	0.0482651	0.982486	3	transcript:ENST00000520579/FLT1	transcript:ENST00000504875
BP	GO:2001250	positive regulation of ammonia assimilation cycle	0.0015 (3/1936)	0.0005 (15/31285)	0.0482651	0.982486	3	transcript:ENST00000593532/NR1I3/VDR
BP	GO:0034255	regulation of urea metabolic process	0.0015 (3/1936)	0.0005 (15/31285)	0.0482651	0.982486	3	transcript:ENST00000593532/NR1I3/VDR
MF	GO:1902122	chenodeoxycholic acid binding	0.0015 (3/1936)	0.0005 (15/31285)	0.0482651	0.982486	3	transcript:ENST00000593532/NR1I3/VDR
MF	GO:0001618	virus receptor activity	0.0284 (55/1936)	0.0249 (780/31285)	0.0483829	0.982486	55	transcript:ENST00000460679/transcript:ENST00000538239/CD163/CDKL3/transcript:ENST00000492414/ANPEP/transcript:ENST00000588198/transcript:ENST00000407982/ROS1/SERPINB2/SLC7A11/CCR5/gene:ENSG00000259753/transcript:ENST00000489775/SIGLEC1/transcript:ENST00000375290/CLDN1/FPR3/MRC1/transcript:ENST00000587251/CD300C/GPR35/CLEC12A/CD4/CD36/PAPPA2/transcript:ENST00000325960/SLC7A7/SLC1A4/MERTK/CXCR4/PLS…	CD300LB/PTCH1/transcript:ENST00000553819/CSMD3/CDK15/transcript:ENST00000478361/CDHR3/transcript:ENST00000566631/transcript:ENST00000496664/transcript:ENST00000555408/CHODL/NCAM2/transcript:ENST00000530726/transcript:ENST00000508798/CDKL5/FCGR2A/transcript:ENST00000485036/CD6/ITGA10
BP	GO:0051304	chromosome separation	0.0046 (9/1936)	0.0027 (85/31285)	0.0484278	0.982486	9	transcript:ENST00000558357/transcript:ENST00000526463/transcript:ENST00000457179/transcript:ENST00000504325	transcript:ENST00000584582/transcript:ENST00000564136/transcript:ENST00000582981/transcript:ENST00000503494/transcript:ENST00000532132
BP	GO:0010447	response to acidic pH	0.0134 (26/1936)	0.0105 (328/31285)	0.0484933	0.982486	26	CTSZ/TNFAIP6/ATP11A/ARHGAP40/ROS1/BTK/MRC1/GPR35/HCK/transcript:ENST00000425141/CTSH/gene:ENSG00000268400/SLA/ATP8B3/MERTK/ARHGAP9/SERPING1	GLS/PLXNA4/ITK/SLC4A4/SLC9A7/transcript:ENST00000417154/ATP8A1/transcript:ENST00000544041/SLC4A3
BP	GO:0090548	response to nitrate starvation	0.0021 (4/1936)	0.0008 (25/31285)	0.0485992	0.982486	4	transcript:ENST00000445387/IRAK3	transcript:ENST00000431180/transcript:ENST00000568004
BP	GO:2001125	negative regulation of translational frameshifting	0.0021 (4/1936)	0.0008 (25/31285)	0.0485992	0.982486	4	RP11-385D13.1/transcript:ENST00000504325/transcript:ENST00000511473	transcript:ENST00000503494
BP	GO:1902524	positive regulation of protein K48-linked ubiquitination	0.0021 (4/1936)	0.0008 (25/31285)	0.0485992	0.982486	4	transcript:ENST00000540424/transcript:ENST00000541960/IFI35/transcript:ENST00000570856
BP	GO:1902164	positive regulation of DNA damage response, signal transduction by p53 class mediator resulting in transcription of p21 class mediator	0.0021 (4/1936)	0.0008 (25/31285)	0.0485992	0.982486	4	transcript:ENST00000488381/MNDA	ZNF385D/gene:ENSG00000263809
BP	GO:0042413	carnitine catabolic process	0.0021 (4/1936)	0.0008 (25/31285)	0.0485992	0.982486	4	transcript:ENST00000481262/transcript:ENST00000583858	ECI2/ACADVL
BP	GO:2000211	regulation of glutamate metabolic process	0.0021 (4/1936)	0.0008 (25/31285)	0.0485992	0.982486	4	SLC7A7/SLC7A11/SLC7A5	gene:ENSG00000258864
BP	GO:0002154	thyroid hormone receptor signaling pathway	0.0021 (4/1936)	0.0008 (25/31285)	0.0485992	0.982486	4	transcript:ENST00000593532/transcript:ENST00000577831/NR1I3/VDR
BP	GO:0030730	sequestering of triglyceride	0.0021 (4/1936)	0.0008 (25/31285)	0.0485992	0.982486	4	IL1RN/TNF/IL1B	transcript:ENST00000513998
MF	GO:0000774	adenyl-nucleotide exchange factor activity	0.0021 (4/1936)	0.0008 (25/31285)	0.0485992	0.982486	4	transcript:ENST00000468323/transcript:ENST00000379707	transcript:ENST00000498169/transcript:ENST00000460404
MF	GO:0051434	BH3 domain binding	0.0021 (4/1936)	0.0008 (25/31285)	0.0485992	0.982486	4	transcript:ENST00000504325/transcript:ENST00000511473	BCL2L2-PABPN1/transcript:ENST00000503494
BP	GO:0002468	dendritic cell antigen processing and presentation	0.0021 (4/1936)	0.0008 (25/31285)	0.0485992	0.982486	4	FCGR1A/transcript:ENST00000483665/MPEG1	FCGR2A
BP	GO:0110091	negative regulation of hippocampal neuron apoptotic process	0.0021 (4/1936)	0.0008 (25/31285)	0.0485992	0.982486	4	CCL8/CCL7/PTGDS/CCR5
BP	GO:0046074	dTMP catabolic process	0.0021 (4/1936)	0.0008 (25/31285)	0.0485992	0.982486	4	NT5C3A/TYMP	transcript:ENST00000580758/transcript:ENST00000456458
BP	GO:0006304	DNA modification	0.0021 (4/1936)	0.0008 (25/31285)	0.0485992	0.982486	4	TREX2/CYP1A1/TREX1	transcript:ENST00000522610
BP	GO:0070430	positive regulation of nucleotide-binding oligomerization domain containing 1 signaling pathway	0.0021 (4/1936)	0.0008 (25/31285)	0.0485992	0.982486	4	TLR4/transcript:ENST00000541505/SLC15A3/TLR2
MF	GO:0031731	CCR6 chemokine receptor binding	0.0021 (4/1936)	0.0008 (25/31285)	0.0485992	0.982486	4	CCL8/CCL7/CCL20/CCL3
CC	GO:1990184	amino acid transport complex	0.0021 (4/1936)	0.0008 (25/31285)	0.0485992	0.982486	4	SLC3A2/SLC7A7/SLC7A11/SLC7A5
BP	GO:0046653	tetrahydrofolate metabolic process	0.0026 (5/1936)	0.0012 (36/31285)	0.0489702	0.982486	5	transcript:ENST00000557348/transcript:ENST00000553837/transcript:ENST00000557433/transcript:ENST00000555563	transcript:ENST00000556825
BP	GO:0071038	TRAMP-dependent tRNA surveillance pathway	0.0026 (5/1936)	0.0012 (36/31285)	0.0489702	0.982486	5	HELZ2/EXOSC6/transcript:ENST00000357464/DDX60	transcript:ENST00000465229
MF	GO:1903924	estradiol binding	0.0026 (5/1936)	0.0012 (36/31285)	0.0489702	0.982486	5	NR4A1/AP000304.12/ESR1	DHRS9/RDH5
BP	GO:1905820	positive regulation of chromosome separation	0.0026 (5/1936)	0.0012 (36/31285)	0.0489702	0.982486	5	transcript:ENST00000489775/PLSCR1	transcript:ENST00000525964/transcript:ENST00000534532/transcript:ENST00000432615
BP	GO:0030593	neutrophil chemotaxis	0.0238 (46/1936)	0.0204 (638/31285)	0.0492729	0.982486	46	FCER1G/transcript:ENST00000460679/transcript:ENST00000483665/RASGRP3/LILRB2/C5AR1/CXCL3/CCL3/CCR5/transcript:ENST00000429888/gene:ENSG00000259753/transcript:ENST00000472580/CCL8/FPR3/IL1RN/CD300C/GDF15/CXCL5/CXCL2/FCGR1A/CCL7/transcript:ENST00000495564/CMKLR1/C8orf44-SGK3/LGALS9/GPR1/transcript:ENST00000610164/CXCR4/CXCL8/transcript:ENST00000512070/UNC13D/IL1B/CCL20	CD300LB/transcript:ENST00000515800/SYTL5/PDE3A/NOSTRIN/RP11-47I22.4/transcript:ENST00000426902/transcript:ENST00000415933/LEPR/gene:ENSG00000273167/PDE11A/FCGR2A/ITGA10
BP	GO:0003266	regulation of secondary heart field cardioblast proliferation	0.0036 (7/1936)	0.0019 (60/31285)	0.0498709	0.982486	7	JUP/MSC/transcript:ENST00000435201/LMO1/HES1/HEY1/transcript:ENST00000558656
BP	GO:0007021	tubulin complex assembly	0.0036 (7/1936)	0.0019 (60/31285)	0.0498709	0.982486	7	transcript:ENST00000550010/transcript:ENST00000618568/transcript:ENST00000434055	transcript:ENST00000415891/transcript:ENST00000538530/DCTN1/CCT2
BP	GO:0034755	iron ion transmembrane transport	0.0036 (7/1936)	0.0019 (60/31285)	0.0498709	0.982486	7	CD163/C1QA/transcript:ENST00000588198/C1QB/C1QC/transcript:ENST00000587251	CD6
BP	GO:0048640	negative regulation of developmental growth	0.0036 (7/1936)	0.0019 (60/31285)	0.0498709	0.982486	7	FLT1/MERTK/TRIB3/IGFBP1/IGFBP3/ROS1	transcript:ENST00000504875
MF	GO:0090556	phosphatidylserine floppase activity	0.0036 (7/1936)	0.0019 (60/31285)	0.0498709	0.982486	7	ATP8B3/ABCA5/ABCA10/ATP11A	transcript:ENST00000586995/ATP8A1/transcript:ENST00000531925
BP	GO:0006911	phagocytosis, engulfment	0.0243 (47/1936)	0.0209 (655/31285)	0.0505226	0.982486	47	FCER1G/NR1I3/CD163/VDR/SCARF1/transcript:ENST00000483665/COL9A2/LILRB2/transcript:ENST00000588198/MYO1G/ARHGAP40/UNC5B/MYO1F/NCF4/ARHGAP4/ABCA10/FMNL3/gene:ENSG00000259753/SIGLEC1/transcript:ENST00000495242/transcript:ENST00000587251/CD300C/CLEC12A/CD36/ABCA5/FCGR1A/transcript:ENST00000495564/ARHGAP30/MYO15B/transcript:ENST00000593532/transcript:ENST00000467800/C1QA/PSTPIP1/ARHGAP9/C1QB/THSD7A/C1…	transcript:ENST00000515800/COL13A1/transcript:ENST00000586995/COL17A1/AL513122.2/transcript:ENST00000573196/transcript:ENST00000466227/FCGR2A/CD6/ITGA10
MF	GO:0005283	amino acid:sodium symporter activity	0.0031 (6/1936)	0.0015 (48/31285)	0.050589	0.982486	6	SLC1A4/SLC6A9	transcript:ENST00000566598/SLC38A6/transcript:ENST00000549258/SLC38A4
MF	GO:0008509	monoatomic anion transmembrane transporter activity	0.0031 (6/1936)	0.0015 (48/31285)	0.050589	0.982486	6	SLC1A4/transcript:ENST00000425141	SLC26A7/SLC26A4/SLC4A3/SLC4A4
CC	GO:0000325	plant-type vacuole	0.0455 (88/1936)	0.0421 (1318/31285)	0.0507158	0.982486	88	transcript:ENST00000442122/CBS/CTSZ/MX2/transcript:ENST00000412494/SLC7A5/LRRK1/ADAP2/transcript:ENST00000443963/ATP6V0D2/transcript:ENST00000612061/transcript:ENST00000541505/ATP8B3/MYO15B/transcript:ENST00000557087/RP11-468E2.1/transcript:ENST00000311943/transcript:ENST00000472580/transcript:ENST00000558161/DYSF/SLC7A7/RAB33A/ENTPD1/transcript:ENST00000635811/transcript:ENST00000465407/ABCA10/t…	CLIC2/gene:ENSG00000263809/transcript:ENST00000415933/transcript:ENST00000586995/transcript:ENST00000544223/transcript:ENST00000565875/transcript:ENST00000530170/transcript:ENST00000530721/transcript:ENST00000458140/SLC9A7/SLC29A2/transcript:ENST00000569365/transcript:ENST00000560014/transcript:ENST00000354291/transcript:ENST00000617103/RNF43/transcript:ENST00000529920/SLC38A6/transcript:ENST0000…
BP	GO:0009597	detection of virus	0.0052 (10/1936)	0.0032 (99/31285)	0.0508791	0.982486	10	LILRA5/TLR2/TLR4/LILRB2/LILRA6/IFIH1/DHX58/LILRB4/OSCAR	LRRTM4
BP	GO:1990791	dorsal root ganglion development	0.0052 (10/1936)	0.0032 (99/31285)	0.0508791	0.982486	10	JUP/RASGEF1B/transcript:ENST00000590388/UNC5B/RASGRF2/transcript:ENST00000605457	transcript:ENST00000555609/RGS17/transcript:ENST00000586810/RGS4
BP	GO:0038109	Kit signaling pathway	0.0041 (8/1936)	0.0023 (73/31285)	0.0513352	0.982486	8	LRRK1/FLT1/SH2D3C/BTK/transcript:ENST00000607882/ROS1	ITK/transcript:ENST00000504875
CC	GO:0035145	exon-exon junction complex	0.0041 (8/1936)	0.0023 (73/31285)	0.0513352	0.982486	8	transcript:ENST00000443963/HELZ2/transcript:ENST00000401730/transcript:ENST00000534269/transcript:ENST00000545236	transcript:ENST00000527613/transcript:ENST00000533164/transcript:ENST00000601065
BP	GO:0033004	negative regulation of mast cell activation	0.0041 (8/1936)	0.0023 (73/31285)	0.0513352	0.982486	8	LILRA5/CD300C/LILRB2/SLAMF7/LILRB4/transcript:ENST00000607882/LILRA6	CD300LB
BP	GO:0007313	maternal specification of dorsal/ventral axis, oocyte, soma encoded	0.0041 (8/1936)	0.0023 (73/31285)	0.0513352	0.982486	8	INHBE/GDF15/transcript:ENST00000483364/BMP6/TNFAIP6/C1R/transcript:ENST00000443875	CSMD3
BP	GO:0032819	positive regulation of natural killer cell proliferation	0.0046 (9/1936)	0.0027 (86/31285)	0.0515176	0.982486	9	EBI3/transcript:ENST00000452281/transcript:ENST00000483665/STAT1/HLA-F/FCGR1A/ULBP1/HLA-C	FCGR2A
BP	GO:0031328	positive regulation of cellular biosynthetic process	0.0046 (9/1936)	0.0027 (86/31285)	0.0515176	0.982486	9	IL6/CXCL5/CXCL8/IL12A/CXCL3/CXCL2/CCL8/CCL7/CCL3
BP	GO:2000147	positive regulation of cell motility	0.0170 (33/1936)	0.0140 (437/31285)	0.0516399	0.982486	33	FLT1/transcript:ENST00000443687/ATP11A/CCL3/MYO1F/MSC/CCR5/RPS6KA2/CCL8/CLDN1/TACSTD2/transcript:ENST00000507218/CCL7/NTNG2/C8orf44-SGK3/ATP8B3/C1QA/CXCR4/C1QB/transcript:ENST00000556575/CLDN7/C1QC/CCL20	SLC26A7/transcript:ENST00000419510/RP11-47I22.4/EFCAB1/SLC26A4/transcript:ENST00000573196/transcript:ENST00000466227/MAP2K3/ATP8A1/transcript:ENST00000504875
BP	GO:0045653	negative regulation of megakaryocyte differentiation	0.0057 (11/1936)	0.0036 (113/31285)	0.0524105	0.982486	11	transcript:ENST00000618193/transcript:ENST00000612061/EHF/FLI1/CXCL5/CXCL8/transcript:ENST00000621520/CXCL3/CXCL2	transcript:ENST00000547146/ELF5
BP	GO:1901532	regulation of hematopoietic progenitor cell differentiation	0.0057 (11/1936)	0.0036 (113/31285)	0.0524105	0.982486	11	NR4A1/transcript:ENST00000460679/NR1I3/VDR/FLT1/transcript:ENST00000520579/PGF/transcript:ENST00000545869	transcript:ENST00000382240/transcript:ENST00000485036/transcript:ENST00000504875
BP	GO:0097242	amyloid-beta clearance	0.0108 (21/1936)	0.0082 (256/31285)	0.0527274	0.982486	21	transcript:ENST00000538239/CD163/COL9A2/transcript:ENST00000588198/ROS1/gene:ENSG00000259753/FPR3/transcript:ENST00000587251/CD300C/CMKLR1/MERTK/GPR1/C1QA/C1QB/C1QC/C5AR1	transcript:ENST00000478361/COL13A1/COL17A1/CD6/ITGA10
BP	GO:1903392	negative regulation of adherens junction organization	0.0036 (7/1936)	0.0019 (61/31285)	0.0537292	0.982486	7	INHBE/GDF15/BMP6/PGF/EPB41L3/INHBA/transcript:ENST00000421674
BP	GO:1990926	short-term synaptic potentiation	0.0036 (7/1936)	0.0019 (61/31285)	0.0537292	0.982486	7	SYTL1/SYT7/PLA2G4B/UNC13D	JMJD7-PLA2G4B/SYTL2/SYTL5
MF	GO:0140326	ATPase-coupled intramembrane lipid transporter activity	0.0036 (7/1936)	0.0019 (61/31285)	0.0537292	0.982486	7	ATP8B3/ABCA5/ABCA10/ATP11A	transcript:ENST00000586995/ATP8A1/transcript:ENST00000531925
BP	GO:0010626	negative regulation of Schwann cell proliferation	0.0052 (10/1936)	0.0032 (100/31285)	0.0538214	0.982486	10	EPB41L3/transcript:ENST00000380189/IFIH1/transcript:ENST00000538796/transcript:ENST00000421674/DHX58	SYNGAP1/transcript:ENST00000485036/SOX7/transcript:ENST00000547787
MF	GO:0008429	phosphatidylethanolamine binding	0.0052 (10/1936)	0.0032 (100/31285)	0.0538214	0.982486	10	transcript:ENST00000541960/CD300C/SYTL1/transcript:ENST00000570856/transcript:ENST00000540424	CD300LB/SYNGAP1/SYTL2/SYTL5/transcript:ENST00000560014
MF	GO:0034186	apolipoprotein A-I binding	0.0026 (5/1936)	0.0012 (37/31285)	0.0541134	0.982486	5	CD300C/ABCA5/ABCA10/CD36	transcript:ENST00000586995
BP	GO:0002269	leukocyte activation involved in inflammatory response	0.0026 (5/1936)	0.0012 (37/31285)	0.0541134	0.982486	5	CXCL5/CXCL8/CXCL3/CXCL2	transcript:ENST00000513998
BP	GO:1904151	positive regulation of microglial cell mediated cytotoxicity	0.0026 (5/1936)	0.0012 (37/31285)	0.0541134	0.982486	5	TYROBP/EHF/STAP2	ITGA10/ELF5
MF	GO:0106411	XMP 5'-nucleosidase activity	0.0026 (5/1936)	0.0012 (37/31285)	0.0541134	0.982486	5	NT5C3A/transcript:ENST00000452156	transcript:ENST00000531547/transcript:ENST00000456458/ACPP
BP	GO:0050689	negative regulation of defense response to virus by host	0.0026 (5/1936)	0.0012 (37/31285)	0.0541134	0.982486	5	PRKRA/transcript:ENST00000452156/HLA-F/HLA-C	transcript:ENST00000424699
BP	GO:0048635	negative regulation of muscle organ development	0.0026 (5/1936)	0.0012 (37/31285)	0.0541134	0.982486	5	IL6/HES1/transcript:ENST00000375290/HEY1	PTCH1
MF	GO:0030695	GTPase regulator activity	0.0108 (21/1936)	0.0082 (257/31285)	0.0545202	0.982486	21	RINL/RAP1GAP/GPSM3/ARHGAP40/RASGRF2/SYTL1/IQGAP2/TBC1D3G/transcript:ENST00000495242/GBP5/GBP4/RASGEF1B	transcript:ENST00000580033/SYTL5/NOSTRIN/RGS17/RGS4/transcript:ENST00000633485/SYTL2/transcript:ENST00000330168/transcript:ENST00000453535
BP	GO:2001301	lipoxin biosynthetic process	0.0010 (2/1936)	0.0002 (7/31285)	0.0546466	0.982486	2	ALOXE3/ALOX5
BP	GO:0080052	response to histidine	0.0010 (2/1936)	0.0002 (7/31285)	0.0546466	0.982486	2	transcript:ENST00000541505/SLC15A3
BP	GO:0030397	membrane disassembly	0.0010 (2/1936)	0.0002 (7/31285)	0.0546466	0.982486	2	HRASLS/RARRES3
BP	GO:1901753	leukotriene A4 biosynthetic process	0.0010 (2/1936)	0.0002 (7/31285)	0.0546466	0.982486	2	ALOXE3/ALOX5
MF	GO:0008496	mannan endo-1,6-alpha-mannosidase activity	0.0010 (2/1936)	0.0002 (7/31285)	0.0546466	0.982486	2	transcript:ENST00000558161/transcript:ENST00000560451
MF	GO:0052720	class II DNA-(apurinic or apyrimidinic site) endonuclease activity	0.0010 (2/1936)	0.0002 (7/31285)	0.0546466	0.982486	2	transcript:ENST00000547173	transcript:ENST00000547475
BP	GO:0106167	extracellular ATP signaling	0.0010 (2/1936)	0.0002 (7/31285)	0.0546466	0.982486	2	transcript:ENST00000574951	FBXL2
BP	GO:0045201	maintenance of neuroblast polarity	0.0010 (2/1936)	0.0002 (7/31285)	0.0546466	0.982486	2	transcript:ENST00000616467	transcript:ENST00000482010
BP	GO:0080053	response to phenylalanine	0.0010 (2/1936)	0.0002 (7/31285)	0.0546466	0.982486	2	transcript:ENST00000541505/SLC15A3
BP	GO:1904177	regulation of adipose tissue development	0.0010 (2/1936)	0.0002 (7/31285)	0.0546466	0.982486	2	HRASLS/RARRES3
CC	GO:0008537	proteasome activator complex	0.0010 (2/1936)	0.0002 (7/31285)	0.0546466	0.982486	2	transcript:ENST00000543428/transcript:ENST00000560370
BP	GO:0035781	CD86 biosynthetic process	0.0010 (2/1936)	0.0002 (7/31285)	0.0546466	0.982486	2	TREX2/TREX1
MF	GO:0047173	phosphatidylcholine-retinol O-acyltransferase activity	0.0010 (2/1936)	0.0002 (7/31285)	0.0546466	0.982486	2	HRASLS/RARRES3
BP	GO:1904205	negative regulation of skeletal muscle hypertrophy	0.0010 (2/1936)	0.0002 (7/31285)	0.0546466	0.982486	2	IGFBP3/IGFBP1
BP	GO:1904482	cellular response to tetrahydrofolate	0.0010 (2/1936)	0.0002 (7/31285)	0.0546466	0.982486	2	transcript:ENST00000557433/transcript:ENST00000553837
BP	GO:2000900	cyclodextrin metabolic process	0.0010 (2/1936)	0.0002 (7/31285)	0.0546466	0.982486	2	transcript:ENST00000375290	PTCH1
CC	GO:0061826	podosome ring	0.0010 (2/1936)	0.0002 (7/31285)	0.0546466	0.982486	2		transcript:ENST00000414983/transcript:ENST00000420201
MF	GO:0032358	oxidized pyrimidine DNA binding	0.0010 (2/1936)	0.0002 (7/31285)	0.0546466	0.982486	2		transcript:ENST00000530721/transcript:ENST00000530170
MF	GO:0102279	obsolete lecithin:11-cis retinol acyltransferase activity	0.0010 (2/1936)	0.0002 (7/31285)	0.0546466	0.982486	2	HRASLS/RARRES3
MF	GO:0015042	trypanothione-disulfide reductase (NADPH) activity	0.0010 (2/1936)	0.0002 (7/31285)	0.0546466	0.982486	2	transcript:ENST00000474308	transcript:ENST00000527688
BP	GO:0042823	pyridoxal phosphate biosynthetic process	0.0010 (2/1936)	0.0002 (7/31285)	0.0546466	0.982486	2	PSAT1/transcript:ENST00000583245
BP	GO:0006675	mannosyl-inositol phosphorylceramide metabolic process	0.0010 (2/1936)	0.0002 (7/31285)	0.0546466	0.982486	2	CH25H	transcript:ENST00000530122
MF	GO:0016416	O-palmitoyltransferase activity	0.0010 (2/1936)	0.0002 (7/31285)	0.0546466	0.982486	2	HRASLS/RARRES3
BP	GO:0021944	neuronal-glial interaction involved in hindbrain glial-mediated radial cell migration	0.0010 (2/1936)	0.0002 (7/31285)	0.0546466	0.982486	2		transcript:ENST00000466678/transcript:ENST00000465172
BP	GO:0036245	cellular response to menadione	0.0010 (2/1936)	0.0002 (7/31285)	0.0546466	0.982486	2	transcript:ENST00000474308	transcript:ENST00000527688
BP	GO:0045911	positive regulation of DNA recombination	0.0010 (2/1936)	0.0002 (7/31285)	0.0546466	0.982486	2	transcript:ENST00000312087	transcript:ENST00000353275
BP	GO:0120036	plasma membrane bounded cell projection organization	0.0010 (2/1936)	0.0002 (7/31285)	0.0546466	0.982486	2		transcript:ENST00000466678/transcript:ENST00000465172
BP	GO:0002100	tRNA wobble adenosine to inosine editing	0.0010 (2/1936)	0.0002 (7/31285)	0.0546466	0.982486	2	transcript:ENST00000492414	transcript:ENST00000496664
MF	GO:0003839	gamma-glutamylcyclotransferase activity	0.0010 (2/1936)	0.0002 (7/31285)	0.0546466	0.982486	2	CHAC1	transcript:ENST00000440082
CC	GO:0070421	DNA ligase III-XRCC1 complex	0.0010 (2/1936)	0.0002 (7/31285)	0.0546466	0.982486	2	transcript:ENST00000601091/transcript:ENST00000594759
MF	GO:0015334	high-affinity oligopeptide transmembrane transporter activity	0.0010 (2/1936)	0.0002 (7/31285)	0.0546466	0.982486	2	transcript:ENST00000541505/SLC15A3
BP	GO:0061481	response to TNF agonist	0.0010 (2/1936)	0.0002 (7/31285)	0.0546466	0.982486	2		transcript:ENST00000530721/transcript:ENST00000530170
MF	GO:0004052	arachidonate 12(S)-lipoxygenase activity	0.0010 (2/1936)	0.0002 (7/31285)	0.0546466	0.982486	2	ALOXE3/ALOX5
BP	GO:0140509	epithelium-like organization	0.0010 (2/1936)	0.0002 (7/31285)	0.0546466	0.982486	2	IQGAP2	transcript:ENST00000633485
BP	GO:0046228	2,4,5-trichlorophenoxyacetic acid catabolic process	0.0010 (2/1936)	0.0002 (7/31285)	0.0546466	0.982486	2	transcript:ENST00000474308	transcript:ENST00000527688
MF	GO:0106155	peptidyl-lysine 3-dioxygenase activity	0.0010 (2/1936)	0.0002 (7/31285)	0.0546466	0.982486	2		transcript:ENST00000487292/JMJD7-PLA2G4B
MF	GO:0070336	flap-structured DNA binding	0.0010 (2/1936)	0.0002 (7/31285)	0.0546466	0.982486	2	DHX58/IFIH1
BP	GO:0071501	cellular response to sterol depletion	0.0010 (2/1936)	0.0002 (7/31285)	0.0546466	0.982486	2	transcript:ENST00000375290	PTCH1
MF	GO:0050137	NADPH peroxidase activity	0.0010 (2/1936)	0.0002 (7/31285)	0.0546466	0.982486	2	transcript:ENST00000474308	transcript:ENST00000527688
MF	GO:0033983	diaminobutyrate decarboxylase activity	0.0010 (2/1936)	0.0002 (7/31285)	0.0546466	0.982486	2	GAD1	transcript:ENST00000493875
MF	GO:0036403	arachidonate 8(S)-lipoxygenase activity	0.0010 (2/1936)	0.0002 (7/31285)	0.0546466	0.982486	2	ALOXE3/ALOX5
BP	GO:0042078	germ-line stem cell division	0.0046 (9/1936)	0.0028 (87/31285)	0.0547337	0.982486	9	INHBE/GDF15/MERTK/BMP6/IFIH1/ROS1/DHX58/transcript:ENST00000374754	transcript:ENST00000611848
BP	GO:0010575	positive regulation of vascular endothelial growth factor production	0.0114 (22/1936)	0.0087 (272/31285)	0.0547625	0.982486	22	FLT1/IL6/C5AR1/PTGS2/LMO1/transcript:ENST00000558656/FPR3/IL1RN/transcript:ENST00000452281/GDF15/BMP6/STAT1/CMKLR1/IL1A/CYP1A1/GPR1/transcript:ENST00000435201/IL1B	transcript:ENST00000461221/ADORA2A/LEPR/transcript:ENST00000504875
BP	GO:0010886	positive regulation of cholesterol storage	0.0041 (8/1936)	0.0024 (74/31285)	0.0548569	0.982486	8	transcript:ENST00000424354/PNLIPRP3/CD163/transcript:ENST00000588198/CD36/C1QA/transcript:ENST00000587251	CD6
BP	GO:0046688	response to copper ion	0.0124 (24/1936)	0.0097 (302/31285)	0.0548673	0.982486	24	CDKL3/CD163/transcript:ENST00000588198/ESR1/PNLIPRP3/LRRK1/transcript:ENST00000583858/ATP6V0D2/transcript:ENST00000587251/CYP27B1/DUSP1/IL1A/transcript:ENST00000526129/transcript:ENST00000561852/CDK18/transcript:ENST00000481262	ACADVL/CDK15/transcript:ENST00000566631/transcript:ENST00000555408/BCL2L2-PABPN1/MAP2K3/CDKL5/CD6
BP	GO:1905534	positive regulation of L-leucine import across plasma membrane	0.0021 (4/1936)	0.0008 (26/31285)	0.0549797	0.982486	4	RAP1GAP/SLC7A11/SLC7A7/SLC7A5
BP	GO:0019254	carnitine metabolic process, CoA-linked	0.0021 (4/1936)	0.0008 (26/31285)	0.0549797	0.982486	4	transcript:ENST00000526129/transcript:ENST00000481262/transcript:ENST00000583858	ACADVL
BP	GO:0042883	cysteine transport	0.0021 (4/1936)	0.0008 (26/31285)	0.0549797	0.982486	4	SLC1A4/SLC7A7/SLC7A11/SLC7A5
BP	GO:1903810	L-histidine import across plasma membrane	0.0021 (4/1936)	0.0008 (26/31285)	0.0549797	0.982486	4	SLC7A7/SLC7A11	SLC38A4/SLC38A6
BP	GO:0035188	hatching	0.0021 (4/1936)	0.0008 (26/31285)	0.0549797	0.982486	4	transcript:ENST00000483364/NR1I3/VDR/transcript:ENST00000593532
BP	GO:0010036	response to boron-containing substance	0.0021 (4/1936)	0.0008 (26/31285)	0.0549797	0.982486	4	MX2/MX1	SLC4A3/SLC4A4
MF	GO:0032089	NACHT domain binding	0.0021 (4/1936)	0.0008 (26/31285)	0.0549797	0.982486	4	RP11-385D13.1/transcript:ENST00000587339	transcript:ENST00000518622/transcript:ENST00000519646
BP	GO:0060264	regulation of respiratory burst involved in inflammatory response	0.0021 (4/1936)	0.0008 (26/31285)	0.0549797	0.982486	4	NCF4/NCF1/transcript:ENST00000495564/PSTPIP1
BP	GO:0075016	appressorium formation	0.0021 (4/1936)	0.0008 (26/31285)	0.0549797	0.982486	4	transcript:ENST00000540424/transcript:ENST00000541960/transcript:ENST00000570856	transcript:ENST00000566631
MF	GO:0032405	MutLalpha complex binding	0.0021 (4/1936)	0.0008 (26/31285)	0.0549797	0.982486	4	TREX2/transcript:ENST00000312087/TREX1	transcript:ENST00000353275
CC	GO:0140275	MIB complex	0.0021 (4/1936)	0.0008 (26/31285)	0.0549797	0.982486	4		transcript:ENST00000409258/transcript:ENST00000504902/transcript:ENST00000424959/transcript:ENST00000490078
BP	GO:0038178	complement component C5a signaling pathway	0.0021 (4/1936)	0.0008 (26/31285)	0.0549797	0.982486	4	C5AR1/FPR3/GPR1/CMKLR1
MF	GO:0035402	histone H3T11 kinase activity	0.0021 (4/1936)	0.0008 (26/31285)	0.0549797	0.982486	4	transcript:ENST00000567118/transcript:ENST00000569857/transcript:ENST00000626154	RP11-47I22.4
MF	GO:0035650	AP-1 adaptor complex binding	0.0021 (4/1936)	0.0008 (26/31285)	0.0549797	0.982486	4	transcript:ENST00000536606/FAM43A	transcript:ENST00000414983/transcript:ENST00000420201
BP	GO:0003340	negative regulation of mesenchymal to epithelial transition involved in metanephros morphogenesis	0.0021 (4/1936)	0.0008 (26/31285)	0.0549797	0.982486	4	SALL2/transcript:ENST00000452281/JUP/STAT1
CC	GO:0062201	actin wave	0.0031 (6/1936)	0.0016 (49/31285)	0.055031	0.982486	6	NCF4/MYO15B/MYO1G/PSTPIP1/transcript:ENST00000495564/MYO1F
MF	GO:0140327	flippase activity	0.0031 (6/1936)	0.0016 (49/31285)	0.055031	0.982486	6	ATP8B3/ABCA5/ABCA10/ATP11A	transcript:ENST00000586995/ATP8A1
CC	GO:0016471	vacuolar proton-transporting V-type ATPase complex	0.0031 (6/1936)	0.0016 (49/31285)	0.055031	0.982486	6	transcript:ENST00000635734/transcript:ENST00000561852/ATP6V0D2/transcript:ENST00000376185/transcript:ENST00000636787	transcript:ENST00000554087
BP	GO:0070318	positive regulation of G0 to G1 transition	0.0031 (6/1936)	0.0016 (49/31285)	0.055031	0.982486	6	RRM1/KCNN3/transcript:ENST00000577831	transcript:ENST00000533349/transcript:ENST00000532170/SOX7
BP	GO:0043378	positive regulation of CD8-positive, alpha-beta T cell differentiation	0.0031 (6/1936)	0.0016 (49/31285)	0.055031	0.982486	6	LILRA5/LILRB2/RUNX3/LILRA6/LILRB4/OSCAR
BP	GO:0035666	TRIF-dependent toll-like receptor signaling pathway	0.0057 (11/1936)	0.0036 (114/31285)	0.0552043	0.982486	11	LRRK1/CD300C/TLR2/TLR4/IRF9/IRF7/IRF5/transcript:ENST00000533182/IRF8	CD300LB/TICAM2
BP	GO:0034138	toll-like receptor 3 signaling pathway	0.0077 (15/1936)	0.0054 (170/31285)	0.0553873	0.982486	15	LGALS9/OAS2/LRRK1/OAS1/TLR4/TNF/IRF9/IRF7/OAS3/IRF5/transcript:ENST00000533182/MRC1/IRF8/CD86	CHODL
BP	GO:0010193	response to ozone	0.0072 (14/1936)	0.0050 (156/31285)	0.0558839	0.982486	14	IL1RN/SSH3/IL1A/ALOX5/MMP9/NGF/ALOXE3/gene:ENSG00000255663/IL1B/MRC1/DUSP1	transcript:ENST00000532881/CLIC2/transcript:ENST00000542140
BP	GO:0051666	actin cortical patch localization	0.0062 (12/1936)	0.0041 (128/31285)	0.0559024	0.982486	12	MYO15B/FMNL3/PSTPIP1/MYO1G/transcript:ENST00000618568/transcript:ENST00000616321/transcript:ENST00000551092/transcript:ENST00000495564/MYO1F	transcript:ENST00000458140/SYNGAP1/NOSTRIN
BP	GO:0032058	positive regulation of translational initiation in response to stress	0.0005 (1/1936)	0.0000 (1/31285)	0.0560652	0.982486	1	PPP1R15A
CC	GO:0044175	host cell endosome membrane	0.0005 (1/1936)	0.0000 (1/31285)	0.0560652	0.982486	1	RRM1
BP	GO:0051240	positive regulation of multicellular organismal process	0.0005 (1/1936)	0.0000 (1/31285)	0.0560652	0.982486	1	IL6
MF	GO:0051063	CDP reductase activity	0.0005 (1/1936)	0.0000 (1/31285)	0.0560652	0.982486	1	RRM1
BP	GO:0043942	negative regulation of sexual sporulation resulting in formation of a cellular spore	0.0005 (1/1936)	0.0000 (1/31285)	0.0560652	0.982486	1	PTGS2
BP	GO:0002478	antigen processing and presentation of exogenous peptide antigen	0.0005 (1/1936)	0.0000 (1/31285)	0.0560652	0.982486	1	MPEG1
MF	GO:0102028	obsolete cystathionine gamma-synthase activity (acts on O-phosphohomoserine)	0.0005 (1/1936)	0.0000 (1/31285)	0.0560652	0.982486	1	CTH
BP	GO:0007105	cytokinesis, division site positioning	0.0005 (1/1936)	0.0000 (1/31285)	0.0560652	0.982486	1		ANLN
BP	GO:1990638	response to granulocyte colony-stimulating factor	0.0005 (1/1936)	0.0000 (1/31285)	0.0560652	0.982486	1	IL12A
MF	GO:0047982	homocysteine desulfhydrase activity	0.0005 (1/1936)	0.0000 (1/31285)	0.0560652	0.982486	1	CTH
MF	GO:0050361	tryptophan 2-monooxygenase activity	0.0005 (1/1936)	0.0000 (1/31285)	0.0560652	0.982486	1	IL4I1
MF	GO:0004320	obsolete oleoyl-[acyl-carrier-protein] hydrolase activity	0.0005 (1/1936)	0.0000 (1/31285)	0.0560652	0.982486	1	OLAH
MF	GO:0043798	glycerate 2-kinase activity	0.0005 (1/1936)	0.0000 (1/31285)	0.0560652	0.982486	1	GLYCTK
BP	GO:0002274	myeloid leukocyte activation	0.0005 (1/1936)	0.0000 (1/31285)	0.0560652	0.982486	1	TYROBP
MF	GO:0003962	cystathionine gamma-synthase activity	0.0005 (1/1936)	0.0000 (1/31285)	0.0560652	0.982486	1	CTH
BP	GO:0061172	regulation of establishment of bipolar cell polarity	0.0005 (1/1936)	0.0000 (1/31285)	0.0560652	0.982486	1	ANKFN1
MF	GO:0018826	methionine gamma-lyase activity	0.0005 (1/1936)	0.0000 (1/31285)	0.0560652	0.982486	1	CTH
BP	GO:0044524	protein sulfhydration	0.0005 (1/1936)	0.0000 (1/31285)	0.0560652	0.982486	1	CTH
MF	GO:0003961	O-acetylhomoserine aminocarboxypropyltransferase activity	0.0005 (1/1936)	0.0000 (1/31285)	0.0560652	0.982486	1	CTH
BP	GO:0071268	homocysteine biosynthetic process	0.0005 (1/1936)	0.0000 (1/31285)	0.0560652	0.982486	1	CTH
BP	GO:0071269	L-homocysteine biosynthetic process	0.0005 (1/1936)	0.0000 (1/31285)	0.0560652	0.982486	1	CTH
BP	GO:0042316	penicillin metabolic process	0.0005 (1/1936)	0.0000 (1/31285)	0.0560652	0.982486	1	PTGS2
BP	GO:0031294	lymphocyte costimulation	0.0005 (1/1936)	0.0000 (1/31285)	0.0560652	0.982486	1	IL6
MF	GO:0004648	O-phospho-L-serine:2-oxoglutarate aminotransferase activity	0.0005 (1/1936)	0.0000 (1/31285)	0.0560652	0.982486	1	PSAT1
BP	GO:0019279	L-methionine biosynthetic process from L-homoserine via cystathionine	0.0005 (1/1936)	0.0000 (1/31285)	0.0560652	0.982486	1	CTH
BP	GO:0019458	methionine catabolic process via 2-oxobutanoate	0.0005 (1/1936)	0.0000 (1/31285)	0.0560652	0.982486	1	CTH
BP	GO:1990442	intrinsic apoptotic signaling pathway in response to nitrosative stress	0.0005 (1/1936)	0.0000 (1/31285)	0.0560652	0.982486	1	DDIT3
BP	GO:0070091	glucagon secretion	0.0005 (1/1936)	0.0000 (1/31285)	0.0560652	0.982486	1	IL6
BP	GO:0061888	regulation of astrocyte activation	0.0005 (1/1936)	0.0000 (1/31285)	0.0560652	0.982486	1	IL6
BP	GO:0072651	interferon-tau production	0.0005 (1/1936)	0.0000 (1/31285)	0.0560652	0.982486	1	CSF2
MF	GO:0042012	interleukin-16 receptor activity	0.0005 (1/1936)	0.0000 (1/31285)	0.0560652	0.982486	1	CD4
MF	GO:0034017	trans-2-decenoyl-acyl-carrier-protein isomerase activity	0.0005 (1/1936)	0.0000 (1/31285)	0.0560652	0.982486	1		ECI2
MF	GO:0042011	interleukin-16 binding	0.0005 (1/1936)	0.0000 (1/31285)	0.0560652	0.982486	1	CD4
BP	GO:0002737	negative regulation of plasmacytoid dendritic cell cytokine production	0.0005 (1/1936)	0.0000 (1/31285)	0.0560652	0.982486	1	BST2
MF	GO:0042163	interleukin-12 beta subunit binding	0.0005 (1/1936)	0.0000 (1/31285)	0.0560652	0.982486	1	IL12A
BP	GO:1900125	regulation of hyaluronan biosynthetic process	0.0005 (1/1936)	0.0000 (1/31285)	0.0560652	0.982486	1	SMPD3
MF	GO:0045513	interleukin-27 binding	0.0005 (1/1936)	0.0000 (1/31285)	0.0560652	0.982486	1	IL12A
MF	GO:0001847	opsonin receptor activity	0.0005 (1/1936)	0.0000 (1/31285)	0.0560652	0.982486	1	CD14
BP	GO:1904445	negative regulation of establishment of Sertoli cell barrier	0.0005 (1/1936)	0.0000 (1/31285)	0.0560652	0.982486	1	IL1A
MF	GO:0005142	interleukin-11 receptor binding	0.0005 (1/1936)	0.0000 (1/31285)	0.0560652	0.982486	1	IL11
MF	GO:0005129	granulocyte macrophage colony-stimulating factor receptor binding	0.0005 (1/1936)	0.0000 (1/31285)	0.0560652	0.982486	1	CSF2
MF	GO:0047381	obsolete dodecanoyl-[acyl-carrier-protein] hydrolase activity	0.0005 (1/1936)	0.0000 (1/31285)	0.0560652	0.982486	1	OLAH
MF	GO:0034256	chlorophyll(ide) b reductase activity	0.0005 (1/1936)	0.0000 (1/31285)	0.0560652	0.982486	1	transcript:ENST00000442122
MF	GO:0016297	fatty acyl-[ACP] hydrolase activity	0.0005 (1/1936)	0.0000 (1/31285)	0.0560652	0.982486	1	OLAH
MF	GO:0051009	O-acetylhomoserine sulfhydrylase activity	0.0005 (1/1936)	0.0000 (1/31285)	0.0560652	0.982486	1	CTH
BP	GO:0035397	helper T cell enhancement of adaptive immune response	0.0005 (1/1936)	0.0000 (1/31285)	0.0560652	0.982486	1	CD4
MF	GO:0098606	selenocystathionine gamma-lyase activity	0.0005 (1/1936)	0.0000 (1/31285)	0.0560652	0.982486	1	CTH
MF	GO:0030527	structural constituent of chromatin	0.0067 (13/1936)	0.0045 (142/31285)	0.0560869	0.982486	13	HIST2H2BF/HIST2H3A/transcript:ENST00000618193/transcript:ENST00000612061/transcript:ENST00000314088/HIST1H2BG/HIST2H2BE/transcript:ENST00000419525/HIST2H3C/transcript:ENST00000621520/PARP9/HIST1H2AG	transcript:ENST00000447802
BP	GO:0043687	post-translational protein modification	0.0165 (32/1936)	0.0136 (425/31285)	0.0563462	0.982486	32	CDKL3/RASGRP3/transcript:ENST00000534320/transcript:ENST00000558084/transcript:ENST00000495733/RPS6KA2/CCNO/AURKC/ERN1/transcript:ENST00000269361/transcript:ENST00000438133/transcript:ENST00000455999/transcript:ENST00000441728/C8orf44-SGK3/transcript:ENST00000438141/UNC13D/transcript:ENST00000556575/CDK18	transcript:ENST00000472940/transcript:ENST00000447501/transcript:ENST00000480174/SYTL5/CDK15/RP11-47I22.4/transcript:ENST00000566631/transcript:ENST00000468435/transcript:ENST00000417231/transcript:ENST00000555408/SYTL2/transcript:ENST00000448413/transcript:ENST00000453535/CDKL5
BP	GO:1900745	positive regulation of p38MAPK cascade	0.0165 (32/1936)	0.0136 (425/31285)	0.0563462	0.982486	32	GADD45B/GADD45A/LRRC2/NCF4/LRRK1/MSC/CCR5/PGF/INHBA/IL1RN/RNF126/GDF15/BMP6/transcript:ENST00000495564/INHBE/EHF/MERTK/SAMSN1/GPR1/NCF1/KCNN3/CXCR4/PSTPIP1/IL1B	transcript:ENST00000490904/PLXNA4/ELF5/transcript:ENST00000382240/AL513122.2/MAP2K3/transcript:ENST00000568004/transcript:ENST00000544041
BP	GO:0045956	positive regulation of calcium ion-dependent exocytosis	0.0108 (21/1936)	0.0082 (258/31285)	0.0563557	0.982486	21	CDKL3/SYTL1/SYT7/transcript:ENST00000618568/transcript:ENST00000551092/KCNG1/PLA2G4B/DYSF/gene:ENSG00000268400/UNC13D/CDK18	SYTL5/CDK15/transcript:ENST00000458140/transcript:ENST00000566631/KCNA7/transcript:ENST00000555408/SYTL2/transcript:ENST00000510106/JMJD7-PLA2G4B/CDKL5
MF	GO:0038181	obsolete bile acid receptor activity	0.0015 (3/1936)	0.0005 (16/31285)	0.0570006	0.982486	3	transcript:ENST00000593532/NR1I3/VDR
BP	GO:0051086	chaperone mediated protein folding independent of cofactor	0.0015 (3/1936)	0.0005 (16/31285)	0.0570006	0.982486	3	transcript:ENST00000550010	transcript:ENST00000538530/CCT2
MF	GO:0046922	peptide-O-fucosyltransferase activity	0.0015 (3/1936)	0.0005 (16/31285)	0.0570006	0.982486	3		transcript:ENST00000334538/BBS4/TMTC2
BP	GO:0006798	polyphosphate catabolic process	0.0015 (3/1936)	0.0005 (16/31285)	0.0570006	0.982486	3	SMPDL3B	transcript:ENST00000512630/SMPD1
BP	GO:0035297	regulation of Malpighian tubule diameter	0.0015 (3/1936)	0.0005 (16/31285)	0.0570006	0.982486	3	transcript:ENST00000593532/NR1I3/VDR
CC	GO:0005896	interleukin-6 receptor complex	0.0015 (3/1936)	0.0005 (16/31285)	0.0570006	0.982486	3	IL6	PRLR/LEPR
BP	GO:1904960	positive regulation of cytochrome-c oxidase activity	0.0015 (3/1936)	0.0005 (16/31285)	0.0570006	0.982486	3	RP11-73M18.2/NDUFA4L2	transcript:ENST00000489117
BP	GO:0002518	lymphocyte chemotaxis across high endothelial venule	0.0015 (3/1936)	0.0005 (16/31285)	0.0570006	0.982486	3	CXCL8/CXCR4/CCR5
BP	GO:0039548	symbiont-mediated suppression of host cytoplasmic pattern recognition receptor signaling pathway via inhibition of IRF3 activity	0.0015 (3/1936)	0.0005 (16/31285)	0.0570006	0.982486	3	PARP9/IRF8	RP11-762I7.5
CC	GO:0070110	ciliary neurotrophic factor receptor complex	0.0015 (3/1936)	0.0005 (16/31285)	0.0570006	0.982486	3	EBI3	PRLR/LEPR
BP	GO:1904189	positive regulation of transformation of host cell by virus	0.0015 (3/1936)	0.0005 (16/31285)	0.0570006	0.982486	3	transcript:ENST00000593532/NR1I3/VDR
BP	GO:0021626	central nervous system maturation	0.0015 (3/1936)	0.0005 (16/31285)	0.0570006	0.982486	3	transcript:ENST00000635734/transcript:ENST00000636787/CCR5
MF	GO:0004908	interleukin-1 receptor activity	0.0015 (3/1936)	0.0005 (16/31285)	0.0570006	0.982486	3	IL18R1/TLR2/IL1RL1
CC	GO:0034715	pICln-Sm protein complex	0.0015 (3/1936)	0.0005 (16/31285)	0.0570006	0.982486	3	transcript:ENST00000600289	LSM4/transcript:ENST00000439775
MF	GO:0015191	L-methionine transmembrane transporter activity	0.0015 (3/1936)	0.0005 (16/31285)	0.0570006	0.982486	3	SLC7A7/SLC7A11/SLC7A5
MF	GO:0005019	platelet-derived growth factor beta-receptor activity	0.0015 (3/1936)	0.0005 (16/31285)	0.0570006	0.982486	3	transcript:ENST00000520579/FLT1	transcript:ENST00000504875
BP	GO:1905300	positive regulation of intestinal epithelial cell development	0.0015 (3/1936)	0.0005 (16/31285)	0.0570006	0.982486	3	TLR4/TLR2	LRRTM4
MF	GO:0004897	ciliary neurotrophic factor receptor activity	0.0015 (3/1936)	0.0005 (16/31285)	0.0570006	0.982486	3	EBI3	PRLR/LEPR
BP	GO:0032689	negative regulation of type II interferon production	0.0170 (33/1936)	0.0141 (441/31285)	0.0570983	0.983141	33	NR1I3/VDR/LILRB2/IL1RL1/ROS1/CCL3/OSCAR/GIMAP4/INHBA/CCL8/LILRA6/IL1RN/NR4A1/IL18R1/TLR4/BMP6/transcript:ENST00000475972/DDIT3/CCL7/transcript:ENST00000539881/LILRB4/LGALS9/INHBE/LILRA5/TLR2/MERTK/transcript:ENST00000593532/IL20RB/transcript:ENST00000469964/CCL20/CD86	CSMD3/transcript:ENST00000571451
BP	GO:0008203	cholesterol metabolic process	0.0222 (43/1936)	0.0191 (598/31285)	0.0576002	0.987468	43	EBI3/transcript:ENST00000538239/VDR/DGCR2/CH25H/SMPDL3B/CES3/CEBPD/TNFAIP6/transcript:ENST00000441517/transcript:ENST00000569544/APOL1/CES1/PNLIPRP3/FAM43A/ABCA10/transcript:ENST00000375290/CYP27B1/transcript:ENST00000534405/transcript:ENST00000443875/transcript:ENST00000424354/CYP1A1/ABCA5/transcript:ENST00000593532/transcript:ENST00000585494/MTTP/APOL3	transcript:ENST00000483292/CSRP3/PTCH1/transcript:ENST00000578577/CSMD3/transcript:ENST00000482958/SMPD1/transcript:ENST00000533123/transcript:ENST00000590193/transcript:ENST00000586995/transcript:ENST00000531303/LEPR/RP11-315D16.2/DHRS9/RDH5/transcript:ENST00000578469
BP	GO:0048143	astrocyte activation	0.0077 (15/1936)	0.0055 (171/31285)	0.0577116	0.987468	15	IL1RN/IL1B/CD300C/TNF/GPR1/C1QA/transcript:ENST00000522484/C1QB/C1QC/C5AR1/FPR3/transcript:ENST00000437844/CMKLR1	CNTF/ADORA2A
BP	GO:0009901	anther dehiscence	0.0036 (7/1936)	0.0020 (62/31285)	0.0577691	0.987468	7	RNF126/transcript:ENST00000558084/ALOX5/ALOXE3/transcript:ENST00000534320/ENTPD1	FBXL2
BP	GO:0034381	plasma lipoprotein particle clearance	0.0036 (7/1936)	0.0020 (62/31285)	0.0577691	0.987468	7	transcript:ENST00000538239/CD163/transcript:ENST00000588198/CD36/C1QA/transcript:ENST00000587251	CD6
BP	GO:0060876	semicircular canal formation	0.0036 (7/1936)	0.0020 (62/31285)	0.0577691	0.987468	7	MINOS1-NBL1/INHBE/GDF15/BMP6/CLDN7/INHBA/CLDN1
CC	GO:0044615	nuclear pore nuclear basket	0.0036 (7/1936)	0.0020 (62/31285)	0.0577691	0.987468	7	transcript:ENST00000522286/NUP210/transcript:ENST00000472580	transcript:ENST00000333047/transcript:ENST00000374930/transcript:ENST00000522766/transcript:ENST00000415933
BP	GO:0042671	retinal cone cell fate determination	0.0036 (7/1936)	0.0020 (62/31285)	0.0577691	0.987468	7	INHBE/NR1I3/VDR/GDF15/BMP6/transcript:ENST00000593532/INHBA
BP	GO:0033993	response to lipid	0.0103 (20/1936)	0.0078 (244/31285)	0.0579406	0.989372	20	EBI3/VDR/FLT1/TRIB3/NCF4/PNLIPRP3/PCK2/transcript:ENST00000520579/CD36/SLCO1B3/SLCO2B1/transcript:ENST00000424354/transcript:ENST00000593532/C1QA/PSTPIP1	transcript:ENST00000461221/LEPR/COL17A1/transcript:ENST00000578469/transcript:ENST00000504875
MF	GO:0070324	thyroid hormone binding	0.0046 (9/1936)	0.0028 (88/31285)	0.0580774	0.989659	9	NR1I3/VDR/CTSZ/ALDH1A1/transcript:ENST00000593532/transcript:ENST00000567118/SLC16A10/transcript:ENST00000569857/CTSH
CC	GO:0000243	commitment complex	0.0046 (9/1936)	0.0028 (88/31285)	0.0580774	0.989659	9	transcript:ENST00000507392/ZRSR1/transcript:ENST00000401730/transcript:ENST00000600289/transcript:ENST00000475126	transcript:ENST00000424478/transcript:ENST00000439775/LSM4/transcript:ENST00000601065
CC	GO:0005703	polytene chromosome puff	0.0119 (23/1936)	0.0092 (289/31285)	0.0583879	0.992895	23	transcript:ENST00000625662/DDX3Y/transcript:ENST00000401730/transcript:ENST00000421674/ZIC2/transcript:ENST00000558084/CCNL1/transcript:ENST00000507392/RPS6KA2/transcript:ENST00000445387/transcript:ENST00000460601/transcript:ENST00000558357/transcript:ENST00000502762/EPB41L3/transcript:ENST00000556575/transcript:ENST00000488340/transcript:ENST00000514671	transcript:ENST00000472940/transcript:ENST00000470121/transcript:ENST00000630114/BCL2L2-PABPN1/KMT2C/transcript:ENST00000601065
MF	GO:0004386	helicase activity	0.0119 (23/1936)	0.0092 (289/31285)	0.0583879	0.992895	23	TDRD6/transcript:ENST00000534320/transcript:ENST00000625662/transcript:ENST00000482936/DDX60/transcript:ENST00000558084/transcript:ENST00000443963/transcript:ENST00000495733/transcript:ENST00000474964/IFIH1/DHX58/transcript:ENST00000558357/HELZ2/transcript:ENST00000574023/transcript:ENST00000463267	transcript:ENST00000367667/transcript:ENST00000585057/transcript:ENST00000533164/transcript:ENST00000468435/RTEL1/transcript:ENST00000484566/transcript:ENST00000470531/transcript:ENST00000509576
BP	GO:2001186	negative regulation of CD8-positive, alpha-beta T cell activation	0.0041 (8/1936)	0.0024 (75/31285)	0.0585289	0.993243	8	LILRA5/LILRB2/LILRB4/HLA-F/ULBP1/HLA-C/LILRA6/OSCAR
BP	GO:0032042	mitochondrial DNA metabolic process	0.0041 (8/1936)	0.0024 (75/31285)	0.0585289	0.993243	8	transcript:ENST00000601091/transcript:ENST00000457179/transcript:ENST00000594759/SESN2	transcript:ENST00000584582/transcript:ENST00000590558/transcript:ENST00000582981/CSMD3
BP	GO:0060221	retinal rod cell differentiation	0.0062 (12/1936)	0.0041 (129/31285)	0.058639	0.993715	12	transcript:ENST00000452281/CDKL3/GNAL/STAT1/CDK18/GNA15	transcript:ENST00000555408/CDK15/CDKL5/CNTF/NDP/SOX7
BP	GO:0006520	amino acid metabolic process	0.0067 (13/1936)	0.0046 (143/31285)	0.0586773	0.993715	13	GAD1/SDS/SLC16A10/ASNS/ABHD14A-ACY1/DIO2/transcript:ENST00000433912/transcript:ENST00000454046/transcript:ENST00000636880	GLS/transcript:ENST00000528679/transcript:ENST00000417154/transcript:ENST00000493875
BP	GO:0042149	cellular response to glucose starvation	0.0186 (36/1936)	0.0156 (489/31285)	0.0589377	0.997099	36	transcript:ENST00000538239/RASGRP3/TRIB3/MNDA/SLC7A5/SESN2/gene:ENSG00000280571/SLC7A11/transcript:ENST00000445387/transcript:ENST00000454046/ANKRD45/transcript:ENST00000409403/PCK2/PLIN4/BRSK2/transcript:ENST00000426966/transcript:ENST00000626154/RBM39/OLIG2/SLC7A7/MTMR1/MTMR10/transcript:ENST00000502762/transcript:ENST00000433464/ASNS/SLC3A2/transcript:ENST00000514671	transcript:ENST00000630114/transcript:ENST00000533907/RP11-47I22.4/transcript:ENST00000566631/BCL2L2-PABPN1/transcript:ENST00000338163/transcript:ENST00000573196/transcript:ENST00000466227/transcript:ENST00000413809
MF	GO:0003906	DNA-(apurinic or apyrimidinic site) endonuclease activity	0.0026 (5/1936)	0.0012 (38/31285)	0.0595573	1	5	transcript:ENST00000547173	transcript:ENST00000530170/transcript:ENST00000522610/transcript:ENST00000547475/transcript:ENST00000530721
BP	GO:0070173	regulation of enamel mineralization	0.0026 (5/1936)	0.0012 (38/31285)	0.0595573	1	5	MMP9/MMP12/IFIH1/DHX58/MMP3
BP	GO:0010749	regulation of nitric oxide mediated signal transduction	0.0026 (5/1936)	0.0012 (38/31285)	0.0595573	1	5	CBS/PGF/CBSL	PDE11A/PDE3A
BP	GO:0090301	negative regulation of neural crest formation	0.0026 (5/1936)	0.0012 (38/31285)	0.0595573	1	5	transcript:ENST00000525130/transcript:ENST00000525370/transcript:ENST00000377092	transcript:ENST00000508798/transcript:ENST00000530726
MF	GO:0070905	serine binding	0.0026 (5/1936)	0.0012 (38/31285)	0.0595573	1	5	transcript:ENST00000557348/transcript:ENST00000553837/transcript:ENST00000557433/transcript:ENST00000555563	transcript:ENST00000556825
BP	GO:0098958	retrograde axonal transport of mitochondrion	0.0026 (5/1936)	0.0012 (38/31285)	0.0595573	1	5	transcript:ENST00000545307/transcript:ENST00000487078/transcript:ENST00000554402/DNAH12	AGBL5
BP	GO:0009063	amino acid catabolic process	0.0026 (5/1936)	0.0012 (38/31285)	0.0595573	1	5	transcript:ENST00000567530/transcript:ENST00000454046/ASNS/IL4I1	transcript:ENST00000584453
BP	GO:0045347	negative regulation of MHC class II biosynthetic process	0.0031 (6/1936)	0.0016 (50/31285)	0.0597009	1	6	EHF/CXCL5/CXCL8/CXCL3/CXCL2	ELF5
MF	GO:0005124	scavenger receptor binding	0.0031 (6/1936)	0.0016 (50/31285)	0.0597009	1	6	GPR1/C5AR1/GRASP/FPR3/CYTIP/CMKLR1
BP	GO:0046902	regulation of mitochondrial membrane permeability	0.0052 (10/1936)	0.0033 (102/31285)	0.0600376	1	10	transcript:ENST00000452281/transcript:ENST00000491736/transcript:ENST00000429888/GIMAP4/transcript:ENST00000472580/N4BP2/STAT1/transcript:ENST00000569820	BCL2L2-PABPN1/transcript:ENST00000415933
BP	GO:0035011	melanotic encapsulation of foreign target	0.0124 (24/1936)	0.0097 (305/31285)	0.060053	1	24	CDKL3/SCARF1/transcript:ENST00000591662/gene:ENSG00000259753/FMNL3/transcript:ENST00000554738/SIGLEC1/transcript:ENST00000434055/transcript:ENST00000580805/DNAH12/NTNG2/transcript:ENST00000504476/C8orf44-SGK3/transcript:ENST00000512070/CDK18/SDK2	DCTN1/CDK15/transcript:ENST00000415891/RP11-47I22.4/transcript:ENST00000555408/NRXN3/NCAM2/CDKL5
BP	GO:0090023	positive regulation of neutrophil chemotaxis	0.0119 (23/1936)	0.0093 (290/31285)	0.0602041	1	23	MX2/C5AR1/CXCL3/CCL3/CCR5/CAMK1D/transcript:ENST00000534180/CCL8/FPR3/IL1RN/DYSF/CXCL5/CXCL2/CCL7/CMKLR1/transcript:ENST00000610164/GPR1/CXCR4/CXCL8/MX1/IL1B/CCL20	DCLK1
MF	GO:0046975	histone H3K36 methyltransferase activity	0.0088 (17/1936)	0.0064 (201/31285)	0.0602236	1	17	ZNF366/ZNF775/SALL2/transcript:ENST00000413704/transcript:ENST00000431285/transcript:ENST00000445387/RP13-582O9.6/transcript:ENST00000448461/transcript:ENST00000312087	JMJD7-PLA2G4B/transcript:ENST00000425046/transcript:ENST00000353275/transcript:ENST00000431180/transcript:ENST00000334884/transcript:ENST00000413809/KMT2C/transcript:ENST00000446066
BP	GO:0038094	Fc-gamma receptor signaling pathway	0.0067 (13/1936)	0.0046 (144/31285)	0.0613469	1	13	FCER1G/SLA/LILRA5/transcript:ENST00000483665/LILRB2/LILRB4/BTK/HCK/FCGR1A/LILRA6/OSCAR	FCGR2A/ITK
MF	GO:0016597	amino acid binding	0.0067 (13/1936)	0.0046 (144/31285)	0.0613469	1	13	transcript:ENST00000564578/GAD1/transcript:ENST00000557348/transcript:ENST00000553837/SDS/SLC1A4/transcript:ENST00000557433/SLC6A9/transcript:ENST00000555563/transcript:ENST00000454046/ASNS	transcript:ENST00000556825/transcript:ENST00000493875
CC	GO:0031011	Ino80 complex	0.0067 (13/1936)	0.0046 (144/31285)	0.0613469	1	13	ZIC2/transcript:ENST00000558357/transcript:ENST00000546701/transcript:ENST00000545307/transcript:ENST00000554402/ACTG2/transcript:ENST00000420715/transcript:ENST00000455562	transcript:ENST00000572105/transcript:ENST00000585057/KMT2C/transcript:ENST00000441123/transcript:ENST00000425660
BP	GO:0001833	inner cell mass cell proliferation	0.0062 (12/1936)	0.0042 (130/31285)	0.0614635	1	12	CD163/SALL2/transcript:ENST00000495733/transcript:ENST00000588198/transcript:ENST00000482914/TNFAIP6/transcript:ENST00000443875/transcript:ENST00000587251	transcript:ENST00000413809/CD6/CSMD3/transcript:ENST00000432615
MF	GO:0045236	CXCR chemokine receptor binding	0.0062 (12/1936)	0.0042 (130/31285)	0.0614635	1	12	FCER1G/transcript:ENST00000518360/CXCL5/transcript:ENST00000464497/CXCL8/CXCL3/CXCL2/CCL8/HERC6/CCL3	C14orf105/SLC38A6
BP	GO:0035771	interleukin-4-mediated signaling pathway	0.0021 (4/1936)	0.0009 (27/31285)	0.0617886	1	4	IL2RG/CSF2RB/transcript:ENST00000452281/STAT1
BP	GO:0006568	tryptophan metabolic process	0.0021 (4/1936)	0.0009 (27/31285)	0.0617886	1	4	GAD1/transcript:ENST00000481262	transcript:ENST00000493875/ACADVL
BP	GO:0080029	cellular response to boron-containing substance levels	0.0021 (4/1936)	0.0009 (27/31285)	0.0617886	1	4	MX2/MX1	SLC4A3/SLC4A4
BP	GO:0035168	larval lymph gland hemocyte differentiation	0.0021 (4/1936)	0.0009 (27/31285)	0.0617886	1	4	GDF15/INHBE/RUNX3/BMP6
CC	GO:0001401	SAM complex	0.0021 (4/1936)	0.0009 (27/31285)	0.0617886	1	4		transcript:ENST00000409258/transcript:ENST00000504902/transcript:ENST00000424959/transcript:ENST00000490078
BP	GO:0033024	mast cell apoptotic process	0.0021 (4/1936)	0.0009 (27/31285)	0.0617886	1	4	FCER1G/transcript:ENST00000452281/STAT1	SYNGAP1
BP	GO:0070305	response to cGMP	0.0021 (4/1936)	0.0009 (27/31285)	0.0617886	1	4	TLR4/TLR2/RP11-295K3.1/ECM2
BP	GO:0032945	negative regulation of mononuclear cell proliferation	0.0036 (7/1936)	0.0020 (63/31285)	0.0619915	1	7	LGALS9/LILRA5/PTX3/LILRB2/LILRB4/LILRA6/OSCAR
BP	GO:0110088	hippocampal neuron apoptotic process	0.0036 (7/1936)	0.0020 (63/31285)	0.0619915	1	7	FLI1/EHF/CAMK1D/TRIB3/ERN1	DCLK1/ELF5
BP	GO:0008299	isoprenoid biosynthetic process	0.0036 (7/1936)	0.0020 (63/31285)	0.0619915	1	7	ALOX5/transcript:ENST00000525283/ALDH1A1/transcript:ENST00000447878/ALOXE3	transcript:ENST00000503915/transcript:ENST00000525607
MF	GO:0015173	aromatic amino acid transmembrane transporter activity	0.0036 (7/1936)	0.0020 (63/31285)	0.0619915	1	7	SLC7A11/SLC16A10/SLC6A9/SLC7A5/SLC7A7/SLC3A2	SLC38A6
BP	GO:0044477	envenomation resulting in negative regulation of platelet aggregation in another organism	0.0036 (7/1936)	0.0020 (63/31285)	0.0619915	1	7	ADAMTS14/ADAMTS5/transcript:ENST00000529473/MRC1/IL4I1	transcript:ENST00000468065/transcript:ENST00000526491
CC	GO:0098684	photoreceptor ribbon synapse	0.0108 (21/1936)	0.0083 (261/31285)	0.0621222	1	21	MX2/ATP11A/NCF4/SYTL1/ADAP2/transcript:ENST00000554738/NTNG2/ATP8B3/PSTPIP1/ADGRA2/MX1	LRRTM4/SYTL5/CDHR3/NOSTRIN/LRRC17/transcript:ENST00000617103/gene:ENSG00000283228/NRXN3/SYTL2/ATP8A1
BP	GO:0032298	positive regulation of DNA-templated DNA replication initiation	0.0041 (8/1936)	0.0024 (76/31285)	0.0623523	1	8	CDKL3/CDK18/ERN1	transcript:ENST00000453535/transcript:ENST00000555408/CDKL5/transcript:ENST00000566631/CDK15
BP	GO:0043308	eosinophil degranulation	0.0041 (8/1936)	0.0024 (76/31285)	0.0623523	1	8	transcript:ENST00000483665/CXCL8/SIGLEC1/CCL8/FCGR1A/CCL7/CCL3	FCGR2A
MF	GO:0019864	IgG binding	0.0041 (8/1936)	0.0024 (76/31285)	0.0623523	1	8	FCER1G/transcript:ENST00000483665/LILRB2/HLA-F/FCGR1A/ULBP1/HLA-C	FCGR2A
MF	GO:0003684	damaged DNA binding	0.0186 (36/1936)	0.0157 (492/31285)	0.0631644	1	36	transcript:ENST00000513914/transcript:ENST00000482936/transcript:ENST00000448461/DDX60/transcript:ENST00000378601/HIST1H2AG/transcript:ENST00000593946/transcript:ENST00000465003/transcript:ENST00000462523/BIVM-ERCC5/transcript:ENST00000495733/transcript:ENST00000314088/transcript:ENST00000482007/REC8/ZNF775/transcript:ENST00000483148/ZNF641/transcript:ENST00000312087	transcript:ENST00000353275/ERCC5/ZNF142/transcript:ENST00000530170/transcript:ENST00000530721/transcript:ENST00000510815/transcript:ENST00000461221/transcript:ENST00000485479/transcript:ENST00000599177/RTEL1/transcript:ENST00000509126/DDB2/transcript:ENST00000413697/transcript:ENST00000522610/RP11-15K19.2/transcript:ENST00000476581/transcript:ENST00000325577/transcript:ENST00000493662
BP	GO:0008038	neuron recognition	0.0072 (14/1936)	0.0051 (159/31285)	0.0634594	1	14	BCAM/transcript:ENST00000460679/OLIG2/MSC/PCDH17/CXCR4/transcript:ENST00000554738/FPR3/NGF/transcript:ENST00000591662	CDHR3/transcript:ENST00000484979/NRXN3/NCAM2
MF	GO:0016279	protein-lysine N-methyltransferase activity	0.0083 (16/1936)	0.0060 (188/31285)	0.0638491	1	16	transcript:ENST00000534187/transcript:ENST00000524893/transcript:ENST00000558084/transcript:ENST00000620154/transcript:ENST00000528685/transcript:ENST00000445387/transcript:ENST00000443120/FAM86B1	transcript:ENST00000447802/transcript:ENST00000590193/transcript:ENST00000431180/transcript:ENST00000334884/transcript:ENST00000413809/KMT2C/transcript:ENST00000530385/transcript:ENST00000340537
BP	GO:0003149	membranous septum morphogenesis	0.0067 (13/1936)	0.0046 (145/31285)	0.0640964	1	13	INHBE/FLT1/GDF15/BMP6/transcript:ENST00000522484/transcript:ENST00000445387/INHBA/ROS1/transcript:ENST00000312087	transcript:ENST00000353275/transcript:ENST00000431180/KMT2C/transcript:ENST00000504875
BP	GO:0021819	layer formation in cerebral cortex	0.0108 (21/1936)	0.0084 (262/31285)	0.0641324	1	21	CDKL3/transcript:ENST00000538239/RP11-385D13.1/MBOAT7/ZIC2/JUP/C1QC/CDK18	transcript:ENST00000503494/RP1/CDK15/SYNGAP1/SPAG16/transcript:ENST00000566631/transcript:ENST00000426902/transcript:ENST00000555408/COL17A1/DCLK1/transcript:ENST00000510106/transcript:ENST00000539560/CDKL5
CC	GO:0035770	ribonucleoprotein granule	0.0057 (11/1936)	0.0037 (117/31285)	0.0641736	1	11	TDRD6/transcript:ENST00000502762/transcript:ENST00000395745/RBM39/ESRP1/ESRP2/transcript:ENST00000514671	transcript:ENST00000441384/transcript:ENST00000338163/transcript:ENST00000388749/transcript:ENST00000630114
BP	GO:0018894	dibenzo-p-dioxin metabolic process	0.0057 (11/1936)	0.0037 (117/31285)	0.0641736	1	11	C8orf44-SGK3/RASGRP3/SRD5A2/CYP1A1/RPS6KA2/CCL8/CCL7/CYP27B1/CCL3	RP11-47I22.4/SYTL5
MF	GO:0043236	laminin binding	0.0170 (33/1936)	0.0143 (446/31285)	0.0644929	1	33	transcript:ENST00000538239/CD163/CTSZ/CES3/transcript:ENST00000588198/TNFAIP6/UNC5B/CES1/ECM2/gene:ENSG00000259753/transcript:ENST00000554738/transcript:ENST00000587251/FLRT1/ADAMTS5/transcript:ENST00000443875/gene:ENSG00000255663/NTNG2/transcript:ENST00000529473/CTSH/LGALS9/BCAM/ADGRA2	LRRTM4/transcript:ENST00000482958/LRRC4/transcript:ENST00000526491/transcript:ENST00000542140/LRRC17/NRXN3/transcript:ENST00000468065/CD6/ITGA10/transcript:ENST00000568004
BP	GO:0060837	blood vessel endothelial cell differentiation	0.0031 (6/1936)	0.0016 (51/31285)	0.0645994	1	6	transcript:ENST00000460679/FLT1/HES1/HEY1/transcript:ENST00000488727	transcript:ENST00000504875
BP	GO:0032223	negative regulation of synaptic transmission, cholinergic	0.0031 (6/1936)	0.0016 (51/31285)	0.0645994	1	6	CES1/CES3/GNAL/GNA15	transcript:ENST00000482958/GPR156
BP	GO:0001820	serotonin secretion	0.0031 (6/1936)	0.0016 (51/31285)	0.0645994	1	6	CD300C/transcript:ENST00000483665/LILRB2/FCGR1A	CD300LB/FCGR2A
BP	GO:2001140	positive regulation of phospholipid transport	0.0031 (6/1936)	0.0016 (51/31285)	0.0645994	1	6	transcript:ENST00000496241/ABCA5/ABCA10/transcript:ENST00000504594	transcript:ENST00000586995/ECI2
BP	GO:0042062	long-term strengthening of neuromuscular junction	0.0031 (6/1936)	0.0016 (51/31285)	0.0645994	1	6	SPTBN5/PSTPIP1/transcript:ENST00000512070/transcript:ENST00000495564	transcript:ENST00000420627/gene:ENSG00000273167
MF	GO:0140345	phosphatidylcholine flippase activity	0.0031 (6/1936)	0.0016 (51/31285)	0.0645994	1	6	ATP8B3/ABCA5/ABCA10/ATP11A	transcript:ENST00000586995/ATP8A1
BP	GO:0034241	positive regulation of macrophage fusion	0.0031 (6/1936)	0.0016 (51/31285)	0.0645994	1	6	TYROBP/CD300C/ADAMTS5/transcript:ENST00000529473	transcript:ENST00000468065/transcript:ENST00000526491
BP	GO:0046655	folic acid metabolic process	0.0046 (9/1936)	0.0029 (90/31285)	0.0651517	1	9	transcript:ENST00000511461/transcript:ENST00000557348/transcript:ENST00000553837/ALDH1A1/transcript:ENST00000557433/transcript:ENST00000513439/transcript:ENST00000555563	transcript:ENST00000556825/FOLR3
MF	GO:0008035	high-density lipoprotein particle binding	0.0046 (9/1936)	0.0029 (90/31285)	0.0651517	1	9	transcript:ENST00000538239/CD300C/ABCA5/ABCA10/CD36/APOL3/APOL1	transcript:ENST00000483292/transcript:ENST00000586995
BP	GO:1905691	lipid droplet disassembly	0.0046 (9/1936)	0.0029 (90/31285)	0.0651517	1	9	SMPDL3B/CTSZ/BRSK2/PLIN4/transcript:ENST00000626154/transcript:ENST00000534405/CTSH	SMPD1/transcript:ENST00000533123
BP	GO:0019370	leukotriene biosynthetic process	0.0046 (9/1936)	0.0029 (90/31285)	0.0651517	1	9	transcript:ENST00000483665/ALOX5/ANPEP/ALOXE3/PLA2G4B/FCGR1A	JMJD7-PLA2G4B/FCGR2A/transcript:ENST00000515800
BP	GO:0150078	positive regulation of neuroinflammatory response	0.0046 (9/1936)	0.0029 (90/31285)	0.0651517	1	9	IL1RN/MMP9/CD300C/IL6/MMP12/TNF/NUPR1/IL1B/MMP3
BP	GO:1902564	negative regulation of neutrophil activation	0.0026 (5/1936)	0.0012 (39/31285)	0.0653011	1	5	CD300C/transcript:ENST00000483665/FCGR1A	CD300LB/FCGR2A
BP	GO:0045590	negative regulation of regulatory T cell differentiation	0.0026 (5/1936)	0.0012 (39/31285)	0.0653011	1	5	IRF9/IRF7/IRF5/transcript:ENST00000533182/IRF8
CC	GO:0005701	polytene chromosome chromocenter	0.0026 (5/1936)	0.0012 (39/31285)	0.0653011	1	5	transcript:ENST00000558084/transcript:ENST00000445387	gene:ENSG00000141979/transcript:ENST00000413809/KMT2C
MF	GO:0071723	lipopeptide binding	0.0026 (5/1936)	0.0012 (39/31285)	0.0653011	1	5	TLR2/TLR4/IL1RL1/HLA-F/HLA-C
BP	GO:0090108	positive regulation of high-density lipoprotein particle assembly	0.0026 (5/1936)	0.0012 (39/31285)	0.0653011	1	5	NR1I3/ABCA5/transcript:ENST00000593532/ABCA10	transcript:ENST00000586995
BP	GO:0060963	positive regulation of ribosomal protein gene transcription by RNA polymerase II	0.0026 (5/1936)	0.0012 (39/31285)	0.0653011	1	5	C8orf44-SGK3/RPS6KA2/transcript:ENST00000556575	transcript:ENST00000382240/transcript:ENST00000472940
MF	GO:0120019	phosphatidylcholine transfer activity	0.0026 (5/1936)	0.0012 (39/31285)	0.0653011	1	5	ABCA5/ABCA10/MTTP	transcript:ENST00000586995/transcript:ENST00000478631
BP	GO:0043928	obsolete exonucleolytic catabolism of deadenylated mRNA	0.0026 (5/1936)	0.0012 (39/31285)	0.0653011	1	5	NT5C3A/transcript:ENST00000522644/HELZ2/EXOSC6	transcript:ENST00000465229
BP	GO:0071911	synchronous neurotransmitter secretion	0.0026 (5/1936)	0.0012 (39/31285)	0.0653011	1	5	SYTL1/SYT7/UNC13D	SYTL2/SYTL5
BP	GO:0098746	fast, calcium ion-dependent exocytosis of neurotransmitter	0.0026 (5/1936)	0.0012 (39/31285)	0.0653011	1	5	SYTL1/SYT7/UNC13D	SYTL2/SYTL5
BP	GO:0002237	response to molecule of bacterial origin	0.0119 (23/1936)	0.0094 (293/31285)	0.0658899	1	23	TRPA1/CD14/ATP11A/CXCL3/transcript:ENST00000594759/ECM2/LRRK1/transcript:ENST00000601091/IRAK3/ERN1/TLR4/CXCL5/CXCL2/ATP8B3/TLR2/CXCL8/transcript:ENST00000443120	transcript:ENST00000561139/transcript:ENST00000447802/ANKRD23/MAP2K3/ATP8A1/transcript:ENST00000568004
BP	GO:1902533	positive regulation of intracellular signal transduction	0.0119 (23/1936)	0.0094 (293/31285)	0.0658899	1	23	RASGRP3/FLT1/SCARF1/CES3/ROS1/CES1/LRRK1/BTK/transcript:ENST00000518360/KCP/TLR4/HCK/transcript:ENST00000520595/SLA/TLR2/MERTK/transcript:ENST00000483534	ITK/transcript:ENST00000482958/SLC9A7/CHODL/ITGA10/transcript:ENST00000504875
CC	GO:0008023	transcription elongation factor complex	0.0072 (14/1936)	0.0051 (160/31285)	0.0661301	1	14	transcript:ENST00000558084/CDKL3/CCNL1/OCLN/transcript:ENST00000413704/transcript:ENST00000445387/transcript:ENST00000460601/transcript:ENST00000488340/transcript:ENST00000495305	transcript:ENST00000539560/transcript:ENST00000465045/KMT2C/transcript:ENST00000470121/transcript:ENST00000482621
BP	GO:0001957	intramembranous ossification	0.0072 (14/1936)	0.0051 (160/31285)	0.0661301	1	14	ECM2/MMP9/ADAP2/CTSZ/MMP12/C1QA/COL9A2/ADAP1/MMP3/MRC1/CTSH	RGS17/COL17A1/RGS4
BP	GO:0032211	negative regulation of telomere maintenance via telomerase	0.0072 (14/1936)	0.0051 (160/31285)	0.0661301	1	14	SLA/transcript:ENST00000609106/transcript:ENST00000607932/BTK/transcript:ENST00000502762/HCK/RBM39/transcript:ENST00000357464/ROS1/transcript:ENST00000514671	transcript:ENST00000475997/transcript:ENST00000338163/ITK/transcript:ENST00000630114
BP	GO:0034122	negative regulation of toll-like receptor signaling pathway	0.0108 (21/1936)	0.0084 (263/31285)	0.0661871	1	21	SMPDL3B/IRF7/ECM2/IRF5/IRAK3/IRF8/transcript:ENST00000576235/FLRT1/TLR4/transcript:ENST00000534405/transcript:ENST00000533182/transcript:ENST00000539881/TLR2/IRF9/MERTK	LRRTM4/transcript:ENST00000461221/SMPD1/transcript:ENST00000571451/LRRC4/transcript:ENST00000533123
BP	GO:0090310	negative regulation of DNA methylation-dependent heterochromatin formation	0.0041 (8/1936)	0.0025 (77/31285)	0.066328	1	8	transcript:ENST00000409403/transcript:ENST00000558084/transcript:ENST00000413704/transcript:ENST00000445387	transcript:ENST00000335760/transcript:ENST00000465045/transcript:ENST00000334884/KMT2C
BP	GO:0060255	regulation of macromolecule metabolic process	0.0041 (8/1936)	0.0025 (77/31285)	0.066328	1	8	FLT1/MERTK/ROS1/CDK18	transcript:ENST00000555408/transcript:ENST00000566631/CDK15/transcript:ENST00000504875
BP	GO:0043305	negative regulation of mast cell degranulation	0.0041 (8/1936)	0.0025 (77/31285)	0.066328	1	8	LGALS9/IL2RG/CD300C/SLAMF7/FOXD4L1/transcript:ENST00000607882	CD300LB/PRLR
BP	GO:0044539	long-chain fatty acid import into cell	0.0041 (8/1936)	0.0025 (77/31285)	0.066328	1	8	C8orf44-SGK3/CD36/SPX/RPS6KA2/transcript:ENST00000556575	transcript:ENST00000382240/transcript:ENST00000472940/RP11-47I22.4
MF	GO:0050692	DNA binding domain binding	0.0041 (8/1936)	0.0025 (77/31285)	0.066328	1	8	NR4A1/VDR/transcript:ENST00000593532/ESR1/transcript:ENST00000538526	transcript:ENST00000586337/transcript:ENST00000323735/transcript:ENST00000306450
BP	GO:0002686	negative regulation of leukocyte migration	0.0036 (7/1936)	0.0020 (64/31285)	0.0663973	1	7	HOXD9/HOXA5/transcript:ENST00000607882	HOXB6/SYNGAP1/ADORA2A/transcript:ENST00000536532
BP	GO:0000103	sulfate assimilation	0.0036 (7/1936)	0.0020 (64/31285)	0.0663973	1	7	TFEC/TMX2/transcript:ENST00000361660/CTH/transcript:ENST00000569544	SLC26A7/SLC26A4
BP	GO:0045622	regulation of T-helper cell differentiation	0.0036 (7/1936)	0.0020 (64/31285)	0.0663973	1	7	ZIC2/IRF9/IRF7/IRF5/transcript:ENST00000533182/IRF8/transcript:ENST00000507218
BP	GO:0072679	thymocyte migration	0.0036 (7/1936)	0.0020 (64/31285)	0.0663973	1	7	CCR5/CXCR4/CCL20/transcript:ENST00000616321/CCL8/CCL7/CCL3
BP	GO:0051791	medium-chain fatty acid metabolic process	0.0036 (7/1936)	0.0020 (64/31285)	0.0663973	1	7	CES1/transcript:ENST00000583858/transcript:ENST00000526129/CES3/transcript:ENST00000481262	transcript:ENST00000482958/ACADVL
BP	GO:1904071	presynaptic active zone assembly	0.0036 (7/1936)	0.0020 (64/31285)	0.0663973	1	7	SYTL1/SYT7/PCDH17/DYSF	transcript:ENST00000484979/SYTL2/SYTL5
MF	GO:0015180	L-alanine transmembrane transporter activity	0.0036 (7/1936)	0.0020 (64/31285)	0.0663973	1	7	SLC7A11/SLC1A4/SLC7A7/SLC7A5/SLC3A2	SLC38A6/SLC38A4
BP	GO:1905881	positive regulation of oogenesis	0.0015 (3/1936)	0.0005 (17/31285)	0.0664251	1	3	transcript:ENST00000401730/transcript:ENST00000545236	transcript:ENST00000601065
MF	GO:0043958	acryloyl-CoA reductase (NADH) activity	0.0015 (3/1936)	0.0005 (17/31285)	0.0664251	1	3	transcript:ENST00000481262/transcript:ENST00000583858	ACADVL
MF	GO:0140892	sodium,bicarbonate:chloride antiporter activity	0.0015 (3/1936)	0.0005 (17/31285)	0.0664251	1	3	transcript:ENST00000425141	SLC4A4/SLC4A3
BP	GO:0071039	nuclear polyadenylation-dependent CUT catabolic process	0.0015 (3/1936)	0.0005 (17/31285)	0.0664251	1	3	transcript:ENST00000357464/HELZ2/EXOSC6
BP	GO:0045837	negative regulation of membrane potential	0.0015 (3/1936)	0.0005 (17/31285)	0.0664251	1	3	IL1RN/IL1B/IL6
BP	GO:0033032	regulation of myeloid cell apoptotic process	0.0015 (3/1936)	0.0005 (17/31285)	0.0664251	1	3	transcript:ENST00000593532/NR1I3/VDR
BP	GO:0045852	pH elevation	0.0015 (3/1936)	0.0005 (17/31285)	0.0664251	1	3	transcript:ENST00000425141	SLC4A4/SLC4A3
CC	GO:0031379	RNA-directed RNA polymerase complex	0.0015 (3/1936)	0.0005 (17/31285)	0.0664251	1	3	transcript:ENST00000357464/transcript:ENST00000496634/HELZ2
BP	GO:0009168	purine ribonucleoside monophosphate biosynthetic process	0.0015 (3/1936)	0.0005 (17/31285)	0.0664251	1	3	transcript:ENST00000580356	transcript:ENST00000424203/transcript:ENST00000536532
BP	GO:0018158	protein oxidation	0.0015 (3/1936)	0.0005 (17/31285)	0.0664251	1	3	transcript:ENST00000438133	transcript:ENST00000448413/transcript:ENST00000447501
MF	GO:0035663	Toll-like receptor 2 binding	0.0015 (3/1936)	0.0005 (17/31285)	0.0664251	1	3	TLR4/TLR2/IL1RL1
MF	GO:0008510	sodium:bicarbonate symporter activity	0.0015 (3/1936)	0.0005 (17/31285)	0.0664251	1	3	transcript:ENST00000425141	SLC4A4/SLC4A3
BP	GO:0010731	protein glutathionylation	0.0015 (3/1936)	0.0005 (17/31285)	0.0664251	1	3	transcript:ENST00000474308	CLIC2/transcript:ENST00000527688
BP	GO:0072262	metanephric glomerular mesangial cell proliferation involved in metanephros development	0.0015 (3/1936)	0.0005 (17/31285)	0.0664251	1	3	transcript:ENST00000520579/FLT1	transcript:ENST00000504875
BP	GO:0060745	mammary gland branching involved in pregnancy	0.0052 (10/1936)	0.0033 (104/31285)	0.066702	1	10	NR4A1/NR1I3/C2/VDR/transcript:ENST00000593532/TNFAIP6/transcript:ENST00000577831/ESR1/transcript:ENST00000443875	CSMD3
BP	GO:0048469	cell maturation	0.0145 (28/1936)	0.0118 (370/31285)	0.0669837	1	28	VDR/FLT1/LMO1/HES1/ROS1/HEY1/RP11-295K3.1/transcript:ENST00000558656/CCL3/MSC/RUNX3/BTK/PGF/CCL8/JUP/HCK/CCL7/OLIG2/SLA/MERTK/transcript:ENST00000593532/transcript:ENST00000435201/CCL20	GIPR/RFX8/ITK/SOX7/transcript:ENST00000504875
CC	GO:0098850	extrinsic component of synaptic vesicle membrane	0.0057 (11/1936)	0.0038 (118/31285)	0.067362	1	11	SYTL1/SYT7/DYSF/UNC13D/transcript:ENST00000376185	transcript:ENST00000617103/TTC12/transcript:ENST00000554087/SYTL2/TPRG1/SYTL5
CC	GO:0016342	catenin complex	0.0057 (11/1936)	0.0038 (118/31285)	0.067362	1	11	JUP/CTNND2/transcript:ENST00000554738/transcript:ENST00000521724/transcript:ENST00000421462/transcript:ENST00000426248	CDHR3/transcript:ENST00000539548/NRXN3/gene:ENSG00000258864/CDH18
BP	GO:2000765	regulation of cytoplasmic translation	0.0057 (11/1936)	0.0038 (118/31285)	0.067362	1	11	transcript:ENST00000478046/SENP3/ANPEP/RP11-385D13.1/transcript:ENST00000504325/transcript:ENST00000511473/WDFY4	ZNF385D/SPAG16/gene:ENSG00000277957/transcript:ENST00000503494
BP	GO:1902617	response to fluoride	0.0057 (11/1936)	0.0038 (118/31285)	0.067362	1	11	FLRT1/ECM2/transcript:ENST00000357390/DCN/C1QA/COL9A2	transcript:ENST00000483292/COL17A1/transcript:ENST00000485036/LRRTM4/LRRC17
MF	GO:0008327	methyl-CpG binding	0.0072 (14/1936)	0.0051 (161/31285)	0.0688744	1	14	transcript:ENST00000558084/SALL2/transcript:ENST00000534320/transcript:ENST00000435201/LMO1/transcript:ENST00000312087/transcript:ENST00000558656/transcript:ENST00000507218	transcript:ENST00000592705/transcript:ENST00000353275/transcript:ENST00000413809/transcript:ENST00000468435/transcript:ENST00000578272/transcript:ENST00000503703
BP	GO:0090383	phagosome acidification	0.0046 (9/1936)	0.0029 (91/31285)	0.0688839	1	9	transcript:ENST00000536606/MX2/SLAMF7/CD36/transcript:ENST00000425141/MX1	transcript:ENST00000436958/SLC4A3/SLC4A4
BP	GO:0001746	Bolwig's organ morphogenesis	0.0046 (9/1936)	0.0029 (91/31285)	0.0688839	1	9	transcript:ENST00000460679/BCAM/MSC/transcript:ENST00000522484/transcript:ENST00000375290/OLIG2	EYA1/PTCH1/NCAM2
BP	GO:0071028	nuclear mRNA surveillance	0.0046 (9/1936)	0.0029 (91/31285)	0.0688839	1	9	transcript:ENST00000480240/HELZ2/EXOSC6/transcript:ENST00000401730/transcript:ENST00000545236/DDX60	transcript:ENST00000465229/transcript:ENST00000484566/transcript:ENST00000601065
BP	GO:0007415	defasciculation of motor neuron axon	0.0046 (9/1936)	0.0029 (91/31285)	0.0688839	1	9	ARHGAP4/PTPRO/transcript:ENST00000483364/TNFAIP6/C1R/transcript:ENST00000443875/ARHGAP40	transcript:ENST00000479896/CSMD3
BP	GO:0061131	pancreas field specification	0.0021 (4/1936)	0.0009 (28/31285)	0.0690198	1	4	GDF15/INHBE/BMP6/INHBA
BP	GO:1902686	mitochondrial outer membrane permeabilization involved in programmed cell death	0.0021 (4/1936)	0.0009 (28/31285)	0.0690198	1	4	transcript:ENST00000472580/transcript:ENST00000429888/transcript:ENST00000569820	transcript:ENST00000415933
BP	GO:1904595	positive regulation of termination of RNA polymerase II transcription	0.0021 (4/1936)	0.0009 (28/31285)	0.0690198	1	4	transcript:ENST00000480240/DHX58/IFIH1/transcript:ENST00000478046
BP	GO:1903214	regulation of protein targeting to mitochondrion	0.0021 (4/1936)	0.0009 (28/31285)	0.0690198	1	4	transcript:ENST00000421484/transcript:ENST00000424354	transcript:ENST00000447768/transcript:ENST00000578469
BP	GO:0062123	regulation of linear element maturation	0.0021 (4/1936)	0.0009 (28/31285)	0.0690198	1	4	transcript:ENST00000409403/CDK18	CDK15/transcript:ENST00000555408
BP	GO:1904398	positive regulation of neuromuscular junction development	0.0021 (4/1936)	0.0009 (28/31285)	0.0690198	1	4	transcript:ENST00000434055	transcript:ENST00000611848/DCTN1/transcript:ENST00000415891
MF	GO:0070991	medium-chain fatty acyl-CoA dehydrogenase activity	0.0021 (4/1936)	0.0009 (28/31285)	0.0690198	1	4	transcript:ENST00000526129/transcript:ENST00000481262/transcript:ENST00000583858	ACADVL
BP	GO:0015818	isoleucine transport	0.0021 (4/1936)	0.0009 (28/31285)	0.0690198	1	4	SLC3A2/SLC7A7/SLC7A11/SLC7A5
BP	GO:0060462	lung lobe development	0.0021 (4/1936)	0.0009 (28/31285)	0.0690198	1	4	GDF15/INHBE/BMP6/INHBA
BP	GO:1990820	response to mitotic DNA integrity checkpoint signaling	0.0021 (4/1936)	0.0009 (28/31285)	0.0690198	1	4	transcript:ENST00000409403/CDK18	CDK15/transcript:ENST00000555408
BP	GO:1905757	negative regulation of primary cell septum biogenesis	0.0021 (4/1936)	0.0009 (28/31285)	0.0690198	1	4	transcript:ENST00000409403/CDK18	CDK15/transcript:ENST00000555408
BP	GO:0072441	response to meiotic DNA replication checkpoint signaling	0.0021 (4/1936)	0.0009 (28/31285)	0.0690198	1	4	transcript:ENST00000409403/CDK18	CDK15/transcript:ENST00000555408
BP	GO:1905785	negative regulation of anaphase-promoting complex-dependent catabolic process	0.0021 (4/1936)	0.0009 (28/31285)	0.0690198	1	4	transcript:ENST00000409403/CDK18	CDK15/transcript:ENST00000555408
BP	GO:0015821	methionine transport	0.0021 (4/1936)	0.0009 (28/31285)	0.0690198	1	4	SLC3A2/SLC7A7/SLC7A11/SLC7A5
CC	GO:0000178	exosome (RNase complex)	0.0021 (4/1936)	0.0009 (28/31285)	0.0690198	1	4	HELZ2/EXOSC6	transcript:ENST00000552994/transcript:ENST00000465229
MF	GO:0016627	oxidoreductase activity, acting on the CH-CH group of donors	0.0021 (4/1936)	0.0009 (28/31285)	0.0690198	1	4	SRD5A2/transcript:ENST00000481262/transcript:ENST00000583858	ACADVL
BP	GO:0090008	hypoblast development	0.0021 (4/1936)	0.0009 (28/31285)	0.0690198	1	4	GDF15/INHBE/BMP6/INHBA
BP	GO:1904537	negative regulation of mitotic telomere tethering at nuclear periphery	0.0021 (4/1936)	0.0009 (28/31285)	0.0690198	1	4	transcript:ENST00000409403/CDK18	CDK15/transcript:ENST00000555408
CC	GO:0035861	site of double-strand break	0.0217 (42/1936)	0.0189 (591/31285)	0.0692107	1	42	transcript:ENST00000482936/transcript:ENST00000307834/MNDA/DDX60/HIST1H2AG/transcript:ENST00000593946/transcript:ENST00000465003/transcript:ENST00000314088/transcript:ENST00000457179/transcript:ENST00000445387/IFIH1/transcript:ENST00000616321/DHX58/transcript:ENST00000507218/transcript:ENST00000558357/HELZ2/ATF3/transcript:ENST00000483148/transcript:ENST00000487279/transcript:ENST00000417500	transcript:ENST00000419510/transcript:ENST00000425046/transcript:ENST00000440787/transcript:ENST00000473015/transcript:ENST00000307849/transcript:ENST00000503703/transcript:ENST00000461221/transcript:ENST00000367667/transcript:ENST00000414983/RTEL1/RAD9B/transcript:ENST00000420201/transcript:ENST00000590193/transcript:ENST00000533482/DDB2/transcript:ENST00000522610/transcript:ENST00000522378/tran…
MF	GO:0005298	proline:sodium symporter activity	0.0031 (6/1936)	0.0017 (52/31285)	0.0697263	1	6	SLC5A10/SLC6A9	transcript:ENST00000566598/SLC38A6/transcript:ENST00000549258/SLC38A4
CC	GO:1904724	tertiary granule lumen	0.0196 (38/1936)	0.0169 (528/31285)	0.0698263	1	38	CTSZ/PTX3/LILRB2/ANPEP/TNFAIP6/C1R/CXCL3/UNC5B/RP11-295K3.1/OSCAR/MMP9/C1S/transcript:ENST00000534180/MRC1/LILRA6/PTPRO/MMP12/CXCL5/transcript:ENST00000429716/CXCL2/CTRL/transcript:ENST00000480073/transcript:ENST00000495564/CTSH/LILRB4/MMP3/LILRA5/SPTBN5/PSTPIP1/transcript:ENST00000512070/CXCL8	LRRTM4/transcript:ENST00000515800/transcript:ENST00000561139/transcript:ENST00000479896/LRRC17/transcript:ENST00000636494/FOLR3
BP	GO:0042092	type 2 immune response	0.0052 (10/1936)	0.0034 (105/31285)	0.0702042	1	10	LILRA5/transcript:ENST00000483665/LILRB2/LILRB4/SIGLEC1/FCGR1A/LILRA6/transcript:ENST00000507218	transcript:ENST00000419510/FCGR2A
BP	GO:0031622	positive regulation of fever generation	0.0052 (10/1936)	0.0034 (105/31285)	0.0702042	1	10	IL1RN/IL1B/CCR5/TNF/PLA2G4B/PTGS2/CCL8/CCL7/CCL3	JMJD7-PLA2G4B
BP	GO:0010557	positive regulation of macromolecule biosynthetic process	0.0010 (2/1936)	0.0003 (8/31285)	0.0702083	1	2	transcript:ENST00000443120	transcript:ENST00000590193
CC	GO:0070057	prospore membrane spindle pole body attachment site	0.0010 (2/1936)	0.0003 (8/31285)	0.0702083	1	2	IQGAP2	transcript:ENST00000633485
MF	GO:0106425	3,4-dihydroxyphenylacetaldehyde synthase activity	0.0010 (2/1936)	0.0003 (8/31285)	0.0702083	1	2	GAD1	transcript:ENST00000493875
BP	GO:0035963	cellular response to interleukin-13	0.0010 (2/1936)	0.0003 (8/31285)	0.0702083	1	2	ALOXE3/ALOX5
BP	GO:0090449	phloem glucosinolate loading	0.0010 (2/1936)	0.0003 (8/31285)	0.0702083	1	2	transcript:ENST00000541505/SLC15A3
MF	GO:0090448	glucosinolate:proton symporter activity	0.0010 (2/1936)	0.0003 (8/31285)	0.0702083	1	2	transcript:ENST00000541505/SLC15A3
BP	GO:0032202	telomere assembly	0.0010 (2/1936)	0.0003 (8/31285)	0.0702083	1	2	transcript:ENST00000609106/transcript:ENST00000607932
BP	GO:1900450	negative regulation of glutamate receptor signaling pathway	0.0010 (2/1936)	0.0003 (8/31285)	0.0702083	1	2	CCL8/CCL7
BP	GO:1901349	glucosinolate transport	0.0010 (2/1936)	0.0003 (8/31285)	0.0702083	1	2	transcript:ENST00000541505/SLC15A3
BP	GO:0019060	intracellular transport of viral protein in host cell	0.0010 (2/1936)	0.0003 (8/31285)	0.0702083	1	2	IFIT1/IFIT3
CC	GO:0042568	insulin-like growth factor binary complex	0.0010 (2/1936)	0.0003 (8/31285)	0.0702083	1	2	IGFBP3/IGFBP1
MF	GO:0005150	interleukin-1, type I receptor binding	0.0010 (2/1936)	0.0003 (8/31285)	0.0702083	1	2	IL1RN/IL1B
MF	GO:0045237	CXCR1 chemokine receptor binding	0.0010 (2/1936)	0.0003 (8/31285)	0.0702083	1	2	CCL8/CCL7
MF	GO:0036468	L-dopa decarboxylase activity	0.0010 (2/1936)	0.0003 (8/31285)	0.0702083	1	2	GAD1	transcript:ENST00000493875
MF	GO:0047545	2-hydroxyglutarate dehydrogenase activity	0.0010 (2/1936)	0.0003 (8/31285)	0.0702083	1	2	transcript:ENST00000400769/transcript:ENST00000436747
MF	GO:0009000	selenocysteine lyase activity	0.0010 (2/1936)	0.0003 (8/31285)	0.0702083	1	2	gene:ENSG00000272897/MOCOS
BP	GO:0006288	base-excision repair, DNA ligation	0.0010 (2/1936)	0.0003 (8/31285)	0.0702083	1	2	transcript:ENST00000601091/transcript:ENST00000594759
MF	GO:0004483	mRNA (nucleoside-2'-O-)-methyltransferase activity	0.0010 (2/1936)	0.0003 (8/31285)	0.0702083	1	2	PARP9/transcript:ENST00000475364
BP	GO:0140207	tripeptide import across plasma membrane	0.0010 (2/1936)	0.0003 (8/31285)	0.0702083	1	2	transcript:ENST00000541505/SLC15A3
MF	GO:0042937	tripeptide transmembrane transporter activity	0.0010 (2/1936)	0.0003 (8/31285)	0.0702083	1	2	transcript:ENST00000541505/SLC15A3
BP	GO:0042939	tripeptide transport	0.0010 (2/1936)	0.0003 (8/31285)	0.0702083	1	2	transcript:ENST00000541505/SLC15A3
MF	GO:0090440	abscisic acid transmembrane transporter activity	0.0010 (2/1936)	0.0003 (8/31285)	0.0702083	1	2	transcript:ENST00000541505/SLC15A3
MF	GO:0071916	dipeptide transmembrane transporter activity	0.0010 (2/1936)	0.0003 (8/31285)	0.0702083	1	2	transcript:ENST00000541505/SLC15A3
BP	GO:0051041	positive regulation of calcium-independent cell-cell adhesion	0.0010 (2/1936)	0.0003 (8/31285)	0.0702083	1	2	CCL8/CCL7
BP	GO:2000814	positive regulation of barbed-end actin filament capping	0.0010 (2/1936)	0.0003 (8/31285)	0.0702083	1	2		transcript:ENST00000414983/transcript:ENST00000420201
BP	GO:0033023	mast cell homeostasis	0.0010 (2/1936)	0.0003 (8/31285)	0.0702083	1	2	transcript:ENST00000541505/SLC15A3
BP	GO:0035505	positive regulation of myosin light chain kinase activity	0.0010 (2/1936)	0.0003 (8/31285)	0.0702083	1	2	IL1RN/IL1B
MF	GO:0047677	arachidonate 8(R)-lipoxygenase activity	0.0010 (2/1936)	0.0003 (8/31285)	0.0702083	1	2	ALOXE3/ALOX5
BP	GO:0048262	determination of dorsal/ventral asymmetry	0.0010 (2/1936)	0.0003 (8/31285)	0.0702083	1	2	IRAK3/JUP
BP	GO:0045338	farnesyl diphosphate metabolic process	0.0010 (2/1936)	0.0003 (8/31285)	0.0702083	1	2	transcript:ENST00000525283	transcript:ENST00000525607
BP	GO:0046952	ketone body catabolic process	0.0010 (2/1936)	0.0003 (8/31285)	0.0702083	1	2	OXCT2	transcript:ENST00000478631
MF	GO:0032142	single guanine insertion binding	0.0010 (2/1936)	0.0003 (8/31285)	0.0702083	1	2	transcript:ENST00000312087	transcript:ENST00000353275
MF	GO:0080054	low-affinity nitrate transmembrane transporter activity	0.0010 (2/1936)	0.0003 (8/31285)	0.0702083	1	2	transcript:ENST00000541505/SLC15A3
BP	GO:1904082	pyrimidine nucleobase transmembrane transport	0.0010 (2/1936)	0.0003 (8/31285)	0.0702083	1	2	transcript:ENST00000540386	SLC29A2
MF	GO:0015333	peptide:proton symporter activity	0.0010 (2/1936)	0.0003 (8/31285)	0.0702083	1	2	transcript:ENST00000541505/SLC15A3
BP	GO:0036023	embryonic skeletal limb joint morphogenesis	0.0010 (2/1936)	0.0003 (8/31285)	0.0702083	1	2	OSR2/JUP
BP	GO:0019543	propionate catabolic process	0.0010 (2/1936)	0.0003 (8/31285)	0.0702083	1	2	PCK2	transcript:ENST00000546891
BP	GO:1903479	mitotic actomyosin contractile ring assembly actin filament organization	0.0010 (2/1936)	0.0003 (8/31285)	0.0702083	1	2	IQGAP2	transcript:ENST00000633485
MF	GO:1990055	phenylacetaldehyde synthase activity	0.0010 (2/1936)	0.0003 (8/31285)	0.0702083	1	2	GAD1	transcript:ENST00000493875
BP	GO:1902025	nitrate import	0.0010 (2/1936)	0.0003 (8/31285)	0.0702083	1	2	IRAK3	transcript:ENST00000568004
MF	GO:0032143	single thymine insertion binding	0.0010 (2/1936)	0.0003 (8/31285)	0.0702083	1	2	transcript:ENST00000312087	transcript:ENST00000353275
MF	GO:0009978	allene oxide synthase activity	0.0010 (2/1936)	0.0003 (8/31285)	0.0702083	1	2	ALOXE3/ALOX5
CC	GO:1990622	CHOP-ATF3 complex	0.0010 (2/1936)	0.0003 (8/31285)	0.0702083	1	2	DDIT3/ATF3
CC	GO:0035869	ciliary transition zone	0.0114 (22/1936)	0.0089 (280/31285)	0.0702155	1	22	FCER1G/CDKL3/transcript:ENST00000518116/transcript:ENST00000618568/SEPT5/transcript:ENST00000559883/transcript:ENST00000269361/transcript:ENST00000518360/transcript:ENST00000464497/transcript:ENST00000432684	BBS4/RP11-345J4.3/transcript:ENST00000509849/transcript:ENST00000382240/C14orf105/transcript:ENST00000555408/transcript:ENST00000488206/transcript:ENST00000510106/FAM92A/CDKL5/transcript:ENST00000393120/transcript:ENST00000455843
BP	GO:0036006	cellular response to macrophage colony-stimulating factor stimulus	0.0077 (15/1936)	0.0056 (176/31285)	0.070331	1	15	LRRK1/FLT1/PTPRO/SH2D3C/CCL7/BTK/ROS1/CCL8/CCL3	transcript:ENST00000479896/PDE3A/PDE11A/transcript:ENST00000515800/ITK/transcript:ENST00000504875
CC	GO:0042645	mitochondrial nucleoid	0.0108 (21/1936)	0.0085 (265/31285)	0.0704315	1	21	transcript:ENST00000395745/ESRP1/ESRP2/transcript:ENST00000583858/SDS/transcript:ENST00000565012/transcript:ENST00000631044/transcript:ENST00000491736/transcript:ENST00000557433/transcript:ENST00000557348/transcript:ENST00000553837/ALDH1A1/transcript:ENST00000555563/transcript:ENST00000481262	ACADVL/transcript:ENST00000590558/transcript:ENST00000504902/transcript:ENST00000441384/transcript:ENST00000556825/DHRS9/RDH5
CC	GO:0036062	presynaptic periactive zone	0.0041 (8/1936)	0.0025 (78/31285)	0.0704566	1	8	BCAM/transcript:ENST00000460679/SCARF1/transcript:ENST00000554738/NTNG2/transcript:ENST00000591662	NRXN3/NCAM2
BP	GO:0070262	peptidyl-serine dephosphorylation	0.0041 (8/1936)	0.0025 (78/31285)	0.0704566	1	8	SSH3/transcript:ENST00000478046/PPM1D/DNAJC7/DUSP1	transcript:ENST00000532881/transcript:ENST00000588814/transcript:ENST00000392995
CC	GO:0005704	polytene chromosome band	0.0041 (8/1936)	0.0025 (78/31285)	0.0704566	1	8	HOXD9/transcript:ENST00000558084/transcript:ENST00000314088/transcript:ENST00000413704/transcript:ENST00000445387/HIST1H2AG	transcript:ENST00000465045/KMT2C
BP	GO:0006865	amino acid transport	0.0103 (20/1936)	0.0080 (250/31285)	0.0705075	1	20	transcript:ENST00000538239/DGCR2/SLC6A9/SLC7A5/transcript:ENST00000636866/SLC7A11/SLC22A14/transcript:ENST00000394606/SLC7A7/SLC1A4/ABCA5/SLC16A10/SLC3A2	transcript:ENST00000566598/SLC38A6/transcript:ENST00000568422/SLC38A4/transcript:ENST00000586995/transcript:ENST00000637871/transcript:ENST00000549258
BP	GO:0140052	cellular response to oxidised low-density lipoprotein particle stimulus	0.0057 (11/1936)	0.0038 (119/31285)	0.0706507	1	11	C8orf44-SGK3/TLR2/CD300C/TLR4/CD36/SMPD3/RPS6KA2/transcript:ENST00000556575/RP11-407N17.3	MIA2/RP11-47I22.4
BP	GO:2001243	negative regulation of intrinsic apoptotic signaling pathway	0.0129 (25/1936)	0.0104 (326/31285)	0.0708613	1	25	MX2/DDX3Y/ROS1/MMP9/transcript:ENST00000429888/BTK/RPS6KA2/transcript:ENST00000472580/MRC1/transcript:ENST00000558357/MMP12/HCK/transcript:ENST00000421484/VIP/MMP3/C8orf44-SGK3/SLA/KLHDC7B/transcript:ENST00000556575/MX1	ITK/RP11-47I22.4/transcript:ENST00000415933/BCL2L2-PABPN1/transcript:ENST00000465045
BP	GO:0090209	negative regulation of triglyceride metabolic process	0.0036 (7/1936)	0.0021 (65/31285)	0.0709868	1	7	NR4A1/transcript:ENST00000424354/CCNL1/ESR1	transcript:ENST00000335760/transcript:ENST00000484049/transcript:ENST00000578469
BP	GO:0043666	obsolete regulation of phosphoprotein phosphatase activity	0.0036 (7/1936)	0.0021 (65/31285)	0.0709868	1	7	TNFAIP6/transcript:ENST00000616467/MRC1	transcript:ENST00000482010/transcript:ENST00000540297/transcript:ENST00000512639/CHODL
BP	GO:0097116	gephyrin clustering involved in postsynaptic density assembly	0.0036 (7/1936)	0.0021 (65/31285)	0.0709868	1	7	CES1/CES3/transcript:ENST00000554738/transcript:ENST00000591662	transcript:ENST00000482958/NRXN3/LRRC17
CC	GO:0070938	contractile ring	0.0036 (7/1936)	0.0021 (65/31285)	0.0709868	1	7	RP11-468E2.1/SEPT5/AURKC/transcript:ENST00000533523	ANLN/transcript:ENST00000455843/transcript:ENST00000490528
BP	GO:1903421	regulation of synaptic vesicle recycling	0.0036 (7/1936)	0.0021 (65/31285)	0.0709868	1	7	CDKL3/CDK18	transcript:ENST00000555408/CDKL5/transcript:ENST00000510106/transcript:ENST00000566631/CDK15
BP	GO:0062033	positive regulation of mitotic sister chromatid segregation	0.0036 (7/1936)	0.0021 (65/31285)	0.0709868	1	7	CDKL3/AURKC/CDK18	transcript:ENST00000555408/CDKL5/transcript:ENST00000566631/CDK15
BP	GO:0034156	negative regulation of toll-like receptor 7 signaling pathway	0.0026 (5/1936)	0.0013 (40/31285)	0.0713431	1	5	LILRA5/LILRB2/LILRA6/LILRB4/OSCAR
BP	GO:2000290	regulation of myotome development	0.0026 (5/1936)	0.0013 (40/31285)	0.0713431	1	5	INHBE/GDF15/transcript:ENST00000635811/BMP6/INHBA
MF	GO:0005295	neutral L-amino acid:sodium symporter activity	0.0026 (5/1936)	0.0013 (40/31285)	0.0713431	1	5	SLC6A9	transcript:ENST00000566598/SLC38A6/transcript:ENST00000549258/SLC38A4
BP	GO:1900106	positive regulation of hyaluranon cable assembly	0.0026 (5/1936)	0.0013 (40/31285)	0.0713431	1	5	INHBE/GDF15/BMP6/HAS1/INHBA
BP	GO:0035418	protein localization to synapse	0.0165 (32/1936)	0.0139 (435/31285)	0.0719631	1	32	EBI3/CDKL3/transcript:ENST00000467906/CES3/transcript:ENST00000591662/CES1/SYTL1/SYT7/DCN/INPP5J/transcript:ENST00000554738/DLGAP1/RP11-73M18.2/PRKRA/PTPRO/DYSF/CDK18	MPP4/LRRTM4/SYTL5/CDK15/transcript:ENST00000479896/transcript:ENST00000482958/transcript:ENST00000566631/LRRC17/transcript:ENST00000555408/NRXN3/SYTL2/transcript:ENST00000510106/transcript:ENST00000424699/transcript:ENST00000455997/CDKL5
BP	GO:0035332	positive regulation of hippo signaling	0.0176 (34/1936)	0.0149 (467/31285)	0.0730511	1	34	ROS1/SCHIP1/transcript:ENST00000421674/transcript:ENST00000591662/ADAP2/BTK/transcript:ENST00000554738/transcript:ENST00000375290/transcript:ENST00000616321/IRAK3/transcript:ENST00000269361/PTPRO/HCK/RBM39/gene:ENSG00000255663/transcript:ENST00000495564/SLA/SPTBN5/PSTPIP1/transcript:ENST00000512070/EPB41L3	PTCH1/ITK/SOX7/CDHR3/transcript:ENST00000479896/transcript:ENST00000559133/transcript:ENST00000542140/NRXN3/gene:ENSG00000273167/transcript:ENST00000338163/transcript:ENST00000573196/transcript:ENST00000466227/IQCJ-SCHIP1
MF	GO:0070492	oligosaccharide binding	0.0062 (12/1936)	0.0043 (134/31285)	0.0736531	1	12	LGALS9/C2/CD163/transcript:ENST00000588198/PAPPA2/transcript:ENST00000534254/RP11-295K3.1/transcript:ENST00000587251	HS6ST3/CD6/CHODL/CSMD3
BP	GO:0051384	response to glucocorticoid	0.0418 (81/1936)	0.0393 (1229/31285)	0.0736699	1	81	C1R/CXCL3/transcript:ENST00000569544/CES1/IGFBP3/CCL8/CYP27B1/IL1RN/TLR4/ATF3/INHBE/transcript:ENST00000526129/MERTK/C1QB/PTGS2/SSH3/PNLIPRP3/PTPRO/CXCL5/transcript:ENST00000529473/DUSP1/TLR2/C1QA/CXCL8/transcript:ENST00000556575/IL1B/FABP4/IL6/TNF/CES3/ESR1/CCL3/transcript:ENST00000583858/ABCA10/PTGDS/INHBA/MRC1/KCNJ3/PCK2/SH2D3C/BMP6/ADAMTS5/transcript:ENST00000522484/SLCO2B1/CCL7/CTSH/C8orf44-…	transcript:ENST00000479896/transcript:ENST00000532881/transcript:ENST00000482958/transcript:ENST00000526491/transcript:ENST00000586995/JMJD7-PLA2G4B/MAP2K3/DHRS9/RDH5/transcript:ENST00000472940/ACADVL/SLC9A7/transcript:ENST00000560014/transcript:ENST00000382240/transcript:ENST00000485036/transcript:ENST00000426902/PRLR/GIPR/BCL2L2-PABPN1/transcript:ENST00000468065
BP	GO:0009062	fatty acid catabolic process	0.0052 (10/1936)	0.0034 (106/31285)	0.0738204	1	10	transcript:ENST00000496241/transcript:ENST00000442122/VDR/transcript:ENST00000583858/transcript:ENST00000593532/transcript:ENST00000486165/transcript:ENST00000481262	LPIN1/ACADVL/ECI2
BP	GO:0032308	positive regulation of prostaglandin secretion	0.0052 (10/1936)	0.0034 (106/31285)	0.0738204	1	10	IL1RN/IL1A/transcript:ENST00000543984/GPR35/PLA2G4B/PTGES/P2RX7/IL1B	JMJD7-PLA2G4B/MAP2K3
BP	GO:1904044	response to aldosterone	0.0119 (23/1936)	0.0095 (297/31285)	0.0740355	1	23	NR1I3/VDR/CXCL3/NCF4/CARD9/BTK/INHBA/transcript:ENST00000454046/PTPRO/BMP6/CXCL5/HCK/CXCL2/SLA/INHBE/transcript:ENST00000593532/CXCL8/SLC12A7/ASNS	ITK/transcript:ENST00000479896/NOSTRIN/transcript:ENST00000455743
BP	GO:2000272	negative regulation of signaling receptor activity	0.0072 (14/1936)	0.0052 (163/31285)	0.0745861	1	14	LILRA5/VDR/PTPRO/LILRB2/TNF/transcript:ENST00000593532/LILRB4/CLEC12A/HLA-F/ULBP1/HLA-C/LILRA6/OSCAR	transcript:ENST00000479896
BP	GO:0034116	positive regulation of heterotypic cell-cell adhesion	0.0088 (17/1936)	0.0066 (207/31285)	0.074653	1	17	IL1RN/transcript:ENST00000580805/INHBE/transcript:ENST00000460679/SLA/ALOX5/SCARF1/GDF15/TNF/ALOXE3/BMP6/BTK/HCK/gene:ENSG00000259753/INHBA/IL1B	ITK
CC	GO:0098984	neuron to neuron synapse	0.0041 (8/1936)	0.0025 (79/31285)	0.0747385	1	8	CES1/CES3/transcript:ENST00000554738/transcript:ENST00000591662	transcript:ENST00000465172/transcript:ENST00000482958/NRXN3/transcript:ENST00000466678
BP	GO:0060688	regulation of morphogenesis of a branching structure	0.0041 (8/1936)	0.0025 (79/31285)	0.0747385	1	8	INHBE/FLT1/GDF15/BMP6/PGF/INHBA/ROS1	transcript:ENST00000504875
MF	GO:0035612	AP-2 adaptor complex binding	0.0041 (8/1936)	0.0025 (79/31285)	0.0747385	1	8	FCHO1/DYSF/FAM43A/GAS7/transcript:ENST00000576235	TBC1D5/transcript:ENST00000472827/GABRQ
BP	GO:0032677	regulation of interleukin-8 production	0.0041 (8/1936)	0.0025 (79/31285)	0.0747385	1	8	CD163/PTX3/PTPRO/transcript:ENST00000588198/C5AR1/transcript:ENST00000587251	transcript:ENST00000479896/CD6
BP	GO:1905345	protein localization to cleavage furrow	0.0031 (6/1936)	0.0017 (53/31285)	0.0750812	1	6	MX2/IQGAP2/SPTBN5/MX1	transcript:ENST00000420627/transcript:ENST00000633485
BP	GO:0000467	exonucleolytic trimming to generate mature 3'-end of 5.8S rRNA from tricistronic rRNA transcript (SSU-rRNA, 5.8S rRNA, LSU-rRNA)	0.0031 (6/1936)	0.0017 (53/31285)	0.0750812	1	6	transcript:ENST00000536606/ISG20/HELZ2/EXOSC6/DDX60	transcript:ENST00000465229
BP	GO:0033210	leptin-mediated signaling pathway	0.0031 (6/1936)	0.0017 (53/31285)	0.0750812	1	6	EBI3/transcript:ENST00000452281/STAT1/transcript:ENST00000395594	LEPR/BBS4
BP	GO:0071042	nuclear polyadenylation-dependent mRNA catabolic process	0.0036 (7/1936)	0.0021 (66/31285)	0.0757601	1	7	transcript:ENST00000507392/HELZ2/EXOSC6/DDX3Y/transcript:ENST00000357464/DDX60	transcript:ENST00000465229
BP	GO:0038172	interleukin-33-mediated signaling pathway	0.0036 (7/1936)	0.0021 (66/31285)	0.0757601	1	7	IL18R1/LRRK1/TLR2/IL1RL1/transcript:ENST00000369973/IRAK3	transcript:ENST00000552309
BP	GO:0007344	pronuclear fusion	0.0036 (7/1936)	0.0021 (66/31285)	0.0757601	1	7	CDKL3/transcript:ENST00000496634/CDK18	transcript:ENST00000555408/CDKL5/transcript:ENST00000566631/CDK15
BP	GO:2000565	negative regulation of CD8-positive, alpha-beta T cell proliferation	0.0015 (3/1936)	0.0006 (18/31285)	0.076508	1	3	transcript:ENST00000425141	SLC4A4/SLC4A3
CC	GO:0032936	SREBP-SCAP complex	0.0015 (3/1936)	0.0006 (18/31285)	0.076508	1	3	transcript:ENST00000424354/transcript:ENST00000441517	PTCH1
BP	GO:1900082	negative regulation of arginine catabolic process	0.0015 (3/1936)	0.0006 (18/31285)	0.076508	1	3	ATP11A/ATP8B3	ATP8A1
BP	GO:2000213	positive regulation of glutamate metabolic process	0.0015 (3/1936)	0.0006 (18/31285)	0.076508	1	3	transcript:ENST00000593532/NR1I3/VDR
BP	GO:1903249	negative regulation of citrulline biosynthetic process	0.0015 (3/1936)	0.0006 (18/31285)	0.076508	1	3	ATP11A/ATP8B3	ATP8A1
CC	GO:0099738	cell cortex region	0.0015 (3/1936)	0.0006 (18/31285)	0.076508	1	3	transcript:ENST00000434055	DCTN1/transcript:ENST00000415891
BP	GO:0090708	specification of plant organ axis polarity	0.0015 (3/1936)	0.0006 (18/31285)	0.076508	1	3	LRRC2/transcript:ENST00000519261	transcript:ENST00000568004
BP	GO:0044206	UMP salvage	0.0015 (3/1936)	0.0006 (18/31285)	0.076508	1	3	transcript:ENST00000462091/transcript:ENST00000479719	transcript:ENST00000467167
BP	GO:0090322	regulation of superoxide metabolic process	0.0015 (3/1936)	0.0006 (18/31285)	0.076508	1	3	CBSL/SH2D3C/CBS
CC	GO:1904144	phosphatidylinositol phosphate phosphatase complex	0.0015 (3/1936)	0.0006 (18/31285)	0.076508	1	3	MTMR1/MTMR10/transcript:ENST00000530200
BP	GO:0120117	T cell meandering migration	0.0015 (3/1936)	0.0006 (18/31285)	0.076508	1	3	MYO15B/MYO1G/MYO1F
BP	GO:0034021	response to silicon dioxide	0.0015 (3/1936)	0.0006 (18/31285)	0.076508	1	3	CSF2	transcript:ENST00000420201/transcript:ENST00000414983
BP	GO:1905671	regulation of lysosome organization	0.0015 (3/1936)	0.0006 (18/31285)	0.076508	1	3	TREX2/CD36/TREX1
CC	GO:0030526	granulocyte macrophage colony-stimulating factor receptor complex	0.0015 (3/1936)	0.0006 (18/31285)	0.076508	1	3	IL2RG/CSF2RB/CSF2
BP	GO:0038157	granulocyte-macrophage colony-stimulating factor signaling pathway	0.0015 (3/1936)	0.0006 (18/31285)	0.076508	1	3	IL2RG/CSF2RB/CSF2
BP	GO:0098736	negative regulation of the force of heart contraction	0.0015 (3/1936)	0.0006 (18/31285)	0.076508	1	3	ATP11A/ATP8B3	ATP8A1
BP	GO:1905454	negative regulation of myeloid progenitor cell differentiation	0.0015 (3/1936)	0.0006 (18/31285)	0.076508	1	3	transcript:ENST00000558084/transcript:ENST00000534320	KMT2C
CC	GO:1901588	dendritic microtubule	0.0015 (3/1936)	0.0006 (18/31285)	0.076508	1	3	transcript:ENST00000434055	DCTN1/transcript:ENST00000415891
BP	GO:0035790	platelet-derived growth factor receptor-alpha signaling pathway	0.0015 (3/1936)	0.0006 (18/31285)	0.076508	1	3	transcript:ENST00000520579/FLT1	transcript:ENST00000504875
BP	GO:0042811	pheromone biosynthetic process	0.0015 (3/1936)	0.0006 (18/31285)	0.076508	1	3	CES1	transcript:ENST00000478631/SCD
CC	GO:0035354	Toll-like receptor 1-Toll-like receptor 2 protein complex	0.0015 (3/1936)	0.0006 (18/31285)	0.076508	1	3	TLR4/TLR2/IL1RL1
BP	GO:0072429	response to intra-S DNA damage checkpoint signaling	0.0015 (3/1936)	0.0006 (18/31285)	0.076508	1	3	EME2/HELZ2/transcript:ENST00000524647
BP	GO:0071976	cell gliding	0.0015 (3/1936)	0.0006 (18/31285)	0.076508	1	3	MYO15B/MYO1G/MYO1F
BP	GO:2001251	negative regulation of chromosome organization	0.0015 (3/1936)	0.0006 (18/31285)	0.076508	1	3	transcript:ENST00000445387	transcript:ENST00000425046/transcript:ENST00000413809
MF	GO:0031735	CCR10 chemokine receptor binding	0.0015 (3/1936)	0.0006 (18/31285)	0.076508	1	3	CXCL8/CCL20/CCL3
BP	GO:0042495	detection of triacyl bacterial lipopeptide	0.0015 (3/1936)	0.0006 (18/31285)	0.076508	1	3	TLR4/TLR2/IL1RL1
BP	GO:0071650	negative regulation of chemokine (C-C motif) ligand 5 production	0.0021 (4/1936)	0.0009 (29/31285)	0.0766653	1	4	OAS1/OAS2/OAS3	TICAM2
BP	GO:0019372	lipoxygenase pathway	0.0021 (4/1936)	0.0009 (29/31285)	0.0766653	1	4	transcript:ENST00000442122/ALOXE3/ALOX5/GPX3
BP	GO:1903699	tarsal gland development	0.0021 (4/1936)	0.0009 (29/31285)	0.0766653	1	4	transcript:ENST00000445387/transcript:ENST00000413704	SCD/transcript:ENST00000334884
BP	GO:0010588	cotyledon vascular tissue pattern formation	0.0021 (4/1936)	0.0009 (29/31285)	0.0766653	1	4	INPP5J/transcript:ENST00000514671/transcript:ENST00000502762	transcript:ENST00000630114
BP	GO:0090194	negative regulation of glomerulus development	0.0021 (4/1936)	0.0009 (29/31285)	0.0766653	1	4	GDF15/INHBE/BMP6/INHBA
BP	GO:1905263	positive regulation of meiotic DNA double-strand break formation involved in reciprocal meiotic recombination	0.0021 (4/1936)	0.0009 (29/31285)	0.0766653	1	4	transcript:ENST00000409403/CDK18	CDK15/transcript:ENST00000555408
BP	GO:0060537	muscle tissue development	0.0021 (4/1936)	0.0009 (29/31285)	0.0766653	1	4	transcript:ENST00000409403/transcript:ENST00000585841	transcript:ENST00000486607/CSRP3
BP	GO:1903025	regulation of RNA polymerase II regulatory region sequence-specific DNA binding	0.0021 (4/1936)	0.0009 (29/31285)	0.0766653	1	4	transcript:ENST00000445387/transcript:ENST00000312087	transcript:ENST00000353275/transcript:ENST00000431180
BP	GO:1904434	positive regulation of ferrous iron binding	0.0021 (4/1936)	0.0009 (29/31285)	0.0766653	1	4	HLA-F/ULBP1/HLA-C	transcript:ENST00000561139
BP	GO:0010980	positive regulation of vitamin D 24-hydroxylase activity	0.0021 (4/1936)	0.0009 (29/31285)	0.0766653	1	4	CYP27B1/NR1I3/VDR/transcript:ENST00000593532
BP	GO:0060503	bud dilation involved in lung branching	0.0021 (4/1936)	0.0009 (29/31285)	0.0766653	1	4	GDF15/INHBE/BMP6/INHBA
BP	GO:1904437	positive regulation of transferrin receptor binding	0.0021 (4/1936)	0.0009 (29/31285)	0.0766653	1	4	HLA-F/ULBP1/HLA-C	transcript:ENST00000561139
BP	GO:0060592	mammary gland formation	0.0021 (4/1936)	0.0009 (29/31285)	0.0766653	1	4	GDF15/INHBE/BMP6/INHBA
BP	GO:0032222	regulation of synaptic transmission, cholinergic	0.0021 (4/1936)	0.0009 (29/31285)	0.0766653	1	4	CAMK1D/TRIB3/ERN1	DCLK1
MF	GO:0019766	IgA receptor activity	0.0021 (4/1936)	0.0009 (29/31285)	0.0766653	1	4	LILRB2/LILRA5/LILRB4/LILRA6
BP	GO:1905375	cellular response to homocysteine	0.0021 (4/1936)	0.0009 (29/31285)	0.0766653	1	4	CAMK1D/TRIB3/ERN1	DCLK1
BP	GO:0035610	protein side chain deglutamylation	0.0021 (4/1936)	0.0009 (29/31285)	0.0766653	1	4	transcript:ENST00000487078/transcript:ENST00000464497/transcript:ENST00000518360	AGBL5
BP	GO:1905770	regulation of mesodermal cell differentiation	0.0021 (4/1936)	0.0009 (29/31285)	0.0766653	1	4	GDF15/INHBE/BMP6/INHBA
BP	GO:0071730	beak formation	0.0021 (4/1936)	0.0009 (29/31285)	0.0766653	1	4	GDF15/INHBE/BMP6/INHBA
BP	GO:0001507	acetylcholine catabolic process in synaptic cleft	0.0021 (4/1936)	0.0009 (29/31285)	0.0766653	1	4	CES1/CES3/C1QC	transcript:ENST00000482958
BP	GO:0043011	myeloid dendritic cell differentiation	0.0114 (22/1936)	0.0090 (283/31285)	0.0767117	1	22	CSF2/SCARF1/LILRB2/IRF7/OSCAR/CAMK1D/GIMAP4/IRF5/IRF8/LILRA6/ATF3/transcript:ENST00000533182/BATF2/LILRB4/transcript:ENST00000515231/LILRA5/EHF/IRF9	ELF5/transcript:ENST00000559133/DCLK1/RDH5
BP	GO:1990009	retinal cell apoptotic process	0.0046 (9/1936)	0.0030 (93/31285)	0.0767411	1	9	INHBE/transcript:ENST00000576863/GDF15/BMP6/transcript:ENST00000334075/KRBOX1/INHBA	PDE11A/transcript:ENST00000576500
BP	GO:0015074	DNA integration	0.0046 (9/1936)	0.0030 (93/31285)	0.0767411	1	9	transcript:ENST00000576863/transcript:ENST00000601091/ZNF396/transcript:ENST00000445387/transcript:ENST00000334075/transcript:ENST00000594759	transcript:ENST00000425046/transcript:ENST00000413809/transcript:ENST00000576500
BP	GO:0033119	negative regulation of RNA splicing	0.0062 (12/1936)	0.0043 (135/31285)	0.0769261	1	12	C8orf44-SGK3/transcript:ENST00000502762/RPS6KA2/transcript:ENST00000401730/transcript:ENST00000556575/transcript:ENST00000514671	BCL2L2-PABPN1/transcript:ENST00000552635/RP11-47I22.4/transcript:ENST00000388749/transcript:ENST00000601065/transcript:ENST00000630114
BP	GO:2000781	positive regulation of double-strand break repair	0.0108 (21/1936)	0.0086 (268/31285)	0.0771398	1	21	transcript:ENST00000534320/transcript:ENST00000482936/transcript:ENST00000421364/transcript:ENST00000558084/transcript:ENST00000495733/FMNL3/transcript:ENST00000552674/transcript:ENST00000558357/transcript:ENST00000518360/transcript:ENST00000520595/transcript:ENST00000483534/transcript:ENST00000312087	transcript:ENST00000353275/transcript:ENST00000441123/transcript:ENST00000522117/transcript:ENST00000468435/RTEL1/transcript:ENST00000572105/KMT2C/transcript:ENST00000454871/transcript:ENST00000425660
BP	GO:0006898	receptor-mediated endocytosis	0.0382 (74/1936)	0.0357 (1117/31285)	0.0773905	1	74	transcript:ENST00000538239/CD163/SCARF1/transcript:ENST00000483665/MX2/COL9A2/CES3/transcript:ENST00000588198/MYO1G/TNFAIP6/CD14/ARHGAP40/ROS1/transcript:ENST00000636866/MYO1F/CES1/ARHGAP4/FAM43A/gene:ENSG00000259753/transcript:ENST00000554738/SIGLEC1/transcript:ENST00000607882/transcript:ENST00000495242/FPR3/MRC1/transcript:ENST00000587251/IFITM1/CD300C/gene:ENSG00000268975/transcript:ENST000004…	CD300LB/CSMD3/transcript:ENST00000482958/COL13A1/SLC9A7/transcript:ENST00000568422/ADORA2A/transcript:ENST00000448926/transcript:ENST00000617103/COL17A1/NRXN3/CHODL/NCAM2/FOLR3/transcript:ENST00000637871/FCGR2A/CD6/ITGA10/transcript:ENST00000544223
BP	GO:1903241	U2-type prespliceosome assembly	0.0057 (11/1936)	0.0039 (121/31285)	0.0775314	1	11	transcript:ENST00000507392/transcript:ENST00000502762/RBM39/transcript:ENST00000600289/gene:ENSG00000255663/transcript:ENST00000475126	transcript:ENST00000577940/transcript:ENST00000439775/transcript:ENST00000338163/LSM4/transcript:ENST00000542140
CC	GO:0005652	nuclear lamina	0.0052 (10/1936)	0.0034 (107/31285)	0.0775512	1	10	transcript:ENST00000374611/transcript:ENST00000593532/transcript:ENST00000445387/TM7SF2/transcript:ENST00000581795/transcript:ENST00000565425	MPP4/transcript:ENST00000413809/transcript:ENST00000374930/transcript:ENST00000582907
BP	GO:0021697	cerebellar cortex formation	0.0052 (10/1936)	0.0034 (107/31285)	0.0775512	1	10	CDKL3/CDK18	transcript:ENST00000479896/MAP2K3/transcript:ENST00000555408/CDKL5/transcript:ENST00000510106/transcript:ENST00000515800/transcript:ENST00000566631/CDK15
BP	GO:0046850	regulation of bone remodeling	0.0072 (14/1936)	0.0052 (164/31285)	0.0775541	1	14	EBI3/SYTL1/FLT1/transcript:ENST00000546201/SYT7/PLA2G4B/UNC13D/GJD3	JMJD7-PLA2G4B/LEPR/transcript:ENST00000512630/SYTL2/SYTL5/transcript:ENST00000504875
BP	GO:0006029	proteoglycan metabolic process	0.0072 (14/1936)	0.0052 (164/31285)	0.0775541	1	14	ADAMTS14/transcript:ENST00000505433/INHBE/GDF15/ADAMTS5/transcript:ENST00000593532/INHBA/BMP6/COL9A2/UNC5B	COL17A1/COL13A1/transcript:ENST00000564415/transcript:ENST00000480814
BP	GO:0072134	nephrogenic mesenchyme morphogenesis	0.0026 (5/1936)	0.0013 (41/31285)	0.0776806	1	5	INHBE/GDF15/BMP6/INHBA	transcript:ENST00000611848
BP	GO:0002578	negative regulation of antigen processing and presentation	0.0026 (5/1936)	0.0013 (41/31285)	0.0776806	1	5	LILRA5/LILRB2/LILRA6/LILRB4/OSCAR
BP	GO:0002220	innate immune response activating cell surface receptor signaling pathway	0.0026 (5/1936)	0.0013 (41/31285)	0.0776806	1	5	LILRA5/LILRB2/LILRA6/LILRB4/OSCAR
MF	GO:0023025	MHC class Ib protein complex binding	0.0026 (5/1936)	0.0013 (41/31285)	0.0776806	1	5	LILRA5/LILRB2/LILRA6/LILRB4/OSCAR
BP	GO:0045584	negative regulation of cytotoxic T cell differentiation	0.0026 (5/1936)	0.0013 (41/31285)	0.0776806	1	5	LILRA5/LILRB2/LILRA6/LILRB4/OSCAR
BP	GO:0002865	negative regulation of acute inflammatory response to antigenic stimulus	0.0026 (5/1936)	0.0013 (41/31285)	0.0776806	1	5	transcript:ENST00000483665/transcript:ENST00000610164/VIP/FCGR1A	FCGR2A
BP	GO:2000524	negative regulation of T cell costimulation	0.0026 (5/1936)	0.0013 (41/31285)	0.0776806	1	5	LILRA5/LILRB2/LILRA6/LILRB4/OSCAR
BP	GO:0014015	positive regulation of gliogenesis	0.0026 (5/1936)	0.0013 (41/31285)	0.0776806	1	5	IL6/INPP5J/HES1	transcript:ENST00000455997/SOX7
BP	GO:0061975	articular cartilage development	0.0026 (5/1936)	0.0013 (41/31285)	0.0776806	1	5	FLRT1/ECM2/DCN	LRRTM4/transcript:ENST00000513998
BP	GO:2001193	positive regulation of gamma-delta T cell activation involved in immune response	0.0026 (5/1936)	0.0013 (41/31285)	0.0776806	1	5	LILRA5/LILRB2/LILRA6/LILRB4/OSCAR
BP	GO:0140105	interleukin-10-mediated signaling pathway	0.0026 (5/1936)	0.0013 (41/31285)	0.0776806	1	5	LILRA5/LILRB2/LILRA6/LILRB4/OSCAR
MF	GO:0030109	HLA-B specific inhibitory MHC class I receptor activity	0.0026 (5/1936)	0.0013 (41/31285)	0.0776806	1	5	LILRA5/LILRB2/LILRA6/LILRB4/OSCAR
MF	GO:0030107	HLA-A specific inhibitory MHC class I receptor activity	0.0026 (5/1936)	0.0013 (41/31285)	0.0776806	1	5	LILRA5/LILRB2/LILRA6/LILRB4/OSCAR
MF	GO:0030293	transmembrane receptor protein tyrosine kinase inhibitor activity	0.0026 (5/1936)	0.0013 (41/31285)	0.0776806	1	5	LILRA5/LILRB2/LILRA6/LILRB4/OSCAR
CC	GO:0098891	extrinsic component of presynaptic active zone membrane	0.0026 (5/1936)	0.0013 (41/31285)	0.0776806	1	5	gene:ENSG00000268400/SYTL1/transcript:ENST00000430834	SYTL2/SYTL5
MF	GO:0032396	inhibitory MHC class I receptor activity	0.0026 (5/1936)	0.0013 (41/31285)	0.0776806	1	5	LILRA5/LILRB2/LILRA6/LILRB4/OSCAR
MF	GO:0004722	protein serine/threonine phosphatase activity	0.0129 (25/1936)	0.0105 (330/31285)	0.0789694	1	25	transcript:ENST00000601358/LRRC2/SSH3/transcript:ENST00000478046/BTK/DNAJC7/PPM1D/transcript:ENST00000570380/HCK/transcript:ENST00000567530/DUSP1/MTMR1/MTMR10/SLA/PPP1R3F	ITK/BBS4/TMTC2/transcript:ENST00000532881/transcript:ENST00000455997/transcript:ENST00000588814/TTC12/transcript:ENST00000509031/transcript:ENST00000568004/transcript:ENST00000392995
BP	GO:0051490	negative regulation of filopodium assembly	0.0067 (13/1936)	0.0048 (150/31285)	0.0790611	1	13	C8orf44-SGK3/ARHGAP4/FCHO1/RASGRP3/ARHGAP30/transcript:ENST00000554738/ARHGAP40/transcript:ENST00000591662	transcript:ENST00000600677/transcript:ENST00000404127/NRXN3/transcript:ENST00000426421/RP11-47I22.4
BP	GO:2000110	negative regulation of macrophage apoptotic process	0.0067 (13/1936)	0.0048 (150/31285)	0.0790611	1	13	IRF8/CCR5/IRF9/GPR35/IRF7/IRF5/CCL8/transcript:ENST00000533182/CCL7/transcript:ENST00000539881/CCL3	transcript:ENST00000571451/ST8SIA1
MF	GO:1990715	mRNA CDS binding	0.0041 (8/1936)	0.0026 (80/31285)	0.0791738	1	8	RBM39/transcript:ENST00000502762/transcript:ENST00000401730/transcript:ENST00000514671	transcript:ENST00000338163/transcript:ENST00000388749/transcript:ENST00000601065/transcript:ENST00000630114
CC	GO:0030061	mitochondrial crista	0.0083 (16/1936)	0.0062 (194/31285)	0.0794871	1	16	SLA/PTPRO/MX2/transcript:ENST00000518116/BTK/HCK/MX1/transcript:ENST00000504594/NGF/CYP27B1	transcript:ENST00000479896/BCL2L2-PABPN1/transcript:ENST00000481416/transcript:ENST00000560014/ITK/FAM92A
BP	GO:0032693	negative regulation of interleukin-10 production	0.0088 (17/1936)	0.0067 (209/31285)	0.0799324	1	17	EBI3/SLA/LILRA5/TYROBP/transcript:ENST00000483665/SCARF1/LILRB2/SLAMF7/TRIB3/BTK/HCK/LILRB4/FCGR1A/LILRA6/OSCAR	FCGR2A/ITK
MF	GO:0035259	nuclear glucocorticoid receptor binding	0.0088 (17/1936)	0.0067 (209/31285)	0.0799324	1	17	NR4A1/transcript:ENST00000452281/NR1I3/FLI1/VDR/transcript:ENST00000495733/EHF/FLT1/CEBPD/ESR1/STAT1	transcript:ENST00000398654/transcript:ENST00000611848/transcript:ENST00000586337/ELF5/transcript:ENST00000573196/transcript:ENST00000504875
BP	GO:0010827	regulation of D-glucose transmembrane transport	0.0062 (12/1936)	0.0043 (136/31285)	0.0802902	1	12	C8orf44-SGK3/SLA/RASGRP3/OCLN/TRIB3/BTK/HCK/RPS6KA2/ROS1	RP11-47I22.4/SYTL5/ITK
BP	GO:1902035	positive regulation of hematopoietic stem cell proliferation	0.0031 (6/1936)	0.0017 (54/31285)	0.0806629	1	6	CXCL5/transcript:ENST00000545869/CXCL8/N4BP2/CXCL3/CXCL2
MF	GO:0120146	sulfatide binding	0.0031 (6/1936)	0.0017 (54/31285)	0.0806629	1	6	CD300C/transcript:ENST00000446668/transcript:ENST00000636866	RP11-315D16.2/transcript:ENST00000637871/transcript:ENST00000568422
CC	GO:0010005	cortical microtubule, transverse to long axis	0.0031 (6/1936)	0.0017 (54/31285)	0.0806629	1	6	CDKL3/CDK18	transcript:ENST00000453535/transcript:ENST00000555408/CDKL5/CDK15
BP	GO:2000255	negative regulation of male germ cell proliferation	0.0031 (6/1936)	0.0017 (54/31285)	0.0806629	1	6	transcript:ENST00000409403/GPR1/PTGDS/C5AR1/FPR3/CMKLR1
BP	GO:0045540	regulation of cholesterol biosynthetic process	0.0031 (6/1936)	0.0017 (54/31285)	0.0806629	1	6	transcript:ENST00000454552/transcript:ENST00000447878/TM7SF2/transcript:ENST00000441517/MBOAT7	PTCH1
CC	GO:0071682	endocytic vesicle lumen	0.0036 (7/1936)	0.0021 (67/31285)	0.0807169	1	7	CTSZ/C1S/CSF3/transcript:ENST00000534180/C1R/CTSH	transcript:ENST00000540297
MF	GO:0016798	hydrolase activity, acting on glycosyl bonds	0.0036 (7/1936)	0.0021 (67/31285)	0.0807169	1	7	SMPDL3B/transcript:ENST00000534405/PARP9	transcript:ENST00000465118/transcript:ENST00000531303/SMPD1/transcript:ENST00000533123
BP	GO:0045910	negative regulation of DNA recombination	0.0036 (7/1936)	0.0021 (67/31285)	0.0807169	1	7	transcript:ENST00000601091/transcript:ENST00000482936/transcript:ENST00000357464/transcript:ENST00000594759/transcript:ENST00000312087	transcript:ENST00000353275/RTEL1
BP	GO:0032914	positive regulation of transforming growth factor beta1 production	0.0046 (9/1936)	0.0030 (94/31285)	0.0808668	1	9	SERPINB2/FLRT1/ECM2/DCN/transcript:ENST00000635734/CCL8/UNC5B/CCL7/transcript:ENST00000636787
MF	GO:0009931	calcium-dependent protein serine/threonine kinase activity	0.0057 (11/1936)	0.0039 (122/31285)	0.0811241	1	11	transcript:ENST00000269361/transcript:ENST00000409403/transcript:ENST00000515231/CAMK1D/TRIB3/transcript:ENST00000417588/ERN1	transcript:ENST00000382240/DCLK1/RP1/transcript:ENST00000566631
BP	GO:0007089	traversing start control point of mitotic cell cycle	0.0057 (11/1936)	0.0039 (122/31285)	0.0811241	1	11	CDK18/CBS/RASGEF1B/CBSL/CCNO/RASGRF2	transcript:ENST00000555408/transcript:ENST00000510106/transcript:ENST00000566631/transcript:ENST00000413643/CDK15
CC	GO:0005797	Golgi medial cisterna	0.0108 (21/1936)	0.0086 (270/31285)	0.0818428	1	21	HLA-F/ULBP1/RP11-468E2.1/transcript:ENST00000429888/transcript:ENST00000472580/transcript:ENST00000558161/HLA-C/transcript:ENST00000560451/transcript:ENST00000464950/transcript:ENST00000431601/RAB33A/ENTPD1/transcript:ENST00000442798/transcript:ENST00000529332	transcript:ENST00000561419/transcript:ENST00000415933/transcript:ENST00000452389/transcript:ENST00000427274/transcript:ENST00000455997/ST8SIA1/YIPF1
BP	GO:0046697	decidualization	0.0124 (24/1936)	0.0101 (316/31285)	0.0819992	1	24	EBI3/NR1I3/VDR/CTSZ/PTGS2/ESR1/transcript:ENST00000496808/MSC/transcript:ENST00000445387/CYP27B1/GJD3/NR4A1/STC2/PLA2G4B/transcript:ENST00000413704/transcript:ENST00000522484/NEFM/CTSH/transcript:ENST00000593532	transcript:ENST00000334884/NDP/CDH18/PRLR/JMJD7-PLA2G4B
BP	GO:0009314	response to radiation	0.0083 (16/1936)	0.0062 (195/31285)	0.0823163	1	16	transcript:ENST00000593946/FLT1/transcript:ENST00000465003/TRIB3/PPM1D/transcript:ENST00000483148/C1QC/CCL8/transcript:ENST00000394606/CCL7/CCL3	transcript:ENST00000382240/transcript:ENST00000392995/BCL2L2-PABPN1/COL17A1/transcript:ENST00000504875
MF	GO:0005161	platelet-derived growth factor receptor binding	0.0093 (18/1936)	0.0072 (225/31285)	0.0827449	1	18	IL18R1/SLA/FLT1/PTPRO/transcript:ENST00000520579/gene:ENSG00000259753/BTK/HCK/PGF/IL1RL1/ERN1	transcript:ENST00000479896/SYNGAP1/transcript:ENST00000504875/ITGA10/transcript:ENST00000515800/transcript:ENST00000426902/ITK
BP	GO:0060159	regulation of dopamine receptor signaling pathway	0.0041 (8/1936)	0.0026 (81/31285)	0.0837624	1	8	LRRK1/FLI1/EHF/DBNDD2/ROS1	ELF5/RGS17/RGS4
BP	GO:0042554	superoxide anion generation	0.0041 (8/1936)	0.0026 (81/31285)	0.0837624	1	8	NCF4/ALOX5/ALOXE3/NCF1/PSTPIP1/PTGS2/transcript:ENST00000495564	EFCAB1
BP	GO:0035001	dorsal trunk growth, open tracheal system	0.0041 (8/1936)	0.0026 (81/31285)	0.0837624	1	8	SCARF1/gene:ENSG00000259753/transcript:ENST00000554738/transcript:ENST00000507218/NTNG2/transcript:ENST00000591662	NRXN3/ITGA10
BP	GO:0045670	regulation of osteoclast differentiation	0.0108 (21/1936)	0.0087 (271/31285)	0.0842642	1	21	ADAMTS14/TFEC/FLT1/TNF/CEBPD/ESR1/CAMK1D/CGB1/transcript:ENST00000507218/JUP/transcript:ENST00000529473/transcript:ENST00000515231/transcript:ENST00000424354	transcript:ENST00000419510/transcript:ENST00000503703/transcript:ENST00000526491/DCLK1/transcript:ENST00000468065/gene:ENSG00000258864/KLF17/transcript:ENST00000504875
MF	GO:0016765	transferase activity, transferring alkyl or aryl (other than methyl) groups	0.0026 (5/1936)	0.0013 (42/31285)	0.0843101	1	5	CBS/transcript:ENST00000454552/CTH/CBSL	transcript:ENST00000503915
BP	GO:0070434	positive regulation of nucleotide-binding oligomerization domain containing 2 signaling pathway	0.0026 (5/1936)	0.0013 (42/31285)	0.0843101	1	5	TLR2/TLR4/transcript:ENST00000541505/SLC15A3/transcript:ENST00000450272
BP	GO:1905627	regulation of serotonin biosynthetic process	0.0026 (5/1936)	0.0013 (42/31285)	0.0843101	1	5	FLI1/EHF/ALDH1A1	transcript:ENST00000548536/ELF5
MF	GO:0140900	chloride:bicarbonate antiporter activity	0.0026 (5/1936)	0.0013 (42/31285)	0.0843101	1	5	transcript:ENST00000425141	SLC26A7/SLC26A4/SLC4A4/SLC4A3
BP	GO:0060947	cardiac vascular smooth muscle cell differentiation	0.0026 (5/1936)	0.0013 (42/31285)	0.0843101	1	5	JUP/MSC/FLT1/transcript:ENST00000520579	transcript:ENST00000504875
BP	GO:0099526	presynapse to nucleus signaling pathway	0.0026 (5/1936)	0.0013 (42/31285)	0.0843101	1	5	SYTL1/SYT7/DYSF	SYTL2/SYTL5
BP	GO:0072200	negative regulation of mesenchymal cell proliferation involved in ureter development	0.0021 (4/1936)	0.0010 (30/31285)	0.0847155	1	4	GDF15/INHBE/BMP6/INHBA
BP	GO:0055020	positive regulation of cardiac muscle fiber development	0.0021 (4/1936)	0.0010 (30/31285)	0.0847155	1	4	GDF15/INHBE/BMP6/INHBA
BP	GO:0002572	pro-T cell differentiation	0.0021 (4/1936)	0.0010 (30/31285)	0.0847155	1	4	EHF/FLT1	ELF5/transcript:ENST00000504875
BP	GO:0032690	negative regulation of interleukin-1 alpha production	0.0021 (4/1936)	0.0010 (30/31285)	0.0847155	1	4	CCL8/CCL7/IL18R1/IL1RL1
BP	GO:0048392	intermediate mesodermal cell differentiation	0.0021 (4/1936)	0.0010 (30/31285)	0.0847155	1	4	GDF15/INHBE/BMP6/INHBA
BP	GO:0010893	positive regulation of steroid biosynthetic process	0.0021 (4/1936)	0.0010 (30/31285)	0.0847155	1	4	CGB1/IL1A	ADORA2A/transcript:ENST00000478631
BP	GO:2000007	negative regulation of metanephric comma-shaped body morphogenesis	0.0021 (4/1936)	0.0010 (30/31285)	0.0847155	1	4	GDF15/INHBE/BMP6/INHBA
BP	GO:2000005	negative regulation of metanephric S-shaped body morphogenesis	0.0021 (4/1936)	0.0010 (30/31285)	0.0847155	1	4	GDF15/INHBE/BMP6/INHBA
BP	GO:0051042	negative regulation of calcium-independent cell-cell adhesion	0.0021 (4/1936)	0.0010 (30/31285)	0.0847155	1	4	GDF15/INHBE/BMP6/INHBA
MF	GO:0016780	phosphotransferase activity, for other substituted phosphate groups	0.0021 (4/1936)	0.0010 (30/31285)	0.0847155	1	4	transcript:ENST00000506402	transcript:ENST00000420164/transcript:ENST00000337004/transcript:ENST00000504187
BP	GO:0006543	glutamine catabolic process	0.0021 (4/1936)	0.0010 (30/31285)	0.0847155	1	4	transcript:ENST00000495242/ARHGAP4	transcript:ENST00000417154/GLS
BP	GO:1900155	negative regulation of bone trabecula formation	0.0046 (9/1936)	0.0030 (95/31285)	0.0851239	1	9	FLRT1/MINOS1-NBL1/NR1I3/VDR/DCN/transcript:ENST00000593532/CYP27B1	LRRTM4/LRRC4
BP	GO:0045606	positive regulation of epidermal cell differentiation	0.0046 (9/1936)	0.0030 (95/31285)	0.0851239	1	9	transcript:ENST00000375290/IL24/INHBE/GDF15/BMP6/transcript:ENST00000522484/INHBA/transcript:ENST00000569544	PTCH1
BP	GO:1902624	positive regulation of neutrophil migration	0.0046 (9/1936)	0.0030 (95/31285)	0.0851239	1	9	IL1A/TLR2/TLR4/MYO15B/SELENOK/PSTPIP1/MYO1G/MYO1F	transcript:ENST00000488746
MF	GO:0033592	RNA strand annealing activity	0.0046 (9/1936)	0.0030 (95/31285)	0.0851239	1	9	transcript:ENST00000550704/transcript:ENST00000502762/DDX47/DDX3Y/DHX58/transcript:ENST00000514671	transcript:ENST00000338163/RP11-762I7.5/transcript:ENST00000630114
MF	GO:0016853	isomerase activity	0.0088 (17/1936)	0.0067 (211/31285)	0.0854505	1	17	C2/ALOX5/transcript:ENST00000526129/transcript:ENST00000583858/CYP1A1/ALOXE3/PTGS2/transcript:ENST00000357464/IFIH1/transcript:ENST00000481262/DHX58/DDX60	ACADVL/transcript:ENST00000564136/transcript:ENST00000473015/transcript:ENST00000584453/ECI2
BP	GO:0099525	presynaptic dense core vesicle exocytosis	0.0067 (13/1936)	0.0049 (152/31285)	0.0856229	1	13	gene:ENSG00000268400/RASGRP3/RAB33A/SYTL1/MX2/SYT7/PLA2G4B/transcript:ENST00000311943/UNC13D/MX1	JMJD7-PLA2G4B/SYTL2/SYTL5
BP	GO:0032730	positive regulation of interleukin-1 alpha production	0.0067 (13/1936)	0.0049 (152/31285)	0.0856229	1	13	CARD16/CCL7/P2RX7/transcript:ENST00000435201/LMO1/CALCB/CCL8/IAPP/transcript:ENST00000558656/transcript:ENST00000539881/CCL20/CCL3	transcript:ENST00000571451
MF	GO:0061133	endopeptidase activator activity	0.0036 (7/1936)	0.0022 (68/31285)	0.0858565	1	7	transcript:ENST00000543428/transcript:ENST00000583147/NLRC4/transcript:ENST00000522484/transcript:ENST00000560370	transcript:ENST00000620309/transcript:ENST00000539560
BP	GO:0003289	atrial septum primum morphogenesis	0.0036 (7/1936)	0.0022 (68/31285)	0.0858565	1	7	GDF15/transcript:ENST00000445387/transcript:ENST00000312087	transcript:ENST00000353275/transcript:ENST00000431180/KMT2C/SOX7
BP	GO:0019100	male germ-line sex determination	0.0036 (7/1936)	0.0022 (68/31285)	0.0858565	1	7	transcript:ENST00000443120/STAT1/transcript:ENST00000374754	transcript:ENST00000382240/transcript:ENST00000490904/transcript:ENST00000544041/SOX7
BP	GO:0044344	cellular response to fibroblast growth factor stimulus	0.0196 (38/1936)	0.0172 (538/31285)	0.0860162	1	38	SCARF1/FLT1/transcript:ENST00000534320/ESR1/LMO1/CXCL3/ROS1/transcript:ENST00000558656/CCL3/transcript:ENST00000558084/ECM2/MSC/IQGAP2/RUNX3/PGF/CCL8/CYP27B1/NR4A1/JUP/transcript:ENST00000520579/HELZ2/CXCL5/transcript:ENST00000522484/CXCL2/transcript:ENST00000394606/CCL7/NEFM/DOK3/C1QA/CXCL8/transcript:ENST00000435201/COL9A2	transcript:ENST00000515800/SYNGAP1/transcript:ENST00000633485/COL17A1/transcript:ENST00000507018/transcript:ENST00000504875
BP	GO:0046599	regulation of centriole replication	0.0031 (6/1936)	0.0018 (55/31285)	0.08647	1	6	transcript:ENST00000423048/AURKC/transcript:ENST00000616467/ERN1	transcript:ENST00000482010/C10orf90
BP	GO:0060101	negative regulation of phagocytosis, engulfment	0.0031 (6/1936)	0.0018 (55/31285)	0.08647	1	6	CD300C/ATP8B3/ATP11A/SIGLEC1	CD300LB/ATP8A1
BP	GO:0034551	mitochondrial respiratory chain complex III assembly	0.0031 (6/1936)	0.0018 (55/31285)	0.08647	1	6	TTC19/transcript:ENST00000549960/RP11-73M18.2/transcript:ENST00000521036	transcript:ENST00000457259/transcript:ENST00000475723
BP	GO:0009449	gamma-aminobutyric acid biosynthetic process	0.0031 (6/1936)	0.0018 (55/31285)	0.08647	1	6	GAD1/SLC1A4/ALDH1A1	SLC38A6/SLC38A4/transcript:ENST00000493875
BP	GO:0019344	cysteine biosynthetic process	0.0031 (6/1936)	0.0018 (55/31285)	0.08647	1	6	CBS/SDS/CTH/transcript:ENST00000361660/CBSL/RP11-385D13.1
BP	GO:0050826	response to freezing	0.0031 (6/1936)	0.0018 (55/31285)	0.08647	1	6	transcript:ENST00000496241/transcript:ENST00000574951/transcript:ENST00000496808	transcript:ENST00000453535/transcript:ENST00000573196/transcript:ENST00000466227
BP	GO:0044879	mitotic morphogenesis checkpoint signaling	0.0031 (6/1936)	0.0018 (55/31285)	0.08647	1	6	BRSK2/transcript:ENST00000626154/TRIB3/ARHGAP9/ARHGAP40	transcript:ENST00000382240
BP	GO:0010033	obsolete response to organic substance	0.0511 (99/1936)	0.0493 (1541/31285)	0.0865547	1	99	CTSZ/CH25H/C1R/transcript:ENST00000591662/transcript:ENST00000478046/BTK/transcript:ENST00000554738/CYP27B1/ERN1/MMP12/ATF3/IL1A/MERTK/transcript:ENST00000593532/C1QB/EBI3/VDR/PTGS2/TNFAIP6/TRPA1/SSH3/transcript:ENST00000569857/transcript:ENST00000452281/HCK/DUSP1/SRD5A2/transcript:ENST00000543984/transcript:ENST00000567118/C1QA/transcript:ENST00000556575/transcript:ENST00000585841/transcript:ENS…	CDK15/transcript:ENST00000532881/RP11-47I22.4/transcript:ENST00000460404/JMJD7-PLA2G4B/transcript:ENST00000398654/CD6/transcript:ENST00000472940/CSRP3/ITK/transcript:ENST00000424203/transcript:ENST00000461221/KCNA7/transcript:ENST00000560014/transcript:ENST00000382240/transcript:ENST00000636494/SOX7/ACPP/transcript:ENST00000531547/NRXN3/transcript:ENST00000592705/RPL36A-HNRNPH2/CDKL5/transcript:E…
BP	GO:0046321	positive regulation of fatty acid oxidation	0.0072 (14/1936)	0.0053 (167/31285)	0.0869112	1	14	NR4A1/KLHL6/NR1I3/VDR/KBTBD12/BRSK2/transcript:ENST00000593532/transcript:ENST00000626154/C1QA/C1QB/C1QC/transcript:ENST00000395594/transcript:ENST00000507218	KLHL7
CC	GO:0071004	U2-type prespliceosome	0.0072 (14/1936)	0.0053 (167/31285)	0.0869112	1	14	transcript:ENST00000507392/ZRSR1/transcript:ENST00000401730/transcript:ENST00000600289/gene:ENSG00000255663/transcript:ENST00000475126	transcript:ENST00000577940/transcript:ENST00000456182/transcript:ENST00000424478/transcript:ENST00000439775/LSM4/transcript:ENST00000601065/transcript:ENST00000426094/transcript:ENST00000542140
BP	GO:1904042	negative regulation of cystathionine beta-synthase activity	0.0010 (2/1936)	0.0003 (9/31285)	0.0869969	1	2	transcript:ENST00000511461/transcript:ENST00000513439
BP	GO:0014741	negative regulation of muscle hypertrophy	0.0010 (2/1936)	0.0003 (9/31285)	0.0869969	1	2	INHBE/INHBA
MF	GO:0042131	thiamine phosphate phosphatase activity	0.0010 (2/1936)	0.0003 (9/31285)	0.0869969	1	2		ACPP/transcript:ENST00000531547
MF	GO:0050583	hydrogen dehydrogenase (NADP+) activity	0.0010 (2/1936)	0.0003 (9/31285)	0.0869969	1	2	transcript:ENST00000374611	transcript:ENST00000582907
BP	GO:0044827	modulation by host of viral genome replication	0.0010 (2/1936)	0.0003 (9/31285)	0.0869969	1	2	IFI27/IFI6
MF	GO:0003909	DNA ligase activity	0.0010 (2/1936)	0.0003 (9/31285)	0.0869969	1	2	transcript:ENST00000601091/transcript:ENST00000594759
MF	GO:0000298	endopolyphosphatase activity	0.0010 (2/1936)	0.0003 (9/31285)	0.0869969	1	2	SMPDL3B	SMPD1
BP	GO:0019289	rhizobactin 1021 biosynthetic process	0.0010 (2/1936)	0.0003 (9/31285)	0.0869969	1	2	GAD1	transcript:ENST00000493875
MF	GO:0036469	L-tryptophan decarboxylase activity	0.0010 (2/1936)	0.0003 (9/31285)	0.0869969	1	2	GAD1	transcript:ENST00000493875
BP	GO:0050942	positive regulation of pigment cell differentiation	0.0010 (2/1936)	0.0003 (9/31285)	0.0869969	1	2		transcript:ENST00000567523/transcript:ENST00000244777
MF	GO:0015647	peptidoglycan transmembrane transporter activity	0.0010 (2/1936)	0.0003 (9/31285)	0.0869969	1	2	transcript:ENST00000541505/SLC15A3
BP	GO:1901074	regulation of engulfment of apoptotic cell	0.0010 (2/1936)	0.0003 (9/31285)	0.0869969	1	2	ALOXE3/ALOX5
MF	GO:0004572	mannosyl-oligosaccharide 1,3-1,6-alpha-mannosidase activity	0.0010 (2/1936)	0.0003 (9/31285)	0.0869969	1	2	transcript:ENST00000558161/transcript:ENST00000560451
MF	GO:0004837	tyrosine decarboxylase activity	0.0010 (2/1936)	0.0003 (9/31285)	0.0869969	1	2	GAD1	transcript:ENST00000493875
MF	GO:0036467	5-hydroxy-L-tryptophan decarboxylase activity	0.0010 (2/1936)	0.0003 (9/31285)	0.0869969	1	2	GAD1	transcript:ENST00000493875
BP	GO:0015835	peptidoglycan transport	0.0010 (2/1936)	0.0003 (9/31285)	0.0869969	1	2	transcript:ENST00000541505/SLC15A3
BP	GO:0015851	nucleobase transport	0.0010 (2/1936)	0.0003 (9/31285)	0.0869969	1	2	transcript:ENST00000540386	SLC29A2
BP	GO:0042704	uterine wall breakdown	0.0010 (2/1936)	0.0003 (9/31285)	0.0869969	1	2	GDF15/INHBA
BP	GO:0140159	borate export across plasma membrane	0.0010 (2/1936)	0.0003 (9/31285)	0.0869969	1	2		SLC4A4/SLC4A3
BP	GO:0042938	dipeptide transport	0.0010 (2/1936)	0.0003 (9/31285)	0.0869969	1	2	transcript:ENST00000541505/SLC15A3
MF	GO:0046525	xylosylprotein 4-beta-galactosyltransferase activity	0.0010 (2/1936)	0.0003 (9/31285)	0.0869969	1	2	transcript:ENST00000505433	transcript:ENST00000480814
MF	GO:0015205	nucleobase transmembrane transporter activity	0.0010 (2/1936)	0.0003 (9/31285)	0.0869969	1	2	transcript:ENST00000540386	SLC29A2
MF	GO:0015210	uracil transmembrane transporter activity	0.0010 (2/1936)	0.0003 (9/31285)	0.0869969	1	2	transcript:ENST00000540386	SLC29A2
MF	GO:0052795	obsolete exo-alpha-(2->6)-sialidase activity	0.0010 (2/1936)	0.0003 (9/31285)	0.0869969	1	2	transcript:ENST00000491768/NEU4
MF	GO:0052796	obsolete exo-alpha-(2->8)-sialidase activity	0.0010 (2/1936)	0.0003 (9/31285)	0.0869969	1	2	transcript:ENST00000491768/NEU4
BP	GO:0035608	protein deglutamylation	0.0010 (2/1936)	0.0003 (9/31285)	0.0869969	1	2	transcript:ENST00000487078	AGBL5
BP	GO:1904902	ESCRT III complex assembly	0.0010 (2/1936)	0.0003 (9/31285)	0.0869969	1	2	RP11-468E2.1/transcript:ENST00000533523
BP	GO:0035611	protein branching point deglutamylation	0.0010 (2/1936)	0.0003 (9/31285)	0.0869969	1	2	transcript:ENST00000487078	AGBL5
MF	GO:0008160	protein tyrosine phosphatase activator activity	0.0010 (2/1936)	0.0003 (9/31285)	0.0869969	1	2	IGFBP3/IGFBP1
BP	GO:1905053	positive regulation of base-excision repair	0.0010 (2/1936)	0.0003 (9/31285)	0.0869969	1	2		transcript:ENST00000530721/transcript:ENST00000530170
BP	GO:1900457	regulation of brassinosteroid mediated signaling pathway	0.0010 (2/1936)	0.0003 (9/31285)	0.0869969	1	2		transcript:ENST00000487292/JMJD7-PLA2G4B
BP	GO:2000296	negative regulation of hydrogen peroxide catabolic process	0.0010 (2/1936)	0.0003 (9/31285)	0.0869969	1	2	C1R/C1S
BP	GO:0001959	regulation of cytokine-mediated signaling pathway	0.0010 (2/1936)	0.0003 (9/31285)	0.0869969	1	2	IRAK3/transcript:ENST00000369973
BP	GO:1903060	negative regulation of protein lipidation	0.0010 (2/1936)	0.0003 (9/31285)	0.0869969	1	2	transcript:ENST00000496241	ECI2
BP	GO:0048281	inflorescence morphogenesis	0.0010 (2/1936)	0.0003 (9/31285)	0.0869969	1	2	IRAK3	transcript:ENST00000568004
BP	GO:0060862	negative regulation of floral organ abscission	0.0010 (2/1936)	0.0003 (9/31285)	0.0869969	1	2	IRAK3	BORCS8-MEF2B
MF	GO:0102566	obsolete 1-acyl dihydroxyacetone phosphate reductase activity	0.0010 (2/1936)	0.0003 (9/31285)	0.0869969	1	2		DHRS9/RDH5
BP	GO:0033140	negative regulation of peptidyl-serine phosphorylation of STAT protein	0.0010 (2/1936)	0.0003 (9/31285)	0.0869969	1	2	GADD45B/GADD45A
BP	GO:0045990	carbon catabolite regulation of transcription	0.0010 (2/1936)	0.0003 (9/31285)	0.0869969	1	2	transcript:ENST00000394606/transcript:ENST00000424354
MF	GO:0052794	obsolete exo-alpha-(2->3)-sialidase activity	0.0010 (2/1936)	0.0003 (9/31285)	0.0869969	1	2	transcript:ENST00000491768/NEU4
BP	GO:1905453	regulation of myeloid progenitor cell differentiation	0.0010 (2/1936)	0.0003 (9/31285)	0.0869969	1	2	EHF	ELF5
BP	GO:1901862	negative regulation of muscle tissue development	0.0010 (2/1936)	0.0003 (9/31285)	0.0869969	1	2	IGFBP3/IGFBP1
MF	GO:0141055	histone H3 ubiquitin ligase activity	0.0010 (2/1936)	0.0003 (9/31285)	0.0869969	1	2	transcript:ENST00000534320	transcript:ENST00000468435
CC	GO:0032807	DNA ligase IV complex	0.0010 (2/1936)	0.0003 (9/31285)	0.0869969	1	2	transcript:ENST00000601091/transcript:ENST00000594759
BP	GO:0070164	negative regulation of adiponectin secretion	0.0010 (2/1936)	0.0003 (9/31285)	0.0869969	1	2	IL1RN/IL1B
BP	GO:1904886	beta-catenin destruction complex disassembly	0.0010 (2/1936)	0.0003 (9/31285)	0.0869969	1	2	FRAT2	transcript:ENST00000453535
BP	GO:0080005	photosystem stoichiometry adjustment	0.0010 (2/1936)	0.0003 (9/31285)	0.0869969	1	2	PPM1D	transcript:ENST00000392995
BP	GO:0046359	butyrate catabolic process	0.0015 (3/1936)	0.0006 (19/31285)	0.087216	1	3	transcript:ENST00000481262/transcript:ENST00000583858	ACADVL
MF	GO:0042497	triacyl lipopeptide binding	0.0015 (3/1936)	0.0006 (19/31285)	0.087216	1	3	IL18R1/TLR4/TLR2
BP	GO:0002765	immune response-inhibiting signal transduction	0.0015 (3/1936)	0.0006 (19/31285)	0.087216	1	3	IL20RB/transcript:ENST00000469964/transcript:ENST00000475972
BP	GO:0035793	positive regulation of metanephric mesenchymal cell migration by platelet-derived growth factor receptor-beta signaling pathway	0.0015 (3/1936)	0.0006 (19/31285)	0.087216	1	3	transcript:ENST00000520579/FLT1	transcript:ENST00000504875
MF	GO:0180009	broad specificity neutral L-amino acid:basic L-amino acid antiporter activity	0.0015 (3/1936)	0.0006 (19/31285)	0.087216	1	3	SLC7A7/SLC7A11/SLC7A5
MF	GO:0004085	obsolete butyryl-CoA dehydrogenase activity	0.0015 (3/1936)	0.0006 (19/31285)	0.087216	1	3	transcript:ENST00000481262/transcript:ENST00000583858	ACADVL
BP	GO:1904401	cellular response to Thyroid stimulating hormone	0.0015 (3/1936)	0.0006 (19/31285)	0.087216	1	3	transcript:ENST00000549098/transcript:ENST00000547173	transcript:ENST00000547475
BP	GO:2000635	negative regulation of primary miRNA processing	0.0015 (3/1936)	0.0006 (19/31285)	0.087216	1	3	transcript:ENST00000452281/STAT1/IL6
BP	GO:0071670	smooth muscle cell chemotaxis	0.0015 (3/1936)	0.0006 (19/31285)	0.087216	1	3	transcript:ENST00000520579/FLT1	transcript:ENST00000504875
BP	GO:0034650	cortisol metabolic process	0.0015 (3/1936)	0.0006 (19/31285)	0.087216	1	3	CYP27B1	DHRS9/RDH5
BP	GO:1904390	cone retinal bipolar cell differentiation	0.0015 (3/1936)	0.0006 (19/31285)	0.087216	1	3	GNAL/GNA15	NDP
CC	GO:0031380	nuclear RNA-directed RNA polymerase complex	0.0015 (3/1936)	0.0006 (19/31285)	0.087216	1	3	transcript:ENST00000357464/transcript:ENST00000496634/HELZ2
BP	GO:0003261	cardiac muscle progenitor cell migration to the midline involved in heart field formation	0.0015 (3/1936)	0.0006 (19/31285)	0.087216	1	3	transcript:ENST00000520579/FLT1	transcript:ENST00000504875
CC	GO:0008231	repressor ecdysone receptor complex	0.0015 (3/1936)	0.0006 (19/31285)	0.087216	1	3	transcript:ENST00000593532/NR1I3/VDR
BP	GO:0003317	cardioblast cell midline fusion	0.0015 (3/1936)	0.0006 (19/31285)	0.087216	1	3	transcript:ENST00000520579/FLT1	transcript:ENST00000504875
BP	GO:1900438	negative regulation of filamentous growth of a population of unicellular organisms in response to chemical stimulus	0.0015 (3/1936)	0.0006 (19/31285)	0.087216	1	3	C8orf44-SGK3/RPS6KA2/transcript:ENST00000556575
MF	GO:1990955	G-rich single-stranded DNA binding	0.0015 (3/1936)	0.0006 (19/31285)	0.087216	1	3	transcript:ENST00000609106/transcript:ENST00000607932/HELZ2
MF	GO:0005018	platelet-derived growth factor alpha-receptor activity	0.0015 (3/1936)	0.0006 (19/31285)	0.087216	1	3	transcript:ENST00000520579/FLT1	transcript:ENST00000504875
BP	GO:0006189	'de novo' IMP biosynthetic process	0.0015 (3/1936)	0.0006 (19/31285)	0.087216	1	3	transcript:ENST00000623287/transcript:ENST00000580356	transcript:ENST00000424203
BP	GO:0039654	fusion of virus membrane with host endosome membrane	0.0015 (3/1936)	0.0006 (19/31285)	0.087216	1	3	CTSH/CTSZ	RP11-762I7.5
BP	GO:0061864	basement membrane constituent secretion	0.0015 (3/1936)	0.0006 (19/31285)	0.087216	1	3	DENND2D	DENND2A/transcript:ENST00000294737
MF	GO:0140612	DNA damage sensor activity	0.0015 (3/1936)	0.0006 (19/31285)	0.087216	1	3	transcript:ENST00000534320	transcript:ENST00000476581/transcript:ENST00000468435
BP	GO:1904715	negative regulation of chaperone-mediated autophagy	0.0015 (3/1936)	0.0006 (19/31285)	0.087216	1	3	transcript:ENST00000475126/transcript:ENST00000401730	transcript:ENST00000601065
MF	GO:0140713	histone chaperone activity	0.0062 (12/1936)	0.0044 (138/31285)	0.0872927	1	12	transcript:ENST00000550704/transcript:ENST00000558357/ATF3/transcript:ENST00000502762/transcript:ENST00000625662/RBM39/transcript:ENST00000616321/transcript:ENST00000437362/transcript:ENST00000514671	BCL2L2-PABPN1/transcript:ENST00000338163/transcript:ENST00000630114
BP	GO:0032825	positive regulation of natural killer cell differentiation	0.0062 (12/1936)	0.0044 (138/31285)	0.0872927	1	12	transcript:ENST00000452281/RASGRP3/IRF9/MERTK/IRF7/STAT1/IRF5/ROS1/transcript:ENST00000533182/IRF8/transcript:ENST00000507218	transcript:ENST00000503703
BP	GO:0006974	DNA damage response	0.0894 (173/1936)	0.0893 (2795/31285)	0.0880571	1	173	FCER1G/CBS/TREX1/transcript:ENST00000534320/TRIB3/RP11-385D13.1/transcript:ENST00000496808/transcript:ENST00000448461/GADD45A/transcript:ENST00000495733/FMNL3/BTK/REC8/IRF8/ERN1/transcript:ENST00000518360/BRSK2/ZNF775/ATF3/transcript:ENST00000626154/HIST2H3C/ZNF641/transcript:ENST00000621474/SLC1A4/IRF9/MERTK/transcript:ENST00000521548/DTX4/HIST2H3A/transcript:ENST00000482936/transcript:ENST00000…	transcript:ENST00000419510/transcript:ENST00000441123/transcript:ENST00000307849/CDK15/KIAA1524/transcript:ENST00000510815/transcript:ENST00000599177/NOSTRIN/RP11-47I22.4/transcript:ENST00000468435/transcript:ENST00000535558/transcript:ENST00000415933/C14orf105/DDB2/transcript:ENST00000554308/transcript:ENST00000522610/transcript:ENST00000229866/transcript:ENST00000601065/transcript:ENST000003597…
BP	GO:0030889	negative regulation of B cell proliferation	0.0083 (16/1936)	0.0063 (197/31285)	0.0881681	1	16	SLA/TYROBP/CD300C/transcript:ENST00000483665/RAP1GAP/BTK/HCK/INPP5J/MNDA/FCGR1A/transcript:ENST00000498479	CD300LB/FCGR2A/RP11-47I22.4/transcript:ENST00000515800/ITK
BP	GO:0030101	natural killer cell activation	0.0088 (17/1936)	0.0068 (212/31285)	0.0882997	1	17	IL18R1/EBI3/LILRA5/transcript:ENST00000483665/RASGRP3/LILRB2/SLAMF7/CLEC12A/LILRB4/IL12A/IL1RL1/transcript:ENST00000325960/FCGR1A/ULBP1/LILRA6/OSCAR	FCGR2A
MF	GO:0001791	IgM binding	0.0041 (8/1936)	0.0026 (82/31285)	0.0885041	1	8	LILRA5/CD300C/LILRB2/LILRB4/SIGLEC1/LILRA6/OSCAR	CD300LB
BP	GO:0048496	maintenance of animal organ identity	0.0041 (8/1936)	0.0026 (82/31285)	0.0885041	1	8	SCARF1/RP11-73M18.2/CTNND2/transcript:ENST00000554738/NTNG2/SDK2	NRXN3/transcript:ENST00000393650
BP	GO:0048481	plant ovule development	0.0041 (8/1936)	0.0026 (82/31285)	0.0885041	1	8	LRRC2/transcript:ENST00000445387/transcript:ENST00000496808/IRAK3	transcript:ENST00000453535/transcript:ENST00000431180/transcript:ENST00000568004/BORCS8-MEF2B
MF	GO:0008324	monoatomic cation transmembrane transporter activity	0.0046 (9/1936)	0.0031 (96/31285)	0.0895124	1	9	TRPM2/transcript:ENST00000525723/transcript:ENST00000540386	SLC29A2/transcript:ENST00000566598/SLC38A6/TRPV3/SLC38A4/transcript:ENST00000454324
BP	GO:0010829	negative regulation of D-glucose transmembrane transport	0.0046 (9/1936)	0.0031 (96/31285)	0.0895124	1	9	IL1RN/C8orf44-SGK3/FABP4/RASGRP3/INPP5J/RPS6KA2/IL1B	RP11-47I22.4/SYTL5
BP	GO:0035426	extracellular matrix-cell signaling	0.0046 (9/1936)	0.0031 (96/31285)	0.0895124	1	9	LRRK1/transcript:ENST00000538239/DGCR2/SH2D3C/BTK/transcript:ENST00000522484/ROS1	NDP/ITK
CC	GO:0005777	peroxisome	0.0387 (75/1936)	0.0366 (1144/31285)	0.0896098	1	75	transcript:ENST00000442122/CBS/MX2/CES3/HRASLS/DDX3Y/GPX3/transcript:ENST00000475126/CES1/transcript:ENST00000618193/LRRK1/SYTL1/transcript:ENST00000478046/SYT7/RARRES3/CAMK1D/transcript:ENST00000429888/IL4I1/SLC22A14/KCNIP2/transcript:ENST00000472580/transcript:ENST00000486165/transcript:ENST00000616321/IRAK3/USP18/transcript:ENST00000612061/transcript:ENST00000518360/KRT75/PLA2G4B/CTH/CBSL/tran…	transcript:ENST00000565875/transcript:ENST00000422591/transcript:ENST00000590558/transcript:ENST00000530170/transcript:ENST00000522791/SYTL5/transcript:ENST00000530721/transcript:ENST00000546891/transcript:ENST00000478361/transcript:ENST00000630114/transcript:ENST00000482958/transcript:ENST00000527688/CLIC2/transcript:ENST00000474897/transcript:ENST00000478631/ECI2/transcript:ENST00000553486/tran…
BP	GO:0032496	response to lipopolysaccharide	0.0764 (148/1936)	0.0758 (2372/31285)	0.0903446	1	148	transcript:ENST00000442122/CARD16/TRIB3/transcript:ENST00000496808/C1R/CXCL3/UNC5B/SERPINB2/ECM2/LRRK1/BTK/SIGLEC1/IGFBP3/CCL8/FPR3/IRF8/CYP27B1/IL1RN/TLR4/MMP12/GPR35/ATF3/PTGES/IL10RA/transcript:ENST00000539881/LGALS9/IL1A/IRF9/transcript:ENST00000593532/transcript:ENST00000502762/C5AR1/IL4I1/transcript:ENST00000514671/transcript:ENST00000538239/NR1I3/VDR/PTGS2/CDIP1/LRRC2/SSH3/CCR5/CSF2RB/LILR…	transcript:ENST00000483292/transcript:ENST00000532881/transcript:ENST00000482958/RP11-47I22.4/transcript:ENST00000611848/JMJD7-PLA2G4B/CD6/transcript:ENST00000472940/ITK/transcript:ENST00000382240/transcript:ENST00000485036/PALMD/CSMD3/transcript:ENST00000559133/DCLK1/transcript:ENST00000592705/transcript:ENST00000548536/transcript:ENST00000630114/transcript:ENST00000571451/BCL2L2-PABPN1/COL17A1/…
BP	GO:0030224	monocyte differentiation	0.0098 (19/1936)	0.0078 (243/31285)	0.090558	1	19	CSF2/VDR/FLT1/transcript:ENST00000577831/MNDA/PGF/INHBA/GDF15/BMP6/INHBE/transcript:ENST00000593532	PDE3A/BORCS8-MEF2B/PRLR/LEPR/KLF17/PDE11A/transcript:ENST00000561038/transcript:ENST00000504875
BP	GO:0036098	male germ-line stem cell population maintenance	0.0062 (12/1936)	0.0044 (139/31285)	0.0909313	1	12	transcript:ENST00000269361/INHBE/transcript:ENST00000558357/transcript:ENST00000558084/GDF15/BMP6/transcript:ENST00000534320/transcript:ENST00000482936/DDX3Y/TUBA8	transcript:ENST00000510866/RTEL1
BP	GO:0071729	beak morphogenesis	0.0036 (7/1936)	0.0022 (69/31285)	0.0911781	1	7	NR4A1/INHBE/NR1I3/VDR/GDF15/BMP6/INHBA
BP	GO:0090119	vesicle-mediated cholesterol transport	0.0036 (7/1936)	0.0022 (69/31285)	0.0911781	1	7	SYTL1/SYT7/PLA2G4B/UNC13D	JMJD7-PLA2G4B/SYTL2/SYTL5
BP	GO:0042306	regulation of protein import into nucleus	0.0036 (7/1936)	0.0022 (69/31285)	0.0911781	1	7	INHBE/GDF15/BMP6/INHBA	transcript:ENST00000453535/transcript:ENST00000603946/transcript:ENST00000512151
BP	GO:0007352	zygotic specification of dorsal/ventral axis	0.0026 (5/1936)	0.0014 (43/31285)	0.0912273	1	5	INHBE/GDF15/BMP6/IRAK3	transcript:ENST00000611848
BP	GO:1901647	positive regulation of synoviocyte proliferation	0.0026 (5/1936)	0.0014 (43/31285)	0.0912273	1	5	SLA/TNF/BTK/HCK	ITK
MF	GO:0051033	RNA transmembrane transporter activity	0.0026 (5/1936)	0.0014 (43/31285)	0.0912273	1	5	transcript:ENST00000502762/RBM39/transcript:ENST00000514671	transcript:ENST00000338163/transcript:ENST00000630114
BP	GO:0035999	tetrahydrofolate interconversion	0.0026 (5/1936)	0.0014 (43/31285)	0.0912273	1	5	transcript:ENST00000557348/transcript:ENST00000553837/transcript:ENST00000557433/transcript:ENST00000555563	transcript:ENST00000556825
BP	GO:0070973	protein localization to endoplasmic reticulum exit site	0.0026 (5/1936)	0.0014 (43/31285)	0.0912273	1	5	LRRK1/RP11-407N17.3/SEC16B	MIA2/transcript:ENST00000528461
BP	GO:0022615	protein to membrane docking	0.0026 (5/1936)	0.0014 (43/31285)	0.0912273	1	5	gene:ENSG00000268400/SNX10	transcript:ENST00000474897/transcript:ENST00000436958/transcript:ENST00000368979
BP	GO:0001573	ganglioside metabolic process	0.0026 (5/1936)	0.0014 (43/31285)	0.0912273	1	5	ABCA5/ABCA10/gene:ENSG00000259753	RP11-315D16.2/transcript:ENST00000586995
BP	GO:0038156	interleukin-3-mediated signaling pathway	0.0026 (5/1936)	0.0014 (43/31285)	0.0912273	1	5	FCER1G/transcript:ENST00000452281/CSF2RB/STAT1	transcript:ENST00000515800
MF	GO:0009055	electron transfer activity	0.0108 (21/1936)	0.0088 (274/31285)	0.0918102	1	21	transcript:ENST00000361660/GPX3/gene:ENSG00000267059/NCF4/transcript:ENST00000583858/transcript:ENST00000495564/SRD5A2/CYP1A1/ALDH1A1/transcript:ENST00000474308/PSTPIP1/NCF1/transcript:ENST00000513439/transcript:ENST00000481262/IL4I1	ACADVL/transcript:ENST00000527688/SCD/transcript:ENST00000548536/DHRS9/RDH5
BP	GO:0002376	immune system process	0.0165 (32/1936)	0.0143 (446/31285)	0.0923781	1	32	FLI1/CD163/transcript:ENST00000483665/IRF7/transcript:ENST00000588198/gene:ENSG00000259529/DDX3Y/C1R/OSCAR/transcript:ENST00000507392/C1S/INPP5J/IRF5/transcript:ENST00000587251/IRF8/ERN1/CD300C/CLEC12A/transcript:ENST00000533182/FCGR1A/LILRB4/LGALS9/EHF/IRF9/KCNN3/SERPING1	CD300LB/ELF5/transcript:ENST00000515800/FCGR2A/CD6/transcript:ENST00000620309
BP	GO:0014850	response to muscle activity	0.0165 (32/1936)	0.0143 (446/31285)	0.0923781	1	32	FLT1/MX2/SLC7A5/ROS1/SLC7A11/RPS6KA2/INHBA/transcript:ENST00000375290/transcript:ENST00000623287/BRSK2/transcript:ENST00000626154/SLC7A7/C8orf44-SGK3/INHBE/SRD5A2/transcript:ENST00000357390/transcript:ENST00000357048/C1QA/transcript:ENST00000556575/MX1/SLC3A2	transcript:ENST00000566598/SLC38A6/PTCH1/RP11-47I22.4/SLC38A4/COL17A1/transcript:ENST00000507018/transcript:ENST00000270361/ITGA10/transcript:ENST00000549258/transcript:ENST00000504875
BP	GO:0007040	lysosome organization	0.0165 (32/1936)	0.0143 (446/31285)	0.0923781	1	32	transcript:ENST00000576863/TFEC/transcript:ENST00000635811/MYO1G/ATP11A/transcript:ENST00000479719/transcript:ENST00000334075/transcript:ENST00000636866/MYO1F/RP11-468E2.1/LRRK1/ABCA10/transcript:ENST00000562746/ZNF396/transcript:ENST00000573150/WDFY4/transcript:ENST00000424354/ATP8B3/MYO15B/ABCA5/transcript:ENST00000429411/RP13-582O9.6	transcript:ENST00000568422/ACPP/transcript:ENST00000531547/transcript:ENST00000586995/RP11-315D16.2/transcript:ENST00000637871/ATP8A1/DHRS9/RDH5/transcript:ENST00000576500
BP	GO:0016325	oocyte microtubule cytoskeleton organization	0.0031 (6/1936)	0.0018 (56/31285)	0.0925002	1	6	transcript:ENST00000502762/transcript:ENST00000545236/transcript:ENST00000514671	BCL2L2-PABPN1/transcript:ENST00000549394/transcript:ENST00000630114
MF	GO:0015291	secondary active transmembrane transporter activity	0.0031 (6/1936)	0.0018 (56/31285)	0.0925002	1	6	transcript:ENST00000525723/transcript:ENST00000491736	transcript:ENST00000566598/SLC38A6/transcript:ENST00000493963/SLC38A4
BP	GO:0097749	membrane tubulation	0.0031 (6/1936)	0.0018 (56/31285)	0.0925002	1	6	NCF4/MX2/transcript:ENST00000518116/MX1	NOSTRIN/FAM92A
CC	GO:0110115	Cdr2 medial cortical node complex	0.0031 (6/1936)	0.0018 (56/31285)	0.0925002	1	6	BRSK2/TRIB3/transcript:ENST00000618568/transcript:ENST00000551092	transcript:ENST00000382240/transcript:ENST00000458140
BP	GO:0021575	hindbrain morphogenesis	0.0057 (11/1936)	0.0040 (125/31285)	0.0925139	1	11	NR4A1/ARHGAP4/NR1I3/MSC/VDR/transcript:ENST00000523864/transcript:ENST00000495242/HES1/ARHGAP40/HEY1/OLIG2
BP	GO:0006283	transcription-coupled nucleotide-excision repair	0.0057 (11/1936)	0.0040 (125/31285)	0.0925139	1	11	transcript:ENST00000563961/USP18/BIVM-ERCC5/HELZ2/transcript:ENST00000482936/transcript:ENST00000616321	transcript:ENST00000431390/ERCC5/DDB2/transcript:ENST00000484566/RTEL1
BP	GO:0048132	female germ-line stem cell asymmetric division	0.0067 (13/1936)	0.0049 (154/31285)	0.0925168	1	13	RP11-468E2.1/PRKRA/transcript:ENST00000518360/transcript:ENST00000443963/MERTK/transcript:ENST00000445387/ROS1/AURKC/transcript:ENST00000533523	transcript:ENST00000484566/transcript:ENST00000413809/transcript:ENST00000454350/transcript:ENST00000424699
CC	GO:0097470	ribbon synapse	0.0067 (13/1936)	0.0049 (154/31285)	0.0925168	1	13	CES1/RASGRP3/SYTL1/RASGEF1B/SYT7/CES3/DYSF/FMNL3/UNC13D/RASGRF2	transcript:ENST00000482958/SYTL2/SYTL5
BP	GO:0035740	CD8-positive, alpha-beta T cell proliferation	0.0021 (4/1936)	0.0010 (31/31285)	0.0931594	1	4	LILRB2/LILRA5/LILRB4/LILRA6
BP	GO:1901145	mesenchymal cell apoptotic process involved in nephron morphogenesis	0.0021 (4/1936)	0.0010 (31/31285)	0.0931594	1	4	GDF15/INHBE/BMP6/INHBA
MF	GO:0140953	histone H3K27 monomethyltransferase activity	0.0021 (4/1936)	0.0010 (31/31285)	0.0931594	1	4	transcript:ENST00000445387/transcript:ENST00000558084/transcript:ENST00000534320	transcript:ENST00000413809
BP	GO:0060437	lung growth	0.0021 (4/1936)	0.0010 (31/31285)	0.0931594	1	4	transcript:ENST00000520579/RSPO3/FLT1	transcript:ENST00000504875
MF	GO:0016401	palmitoyl-CoA oxidase activity	0.0021 (4/1936)	0.0010 (31/31285)	0.0931594	1	4	transcript:ENST00000481262/transcript:ENST00000583858	transcript:ENST00000478631/ACADVL
MF	GO:0001637	G protein-coupled chemoattractant receptor activity	0.0021 (4/1936)	0.0010 (31/31285)	0.0931594	1	4	C5AR1/FPR3/GPR1/CMKLR1
BP	GO:0072040	negative regulation of mesenchymal cell apoptotic process involved in nephron morphogenesis	0.0021 (4/1936)	0.0010 (31/31285)	0.0931594	1	4	GDF15/INHBE/BMP6/INHBA
MF	GO:0004956	prostaglandin D receptor activity	0.0021 (4/1936)	0.0010 (31/31285)	0.0931594	1	4	C5AR1/FPR3/GPR1/CMKLR1
CC	GO:0009279	cell outer membrane	0.0021 (4/1936)	0.0010 (31/31285)	0.0931594	1	4	transcript:ENST00000412494/SLC3A2	RDH5/transcript:ENST00000422589
BP	GO:0072382	minus-end-directed vesicle transport along microtubule	0.0021 (4/1936)	0.0010 (31/31285)	0.0931594	1	4	DNAH12/WDR78	transcript:ENST00000564136/DYNC1I1
BP	GO:0072435	response to mitotic G2 DNA damage checkpoint signaling	0.0021 (4/1936)	0.0010 (31/31285)	0.0931594	1	4	transcript:ENST00000409403/CDK18	CDK15/transcript:ENST00000555408
BP	GO:1905460	negative regulation of vascular associated smooth muscle cell apoptotic process	0.0021 (4/1936)	0.0010 (31/31285)	0.0931594	1	4	SLC7A7/SLC7A11/SLC7A5	transcript:ENST00000592705
MF	GO:0001785	prostaglandin J receptor activity	0.0021 (4/1936)	0.0010 (31/31285)	0.0931594	1	4	C5AR1/FPR3/GPR1/CMKLR1
BP	GO:0110076	negative regulation of ferroptosis	0.0021 (4/1936)	0.0010 (31/31285)	0.0931594	1	4	GPX3/SLC7A7/SLC7A11/SLC7A5
BP	GO:0003056	regulation of vascular associated smooth muscle contraction	0.0041 (8/1936)	0.0027 (83/31285)	0.0933982	1	8	ATP8B3/ZDHHC11/transcript:ENST00000543984/ATP11A/P2RX7	transcript:ENST00000478793/MAP2K3/ATP8A1
BP	GO:0036446	myofibroblast differentiation	0.0041 (8/1936)	0.0027 (83/31285)	0.0933982	1	8	ATF3/CXCL5/CXCL8/CXCL3/CXCL2/transcript:ENST00000437844	LRRC17/LRRTM4
BP	GO:0002082	regulation of oxidative phosphorylation	0.0041 (8/1936)	0.0027 (83/31285)	0.0933982	1	8	transcript:ENST00000557348/transcript:ENST00000553837/transcript:ENST00000464443/transcript:ENST00000557433/transcript:ENST00000555563/transcript:ENST00000394606/PARP9	transcript:ENST00000556825
BP	GO:1990504	dense core granule exocytosis	0.0041 (8/1936)	0.0027 (83/31285)	0.0933982	1	8	C8orf44-SGK3/RASGRP3/SYT7/RPS6KA2/UNC13D	SYTL2/RP11-47I22.4/SYTL5
BP	GO:0008366	axon ensheathment	0.0072 (14/1936)	0.0054 (169/31285)	0.0935287	1	14	VDR/transcript:ENST00000610164/transcript:ENST00000593532/transcript:ENST00000554738/SIGLEC1/CLDN7/SCHIP1/CLDN1/transcript:ENST00000504476/SDK2/transcript:ENST00000591662	NRXN3/NCAM2/IQCJ-SCHIP1
BP	GO:0033962	P-body assembly	0.0052 (10/1936)	0.0035 (111/31285)	0.0936228	1	10	transcript:ENST00000522644/transcript:ENST00000562583/transcript:ENST00000600289/DNAH12/transcript:ENST00000498479/WDFY4	transcript:ENST00000484566/transcript:ENST00000533164/transcript:ENST00000506734/LSM4
BP	GO:2001032	regulation of double-strand break repair via nonhomologous end joining	0.0052 (10/1936)	0.0035 (111/31285)	0.0936228	1	10	USP18/transcript:ENST00000609106/transcript:ENST00000607932/transcript:ENST00000445387/transcript:ENST00000312087/transcript:ENST00000589225	transcript:ENST00000353275/transcript:ENST00000431180/KMT2C/transcript:ENST00000506871
CC	GO:0016442	RISC complex	0.0052 (10/1936)	0.0035 (111/31285)	0.0936228	1	10	transcript:ENST00000536606/TDRD6/PRKRA/transcript:ENST00000491718/DDX3Y/IFIH1/DHX58	transcript:ENST00000484566/transcript:ENST00000533164/transcript:ENST00000424699
BP	GO:0001780	neutrophil homeostasis	0.0093 (18/1936)	0.0073 (229/31285)	0.0938422	1	18	SLA/LILRA5/transcript:ENST00000460679/FLT1/LILRB2/GBP4/GBP5/LILRB4/BTK/HCK/LILRA6	PDE3A/ITK/PDE11A/transcript:ENST00000508798/transcript:ENST00000530726/transcript:ENST00000560014/transcript:ENST00000504875
BP	GO:0048660	regulation of smooth muscle cell proliferation	0.0046 (9/1936)	0.0031 (97/31285)	0.0940321	1	9	NR4A1/INHBE/JUP/GDF15/BMP6/KCNN3/INHBA	PDE11A/PDE3A
MF	GO:0140938	histone H3 methyltransferase activity	0.0046 (9/1936)	0.0031 (97/31285)	0.0940321	1	9	transcript:ENST00000558084/transcript:ENST00000413704/transcript:ENST00000445387/transcript:ENST00000312087	transcript:ENST00000353275/transcript:ENST00000431180/transcript:ENST00000334884/transcript:ENST00000413809/KMT2C
BP	GO:0021532	neural tube patterning	0.0046 (9/1936)	0.0031 (97/31285)	0.0940321	1	9	transcript:ENST00000518360/transcript:ENST00000464497/transcript:ENST00000375290/transcript:ENST00000559883/TBC1D32	C14orf105/transcript:ENST00000488206/PTCH1/transcript:ENST00000464622
BP	GO:0060445	branching involved in salivary gland morphogenesis	0.0077 (15/1936)	0.0059 (184/31285)	0.0940858	1	15	INHBE/FLT1/SCARF1/IL6/MERTK/GDF15/BMP6/transcript:ENST00000554738/ESRP1/ESRP2/INHBA/ROS1/NTNG2	NRXN3/transcript:ENST00000504875
CC	GO:0032010	phagolysosome	0.0083 (16/1936)	0.0064 (199/31285)	0.094279	1	16	SERPINB2/RP11-468E2.1/ADAMTS14/NCF4/LRRK1/CTSZ/ADAMTS5/NCF1/PSTPIP1/CD36/transcript:ENST00000545307/transcript:ENST00000495564/transcript:ENST00000529473/CTSH	transcript:ENST00000468065/transcript:ENST00000526491
BP	GO:0097192	extrinsic apoptotic signaling pathway in absence of ligand	0.0108 (21/1936)	0.0088 (275/31285)	0.09442	1	21	NGF/transcript:ENST00000521724/PTGDS/CCL8/PNMA2/IL1RN/GDF15/CCL7/IL1A/COL9A2/IL1B/transcript:ENST00000465115	COL13A1/SYNGAP1/BCL2L2-PABPN1/EYA1/COL17A1/TNFRSF10D/transcript:ENST00000453535/transcript:ENST00000485036/ITGA10
BP	GO:0005977	glycogen metabolic process	0.0103 (20/1936)	0.0083 (260/31285)	0.0953311	1	20	EBI3/ANPEP/TRIB3/transcript:ENST00000478046/PGF/RPS6KA2/ERN1/PCDH17/C8orf44-SGK3/PPP1R3F/transcript:ENST00000556575	BBS4/TMTC2/CDHR3/RP11-47I22.4/transcript:ENST00000484979/PRLR/LEPR/transcript:ENST00000546531/transcript:ENST00000453535
BP	GO:2001171	positive regulation of ATP biosynthetic process	0.0067 (13/1936)	0.0050 (155/31285)	0.0960885	1	13	transcript:ENST00000452281/CD300C/NR1I3/VDR/transcript:ENST00000491736/transcript:ENST00000615986/ADCY10/transcript:ENST00000593532/transcript:ENST00000263812/STAT1/transcript:ENST00000394606	MAP2K3/BCL2L2-PABPN1
MF	GO:0010385	double-stranded methylated DNA binding	0.0067 (13/1936)	0.0050 (155/31285)	0.0960885	1	13	transcript:ENST00000576863/ZNF396/transcript:ENST00000534320/transcript:ENST00000445387/transcript:ENST00000334075/KRBOX1/transcript:ENST00000591278/PARP9	transcript:ENST00000413809/transcript:ENST00000576500/transcript:ENST00000423973/transcript:ENST00000468435/KLF17
BP	GO:0050850	positive regulation of calcium-mediated signaling	0.0212 (41/1936)	0.0189 (592/31285)	0.096415	1	41	transcript:ENST00000460679/transcript:ENST00000483665/FLT1/RASGRP3/TRPA1/RASGRF2/CCL3/transcript:ENST00000620154/MSC/KCNIP2/SIGLEC1/CCL8/CD300C/transcript:ENST00000520579/CLEC12A/CD4/P2RX7/FCGR1A/CCL7/OLIG2/IAPP/transcript:ENST00000504476/BCAM/RASGEF1B/transcript:ENST00000543984/CXCL8/CALCB/SDK2/CCL20	GIPR/transcript:ENST00000515800/transcript:ENST00000536532/ADORA2A/CDH18/EFCAB1/transcript:ENST00000539548/NCAM2/MAP2K3/FCGR2A/ITGA10/transcript:ENST00000504875
BP	GO:0120188	regulation of bile acid secretion	0.0057 (11/1936)	0.0040 (126/31285)	0.0965145	1	11	CES1/NR1I3/BRSK2/VDR/CES3/transcript:ENST00000593532/transcript:ENST00000626154/ABCC3/SLCO1B3/SLCO2B1	transcript:ENST00000482958
MF	GO:0071933	Arp2/3 complex binding	0.0057 (11/1936)	0.0040 (126/31285)	0.0965145	1	11	IQGAP2/MYO15B/PSTPIP1/MYO1G/transcript:ENST00000616321/MYO1F	transcript:ENST00000633485/AL513122.2/DYNC1I1/transcript:ENST00000414983/transcript:ENST00000420201
MF	GO:0140664	ATP-dependent DNA damage sensor activity	0.0036 (7/1936)	0.0022 (70/31285)	0.0966804	1	7	transcript:ENST00000475762/transcript:ENST00000482007/transcript:ENST00000463144/transcript:ENST00000312087	transcript:ENST00000353275/transcript:ENST00000588594/transcript:ENST00000493662
BP	GO:0044726	epigenetic programing of female pronucleus	0.0036 (7/1936)	0.0022 (70/31285)	0.0966804	1	7	transcript:ENST00000576863/ZNF396/transcript:ENST00000334075/KRBOX1/transcript:ENST00000591278	transcript:ENST00000423973/transcript:ENST00000576500
CC	GO:0045170	spectrosome	0.0036 (7/1936)	0.0022 (70/31285)	0.0966804	1	7	SPTBN5/PSTPIP1/transcript:ENST00000512070/CCNO/transcript:ENST00000495564	transcript:ENST00000420627/gene:ENSG00000273167
BP	GO:0007296	vitellogenesis	0.0036 (7/1936)	0.0022 (70/31285)	0.0966804	1	7	PCK2/FLI1/EHF/RASGEF1B/ATF3/RASGRF2	ELF5
BP	GO:1904799	regulation of neuron remodeling	0.0036 (7/1936)	0.0022 (70/31285)	0.0966804	1	7	NR1I3/VDR/transcript:ENST00000593532/CDK18	transcript:ENST00000555408/transcript:ENST00000510106/CDK15
BP	GO:0016553	base conversion or substitution editing	0.0036 (7/1936)	0.0022 (70/31285)	0.0966804	1	7	transcript:ENST00000492414/RBM39/transcript:ENST00000475126/transcript:ENST00000514671	transcript:ENST00000335760/transcript:ENST00000338163/transcript:ENST00000496664
BP	GO:0045651	positive regulation of macrophage differentiation	0.0072 (14/1936)	0.0054 (170/31285)	0.0969517	1	14	C8orf44-SGK3/CXCL2/CSF2/RASGRP3/TRIB3/CXCL5/CXCL8/UNC13D/CALCB/CXCL3/IAPP	SYTL2/RP11-47I22.4/SYTL5
CC	GO:0030479	actin cortical patch	0.0145 (28/1936)	0.0123 (385/31285)	0.0969655	1	28	ZDHHC11/MX2/MYO1G/ARHGAP40/MYO1F/ADAP2/INPP5J/transcript:ENST00000616321/ADAP1/transcript:ENST00000495564/ARHGAP30/MYO15B/NCF1/transcript:ENST00000545307/PSTPIP1/ARHGAP9/transcript:ENST00000554402/MX1/transcript:ENST00000417500/HERC6	transcript:ENST00000440787/transcript:ENST00000478793/NOSTRIN/transcript:ENST00000426421/transcript:ENST00000420201/transcript:ENST00000617103/transcript:ENST00000600677/transcript:ENST00000455997
BP	GO:0051365	cellular response to potassium ion starvation	0.0052 (10/1936)	0.0036 (112/31285)	0.0979277	1	10	PCK2/BRSK2/transcript:ENST00000495733/transcript:ENST00000626154/AURKC/CYP27B1	SLC38A6/transcript:ENST00000466227/transcript:ENST00000573196/SLC38A4
BP	GO:0060644	mammary gland epithelial cell differentiation	0.0103 (20/1936)	0.0083 (261/31285)	0.098087	1	20	FLI1/IRF7/CEBPD/RPS6KA2/IRF5/transcript:ENST00000375290/IRF8/HOXA10/transcript:ENST00000522484/transcript:ENST00000533182/C8orf44-SGK3/EHF/IRF9/HOXA5/transcript:ENST00000556575	PTCH1/ELF5/HOXB6/RP11-47I22.4/PRLR
BP	GO:1900182	positive regulation of protein localization to nucleus	0.0212 (41/1936)	0.0190 (593/31285)	0.0982234	1	41	CDKL3/TRIB3/C1R/MNDA/ROS1/SESN2/ZIC2/CARD9/transcript:ENST00000495733/C1S/BTK/RPS6KA2/INHBA/C2/GDF15/BMP6/HCK/gene:ENSG00000255663/PARP9/DUSP1/C8orf44-SGK3/SLA/INHBE/CDK18/DTX4/PSTPIP1/transcript:ENST00000600806/transcript:ENST00000435201/transcript:ENST00000556575/transcript:ENST00000616467	ITK/CDK15/BBS4/TMTC2/NOSTRIN/RP11-47I22.4/transcript:ENST00000566631/transcript:ENST00000542140/transcript:ENST00000555408/transcript:ENST00000482010/CDKL5
CC	GO:0043202	lysosomal lumen	0.0238 (46/1936)	0.0215 (674/31285)	0.098366	1	46	transcript:ENST00000538239/CTSZ/SMPDL3B/FLT1/TNF/CSF3/TNFAIP6/ATP11A/GALC/RP11-295K3.1/SERPINB2/ECM2/DCN/transcript:ENST00000554738/transcript:ENST00000540424/SIGLEC1/transcript:ENST00000491768/transcript:ENST00000558161/MRC1/transcript:ENST00000541960/FLRT1/transcript:ENST00000520579/transcript:ENST00000570856/transcript:ENST00000573150/NEU4/CD36/transcript:ENST00000534405/transcript:ENST0000044…	CSMD3/SMPD1/ACPP/transcript:ENST00000533123/transcript:ENST00000531547/transcript:ENST00000636494/transcript:ENST00000531303/NRXN3/CHODL/NCAM2/transcript:ENST00000504875
BP	GO:0072049	comma-shaped body morphogenesis	0.0026 (5/1936)	0.0014 (44/31285)	0.098427	1	5	transcript:ENST00000435201/LMO1/HES1/HEY1/transcript:ENST00000558656
BP	GO:0045936	negative regulation of phosphate metabolic process	0.0026 (5/1936)	0.0014 (44/31285)	0.098427	1	5	CDKL3/PPP1R15A/CDK18	transcript:ENST00000555408/CDK15
BP	GO:0000056	ribosomal small subunit export from nucleus	0.0026 (5/1936)	0.0014 (44/31285)	0.098427	1	5	transcript:ENST00000536606/transcript:ENST00000432522	transcript:ENST00000530170/transcript:ENST00000530721/RANBP3L
BP	GO:0045026	plasma membrane fusion	0.0026 (5/1936)	0.0014 (44/31285)	0.098427	1	5	FLT1/SCARF1/MERTK/transcript:ENST00000529473	transcript:ENST00000526491
BP	GO:0034163	regulation of toll-like receptor 9 signaling pathway	0.0026 (5/1936)	0.0014 (44/31285)	0.098427	1	5	TLR2/TLR4/FCGR1A	FCGR2A/LRRTM4
MF	GO:0016417	S-acyltransferase activity	0.0026 (5/1936)	0.0014 (44/31285)	0.098427	1	5	ZDHHC11/TRPA1/transcript:ENST00000443120	transcript:ENST00000478793/ANKRD23
BP	GO:1903235	positive regulation of calcium ion-dependent exocytosis of neurotransmitter	0.0026 (5/1936)	0.0014 (44/31285)	0.098427	1	5	SYTL1/SYT7/UNC13D	SYTL2/SYTL5
BP	GO:1905598	negative regulation of low-density lipoprotein receptor activity	0.0041 (8/1936)	0.0027 (84/31285)	0.098444	1	8	ABCA5/ABCA10/C1QA/gene:ENSG00000259753/C1QB/C1QC	transcript:ENST00000586995/ITGA10
BP	GO:0006687	glycosphingolipid metabolic process	0.0041 (8/1936)	0.0027 (84/31285)	0.098444	1	8	FLT1/ABCA5/ABCA10/SMPD3/transcript:ENST00000490460	MAP7D2/transcript:ENST00000586995/transcript:ENST00000504875
CC	GO:0045169	fusome	0.0124 (24/1936)	0.0103 (323/31285)	0.0984636	1	24	CDKL3/CTSZ/LRRC2/RP11-468E2.1/CCNO/transcript:ENST00000434055/DNAH12/transcript:ENST00000495564/CTSH/transcript:ENST00000533523/SPTBN5/PSTPIP1/transcript:ENST00000512070/CDK18	transcript:ENST00000564136/DCTN1/CDK15/transcript:ENST00000415891/transcript:ENST00000420627/transcript:ENST00000555408/gene:ENSG00000273167/transcript:ENST00000453535/CDKL5/transcript:ENST00000568004
BP	GO:0045064	T-helper 2 cell differentiation	0.0062 (12/1936)	0.0045 (141/31285)	0.0984837	1	12	transcript:ENST00000558084/IL6/transcript:ENST00000413704/transcript:ENST00000445387/CSF2RB/BATF2/transcript:ENST00000507218	transcript:ENST00000547146/transcript:ENST00000419510/transcript:ENST00000465045/transcript:ENST00000334884/KMT2C
BP	GO:2000276	negative regulation of oxidative phosphorylation uncoupler activity	0.0015 (3/1936)	0.0006 (20/31285)	0.0985136	1	3	transcript:ENST00000472580/transcript:ENST00000429888	transcript:ENST00000415933
BP	GO:0007023	post-chaperonin tubulin folding pathway	0.0015 (3/1936)	0.0006 (20/31285)	0.0985136	1	3	transcript:ENST00000434055	DCTN1/transcript:ENST00000415891
BP	GO:0140924	L-kynurenine transmembrane transport	0.0015 (3/1936)	0.0006 (20/31285)	0.0985136	1	3	SLC7A7/SLC7A11/SLC7A5
BP	GO:1901492	positive regulation of lymphangiogenesis	0.0015 (3/1936)	0.0006 (20/31285)	0.0985136	1	3	PGF/HOXD9/HOXA10
BP	GO:1904375	regulation of protein localization to cell periphery	0.0015 (3/1936)	0.0006 (20/31285)	0.0985136	1	3	ABCA5/ABCA10	transcript:ENST00000586995
MF	GO:0008709	cholate 7-alpha-dehydrogenase activity	0.0015 (3/1936)	0.0006 (20/31285)	0.0985136	1	3	transcript:ENST00000442122	DHRS9/RDH5
BP	GO:0002439	chronic inflammatory response to antigenic stimulus	0.0015 (3/1936)	0.0006 (20/31285)	0.0985136	1	3	IL1RN/TNF/IL1B
MF	GO:0030487	inositol-4,5-bisphosphate 5-phosphatase activity	0.0015 (3/1936)	0.0006 (20/31285)	0.0985136	1	3	INPP5J	transcript:ENST00000515800/transcript:ENST00000455997
BP	GO:0002282	microglial cell activation involved in immune response	0.0015 (3/1936)	0.0006 (20/31285)	0.0985136	1	3	TYROBP/CD300C/CCR5
MF	GO:0019970	interleukin-11 binding	0.0015 (3/1936)	0.0006 (20/31285)	0.0985136	1	3	EBI3	PRLR/LEPR
CC	GO:0097234	epidermal lamellar body membrane	0.0015 (3/1936)	0.0006 (20/31285)	0.0985136	1	3	ABCA5/ABCA10	transcript:ENST00000586995
CC	GO:0097526	spliceosomal tri-snRNP complex	0.0015 (3/1936)	0.0006 (20/31285)	0.0985136	1	3	transcript:ENST00000600289	LSM4/transcript:ENST00000439775
BP	GO:0034342	response to type III interferon	0.0015 (3/1936)	0.0006 (20/31285)	0.0985136	1	3	MX2/IL20RB/MX1
BP	GO:0032464	positive regulation of protein homooligomerization	0.0015 (3/1936)	0.0006 (20/31285)	0.0985136	1	3	ABCA5/ABCA10	transcript:ENST00000586995
BP	GO:0032384	negative regulation of intracellular cholesterol transport	0.0015 (3/1936)	0.0006 (20/31285)	0.0985136	1	3	ABCA5/ABCA10	transcript:ENST00000586995
BP	GO:0032379	positive regulation of intracellular lipid transport	0.0015 (3/1936)	0.0006 (20/31285)	0.0985136	1	3	ABCA5/ABCA10	transcript:ENST00000586995
BP	GO:0060558	regulation of calcidiol 1-monooxygenase activity	0.0015 (3/1936)	0.0006 (20/31285)	0.0985136	1	3	transcript:ENST00000593532/NR1I3/VDR
BP	GO:0071405	cellular response to methanol	0.0015 (3/1936)	0.0006 (20/31285)	0.0985136	1	3	CES1/CES3	transcript:ENST00000482958
BP	GO:0010849	regulation of proton-transporting ATPase activity, rotational mechanism	0.0015 (3/1936)	0.0006 (20/31285)	0.0985136	1	3	transcript:ENST00000472580/transcript:ENST00000429888	transcript:ENST00000415933
BP	GO:0010585	glutamine secretion	0.0015 (3/1936)	0.0006 (20/31285)	0.0985136	1	3	SLC1A4	SLC38A4/SLC38A6
MF	GO:0140347	N-retinylidene-phosphatidylethanolamine flippase activity	0.0015 (3/1936)	0.0006 (20/31285)	0.0985136	1	3	ABCA5/ABCA10	transcript:ENST00000586995
BP	GO:0061388	regulation of rate of cell growth	0.0015 (3/1936)	0.0006 (20/31285)	0.0985136	1	3	SSH3/DUSP1	transcript:ENST00000532881
BP	GO:0035053	dorsal vessel heart proper cell fate commitment	0.0015 (3/1936)	0.0006 (20/31285)	0.0985136	1	3	transcript:ENST00000593532/NR1I3/VDR
BP	GO:1903786	regulation of glutathione biosynthetic process	0.0015 (3/1936)	0.0006 (20/31285)	0.0985136	1	3	SLC7A7/SLC7A11/SLC7A5
MF	GO:0004921	interleukin-11 receptor activity	0.0015 (3/1936)	0.0006 (20/31285)	0.0985136	1	3	EBI3	PRLR/LEPR
BP	GO:0044091	membrane biogenesis	0.0015 (3/1936)	0.0006 (20/31285)	0.0985136	1	3	transcript:ENST00000434055	DCTN1/transcript:ENST00000415891
MF	GO:0005127	ciliary neurotrophic factor receptor binding	0.0015 (3/1936)	0.0006 (20/31285)	0.0985136	1	3		PRLR/CNTF/LEPR
BP	GO:0000019	regulation of mitotic recombination	0.0015 (3/1936)	0.0006 (20/31285)	0.0985136	1	3	transcript:ENST00000482936	transcript:ENST00000533482/RTEL1
BP	GO:1901873	regulation of post-translational protein modification	0.0015 (3/1936)	0.0006 (20/31285)	0.0985136	1	3	ABCA5/ABCA10	transcript:ENST00000586995
BP	GO:0009202	deoxyribonucleoside triphosphate biosynthetic process	0.0015 (3/1936)	0.0006 (20/31285)	0.0985136	1	3	RRM1	transcript:ENST00000532170/transcript:ENST00000533349
MF	GO:0015327	cystine:glutamate antiporter activity	0.0015 (3/1936)	0.0006 (20/31285)	0.0985136	1	3	SLC7A7/SLC7A11/SLC7A5
BP	GO:0006548	L-histidine catabolic process	0.0015 (3/1936)	0.0006 (20/31285)	0.0985136	1	3	GAD1	AMDHD1/transcript:ENST00000493875
MF	GO:1990631	ErbB-4 class receptor binding	0.0015 (3/1936)	0.0006 (20/31285)	0.0985136	1	3	transcript:ENST00000460679/gene:ENSG00000255663	transcript:ENST00000542140
CC	GO:0120202	rod photoreceptor disc membrane	0.0015 (3/1936)	0.0006 (20/31285)	0.0985136	1	3	ABCA5/ABCA10	transcript:ENST00000586995
BP	GO:2000818	negative regulation of myoblast proliferation	0.0015 (3/1936)	0.0006 (20/31285)	0.0985136	1	3	INHBE/BMP6/INHBA
BP	GO:0036261	7-methylguanosine cap hypermethylation	0.0015 (3/1936)	0.0006 (20/31285)	0.0985136	1	3	transcript:ENST00000600289	LSM4/transcript:ENST00000439775
BP	GO:0010903	negative regulation of very-low-density lipoprotein particle remodeling	0.0015 (3/1936)	0.0006 (20/31285)	0.0985136	1	3	transcript:ENST00000593532/NR1I3/VDR
BP	GO:0033029	regulation of neutrophil apoptotic process	0.0015 (3/1936)	0.0006 (20/31285)	0.0985136	1	3	SLC7A7/SLC7A11/SLC7A5
MF	GO:0140926	L-kynurenine transmembrane transporter activity	0.0015 (3/1936)	0.0006 (20/31285)	0.0985136	1	3	SLC7A7/SLC7A11/SLC7A5
BP	GO:0055081	monoatomic anion homeostasis	0.0015 (3/1936)	0.0006 (20/31285)	0.0985136	1	3	ATP11A/ATP8B3	ATP8A1
BP	GO:0045659	negative regulation of neutrophil differentiation	0.0015 (3/1936)	0.0006 (20/31285)	0.0985136	1	3	INPP5J/TRIB3	transcript:ENST00000515800
BP	GO:1990646	cellular response to prolactin	0.0046 (9/1936)	0.0031 (98/31285)	0.0986824	1	9	SLA/IL6/ATF3/BTK/HCK/ROS1/transcript:ENST00000394606	BCL2L2-PABPN1/ITK
BP	GO:0048525	negative regulation of viral process	0.0031 (6/1936)	0.0018 (57/31285)	0.098751	1	6	OAS2/PTX3/OAS1/transcript:ENST00000495733/OAS3	transcript:ENST00000335760
BP	GO:0098725	symmetric cell division	0.0031 (6/1936)	0.0018 (57/31285)	0.098751	1	6	CDKL3/CDK18	transcript:ENST00000453535/transcript:ENST00000555408/CDKL5/CDK15
BP	GO:1901987	regulation of cell cycle phase transition	0.0031 (6/1936)	0.0018 (57/31285)	0.098751	1	6	transcript:ENST00000536606/CDKL3/CDK18	transcript:ENST00000555408/transcript:ENST00000413643/CDK15
CC	GO:0032998	Fc-epsilon receptor I complex	0.0031 (6/1936)	0.0018 (57/31285)	0.098751	1	6	FCER1G/LILRA5/LILRB2/LILRA6/LILRB4/OSCAR
BP	GO:0061795	Golgi lumen acidification	0.0031 (6/1936)	0.0018 (57/31285)	0.098751	1	6	transcript:ENST00000635734/transcript:ENST00000561852/ATP6V0D2/transcript:ENST00000376185/transcript:ENST00000636787	transcript:ENST00000554087
BP	GO:0033621	nuclear-transcribed mRNA catabolic process, meiosis-specific transcripts	0.0031 (6/1936)	0.0018 (57/31285)	0.098751	1	6	ISG15/HELZ2/transcript:ENST00000475126/DDX60	BCL2L2-PABPN1/transcript:ENST00000552994
CC	GO:0005937	mating projection	0.0031 (6/1936)	0.0018 (57/31285)	0.098751	1	6	transcript:ENST00000269361/IQGAP2/FMNL3/SEPT5	transcript:ENST00000633485/transcript:ENST00000455843
MF	GO:0016628	oxidoreductase activity, acting on the CH-CH group of donors, NAD or NADP as acceptor	0.0031 (6/1936)	0.0018 (57/31285)	0.098751	1	6	transcript:ENST00000442122/SRD5A2/transcript:ENST00000583858/TM7SF2/transcript:ENST00000481262	ACADVL
BP	GO:0014911	positive regulation of smooth muscle cell migration	0.0248 (48/1936)	0.0226 (707/31285)	0.0991931	1	48	FLT1/TRIB3/ESR1/TNFAIP6/ROS1/RASGRF2/CCL3/MMP9/CAMK1D/gene:ENSG00000259753/BTK/RPS6KA2/CCL8/ERN1/transcript:ENST00000452281/transcript:ENST00000520579/TLR4/MMP12/GPR35/HCK/HAS1/STAT1/transcript:ENST00000394606/CCL7/MMP3/C8orf44-SGK3/SLA/TLR2/RASGEF1B/CYP1A1/transcript:ENST00000519993/transcript:ENST00000556575	transcript:ENST00000472940/ITK/PDE3A/RP11-47I22.4/transcript:ENST00000414983/transcript:ENST00000420201/transcript:ENST00000382240/PRLR/BCL2L2-PABPN1/LEPR/DCLK1/transcript:ENST00000507018/PDE11A/ITGA10/SEMA4G/transcript:ENST00000504875
BP	GO:0048172	regulation of short-term neuronal synaptic plasticity	0.0093 (18/1936)	0.0074 (231/31285)	0.0997301	1	18	transcript:ENST00000558084/RASGRP3/MX2/SPTBN5/transcript:ENST00000413704/transcript:ENST00000425141/transcript:ENST00000445387/UNC13D/MX1/transcript:ENST00000636866/NGF	transcript:ENST00000637871/transcript:ENST00000465045/transcript:ENST00000334884/transcript:ENST00000568422/KMT2C/SLC4A3/SLC4A4
BP	GO:0031663	lipopolysaccharide-mediated signaling pathway	0.0150 (29/1936)	0.0128 (402/31285)	0.0997359	1	29	CD163/IRF7/transcript:ENST00000588198/transcript:ENST00000496808/BTK/RPS6KA2/IRF5/IRAK3/transcript:ENST00000587251/IRF8/transcript:ENST00000452281/CD300C/PTPRO/TLR4/HCK/STAT1/transcript:ENST00000369973/transcript:ENST00000533182/C8orf44-SGK3/SLA/TLR2/EHF/IRF9/transcript:ENST00000556575	ELF5/ITK/RP11-47I22.4/TICAM2/CD6
BP	GO:0045577	regulation of B cell differentiation	0.0067 (13/1936)	0.0050 (156/31285)	0.0997435	1	13	NFAM1/TLR2/CARD9/PTPRO/TLR4/SLAMF7/FCGR1A/IL4I1	transcript:ENST00000479896/transcript:ENST00000485036/FCGR2A/LRRTM4/transcript:ENST00000515800
BP	GO:0044773	mitotic DNA damage checkpoint signaling	0.0072 (14/1936)	0.0055 (171/31285)	0.100451	1	14	transcript:ENST00000409403/transcript:ENST00000314088/CAMK1D/transcript:ENST00000417588/CDK18/HIST1H2AG/ERN1	transcript:ENST00000382240/transcript:ENST00000555408/DCLK1/RP1/transcript:ENST00000566631/CDK15/RAD9B
BP	GO:0031573	mitotic intra-S DNA damage checkpoint signaling	0.0072 (14/1936)	0.0055 (171/31285)	0.100451	1	14	transcript:ENST00000409403/transcript:ENST00000417588/ATF3/transcript:ENST00000524647/transcript:ENST00000358071/EME2/CDK18	transcript:ENST00000533482/transcript:ENST00000555408/transcript:ENST00000476581/transcript:ENST00000566524/transcript:ENST00000566631/CDK15/RAD9B
BP	GO:0006749	glutathione metabolic process	0.0072 (14/1936)	0.0055 (171/31285)	0.100451	1	14	SLC7A11/SLC1A4/TMX2/ABCC3/transcript:ENST00000474308/CTH/transcript:ENST00000498765/PTGES/GPX3/SLC7A5/GSTM3/SLC7A7	transcript:ENST00000527688/NDP
BP	GO:0050863	regulation of T cell activation	0.0057 (11/1936)	0.0041 (127/31285)	0.100617	1	11	TREX2/SLA/TREX1/transcript:ENST00000495733/CCL7/BTK/HCK/CD4/CCL8/CCL3	ITK
BP	GO:0060033	anatomical structure regression	0.0057 (11/1936)	0.0041 (127/31285)	0.100617	1	11	INHBE/transcript:ENST00000538239/EHF/DGCR2/GDF15/BMP6/transcript:ENST00000435201/LMO1/INHBA/transcript:ENST00000558656	ELF5
BP	GO:1905563	negative regulation of vascular endothelial cell proliferation	0.0057 (11/1936)	0.0041 (127/31285)	0.100617	1	11	transcript:ENST00000460679/VDR/FLT1/SCARF1/RAP1GAP/transcript:ENST00000593532/CCL8/CCL7/CCL3	BORCS8-MEF2B/transcript:ENST00000504875
BP	GO:1900244	positive regulation of synaptic vesicle endocytosis	0.0083 (16/1936)	0.0064 (201/31285)	0.10065	1	16	CES1/NCF4/transcript:ENST00000409403/LRRK1/MX2/CES3/ABCA5/ABCA10/transcript:ENST00000554738/MX1/transcript:ENST00000591662	MPP4/BCL2L2-PABPN1/transcript:ENST00000482958/transcript:ENST00000586995/NRXN3
BP	GO:0016081	synaptic vesicle docking	0.0077 (15/1936)	0.0059 (186/31285)	0.100723	1	15	gene:ENSG00000268400/RASGRP3/SYTL1/SPTBN5/PLA2G4B/transcript:ENST00000311943/UNC13D	MPP4/transcript:ENST00000420627/JMJD7-PLA2G4B/transcript:ENST00000567523/SYTL2/TPRG1/SYTL5/transcript:ENST00000503889
BP	GO:0003139	secondary heart field specification	0.0077 (15/1936)	0.0059 (186/31285)	0.100723	1	15	NR4A1/INHBE/NR1I3/transcript:ENST00000538239/MSC/VDR/GDF15/BMP6/transcript:ENST00000435201/LMO1/INHBA/transcript:ENST00000558656	BORCS8-MEF2B/RGS17/RGS4
BP	GO:0042989	sequestering of actin monomers	0.0021 (4/1936)	0.0010 (32/31285)	0.101984	1	4	transcript:ENST00000468323	transcript:ENST00000498169/AL513122.2/transcript:ENST00000460404
CC	GO:0000220	vacuolar proton-transporting V-type ATPase, V0 domain	0.0021 (4/1936)	0.0010 (32/31285)	0.101984	1	4	ATP6V0D2/transcript:ENST00000635734/transcript:ENST00000636787/transcript:ENST00000561852
BP	GO:0006177	GMP biosynthetic process	0.0021 (4/1936)	0.0010 (32/31285)	0.101984	1	4	transcript:ENST00000623287/transcript:ENST00000580356/transcript:ENST00000484496	transcript:ENST00000424203
BP	GO:1900140	regulation of seedling development	0.0021 (4/1936)	0.0010 (32/31285)	0.101984	1	4	transcript:ENST00000496241	transcript:ENST00000487292/ECI2/JMJD7-PLA2G4B
BP	GO:0045876	positive regulation of sister chromatid cohesion	0.0021 (4/1936)	0.0010 (32/31285)	0.101984	1	4	transcript:ENST00000482936/BIVM-ERCC5	ERCC5/RTEL1
BP	GO:1905933	regulation of cell fate determination	0.0021 (4/1936)	0.0010 (32/31285)	0.101984	1	4	transcript:ENST00000475126/transcript:ENST00000514671/transcript:ENST00000502762	transcript:ENST00000630114
CC	GO:0005688	U6 snRNP	0.0021 (4/1936)	0.0010 (32/31285)	0.101984	1	4	transcript:ENST00000547528/transcript:ENST00000600289	LSM4/transcript:ENST00000484566
BP	GO:0034427	obsolete nuclear-transcribed mRNA catabolic process, exonucleolytic, 3'-5'	0.0021 (4/1936)	0.0010 (32/31285)	0.101984	1	4	DDX60/HELZ2/EXOSC6	transcript:ENST00000465229
BP	GO:0006710	androgen catabolic process	0.0021 (4/1936)	0.0010 (32/31285)	0.101984	1	4	SRD5A2	DHRS9/transcript:ENST00000291892/RDH5
MF	GO:0004982	N-formyl peptide receptor activity	0.0021 (4/1936)	0.0010 (32/31285)	0.101984	1	4	C5AR1/FPR3/GPR1/CMKLR1
MF	GO:0032791	lead ion binding	0.0021 (4/1936)	0.0010 (32/31285)	0.101984	1	4	transcript:ENST00000496241/transcript:ENST00000489775/PLSCR1	ECI2
BP	GO:0051793	medium-chain fatty acid catabolic process	0.0021 (4/1936)	0.0010 (32/31285)	0.101984	1	4	transcript:ENST00000526129/transcript:ENST00000481262/transcript:ENST00000583858	ACADVL
BP	GO:0050727	regulation of inflammatory response	0.0325 (63/1936)	0.0305 (955/31285)	0.102293	1	63	ADAMTS14/ALOX5/VDR/TREX1/SCARF1/TNF/CARD16/IRF7/PTGS2/ESR1/IL1RL1/CCL3/IL24/SLC7A11/CCR5/transcript:ENST00000495733/gene:ENSG00000259753/transcript:ENST00000482914/BTK/IFIH1/IRF5/CCL8/FPR3/DHX58/IRF8/transcript:ENST00000507218/IL1RN/TREX2/USP18/NR4A1/IL18R1/C2/TLR4/ADAMTS5/HCK/PTGES/transcript:ENST00000422741/transcript:ENST00000533182/CCL7/SLC7A7/transcript:ENST00000539881/AKNA/CMKLR1/SLA/TLR2/I…	transcript:ENST00000419510/transcript:ENST00000448002/LRRTM4/CSMD3/ITK/transcript:ENST00000571451/transcript:ENST00000560014/FBXL2/transcript:ENST00000547318/SEMA4G
MF	GO:1904399	heparan sulfate binding	0.0052 (10/1936)	0.0036 (113/31285)	0.102347	1	10	CD163/transcript:ENST00000429888/transcript:ENST00000588198/TNFAIP6/transcript:ENST00000472580/transcript:ENST00000443875/transcript:ENST00000587251	CD6/CSMD3/transcript:ENST00000415933
BP	GO:0010560	positive regulation of glycoprotein biosynthetic process	0.0036 (7/1936)	0.0023 (71/31285)	0.102362	1	7	transcript:ENST00000495733/MERTK/CCL7/CCL20/ROS1/CCL8/CCL3
BP	GO:0099172	presynapse organization	0.0036 (7/1936)	0.0023 (71/31285)	0.102362	1	7	BRSK2/GPR1/transcript:ENST00000626154/TRIB3/C5AR1/FPR3/CMKLR1
CC	GO:0005942	phosphatidylinositol 3-kinase complex	0.0036 (7/1936)	0.0023 (71/31285)	0.102362	1	7	SLA/SYTL1/SYT7/PIK3R5	SYTL2/transcript:ENST00000426902/SYTL5
CC	GO:0070687	macropinocytic cup cytoskeleton	0.0036 (7/1936)	0.0023 (71/31285)	0.102362	1	7	NCF4/MYO15B/FMNL3/MYO1G/PSTPIP1/transcript:ENST00000495564/MYO1F
BP	GO:0001936	regulation of endothelial cell proliferation	0.0046 (9/1936)	0.0032 (99/31285)	0.103463	1	9	INHBE/transcript:ENST00000460679/SCARF1/FLT1/GDF15/MERTK/BMP6/INHBA	transcript:ENST00000504875
BP	GO:0046826	negative regulation of protein export from nucleus	0.0046 (9/1936)	0.0032 (99/31285)	0.103463	1	9	CDKL3/transcript:ENST00000527170/CDK18	transcript:ENST00000555408/CDKL5/transcript:ENST00000455743/transcript:ENST00000510106/transcript:ENST00000566631/CDK15
CC	GO:0061851	leading edge of lamellipodium	0.0046 (9/1936)	0.0032 (99/31285)	0.103463	1	9	SSH3/NCF4/MYO15B/PSTPIP1/MYO1G/transcript:ENST00000545307/transcript:ENST00000495564/MYO1F	transcript:ENST00000532881
BP	GO:0051150	regulation of smooth muscle cell differentiation	0.0046 (9/1936)	0.0032 (99/31285)	0.103463	1	9	INHBE/FLT1/GDF15/BMP6/INHBA/ROS1/transcript:ENST00000437844	transcript:ENST00000513998/transcript:ENST00000504875
CC	GO:0031905	early endosome lumen	0.0041 (8/1936)	0.0027 (85/31285)	0.103641	1	8	SERPINB2/CTSH/CTSZ/ANPEP/transcript:ENST00000493815/WDFY4	SHROOM2/transcript:ENST00000561139
MF	GO:0008186	ATP-dependent activity, acting on RNA	0.0057 (11/1936)	0.0041 (128/31285)	0.104821	1	11	transcript:ENST00000443963/transcript:ENST00000507392/HELZ2/DDX47/DDX3Y/transcript:ENST00000482936/IFIH1/DHX58	transcript:ENST00000484566/RTEL1/transcript:ENST00000354291
BP	GO:0021860	pyramidal neuron development	0.0057 (11/1936)	0.0041 (128/31285)	0.104821	1	11	FLT1/CAMK1D/transcript:ENST00000425141/ROS1	DCLK1/PLXNA4/RP1/SLC4A3/SEMA4G/SLC4A4/transcript:ENST00000504875
BP	GO:0097745	mitochondrial tRNA 5'-end processing	0.0010 (2/1936)	0.0003 (10/31285)	0.104826	1	2		DHRS9/RDH5
MF	GO:0004525	ribonuclease III activity	0.0010 (2/1936)	0.0003 (10/31285)	0.104826	1	2	DHX58/IFIH1
BP	GO:2000227	negative regulation of pancreatic A cell differentiation	0.0010 (2/1936)	0.0003 (10/31285)	0.104826	1	2	HEY1/HES1
BP	GO:0071351	cellular response to interleukin-18	0.0010 (2/1936)	0.0003 (10/31285)	0.104826	1	2	IL18R1/IL1RL1
BP	GO:0045738	negative regulation of DNA repair	0.0010 (2/1936)	0.0003 (10/31285)	0.104826	1	2		transcript:ENST00000530721/transcript:ENST00000530170
BP	GO:1904823	purine nucleobase transmembrane transport	0.0010 (2/1936)	0.0003 (10/31285)	0.104826	1	2	transcript:ENST00000540386	SLC29A2
MF	GO:0022883	zinc efflux transmembrane transporter activity	0.0010 (2/1936)	0.0003 (10/31285)	0.104826	1	2	transcript:ENST00000555840	transcript:ENST00000628474
BP	GO:0070256	negative regulation of mucus secretion	0.0010 (2/1936)	0.0003 (10/31285)	0.104826	1	2		ADORA2A/transcript:ENST00000536532
MF	GO:0030586	[methionine synthase] reductase (NADPH) activity	0.0010 (2/1936)	0.0003 (10/31285)	0.104826	1	2	transcript:ENST00000511461/transcript:ENST00000513439
MF	GO:0004398	histidine decarboxylase activity	0.0010 (2/1936)	0.0003 (10/31285)	0.104826	1	2	GAD1	transcript:ENST00000493875
BP	GO:0021506	anterior neuropore closure	0.0010 (2/1936)	0.0003 (10/31285)	0.104826	1	2	transcript:ENST00000418032/transcript:ENST00000609040
MF	GO:0008252	nucleotidase activity	0.0010 (2/1936)	0.0003 (10/31285)	0.104826	1	2	NT5C3A	transcript:ENST00000580758
BP	GO:0072087	renal vesicle development	0.0010 (2/1936)	0.0003 (10/31285)	0.104826	1	2	HEY1/HES1
BP	GO:0021558	trochlear nerve development	0.0010 (2/1936)	0.0003 (10/31285)	0.104826	1	2	HEY1/HES1
BP	GO:0035340	inosine transport	0.0010 (2/1936)	0.0003 (10/31285)	0.104826	1	2	transcript:ENST00000540386	SLC29A2
BP	GO:1905934	negative regulation of cell fate determination	0.0010 (2/1936)	0.0003 (10/31285)	0.104826	1	2	HEY1/HES1
CC	GO:0000814	ESCRT II complex	0.0010 (2/1936)	0.0003 (10/31285)	0.104826	1	2	transcript:ENST00000507302/transcript:ENST00000514929
MF	GO:0140834	RNA polymerase II CTD heptapeptide repeat S2 kinase activity	0.0010 (2/1936)	0.0003 (10/31285)	0.104826	1	2		transcript:ENST00000544041/transcript:ENST00000555408
MF	GO:0015211	purine nucleoside transmembrane transporter activity	0.0010 (2/1936)	0.0003 (10/31285)	0.104826	1	2	transcript:ENST00000540386	SLC29A2
BP	GO:0042323	negative regulation of circadian sleep/wake cycle, non-REM sleep	0.0010 (2/1936)	0.0003 (10/31285)	0.104826	1	2		ADORA2A/transcript:ENST00000536532
BP	GO:0039534	negative regulation of MDA-5 signaling pathway	0.0010 (2/1936)	0.0003 (10/31285)	0.104826	1	2	DHX58/IFIH1
MF	GO:0008720	D-lactate dehydrogenase activity	0.0010 (2/1936)	0.0003 (10/31285)	0.104826	1	2	transcript:ENST00000400769/transcript:ENST00000436747
BP	GO:0042952	beta-ketoadipate pathway	0.0010 (2/1936)	0.0003 (10/31285)	0.104826	1	2	OXCT2	transcript:ENST00000478631
MF	GO:0015389	pyrimidine- and adenosine-specific:sodium symporter activity	0.0010 (2/1936)	0.0003 (10/31285)	0.104826	1	2	transcript:ENST00000540386	SLC29A2
BP	GO:0062175	brexanolone catabolic process	0.0010 (2/1936)	0.0003 (10/31285)	0.104826	1	2		DHRS9/RDH5
MF	GO:0035639	purine ribonucleoside triphosphate binding	0.0010 (2/1936)	0.0003 (10/31285)	0.104826	1	2	DHX58/IFIH1
BP	GO:0071926	endocannabinoid signaling pathway	0.0010 (2/1936)	0.0003 (10/31285)	0.104826	1	2	ALOXE3/ALOX5
CC	GO:0032301	MutSalpha complex	0.0010 (2/1936)	0.0003 (10/31285)	0.104826	1	2	transcript:ENST00000312087	transcript:ENST00000353275
CC	GO:0090725	peripheral region of growth cone	0.0010 (2/1936)	0.0003 (10/31285)	0.104826	1	2		transcript:ENST00000414983/transcript:ENST00000420201
BP	GO:0050685	positive regulation of mRNA processing	0.0010 (2/1936)	0.0003 (10/31285)	0.104826	1	2	transcript:ENST00000492414	transcript:ENST00000496664
MF	GO:0071820	N-box binding	0.0010 (2/1936)	0.0003 (10/31285)	0.104826	1	2	HEY1/HES1
BP	GO:0021858	GABAergic neuron differentiation in basal ganglia	0.0010 (2/1936)	0.0003 (10/31285)	0.104826	1	2	HEY1/HES1
BP	GO:1903976	negative regulation of glial cell migration	0.0010 (2/1936)	0.0003 (10/31285)	0.104826	1	2		transcript:ENST00000466678/transcript:ENST00000465172
BP	GO:0051134	negative regulation of NK T cell activation	0.0010 (2/1936)	0.0003 (10/31285)	0.104826	1	2	CD300C	CD300LB
BP	GO:0060232	delamination	0.0010 (2/1936)	0.0003 (10/31285)	0.104826	1	2	JUP/AKNA
BP	GO:0072141	renal interstitial fibroblast development	0.0010 (2/1936)	0.0003 (10/31285)	0.104826	1	2	HEY1/HES1
BP	GO:0015862	uridine transmembrane transport	0.0010 (2/1936)	0.0003 (10/31285)	0.104826	1	2	transcript:ENST00000540386	SLC29A2
BP	GO:0015861	cytidine transport	0.0010 (2/1936)	0.0003 (10/31285)	0.104826	1	2	transcript:ENST00000540386	SLC29A2
CC	GO:0016942	insulin-like growth factor binding protein complex	0.0010 (2/1936)	0.0003 (10/31285)	0.104826	1	2	IGFBP3/IGFBP1
BP	GO:1901696	cannabinoid biosynthetic process	0.0010 (2/1936)	0.0003 (10/31285)	0.104826	1	2	ALOXE3/ALOX5
BP	GO:0015860	purine nucleoside transmembrane transport	0.0010 (2/1936)	0.0003 (10/31285)	0.104826	1	2	transcript:ENST00000540386	SLC29A2
BP	GO:0009082	branched-chain amino acid biosynthetic process	0.0010 (2/1936)	0.0003 (10/31285)	0.104826	1	2	SDS	transcript:ENST00000422591
BP	GO:1902569	obsolete negative regulation of activation of Janus kinase activity	0.0010 (2/1936)	0.0003 (10/31285)	0.104826	1	2	CD300C	CD300LB
BP	GO:0072531	pyrimidine-containing compound transmembrane transport	0.0010 (2/1936)	0.0003 (10/31285)	0.104826	1	2	transcript:ENST00000540386	SLC29A2
MF	GO:0005337	nucleoside transmembrane transporter activity	0.0010 (2/1936)	0.0003 (10/31285)	0.104826	1	2	transcript:ENST00000540386	SLC29A2
MF	GO:0043829	tRNA-specific adenosine-37 deaminase activity	0.0010 (2/1936)	0.0003 (10/31285)	0.104826	1	2	transcript:ENST00000492414	transcript:ENST00000496664
MF	GO:0004058	aromatic-L-amino-acid decarboxylase activity	0.0010 (2/1936)	0.0003 (10/31285)	0.104826	1	2	GAD1	transcript:ENST00000493875
MF	GO:0003910	DNA ligase (ATP) activity	0.0010 (2/1936)	0.0003 (10/31285)	0.104826	1	2	transcript:ENST00000601091/transcript:ENST00000594759
BP	GO:0039520	induction by virus of host autophagy	0.0010 (2/1936)	0.0003 (10/31285)	0.104826	1	2	PARP9	RP11-762I7.5
BP	GO:0061106	negative regulation of stomach neuroendocrine cell differentiation	0.0010 (2/1936)	0.0003 (10/31285)	0.104826	1	2	HEY1/HES1
BP	GO:2000981	negative regulation of inner ear receptor cell differentiation	0.0010 (2/1936)	0.0003 (10/31285)	0.104826	1	2	HEY1/HES1
BP	GO:2000417	negative regulation of eosinophil migration	0.0010 (2/1936)	0.0003 (10/31285)	0.104826	1	2	CD300C	CD300LB
BP	GO:1902567	negative regulation of eosinophil activation	0.0010 (2/1936)	0.0003 (10/31285)	0.104826	1	2	CD300C	CD300LB
BP	GO:0032238	adenosine transport	0.0010 (2/1936)	0.0003 (10/31285)	0.104826	1	2	transcript:ENST00000540386	SLC29A2
BP	GO:0071046	nuclear polyadenylation-dependent ncRNA catabolic process	0.0010 (2/1936)	0.0003 (10/31285)	0.104826	1	2	transcript:ENST00000357464/transcript:ENST00000496634
MF	GO:0015213	uridine transmembrane transporter activity	0.0010 (2/1936)	0.0003 (10/31285)	0.104826	1	2	transcript:ENST00000540386	SLC29A2
BP	GO:0019629	propionate catabolic process, 2-methylcitrate cycle	0.0010 (2/1936)	0.0003 (10/31285)	0.104826	1	2		transcript:ENST00000477932/transcript:ENST00000546891
BP	GO:0010336	gibberellic acid homeostasis	0.0010 (2/1936)	0.0003 (10/31285)	0.104826	1	2	transcript:ENST00000541505/SLC15A3
BP	GO:0071787	endoplasmic reticulum tubular network formation	0.0010 (2/1936)	0.0003 (10/31285)	0.104826	1	2	RP11-1035H13.3	transcript:ENST00000563861
BP	GO:0045833	negative regulation of lipid metabolic process	0.0010 (2/1936)	0.0003 (10/31285)	0.104826	1	2	IL1RN/IL1B
MF	GO:0015212	cytidine transmembrane transporter activity	0.0010 (2/1936)	0.0003 (10/31285)	0.104826	1	2	transcript:ENST00000540386	SLC29A2
BP	GO:1901642	nucleoside transmembrane transport	0.0010 (2/1936)	0.0003 (10/31285)	0.104826	1	2	transcript:ENST00000540386	SLC29A2
BP	GO:0070165	positive regulation of adiponectin secretion	0.0031 (6/1936)	0.0019 (58/31285)	0.105219	1	6	VDR/GPR35/transcript:ENST00000593532/C1QA/C1QB/C1QC
MF	GO:0008970	phospholipase A1 activity	0.0031 (6/1936)	0.0019 (58/31285)	0.105219	1	6	PNLIPRP3/RARRES3/FAM84B/HRASLS/PLA2G4B	JMJD7-PLA2G4B
MF	GO:0070976	TIR domain binding	0.0031 (6/1936)	0.0019 (58/31285)	0.105219	1	6	IL18R1/C8orf44-SGK3/TLR2/RASGRP3/TLR4	RP11-47I22.4
BP	GO:0140591	nuclear envelope budding	0.0031 (6/1936)	0.0019 (58/31285)	0.105219	1	6	C8orf44-SGK3/KIAA1033	transcript:ENST00000535501/transcript:ENST00000550053/RP11-47I22.4/transcript:ENST00000426421
BP	GO:1903243	negative regulation of cardiac muscle hypertrophy in response to stress	0.0031 (6/1936)	0.0019 (58/31285)	0.105219	1	6	ATP8B3/VDR/transcript:ENST00000593532/ATP11A	transcript:ENST00000611848/ATP8A1
BP	GO:0150111	regulation of transepithelial transport	0.0031 (6/1936)	0.0019 (58/31285)	0.105219	1	6	CLDN7/transcript:ENST00000554402/ACTG2/CLDN1	transcript:ENST00000572105/transcript:ENST00000425660
BP	GO:0040039	inductive cell migration	0.0031 (6/1936)	0.0019 (58/31285)	0.105219	1	6	SCARF1/transcript:ENST00000393711/gene:ENSG00000259753/transcript:ENST00000525243	transcript:ENST00000367667/transcript:ENST00000526549
MF	GO:0043139	5'-3' DNA helicase activity	0.0031 (6/1936)	0.0019 (58/31285)	0.105219	1	6	HELZ2/transcript:ENST00000482936/DDX60	transcript:ENST00000473015/transcript:ENST00000585057/RTEL1
MF	GO:0044877	protein-containing complex binding	0.1524 (295/1936)	0.1573 (4921/31285)	0.105284	1	295	transcript:ENST00000483665/CTSZ/MX2/RAP1GAP/transcript:ENST00000534320/TRIB3/RP11-385D13.1/transcript:ENST00000577831/TUBA8/HEY1/SESN2/UNC5B/transcript:ENST00000591662/MYO1F/CES1/OSCAR/LRRK1/transcript:ENST00000478046/ADAP2/transcript:ENST00000495733/transcript:ENST00000555259/BTK/KCNIP2/transcript:ENST00000554738/transcript:ENST00000616321/ATP6V0D2/GRASP/NTNG2/transcript:ENST00000576235/ERN1/JUP…	transcript:ENST00000564136/LRRTM4/PLXNA4/transcript:ENST00000382214/SYTL5/CDK15/SLC4A4/transcript:ENST00000479896/transcript:ENST00000482958/CLIC2/NOSTRIN/GOLGA8O/RP11-47I22.4/GABRQ/transcript:ENST00000415933/DDB2/transcript:ENST00000611848/SYTL2/transcript:ENST00000475997/transcript:ENST00000530726/transcript:ENST00000482010/MAP2K3/transcript:ENST00000441989/MPP4/transcript:ENST00000532746/ERCC5…
BP	GO:0060416	response to growth hormone	0.0108 (21/1936)	0.0089 (279/31285)	0.105334	1	21	IRF7/RP11-385D13.1/C1R/C1S/RPS6KA2/IGFBP3/IRF5/IRF8/GDF15/transcript:ENST00000587339/CD36/IGFBP1/transcript:ENST00000533182/C8orf44-SGK3/SRD5A2/IRF9/transcript:ENST00000556575	RP11-47I22.4/PRLR/DHRS9/RDH5
BP	GO:0016480	negative regulation of transcription by RNA polymerase III	0.0026 (5/1936)	0.0014 (45/31285)	0.105903	1	5	transcript:ENST00000409403/transcript:ENST00000413704/transcript:ENST00000431285/transcript:ENST00000616321	transcript:ENST00000334884
BP	GO:0043605	amide catabolic process	0.0026 (5/1936)	0.0014 (45/31285)	0.105903	1	5	ABHD14A-ACY1/transcript:ENST00000452156/transcript:ENST00000480073	transcript:ENST00000536532/transcript:ENST00000580758
BP	GO:1903467	negative regulation of mitotic DNA replication initiation	0.0026 (5/1936)	0.0014 (45/31285)	0.105903	1	5	transcript:ENST00000409403/RP11-385D13.1/CDK18	transcript:ENST00000555408/CDK15
BP	GO:2000342	negative regulation of chemokine (C-X-C motif) ligand 2 production	0.0026 (5/1936)	0.0014 (45/31285)	0.105903	1	5	OAS2/OAS1/OAS3	MAP2K3/KLF17
BP	GO:1904271	L-proline import across plasma membrane	0.0026 (5/1936)	0.0014 (45/31285)	0.105903	1	5	SLC6A9	transcript:ENST00000566598/SLC38A6/transcript:ENST00000549258/SLC38A4
MF	GO:0034480	phosphatidylcholine phospholipase C activity	0.0026 (5/1936)	0.0014 (45/31285)	0.105903	1	5	SMPDL3B/transcript:ENST00000534405	transcript:ENST00000531303/SMPD1/transcript:ENST00000533123
BP	GO:0034378	chylomicron assembly	0.0026 (5/1936)	0.0014 (45/31285)	0.105903	1	5	CES1/CES3/MTTP/MBOAT7	transcript:ENST00000482958
BP	GO:0006574	valine catabolic process	0.0026 (5/1936)	0.0014 (45/31285)	0.105903	1	5	transcript:ENST00000583858/transcript:ENST00000567530/transcript:ENST00000481262	transcript:ENST00000527688/ACADVL
BP	GO:0045705	negative regulation of salivary gland boundary specification	0.0026 (5/1936)	0.0014 (45/31285)	0.105903	1	5	HOXD9/INHBE/GDF15/BMP6	transcript:ENST00000611848
BP	GO:0045839	negative regulation of mitotic nuclear division	0.0062 (12/1936)	0.0046 (143/31285)	0.106402	1	12	NR4A1/INHBE/FLT1/GDF15/BMP6/transcript:ENST00000626154/TRIB3/ESR1/INHBA/ROS1	transcript:ENST00000621217/transcript:ENST00000504875
CC	GO:0031966	mitochondrial membrane	0.0403 (78/1936)	0.0386 (1207/31285)	0.10649	1	78	transcript:ENST00000555840/MX2/SLC7A5/ARHGAP40/transcript:ENST00000591662/LRRK1/RARRES3/transcript:ENST00000615986/transcript:ENST00000523864/BTK/CYP27B1/transcript:ENST00000528110/transcript:ENST00000526129/gene:ENSG00000259529/TNFAIP6/TMX2/HCK/transcript:ENST00000400769/SLC7A7/EHF/GRAMD1A/HERC6/FLI1/PLA2G7/ARHGAP4/transcript:ENST00000472823/transcript:ENST00000583858/IFI6/transcript:ENST0000049…	SYTL5/transcript:ENST00000503915/RP11-47I22.4/SYTL2/transcript:ENST00000482309/JMJD7-PLA2G4B/RDH5/ACADVL/ITK/BBS4/TMTC2/transcript:ENST00000367667/SLC29A2/transcript:ENST00000524972/transcript:ENST00000560014/transcript:ENST00000552635/transcript:ENST00000529403/ELF5/transcript:ENST00000436958/transcript:ENST00000573196/transcript:ENST00000466227/transcript:ENST00000588814/transcript:ENST00000478…
CC	GO:0005641	nuclear envelope lumen	0.0088 (17/1936)	0.0070 (218/31285)	0.106665	1	17	CES1/RARRES3/transcript:ENST00000538239/BRSK2/ALOX5/HRASLS/CES3/TRIB3/transcript:ENST00000626154/ALOXE3/transcript:ENST00000590388/PTGES/GRASP/CYTIP	transcript:ENST00000555609/transcript:ENST00000482958/transcript:ENST00000586810
CC	GO:0005747	obsolete mitochondrial respiratory chain complex I	0.0052 (10/1936)	0.0036 (114/31285)	0.10688	1	10	transcript:ENST00000359944/transcript:ENST00000553837/AC024592.12/transcript:ENST00000557433/transcript:ENST00000474308/transcript:ENST00000592091/NDUFA4L2/transcript:ENST00000419113	transcript:ENST00000527688/transcript:ENST00000593353
CC	GO:0033162	melanosome membrane	0.0052 (10/1936)	0.0036 (114/31285)	0.10688	1	10	transcript:ENST00000536606/SYTL1/SYT7/DBNDD2/transcript:ENST00000635811	transcript:ENST00000389959/SYTL2/transcript:ENST00000436958/SYTL5/OCA2
BP	GO:0051495	positive regulation of cytoskeleton organization	0.0052 (10/1936)	0.0036 (114/31285)	0.10688	1	10	NCF4/IQGAP2/SPTBN5/P2RX7	transcript:ENST00000420627/transcript:ENST00000633485/NOSTRIN/PLXNA4/SEMA4G/transcript:ENST00000573196
BP	GO:0031453	positive regulation of heterochromatin formation	0.0052 (10/1936)	0.0036 (114/31285)	0.10688	1	10	USP18/CDKL3/STAT1/CDK18/ERN1	transcript:ENST00000453535/transcript:ENST00000555408/CDKL5/transcript:ENST00000566631/CDK15
BP	GO:0046513	ceramide biosynthetic process	0.0067 (13/1936)	0.0051 (158/31285)	0.107303	1	13	ALOX5/SMPDL3B/transcript:ENST00000543984/ALOXE3/SMPD3/transcript:ENST00000380189/transcript:ENST00000534405/P2RX7	transcript:ENST00000636494/transcript:ENST00000531303/SMPD1/transcript:ENST00000533123/transcript:ENST00000547787
CC	GO:0031298	replication fork protection complex	0.0036 (7/1936)	0.0023 (72/31285)	0.10822	1	7	HIST2H2BF/transcript:ENST00000618193/transcript:ENST00000612061/HIST1H2BG/HIST2H2BE/transcript:ENST00000621520	transcript:ENST00000566524
BP	GO:0010444	guard mother cell differentiation	0.0036 (7/1936)	0.0023 (72/31285)	0.10822	1	7	CDKL3/CCNO/CDK18	transcript:ENST00000453535/transcript:ENST00000555408/CDKL5/CDK15
BP	GO:0006488	dolichol-linked oligosaccharide biosynthetic process	0.0036 (7/1936)	0.0023 (72/31285)	0.10822	1	7	transcript:ENST00000468657/SRD5A2/transcript:ENST00000411922/transcript:ENST00000492038	transcript:ENST00000580834/transcript:ENST00000571822/transcript:ENST00000576272
BP	GO:0044857	plasma membrane raft organization	0.0046 (9/1936)	0.0032 (100/31285)	0.108372	1	9	transcript:ENST00000580805/ABCA5/ABCA10/transcript:ENST00000636866/MRC1	transcript:ENST00000586995/transcript:ENST00000637871/transcript:ENST00000568422/CHODL
BP	GO:0042104	positive regulation of activated T cell proliferation	0.0046 (9/1936)	0.0032 (100/31285)	0.108372	1	9	EBI3/transcript:ENST00000452281/IGFBP1/IGFBP3/STAT1/IL12A/CD86	transcript:ENST00000530170/transcript:ENST00000530721
BP	GO:0006541	glutamine metabolic process	0.0046 (9/1936)	0.0032 (100/31285)	0.108372	1	9	PCK2/transcript:ENST00000580356/ASNS/transcript:ENST00000454046/transcript:ENST00000480073	GLS/SLC38A6/transcript:ENST00000417154/SLC38A4
CC	GO:0005869	dynactin complex	0.0046 (9/1936)	0.0032 (100/31285)	0.108372	1	9	transcript:ENST00000545307/transcript:ENST00000504325/transcript:ENST00000554402/transcript:ENST00000434055	transcript:ENST00000415891/transcript:ENST00000503494/transcript:ENST00000549394/DCTN1/transcript:ENST00000426421
BP	GO:0072675	osteoclast fusion	0.0041 (8/1936)	0.0027 (86/31285)	0.108986	1	8	NCF4/ADAMTS14/NCF1/transcript:ENST00000529473	transcript:ENST00000468065/transcript:ENST00000508798/transcript:ENST00000530726/transcript:ENST00000526491
BP	GO:0035970	peptidyl-threonine dephosphorylation	0.0041 (8/1936)	0.0027 (86/31285)	0.108986	1	8	SSH3/transcript:ENST00000478046/PPM1D/DNAJC7/DUSP1	transcript:ENST00000532881/transcript:ENST00000588814/transcript:ENST00000392995
BP	GO:2000830	positive regulation of parathyroid hormone secretion	0.0041 (8/1936)	0.0027 (86/31285)	0.108986	1	8	NR1I3/VDR/FLT1/MERTK/transcript:ENST00000593532/ROS1/CYP27B1	transcript:ENST00000504875
BP	GO:0140501	positive regulation of reticulophagy	0.0005 (1/1936)	0.0001 (2/31285)	0.108989	1	1	ERN1
BP	GO:1901069	guanosine-containing compound catabolic process	0.0005 (1/1936)	0.0001 (2/31285)	0.108989	1	1	NT5C3A
MF	GO:0004325	ferrochelatase activity	0.0005 (1/1936)	0.0001 (2/31285)	0.108989	1	1	transcript:ENST00000585494
BP	GO:0090206	negative regulation of cholesterol metabolic process	0.0005 (1/1936)	0.0001 (2/31285)	0.108989	1	1	CH25H
BP	GO:2000828	regulation of parathyroid hormone secretion	0.0005 (1/1936)	0.0001 (2/31285)	0.108989	1	1	GNAL
MF	GO:0061778	obsolete intracellular chloride channel activity	0.0005 (1/1936)	0.0001 (2/31285)	0.108989	1	1		OCA2
MF	GO:0061751	neutral sphingomyelin phosphodiesterase activity	0.0005 (1/1936)	0.0001 (2/31285)	0.108989	1	1	SMPD3
BP	GO:0042501	serine phosphorylation of STAT protein	0.0005 (1/1936)	0.0001 (2/31285)	0.108989	1	1	transcript:ENST00000496808
MF	GO:0017105	acyl-CoA delta11-(Z)-desaturase activity	0.0005 (1/1936)	0.0001 (2/31285)	0.108989	1	1		SCD
BP	GO:0046950	cellular ketone body metabolic process	0.0005 (1/1936)	0.0001 (2/31285)	0.108989	1	1	OXCT2
BP	GO:0051678	pullulan catabolic process	0.0005 (1/1936)	0.0001 (2/31285)	0.108989	1	1	SLC3A2
BP	GO:0003421	growth plate cartilage axis specification	0.0005 (1/1936)	0.0001 (2/31285)	0.108989	1	1	STC2
BP	GO:0106135	negative regulation of cardiac muscle cell contraction	0.0005 (1/1936)	0.0001 (2/31285)	0.108989	1	1	ADCY10
MF	GO:0031216	neopullulanase activity	0.0005 (1/1936)	0.0001 (2/31285)	0.108989	1	1	SLC3A2
MF	GO:0052879	9,12-octadecadienoate 8-hydroperoxide 8S-isomerase activity	0.0005 (1/1936)	0.0001 (2/31285)	0.108989	1	1	PTGS2
BP	GO:0034441	plasma lipoprotein particle oxidation	0.0005 (1/1936)	0.0001 (2/31285)	0.108989	1	1	PLA2G7
MF	GO:0047371	butyrate-acetoacetate CoA-transferase activity	0.0005 (1/1936)	0.0001 (2/31285)	0.108989	1	1	OXCT2
MF	GO:0047569	3-oxoadipate CoA-transferase activity	0.0005 (1/1936)	0.0001 (2/31285)	0.108989	1	1	OXCT2
MF	GO:0004141	dethiobiotin synthase activity	0.0005 (1/1936)	0.0001 (2/31285)	0.108989	1	1		transcript:ENST00000378081
MF	GO:0047658	alpha-amino-acid esterase activity	0.0005 (1/1936)	0.0001 (2/31285)	0.108989	1	1	transcript:ENST00000433912
CC	GO:0005895	interleukin-5 receptor complex	0.0005 (1/1936)	0.0001 (2/31285)	0.108989	1	1	SDCBP2
MF	GO:0140344	triglyceride transfer activity	0.0005 (1/1936)	0.0001 (2/31285)	0.108989	1	1	MTTP
BP	GO:2000465	regulation of glycogen (starch) synthase activity	0.0005 (1/1936)	0.0001 (2/31285)	0.108989	1	1	PPP1R3F
BP	GO:0051790	short-chain fatty acid biosynthetic process	0.0005 (1/1936)	0.0001 (2/31285)	0.108989	1	1	transcript:ENST00000448177
BP	GO:2000897	amylopectin catabolic process	0.0005 (1/1936)	0.0001 (2/31285)	0.108989	1	1	SLC3A2
BP	GO:0034377	plasma lipoprotein particle assembly	0.0005 (1/1936)	0.0001 (2/31285)	0.108989	1	1	MTTP
MF	GO:0062069	GARP complex binding	0.0005 (1/1936)	0.0001 (2/31285)	0.108989	1	1	UHRF1BP1
MF	GO:0008260	succinyl-CoA:3-oxo-acid CoA-transferase activity	0.0005 (1/1936)	0.0001 (2/31285)	0.108989	1	1	OXCT2
BP	GO:0030002	intracellular monoatomic anion homeostasis	0.0005 (1/1936)	0.0001 (2/31285)	0.108989	1	1	STC2
MF	GO:0140432	5'-hydroxyl dinucleotide hydrolase activity	0.0005 (1/1936)	0.0001 (2/31285)	0.108989	1	1	transcript:ENST00000480240
BP	GO:0071449	cellular response to lipid hydroperoxide	0.0005 (1/1936)	0.0001 (2/31285)	0.108989	1	1	PTGES
MF	GO:0052878	linoleate 8R-lipoxygenase activity	0.0005 (1/1936)	0.0001 (2/31285)	0.108989	1	1	PTGS2
MF	GO:0032896	palmitoyl-CoA 9-desaturase activity	0.0005 (1/1936)	0.0001 (2/31285)	0.108989	1	1		SCD
MF	GO:0010854	adenylate cyclase regulator activity	0.0005 (1/1936)	0.0001 (2/31285)	0.108989	1	1	GNAL
BP	GO:0098653	centromere clustering	0.0005 (1/1936)	0.0001 (2/31285)	0.108989	1	1		transcript:ENST00000534532
CC	GO:0045323	interleukin-1 receptor complex	0.0005 (1/1936)	0.0001 (2/31285)	0.108989	1	1		TICAM2
BP	GO:0009158	ribonucleoside monophosphate catabolic process	0.0005 (1/1936)	0.0001 (2/31285)	0.108989	1	1	NT5C3A
CC	GO:0042170	plastid membrane	0.0005 (1/1936)	0.0001 (2/31285)	0.108989	1	1	IL4I1
MF	GO:0005175	CD27 receptor binding	0.0005 (1/1936)	0.0001 (2/31285)	0.108989	1	1		transcript:ENST00000553819
MF	GO:0008788	alpha,alpha-phosphotrehalase activity	0.0005 (1/1936)	0.0001 (2/31285)	0.108989	1	1	SLC3A2
MF	GO:0061928	glutathione specific gamma-glutamylcyclotransferase activity	0.0005 (1/1936)	0.0001 (2/31285)	0.108989	1	1	CHAC1
BP	GO:1904140	negative regulation of microglial cell migration	0.0005 (1/1936)	0.0001 (2/31285)	0.108989	1	1	STAP2
MF	GO:0033934	glucan 1,4-alpha-maltotriohydrolase activity	0.0005 (1/1936)	0.0001 (2/31285)	0.108989	1	1	SLC3A2
MF	GO:0043897	glucan 1,4-alpha-maltohydrolase activity	0.0005 (1/1936)	0.0001 (2/31285)	0.108989	1	1	SLC3A2
MF	GO:0102843	palmitoyl-[glycerolipid] 7-desaturase activity	0.0005 (1/1936)	0.0001 (2/31285)	0.108989	1	1		SCD
MF	GO:0102657	obsolete 1-18:1-2-16:0-monogalactosyldiacylglycerol palmitoyl-lipid 7-desaturase activity	0.0005 (1/1936)	0.0001 (2/31285)	0.108989	1	1		SCD
MF	GO:0160101	tRNA (guanine(10)-N2)-dimethyltransferase activity	0.0005 (1/1936)	0.0001 (2/31285)	0.108989	1	1	transcript:ENST00000479748
BP	GO:0097601	retina blood vessel maintenance	0.0005 (1/1936)	0.0001 (2/31285)	0.108989	1	1		NDP
CC	GO:0043680	filiform apparatus	0.0005 (1/1936)	0.0001 (2/31285)	0.108989	1	1	IRAK3
MF	GO:0120243	2-iminopropanoate deaminase activity	0.0005 (1/1936)	0.0001 (2/31285)	0.108989	1	1		transcript:ENST00000522791
MF	GO:0120242	2-iminobutanoate deaminase activity	0.0005 (1/1936)	0.0001 (2/31285)	0.108989	1	1		transcript:ENST00000522791
BP	GO:1903403	negative regulation of renal phosphate excretion	0.0005 (1/1936)	0.0001 (2/31285)	0.108989	1	1	STC2
BP	GO:0052704	ergothioneine biosynthesis from histidine via gamma-glutamyl-hercynylcysteine sulfoxide	0.0005 (1/1936)	0.0001 (2/31285)	0.108989	1	1		transcript:ENST00000448413
MF	GO:0008887	glycerate kinase activity	0.0005 (1/1936)	0.0001 (2/31285)	0.108989	1	1	GLYCTK
MF	GO:0008881	glutamate racemase activity	0.0005 (1/1936)	0.0001 (2/31285)	0.108989	1	1	CTH
BP	GO:0002668	negative regulation of T cell anergy	0.0005 (1/1936)	0.0001 (2/31285)	0.108989	1	1	CD86
BP	GO:2000025	regulation of leaf formation	0.0005 (1/1936)	0.0001 (2/31285)	0.108989	1	1	transcript:ENST00000519261
BP	GO:0033359	lysine biosynthetic process via diaminopimelate and N-succinyl-2-amino-6-ketopimelate	0.0005 (1/1936)	0.0001 (2/31285)	0.108989	1	1	PSAT1
MF	GO:0036311	chitin disaccharide deacetylase activity	0.0005 (1/1936)	0.0001 (2/31285)	0.108989	1	1	YDJC
BP	GO:1905025	negative regulation of membrane repolarization during ventricular cardiac muscle cell action potential	0.0005 (1/1936)	0.0001 (2/31285)	0.108989	1	1	KCNE3
MF	GO:0016215	acyl-CoA desaturase activity	0.0005 (1/1936)	0.0001 (2/31285)	0.108989	1	1		SCD
MF	GO:0031770	growth hormone-releasing hormone receptor binding	0.0005 (1/1936)	0.0001 (2/31285)	0.108989	1	1	VIP
MF	GO:0033781	cholesterol 24-hydroxylase activity	0.0005 (1/1936)	0.0001 (2/31285)	0.108989	1	1		transcript:ENST00000554611
BP	GO:0046352	disaccharide catabolic process	0.0005 (1/1936)	0.0001 (2/31285)	0.108989	1	1	SLC3A2
BP	GO:0016120	carotene biosynthetic process	0.0005 (1/1936)	0.0001 (2/31285)	0.108989	1	1	IL4I1
BP	GO:0033468	CMP-keto-3-deoxy-D-manno-octulosonic acid biosynthetic process	0.0005 (1/1936)	0.0001 (2/31285)	0.108989	1	1	transcript:ENST00000534981
BP	GO:0038111	interleukin-7-mediated signaling pathway	0.0005 (1/1936)	0.0001 (2/31285)	0.108989	1	1	IL2RG
MF	GO:0051060	pullulanase activity	0.0005 (1/1936)	0.0001 (2/31285)	0.108989	1	1	SLC3A2
BP	GO:1904312	cellular response to gold(3+)	0.0005 (1/1936)	0.0001 (2/31285)	0.108989	1	1	PPP1R15A
BP	GO:1904310	cellular response to cordycepin	0.0005 (1/1936)	0.0001 (2/31285)	0.108989	1	1	PPP1R15A
BP	GO:1904308	cellular response to desipramine	0.0005 (1/1936)	0.0001 (2/31285)	0.108989	1	1	PPP1R15A
BP	GO:1904314	cellular response to methamphetamine hydrochloride	0.0005 (1/1936)	0.0001 (2/31285)	0.108989	1	1	PPP1R15A
MF	GO:0047888	fatty acid peroxidase activity	0.0005 (1/1936)	0.0001 (2/31285)	0.108989	1	1	PTGS2
MF	GO:0047798	cyclomaltodextrinase activity	0.0005 (1/1936)	0.0001 (2/31285)	0.108989	1	1	SLC3A2
CC	GO:0031511	Mis6-Sim4 complex	0.0005 (1/1936)	0.0001 (2/31285)	0.108989	1	1		CENPI
MF	GO:0102985	delta12-fatty-acid desaturase activity	0.0005 (1/1936)	0.0001 (2/31285)	0.108989	1	1		SCD
MF	GO:0050480	imidazolonepropionase activity	0.0005 (1/1936)	0.0001 (2/31285)	0.108989	1	1		AMDHD1
MF	GO:0003885	D-arabinono-1,4-lactone oxidase activity	0.0005 (1/1936)	0.0001 (2/31285)	0.108989	1	1	transcript:ENST00000400769
BP	GO:1903914	negative regulation of fusion of virus membrane with host plasma membrane	0.0005 (1/1936)	0.0001 (2/31285)	0.108989	1	1	CH25H
BP	GO:1903917	obsolete obsolete positive regulation of endoplasmic reticulum stress-induced eIF2 alpha dephosphorylation	0.0005 (1/1936)	0.0001 (2/31285)	0.108989	1	1	PPP1R15A
BP	GO:0031555	transcriptional attenuation	0.0005 (1/1936)	0.0001 (2/31285)	0.108989	1	1	DHX58
MF	GO:0044875	gamma-glutamyl hercynylcysteine sulfoxide synthase activity	0.0005 (1/1936)	0.0001 (2/31285)	0.108989	1	1		transcript:ENST00000448413
BP	GO:0030961	peptidyl-arginine hydroxylation	0.0005 (1/1936)	0.0001 (2/31285)	0.108989	1	1		transcript:ENST00000378081
MF	GO:0034353	mRNA 5'-diphosphatase activity	0.0005 (1/1936)	0.0001 (2/31285)	0.108989	1	1	transcript:ENST00000480240
BP	GO:0052777	diacetylchitobiose catabolic process	0.0005 (1/1936)	0.0001 (2/31285)	0.108989	1	1	YDJC
MF	GO:0004755	saccharopine dehydrogenase (NADP+, L-glutamate-forming) activity	0.0005 (1/1936)	0.0001 (2/31285)	0.108989	1	1	transcript:ENST00000358954
MF	GO:0050303	lysine 6-dehydrogenase activity	0.0005 (1/1936)	0.0001 (2/31285)	0.108989	1	1	transcript:ENST00000358954
MF	GO:0004014	adenosylmethionine decarboxylase activity	0.0005 (1/1936)	0.0001 (2/31285)	0.108989	1	1		transcript:ENST00000451850
BP	GO:0051053	negative regulation of DNA metabolic process	0.0005 (1/1936)	0.0001 (2/31285)	0.108989	1	1	transcript:ENST00000511615
MF	GO:0052773	diacetylchitobiose deacetylase activity	0.0005 (1/1936)	0.0001 (2/31285)	0.108989	1	1	YDJC
BP	GO:0046107	uracil biosynthetic process	0.0005 (1/1936)	0.0001 (2/31285)	0.108989	1	1	transcript:ENST00000479719
MF	GO:0008690	3-deoxy-manno-octulosonate cytidylyltransferase activity	0.0005 (1/1936)	0.0001 (2/31285)	0.108989	1	1	transcript:ENST00000534981
MF	GO:0106142	rRNA (adenine-N1-)-methyltransferase activity	0.0005 (1/1936)	0.0001 (2/31285)	0.108989	1	1		transcript:ENST00000533907
MF	GO:0016892	RNA endonuclease activity, producing 3'-phosphomonoesters	0.0005 (1/1936)	0.0001 (2/31285)	0.108989	1	1		transcript:ENST00000522791
MF	GO:0042277	peptide binding	0.0243 (47/1936)	0.0223 (697/31285)	0.110205	1	47	NR1I3/VDR/CTSZ/ANPEP/ESR1/HLA-F/LRRC2/ULBP1/RP11-295K3.1/transcript:ENST00000547173/ECM2/LRRK1/RPS6KA2/transcript:ENST00000472580/IRAK3/HLA-C/KCNJ3/transcript:ENST00000269361/NR4A1/transcript:ENST00000464497/transcript:ENST00000539881/CTSH/CMKLR1/C8orf44-SGK3/transcript:ENST00000610164/transcript:ENST00000593532/GPR1/transcript:ENST00000590388/transcript:ENST00000556575/transcript:ENST00000549098…	transcript:ENST00000472940/CSRP3/transcript:ENST00000586810/GIPR/BBS4/TMTC2/transcript:ENST00000478361/transcript:ENST00000555609/RP11-47I22.4/transcript:ENST00000547475/transcript:ENST00000571451/transcript:ENST00000415933/transcript:ENST00000382240/transcript:ENST00000617103/transcript:ENST00000510734/transcript:ENST00000568004
CC	GO:0032937	SREBP-SCAP-Insig complex	0.0015 (3/1936)	0.0007 (21/31285)	0.110363	1	3	transcript:ENST00000424354/transcript:ENST00000441517	PTCH1
BP	GO:0007540	sex determination, establishment of X:A ratio	0.0015 (3/1936)	0.0007 (21/31285)	0.110363	1	3	HEY1/RUNX3/HES1
BP	GO:0019516	obsolete lactate oxidation	0.0015 (3/1936)	0.0007 (21/31285)	0.110363	1	3	transcript:ENST00000545215/PCK2	LDHA
BP	GO:1990822	basic amino acid transmembrane transport	0.0015 (3/1936)	0.0007 (21/31285)	0.110363	1	3	SLC7A7/SLC7A11/SLC7A5
BP	GO:1905601	negative regulation of receptor-mediated endocytosis involved in cholesterol transport	0.0015 (3/1936)	0.0007 (21/31285)	0.110363	1	3	ABCA5/ABCA10	transcript:ENST00000586995
MF	GO:0036487	nitric-oxide synthase inhibitor activity	0.0015 (3/1936)	0.0007 (21/31285)	0.110363	1	3	ATP11A/ATP8B3	ATP8A1
BP	GO:0060094	positive regulation of synaptic transmission, glycinergic	0.0015 (3/1936)	0.0007 (21/31285)	0.110363	1	3	SLC7A7/SLC7A11/SLC7A5
MF	GO:0046623	sphingolipid floppase activity	0.0015 (3/1936)	0.0007 (21/31285)	0.110363	1	3	ABCA5/ABCA10	transcript:ENST00000586995
BP	GO:0035305	negative regulation of dephosphorylation	0.0015 (3/1936)	0.0007 (21/31285)	0.110363	1	3	IQGAP2/INPP5J	transcript:ENST00000633485
BP	GO:0099174	regulation of presynapse organization	0.0015 (3/1936)	0.0007 (21/31285)	0.110363	1	3	CES1/CES3	transcript:ENST00000482958
BP	GO:0097115	neurexin clustering involved in presynaptic membrane assembly	0.0015 (3/1936)	0.0007 (21/31285)	0.110363	1	3	CES1/CES3	transcript:ENST00000482958
BP	GO:0003336	corneocyte desquamation	0.0015 (3/1936)	0.0007 (21/31285)	0.110363	1	3	ABCA5/ABCA10	transcript:ENST00000586995
MF	GO:0034188	apolipoprotein A-I receptor activity	0.0015 (3/1936)	0.0007 (21/31285)	0.110363	1	3	ABCA5/ABCA10	transcript:ENST00000586995
CC	GO:0043527	tRNA methyltransferase complex	0.0015 (3/1936)	0.0007 (21/31285)	0.110363	1	3	transcript:ENST00000432522	DHRS9/RDH5
MF	GO:0022829	wide pore channel activity	0.0015 (3/1936)	0.0007 (21/31285)	0.110363	1	3	GSDMB/MPEG1	transcript:ENST00000524039
BP	GO:1905395	response to flavonoid	0.0015 (3/1936)	0.0007 (21/31285)	0.110363	1	3	MX2/MX1/transcript:ENST00000357390
BP	GO:0090666	scaRNA localization to Cajal body	0.0015 (3/1936)	0.0007 (21/31285)	0.110363	1	3	transcript:ENST00000550010	transcript:ENST00000538530/CCT2
BP	GO:0035193	larval central nervous system remodeling	0.0015 (3/1936)	0.0007 (21/31285)	0.110363	1	3	transcript:ENST00000593532/NR1I3/VDR
MF	GO:0003917	DNA topoisomerase type I (single strand cut, ATP-independent) activity	0.0015 (3/1936)	0.0007 (21/31285)	0.110363	1	3	transcript:ENST00000457179	transcript:ENST00000584582/transcript:ENST00000582981
BP	GO:0010067	procambium histogenesis	0.0015 (3/1936)	0.0007 (21/31285)	0.110363	1	3	LRRC2/INPP5J	transcript:ENST00000568004
BP	GO:0044248	cellular catabolic process	0.0015 (3/1936)	0.0007 (21/31285)	0.110363	1	3	CES1/CES3	transcript:ENST00000482958
MF	GO:0106439	L-lysine:L-arginine antiporter activity	0.0015 (3/1936)	0.0007 (21/31285)	0.110363	1	3	SLC7A7/SLC7A11/SLC7A5
BP	GO:2000143	negative regulation of DNA-templated transcription initiation	0.0015 (3/1936)	0.0007 (21/31285)	0.110363	1	3	transcript:ENST00000593532/NR1I3/VDR
BP	GO:0036149	phosphatidylinositol acyl-chain remodeling	0.0015 (3/1936)	0.0007 (21/31285)	0.110363	1	3	PLA2G4B/MBOAT7	JMJD7-PLA2G4B
CC	GO:0097002	mitochondrial inner boundary membrane	0.0015 (3/1936)	0.0007 (21/31285)	0.110363	1	3	MX2/transcript:ENST00000569820/MX1
CC	GO:0005832	chaperonin-containing T-complex	0.0015 (3/1936)	0.0007 (21/31285)	0.110363	1	3	transcript:ENST00000550010	transcript:ENST00000538530/CCT2
BP	GO:0000956	nuclear-transcribed mRNA catabolic process	0.0062 (12/1936)	0.0046 (144/31285)	0.110498	1	12	transcript:ENST00000480240/transcript:ENST00000507392/HELZ2/DDX3Y/transcript:ENST00000600289/transcript:ENST00000534269/transcript:ENST00000498479/transcript:ENST00000547173	transcript:ENST00000527613/transcript:ENST00000547475/transcript:ENST00000388749/LSM4
BP	GO:0050830	defense response to Gram-positive bacterium	0.0408 (79/1936)	0.0392 (1227/31285)	0.11099	1	79	MYO1F/SERPINB2/CARD9/BTK/FPR3/IL1RN/IL18R1/JUP/TLR4/MMP12/HIST1H2BG/GBP5/transcript:ENST00000539881/LGALS9/INHBE/KRT81/MYO15B/C5AR1/IL4I1/PTX3/TFEC/PTGS2/TNFAIP6/TNFSF8/HLA-C/transcript:ENST00000541960/KRT75/MPEG1/HCK/transcript:ENST00000325960/TLR2/PSTPIP1/IL1B/IL6/TNF/transcript:ENST00000588198/ULBP1/HIST1H2AG/transcript:ENST00000540424/DHX58/HIST2H2BF/CLEC12A/transcript:ENST00000570856/BMP6/CD…	transcript:ENST00000503915/MAP2K3/CD6/ITK/transcript:ENST00000561139/transcript:ENST00000382240/SCD/transcript:ENST00000485036/CSMD3/transcript:ENST00000571451
CC	GO:0000786	nucleosome	0.0145 (28/1936)	0.0125 (391/31285)	0.111096	1	28	HIST2H3A/IRF7/transcript:ENST00000534320/HIST1H2AG/transcript:ENST00000558084/transcript:ENST00000618193/transcript:ENST00000314088/transcript:ENST00000495733/transcript:ENST00000419525/IRF5/IRF8/HIST2H2BF/transcript:ENST00000558357/transcript:ENST00000612061/HIST1H2BG/HIST2H3C/transcript:ENST00000621520/transcript:ENST00000533182/PARP9/HIST2H2BE/IRF9/transcript:ENST00000588732	transcript:ENST00000447802/transcript:ENST00000585057/transcript:ENST00000572105/transcript:ENST00000512140/KMT2C/transcript:ENST00000425660
CC	GO:0033181	plasma membrane proton-transporting V-type ATPase complex	0.0021 (4/1936)	0.0011 (33/31285)	0.111177	1	4	ATP6V0D2/transcript:ENST00000376185/transcript:ENST00000561852	transcript:ENST00000554087
BP	GO:2000099	regulation of establishment or maintenance of bipolar cell polarity	0.0021 (4/1936)	0.0011 (33/31285)	0.111177	1	4	transcript:ENST00000409403/CDK18	CDK15/transcript:ENST00000555408
MF	GO:0035368	selenocysteine insertion sequence binding	0.0021 (4/1936)	0.0011 (33/31285)	0.111177	1	4	gene:ENSG00000255663/transcript:ENST00000443963	transcript:ENST00000533164/transcript:ENST00000542140
BP	GO:0045168	cell-cell signaling involved in cell fate commitment	0.0021 (4/1936)	0.0011 (33/31285)	0.111177	1	4	GDF15/INHBE/BMP6/INHBA
MF	GO:0140803	NAD+-protein-cysteine ADP-ribosyltransferase activity	0.0021 (4/1936)	0.0011 (33/31285)	0.111177	1	4	transcript:ENST00000567440/PARP9/transcript:ENST00000565443	transcript:ENST00000458162
MF	GO:0031728	CCR3 chemokine receptor binding	0.0021 (4/1936)	0.0011 (33/31285)	0.111177	1	4	CCL8/CCL7/CCL20/CCL3
CC	GO:0099143	presynaptic actin cytoskeleton	0.0021 (4/1936)	0.0011 (33/31285)	0.111177	1	4	transcript:ENST00000554402/ACTG2	transcript:ENST00000572105/transcript:ENST00000425660
BP	GO:0016078	tRNA decay	0.0021 (4/1936)	0.0011 (33/31285)	0.111177	1	4	transcript:ENST00000357464/DDX60/DHX58/IFIH1
BP	GO:0044523	envenomation resulting in damage of muscle extracellular matrix in another organism	0.0021 (4/1936)	0.0011 (33/31285)	0.111177	1	4	ADAMTS14/transcript:ENST00000529473	transcript:ENST00000526491/transcript:ENST00000468065
BP	GO:0035910	ascending aorta morphogenesis	0.0021 (4/1936)	0.0011 (33/31285)	0.111177	1	4	HEY1/HES1/GDF15	SOX7
BP	GO:0071031	nuclear mRNA surveillance of mRNA 3'-end processing	0.0021 (4/1936)	0.0011 (33/31285)	0.111177	1	4	transcript:ENST00000357464/DDX60/HELZ2/EXOSC6
MF	GO:0016312	inositol bisphosphate phosphatase activity	0.0021 (4/1936)	0.0011 (33/31285)	0.111177	1	4	INPP5J/MTMR10/MTMR1/transcript:ENST00000530200
CC	GO:0035859	Seh1-associated complex	0.0021 (4/1936)	0.0011 (33/31285)	0.111177	1	4	transcript:ENST00000431926	transcript:ENST00000418825/transcript:ENST00000451194/transcript:ENST00000433381
CC	GO:0120220	basal body patch	0.0021 (4/1936)	0.0011 (33/31285)	0.111177	1	4	transcript:ENST00000554402/ACTG2	transcript:ENST00000572105/transcript:ENST00000425660
MF	GO:0004958	prostaglandin F receptor activity	0.0021 (4/1936)	0.0011 (33/31285)	0.111177	1	4	C5AR1/FPR3/GPR1/CMKLR1
BP	GO:1902424	negative regulation of attachment of mitotic spindle microtubules to kinetochore	0.0021 (4/1936)	0.0011 (33/31285)	0.111177	1	4	transcript:ENST00000409403/CDK18	CDK15/transcript:ENST00000555408
BP	GO:0015823	phenylalanine transport	0.0021 (4/1936)	0.0011 (33/31285)	0.111177	1	4	SLC3A2/SLC7A7/SLC7A11/SLC7A5
BP	GO:1990169	stress response to copper ion	0.0021 (4/1936)	0.0011 (33/31285)	0.111177	1	4	CTSH/SLC7A11/CTSZ	MAP2K3
BP	GO:0062026	negative regulation of SCF-dependent proteasomal ubiquitin-dependent catabolic process	0.0021 (4/1936)	0.0011 (33/31285)	0.111177	1	4	SSH3/DUSP1	transcript:ENST00000532881/BCL2L2-PABPN1
BP	GO:1900006	positive regulation of dendrite development	0.0150 (29/1936)	0.0130 (407/31285)	0.111383	1	29	transcript:ENST00000538239/PTX3/MX2/ROS1/RBMS3/IQGAP2/transcript:ENST00000311943/BTK/transcript:ENST00000445387/INHBA/transcript:ENST00000434055/PTPRO/GDF15/BMP6/HCK/gene:ENSG00000268400/SLA/INHBE/MERTK/PSTPIP1/MX1	DCTN1/ITK/transcript:ENST00000478793/transcript:ENST00000479896/transcript:ENST00000415891/SYNGAP1/transcript:ENST00000633485/KMT2C
BP	GO:0044027	negative regulation of gene expression via chromosomal CpG island methylation	0.0072 (14/1936)	0.0056 (174/31285)	0.111404	1	14	transcript:ENST00000563961/USP18/transcript:ENST00000558357/transcript:ENST00000576863/ZNF396/transcript:ENST00000534320/transcript:ENST00000334075/KRBOX1/transcript:ENST00000591278	transcript:ENST00000461221/transcript:ENST00000592705/transcript:ENST00000423973/transcript:ENST00000468435/transcript:ENST00000576500
BP	GO:0050688	regulation of defense response to virus	0.0124 (24/1936)	0.0105 (328/31285)	0.111446	1	24	TRIB3/DDX3Y/transcript:ENST00000475126/transcript:ENST00000507392/IFIH1/DHX58/BRSK2/TLR4/GBP5/transcript:ENST00000626154/PPM1D/RBM39/GBP4/transcript:ENST00000502762/HERC6/transcript:ENST00000514671	transcript:ENST00000335760/LRRTM4/transcript:ENST00000630114/transcript:ENST00000533164/transcript:ENST00000484566/transcript:ENST00000338163/transcript:ENST00000530726/transcript:ENST00000392995
BP	GO:0045851	pH reduction	0.0052 (10/1936)	0.0037 (115/31285)	0.111526	1	10	transcript:ENST00000610164/transcript:ENST00000561852/transcript:ENST00000425141/transcript:ENST00000635734/transcript:ENST00000376185/ATP6V0D2/transcript:ENST00000636787	transcript:ENST00000554087/SLC4A4/SLC4A3
[truncated: 14,655 more rows]
