# Supplementary material for: A Chimeric Oncolytic Adenovirus Carried by Macrophages for Glioma Immunotherapy
Source: Research Square preprint supplement (doi:10.21203/rs.3.rs-6291711/v1), 2025-04-01
Supplement: Supplementary file 2 [file 11fada4b223e878cfd66c54a.xlsx]

## Sheet: Sheet1
Sequencing Coverage and Quality Statistics
Sample ID	Total number of sequenced reads	Total number of uniquely mapped reads	RNA integrity number (RIN)	Ratio of all reads aligned to rRNA regions to total uniquely mapped reads (rRNA rate)	Ratio of exon-mapped reads to total uniquely mapped reads (Expression Profile Efficiency)	Total number of detected transcripts with reads ≥1b
UM	51575278	41630769		0.849	0.96	44023764
UMV	40416852	31787316		0.859	0.9587	34915794
