# Supplementary material for: A Chimeric Oncolytic Adenovirus Carried by Macrophages for Glioma Immunotherapy
Source: Research Square preprint supplement (doi:10.21203/rs.3.rs-6291711/v1), 2025-04-01
Supplement: Supplementary file 3 [file 2a1a230f666713da689e772d.docx]

Transcriptome Analysis Quality Report

1. Project Overview

1.1 Project Information

Key Contract Indicators:

- Completed transcriptome analysis for two samples.
- Conducted expression analysis, differential expression analysis, GO enrichment analysis, KEGG enrichment analysis, GSEA enrichment analysis, alternative splicing analysis, variant detection analysis, novel gene annotation, transcription factor analysis, and time-series analysis.

Summary of Analysis Results:

- A total of 2 samples were sequenced, generating 11.78 Gb of data.
- The Q30 base percentage was 92.91% or higher.
- Clean reads were aligned to the reference genome, with mapping efficiency ranging from 94.38% to 97.32%.
- 353 novel genes were detected, with 308 of them annotated with functional information.
- Differentially expressed genes were identified based on expression levels in different samples.
- SNP and INDEL variants were detected using GATK software.

1.2 Project Background

Transcriptome refers to the complete set of RNA molecules transcribed by a specific tissue or cell at a specific time or condition, including messenger RNA (mRNA), ribosomal RNA (rRNA), transfer RNA (tRNA), and non-coding RNA. In a narrower sense, it specifically refers to all mRNA molecules.

RNA sequencing (RNA-seq) is a high-throughput sequencing technique that profiles all mRNA transcripts under specific conditions. It not only enables mRNA expression profiling but also allows the identification of alternative splicing events, gene fusions, and structural variations.

As a key component of the central dogma, RNA carries genetic and regulatory information, reflecting the cellular state. High-throughput sequencing has made it possible for RNA molecules to serve as biomarkers for disease diagnosis and prognosis, with mRNA research being the most extensively studied area.

Species: *Homo sapiens*
Reference Genome: GRCh38.87

2. Basic Analysis

2.1 Raw Data Quality Control

2.1.1 Sequencing Data and Quality Control

High-throughput sequencing (e.g., Illumina HiSeq) generates raw image data files, which are converted into raw sequence data (Raw Data) through base calling (CASAVA). The sequencing results are stored in FASTQ format, containing both sequence and corresponding quality score information.

Each read in a FASTQ file consists of four lines:

1. Read Identifier (starts with "@")
2. Nucleotide Sequence
3. Separator Line (starts with "+")
4. Quality Scores (encoded as ASCII characters)

2.1.2 Base Quality Scores

The quality score (Q-score) represents the error probability of base calling, typically using the Phred quality score formula:

Q=−10log⁡10PQ = -10 \log_{10} PQ=−10log10​P

where P is the probability of an incorrect base call. A higher Q-score indicates greater sequencing accuracy.

For example:

- Q20 means a 1% error rate (1 error per 100 bases).
- Q30 means a 0.1% error rate (1 error per 1000 bases).

Sequencing errors can be influenced by factors such as sequencing platform, reagent quality, and sample integrity.

Common characteristics of Illumina sequencing error rates:

1. Error rate increases with sequencing length due to signal decay.
2. Higher error rates at the beginning of reads due to slower autofocus in the early sequencing cycles.

2.1.3 GC Content Distribution

- Base content distribution analysis detects potential AT/GC separation bias.
- In randomly fragmented cDNA sequencing, A/T and G/C content should ideally be balanced across sequencing cycles.

2.1.4 Filtering of Sequencing Data

After obtaining raw data, low-quality reads were filtered based on the following criteria:

1. Removal of reads shorter than 100 bp after trimming adapter sequences and low-quality bases.
2. Removal of reads with over 10 ambiguous bases ("N").
3. Removal of reads with >40% bases having Q-scores ≤ 30.

Data Summary:

| Sample | Raw Reads | Raw Bases (bp) | Clean Reads | Clean Bases (bp) | Effective Rate (%) | GC Content (%) | Q20 (%) | Q30 (%) |
| --- | --- | --- | --- | --- | --- | --- | --- | --- |
| UM | 51,575,278 | 7,736,291,700 | 44,023,764 | 6,567,463,825 | 84.89% | 49.17% | 97.88% | 92.91% |
| UMV | 40,416,852 | 6,062,527,800 | 34,915,794 | 5,210,509,460 | 85.95% | 50.45% | 97.90% | 93.15% |

2.2 Genome Alignment

HISAT2 was used to align clean reads to the GRCh38.87 reference genome, obtaining genomic mapping information and sequencing-specific characteristics.

HISAT2, developed by Johns Hopkins University, replaces Bowtie/TopHat and provides:

- Fast and accurate alignment of RNA-seq reads.
- Accurate mapping of reads spanning multiple exons.
- Better gene reconstruction and expression estimation when combined with StringTie.

2.2.1 Mapping Efficiency Statistics

Mapping efficiency represents the percentage of clean reads successfully aligned to the reference genome, which reflects the reliability of downstream analyses.

| Sample | Total Reads | Mapped Reads | Mapped Rate (%) | Unique Mapped Reads | Unique Mapped Rate (%) | Multiple Mapped Reads | Multiple Mapped Rate (%) | Unmapped Reads | Unmapped Rate (%) |
| --- | --- | --- | --- | --- | --- | --- | --- | --- | --- |
| UM | 44,023,764 | 42,845,679 | 97.32% | 41,630,769 | 94.56% | 1,214,910 | 2.76% | 2,023,520 | 2.68% |
| UMV | 34,915,794 | 32,952,944 | 94.38% | 31,787,316 | 91.04% | 1,165,628 | 3.34% | 2,611,932 | 5.62% |
