# Supplementary material for: A Chimeric Oncolytic Adenovirus Carried by Macrophages for Glioma Immunotherapy
Source: Research Square preprint supplement (doi:10.21203/rs.3.rs-6291711/v1), 2025-04-01
Supplement: Supplementary file 4 [file 7e2b296a7f8680f75e2e9345.xlsx]

## Sheet: Sheet1
GeneID	Symbol	fpkmMean	log2FoldChange	pvalue	padj	regulated	UMV (FPKM)	UM (FPKM)	UMV (Count)	UM (Count)	go_id	go_class	go_description	KO_id	pathway_id	pathway_description	nr	pfam_id	pfam_description	swiss	eggNOG_group	eggNOG_class	eggNOG_function	COGID	COGName	COGFunctionalCategory	COGFunctionalCategoryDescription	KOGName	KOGFuncCode	KOGFuncCategories	KOGFuncDescription	TransFactor	key
transcript:ENST00000545215	transcript:ENST00000545215	4.79545	18.0599	5.48014e-237	8.53257e-233	up	770.165	0	29917	0	GO:0001889;GO:0070062;GO:0042867;GO:0051287;GO:0021762;GO:0005743;GO:0019674;GO:0005739;GO:0019516;GO:1990204;GO:0006754;GO:0035686;GO:0045296;GO:0045121;GO:0005759;GO:0006090;GO:0019661;GO:0043627;GO:0006089;GO:0030317;GO:0005737;GO:0005634;GO:0009410;GO:0016020;GO:0006096;GO:0007519;GO:0014070;GO:0001666;GO:0042802;GO:0019244;GO:0005929;GO:0005212;GO:0043065;GO:0009749;GO:0042542;GO:0043209;GO:…	BP;CC;BP;MF;BP;CC;BP;CC;BP;CC;BP;CC;MF;CC;CC;BP;BP;BP;BP;BP;CC;CC;BP;CC;BP;BP;BP;BP;MF;BP;CC;MF;BP;BP;BP;CC;MF;CC;BP;BP;MF;CC;BP;MF;BP;	liver development;extracellular exosome;pyruvate catabolic process;NAD binding;substantia nigra development;mitochondrial inner membrane;NAD metabolic process;mitochondrion;obsolete lactate oxidation;oxidoreductase complex;ATP biosynthetic process;sperm fibrous sheath;cadherin binding;membrane raft;mitochondrial matrix;pyruvate metabolic process;glucose catabolic process to lactate via pyruvate;r…	K00016	ko00010;ko05230;ko00640;ko00620;ko04922;ko04066;ko01100;ko00270	Glycolysis / Gluconeogenesis;Central carbon metabolism in cancer;Propanoate metabolism;Pyruvate metabolism;Glucagon signaling pathway;HIF-1 signaling pathway;Metabolic pathways;Cysteine and methionine metabolism	L-lactate dehydrogenase A chain-like [Microcebus murinus]	PF00056.27	lactate/malate dehydrogenase, NAD binding domain	L-lactate dehydrogenase A chain OS=Homo sapiens OX=9606 GN=LDHA PE=1 SV=2	4N3NK	C	L-lactate dehydrogenase activity	-	-	-	-	KOG1495	[C]	Energy production and conversion;	Lactate dehydrogenase	-	row-0
transcript:ENST00000561139	transcript:ENST00000561139	4.14504	-15.8778	8.31027e-167	6.46954e-163	down	0	312.013	0	8461	GO:0005788;GO:0035580;GO:0042613;GO:0071283;GO:1900122;GO:0012507;GO:0003254;GO:0044877;GO:0042130;GO:0031625;GO:0005771;GO:0006879;GO:0009897;GO:0051289;GO:0016020;GO:0009986;GO:1904434;GO:0002827;GO:0071315;GO:0002344;GO:0015643;GO:0046635;GO:0001916;GO:0031902;GO:0042026;GO:0001772;GO:0050778;GO:0002579;GO:0050870;GO:0002481;GO:0019882;GO:0005783;GO:0050829;GO:0042102;GO:1904437;GO:0030670;GO:…	CC;CC;CC;BP;BP;CC;BP;MF;BP;MF;CC;BP;CC;BP;CC;CC;BP;BP;BP;BP;MF;BP;BP;CC;BP;CC;BP;BP;BP;BP;BP;CC;BP;BP;BP;CC;BP;CC;BP;MF;BP;CC;BP;BP;BP;CC;MF;CC;BP;BP;BP;CC;BP;MF;BP;CC;BP;BP;BP;CC;MF;CC;BP;BP;MF;MF;BP;BP;BP;BP;BP;BP;BP;BP;MF;BP;CC;BP;CC;CC;CC;BP;MF;BP;CC;BP;BP;BP;CC;BP;CC;CC;BP;MF;CC;BP;CC;BP;BP;BP;CC;BP;BP;BP;BP;MF;BP;CC;BP;CC;BP;BP;CC;BP;	endoplasmic reticulum lumen;specific granule lumen;MHC class II protein complex;cellular response to iron(III) ion;positive regulation of receptor binding;ER to Golgi transport vesicle membrane;regulation of membrane depolarization;protein-containing complex binding;negative regulation of T cell proliferation;ubiquitin protein ligase binding;multivesicular body;intracellular iron ion homeostasis;…	K08055	ko05169;ko05168;ko05170;ko04612;ko05163;ko05166	Epstein-Barr virus infection;Herpes simplex virus 1 infection;Human immunodeficiency virus 1 infection;Antigen processing and presentation;Human cytomegalovirus infection;Human T-cell leukemia virus 1 infection	beta-2-microglobulin precursor [Homo sapiens]	PF07654.19	Immunoglobulin C1-set domain	Beta-2-microglobulin OS=Pongo pygmaeus OX=9600 GN=B2M PE=1 SV=2	4N6R3	W	antigen processing and presentation of exogenous protein antigen via MHC class Ib, TAP-dependent	-	-	-	-	-	-	-	-	-	row-1
transcript:ENST00000420627	transcript:ENST00000420627	2.39539	-15.8501	5.43802e-166	2.82233e-162	down	0	26.6801	0	8300	GO:0044295;GO:0099536;GO:0051693;GO:0090521;GO:0072659;GO:0032094;GO:0000278;GO:0106006;GO:0045296;GO:0097440;GO:0005840;GO:0071520;GO:0022011;GO:1902017;GO:0048149;GO:0016020;GO:0051179;GO:0031430;GO:0030424;GO:0032231;GO:0042692;GO:0048549;GO:0005080;GO:0035357;GO:0005768;GO:0050905;GO:0019904;GO:0000916;GO:0005547;GO:0010467;GO:0005856;GO:0007399;GO:0008302;GO:0042974;GO:0007411;GO:0009416;GO:…	CC;BP;BP;BP;BP;BP;BP;MF;MF;CC;CC;BP;BP;BP;BP;CC;BP;CC;CC;BP;BP;BP;MF;BP;CC;BP;MF;BP;MF;BP;CC;BP;BP;MF;BP;BP;BP;BP;CC;BP;BP;CC;CC;BP;MF;BP;BP;CC;BP;BP;BP;CC;BP;BP;MF;MF;CC;BP;CC;CC;MF;BP;BP;BP;BP;BP;BP;CC;CC;BP;BP;CC;BP;MF;MF;CC;BP;BP;CC;BP;CC;BP;MF;CC;CC;BP;BP;BP;BP;CC;BP;BP;BP;BP;CC;CC;BP;MF;MF;BP;BP;BP;BP;CC;BP;BP;CC;CC;BP;CC;BP;BP;BP;BP;BP;BP;BP;CC;BP;MF;MF;CC;BP;BP;CC;BP;BP;BP;BP;CC;BP;MF;BP;…	axonal growth cone;synaptic signaling;actin filament capping;podocyte cell migration;protein localization to plasma membrane;response to food;mitotic cell cycle;cytoskeletal protein-membrane anchor activity;cadherin binding;apical dendrite;ribosome;actomyosin contractile ring assembly actin filament bundle convergence;myelination in peripheral nervous system;regulation of cilium assembly;behavior…	K04437	ko04010;ko04510;ko05132;ko00270;ko05205	MAPK signaling pathway;Focal adhesion;Salmonella infection;Cysteine and methionine metabolism;Proteoglycans in cancer	filamin-A isoform 1 [Homo sapiens]	PF00630.23	Filamin/ABP280 repeat	Filamin-A OS=Homo sapiens OX=9606 GN=FLNA PE=1 SV=4	4N2S4	Z	Filamin-type immunoglobulin domains	-	-	-	-	KOG0518	[Z]	Cytoskeleton;	Actin-binding cytoskeleton protein, filamin	-	row-2
transcript:ENST00000550010	transcript:ENST00000550010	3.15493	15.1509	1.47373e-150	5.7365e-147	up	78.3331	0	3983	0	GO:0070062;GO:0003730;GO:0005654;GO:1904871;GO:0007339;GO:0005739;GO:0030587;GO:0002199;GO:0005794;GO:0040032;GO:0044183;GO:0042470;GO:0005886;GO:0061077;GO:0048027;GO:0009506;GO:0006457;GO:0009505;GO:0005737;GO:0009536;GO:0003723;GO:0044297;GO:0005634;GO:0000792;GO:1904851;GO:0005576;GO:0048487;GO:0009615;GO:0005524;GO:0090666;GO:0001666;GO:0042802;GO:0051086;GO:1904874;GO:0005813;GO:0031681;GO:…	CC;MF;CC;BP;BP;CC;BP;CC;CC;BP;MF;CC;CC;BP;MF;CC;BP;CC;CC;CC;MF;CC;CC;CC;BP;CC;MF;BP;MF;BP;BP;MF;BP;BP;CC;MF;BP;CC;CC;CC;CC;CC;MF;BP;CC;CC;MF;CC;BP;BP;CC;CC;CC;BP;MF;MF;BP;BP;CC;	extracellular exosome;mRNA 3'-UTR binding;nucleoplasm;positive regulation of protein localization to Cajal body;binding of sperm to zona pellucida;mitochondrion;sorocarp development;zona pellucida receptor complex;Golgi apparatus;post-embryonic body morphogenesis;protein folding chaperone;melanosome;plasma membrane;chaperone-mediated protein folding;mRNA 5'-UTR binding;plasmodesma;protein folding…	K09494	-	-	T-complex protein 1 subunit beta isoform X1 [Gorilla gorilla gorilla]	PF00118.28	TCP-1/cpn60 chaperonin family	T-complex protein 1 subunit beta OS=Macaca fascicularis OX=9541 GN=CCT2 PE=2 SV=3	4MTZ9	O	TCP-1/cpn60 chaperonin family	COG0459	Chaperonin GroEL (HSP60 family)	O	Posttranslational modification, protein turnover, chaperones	KOG0363	[O]	Posttranslational modification, protein turnover, chaperones;	Chaperonin complex component, TCP-1 beta subunit (CCT2)	-	row-3
gene:ENSG00000165949	IFI27	5.28372	7.8522	5.23748e-148	1.63095e-144	up	508.238	1.97984	8307	46	GO:0043154;GO:0051607;GO:0005743;GO:0005521;GO:0005739;GO:0060090;GO:2001240;GO:0044827;GO:0005886;GO:0097193;GO:0006955;GO:0043161;GO:0031966;GO:0070269;GO:0051902;GO:0061629;GO:0005741;GO:0001836;GO:0016020;GO:0000122;GO:0009615;GO:0042802;GO:0070936;GO:0098586;GO:0005637;GO:0005789;GO:0097191;GO:0046825;GO:0097190;GO:0043066;GO:0005635;GO:0045087;GO:0060337;GO:0072593;GO:0006915;GO:0042058;	BP;BP;CC;MF;CC;MF;BP;BP;CC;BP;BP;BP;CC;BP;BP;MF;CC;BP;CC;BP;BP;MF;BP;BP;CC;CC;BP;BP;BP;BP;CC;BP;BP;BP;BP;BP;	negative regulation of cysteine-type endopeptidase activity involved in apoptotic process;defense response to virus;mitochondrial inner membrane;lamin binding;mitochondrion;molecular adaptor activity;negative regulation of extrinsic apoptotic signaling pathway in absence of ligand;modulation by host of viral genome replication;plasma membrane;intrinsic apoptotic signaling pathway;immune response;…	K26409	-	-	interferon alpha-inducible protein 27, mitochondrial isoform X2 [Homo sapiens]	PF06140.17	Interferon-induced 6-16 family	Interferon alpha-inducible protein 27, mitochondrial OS=Homo sapiens OX=9606 GN=IFI27 PE=1 SV=4	4N7IE	S	Interferon-induced 6-16 family	-	-	-	-	-	-	-	-	-	row-4
transcript:ENST00000533349	transcript:ENST00000533349	2.80437	-15.1688	4.83667e-146	1.25512e-142	down	0	47.7975	0	5176	GO:0008656;GO:0006281;GO:0046704;GO:0006264;GO:0005739;GO:0009265;GO:0009202;GO:0043025;GO:0061731;GO:0000731;GO:0042246;GO:0009185;GO:0005737;GO:0060041;GO:0005634;GO:0097718;GO:0021846;GO:1900087;GO:0005524;GO:0042802;GO:0004748;GO:0006206;GO:0070318;GO:0042995;GO:0006235;GO:0000166;GO:0010212;GO:0006260;GO:0051290;GO:0031288;GO:0005829;GO:0005971;GO:0010971;GO:0005635;GO:0006240;GO:0017076;GO:…	MF;BP;BP;BP;CC;BP;BP;CC;MF;BP;BP;BP;CC;BP;CC;MF;BP;BP;MF;MF;MF;BP;BP;CC;BP;MF;BP;BP;BP;BP;CC;CC;BP;CC;BP;MF;BP;BP;	cysteine-type endopeptidase activator activity involved in apoptotic process;DNA repair;CDP metabolic process;mitochondrial DNA replication;mitochondrion;2'-deoxyribonucleotide biosynthetic process;deoxyribonucleoside triphosphate biosynthetic process;neuronal cell body;ribonucleoside-diphosphate reductase activity;DNA synthesis involved in DNA repair;tissue regeneration;ribonucleoside diphosphat…	K10807	ko00230;ko00983;ko01100;ko00240;ko00480	Purine metabolism;Drug metabolism - other enzymes;Metabolic pathways;Pyrimidine metabolism;Glutathione metabolism	ribonucleoside-diphosphate reductase large subunit isoform X1 [Peromyscus leucopus]	PF03477.20	ATP cone domain	Ribonucleoside-diphosphate reductase large subunit OS=Pongo abelii OX=9601 GN=RRM1 PE=2 SV=1	48Y78	F	Provides the precursors necessary for DNA synthesis. Catalyzes the biosynthesis of deoxyribonucleotides from the corresponding ribonucleotides	COG0209	Ribonucleotide reductase alpha subunit	F	Nucleotide transport and metabolism	KOG1112	[F]	Nucleotide transport and metabolism;	Ribonucleotide reductase, alpha subunit	-	row-5
transcript:ENST00000508361	transcript:ENST00000508361	2.73302	14.793	3.75141e-140	8.3442e-137	up	43.2017	0	3108	0	GO:0070062;GO:0000049;GO:0005829;GO:0004829;GO:0005524;GO:0042802;GO:0008270;GO:0005737;GO:0006435;	CC;MF;CC;MF;MF;MF;MF;CC;BP;	extracellular exosome;tRNA binding;cytosol;threonine-tRNA ligase activity;ATP binding;identical protein binding;zinc ion binding;cytoplasm;threonyl-tRNA aminoacylation;	K01868	ko00970	Aminoacyl-tRNA biosynthesis	threonine--tRNA ligase 1, cytoplasmic isoform X1 [Neogale vison]	-	-	Threonine--tRNA ligase 1, cytoplasmic OS=Bos taurus OX=9913 GN=TARS1 PE=2 SV=1	4IY8Q	J	threonyl-tRNA synthetase	-	-	-	-	KOG1637	[J]	Translation, ribosomal structure and biogenesis;	Threonyl-tRNA synthetase	-	row-6
gene:ENSG00000270181	BIVM-ERCC5	2.19593	14.4255	1.45747e-129	2.8366e-126	up	19.9935	0	2409	0	GO:0006283;GO:0071140;GO:0003690;GO:0006281;GO:0006284;GO:0005654;GO:0000781;GO:0006259;GO:0031297;GO:0005739;GO:0004520;GO:0071139;GO:0005730;GO:0046872;GO:0003677;GO:0045876;GO:0005694;GO:0000724;GO:0030145;GO:0050790;GO:0044877;GO:1901255;GO:0017108;GO:0000723;GO:0005615;GO:0008821;GO:0007613;GO:0009650;GO:0000405;GO:0010225;GO:0003697;GO:0005737;GO:0010213;GO:0006303;GO:0060041;GO:0000014;GO:…	BP;BP;MF;BP;BP;CC;CC;BP;BP;CC;MF;BP;CC;MF;MF;BP;CC;BP;MF;BP;MF;BP;MF;BP;CC;MF;BP;BP;MF;BP;MF;CC;BP;BP;BP;MF;BP;CC;BP;BP;BP;MF;BP;CC;MF;CC;BP;MF;BP;MF;BP;BP;MF;CC;BP;BP;MF;CC;BP;BP;MF;MF;MF;CC;MF;MF;BP;BP;	transcription-coupled nucleotide-excision repair;resolution of mitotic recombination intermediates;double-stranded DNA binding;DNA repair;base-excision repair;nucleoplasm;chromosome, telomeric region;DNA metabolic process;replication fork processing;mitochondrion;DNA endonuclease activity;resolution of DNA recombination intermediates;nucleolus;metal ion binding;DNA binding;positive regulation of …	K10846	ko03420	Nucleotide excision repair	BIVM-ERCC5 protein [Homo sapiens]	PF00867.22	XPG I-region	DNA excision repair protein ERCC-5 OS=Homo sapiens OX=9606 GN=ERCC5 PE=1 SV=3	4N87H	L	Xeroderma pigmentosum G N-region	COG0258	5'-3' exonuclease Xni/ExoIX (flap endonuclease)	L	Replication, recombination and repair	KOG2520	[L]	Replication, recombination and repair;	5'-3' exonuclease	-	row-7
transcript:ENST00000586146	transcript:ENST00000586146	2.80286	14.3965	9.75089e-129	1.6869e-125	up	47.6954	0	2361	0	GO:0016020;GO:0051290;GO:0000049;GO:0005829;GO:0005524;GO:0002161;GO:0005886;GO:0002181;GO:0005737;GO:0009328;GO:0003723;GO:0000287;GO:0004826;GO:0006432;GO:0048856;	CC;BP;MF;CC;MF;MF;CC;BP;CC;CC;MF;MF;MF;BP;BP;	membrane;protein heterotetramerization;tRNA binding;cytosol;ATP binding;aminoacyl-tRNA editing activity;plasma membrane;cytoplasmic translation;cytoplasm;phenylalanine-tRNA ligase complex;RNA binding;magnesium ion binding;phenylalanine-tRNA ligase activity;phenylalanyl-tRNA aminoacylation;anatomical structure development;	K01889	ko00970	Aminoacyl-tRNA biosynthesis	PREDICTED: phenylalanine--tRNA ligase alpha subunit isoform X2 [Cercocebus atys]	PF18552.5	PheRS DNA binding domain 1	Phenylalanine--tRNA ligase alpha subunit OS=Homo sapiens OX=9606 GN=FARSA PE=1 SV=3	4N65T	J	phenylalanyl-tRNA aminoacylation	COG0016	Phenylalanyl-tRNA synthetase alpha subunit	J	Translation, ribosomal structure and biogenesis	KOG2784	[J]	Translation, ribosomal structure and biogenesis;	Phenylalanyl-tRNA synthetase, beta subunit	-	row-8
transcript:ENST00000353275	transcript:ENST00000353275	1.75943	-14.456	1.58875e-125	2.47368e-122	down	0	10.4626	0	3158	GO:0003714;GO:2001032;GO:0032357;GO:0045944;GO:0019899;GO:0046975;GO:0005700;GO:0005634;GO:0000710;GO:0006298;GO:0016447;GO:0140952;GO:0032137;GO:0000122;GO:0009411;GO:0008327;GO:0016446;GO:0051096;GO:0005721;GO:0070201;GO:0003713;GO:0007129;GO:0045892;GO:0045190;GO:0046976;GO:0035064;GO:0042799;GO:0042974;GO:0005654;GO:0140955;GO:0048298;GO:0045893;GO:0008270;GO:0043565;GO:0008630;GO:0140566;GO:…	MF;BP;MF;BP;MF;MF;CC;CC;BP;BP;BP;MF;MF;BP;BP;MF;BP;BP;CC;BP;MF;BP;BP;BP;MF;MF;MF;MF;CC;MF;BP;BP;MF;MF;BP;MF;CC;BP;BP;MF;BP;MF;CC;BP;CC;MF;MF;BP;BP;MF;BP;MF;MF;MF;BP;BP;MF;BP;BP;BP;BP;BP;CC;MF;BP;MF;MF;MF;MF;MF;CC;BP;MF;MF;MF;CC;BP;MF;BP;MF;MF;CC;MF;MF;CC;BP;BP;MF;BP;MF;BP;BP;BP;CC;MF;MF;CC;CC;BP;MF;BP;	transcription corepressor activity;regulation of double-strand break repair via nonhomologous end joining;oxidized purine DNA binding;positive regulation of transcription by RNA polymerase II;enzyme binding;histone H3K36 methyltransferase activity;polytene chromosome;nucleus;meiotic mismatch repair;mismatch repair;somatic recombination of immunoglobulin gene segments;histone H3K27 dimethyltransfe…	K11424	ko00010;ko05202;ko00310	Glycolysis / Gluconeogenesis;Transcriptional misregulation in cancer;Lysine degradation	histone-lysine N-methyltransferase NSD2 isoform X4 [Homo sapiens]	PF00855.21	PWWP domain	Histone-lysine N-methyltransferase NSD2 OS=Homo sapiens OX=9606 GN=NSD2 PE=1 SV=1	4M9AP	K	associated with SET domains	-	-	-	-	KOG1081	[K]	Transcription;	Transcription factor NSD1 and related SET domain proteins	HMG	row-9
transcript:ENST00000534405	transcript:ENST00000534405	2.48462	10.3072	3.33686e-124	4.72318e-121	up	29.793	0.017276	2113	2	GO:0070062;GO:0001778;GO:0004767;GO:0005811;GO:0046598;GO:0008270;GO:0006672;GO:0046872;GO:0045824;GO:0009143;GO:0005886;GO:0045121;GO:0071277;GO:0046479;GO:0034480;GO:0007165;GO:0005615;GO:0034612;GO:0006954;GO:0050728;GO:0061750;GO:0016798;GO:0006684;GO:0042220;GO:0009410;GO:0005576;GO:0035307;GO:0009615;GO:0006685;GO:0070555;GO:0046718;GO:0008081;GO:0043065;GO:0008203;GO:0034644;GO:0010212;GO:…	CC;BP;MF;CC;BP;MF;BP;MF;BP;BP;CC;CC;BP;BP;MF;BP;CC;BP;BP;BP;MF;MF;BP;BP;BP;CC;BP;BP;BP;BP;BP;MF;BP;BP;BP;BP;CC;BP;BP;BP;BP;CC;CC;BP;BP;BP;BP;CC;BP;BP;CC;CC;CC;BP;	extracellular exosome;plasma membrane repair;sphingomyelin phosphodiesterase activity;lipid droplet;positive regulation of viral entry into host cell;zinc ion binding;ceramide metabolic process;metal ion binding;negative regulation of innate immune response;nucleoside triphosphate catabolic process;plasma membrane;membrane raft;cellular response to calcium ion;glycosphingolipid catabolic process;…	K12350	ko04071;ko01100;ko04142;ko04217;ko00600	Sphingolipid signaling pathway;Metabolic pathways;Lysosome;Necroptosis;Sphingolipid metabolism	sphingomyelin phosphodiesterase [Pongo abelii]	PF00149.32	Calcineurin-like phosphoesterase	Sphingomyelin phosphodiesterase OS=Homo sapiens OX=9606 GN=SMPD1 PE=1 SV=5	4MUWX	I	Saposin (B) Domains	-	-	-	-	KOG3770	[I]	Lipid transport and metabolism;	Acid sphingomyelinase and PHM5 phosphate metabolism protein	-	row-10
transcript:ENST00000636787	transcript:ENST00000636787	2.57269	14.1614	4.82239e-122	6.25705e-119	up	34.3929	0	2006	0	GO:0070062;GO:0002003;GO:0021626;GO:0045851;GO:0045211;GO:0005886;GO:0021903;GO:0030665;GO:0030672;GO:0005615;GO:0070821;GO:0051452;GO:0101003;GO:0007042;GO:0038023;GO:0044297;GO:0090263;GO:0009897;GO:0060323;GO:0016020;GO:0043408;GO:0032591;GO:0030424;GO:0016324;GO:0005789;GO:0033176;GO:0010008;GO:0000421;GO:0032914;GO:0048069;GO:0007035;GO:0048388;GO:0000139;GO:1902600;GO:0005765;GO:0016471;GO:…	CC;BP;BP;BP;CC;CC;BP;CC;CC;CC;CC;BP;CC;BP;MF;CC;BP;CC;BP;CC;BP;CC;CC;CC;CC;CC;CC;CC;BP;BP;BP;BP;CC;BP;CC;CC;CC;CC;BP;BP;BP;	extracellular exosome;angiotensin maturation;central nervous system maturation;pH reduction;postsynaptic membrane;plasma membrane;rostrocaudal neural tube patterning;clathrin-coated vesicle membrane;synaptic vesicle membrane;extracellular space;tertiary granule membrane;intracellular pH reduction;ficolin-1-rich granule membrane;lysosomal lumen acidification;signaling receptor activity;cell body;p…	K19514	ko04614	Renin-angiotensin system	renin receptor [Hylobates moloch]	PF01663.26	Type I phosphodiesterase / nucleotide pyrophosphatase	Renin receptor OS=Pongo abelii OX=9601 GN=ATP6AP2 PE=2 SV=1	4MX4S	T	eye pigmentation	-	-	-	-	KOG4737	[C]	Energy production and conversion;	ATPase membrane sector associated protein	-	row-11
transcript:ENST00000312087	transcript:ENST00000312087	1.60014	14.0922	4.50585e-120	5.39662e-117	up	8.1914	0	1912	0	GO:0003714;GO:2001032;GO:0032357;GO:0045944;GO:0019899;GO:0046975;GO:0005700;GO:0005634;GO:0000710;GO:0006298;GO:0016447;GO:0140952;GO:0032137;GO:0000122;GO:0009411;GO:0008327;GO:0016446;GO:0051096;GO:0005721;GO:0070201;GO:0003713;GO:0007129;GO:0045892;GO:0045190;GO:0046976;GO:0035064;GO:0042799;GO:0042974;GO:0005654;GO:0140955;GO:0048298;GO:0045893;GO:0008270;GO:0043565;GO:0008630;GO:0140566;GO:…	MF;BP;MF;BP;MF;MF;CC;CC;BP;BP;BP;MF;MF;BP;BP;MF;BP;BP;CC;BP;MF;BP;BP;BP;MF;MF;MF;MF;CC;MF;BP;BP;MF;MF;BP;MF;CC;BP;BP;MF;BP;MF;CC;BP;CC;MF;MF;BP;BP;MF;BP;MF;MF;MF;BP;BP;MF;BP;BP;BP;BP;BP;CC;MF;BP;MF;MF;MF;MF;MF;CC;BP;MF;MF;MF;CC;BP;MF;BP;MF;MF;CC;MF;MF;CC;BP;BP;MF;BP;MF;BP;BP;BP;CC;MF;MF;CC;CC;BP;MF;BP;	transcription corepressor activity;regulation of double-strand break repair via nonhomologous end joining;oxidized purine DNA binding;positive regulation of transcription by RNA polymerase II;enzyme binding;histone H3K36 methyltransferase activity;polytene chromosome;nucleus;meiotic mismatch repair;mismatch repair;somatic recombination of immunoglobulin gene segments;histone H3K27 dimethyltransfe…	K11424	ko00010;ko05202;ko00310	Glycolysis / Gluconeogenesis;Transcriptional misregulation in cancer;Lysine degradation	histone-lysine N-methyltransferase NSD2 isoform X4 [Homo sapiens]	PF00855.21	PWWP domain	Histone-lysine N-methyltransferase NSD2 OS=Homo sapiens OX=9606 GN=NSD2 PE=1 SV=1	4M9AP	K	associated with SET domains	-	-	-	-	KOG1081	[K]	Transcription;	Transcription factor NSD1 and related SET domain proteins	HMG	row-12
transcript:ENST00000525607	transcript:ENST00000525607	2.66427	-14.191	5.06798e-118	5.63631e-115	down	0	39.184	0	2628	GO:0045338;GO:0016020;GO:0051996;GO:0004310;GO:0006695;GO:0008299;GO:0046872;GO:0006694;GO:0005783;GO:0005789;	BP;CC;MF;MF;BP;BP;MF;BP;CC;CC;	farnesyl diphosphate metabolic process;membrane;squalene synthase [NAD(P)H] activity;obsolete farnesyl-diphosphate farnesyltransferase activity;cholesterol biosynthetic process;isoprenoid biosynthetic process;metal ion binding;steroid biosynthetic process;endoplasmic reticulum;endoplasmic reticulum membrane;	K00801	ko01100;ko00100	Metabolic pathways;Steroid biosynthesis	PREDICTED: squalene synthase isoform X2 [Colobus angolensis palliatus]	-	-	Squalene synthase OS=Pongo abelii OX=9601 GN=FDFT1 PE=2 SV=1	4N2FK	I	farnesyl-diphosphate farnesyltransferase activity	-	-	-	-	KOG1459	[I]	Lipid transport and metabolism;	Squalene synthetase	-	row-13
transcript:ENST00000504594	transcript:ENST00000504594	2.71475	13.2708	2.55518e-97	2.65228e-94	up	42.0963	0	1082	0	GO:0045580;GO:0005654;GO:0005743;GO:0005739;GO:0090201;GO:0046337;GO:0042407;GO:0008289;GO:0010917;GO:0051881;GO:0030706;GO:1990050;GO:0048813;GO:2001140;GO:0030061;GO:0005737;GO:0045332;GO:0031314;GO:0005634;GO:0030432;GO:0010950;GO:2001247;GO:0032991;GO:0015914;GO:0070234;GO:0007005;GO:0008345;GO:0007006;GO:0032048;GO:0097035;GO:0120010;GO:2001246;GO:0005829;GO:0043066;GO:0007283;GO:0005758;GO:…	BP;CC;CC;CC;BP;BP;BP;MF;BP;BP;BP;MF;BP;BP;CC;CC;BP;CC;CC;BP;BP;BP;CC;BP;BP;BP;BP;BP;BP;BP;BP;BP;CC;BP;BP;CC;BP;BP;BP;	regulation of T cell differentiation;nucleoplasm;mitochondrial inner membrane;mitochondrion;negative regulation of release of cytochrome c from mitochondria;phosphatidylethanolamine metabolic process;cristae formation;lipid binding;negative regulation of mitochondrial membrane potential;regulation of mitochondrial membrane potential;germarium-derived oocyte differentiation;phosphatidic acid trans…	-	-	-	PREDICTED: PRELI domain-containing protein 1, mitochondrial isoform X2 [Miniopterus natalensis]	PF04707.18	PRELI-like family	PRELI domain-containing protein 1, mitochondrial OS=Homo sapiens OX=9606 GN=PRELID1 PE=1 SV=1	4MTIN	U	PRELI domain containing	-	-	-	-	KOG3337	[U]	Intracellular trafficking, secretion, and vesicular transport;	Protein similar to predicted member of the intramitochondrial sorting protein family	-	row-14
transcript:ENST00000543428	transcript:ENST00000543428	2.61733	13.1801	6.73436e-95	6.55338e-92	up	36.6521	0	1016	0	GO:0070062;GO:0016020;GO:0008537;GO:0061133;GO:0005634;GO:0005829;GO:0005654;GO:2001237;GO:0002039;GO:0097371;GO:0042802;GO:0005737;GO:0019884;GO:0007049;GO:0061136;GO:0000502;GO:0006915;GO:2000045;	CC;CC;CC;MF;CC;CC;CC;BP;MF;MF;MF;CC;BP;BP;BP;CC;BP;BP;	extracellular exosome;membrane;proteasome activator complex;endopeptidase activator activity;nucleus;cytosol;nucleoplasm;negative regulation of extrinsic apoptotic signaling pathway;p53 binding;MDM2/MDM4 family protein binding;identical protein binding;cytoplasm;antigen processing and presentation of exogenous antigen;cell cycle;regulation of proteasomal protein catabolic process;proteasome compl…	K06698	ko03050;ko05160;ko04612	Proteasome;Hepatitis C;Antigen processing and presentation	proteasome activator complex subunit 3 isoform X4 [Theropithecus gelada]	PF02251.22	Proteasome activator pa28 alpha subunit	Proteasome activator complex subunit 3 OS=Sus scrofa OX=9823 GN=PSME3 PE=2 SV=1	4IW2J	O	Proteasome (prosome, macropain) activator subunit 3 (PA28 gamma	-	-	-	-	KOG4470	[O]	Posttranslational modification, protein turnover, chaperones;	Proteasome activator subunit	-	row-15
transcript:ENST00000587310	transcript:ENST00000587310	2.96888	7.88519	4.26071e-94	3.90231e-91	up	50.8022	0.183296	1131	6	-	-	-	K17300	-	-	-	-	-	-	-	-	-	-	-	-	-	-	-	-	-	-	row-16
transcript:ENST00000567118	transcript:ENST00000567118	2.001	13.131	1.44761e-93	1.25218e-90	up	15.0221	0	982	0	GO:0001889;GO:0070062;GO:2000767;GO:0004713;GO:0032868;GO:0032869;GO:0070324;GO:0005739;GO:0012501;GO:0042866;GO:0045296;GO:0005886;GO:0016301;GO:0004743;GO:0035402;GO:0045944;GO:0005791;GO:0062023;GO:0006090;GO:1904813;GO:0043403;GO:1903672;GO:0023026;GO:0009629;GO:0034774;GO:0005737;GO:0003723;GO:1902912;GO:0010033;GO:0005634;GO:1903561;GO:0030955;GO:0031982;GO:0048029;GO:0042593;GO:0051289;GO:…	BP;CC;BP;MF;BP;BP;MF;CC;BP;BP;MF;CC;MF;MF;MF;BP;CC;CC;BP;CC;BP;BP;MF;BP;CC;CC;MF;CC;BP;CC;CC;MF;CC;MF;BP;BP;CC;BP;MF;BP;MF;BP;MF;CC;BP;BP;BP;MF;CC;BP;BP;CC;MF;BP;CC;BP;MF;BP;BP;BP;MF;BP;BP;MF;BP;	liver development;extracellular exosome;positive regulation of cytoplasmic translation;protein tyrosine kinase activity;response to insulin;cellular response to insulin stimulus;thyroid hormone binding;mitochondrion;programmed cell death;pyruvate biosynthetic process;cadherin binding;plasma membrane;kinase activity;pyruvate kinase activity;histone H3T11 kinase activity;positive regulation of tran…	K00873	ko04930;ko04922;ko00620;ko00230;ko05230;ko05203;ko01200;ko00010;ko05165;ko01230;ko01100	Type II diabetes mellitus;Glucagon signaling pathway;Pyruvate metabolism;Purine metabolism;Central carbon metabolism in cancer;Viral carcinogenesis;Carbon metabolism;Glycolysis / Gluconeogenesis;Human papillomavirus infection;Biosynthesis of amino acids;Metabolic pathways	pyruvate kinase PKM isoform X5 [Theropithecus gelada]	-	-	Pyruvate kinase PKM OS=Pongo abelii OX=9601 GN=PKM PE=2 SV=3	4M9IN	G	Pyruvate kinase	-	-	-	-	KOG2323	[G]	Carbohydrate transport and metabolism;	Pyruvate kinase	-	row-17
transcript:ENST00000509031	transcript:ENST00000509031	2.51757	-13.2989	1.74194e-93	1.42747e-90	down	0	31.789	0	1416	GO:0070062;GO:0005739;GO:0045893;GO:0034728;GO:0004427;GO:0006796;GO:0005759;GO:0045944;GO:0051881;GO:0005737;GO:0005634;GO:0035206;GO:0071344;GO:0045202;GO:0006338;GO:0016589;GO:0005829;GO:0004722;GO:0000287;GO:0016462;	CC;CC;BP;BP;MF;BP;CC;BP;BP;CC;CC;BP;BP;CC;BP;CC;CC;MF;MF;MF;	extracellular exosome;mitochondrion;positive regulation of DNA-templated transcription;nucleosome organization;inorganic diphosphate phosphatase activity;phosphate-containing compound metabolic process;mitochondrial matrix;positive regulation of transcription by RNA polymerase II;regulation of mitochondrial membrane potential;cytoplasm;nucleus;regulation of hemocyte proliferation;diphosphate meta…	K01507	ko00190	Oxidative phosphorylation	inorganic pyrophosphatase 2, mitochondrial isoform X2 [Microcebus murinus]	-	-	Inorganic pyrophosphatase 2, mitochondrial OS=Homo sapiens OX=9606 GN=PPA2 PE=1 SV=2	4N027	C	Inorganic pyrophosphatase	-	-	-	-	KOG1626	[C]	Energy production and conversion;	Inorganic pyrophosphatase/Nucleosome remodeling factor, subunit NURF38	-	row-18
transcript:ENST00000445387	transcript:ENST00000445387	1.25837	13.1117	4.83265e-93	3.76222e-90	up	4.72289	0	969	0	GO:0006357;GO:1900109;GO:0008542;GO:0003714;GO:0140947;GO:0006974;GO:0106363;GO:0001046;GO:0035035;GO:0035984;GO:0002674;GO:0140949;GO:0018027;GO:0009910;GO:0010508;GO:0010385;GO:0140727;GO:1902275;GO:0140945;GO:0007399;GO:0042974;GO:0031934;GO:0045893;GO:0007411;GO:0043565;GO:0009416;GO:0007623;GO:0035076;GO:0000792;GO:0044666;GO:1902850;GO:0043021;GO:0000978;GO:0000729;GO:0018023;GO:0042800;GO:…	BP;BP;BP;MF;MF;BP;MF;MF;MF;BP;BP;MF;BP;BP;BP;MF;BP;BP;MF;BP;MF;CC;BP;BP;MF;BP;BP;BP;CC;CC;BP;MF;MF;BP;BP;MF;BP;BP;MF;BP;BP;BP;BP;BP;MF;CC;MF;MF;CC;CC;BP;BP;MF;BP;BP;BP;BP;CC;BP;MF;BP;BP;CC;CC;BP;MF;BP;MF;MF;MF;BP;BP;BP;BP;MF;BP;BP;BP;BP;BP;BP;BP;BP;BP;BP;MF;BP;MF;BP;BP;BP;MF;BP;BP;BP;BP;BP;MF;MF;BP;BP;BP;CC;BP;CC;MF;BP;BP;BP;BP;BP;MF;BP;CC;BP;BP;BP;MF;BP;BP;BP;BP;BP;MF;MF;CC;BP;BP;BP;BP;BP;BP;CC;…	regulation of transcription by RNA polymerase II;obsolete regulation of histone H3-K9 dimethylation;visual learning;transcription corepressor activity;histone H3K9me2 methyltransferase activity;DNA damage response;protein-cysteine methyltransferase activity;core promoter sequence-specific DNA binding;histone acetyltransferase binding;cellular response to trichostatin A;negative regulation of acut…	K11423	ko00310	Lysine degradation	histone-lysine N-methyltransferase SETD2 isoform 1 [Homo sapiens]	PF00856.32	SET domain	Histone-lysine N-methyltransferase SETD2 OS=Homo sapiens OX=9606 GN=SETD2 PE=1 SV=3	4N611	K	SET domain containing 2	COG2940	SET domain-containing protein (function unknown)	R	General function prediction only	KOG4442	[U]	Intracellular trafficking, secretion, and vesicular transport;	Clathrin coat binding protein/Huntingtin interacting protein HIP1, involved in regulation of endocytosis	-	row-19
transcript:ENST00000395491	transcript:ENST00000395491	1.9346	13.0801	2.90832e-92	2.15631e-89	up	13.6133	0	948	0	-	-	-	-	-	-	-	-	-	-	-	-	-	-	-	-	-	-	-	-	-	-	row-20
transcript:ENST00000594001	transcript:ENST00000594001	2.36354	-13.2471	4.14524e-92	2.9337e-89	down	0	25.4844	0	1366	GO:0070062;GO:0006886;GO:0098793;GO:0030182;GO:0031594;GO:0032781;GO:0000149;GO:0005886;GO:0044877;GO:0035249;GO:0005483;GO:0019905;GO:0035494;GO:0098978;GO:0002090;GO:0098794;GO:0016020;GO:0048787;GO:0045202;GO:0070044;GO:0045176;GO:0061025;GO:0006891;GO:0048488;GO:0043209;GO:0010807;GO:0005829;GO:0016082;GO:0032984;GO:0007420;GO:0043462;GO:0043195;	CC;BP;CC;BP;CC;BP;MF;CC;MF;BP;MF;MF;BP;CC;BP;CC;CC;CC;CC;CC;BP;BP;BP;BP;CC;BP;CC;BP;BP;BP;BP;CC;	extracellular exosome;intracellular protein transport;presynapse;neuron differentiation;neuromuscular junction;positive regulation of ATP-dependent activity;SNARE binding;plasma membrane;protein-containing complex binding;synaptic transmission, glutamatergic;soluble NSF attachment protein activity;syntaxin binding;SNARE complex disassembly;glutamatergic synapse;regulation of receptor internalizat…	K15296	ko04721	Synaptic vesicle cycle	alpha-soluble NSF attachment protein, partial [Panthera uncia]	PF14938.10	Soluble NSF attachment protein, SNAP	Alpha-soluble NSF attachment protein OS=Bos taurus OX=9913 GN=NAPA PE=1 SV=1	4PWYI	U	soluble NSF attachment protein activity	-	-	-	-	KOG1586	[U]	Intracellular trafficking, secretion, and vesicular transport;	Protein required for fusion of vesicles in vesicular transport, alpha-SNAP	-	row-21
gene:ENSG00000126709	IFI6	6.72496	5.01471	7.20385e-92	4.8767e-89	up	590.58	17.9154	14260	566	GO:0043154;GO:0051607;GO:0005743;GO:0005521;GO:0005739;GO:0060090;GO:2001240;GO:0044827;GO:0005886;GO:0097193;GO:0006955;GO:0043161;GO:0031966;GO:0070269;GO:0051902;GO:0061629;GO:0005741;GO:0001836;GO:0016020;GO:0000122;GO:0009615;GO:0042802;GO:0070936;GO:0098586;GO:0005637;GO:0005789;GO:0097191;GO:0046825;GO:0097190;GO:0043066;GO:0045087;GO:0005635;GO:0060337;GO:0072593;GO:0006915;GO:0042058;	BP;BP;CC;MF;CC;MF;BP;BP;CC;BP;BP;BP;CC;BP;BP;MF;CC;BP;CC;BP;BP;MF;BP;BP;CC;CC;BP;BP;BP;BP;BP;CC;BP;BP;BP;BP;	negative regulation of cysteine-type endopeptidase activity involved in apoptotic process;defense response to virus;mitochondrial inner membrane;lamin binding;mitochondrion;molecular adaptor activity;negative regulation of extrinsic apoptotic signaling pathway in absence of ligand;modulation by host of viral genome replication;plasma membrane;intrinsic apoptotic signaling pathway;immune response;…	K26408	-	-	interferon alpha-inducible protein 6 isoform c precursor [Homo sapiens]	PF06140.17	Interferon-induced 6-16 family	Interferon alpha-inducible protein 6 OS=Homo sapiens OX=9606 GN=IFI6 PE=1 SV=2	4N6P8	T	negative regulation of mitochondrial depolarization	-	-	-	-	-	-	-	-	-	row-22
transcript:ENST00000311943	transcript:ENST00000311943	2.01056	12.9907	7.1105e-90	4.61294e-87	up	15.236	0	891	0	GO:0042581;GO:0006886;GO:0006888;GO:0006892;GO:0098793;GO:0007269;GO:0031234;GO:0007271;GO:0030134;GO:0006890;GO:0005739;GO:0030141;GO:0000149;GO:0009636;GO:0005783;GO:0005886;GO:0009416;GO:0000902;GO:0030348;GO:0006904;GO:0044877;GO:0043312;GO:0048190;GO:0017075;GO:0016192;GO:0019905;GO:0005737;GO:0001956;GO:0006896;GO:0005798;GO:0035543;GO:0016020;GO:0005801;GO:0046578;GO:0030424;GO:0032940;GO:…	CC;BP;BP;BP;CC;BP;CC;BP;CC;BP;CC;CC;MF;BP;CC;CC;BP;BP;MF;BP;MF;BP;BP;MF;BP;MF;CC;BP;BP;CC;BP;CC;CC;BP;CC;BP;BP;BP;CC;BP;BP;CC;CC;CC;BP;BP;CC;BP;BP;CC;BP;BP;BP;BP;CC;BP;CC;BP;BP;CC;BP;MF;CC;CC;CC;CC;	specific granule;intracellular protein transport;endoplasmic reticulum to Golgi vesicle-mediated transport;post-Golgi vesicle-mediated transport;presynapse;neurotransmitter secretion;extrinsic component of cytoplasmic side of plasma membrane;synaptic transmission, cholinergic;COPII-coated ER to Golgi transport vesicle;retrograde vesicle-mediated transport, Golgi to endoplasmic reticulum;mitochond…	K19998	-	-	sec1 family domain-containing protein 1 isoform X4 [Homo sapiens]	PF00995.27	Sec1 family	Sec1 family domain-containing protein 1 OS=Homo sapiens OX=9606 GN=SCFD1 PE=1 SV=4	4MTXX	U	Sec1 family	-	-	-	-	KOG1301	[U]	Intracellular trafficking, secretion, and vesicular transport;	Vesicle trafficking protein Sly1 (Sec1 family)	-	row-23
transcript:ENST00000592705	transcript:ENST00000592705	1.44619	-13.1397	2.76012e-89	1.719e-86	down	0	6.4249	0	1268	GO:1904707;GO:0014823;GO:0043073;GO:0005654;GO:0008168;GO:1990090;GO:1990841;GO:0030182;GO:0008270;GO:0042826;GO:0030331;GO:0003677;GO:1903926;GO:0009636;GO:0033574;GO:1905931;GO:0010468;GO:0006346;GO:0010629;GO:0044027;GO:0001674;GO:0071230;GO:0045471;GO:0005737;GO:0042127;GO:0003723;GO:1905460;GO:0032776;GO:0010033;GO:0005634;GO:0032496;GO:0009410;GO:0046500;GO:0000792;GO:0010288;GO:0031000;GO:…	BP;BP;CC;CC;MF;BP;MF;BP;MF;MF;MF;MF;BP;BP;BP;BP;BP;BP;BP;BP;CC;BP;BP;CC;BP;MF;BP;BP;BP;CC;BP;BP;BP;CC;BP;BP;BP;BP;BP;BP;MF;CC;BP;MF;BP;MF;BP;BP;CC;BP;CC;MF;BP;BP;BP;MF;MF;BP;MF;BP;	positive regulation of vascular associated smooth muscle cell proliferation;response to activity;germ cell nucleus;nucleoplasm;methyltransferase activity;cellular response to nerve growth factor stimulus;promoter-specific chromatin binding;neuron differentiation;zinc ion binding;histone deacetylase binding;nuclear estrogen receptor binding;DNA binding;cellular response to bisphenol A;response to …	K00558	ko00270;ko01100;ko05206	Cysteine and methionine metabolism;Metabolic pathways;MicroRNAs in cancer	DNA (cytosine-5)-methyltransferase 1 isoform X2 [Symphalangus syndactylus]	PF06464.15	DMAP1-binding Domain	DNA (cytosine-5)-methyltransferase 1 OS=Homo sapiens OX=9606 GN=DNMT1 PE=1 SV=2	4MW8Y	B	Cytosine specific DNA methyltransferase replication foci domain	-	-	-	-	-	-	-	-	-	row-24
transcript:ENST00000427960	transcript:ENST00000427960	1.9926	-6.16712	5.0646e-86	3.03292e-83	down	0.16931	12.5437	22	2039	GO:0005654;GO:0045943;GO:0005730;GO:0032040;GO:0042274;GO:2000234;GO:0003723;GO:0006364;	CC;BP;CC;CC;BP;BP;MF;BP;	nucleoplasm;positive regulation of transcription by RNA polymerase I;nucleolus;small-subunit processome;ribosomal small subunit biogenesis;positive regulation of rRNA processing;RNA binding;rRNA processing;	K14552	ko03008	Ribosome biogenesis in eukaryotes	WD repeat-containing protein 75 isoform X1 [Macaca fascicularis]	PF00400.36	WD domain, G-beta repeat	WD repeat-containing protein 75 OS=Homo sapiens OX=9606 GN=WDR75 PE=1 SV=1	4MDI8	S	WD domain, G-beta repeat	-	-	-	-	KOG1963	[R]	General function prediction only;	WD40 repeat protein	-	row-25
transcript:ENST00000482936	transcript:ENST00000482936	1.35928	12.8317	1.02576e-85	5.91522e-83	up	5.58213	0	798	0	GO:0006357;GO:0032508;GO:0006283;GO:0004386;GO:0048568;GO:0070716;GO:0051026;GO:0022405;GO:0048364;GO:0000922;GO:0034085;GO:0090657;GO:1901838;GO:0006974;GO:0045142;GO:0006362;GO:0045951;GO:0006366;GO:0005634;GO:0010705;GO:0016818;GO:0005819;GO:0007284;GO:0043007;GO:0009411;GO:0000725;GO:0006289;GO:0051880;GO:1904976;GO:0005669;GO:0035861;GO:0035264;GO:1904358;GO:0003724;GO:1904355;GO:0031965;GO:…	BP;BP;BP;MF;BP;BP;BP;BP;BP;CC;BP;BP;BP;BP;MF;BP;BP;BP;CC;BP;MF;CC;BP;BP;BP;BP;BP;MF;BP;CC;CC;BP;BP;MF;BP;CC;BP;BP;BP;BP;BP;BP;CC;CC;CC;BP;BP;MF;CC;BP;CC;BP;BP;BP;BP;MF;BP;BP;MF;CC;CC;BP;BP;BP;BP;BP;MF;BP;BP;BP;BP;BP;BP;CC;MF;CC;MF;BP;CC;BP;BP;CC;BP;BP;BP;MF;BP;MF;CC;CC;BP;CC;BP;BP;BP;BP;BP;BP;CC;BP;BP;BP;MF;BP;MF;CC;BP;BP;CC;BP;CC;BP;BP;BP;BP;MF;BP;MF;BP;BP;BP;BP;BP;MF;MF;BP;BP;CC;BP;BP;BP;MF;BP;…	regulation of transcription by RNA polymerase II;DNA duplex unwinding;transcription-coupled nucleotide-excision repair;helicase activity;embryonic organ development;mismatch repair involved in maintenance of fidelity involved in DNA-dependent DNA replication;chiasma assembly;hair cycle process;root development;spindle pole;establishment of sister chromatid cohesion;telomeric loop disassembly;posi…	K11136	-	-	regulator of telomere elongation helicase 1 isoform X3 [Gorilla gorilla gorilla]	PF06733.19	DEAD_2	Regulator of telomere elongation helicase 1 OS=Pongo abelii OX=9601 GN=RTEL1 PE=2 SV=1	4N4TN	L	regulation of double-strand break repair via homologous recombination	COG1199	Rad3-related DNA helicase DinG	L	Replication, recombination and repair	KOG1132	[L]	Replication, recombination and repair;	Helicase of the DEAD superfamily	-	row-26
transcript:ENST00000434055	transcript:ENST00000434055	3.372	4.96133	1.16068e-85	6.45419e-83	up	43.9835	1.38285	5392	222	GO:0044295;GO:0051081;GO:1990049;GO:0000922;GO:0034454;GO:0099558;GO:0000278;GO:0035371;GO:0045121;GO:0061670;GO:0051286;GO:0030286;GO:0070854;GO:1904398;GO:0001709;GO:0000743;GO:0005634;GO:0048491;GO:0005819;GO:0007026;GO:0016020;GO:0030424;GO:0071889;GO:0005876;GO:0051256;GO:0003777;GO:0061803;GO:1900006;GO:0043065;GO:0001578;GO:0050905;GO:0061744;GO:0110092;GO:0001726;GO:0048489;GO:1903078;GO:…	CC;BP;BP;CC;BP;BP;BP;CC;CC;BP;CC;CC;MF;BP;BP;BP;CC;BP;CC;BP;CC;CC;MF;CC;BP;MF;CC;BP;BP;BP;BP;BP;CC;CC;BP;BP;CC;BP;BP;MF;BP;BP;MF;CC;BP;BP;CC;CC;BP;CC;BP;CC;CC;CC;CC;MF;CC;CC;CC;BP;BP;MF;MF;BP;BP;CC;CC;BP;BP;BP;BP;CC;BP;CC;BP;CC;CC;CC;MF;CC;BP;CC;BP;BP;CC;CC;CC;CC;BP;MF;CC;CC;CC;CC;BP;CC;BP;BP;CC;BP;BP;BP;CC;BP;MF;CC;BP;BP;MF;CC;BP;BP;CC;BP;BP;CC;BP;CC;BP;CC;MF;CC;CC;MF;BP;BP;BP;CC;MF;CC;BP;BP;CC;…	axonal growth cone;nuclear membrane disassembly;retrograde neuronal dense core vesicle transport;spindle pole;microtubule anchoring at centrosome;maintenance of synapse structure;mitotic cell cycle;microtubule plus-end;membrane raft;evoked neurotransmitter secretion;cell tip;dynein complex;myosin VI heavy chain binding;positive regulation of neuromuscular junction development;cell fate determinat…	K04648	ko05016;ko04962	Huntington disease;Vasopressin-regulated water reabsorption	dynactin subunit 1 isoform X12 [Pan paniscus]	PF12455.12	Dynein associated protein	Dynactin subunit 1 OS=Homo sapiens OX=9606 GN=DCTN1 PE=1 SV=3	4MEXE	DZ	dynactin	-	-	-	-	KOG0971	[DZ]	Cell cycle control, cell division, chromosome partitioning; Cytoskeleton;	Microtubule-associated protein dynactin DCTN1/Glued	-	row-27
transcript:ENST00000475723	transcript:ENST00000475723	2.24615	-6.39263	2.07569e-84	1.11443e-81	down	0.202155	17.7221	16	1737	GO:0005743;GO:0005739;GO:0000281;GO:0030496;GO:0005813;GO:0051301;GO:0007049;GO:0034551;GO:0070469;	CC;CC;BP;CC;CC;BP;BP;BP;CC;	mitochondrial inner membrane;mitochondrion;mitotic cytokinesis;midbody;centrosome;cell division;cell cycle;mitochondrial respiratory chain complex III assembly;obsolete respirasome;	K18169	-	-	tetratricopeptide repeat protein 19, mitochondrial isoform X1 [Gorilla gorilla gorilla]	-	-	Tetratricopeptide repeat protein 19, mitochondrial OS=Homo sapiens OX=9606 GN=TTC19 PE=1 SV=4	4MGKH	Z	Tetratricopeptide repeat domain 19	-	-	-	-	-	-	-	-	-	row-28
transcript:ENST00000429968	transcript:ENST00000429968	1.91712	-12.9055	3.54652e-83	1.84064e-80	down	0	13.2634	0	1078	GO:0016607;GO:0048024;GO:0034451;GO:0005654;GO:0050733;GO:0006396;GO:0015630;GO:0032991;GO:0008380;GO:0003723;GO:1990446;GO:0006397;	CC;BP;CC;CC;MF;BP;CC;CC;BP;MF;MF;BP;	nuclear speck;regulation of mRNA splicing, via spliceosome;centriolar satellite;nucleoplasm;RS domain binding;RNA processing;microtubule cytoskeleton;protein-containing complex;RNA splicing;RNA binding;U1 snRNP binding;mRNA processing;	K13091	-	-	PREDICTED: RNA-binding protein 39 isoform X1 [Myotis davidii]	PF01853.22	MOZ/SAS family	RNA-binding protein 39 OS=Homo sapiens OX=9606 GN=RBM39 PE=1 SV=2	4KZPJ	A	RNA binding motif protein 39	-	-	-	-	KOG0147	[K]	Transcription;	Transcriptional coactivator CAPER (RRM superfamily)	-	row-29
transcript:ENST00000590558	transcript:ENST00000590558	1.72111	-12.9042	3.88028e-83	1.9489e-80	down	0	9.86951	0	1077	GO:0009725;GO:0001018;GO:0006508;GO:0005654;GO:0050730;GO:0005777;GO:0005739;GO:0019941;GO:0043565;GO:0017171;GO:0051603;GO:0042731;GO:0005759;GO:0006457;GO:0032042;GO:0000002;GO:0003697;GO:0004252;GO:0045732;GO:0016020;GO:0043560;GO:0006515;GO:0000262;GO:0043531;GO:0005524;GO:0034599;GO:0046627;GO:0004176;GO:0042802;GO:0070182;GO:0010044;GO:0001666;GO:0035694;GO:0051880;GO:0007005;GO:0030163;GO:…	BP;MF;BP;CC;BP;CC;CC;BP;MF;MF;BP;MF;CC;BP;BP;BP;MF;MF;BP;CC;MF;BP;CC;MF;MF;BP;BP;MF;MF;MF;BP;BP;BP;MF;BP;BP;BP;CC;BP;CC;MF;BP;BP;BP;BP;MF;	response to hormone;mitochondrial promoter sequence-specific DNA binding;proteolysis;nucleoplasm;regulation of peptidyl-tyrosine phosphorylation;peroxisome;mitochondrion;modification-dependent protein catabolic process;sequence-specific DNA binding;serine hydrolase activity;proteolysis involved in protein catabolic process;PH domain binding;mitochondrial matrix;protein folding;mitochondrial DNA m…	K08675	-	-	lon protease homolog, mitochondrial isoform X1 [Homo sapiens]	PF02190.20	ATP-dependent protease La (LON) substrate-binding domain	Lon protease homolog, mitochondrial OS=Homo sapiens OX=9606 GN=LONP1 PE=1 SV=2	4N1AP	L	Found in ATP-dependent protease La (LON)	-	-	-	-	KOG2004	[O]	Posttranslational modification, protein turnover, chaperones;	Mitochondrial ATP-dependent protease PIM1/LON	-	row-30
transcript:ENST00000456182	transcript:ENST00000456182	1.8387	-12.9028	4.24581e-83	2.06585e-80	down	0	11.794	0	1076	GO:0019899;GO:0016607;GO:0003729;GO:0071004;GO:0003723;GO:0006376;GO:0005685;	MF;CC;MF;CC;MF;BP;CC;	enzyme binding;nuclear speck;mRNA binding;U2-type prespliceosome;RNA binding;mRNA splice site recognition;U1 snRNP;	K13212	-	-	putative RNA-binding protein Luc7-like 2 isoform X3 [Mustela nigripes]	PF03194.19	LUC7 N_terminus	Putative RNA-binding protein Luc7-like 2 OS=Mus musculus OX=10090 GN=Luc7l2 PE=1 SV=1	48YYE	A	RNA-binding protein Luc7-like	-	-	-	-	KOG0796	[A]	RNA processing and modification;	Spliceosome subunit	-	row-31
transcript:ENST00000338163	transcript:ENST00000338163	3.13433	-5.0999	1.28619e-81	6.06848e-79	down	1.06657	36.3084	87	3834	GO:0006357;GO:0005681;GO:0015030;GO:2000767;GO:1990841;GO:0009631;GO:0006412;GO:0009651;GO:0048599;GO:0045314;GO:0043023;GO:0033592;GO:0016233;GO:0001893;GO:0043047;GO:0045296;GO:0005840;GO:0031047;GO:0001651;GO:0106002;GO:1990826;GO:0051168;GO:0061752;GO:0140517;GO:0035332;GO:0009579;GO:0005844;GO:0000184;GO:0097165;GO:0001558;GO:0005634;GO:0031370;GO:0006446;GO:0032211;GO:0017148;GO:0000398;GO:…	BP;CC;CC;BP;MF;BP;BP;BP;BP;BP;MF;MF;BP;BP;MF;MF;CC;BP;CC;CC;CC;BP;MF;MF;BP;CC;CC;BP;CC;BP;CC;MF;BP;BP;BP;BP;CC;BP;CC;MF;CC;CC;BP;BP;BP;BP;BP;MF;BP;BP;BP;BP;MF;MF;BP;CC;CC;BP;MF;CC;BP;BP;MF;MF;CC;BP;CC;MF;BP;CC;BP;MF;CC;BP;BP;BP;CC;MF;CC;BP;BP;MF;BP;CC;MF;CC;BP;CC;CC;CC;BP;MF;MF;CC;CC;BP;BP;BP;BP;CC;CC;BP;BP;CC;BP;BP;MF;BP;CC;CC;BP;BP;BP;BP;BP;MF;BP;BP;CC;CC;BP;CC;BP;CC;CC;BP;BP;MF;CC;CC;BP;CC;MF;…	regulation of transcription by RNA polymerase II;spliceosomal complex;Cajal body;positive regulation of cytoplasmic translation;promoter-specific chromatin binding;cold acclimation;translation;response to salt stress;oocyte development;regulation of compound eye photoreceptor development;ribosomal large subunit binding;RNA strand annealing activity;telomere capping;maternal placenta development;s…	K13091	-	-	RNA-binding protein 39 isoform X8 [Acinonyx jubatus]	PF00076.26	RNA recognition motif	RNA-binding protein 39 OS=Pongo abelii OX=9601 GN=RBM39 PE=2 SV=1	4J3RX	A	RNA binding motif protein 39	COG0724	RNA recognition motif (RRM) domain	J	Translation, ribosomal structure and biogenesis	KOG0147	[K]	Transcription;	Transcriptional coactivator CAPER (RRM superfamily)	-	row-32
transcript:ENST00000549143	transcript:ENST00000549143	1.63783	12.659	2.97192e-81	1.36097e-78	up	8.68437	0	708	0	-	-	-	-	-	-	-	PF05694.15	56kDa selenium binding protein (SBP56)	-	-	-	-	-	-	-	-	-	-	-	-	-	row-33
transcript:ENST00000337004	transcript:ENST00000337004	1.81597	-12.8257	3.87386e-81	1.72331e-78	down	0	11.3971	0	1020	GO:0016020;GO:0106245;GO:0016740;GO:0016780;GO:0106258;GO:0005789;GO:0012505;GO:0006659;	CC;MF;MF;MF;MF;CC;CC;BP;	membrane;L-serine-phosphatidylethanolamine phosphatidyltransferase activity;transferase activity;phosphotransferase activity, for other substituted phosphate groups;L-serine-phosphatidylcholine phosphatidyltransferase activity;endoplasmic reticulum membrane;endomembrane system;phosphatidylserine biosynthetic process;	K08729	ko00564;ko01100	Glycerophospholipid metabolism;Metabolic pathways	phosphatidylserine synthase 1 isoform X2 [Trachypithecus francoisi]	-	-	Phosphatidylserine synthase 1 OS=Homo sapiens OX=9606 GN=PTDSS1 PE=1 SV=1	4924X	I	phosphatidylserine biosynthetic process	-	-	-	-	KOG2735	[I]	Lipid transport and metabolism;	Phosphatidylserine synthase	-	row-34
transcript:ENST00000635944	transcript:ENST00000635944	1.86595	9.59893	2.82832e-80	1.22325e-77	up	12.124	0.012387	689	1	-	-	-	-	-	-	acid ceramidase isoform X2 [Marmota monax]	-	-	-	4M5ZK	O	N-acylsphingosine amidohydrolase (acid ceramidase) 1	-	-	-	-	-	-	-	-	-	row-35
gene:ENSG00000257390	RP11-762I7.5	1.97825	-12.787	3.81509e-80	1.60543e-77	down	0	14.5247	0	993	GO:0005681;GO:0005788;GO:0006508;GO:0035719;GO:0032781;GO:0033592;GO:0075512;GO:0017053;GO:0101031;GO:0006457;GO:0030183;GO:0005634;GO:0030433;GO:0016020;GO:0044167;GO:0000122;GO:0004197;GO:0019072;GO:0034641;GO:0070008;GO:0039654;GO:0051131;GO:0003724;GO:0065003;GO:0009958;GO:0051082;GO:0042026;GO:0031965;GO:0005856;GO:0009408;GO:0045892;GO:0008092;GO:0005654;GO:0008270;GO:0005783;GO:0048471;GO:…	CC;CC;BP;BP;BP;MF;BP;CC;CC;BP;BP;CC;BP;CC;CC;BP;MF;BP;BP;MF;BP;BP;MF;BP;BP;MF;BP;CC;CC;BP;BP;MF;CC;MF;CC;CC;BP;BP;CC;CC;CC;CC;MF;MF;CC;MF;BP;CC;BP;CC;MF;BP;BP;MF;CC;CC;BP;CC;BP;BP;MF;CC;BP;BP;CC;CC;BP;BP;CC;BP;MF;MF;CC;BP;CC;MF;CC;BP;MF;BP;BP;BP;BP;MF;CC;MF;MF;BP;MF;BP;BP;BP;MF;MF;BP;CC;BP;MF;BP;MF;MF;MF;BP;BP;CC;MF;CC;BP;BP;BP;MF;MF;BP;BP;MF;BP;BP;BP;MF;BP;BP;CC;	spliceosomal complex;endoplasmic reticulum lumen;proteolysis;tRNA import into nucleus;positive regulation of ATP-dependent activity;RNA strand annealing activity;clathrin-dependent endocytosis of virus by host cell;transcription repressor complex;protein folding chaperone complex;protein folding;B cell differentiation;nucleus;obsolete ubiquitin-dependent ERAD pathway;membrane;host cell endoplasmi…	K09534	-	-	dnaJ homolog subfamily C member 14 isoform X1 [Pan paniscus]	PF14901.10	Cleavage inducing molecular chaperone	DnaJ homolog subfamily C member 14 OS=Homo sapiens OX=9606 GN=DNAJC14 PE=2 SV=2	4MTY5	U	Cleavage inducing molecular chaperone	COG0484	DnaJ-class molecular chaperone with C-terminal Zn finger domain	O	Posttranslational modification, protein turnover, chaperones	KOG0720	[O]	Posttranslational modification, protein turnover, chaperones;	Molecular chaperone (DnaJ superfamily)	-	row-36
transcript:ENST00000588814	transcript:ENST00000588814	3.03056	-5.41516	4.22981e-79	1.73311e-76	down	0.831065	35.4648	42	2306	GO:0000165;GO:0002931;GO:0006913;GO:0032869;GO:0045862;GO:0000278;GO:0010019;GO:0009651;GO:0010614;GO:0097255;GO:0031371;GO:0101031;GO:0044877;GO:0019899;GO:0006457;GO:0030911;GO:0032436;GO:0070534;GO:0002230;GO:2000324;GO:0009734;GO:0005634;GO:0008361;GO:0030433;GO:0016020;GO:1901526;GO:0046982;GO:0000122;GO:0031398;GO:0030943;GO:0051865;GO:0080008;GO:0009611;GO:0051879;GO:0051131;GO:0045717;GO:…	BP;BP;BP;BP;BP;BP;BP;BP;BP;CC;CC;CC;MF;MF;BP;MF;BP;BP;BP;BP;BP;CC;BP;BP;CC;BP;MF;BP;BP;MF;BP;CC;BP;MF;BP;BP;BP;BP;CC;CC;CC;MF;CC;CC;BP;CC;BP;BP;BP;BP;CC;CC;MF;CC;MF;BP;BP;BP;BP;BP;CC;BP;BP;CC;BP;MF;CC;BP;CC;BP;BP;BP;CC;MF;BP;MF;MF;MF;CC;BP;CC;BP;CC;BP;BP;BP;MF;MF;CC;BP;CC;BP;CC;BP;MF;BP;BP;BP;CC;BP;BP;MF;BP;BP;CC;BP;CC;BP;MF;CC;CC;MF;MF;BP;BP;CC;CC;BP;CC;BP;BP;BP;MF;BP;CC;CC;MF;BP;BP;BP;BP;CC;BP;…	MAPK cascade;response to ischemia;nucleocytoplasmic transport;cellular response to insulin stimulus;positive regulation of proteolysis;mitotic cell cycle;chloroplast-nucleus signaling pathway;response to salt stress;negative regulation of cardiac muscle hypertrophy;R2TP complex;ubiquitin conjugating enzyme complex;protein folding chaperone complex;protein-containing complex binding;enzyme binding…	K09527	-	-	dnaJ homolog subfamily C member 7-like isoform X1 [Marmota monax]	PF00515.32	Tetratricopeptide repeat	DnaJ homolog subfamily C member 7 OS=Homo sapiens OX=9606 GN=DNAJC7 PE=1 SV=2	4MS79	O	Acts as co-chaperone regulating the molecular chaperones HSP70 and HSP90 in folding of steroid receptors, such as the glucocorticoid receptor and the progesterone receptor. Proposed to act as a recycling chaperone by facilitating the return of chaperone substrates to early stages of chaperoning if further folding is required. In vitro, induces ATP-independent dissociation of HSP90 but not of HSP7…	COG0457	Tetratricopeptide (TPR) repeat	R	General function prediction only	KOG0550	[O]	Posttranslational modification, protein turnover, chaperones;	Molecular chaperone (DnaJ superfamily)	-	row-37
transcript:ENST00000493815	transcript:ENST00000493815	1.91869	12.5358	4.22371e-78	1.68623e-75	up	13.2945	0	650	0	GO:0006357;GO:0043149;GO:0061049;GO:0043482;GO:0008307;GO:0006913;GO:0043197;GO:0035025;GO:0000045;GO:0003007;GO:0007166;GO:0035556;GO:0019899;GO:0005912;GO:0050890;GO:0019903;GO:0030950;GO:0005634;GO:0051496;GO:0001503;GO:0016020;GO:0004385;GO:0009986;GO:0014069;GO:0071889;GO:0008134;GO:0030036;GO:0030100;GO:0003190;GO:0045669;GO:0005080;GO:0030163;GO:0030335;GO:0009898;GO:0001726;GO:0003713;GO:…	BP;BP;BP;BP;MF;BP;CC;BP;BP;BP;BP;BP;MF;CC;BP;MF;BP;CC;BP;BP;CC;MF;CC;CC;MF;MF;BP;BP;BP;BP;MF;BP;BP;CC;CC;MF;BP;BP;BP;CC;CC;BP;MF;MF;CC;BP;CC;BP;BP;BP;BP;CC;BP;CC;BP;BP;CC;BP;CC;BP;BP;CC;MF;MF;CC;BP;BP;MF;BP;CC;BP;CC;MF;MF;BP;CC;MF;BP;BP;BP;BP;CC;CC;CC;CC;CC;BP;CC;CC;BP;CC;BP;CC;BP;BP;CC;BP;MF;CC;MF;CC;CC;CC;CC;BP;CC;CC;BP;CC;BP;CC;BP;CC;BP;CC;BP;BP;BP;BP;CC;CC;CC;CC;MF;MF;CC;BP;BP;MF;BP;CC;BP;CC;…	regulation of transcription by RNA polymerase II;stress fiber assembly;cell growth involved in cardiac muscle cell development;cellular pigment accumulation;structural constituent of muscle;nucleocytoplasmic transport;dendritic spine;positive regulation of Rho protein signal transduction;autophagosome assembly;heart morphogenesis;cell surface receptor signaling pathway;intracellular signal transd…	K19867	-	-	PDZ and LIM domain protein 7 isoform X3 [Pan paniscus]	PF00595.28	PDZ domain	PDZ and LIM domain protein 7 OS=Homo sapiens OX=9606 GN=PDLIM7 PE=1 SV=1	492T6	TZ	PDZ and LIM domain	-	-	-	-	KOG1703	[TZ]	Signal transduction mechanisms; Cytoskeleton;	Adaptor protein Enigma and related PDZ-LIM proteins	-	row-38
MSTRG.4099.3	MSTRG.4099.3	1.34678	12.5246	7.48399e-78	2.91314e-75	up	5.46909	0	645	0	GO:0005769;GO:0099638;GO:0042098;GO:0040038;GO:0043015;GO:0031274;GO:0042147;GO:0000145;GO:0031396;GO:0034314;GO:0005829;GO:0003779;GO:0043014;GO:0031625;GO:0045022;GO:0016197;GO:0022617;GO:2000010;GO:0031083;GO:0005768;GO:0034394;GO:0001556;GO:0034315;GO:0030833;GO:0015031;GO:0055037;GO:0055038;GO:0007032;GO:1904109;GO:0006887;GO:0071203;GO:0141039;GO:0002468;GO:0050776;GO:0010507;GO:0005776;GO:…	CC;BP;BP;BP;MF;BP;BP;CC;BP;BP;CC;MF;MF;MF;BP;BP;BP;BP;CC;CC;BP;BP;BP;BP;BP;CC;CC;BP;BP;BP;CC;MF;BP;BP;BP;CC;CC;CC;CC;CC;BP;CC;BP;CC;BP;MF;BP;BP;	early endosome;endosome to plasma membrane protein transport;T cell proliferation;polar body extrusion after meiotic divisions;gamma-tubulin binding;positive regulation of pseudopodium assembly;retrograde transport, endosome to Golgi;exocyst;regulation of protein ubiquitination;Arp2/3 complex-mediated actin nucleation;cytosol;actin binding;alpha-tubulin binding;ubiquitin protein ligase binding;ea…	-	hsa04144	Endocytosis	WASH complex subunit 1 isoform X7 [Homo sapiens]	PF11945.12	WAHD domain of WASH complex	WAS protein family homolog 6 OS=Homo sapiens OX=9606 GN=WASH6P PE=1 SV=3	4MTY0	Z	at the surface of endosomes, where it recruits and activates the Arp2 3 complex to induce actin polymerization, playing a key role in the fission of tubules that serve as transport intermediates during endosome sorting	-	-	-	-	-	-	-	-	-	row-39
transcript:ENST00000512070	transcript:ENST00000512070	0.900831	12.5179	1.18553e-77	4.50214e-75	up	2.48622	0	642	0	GO:0044295;GO:0051693;GO:0042119;GO:0048013;GO:0045296;GO:0035332;GO:0008361;GO:0048514;GO:0016020;GO:0031430;GO:0030424;GO:1904878;GO:0043065;GO:0030427;GO:0019904;GO:0032955;GO:0005547;GO:0043615;GO:0005856;GO:0007399;GO:0030010;GO:2000050;GO:0007411;GO:0043005;GO:0035176;GO:0043231;GO:0008017;GO:0051285;GO:1903561;GO:0007391;GO:0050803;GO:0060622;GO:0003779;GO:0012505;GO:0030027;GO:0032092;GO:…	CC;BP;BP;BP;MF;BP;BP;BP;CC;CC;CC;BP;BP;CC;MF;BP;MF;BP;CC;BP;BP;BP;BP;CC;BP;CC;MF;CC;CC;BP;BP;BP;MF;CC;CC;BP;MF;BP;BP;BP;CC;MF;BP;MF;CC;CC;BP;CC;BP;BP;BP;BP;CC;BP;BP;CC;BP;BP;BP;BP;CC;BP;BP;MF;CC;BP;BP;CC;BP;MF;BP;BP;CC;BP;CC;CC;MF;BP;BP;MF;MF;BP;MF;MF;BP;BP;BP;CC;CC;CC;MF;BP;BP;MF;MF;CC;BP;BP;CC;BP;BP;CC;BP;BP;BP;CC;BP;BP;BP;CC;CC;CC;MF;BP;BP;BP;CC;BP;MF;CC;BP;CC;CC;MF;CC;MF;CC;CC;MF;CC;MF;CC;CC;…	axonal growth cone;actin filament capping;neutrophil activation;ephrin receptor signaling pathway;cadherin binding;positive regulation of hippo signaling;regulation of cell size;blood vessel morphogenesis;membrane;M band;axon;negative regulation of calcium ion transmembrane transport via high voltage-gated calcium channel;positive regulation of apoptotic process;site of polarized growth;protein d…	K08810	-	-	triple functional domain protein isoform X1 [Homo sapiens]	PF16609.9	SH3-RhoGEF linking unstructured region	Triple functional domain protein OS=Homo sapiens OX=9606 GN=TRIO PE=1 SV=2	4MUZA	T	SH3-RhoGEF linking unstructured region	-	-	-	-	KOG4240	[T]	Signal transduction mechanisms;	Multidomain protein, contains SPEC repeats, PH, SH3, and separate rac-specific and rho-specific guanine nucleotide exchange factor domains	-	row-40
transcript:ENST00000603946	transcript:ENST00000603946	1.5532	-12.6878	1.33257e-77	4.94004e-75	down	0	7.61228	0	927	GO:0015030;GO:0001650;GO:0007409;GO:0030532;GO:0005654;GO:0005730;GO:0045893;GO:0000278;GO:0042306;GO:0031428;GO:0005525;GO:0140678;GO:0034513;GO:0005737;GO:0003723;GO:0048167;GO:0008139;GO:0062065;GO:0001093;GO:0046982;GO:0033979;GO:0005524;GO:0030674;GO:0014029;GO:0008284;GO:0014032;GO:0019904;GO:0004860;GO:0034512;GO:0062064;GO:0007000;GO:0031429;GO:0006417;GO:0006364;	CC;CC;BP;CC;CC;CC;BP;BP;BP;CC;MF;MF;MF;CC;MF;BP;MF;MF;MF;MF;BP;MF;MF;BP;BP;BP;MF;MF;MF;MF;BP;CC;BP;BP;	Cajal body;fibrillar center;axonogenesis;small nuclear ribonucleoprotein complex;nucleoplasm;nucleolus;positive regulation of DNA-templated transcription;mitotic cell cycle;regulation of protein import into nucleus;box C/D methylation guide snoRNP complex;GTP binding;molecular function inhibitor activity;box H/ACA snoRNA binding;cytoplasm;RNA binding;regulation of synaptic plasticity;nuclear loca…	K25818	-	-	nucleolar and coiled-body phosphoprotein 1 isoform X4 [Pongo pygmaeus]	PF08513.15	LisH	Nucleolar and coiled-body phosphoprotein 1 OS=Homo sapiens OX=9606 GN=NOLC1 PE=1 SV=2	4MSF6	Y	SRP40, C-terminal domain	-	-	-	-	-	-	-	-	-	row-41
transcript:ENST00000457259	transcript:ENST00000457259	1.85283	-12.6548	8.53468e-77	3.09035e-74	down	0	12.0472	0	906	GO:0005743;GO:0031410;GO:0005739;GO:0034551;	CC;CC;CC;BP;	mitochondrial inner membrane;cytoplasmic vesicle;mitochondrion;mitochondrial respiratory chain complex III assembly;	K17662	-	-	ubiquinol-cytochrome-c reductase complex assembly factor 1 isoform X2 [Homo sapiens]	-	-	Ubiquinol-cytochrome c reductase complex assembly factor 1 OS=Homo sapiens OX=9606 GN=UQCC1 PE=1 SV=3	4N21I	C	Ubiquinol-cytochrome C chaperone	-	-	-	-	KOG2873	[C]	Energy production and conversion;	Ubiquinol cytochrome c reductase assembly protein CBP3	-	row-42
transcript:ENST00000467167	transcript:ENST00000467167	1.76224	-12.6307	3.33514e-76	1.18019e-73	down	0	10.5074	0	891	GO:0071466;GO:0019856;GO:0005829;GO:0004588;GO:0007595;GO:0042802;GO:0044205;GO:0006225;GO:0005737;GO:0006207;GO:0006222;GO:0016036;GO:0045335;GO:0000287;GO:0007565;GO:0044206;GO:0005634;GO:0004590;GO:0004845;	BP;BP;CC;MF;BP;MF;BP;BP;CC;BP;BP;BP;CC;MF;BP;BP;CC;MF;MF;	cellular response to xenobiotic stimulus;pyrimidine nucleobase biosynthetic process;cytosol;orotate phosphoribosyltransferase activity;lactation;identical protein binding;'de novo' UMP biosynthetic process;UDP biosynthetic process;cytoplasm;'de novo' pyrimidine nucleobase biosynthetic process;UMP biosynthetic process;cellular response to phosphate starvation;phagocytic vesicle;magnesium ion bindi…	K13421	ko00240;ko00983;ko01100	Pyrimidine metabolism;Drug metabolism - other enzymes;Metabolic pathways	uridine 5'-monophosphate synthase [Homo sapiens]	-	-	Uridine 5'-monophosphate synthase OS=Homo sapiens OX=9606 GN=UMPS PE=1 SV=1	4N5DD	F	orotate phosphoribosyltransferase activity	COG0461	Orotate phosphoribosyltransferase	F	Nucleotide transport and metabolism	KOG1377	[F]	Nucleotide transport and metabolism;	Uridine 5'- monophosphate synthase/orotate phosphoribosyltransferase	-	row-43
transcript:ENST00000599255	transcript:ENST00000599255	2.53722	-12.5197	2.06937e-73	7.16002e-71	down	0	32.6943	0	825	GO:0006915;GO:0005886;GO:0032060;	BP;CC;BP;	apoptotic process;plasma membrane;bleb assembly;	K26257	-	-	PREDICTED: epithelial membrane protein 3 [Colobus angolensis palliatus]	PF00822.24	PMP-22/EMP/MP20/Claudin family	Epithelial membrane protein 3 OS=Homo sapiens OX=9606 GN=EMP3 PE=1 SV=1	4MXAW	U	PMP-22/EMP/MP20/Claudin family	-	-	-	-	-	-	-	-	-	row-44
transcript:ENST00000496241	transcript:ENST00000496241	1.92003	12.3234	7.70573e-73	2.60822e-70	up	13.321	0	561	0	GO:0005788;GO:0009753;GO:0042761;GO:0019915;GO:0021670;GO:0009736;GO:0006974;GO:2001140;GO:0005634;GO:0031982;GO:0050826;GO:0016020;GO:0055092;GO:0006914;GO:0016863;GO:0031154;GO:0004860;GO:0042049;GO:0036151;GO:0005654;GO:0032791;GO:0005739;GO:0009062;GO:0005783;GO:0005938;GO:0008289;GO:0009416;GO:0030156;GO:0043292;GO:0043231;GO:0046889;GO:0005737;GO:0009536;GO:0006631;GO:0005576;GO:0009409;GO:…	CC;BP;BP;BP;BP;BP;BP;BP;CC;CC;BP;CC;BP;BP;MF;BP;MF;BP;BP;CC;MF;CC;BP;CC;CC;MF;BP;MF;CC;CC;BP;CC;CC;BP;CC;BP;BP;BP;CC;BP;BP;CC;BP;BP;CC;CC;MF;CC;CC;CC;BP;CC;BP;BP;BP;BP;MF;BP;BP;BP;CC;MF;CC;BP;MF;CC;BP;BP;BP;BP;BP;CC;CC;CC;BP;BP;BP;BP;MF;BP;BP;BP;BP;BP;BP;BP;MF;BP;BP;BP;BP;MF;	endoplasmic reticulum lumen;response to jasmonic acid;very long-chain fatty acid biosynthetic process;lipid storage;lateral ventricle development;cytokinin-activated signaling pathway;DNA damage response;positive regulation of phospholipid transport;nucleus;vesicle;response to freezing;membrane;sterol homeostasis;autophagy;intramolecular oxidoreductase activity, transposing C=C bonds;culmination …	K13239	ko04146;ko00071	Peroxisome;Fatty acid degradation	enoyl-CoA delta isomerase 2 isoform X3 [Pan paniscus]	PF00887.23	Acyl CoA binding protein	Enoyl-CoA delta isomerase 2 OS=Homo sapiens OX=9606 GN=ECI2 PE=1 SV=4	4MZBB	I	Acyl CoA binding protein	COG4281	Acyl-CoA-binding protein	I	Lipid transport and metabolism	KOG0817	[I]	Lipid transport and metabolism;	Acyl-CoA-binding protein	-	row-45
transcript:ENST00000532170	transcript:ENST00000532170	1.9316	-5.84731	1.56786e-72	5.19395e-70	down	0.195873	11.169	18	1338	GO:0008656;GO:0006281;GO:0046704;GO:0006264;GO:0005739;GO:0009265;GO:0009202;GO:0043025;GO:0061731;GO:0000731;GO:0042246;GO:0009185;GO:0005737;GO:0060041;GO:0005634;GO:0097718;GO:0021846;GO:1900087;GO:0005524;GO:0042802;GO:0004748;GO:0006206;GO:0070318;GO:0042995;GO:0006235;GO:0000166;GO:0010212;GO:0006260;GO:0051290;GO:0031288;GO:0005829;GO:0005971;GO:0010971;GO:0005635;GO:0006240;GO:0017076;GO:…	MF;BP;BP;BP;CC;BP;BP;CC;MF;BP;BP;BP;CC;BP;CC;MF;BP;BP;MF;MF;MF;BP;BP;CC;BP;MF;BP;BP;BP;BP;CC;CC;BP;CC;BP;MF;BP;BP;	cysteine-type endopeptidase activator activity involved in apoptotic process;DNA repair;CDP metabolic process;mitochondrial DNA replication;mitochondrion;2'-deoxyribonucleotide biosynthetic process;deoxyribonucleoside triphosphate biosynthetic process;neuronal cell body;ribonucleoside-diphosphate reductase activity;DNA synthesis involved in DNA repair;tissue regeneration;ribonucleoside diphosphat…	K10807	ko00230;ko01100;ko00983;ko00480;ko00240	Purine metabolism;Metabolic pathways;Drug metabolism - other enzymes;Glutathione metabolism;Pyrimidine metabolism	ribonucleoside-diphosphate reductase large subunit isoform X7 [Pipistrellus kuhlii]	PF03477.20	ATP cone domain	Ribonucleoside-diphosphate reductase large subunit OS=Pongo abelii OX=9601 GN=RRM1 PE=2 SV=1	48Y78	F	Provides the precursors necessary for DNA synthesis. Catalyzes the biosynthesis of deoxyribonucleotides from the corresponding ribonucleotides	COG0209	Ribonucleotide reductase alpha subunit	F	Nucleotide transport and metabolism	KOG1112	[F]	Nucleotide transport and metabolism;	Ribonucleotide reductase, alpha subunit	-	row-46
gene:ENSG00000254692	RP11-468E2.1	1.49784	12.3078	1.90606e-72	6.18279e-70	up	6.97607	0	555	0	GO:0000137;GO:0001778;GO:1904669;GO:0036258;GO:0140220;GO:0030587;GO:0010908;GO:0005828;GO:0032466;GO:0045296;GO:0008333;GO:0016236;GO:0009624;GO:0005771;GO:0005634;GO:0031982;GO:0016020;GO:0010324;GO:0014069;GO:0036178;GO:0006914;GO:0070863;GO:0009898;GO:0005768;GO:0140460;GO:0036438;GO:0010824;GO:0010506;GO:0070072;GO:0010467;GO:0031902;GO:0016322;GO:0061763;GO:0009838;GO:0006620;GO:0090543;GO:…	CC;BP;BP;BP;CC;BP;BP;CC;BP;MF;BP;BP;BP;CC;CC;CC;CC;BP;CC;BP;BP;BP;CC;CC;BP;BP;BP;BP;BP;BP;CC;BP;BP;BP;BP;CC;BP;CC;BP;MF;BP;BP;BP;BP;CC;CC;MF;CC;CC;CC;CC;BP;CC;BP;BP;CC;CC;BP;BP;BP;CC;MF;MF;CC;BP;BP;CC;CC;CC;CC;BP;CC;BP;CC;BP;CC;BP;BP;BP;BP;BP;BP;CC;CC;CC;CC;BP;BP;CC;CC;BP;BP;BP;CC;CC;BP;BP;BP;MF;BP;BP;CC;CC;CC;BP;BP;BP;BP;CC;CC;BP;CC;BP;BP;CC;BP;BP;BP;CC;CC;BP;BP;BP;CC;BP;BP;BP;BP;BP;BP;CC;BP;BP;…	Golgi cis cisterna;plasma membrane repair;ATP export;multivesicular body assembly;pathogen-containing vacuole;sorocarp development;regulation of heparan sulfate proteoglycan biosynthetic process;kinetochore microtubule;negative regulation of cytokinesis;cadherin binding;endosome to lysosome transport;macroautophagy;response to nematode;multivesicular body;nucleus;vesicle;membrane;membrane invagin…	K17085	-	-	transmembrane 9 superfamily member 1 isoform X1 [Tursiops truncatus]	PF02990.20	Endomembrane protein 70	Transmembrane 9 superfamily member 1 OS=Homo sapiens OX=9606 GN=TM9SF1 PE=2 SV=2	4N15B	U	process utilizing autophagic mechanism	-	-	-	-	KOG1277	[U]	Intracellular trafficking, secretion, and vesicular transport;	Endosomal membrane proteins, EMP70	-	row-47
gene:ENSG00000185885	IFITM1	2.65629	6.37034	4.27576e-72	1.35864e-69	up	28.9185	0.328328	718	11	GO:0051607;GO:0007507;GO:0035456;GO:0005783;GO:0007166;GO:0005886;GO:0030282;GO:0048471;GO:0009952;GO:0006955;GO:0043231;GO:0030500;GO:0045177;GO:0001756;GO:0030336;GO:0031901;GO:0005737;GO:0005634;GO:0001503;GO:0032897;GO:0016020;GO:0035455;GO:0009986;GO:0008285;GO:0009615;GO:0031410;GO:0001701;GO:0032991;GO:0045669;GO:0005769;GO:0035458;GO:0005829;GO:0060349;GO:0060337;GO:0005765;GO:0046597;GO:…	BP;BP;BP;CC;BP;CC;BP;CC;BP;BP;CC;BP;CC;BP;BP;CC;CC;CC;BP;BP;CC;BP;CC;BP;BP;CC;BP;CC;BP;CC;BP;CC;BP;BP;CC;BP;BP;CC;BP;BP;	defense response to virus;heart development;response to interferon-beta;endoplasmic reticulum;cell surface receptor signaling pathway;plasma membrane;bone mineralization;perinuclear region of cytoplasm;anterior/posterior pattern specification;immune response;intracellular membrane-bounded organelle;regulation of bone mineralization;apical part of cell;somitogenesis;negative regulation of cell mig…	K19831	ko04662	B cell receptor signaling pathway	interferon-induced transmembrane protein 1 [Homo sapiens]	PF04505.16	Interferon-induced transmembrane protein	Interferon-induced transmembrane protein 1 OS=Homo sapiens OX=9606 GN=IFITM1 PE=1 SV=3	4N6NH	T	Interferon-induced transmembrane protein	-	-	-	-	-	-	-	-	-	row-48
transcript:ENST00000392021	transcript:ENST00000392021	1.37226	12.2843	7.05161e-72	2.19587e-69	up	5.70166	0	546	0	GO:0051607;GO:0034274;GO:0000045;GO:0016236;GO:0034045;GO:0021766;GO:0039689;GO:0120095;GO:0005737;GO:0051020;GO:0034497;GO:0098792;GO:0043495;GO:0042802;GO:0022038;GO:0005776;GO:0005930;GO:0010508;GO:0000421;GO:0036020;GO:0019787;GO:0005829;GO:0016237;GO:0015031;GO:0006501;GO:0097225;	BP;CC;BP;BP;CC;BP;BP;CC;CC;MF;BP;BP;MF;MF;BP;CC;CC;BP;CC;CC;MF;CC;BP;BP;BP;CC;	defense response to virus;Atg12-Atg5-Atg16 complex;autophagosome assembly;macroautophagy;phagophore assembly site membrane;hippocampus development;negative stranded viral RNA replication;vacuole-isolation membrane contact site;cytoplasm;GTPase binding;protein localization to phagophore assembly site;xenophagy;protein-membrane adaptor activity;identical protein binding;corpus callosum development;…	K17890	ko04136;ko04621;ko04140	Autophagy - other;NOD-like receptor signaling pathway;Autophagy - animal	autophagy-related protein 16-1 isoform X3 [Symphalangus syndactylus]	PF08614.15	Autophagy protein 16 (ATG16)	Autophagy-related protein 16-1 OS=Pongo abelii OX=9601 GN=ATG16L1 PE=2 SV=1	4MYJK	S	process utilizing autophagic mechanism	-	-	-	-	KOG0288	[R]	General function prediction only;	WD40 repeat protein TipD	-	row-49
transcript:ENST00000547475	transcript:ENST00000547475	3.55062	-5.30259	1.4314e-71	4.36997e-69	down	1.41051	55.9614	33	1677	GO:0070062;GO:0042273;GO:0030425;GO:1904628;GO:0098793;GO:0005925;GO:0043009;GO:0005654;GO:0006284;GO:0000027;GO:0000055;GO:0005730;GO:0046686;GO:0005811;GO:0006412;GO:0032040;GO:0005783;GO:0005794;GO:0022626;GO:0071353;GO:0071320;GO:0030687;GO:0005840;GO:0009506;GO:0044877;GO:0007595;GO:0010043;GO:0002181;GO:0005737;GO:0042788;GO:0003723;GO:0031012;GO:0010269;GO:0005634;GO:0098794;GO:0022625;GO:…	CC;BP;CC;BP;CC;CC;BP;CC;BP;BP;BP;CC;BP;CC;BP;CC;CC;CC;CC;BP;BP;CC;CC;CC;MF;BP;BP;BP;CC;CC;MF;CC;BP;CC;CC;CC;CC;CC;CC;MF;CC;CC;BP;BP;CC;MF;BP;BP;MF;MF;CC;BP;MF;MF;CC;BP;MF;CC;MF;BP;MF;MF;MF;BP;BP;	extracellular exosome;ribosomal large subunit biogenesis;dendrite;cellular response to phorbol 13-acetate 12-myristate;presynapse;focal adhesion;chordate embryonic development;nucleoplasm;base-excision repair;ribosomal large subunit assembly;ribosomal large subunit export from nucleus;nucleolus;response to cadmium ion;lipid droplet;translation;small-subunit processome;endoplasmic reticulum;Golgi …	K02941	ko03010	Ribosome	PREDICTED: 60S acidic ribosomal protein P0-like isoform X3 [Lipotes vexillifer]	PF00466.24	Ribosomal protein L10	Large ribosomal subunit protein uL10 OS=Oryctolagus cuniculus OX=9986 GN=RPLP0 PE=1 SV=3	4PVT1	J	ribosome biogenesis	COG0244	Ribosomal protein L10	J	Translation, ribosomal structure and biogenesis	KOG0815	[J]	Translation, ribosomal structure and biogenesis;	60S acidic ribosomal protein P0	-	row-50
transcript:ENST00000635175	transcript:ENST00000635175	2.56372	-5.73153	6.43185e-71	1.92584e-68	down	0.425384	23.5234	19	1303	-	-	-	-	-	-	LOW QUALITY PROTEIN: septin-7 [Chlorocebus sabaeus]	-	-	-	-	-	-	-	-	-	-	-	-	-	-	-	row-51
transcript:ENST00000529920	transcript:ENST00000529920	3.29048	-5.37787	2.06724e-70	6.07299e-68	down	1.06941	45.2612	28	1500	GO:0005925;GO:0098793;GO:1990090;GO:0005654;GO:0005730;GO:0005739;GO:0006412;GO:1990932;GO:0022626;GO:0005886;GO:0005840;GO:0043231;GO:0016740;GO:0002181;GO:0005737;GO:0042788;GO:0003723;GO:0031012;GO:0005773;GO:0005634;GO:0098794;GO:0022625;GO:0016020;GO:0019843;GO:0015934;GO:1990904;GO:0014069;GO:0045202;GO:0140242;GO:0000325;GO:0031090;GO:0003735;GO:0005829;GO:0003729;GO:0140236;	CC;CC;BP;CC;CC;CC;BP;MF;CC;CC;CC;CC;MF;BP;CC;CC;MF;CC;CC;CC;CC;CC;CC;MF;CC;CC;CC;CC;BP;CC;CC;MF;CC;MF;BP;	focal adhesion;presynapse;cellular response to nerve growth factor stimulus;nucleoplasm;nucleolus;mitochondrion;translation;5.8S rRNA binding;cytosolic ribosome;plasma membrane;ribosome;intracellular membrane-bounded organelle;transferase activity;cytoplasmic translation;cytoplasm;obsolete polysomal ribosome;RNA binding;extracellular matrix;vacuole;nucleus;postsynapse;cytosolic large ribosomal su…	K02938	ko03010	Ribosome	60S ribosomal protein L8 isoform X1 [Lutra lutra]	PF03947.22	Ribosomal Proteins L2, C-terminal domain	Large ribosomal subunit protein uL2 OS=Rattus norvegicus OX=10116 GN=Rpl8 PE=2 SV=2	4Q04N	J	ribosomal protein	COG0090	Ribosomal protein L2	J	Translation, ribosomal structure and biogenesis	KOG2309	[J]	Translation, ribosomal structure and biogenesis;	60s ribosomal protein L2/L8	-	row-52
transcript:ENST00000488746	transcript:ENST00000488746	2.50875	-12.3353	2.35465e-70	6.78923e-68	down	0	31.3907	0	726	GO:0032755;GO:0042098;GO:0005783;GO:0005794;GO:0006816;GO:0005886;GO:1990266;GO:0006979;GO:0042102;GO:0018345;GO:0002230;GO:1902624;GO:0072678;GO:0050848;GO:0045728;GO:0070059;GO:0042802;GO:0051649;GO:0005789;GO:0032760;GO:0032469;GO:0032722;GO:0071639;GO:0051223;GO:2000406;GO:0010742;	BP;BP;CC;CC;BP;CC;BP;BP;BP;BP;BP;BP;BP;BP;BP;BP;MF;BP;CC;BP;BP;BP;BP;BP;BP;BP;	positive regulation of interleukin-6 production;T cell proliferation;endoplasmic reticulum;Golgi apparatus;calcium ion transport;plasma membrane;neutrophil migration;response to oxidative stress;positive regulation of T cell proliferation;protein palmitoylation;positive regulation of defense response to virus by host;positive regulation of neutrophil migration;T cell migration;regulation of calci…	-	-	-	selenoprotein K isoform X1 [Microcebus murinus]	PF10961.12	Selenoprotein SelK_SelG	Selenoprotein K OS=Macaca fascicularis OX=9541 GN=SELENOK PE=3 SV=3	4N7BH	P	Selenoprotein SelK_SelG	-	-	-	-	-	-	-	-	-	row-53
transcript:ENST00000563961	transcript:ENST00000563961	1.15589	12.2194	2.6336e-70	7.45549e-68	up	3.96494	0	522	0	GO:0035616;GO:0075342;GO:0006283;GO:0006508;GO:0005654;GO:0051090;GO:0016579;GO:1901537;GO:0042752;GO:0005694;GO:1904262;GO:0044027;GO:1901796;GO:0002039;GO:0140673;GO:0035520;GO:0032088;GO:0005737;GO:0001741;GO:0005634;GO:0031647;GO:1990380;GO:0101005;GO:1904353;GO:0016605;GO:0004197;GO:0042802;GO:0032991;GO:0004843;GO:0016604;GO:0045721;GO:0048511;GO:0043065;GO:0005829;GO:0016567;GO:1905279;GO:…	BP;BP;BP;BP;CC;BP;BP;BP;BP;CC;BP;BP;BP;MF;BP;BP;BP;CC;CC;CC;BP;MF;MF;BP;CC;MF;MF;CC;MF;CC;BP;BP;BP;CC;BP;BP;BP;BP;	obsolete histone H2B conserved C-terminal lysine deubiquitination;symbiont-mediated disruption of host cell PML body;transcription-coupled nucleotide-excision repair;proteolysis;nucleoplasm;regulation of DNA-binding transcription factor activity;protein deubiquitination;obsolete positive regulation of DNA demethylation;regulation of circadian rhythm;chromosome;negative regulation of TORC1 signali…	K11838	ko05203;ko05169;ko04068	Viral carcinogenesis;Epstein-Barr virus infection;FoxO signaling pathway	ubiquitin carboxyl-terminal hydrolase 7 isoform 1 [Homo sapiens]	-	-	Ubiquitin carboxyl-terminal hydrolase 7 OS=Homo sapiens OX=9606 GN=USP7 PE=1 SV=2	4MZMT	O	ICP0-binding domain of Ubiquitin-specific protease 7	-	-	-	-	KOG1863	[O]	Posttranslational modification, protein turnover, chaperones;	Ubiquitin carboxyl-terminal hydrolase	-	row-54
transcript:ENST00000550053	transcript:ENST00000550053	2.56606	-4.479	6.19155e-70	1.72147e-67	down	0.824543	18.2207	140	4010	GO:0031083;GO:0005768;GO:0016197;GO:0005654;GO:0071203;GO:0006887;GO:0044655;GO:0007032;GO:0015031;GO:0030041;GO:0061462;GO:0031901;GO:0034315;GO:0140591;GO:0061474;	CC;CC;BP;CC;CC;BP;BP;BP;BP;BP;BP;CC;BP;BP;CC;	BLOC-1 complex;endosome;endosomal transport;nucleoplasm;WASH complex;exocytosis;phagosome reneutralization;endosome organization;protein transport;actin filament polymerization;protein localization to lysosome;early endosome membrane;regulation of Arp2/3 complex-mediated actin nucleation;nuclear envelope budding;phagolysosome membrane;	K18465	ko04144	Endocytosis	PREDICTED: WASH complex subunit SWIP-like [Bos indicus]	PF14745.10	WASH complex subunit 4, N-terminal	WASH complex subunit 4 OS=Homo sapiens OX=9606 GN=WASHC4 PE=1 SV=2	491F1	S	WASH complex subunit	-	-	-	-	KOG3578	[S]	Function unknown;	Uncharacterized conserved protein	-	row-55
transcript:ENST00000555840	transcript:ENST00000555840	1.5299	12.1745	3.17188e-69	8.66424e-67	up	7.33855	0	506	0	GO:0090727;GO:0070830;GO:0005739;GO:0005794;GO:0005886;GO:0048471;GO:1905516;GO:0031966;GO:0046662;GO:0004930;GO:2000654;GO:0005634;GO:0005385;GO:0016020;GO:0006882;GO:0071577;GO:0007343;GO:0005497;GO:0022883;GO:0006829;GO:0005802;GO:0048515;GO:1905562;	BP;BP;CC;CC;CC;CC;BP;CC;BP;MF;BP;CC;MF;CC;BP;BP;BP;MF;MF;BP;CC;BP;BP;	positive regulation of brood size;bicellular tight junction assembly;mitochondrion;Golgi apparatus;plasma membrane;perinuclear region of cytoplasm;positive regulation of fertilization;mitochondrial membrane;regulation of egg-laying behavior;G protein-coupled receptor activity;regulation of cellular response to testosterone stimulus;nucleus;zinc ion transmembrane transporter activity;membrane;intr…	K14715	-	-	zinc transporter ZIP9 isoform X1 [Pan paniscus]	PF02535.26	ZIP Zinc transporter	Zinc transporter ZIP9 OS=Homo sapiens OX=9606 GN=SLC39A9 PE=1 SV=2	4N1NA	P	solute carrier family 39	COG0428	Zinc transporter ZupT	P	Inorganic ion transport and metabolism	KOG3907	[U]	Intracellular trafficking, secretion, and vesicular transport;	ZIP-like zinc transporter proteins	-	row-56
transcript:ENST00000430182	transcript:ENST00000430182	3.77859	-4.38036	3.63217e-69	9.75051e-67	down	2.54215	52.1705	177	4734	GO:0006418;GO:0005829;GO:0043066;GO:0048813;GO:0005524;GO:0004860;GO:0007420;GO:0006469;GO:0032873;GO:0004819;GO:0032991;GO:0005737;GO:0003723;GO:0017101;GO:2001234;GO:0006425;GO:0019901;GO:0005759;GO:0045892;	BP;CC;BP;BP;MF;MF;BP;BP;BP;MF;CC;CC;MF;CC;BP;BP;MF;CC;BP;	tRNA aminoacylation for protein translation;cytosol;negative regulation of apoptotic process;dendrite morphogenesis;ATP binding;protein kinase inhibitor activity;brain development;negative regulation of protein kinase activity;negative regulation of stress-activated MAPK cascade;glutamine-tRNA ligase activity;protein-containing complex;cytoplasm;RNA binding;aminoacyl-tRNA synthetase multienzyme c…	K01886	ko00970;ko01100	Aminoacyl-tRNA biosynthesis;Metabolic pathways	glutamine--tRNA ligase [Pan troglodytes]	PF04558.19	Glutaminyl-tRNA synthetase, non-specific RNA binding region part 1	Glutamine--tRNA ligase OS=Homo sapiens OX=9606 GN=QARS1 PE=1 SV=1	4N0J4	J	Belongs to the class-I aminoacyl-tRNA synthetase family	-	-	-	-	KOG1148	[J]	Translation, ribosomal structure and biogenesis;	Glutaminyl-tRNA synthetase	-	row-57
transcript:ENST00000447802	transcript:ENST00000447802	1.60822	-7.61273	8.42236e-68	2.22265e-65	down	0.039609	7.94077	3	781	GO:0030951;GO:0006357;GO:0007409;GO:0007492;GO:0031234;GO:0060048;GO:0003714;GO:0072659;GO:0048013;GO:0030507;GO:0140947;GO:0010765;GO:0046843;GO:0045296;GO:0031047;GO:0035556;GO:0045944;GO:2000651;GO:0019899;GO:0000786;GO:0038180;GO:0086091;GO:0045838;GO:0098904;GO:0090314;GO:0036371;GO:0055117;GO:0051386;GO:0018345;GO:0006325;GO:1903147;GO:0090212;GO:0070972;GO:0071709;GO:0005634;GO:0061629;GO:…	BP;BP;BP;BP;CC;BP;MF;BP;BP;MF;MF;BP;BP;MF;BP;BP;BP;BP;MF;CC;BP;BP;BP;BP;BP;BP;BP;BP;BP;BP;BP;BP;BP;BP;CC;MF;BP;MF;BP;BP;CC;MF;BP;BP;CC;BP;CC;CC;BP;CC;CC;BP;BP;BP;BP;CC;BP;MF;BP;BP;BP;BP;CC;MF;BP;CC;BP;BP;CC;MF;CC;CC;BP;CC;BP;BP;BP;BP;BP;MF;BP;BP;MF;CC;BP;BP;BP;CC;BP;CC;BP;MF;CC;BP;CC;BP;BP;MF;BP;BP;CC;CC;BP;MF;BP;CC;BP;BP;BP;BP;CC;BP;BP;BP;MF;CC;BP;BP;CC;CC;BP;MF;BP;BP;BP;CC;CC;BP;CC;CC;BP;BP;CC;…	establishment or maintenance of microtubule cytoskeleton polarity;regulation of transcription by RNA polymerase II;axonogenesis;endoderm development;extrinsic component of cytoplasmic side of plasma membrane;cardiac muscle contraction;transcription corepressor activity;protein localization to plasma membrane;ephrin receptor signaling pathway;spectrin binding;histone H3K9me2 methyltransferase acti…	K24633	-	-	PREDICTED: ankyrin repeat and MYND domain-containing protein 2 [Colobus angolensis palliatus]	PF13637.10	Ankyrin repeats (many copies)	Ankyrin repeat and MYND domain-containing protein 2 OS=Homo sapiens OX=9606 GN=ANKMY2 PE=1 SV=1	4M9BC	S	Ankyrin repeat and MYND	COG0666	Ankyrin repeat	T	Signal transduction mechanisms	KOG1710	[R]	General function prediction only;	MYND Zn-finger and ankyrin repeat protein	-	row-58
gene:ENSG00000277957	gene:ENSG00000277957	5.8365	-4.02746	2.69875e-67	7.00325e-65	down	19.3128	159.751	972	20346	GO:0031397;GO:0016055;GO:0005925;GO:0006508;GO:0010228;GO:0005654;GO:0007507;GO:0005730;GO:0009651;GO:0060707;GO:0016925;GO:0009950;GO:0007049;GO:0032880;GO:0051028;GO:0009506;GO:0045944;GO:2000765;GO:0005643;GO:0044877;GO:0070646;GO:0030111;GO:0019538;GO:0010724;GO:0043161;GO:0090169;GO:0006919;GO:0009909;GO:0016926;GO:0005737;GO:0060712;GO:0032875;GO:0005634;GO:0009792;GO:2000045;GO:0016607;GO:…	BP;BP;CC;BP;BP;CC;BP;CC;BP;BP;BP;BP;BP;BP;BP;CC;BP;BP;CC;MF;BP;BP;BP;BP;BP;BP;BP;BP;BP;CC;BP;BP;CC;BP;BP;CC;BP;BP;BP;CC;CC;BP;BP;MF;MF;CC;BP;CC;MF;BP;CC;BP;CC;BP;BP;BP;CC;BP;MF;BP;CC;BP;BP;BP;MF;BP;MF;MF;CC;BP;	negative regulation of protein ubiquitination;Wnt signaling pathway;focal adhesion;proteolysis;vegetative to reproductive phase transition of meristem;nucleoplasm;heart development;nucleolus;response to salt stress;trophoblast giant cell differentiation;protein sumoylation;dorsal/ventral axis specification;cell cycle;regulation of protein localization;mRNA transport;plasmodesma;positive regulatio…	K08593	-	-	sentrin-specific protease 3 [Homo sapiens]	PF02902.23	Ulp1 protease family, C-terminal catalytic domain	Sentrin-specific protease 3 OS=Homo sapiens OX=9606 GN=SENP3 PE=1 SV=2	4MUFI	O	Ulp1 protease family, C-terminal catalytic domain	-	-	-	-	KOG0778	[O]	Posttranslational modification, protein turnover, chaperones;	Protease, Ulp1 family	-	row-59
transcript:ENST00000588198	transcript:ENST00000588198	2.65874	5.42862	5.31128e-67	1.35568e-64	up	24.681	0.552782	810	24	GO:0006508;GO:0070828;GO:0006968;GO:1902455;GO:0001530;GO:0006953;GO:0007166;GO:0097110;GO:0004720;GO:0038024;GO:0019899;GO:0030858;GO:0048703;GO:0005912;GO:2000329;GO:0002456;GO:0043627;GO:0002438;GO:1904399;GO:0043152;GO:0010033;GO:0005634;GO:0030301;GO:0006879;GO:0009897;GO:0016020;GO:0009986;GO:0005604;GO:0030424;GO:0000122;GO:0002065;GO:0005581;GO:0035375;GO:1903661;GO:0031638;GO:0051879;GO:…	BP;BP;BP;BP;MF;BP;BP;MF;MF;MF;MF;BP;BP;CC;BP;BP;BP;BP;MF;BP;BP;CC;BP;BP;CC;CC;CC;CC;CC;BP;BP;CC;MF;BP;BP;MF;BP;MF;CC;BP;CC;BP;CC;BP;BP;CC;CC;BP;BP;CC;BP;MF;BP;MF;CC;BP;BP;BP;BP;MF;CC;BP;CC;MF;BP;CC;CC;BP;CC;CC;BP;BP;BP;BP;BP;BP;BP;BP;BP;MF;BP;MF;CC;CC;BP;BP;MF;BP;BP;BP;CC;CC;MF;MF;BP;BP;BP;MF;CC;BP;BP;CC;BP;BP;CC;MF;BP;BP;CC;MF;BP;BP;CC;CC;MF;BP;CC;BP;BP;BP;BP;BP;MF;BP;BP;MF;MF;BP;BP;CC;CC;CC;BP;…	proteolysis;heterochromatin organization;cellular defense response;negative regulation of stem cell population maintenance;lipopolysaccharide binding;acute-phase response;cell surface receptor signaling pathway;scaffold protein binding;protein-lysine 6-oxidase activity;cargo receptor activity;enzyme binding;positive regulation of epithelial cell differentiation;embryonic viscerocranium morphogene…	K17300	-	-	galectin-3-binding protein precursor [Homo sapiens]	PF00530.22	Scavenger receptor cysteine-rich domain	Galectin-3-binding protein OS=Homo sapiens OX=9606 GN=LGALS3BP PE=1 SV=1	4MTRZ	W	BTB And C-terminal Kelch	-	-	-	-	-	-	-	-	-	row-60
transcript:ENST00000546172	transcript:ENST00000546172	2.25184	7.25305	1.7082e-66	4.2898e-64	up	19.4953	0.106847	492	4	-	-	-	-	-	-	tRNA:m(4)X modification enzyme TRM13 homolog isoform X5 [Pongo abelii]	-	-	Putative phosphatidylinositol 3,4,5-trisphosphate 3-phosphatase TPTE2P1 OS=Homo sapiens OX=9606 GN=TPTE2P1 PE=5 SV=1	4MN5N	T	EF-hand, calcium binding motif	-	-	-	-	-	-	-	-	-	row-61
transcript:ENST00000359766	transcript:ENST00000359766	1.55844	-5.63751	1.81344e-66	4.48178e-64	down	0.128624	6.68643	17	1093	GO:0006886;GO:0005654;GO:0007059;GO:0005882;GO:0035556;GO:0048471;GO:0006974;GO:0006325;GO:0005634;GO:0051647;GO:0018105;GO:0010507;GO:0004674;GO:0106310;GO:0016310;GO:0005524;GO:0042802;GO:0071480;GO:1902275;GO:0007283;GO:0006468;GO:0030154;GO:0005856;GO:0032435;	BP;CC;BP;CC;BP;CC;BP;BP;CC;BP;BP;BP;MF;MF;BP;MF;MF;BP;BP;BP;BP;BP;CC;BP;	intracellular protein transport;nucleoplasm;chromosome segregation;intermediate filament;intracellular signal transduction;perinuclear region of cytoplasm;DNA damage response;chromatin organization;nucleus;nucleus localization;peptidyl-serine phosphorylation;negative regulation of autophagy;protein serine/threonine kinase activity;protein serine kinase activity;phosphorylation;ATP binding;identic…	K08864	-	-	serine/threonine-protein kinase tousled-like 1 [Octodon degus]	-	-	Serine/threonine-protein kinase tousled-like 1 OS=Homo sapiens OX=9606 GN=TLK1 PE=1 SV=2	4Q1MG	T	Serine/Threonine protein kinases, catalytic domain	-	-	-	-	KOG1151	[T]	Signal transduction mechanisms;	Tousled-like protein kinase	-	row-62
transcript:ENST00000614063	transcript:ENST00000614063	1.27941	-12.1602	3.91478e-66	9.52391e-64	down	0	4.89226	0	643	GO:0005975;GO:0006282;GO:0006974;GO:0005829;GO:0005654;GO:0004649;GO:0045739;GO:1990966;GO:0016045;GO:0003682;GO:0005737;GO:0016604;GO:0006287;GO:0005634;GO:0000785;GO:0009225;GO:0005759;	BP;BP;BP;CC;CC;MF;BP;BP;BP;MF;CC;CC;BP;CC;CC;BP;CC;	carbohydrate metabolic process;regulation of DNA repair;DNA damage response;cytosol;nucleoplasm;poly(ADP-ribose) glycohydrolase activity;positive regulation of DNA repair;ATP generation from poly-ADP-D-ribose;detection of bacterium;chromatin binding;cytoplasm;nuclear body;base-excision repair, gap-filling;nucleus;chromatin;nucleotide-sugar metabolic process;mitochondrial matrix;	K07759	-	-	poly(ADP-ribose) glycohydrolase isoform X2 [Homo sapiens]	-	-	Poly(ADP-ribose) glycohydrolase OS=Homo sapiens OX=9606 GN=PARG PE=1 SV=1	4MV7A	T	Poly (ADP-ribose) glycohydrolase (PARG)	-	-	-	-	KOG2064	[T]	Signal transduction mechanisms;	Poly(ADP-ribose) glycohydrolase	-	row-63
transcript:ENST00000605891	transcript:ENST00000605891	1.73585	-12.1489	6.80738e-66	1.63063e-63	down	0	10.0939	0	638	GO:0005654;GO:0061630;GO:0046872;GO:0043162;GO:0004842;GO:0008270;GO:0071629;GO:0043161;GO:0000209;GO:0005737;GO:0042127;GO:0070534;GO:0005634;GO:0051865;GO:0070936;GO:0006511;GO:0005829;GO:0016567;GO:0005154;GO:0006513;GO:0042147;GO:0042059;	CC;MF;MF;BP;MF;MF;BP;BP;BP;CC;BP;BP;CC;BP;BP;BP;CC;BP;MF;BP;BP;BP;	nucleoplasm;ubiquitin protein ligase activity;metal ion binding;ubiquitin-dependent protein catabolic process via the multivesicular body sorting pathway;ubiquitin-protein transferase activity;zinc ion binding;cytoplasm protein quality control by the ubiquitin-proteasome system;proteasome-mediated ubiquitin-dependent protein catabolic process;protein polyubiquitination;cytoplasm;regulation of cel…	K11982	-	-	E3 ubiquitin-protein ligase RNF126 isoform X1 [Homo sapiens]	PF14369.10	zinc-ribbon	E3 ubiquitin-protein ligase RNF126 OS=Homo sapiens OX=9606 GN=RNF126 PE=1 SV=2	4N3NE	O	zinc-ribbon	-	-	-	-	KOG0799	[G]	Carbohydrate transport and metabolism;	Branching enzyme	-	row-64
gene:ENSG00000268975	gene:ENSG00000268975	1.4209	12.0276	1.11449e-65	2.62919e-63	up	6.16918	0	457	0	GO:0070971;GO:0042546;GO:0140220;GO:0036258;GO:0030140;GO:0030587;GO:0000922;GO:0072659;GO:0005828;GO:0062160;GO:0000045;GO:0045296;GO:0032465;GO:0005628;GO:0051286;GO:1990261;GO:0016236;GO:0030911;GO:1902017;GO:0090726;GO:0001944;GO:0007030;GO:0016192;GO:0033298;GO:0048868;GO:0046907;GO:0090387;GO:0005634;GO:0031982;GO:0005771;GO:0009792;GO:0061175;GO:0005819;GO:0090619;GO:0016020;GO:0035773;GO:…	CC;BP;CC;BP;CC;BP;CC;BP;CC;CC;BP;MF;BP;CC;CC;BP;BP;MF;BP;CC;BP;BP;BP;BP;BP;BP;BP;CC;CC;CC;BP;CC;CC;CC;CC;BP;CC;BP;BP;BP;BP;BP;BP;CC;BP;BP;BP;MF;CC;BP;BP;BP;CC;CC;BP;MF;BP;BP;CC;CC;BP;CC;BP;BP;BP;BP;CC;BP;BP;BP;BP;BP;MF;BP;BP;BP;BP;CC;MF;CC;CC;CC;BP;BP;CC;CC;CC;CC;CC;BP;MF;CC;CC;CC;MF;CC;BP;CC;BP;CC;BP;CC;CC;CC;CC;BP;BP;CC;CC;BP;CC;MF;CC;CC;CC;BP;MF;BP;BP;BP;BP;BP;BP;CC;BP;CC;BP;CC;CC;BP;BP;BP;BP;…	endoplasmic reticulum exit site;cell wall biogenesis;pathogen-containing vacuole;multivesicular body assembly;trans-Golgi network transport vesicle;sorocarp development;spindle pole;protein localization to plasma membrane;kinetochore microtubule;spongiome;autophagosome assembly;cadherin binding;regulation of cytokinesis;prospore membrane;cell tip;pre-mRNA catabolic process;macroautophagy;TPR doma…	K07880	-	-	ras-related protein Rab-4B isoform X1 [Vulpes vulpes]	PF00071.26	Ras family	Ras-related protein Rab-4B OS=Homo sapiens OX=9606 GN=RAB4B PE=1 SV=1	4IXKJ	U	RAB4B, member RAS oncogene family	COG1100	GTPase SAR1 family domain	R	General function prediction only	KOG0086	[U]	Intracellular trafficking, secretion, and vesicular transport;	GTPase Rab4, small G protein superfamily	-	row-65
transcript:ENST00000424699	transcript:ENST00000424699	2.29624	-5.66513	1.17881e-65	2.73941e-63	down	0.329085	17.1519	16	1049	GO:0005622;GO:0070578;GO:0031054;GO:0070918;GO:0042474;GO:0009047;GO:0019899;GO:0050689;GO:0030422;GO:0051489;GO:0005634;GO:0098795;GO:0016020;GO:0030424;GO:0009615;GO:0003725;GO:0016604;GO:0043583;GO:0008298;GO:0035264;GO:0031965;GO:0010494;GO:0005654;GO:0035197;GO:0048592;GO:0005783;GO:0048471;GO:0043005;GO:0061003;GO:0005737;GO:0036002;GO:0010586;GO:0045070;GO:1990124;GO:0070922;GO:2001244;GO:…	CC;CC;BP;BP;BP;BP;MF;BP;BP;BP;CC;BP;CC;CC;BP;MF;CC;BP;BP;BP;CC;CC;CC;MF;BP;CC;CC;CC;BP;CC;MF;BP;BP;CC;BP;BP;MF;BP;CC;CC;BP;MF;BP;CC;CC;BP;CC;BP;BP;BP;BP;MF;BP;BP;BP;MF;BP;CC;BP;MF;CC;CC;MF;BP;MF;BP;BP;MF;BP;BP;BP;BP;BP;BP;BP;BP;BP;BP;MF;MF;MF;BP;MF;BP;MF;BP;BP;CC;BP;BP;MF;	intracellular anatomical structure;RISC-loading complex;pre-miRNA processing;regulatory ncRNA processing;middle ear morphogenesis;dosage compensation by hyperactivation of X chromosome;enzyme binding;negative regulation of defense response to virus by host;siRNA processing;regulation of filopodium assembly;nucleus;global gene silencing by mRNA cleavage;membrane;axon;response to virus;double-stran…	K24540	-	-	interferon-inducible double-stranded RNA-dependent protein kinase activator A isoform X1 [Homo sapiens]	PF00035.30	Double-stranded RNA binding motif	Interferon-inducible double-stranded RNA-dependent protein kinase activator A OS=Homo sapiens OX=9606 GN=PRKRA PE=1 SV=1	4MXV5	KU	Protein kinase, interferon-inducible double stranded RNA dependent activator	-	-	-	-	KOG3732	[UK]	Intracellular trafficking, secretion, and vesicular transport; Transcription;	Staufen and related double-stranded-RNA-binding proteins	-	row-66
transcript:ENST00000546531	transcript:ENST00000546531	2.51598	-5.20471	3.082e-65	7.05687e-63	down	0.543455	20.1973	27	1283	GO:0006110;GO:0005977;GO:0005654;GO:0045860;GO:0004672;GO:0006633;GO:0006754;GO:0008607;GO:0008603;GO:0035556;GO:0044877;GO:0007165;GO:0016126;GO:0005615;GO:0006469;GO:0004691;GO:0005737;GO:0031588;GO:0031669;GO:0016208;GO:0004862;GO:0005634;GO:0051170;GO:0019217;GO:0046324;GO:0014873;GO:0016020;GO:0046320;GO:0043531;GO:0010800;GO:0005524;GO:0030295;GO:0006096;GO:0010628;GO:0032991;GO:0019887;GO:…	BP;BP;CC;BP;MF;BP;BP;MF;MF;BP;MF;BP;BP;CC;BP;MF;CC;CC;BP;MF;MF;CC;BP;BP;BP;BP;CC;BP;MF;BP;MF;MF;BP;BP;CC;MF;MF;CC;BP;BP;BP;MF;	regulation of glycolytic process;glycogen metabolic process;nucleoplasm;positive regulation of protein kinase activity;protein kinase activity;fatty acid biosynthetic process;ATP biosynthetic process;phosphorylase kinase regulator activity;cAMP-dependent protein kinase regulator activity;intracellular signal transduction;protein-containing complex binding;signal transduction;sterol biosynthetic p…	K07200	ko04922;ko04152;ko04931;ko04932;ko04920;ko04921;ko05410;ko04910;ko04211;ko04710;ko04530;ko04068;ko04714;ko04371;ko04213	Glucagon signaling pathway;AMPK signaling pathway;Insulin resistance;Non-alcoholic fatty liver disease;Adipocytokine signaling pathway;Oxytocin signaling pathway;Hypertrophic cardiomyopathy;Insulin signaling pathway;Longevity regulating pathway;Circadian rhythm;Tight junction;FoxO signaling pathway;Thermogenesis;Apelin signaling pathway;Longevity regulating pathway - multiple species	5'-AMP-activated protein kinase subunit gamma-1 [Saimiri boliviensis boliviensis]	-	-	5'-AMP-activated protein kinase subunit gamma-1 OS=Homo sapiens OX=9606 GN=PRKAG1 PE=1 SV=1	4M8MU	C	Protein kinase, AMP-activated, gamma 1 non-catalytic subunit	-	-	-	-	KOG1764	[C]	Energy production and conversion;	5'-AMP-activated protein kinase, gamma subunit	-	row-67
transcript:ENST00000456458	transcript:ENST00000456458	1.68281	-12.0936	1.30829e-64	2.95219e-62	down	0	9.30745	0	614	GO:0051607;GO:0005654;GO:0005739;GO:0005783;GO:0006248;GO:0008253;GO:0016740;GO:0046079;GO:0005737;GO:0006249;GO:0106411;GO:0046085;GO:0016604;GO:0046050;GO:0009117;GO:0000166;GO:0000215;GO:0005829;GO:0006213;GO:0000287;GO:0046074;	BP;CC;CC;CC;BP;MF;MF;BP;CC;BP;MF;BP;CC;BP;BP;MF;MF;CC;BP;MF;BP;	defense response to virus;nucleoplasm;mitochondrion;endoplasmic reticulum;CMP catabolic process;5'-nucleotidase activity;transferase activity;dUMP catabolic process;cytoplasm;dCMP catabolic process;XMP 5'-nucleosidase activity;adenosine metabolic process;nuclear body;UMP catabolic process;nucleotide metabolic process;nucleotide binding;tRNA 2'-phosphotransferase activity;cytosol;pyrimidine nucleo…	K24242	ko01100;ko00230;ko00240;ko00760	Metabolic pathways;Purine metabolism;Pyrimidine metabolism;Nicotinate and nicotinamide metabolism	cytosolic 5'-nucleotidase 3A isoform X1 [Chlorocebus sabaeus]	PF11377.12	Protein of unknown function (DUF3180)	Cytosolic 5'-nucleotidase 3A OS=Homo sapiens OX=9606 GN=NT5C3A PE=1 SV=3	4MW4V	F	Belongs to the pyrimidine 5'-nucleotidase family	-	-	-	-	-	-	-	-	-	row-68
MSTRG.4099.1	MSTRG.4099.1	1.18664	-12.0065	1.40895e-62	3.13391e-60	down	0	4.1812	0	578	GO:0005769;GO:0099638;GO:0042098;GO:0040038;GO:0043015;GO:0031274;GO:0042147;GO:0000145;GO:0031396;GO:0034314;GO:0005829;GO:0003779;GO:0043014;GO:0031625;GO:0045022;GO:0016197;GO:0022617;GO:2000010;GO:0031083;GO:0005768;GO:0034394;GO:0001556;GO:0034315;GO:0030833;GO:0015031;GO:0055037;GO:0055038;GO:0007032;GO:1904109;GO:0006887;GO:0071203;GO:0141039;GO:0002468;GO:0050776;GO:0010507;GO:0005776;GO:…	CC;BP;BP;BP;MF;BP;BP;CC;BP;BP;CC;MF;MF;MF;BP;BP;BP;BP;CC;CC;BP;BP;BP;BP;BP;CC;CC;BP;BP;BP;CC;MF;BP;BP;BP;CC;CC;CC;CC;CC;BP;CC;BP;CC;BP;MF;BP;BP;	early endosome;endosome to plasma membrane protein transport;T cell proliferation;polar body extrusion after meiotic divisions;gamma-tubulin binding;positive regulation of pseudopodium assembly;retrograde transport, endosome to Golgi;exocyst;regulation of protein ubiquitination;Arp2/3 complex-mediated actin nucleation;cytosol;actin binding;alpha-tubulin binding;ubiquitin protein ligase binding;ea…	-	hsa04144	Endocytosis	WASH complex subunit 1 isoform X7 [Homo sapiens]	PF11945.12	WAHD domain of WASH complex	WAS protein family homolog 6 OS=Homo sapiens OX=9606 GN=WASH6P PE=1 SV=3	4MTY0	Z	at the surface of endosomes, where it recruits and activates the Arp2 3 complex to induce actin polymerization, playing a key role in the fission of tubules that serve as transport intermediates during endosome sorting	-	-	-	-	-	-	-	-	-	row-69
gene:ENSG00000256500	RP11-73M18.2	1.37339	11.8886	1.83909e-62	4.03304e-60	up	5.7122	0	415	0	GO:0007601;GO:0010228;GO:0046843;GO:0045296;GO:0071908;GO:0040011;GO:0032418;GO:0043227;GO:0008088;GO:0005634;GO:0031982;GO:0000302;GO:0016020;GO:0097363;GO:0035469;GO:0030424;GO:0009910;GO:0003774;GO:0007005;GO:0003777;GO:0016757;GO:0016787;GO:0060026;GO:0048489;GO:0006996;GO:1903427;GO:0030473;GO:0006886;GO:0005654;GO:0005739;GO:0060027;GO:0010906;GO:0043005;GO:0060993;GO:0120317;GO:0003283;GO:…	BP;BP;BP;MF;BP;BP;BP;CC;BP;CC;CC;BP;CC;MF;BP;CC;BP;MF;BP;MF;MF;MF;BP;BP;BP;BP;BP;BP;CC;CC;BP;BP;CC;BP;BP;BP;CC;BP;CC;MF;CC;BP;BP;BP;CC;MF;BP;CC;BP;BP;CC;CC;CC;BP;CC;BP;BP;CC;BP;CC;CC;BP;BP;BP;BP;BP;BP;CC;BP;BP;CC;BP;BP;CC;BP;BP;CC;MF;BP;BP;BP;BP;BP;BP;BP;CC;BP;MF;BP;BP;BP;CC;MF;BP;CC;CC;BP;CC;BP;BP;BP;BP;CC;BP;BP;CC;CC;BP;BP;BP;	visual perception;vegetative to reproductive phase transition of meristem;dorsal appendage formation;cadherin binding;determination of intestine left/right asymmetry;locomotion;lysosome localization;membrane-bounded organelle;axo-dendritic transport;nucleus;vesicle;response to reactive oxygen species;membrane;protein O-acetylglucosaminyltransferase activity;determination of pancreatic left/right …	K10407	ko05132	Salmonella infection	PREDICTED: kinesin light chain 1 isoform X1 [Colobus angolensis palliatus]	PF13424.10	Tetratricopeptide repeat	Kinesin light chain 1 OS=Pongo abelii OX=9601 GN=KLC1 PE=2 SV=3	4MXYR	Z	Tetratricopeptide repeat	COG0457	Tetratricopeptide (TPR) repeat	R	General function prediction only	KOG1840	[Z]	Cytoskeleton;	Kinesin light chain	-	row-70
transcript:ENST00000432789	transcript:ENST00000432789	1.84493	6.06895	4.68962e-60	1.01043e-57	up	10.2986	0.142186	478	9	GO:0006139;GO:0006384;GO:0005666;GO:0043231;GO:0005654;GO:0005829;GO:0003899;GO:0051607;GO:0045087;GO:0006383;GO:0005813;GO:0003677;GO:0031090;	BP;BP;CC;CC;CC;CC;MF;BP;BP;BP;CC;MF;CC;	nucleobase-containing compound metabolic process;transcription initiation at RNA polymerase III promoter;RNA polymerase III complex;intracellular membrane-bounded organelle;nucleoplasm;cytosol;DNA-directed 5'-3' RNA polymerase activity;defense response to virus;innate immune response;transcription by RNA polymerase III;centrosome;DNA binding;organelle membrane;	K03022	ko04623;ko03020	Cytosolic DNA-sensing pathway;RNA polymerase	PREDICTED: DNA-directed RNA polymerase III subunit RPC8 [Rhinopithecus bieti]	PF03876.21	SHS2 domain found in N terminus of Rpb7p/Rpc25p/MJ0397	DNA-directed RNA polymerase III subunit RPC8 OS=Homo sapiens OX=9606 GN=POLR3H PE=1 SV=1	494X8	K	transcription initiation from RNA polymerase III promoter	-	-	-	-	KOG3297	[K]	Transcription;	DNA-directed RNA polymerase subunit E'	-	row-71
transcript:ENST00000560451	transcript:ENST00000560451	0.923225	11.7841	4.73741e-60	1.01043e-57	up	2.59614	0	386	0	GO:0001889;GO:0070062;GO:0000137;GO:0042538;GO:0035010;GO:0005654;GO:0048046;GO:0030587;GO:0006013;GO:0008270;GO:0046872;GO:0005794;GO:0030246;GO:0005783;GO:0009313;GO:0016799;GO:0007585;GO:0005615;GO:0019082;GO:0008496;GO:0048286;GO:0043231;GO:0005795;GO:0005537;GO:0004572;GO:0005797;GO:0031012;GO:0005773;GO:0032009;GO:0016020;GO:0005801;GO:0005576;GO:0004559;GO:0001701;GO:0015923;GO:0042802;GO:…	BP;CC;CC;BP;BP;CC;CC;BP;BP;MF;MF;CC;MF;CC;BP;MF;BP;CC;BP;MF;BP;CC;CC;MF;MF;CC;CC;CC;CC;CC;CC;CC;MF;BP;MF;MF;BP;BP;CC;BP;MF;BP;CC;MF;BP;BP;BP;CC;BP;CC;CC;BP;CC;CC;CC;BP;BP;CC;	liver development;extracellular exosome;Golgi cis cisterna;hyperosmotic salinity response;encapsulation of foreign target;nucleoplasm;apoplast;sorocarp development;mannose metabolic process;zinc ion binding;metal ion binding;Golgi apparatus;carbohydrate binding;endoplasmic reticulum;oligosaccharide catabolic process;hydrolase activity, hydrolyzing N-glycosyl compounds;respiratory gaseous exchange…	K01231	ko01100;ko00510	Metabolic pathways;N-Glycan biosynthesis	alpha-mannosidase 2x isoform X4 [Homo sapiens]	PF01074.26	Glycosyl hydrolases family 38 N-terminal domain	Alpha-mannosidase 2x OS=Homo sapiens OX=9606 GN=MAN2A2 PE=2 SV=3	4MX8B	G	Alpha mannosidase, middle domain	COG0383	Alpha-mannosidase	G	Carbohydrate transport and metabolism	KOG1958	[G]	Carbohydrate transport and metabolism;	Glycosyl hydrolase, family 38 - alpha-mannosidase	-	row-72
gene:ENSG00000130487	KLHDC7B	2.27782	4.37354	3.99858e-59	8.41323e-57	up	13.4363	0.629021	1165	72	GO:0046329;GO:0005681;GO:0032465;GO:0097602;GO:0032436;GO:0005912;GO:0001887;GO:0061629;GO:0005634;GO:0005819;GO:0016020;GO:0097718;GO:0014069;GO:0009615;GO:0030424;GO:0030036;GO:0031208;GO:0051865;GO:0031463;GO:0030723;GO:0007628;GO:0006895;GO:1990756;GO:0007626;GO:0045886;GO:0010506;GO:0007015;GO:0007297;GO:0019964;GO:0005856;GO:0045604;GO:0005654;GO:0071322;GO:0007507;GO:0032886;GO:0005783;GO:…	BP;CC;BP;MF;BP;CC;BP;MF;CC;CC;CC;MF;CC;BP;CC;BP;MF;BP;CC;BP;BP;BP;MF;BP;BP;BP;BP;BP;MF;CC;BP;CC;BP;BP;BP;CC;BP;CC;CC;CC;CC;CC;CC;CC;CC;BP;BP;CC;MF;BP;CC;CC;CC;BP;MF;BP;BP;CC;BP;BP;BP;CC;MF;BP;BP;BP;BP;BP;CC;BP;BP;BP;CC;MF;BP;BP;CC;BP;CC;CC;BP;BP;BP;BP;MF;BP;CC;BP;BP;CC;BP;BP;BP;CC;CC;BP;CC;MF;CC;BP;BP;BP;BP;CC;BP;BP;CC;BP;BP;CC;CC;BP;BP;CC;BP;BP;	negative regulation of JNK cascade;spliceosomal complex;regulation of cytokinesis;cullin family protein binding;positive regulation of proteasomal ubiquitin-dependent protein catabolic process;adherens junction;selenium compound metabolic process;RNA polymerase II-specific DNA-binding transcription factor binding;nucleus;spindle;membrane;disordered domain specific binding;postsynaptic density;res…	-	-	-	kelch domain-containing protein 7B [Homo sapiens]	PF01344.29	Kelch motif	Kelch domain-containing protein 7B OS=Homo sapiens OX=9606 GN=KLHDC7B PE=1 SV=2	4N50A	S	Kelch	COG3055	N-acetylneuraminic acid mutarotase	M	Cell wall/membrane/envelope biogenesis	KOG1071	[J]	Translation, ribosomal structure and biogenesis;	Mitochondrial translation elongation factor EF-Tsmt, catalyzes nucleotide exchange on EF-Tumt	-	row-73
transcript:ENST00000517597	transcript:ENST00000517597	1.95326	11.6994	3.94204e-58	8.18368e-56	up	13.9962	0	364	0	GO:0008670;GO:0006635;GO:0005829;GO:0005654;GO:0005739;GO:0042802;GO:0070402;GO:0120162;GO:1902494;GO:0005634;GO:0005759;	MF;BP;CC;CC;CC;MF;MF;BP;CC;CC;CC;	2,4-dienoyl-CoA reductase (NADPH) activity;fatty acid beta-oxidation;cytosol;nucleoplasm;mitochondrion;identical protein binding;NADPH binding;positive regulation of cold-induced thermogenesis;catalytic complex;nucleus;mitochondrial matrix;	K13236	-	-	2,4-dienoyl-CoA reductase [(3E)-enoyl-CoA-producing], mitochondrial [Pan troglodytes]	-	-	2,4-dienoyl-CoA reductase [(3E)-enoyl-CoA-producing], mitochondrial OS=Homo sapiens OX=9606 GN=DECR1 PE=1 SV=1	4N17P	Q	KR domain	-	-	-	-	KOG0725	[R]	General function prediction only;	Reductases with broad range of substrate specificities	-	row-74
MSTRG.7258.2	MSTRG.7258.2	1.08976	-11.7887	1.26519e-57	2.59198e-55	down	0	3.53001	0	497	GO:0019901;GO:0030155;GO:0019904;GO:0060170;GO:0000139;GO:0051216;GO:0007160;GO:0005634;GO:0043588;GO:0070588;GO:0060428;GO:0009986;GO:0031514;GO:0044325;GO:0050982;GO:0036303;GO:0072218;GO:0034405;GO:0016328;GO:0140416;GO:0007507;GO:0005261;GO:0072164;GO:0160040;GO:0016020;GO:0006807;GO:0006816;GO:0072205;GO:0090162;GO:0001701;GO:0060236;GO:0001568;GO:0034703;GO:0098609;GO:0021510;GO:0005794;GO:…	MF;BP;MF;CC;CC;BP;BP;CC;BP;BP;BP;CC;CC;MF;BP;BP;BP;BP;CC;MF;BP;MF;BP;BP;CC;BP;BP;BP;BP;BP;BP;BP;CC;BP;BP;CC;BP;BP;BP;BP;CC;CC;MF;BP;CC;BP;BP;BP;BP;BP;BP;BP;MF;CC;BP;CC;CC;BP;BP;BP;CC;CC;BP;BP;BP;CC;BP;BP;CC;BP;BP;BP;MF;BP;	protein kinase binding;regulation of cell adhesion;protein domain specific binding;ciliary membrane;Golgi membrane;cartilage development;cell-matrix adhesion;nucleus;skin development;calcium ion transmembrane transport;lung epithelium development;cell surface;motile cilium;transmembrane transporter binding;detection of mechanical stimulus;lymph vessel morphogenesis;metanephric ascending thin limb…	-	H00542	O-Antigen repeat unit biosynthesis	polycystin-1 isoform X14 [Homo sapiens]	PF00801.24	PKD domain	Polycystin-1 OS=Homo sapiens OX=9606 GN=PKD1 PE=1 SV=3	4N2ZA	T	Polycystin 1, transient receptor potential channel interacting	-	-	-	-	KOG3599	[PT]	Inorganic ion transport and metabolism; Signal transduction mechanisms;	Ca2+-modulated nonselective cation channel polycystin	-	row-75
transcript:ENST00000636534	transcript:ENST00000636534	2.19363	4.8539	8.47647e-57	1.71401e-54	up	13.4869	0.444515	679	30	GO:0005730;	CC;	nucleolus;	-	-	-	ras-related protein Rab-34 isoform NARR [Homo sapiens]	-	-	Ras-related protein Rab-34, isoform NARR OS=Homo sapiens OX=9606 GN=RAB34 PE=1 SV=1	49DPW	E	glucose:sodium symporter activity	-	-	-	-	-	-	-	-	-	row-76
transcript:ENST00000580033	transcript:ENST00000580033	2.30343	-11.7505	9.67306e-57	1.93089e-54	down	0	23.3671	0	484	GO:0070062;GO:0005504;GO:0035023;GO:0071526;GO:1901164;GO:0005096;GO:0005092;GO:0032880;GO:0005886;GO:0003924;GO:0001835;GO:0005615;GO:0001772;GO:0030336;GO:0005737;GO:0030695;GO:0007162;GO:0008360;GO:0005634;GO:0016020;GO:0045202;GO:0031410;GO:0071260;GO:0098693;GO:0005094;GO:0031267;GO:0051879;GO:0005829;GO:0043066;GO:0005856;GO:0071461;GO:0007266;GO:0071407;GO:0019901;GO:0098685;	CC;MF;BP;BP;BP;MF;MF;BP;CC;MF;BP;CC;CC;BP;CC;MF;BP;BP;CC;CC;CC;CC;BP;BP;MF;MF;MF;CC;BP;CC;BP;BP;BP;MF;CC;	extracellular exosome;fatty acid binding;regulation of Rho protein signal transduction;semaphorin-plexin signaling pathway;negative regulation of trophoblast cell migration;GTPase activator activity;GDP-dissociation inhibitor activity;regulation of protein localization;plasma membrane;GTPase activity;blastocyst hatching;extracellular space;immunological synapse;negative regulation of cell migrati…	K12462	ko04962;ko04722	Vasopressin-regulated water reabsorption;Neurotrophin signaling pathway	rho GDP-dissociation inhibitor 1 isoform X2 [Nomascus leucogenys]	PF02115.21	RHO protein GDP dissociation inhibitor	Rho GDP-dissociation inhibitor 1 OS=Macaca fascicularis OX=9541 GN=ARHGDIA PE=2 SV=1	4MBET	T	Rho GDP-dissociation inhibitor activity	-	-	-	-	KOG3205	[T]	Signal transduction mechanisms;	Rho GDP-dissociation inhibitor	-	row-77
transcript:ENST00000421671	transcript:ENST00000421671	1.33878	-11.7234	3.2308e-56	6.36754e-54	down	0	5.3977	0	475	GO:0016020;GO:0035914;GO:0030514;GO:0006998;GO:0005635;GO:0031490;GO:0060914;GO:0051898;GO:0005737;GO:0022008;GO:0043409;GO:0005637;GO:0071168;GO:0005783;GO:0031965;GO:0000785;GO:0005819;	CC;BP;BP;BP;CC;MF;BP;BP;CC;BP;BP;CC;BP;CC;CC;CC;CC;	membrane;skeletal muscle cell differentiation;negative regulation of BMP signaling pathway;nuclear envelope organization;nuclear envelope;chromatin DNA binding;heart formation;negative regulation of phosphatidylinositol 3-kinase/protein kinase B signal transduction;cytoplasm;neurogenesis;negative regulation of MAPK cascade;nuclear inner membrane;protein localization to chromatin;endoplasmic retic…	K24080	-	-	LEM domain-containing protein 2 isoform 3 [Homo sapiens]	PF03020.19	LEM domain	LEM domain-containing protein 2 OS=Homo sapiens OX=9606 GN=LEMD2 PE=1 SV=1	4N1T3	U	in nuclear membrane-associated proteins	-	-	-	-	-	-	-	-	-	row-78
transcript:ENST00000557802	transcript:ENST00000557802	0.995032	-11.7173	4.57214e-56	8.89853e-54	down	0	2.97255	0	473	GO:0016567;GO:0005654;GO:0043161;GO:0080008;	BP;CC;BP;CC;	protein ubiquitination;nucleoplasm;proteasome-mediated ubiquitin-dependent protein catabolic process;Cul4-RING E3 ubiquitin ligase complex;	-	-	-	PREDICTED: DDB1- and CUL4-associated factor 11 isoform X2 [Bos mutus]	-	-	DDB1- and CUL4-associated factor 11 OS=Bos taurus OX=9913 GN=DCAF11 PE=2 SV=1	4KUDV	S	DDB1- and CUL4-associated factor 11 isoform X1	-	-	-	-	-	-	-	-	-	row-79
transcript:ENST00000564558	transcript:ENST00000564558	1.00234	6.3531	6.96639e-56	1.3391e-53	up	2.88474	0.033015	391	6	GO:0006357;GO:0015629;GO:0051607;GO:0005654;GO:0005730;GO:0003714;GO:0045893;GO:0008270;GO:0046872;GO:0003677;GO:0043565;GO:0001228;GO:0045944;GO:1990837;GO:0007030;GO:0005737;GO:0006355;GO:0003723;GO:0003700;GO:0001227;GO:0001558;GO:0005634;GO:0000981;GO:0060669;GO:0051593;GO:0000122;GO:0006629;GO:0030509;GO:0001701;GO:0001666;GO:0003682;GO:0005813;GO:0043392;GO:0000978;GO:0016604;GO:0001822;GO:…	BP;CC;BP;CC;CC;MF;BP;MF;MF;MF;MF;MF;BP;MF;BP;CC;BP;MF;MF;MF;BP;CC;MF;BP;BP;BP;BP;BP;BP;BP;MF;CC;BP;MF;CC;BP;BP;CC;MF;BP;BP;MF;BP;CC;BP;BP;	regulation of transcription by RNA polymerase II;actin cytoskeleton;defense response to virus;nucleoplasm;nucleolus;transcription corepressor activity;positive regulation of DNA-templated transcription;zinc ion binding;metal ion binding;DNA binding;sequence-specific DNA binding;DNA-binding transcription activator activity, RNA polymerase II-specific;positive regulation of transcription by RNA pol…	K09228	ko05168	Herpes simplex virus 1 infection	zinc finger protein 90 homolog isoform X5 [Delphinapterus leucas]	PF01352.31	KRAB box	Zinc finger protein 90 homolog OS=Homo sapiens OX=9606 GN=ZFP90 PE=1 SV=2	4MF1M	K	zinc finger protein	-	-	-	-	KOG1720	[V]	Defense mechanisms;	Protein tyrosine phosphatase CDC14	-	row-80
transcript:ENST00000568507	transcript:ENST00000568507	1.65792	-11.7081	7.71473e-56	1.46486e-53	down	0	8.9579	0	470	GO:0005654;GO:0005737;GO:0007049;GO:0016604;GO:0005634;GO:0051726;	CC;CC;BP;CC;CC;BP;	nucleoplasm;cytoplasm;cell cycle;nuclear body;nucleus;regulation of cell cycle;	K21626	-	-	cyclin-D1-binding protein 1 [Homo sapiens]	PF13324.10	Grap2 and cyclin-D-interacting, N-terminal	Cyclin-D1-binding protein 1 OS=Homo sapiens OX=9606 GN=CCNDBP1 PE=1 SV=2	4N276	S	regulation of cell cycle	-	-	-	-	-	-	-	-	-	row-81
transcript:ENST00000369635	transcript:ENST00000369635	1.26654	-11.6989	1.30532e-55	2.44865e-53	down	0	4.78804	0	467	GO:0098794;GO:0030425;GO:0035091;GO:0005829;GO:0043231;GO:0005770;GO:0080025;GO:0045202;GO:0015031;GO:0005765;GO:0005764;GO:0097352;GO:0005737;GO:0006914;GO:0030902;GO:0021680;GO:0031902;GO:0099170;	CC;CC;MF;CC;CC;CC;MF;CC;BP;CC;CC;BP;CC;BP;BP;BP;CC;BP;	postsynapse;dendrite;phosphatidylinositol binding;cytosol;intracellular membrane-bounded organelle;late endosome;phosphatidylinositol-3,5-bisphosphate binding;synapse;protein transport;lysosomal membrane;lysosome;autophagosome maturation;cytoplasm;autophagy;hindbrain development;cerebellar Purkinje cell layer development;late endosome membrane;postsynaptic modulation of chemical synaptic transmis…	K17926	-	-	sorting nexin-14-like isoform X1 [Cebus imitator]	PF02194.19	PXA domain	Sorting nexin-14 OS=Homo sapiens OX=9606 GN=SNX14 PE=1 SV=3	4N30S	U	phosphatidylinositol-3,5-bisphosphate binding	-	-	-	-	KOG2101	[ZUD]	Cytoskeleton; Intracellular trafficking, secretion, and vesicular transport; Cell cycle control, cell division, chromosome partitioning;	Intermediate filament-like protein, sorting nexins, and related proteins containing PX (PhoX) domain(s)	-	row-82
transcript:ENST00000325577	transcript:ENST00000325577	1.76507	-11.6802	3.1555e-55	5.84894e-53	down	0	10.5525	0	461	GO:0005634;GO:0006281;GO:0006974;GO:0005654;GO:0043231;GO:0021762;GO:0000077;GO:0003684;GO:0051598;GO:0071479;GO:0008408;GO:0030896;GO:0008311;GO:0005694;	CC;BP;BP;CC;CC;BP;BP;MF;BP;BP;MF;CC;MF;CC;	nucleus;DNA repair;DNA damage response;nucleoplasm;intracellular membrane-bounded organelle;substantia nigra development;DNA damage checkpoint signaling;damaged DNA binding;meiotic recombination checkpoint signaling;cellular response to ionizing radiation;3'-5' exonuclease activity;checkpoint clamp complex;double-stranded DNA 3'-5' DNA exonuclease activity;chromosome;	K02830	ko04218	Cellular senescence	cell cycle checkpoint protein RAD1 isoform X3 [Macaca thibetana thibetana]	PF02144.20	Repair protein Rad1/Rec1/Rad17	Cell cycle checkpoint protein RAD1 OS=Pongo abelii OX=9601 GN=RAD1 PE=2 SV=1	4MW02	L	meiotic recombination checkpoint	-	-	-	-	KOG3194	[DL]	Cell cycle control, cell division, chromosome partitioning; Replication, recombination and repair;	Checkpoint 9-1-1 complex, RAD1 component	-	row-83
transcript:ENST00000488206	transcript:ENST00000488206	1.95353	-8.39439	4.52486e-55	8.28847e-53	down	0.017942	13.7374	1	479	GO:0001889;GO:0035253;GO:0021549;GO:0005654;GO:0005739;GO:0043584;GO:0007368;GO:0035116;GO:0005886;GO:0021772;GO:0001540;GO:0021670;GO:0035869;GO:0001736;GO:0031870;GO:0005737;GO:0004930;GO:0046548;GO:0045744;GO:0005911;GO:0032391;GO:0060039;GO:0008589;GO:0001701;GO:0022038;GO:0005813;GO:0005930;GO:0090102;GO:0007163;GO:0001822;GO:0005509;GO:0005929;GO:0097190;GO:0005923;GO:0005829;GO:0005879;GO:…	BP;CC;BP;CC;CC;BP;BP;BP;CC;BP;MF;BP;CC;BP;MF;CC;MF;BP;BP;CC;CC;BP;BP;BP;BP;CC;CC;BP;BP;BP;MF;CC;BP;CC;CC;CC;BP;BP;BP;CC;	liver development;ciliary rootlet;cerebellum development;nucleoplasm;mitochondrion;nose development;determination of left/right symmetry;embryonic hindlimb morphogenesis;plasma membrane;olfactory bulb development;amyloid-beta binding;lateral ventricle development;ciliary transition zone;establishment of planar polarity;thromboxane A2 receptor binding;cytoplasm;G protein-coupled receptor activity;…	-	-	-	TM2 domain-containing protein 1 isoform X2 [Homo sapiens]	-	-	TM2 domain-containing protein 1 OS=Homo sapiens OX=9606 GN=TM2D1 PE=1 SV=1	4N00M	S	TM2 domain	-	-	-	-	KOG4272	[R]	General function prediction only;	Predicted GTP-binding protein	-	row-84
transcript:ENST00000521724	transcript:ENST00000521724	2.08837	4.36645	9.83113e-55	1.77989e-52	up	10.94	0.514683	870	54	GO:0046664;GO:0016600;GO:0007409;GO:0005925;GO:0015629;GO:0008013;GO:0099092;GO:0030855;GO:0003383;GO:2001045;GO:0030054;GO:0017166;GO:0097192;GO:0007405;GO:0016264;GO:2001240;GO:0098890;GO:0034333;GO:0005198;GO:0090136;GO:0045296;GO:0005886;GO:0048870;GO:1900181;GO:0005915;GO:0016477;GO:0044877;GO:0001541;GO:0005912;GO:0045295;GO:0034332;GO:0043231;GO:0048813;GO:0043627;GO:0016323;GO:0098688;GO:…	BP;CC;BP;CC;CC;MF;CC;BP;BP;BP;CC;MF;BP;BP;BP;BP;CC;BP;MF;BP;MF;CC;BP;BP;CC;BP;MF;BP;CC;MF;BP;CC;BP;BP;CC;CC;CC;CC;BP;CC;BP;BP;MF;CC;BP;CC;BP;CC;BP;BP;BP;BP;BP;CC;CC;MF;BP;BP;BP;BP;BP;BP;MF;CC;BP;CC;CC;BP;CC;BP;BP;BP;BP;CC;MF;BP;BP;BP;BP;BP;BP;CC;BP;	dorsal closure, amnioserosa morphology change;flotillin complex;axonogenesis;focal adhesion;actin cytoskeleton;beta-catenin binding;postsynaptic density, intracellular component;epithelial cell differentiation;apical constriction;negative regulation of integrin-mediated signaling pathway;cell junction;vinculin binding;extrinsic apoptotic signaling pathway in absence of ligand;neuroblast prolifera…	K05691	ko05200;ko04520;ko05213;ko05226;ko04670;ko05100;ko05412;ko04390	Pathways in cancer;Adherens junction;Endometrial cancer;Gastric cancer;Leukocyte transendothelial migration;Bacterial invasion of epithelial cells;Arrhythmogenic right ventricular cardiomyopathy;Hippo signaling pathway	catenin alpha-1-like [Lontra canadensis]	-	-	Catenin alpha-1 OS=Oryctolagus cuniculus OX=9986 GN=CTNNA1 PE=3 SV=1	4J4WW	W	catenin (cadherin-associated protein), alpha 1, 102kDa	-	-	-	-	KOG3681	[W]	Extracellular structures;	Alpha-catenin	-	row-85
transcript:ENST00000472637	transcript:ENST00000472637	1.34711	-11.6486	1.57669e-54	2.82173e-52	down	0	5.472	0	451	GO:0005730;GO:0045747;GO:0005634;GO:0045665;	CC;BP;CC;BP;	nucleolus;positive regulation of Notch signaling pathway;nucleus;negative regulation of neuron differentiation;	K27075	-	-	nucleolus and neural progenitor protein isoform X2 [Homo sapiens]	-	-	Nucleolus and neural progenitor protein OS=Homo sapiens OX=9606 GN=NEPRO PE=1 SV=3	4N3KF	S	Domain of unknown function (DUF4477)	-	-	-	-	-	-	-	-	-	row-86
transcript:ENST00000361660	transcript:ENST00000361660	1.07423	11.5316	1.91589e-54	3.35172e-52	up	3.43357	0	324	0	GO:0006805;GO:0010181;GO:0000103;GO:0019899;GO:0005634;GO:0052722;GO:0046210;GO:0016020;GO:0016491;GO:0071372;GO:0016787;GO:0004783;GO:0070814;GO:0007584;GO:0090181;GO:0102521;GO:0070988;GO:0009725;GO:0005654;GO:0071375;GO:0005739;GO:0003959;GO:0005783;GO:1901362;GO:0048471;GO:0043231;GO:0051539;GO:0050243;GO:0016712;GO:0005737;GO:0071371;GO:0009410;GO:0009055;GO:0045880;GO:0003958;GO:0005789;GO:…	BP;MF;BP;MF;CC;MF;BP;CC;MF;BP;MF;MF;BP;BP;BP;MF;BP;BP;CC;BP;CC;MF;CC;BP;CC;CC;MF;MF;MF;CC;BP;BP;MF;BP;MF;CC;CC;MF;BP;MF;BP;BP;MF;MF;BP;CC;CC;BP;BP;BP;BP;BP;CC;BP;MF;MF;MF;MF;CC;BP;BP;BP;CC;MF;BP;MF;BP;MF;MF;MF;BP;BP;MF;BP;BP;BP;BP;BP;BP;BP;BP;MF;MF;BP;BP;BP;BP;	xenobiotic metabolic process;FMN binding;sulfate assimilation;enzyme binding;nucleus;fatty acid in-chain hydroxylase activity;nitric oxide catabolic process;membrane;oxidoreductase activity;cellular response to follicle-stimulating hormone stimulus;hydrolase activity;sulfite reductase (NADPH) activity;hydrogen sulfide biosynthetic process;response to nutrient;regulation of cholesterol metabolic p…	K15449	-	-	LOW QUALITY PROTEIN: S-adenosyl-L-methionine-dependent tRNA 4-demethylwyosine synthase TYW1B [Gorilla gorilla gorilla]	PF00258.29	Flavodoxin	S-adenosyl-L-methionine-dependent tRNA 4-demethylwyosine synthase TYW1 OS=Homo sapiens OX=9606 GN=TYW1 PE=2 SV=2	4MWSR	C	component of the wybutosine biosynthesis pathway. Wybutosine is a hyper modified guanosine with a tricyclic base found at the 3'-position adjacent to the anticodon of eukaryotic phenylalanine tRNA. Catalyzes the condensation of N- methylguanine with 2 carbon atoms from pyruvate to form the tricyclic 4-demethylwyosine, an intermediate in wybutosine biosynthesis (By similarity)	COG0369	Flavoprotein (flavin reductase) subunit CysJ of sulfite and N-hydroxylaminopurine reductases	FP	-	KOG1160	[C]	Energy production and conversion;	Fe-S oxidoreductase	-	row-87
transcript:ENST00000513914	transcript:ENST00000513914	1.61651	11.5316	1.91589e-54	3.35172e-52	up	8.40232	0	324	0	GO:0005634;GO:0006281;GO:0006974;GO:0005654;GO:0043231;GO:0021762;GO:0000077;GO:0003684;GO:0051598;GO:0071479;GO:0008408;GO:0030896;GO:0008311;GO:0005694;	CC;BP;BP;CC;CC;BP;BP;MF;BP;BP;MF;CC;MF;CC;	nucleus;DNA repair;DNA damage response;nucleoplasm;intracellular membrane-bounded organelle;substantia nigra development;DNA damage checkpoint signaling;damaged DNA binding;meiotic recombination checkpoint signaling;cellular response to ionizing radiation;3'-5' exonuclease activity;checkpoint clamp complex;double-stranded DNA 3'-5' DNA exonuclease activity;chromosome;	K02830	ko04218	Cellular senescence	cell cycle checkpoint protein RAD1 isoform X4 [Hylobates moloch]	PF02144.20	Repair protein Rad1/Rec1/Rad17	Cell cycle checkpoint protein RAD1 OS=Pongo abelii OX=9601 GN=RAD1 PE=2 SV=1	4MW02	L	meiotic recombination checkpoint	-	-	-	-	KOG3194	[DL]	Cell cycle control, cell division, chromosome partitioning; Replication, recombination and repair;	Checkpoint 9-1-1 complex, RAD1 component	-	row-88
transcript:ENST00000472827	transcript:ENST00000472827	1.43992	-11.639	2.26228e-54	3.91375e-52	down	0	6.36071	0	448	GO:0072583;GO:0016020;GO:0072665;GO:0005158;GO:0043231;GO:0140318;GO:0007369;GO:0005774;GO:0061462;GO:0045334;GO:0005765;GO:0032050;GO:0005764;GO:0038016;GO:0005789;GO:0031419;GO:0005886;GO:0035612;GO:0030136;	BP;CC;BP;MF;CC;MF;BP;CC;BP;CC;CC;MF;CC;BP;CC;MF;CC;MF;CC;	clathrin-dependent endocytosis;membrane;protein localization to vacuole;insulin receptor binding;intracellular membrane-bounded organelle;protein transporter activity;gastrulation;vacuolar membrane;protein localization to lysosome;clathrin-coated endocytic vesicle;lysosomal membrane;clathrin heavy chain binding;lysosome;insulin receptor internalization;endoplasmic reticulum membrane;cobalamin bin…	K14617	ko04977	Vitamin digestion and absorption	lysosomal cobalamin transport escort protein LMBD1 [Gorilla gorilla gorilla]	PF04791.20	LMBR1-like membrane protein	Lysosomal cobalamin transport escort protein LMBD1 OS=Homo sapiens OX=9606 GN=LMBRD1 PE=1 SV=1	4N3N6	P	LMBR1-like membrane protein	-	-	-	-	-	-	-	-	-	row-89
transcript:ENST00000534843	transcript:ENST00000534843	2.59705	-4.16778	2.6155e-54	4.47508e-52	down	0.980014	17.4888	68	1571	GO:0005576;GO:0006869;GO:0001525;GO:0030154;GO:0008289;GO:0005886;GO:0045601;GO:0042157;	CC;BP;BP;BP;MF;CC;BP;BP;	extracellular region;lipid transport;angiogenesis;cell differentiation;lipid binding;plasma membrane;regulation of endothelial cell differentiation;lipoprotein metabolic process;	-	-	-	apolipoprotein L domain-containing protein 1 isoform X2 [Pongo abelii]	-	-	Apolipoprotein L domain-containing protein 1 OS=Homo sapiens OX=9606 GN=APOLD1 PE=2 SV=2	4MTGQ	S	Apolipoprotein L	-	-	-	-	-	-	-	-	-	row-90
transcript:ENST00000430270	transcript:ENST00000430270	1.72587	-8.35161	3.6287e-54	6.14117e-52	down	0.017624	9.75208	1	465	-	-	-	-	-	-	probable 18S rRNA (guanine-N(7))-methyltransferase isoform X2 [Homo sapiens]	PF17873.5	Replicase polyprotein 1ab	-	4MVUB	K	Methyltransferase involved in Williams-Beuren syndrome	-	-	-	-	-	-	-	-	-	row-91
transcript:ENST00000582022	transcript:ENST00000582022	1.61315	5.1769	1.06392e-53	1.78121e-51	up	6.91118	0.182962	483	17	GO:0005654;GO:0009615;GO:0052472;GO:0006355;GO:0045111;GO:0005634;	CC;BP;BP;BP;CC;CC;	nucleoplasm;response to virus;modulation by host of symbiont transcription;regulation of DNA-templated transcription;intermediate filament cytoskeleton;nucleus;	K26267	-	-	SAP30-binding protein isoform X2 [Hylobates moloch]	PF07818.17	HCNGP-like protein	SAP30-binding protein OS=Homo sapiens OX=9606 GN=SAP30BP PE=1 SV=1	4N19F	K	HCNGP-like protein	-	-	-	-	KOG2959	[K]	Transcription;	Transcriptional regulator	-	row-92
gene:ENSG00000187608	ISG15	5.4475	3.66519	1.79662e-53	2.97589e-51	up	149.249	11.6739	3105	314	GO:0007141;GO:0000055;GO:0006412;GO:0048812;GO:0022627;GO:0032020;GO:0032733;GO:0022626;GO:0047497;GO:0005840;GO:0009751;GO:0035096;GO:0005634;GO:0031982;GO:0009615;GO:0031398;GO:0006914;GO:0032649;GO:0003735;GO:0042254;GO:0060613;GO:0005654;GO:0005739;GO:0005783;GO:0000902;GO:0045648;GO:0036166;GO:0043005;GO:0030447;GO:0002181;GO:0005737;GO:1990904;GO:0005576;GO:0022625;GO:0005789;GO:0140242;GO:…	BP;BP;BP;BP;CC;BP;BP;CC;BP;CC;BP;BP;CC;CC;BP;BP;BP;BP;MF;BP;BP;CC;CC;CC;BP;BP;BP;CC;BP;BP;CC;CC;CC;CC;CC;BP;CC;BP;CC;BP;BP;BP;BP;CC;BP;BP;BP;BP;CC;CC;BP;BP;CC;BP;CC;BP;BP;BP;CC;BP;CC;BP;MF;CC;BP;BP;BP;BP;CC;MF;BP;BP;MF;BP;BP;BP;BP;BP;CC;BP;BP;BP;BP;CC;BP;BP;BP;BP;BP;MF;MF;BP;BP;BP;CC;CC;CC;CC;BP;BP;CC;MF;MF;BP;CC;	male meiosis I;ribosomal large subunit export from nucleus;translation;neuron projection morphogenesis;cytosolic small ribosomal subunit;ISG15-protein conjugation;positive regulation of interleukin-10 production;cytosolic ribosome;mitochondrion transport along microtubule;ribosome;response to salicylic acid;larval midgut cell programmed cell death;nucleus;vesicle;response to virus;positive regula…	K12159	ko04622;ko05169;ko05165	RIG-I-like receptor signaling pathway;Epstein-Barr virus infection;Human papillomavirus infection	ubiquitin-like protein ISG15 [Homo sapiens]	PF00240.27	Ubiquitin family	Ubiquitin-like protein ISG15 OS=Homo sapiens OX=9606 GN=ISG15 PE=1 SV=5	4MUPX	K	Ubiquitin-like domain	-	-	-	-	KOG0001	[OR]	Posttranslational modification, protein turnover, chaperones; General function prediction only;	Ubiquitin and ubiquitin-like proteins	-	row-93
transcript:ENST00000476581	transcript:ENST00000476581	1.1382	-11.5765	5.13715e-53	8.41953e-51	down	0	3.84468	0	429	GO:0006281;GO:0005654;GO:0005739;GO:0005730;GO:0045893;GO:0005886;GO:0044877;GO:0000720;GO:0010224;GO:0006974;GO:0043231;GO:0000405;GO:0003697;GO:0005737;GO:0031573;GO:0070914;GO:0061629;GO:0000404;GO:0005634;GO:0009410;GO:0006298;GO:0140612;GO:0006289;GO:0003684;GO:0000785;GO:0045721;GO:1901990;GO:0005829;GO:0003713;GO:0071942;GO:0000109;GO:0000111;GO:0010996;GO:0090734;	BP;CC;CC;CC;BP;CC;MF;BP;BP;BP;CC;MF;MF;CC;BP;BP;MF;MF;CC;BP;BP;MF;BP;MF;CC;BP;BP;CC;MF;CC;CC;CC;BP;CC;	DNA repair;nucleoplasm;mitochondrion;nucleolus;positive regulation of DNA-templated transcription;plasma membrane;protein-containing complex binding;pyrimidine dimer repair by nucleotide-excision repair;response to UV-B;DNA damage response;intracellular membrane-bounded organelle;bubble DNA binding;single-stranded DNA binding;cytoplasm;mitotic intra-S DNA damage checkpoint signaling;UV-damage exc…	K10838	ko03420;ko00403	Nucleotide excision repair;Indole diterpene alkaloid biosynthesis	DNA repair protein complementing XP-C cells isoform X2 [Homo sapiens]	PF15392.10	Joubert syndrome-associated	DNA repair protein complementing XP-C cells OS=Homo sapiens OX=9606 GN=XPC PE=1 SV=4	4MV21	L	XPC complex subunit, DNA damage recognition and repair factor	-	-	-	-	KOG2179	[L]	Replication, recombination and repair;	Nucleotide excision repair complex XPC-HR23B, subunit XPC/DPB11	-	row-94
MSTRG.18497.3	MSTRG.18497.3	0.396532	-11.5596	1.31158e-52	2.10529e-50	down	0	0.732751	0	424	-	-	-	-	-	-	LOW QUALITY PROTEIN: putative uncharacterized protein FLJ44672 [Pan troglodytes]	PF15788.9	Domain of unknown function (DUF4705)	Putative uncharacterized protein FLJ92257 OS=Homo sapiens OX=9606 PE=5 SV=1	4N7Z9	S	Domain of unknown function (DUF4705)	-	-	-	-	-	-	-	-	-	row-95
transcript:ENST00000547787	transcript:ENST00000547787	1.32211	-11.5596	1.31158e-52	2.10529e-50	down	0	5.2516	0	424	GO:0048681;GO:0050291;GO:0003677;GO:0005783;GO:1900143;GO:0030148;GO:0006954;GO:0014003;GO:0008544;GO:1900148;GO:0016020;GO:0035902;GO:0016410;GO:0005789;GO:0030216;GO:1905045;GO:0070268;GO:0046513;GO:0010626;GO:0019216;	BP;MF;MF;CC;BP;BP;BP;BP;BP;BP;CC;BP;MF;CC;BP;BP;BP;BP;BP;BP;	negative regulation of axon regeneration;sphingosine N-acyltransferase activity;DNA binding;endoplasmic reticulum;positive regulation of oligodendrocyte apoptotic process;sphingolipid biosynthetic process;inflammatory response;oligodendrocyte development;epidermis development;negative regulation of Schwann cell migration;membrane;response to immobilization stress;N-acyltransferase activity;endopl…	K23727	ko00600;ko01100;ko04071	Sphingolipid metabolism;Metabolic pathways;Sphingolipid signaling pathway	PREDICTED: uncharacterized protein LOC108536981 [Rhinopithecus bieti]	-	-	Ceramide synthase 5 OS=Homo sapiens OX=9606 GN=CERS5 PE=1 SV=1	4MXPT	U	TRAM, LAG1 and CLN8 homology domains.	-	-	-	-	KOG1607	[U]	Intracellular trafficking, secretion, and vesicular transport;	Protein transporter of the TRAM (translocating chain-associating membrane) superfamily	-	row-96
transcript:ENST00000475656	transcript:ENST00000475656	1.13899	11.4397	1.6062e-52	2.55189e-50	up	3.85	0	304	0	GO:0008608;GO:0005654;GO:0002931;GO:0000922;GO:0000278;GO:0007059;GO:0007095;GO:0008017;GO:0005737;GO:0006325;GO:0005634;GO:0070536;GO:0090307;GO:0045739;GO:0070531;GO:0016604;GO:0010212;GO:0071497;GO:0031593;GO:0006282;GO:0005829;GO:0043066;GO:0070552;GO:0006302;GO:0005874;GO:0051301;GO:0044818;	BP;CC;BP;CC;BP;BP;BP;MF;CC;BP;CC;BP;BP;BP;CC;CC;BP;BP;MF;BP;CC;BP;CC;BP;CC;BP;BP;	attachment of spindle microtubules to kinetochore;nucleoplasm;response to ischemia;spindle pole;mitotic cell cycle;chromosome segregation;mitotic G2 DNA damage checkpoint signaling;microtubule binding;cytoplasm;chromatin organization;nucleus;protein K63-linked deubiquitination;mitotic spindle assembly;positive regulation of DNA repair;BRCA1-A complex;nuclear body;response to ionizing radiation;ce…	K20774	ko03440	Homologous recombination	BRCA1-A complex subunit Abraxas 1 [Orycteropus afer afer]	PF21125.1	BRCA1-A complex subunit Abraxas 1 MPN domain	BRCA1-A complex subunit Abraxas 1 OS=Homo sapiens OX=9606 GN=ABRAXAS1 PE=1 SV=2	4MX5S	K	Family with sequence similarity 175 member A	-	-	-	-	-	-	-	-	-	row-97
transcript:ENST00000504325	transcript:ENST00000504325	6.40558	3.48913	1.82615e-52	2.87203e-50	up	280.382	24.5414	8925	1020	GO:0140582;GO:0048814;GO:0010228;GO:0006508;GO:0001764;GO:0051304;GO:0048364;GO:0048367;GO:1903076;GO:0030587;GO:0006412;GO:0033209;GO:0000922;GO:0003714;GO:0005828;GO:0000235;GO:0022627;GO:0022626;GO:0012501;GO:0045296;GO:0005840;GO:0032465;GO:0035556;GO:2000765;GO:0031047;GO:0019899;GO:0032436;GO:0048571;GO:0030381;GO:0035591;GO:1902660;GO:0030286;GO:0019903;GO:0043935;GO:0006325;GO:0061629;GO:…	BP;BP;BP;BP;BP;BP;BP;BP;BP;BP;BP;BP;CC;MF;CC;CC;CC;CC;BP;MF;CC;BP;BP;BP;BP;MF;BP;BP;BP;MF;BP;CC;MF;BP;BP;MF;MF;CC;BP;BP;CC;BP;BP;CC;BP;BP;MF;CC;BP;BP;BP;BP;BP;BP;MF;BP;BP;BP;MF;BP;BP;MF;BP;BP;MF;CC;BP;MF;BP;CC;BP;BP;CC;BP;BP;CC;BP;BP;MF;BP;MF;BP;BP;CC;CC;BP;BP;BP;CC;BP;CC;MF;CC;BP;CC;BP;BP;BP;BP;BP;BP;CC;CC;BP;CC;BP;MF;MF;CC;CC;BP;BP;BP;CC;BP;CC;BP;CC;BP;MF;MF;BP;BP;MF;BP;BP;CC;CC;BP;BP;BP;BP;MF;…	adenylate cyclase-activating G protein-coupled cAMP receptor signaling pathway;regulation of dendrite morphogenesis;vegetative to reproductive phase transition of meristem;proteolysis;neuron migration;chromosome separation;root development;shoot system development;regulation of protein localization to plasma membrane;sorocarp development;translation;tumor necrosis factor-mediated signaling pathwa…	K14753	ko05162	Measles	PREDICTED: guanine nucleotide-binding protein subunit beta-2-like 1 isoform X7 [Colobus angolensis palliatus]	PF00400.36	WD domain, G-beta repeat	Small ribosomal subunit protein RACK1 OS=Rattus norvegicus OX=10116 GN=Rack1 PE=1 SV=3	4PUES	T	rescue of stalled ribosome	COG2319	WD40 repeat	R	General function prediction only	KOG0279	[T]	Signal transduction mechanisms;	G protein beta subunit-like protein	-	row-98
transcript:ENST00000567530	transcript:ENST00000567530	1.38026	11.4254	3.67186e-52	5.71708e-50	up	5.77644	0	301	0	GO:0005947;GO:0005739;GO:0046872;GO:0004672;GO:0009063;GO:0006552;GO:0010906;GO:0009083;GO:0016301;GO:0005759;GO:0004740;GO:0006550;GO:0004674;GO:0106310;GO:0016310;GO:0005524;GO:0047323;GO:0045763;GO:0006574;GO:0005967;GO:0004722;GO:0007283;GO:0008610;	CC;CC;MF;MF;BP;BP;BP;BP;MF;CC;MF;BP;MF;MF;BP;MF;MF;BP;BP;CC;MF;BP;BP;	obsolete mitochondrial alpha-ketoglutarate dehydrogenase complex;mitochondrion;metal ion binding;protein kinase activity;amino acid catabolic process;L-leucine catabolic process;regulation of glucose metabolic process;branched-chain amino acid catabolic process;kinase activity;mitochondrial matrix;pyruvate dehydrogenase (acetyl-transferring) kinase activity;isoleucine catabolic process;protein se…	K00905	-	-	branched-chain alpha-ketoacid dehydrogenase kinase isoform c [Homo sapiens]	PF10436.13	Mitochondrial branched-chain alpha-ketoacid dehydrogenase kinase	Branched-chain alpha-ketoacid dehydrogenase kinase OS=Homo sapiens OX=9606 GN=BCKDK PE=1 SV=2	4N4ZH	T	Mitochondrial branched-chain alpha-ketoacid dehydrogenase kinase	-	-	-	-	KOG0787	[T]	Signal transduction mechanisms;	Dehydrogenase kinase	-	row-99
transcript:ENST00000602307	transcript:ENST00000602307	1.69757	-4.15975	9.53169e-52	1.46939e-49	down	0.375765	6.64705	56	1287	GO:0070062;GO:0043328;GO:0005654;GO:1903387;GO:0043162;GO:0061357;GO:0043231;GO:0060271;GO:0010633;GO:0005737;GO:0045022;GO:0005634;GO:0004725;GO:2000643;GO:0016604;GO:0005769;GO:0005768;GO:0005829;GO:1903393;GO:0032456;GO:0016311;GO:0019901;GO:0036064;	CC;BP;CC;BP;BP;BP;CC;BP;BP;CC;BP;CC;MF;BP;CC;CC;CC;CC;BP;BP;BP;MF;CC;	extracellular exosome;protein transport to vacuole involved in ubiquitin-dependent protein catabolic process via the multivesicular body sorting pathway;nucleoplasm;positive regulation of homophilic cell adhesion;ubiquitin-dependent protein catabolic process via the multivesicular body sorting pathway;positive regulation of Wnt protein secretion;intracellular membrane-bounded organelle;cilium ass…	K18040	-	-	tyrosine-protein phosphatase non-receptor type 23 isoform X1 [Elephas maximus indicus]	PF03097.22	BRO1-like domain	Tyrosine-protein phosphatase non-receptor type 23 OS=Homo sapiens OX=9606 GN=PTPN23 PE=1 SV=1	4MDN6	T	Protein tyrosine phosphatase, non-receptor type 23	-	-	-	-	KOG2220	[R]	General function prediction only;	Predicted signal transduction protein	-	row-100
transcript:ENST00000556825	transcript:ENST00000556825	2.50288	-4.08485	5.02033e-51	7.66339e-49	down	0.932646	15.624	60	1309	GO:0070062;GO:0016597;GO:0009113;GO:0005743;GO:0006730;GO:0006545;GO:0005739;GO:0008270;GO:0035999;GO:0005886;GO:0048027;GO:0006565;GO:0005759;GO:0046655;GO:0002082;GO:0006564;GO:0009506;GO:0007623;GO:0030170;GO:0015630;GO:0005737;GO:0008732;GO:1901149;GO:0005634;GO:0070536;GO:0006544;GO:0051289;GO:0010197;GO:0046653;GO:0042802;GO:0003682;GO:0009555;GO:0042803;GO:0000900;GO:0034340;GO:0070905;GO:…	CC;MF;BP;CC;BP;BP;CC;MF;BP;CC;MF;BP;CC;BP;BP;BP;CC;BP;MF;CC;CC;MF;MF;CC;BP;BP;BP;BP;BP;MF;MF;BP;MF;MF;BP;MF;BP;CC;CC;CC;MF;BP;BP;BP;BP;BP;	extracellular exosome;amino acid binding;purine nucleobase biosynthetic process;mitochondrial inner membrane;one-carbon metabolic process;glycine biosynthetic process;mitochondrion;zinc ion binding;tetrahydrofolate interconversion;plasma membrane;mRNA 5'-UTR binding;L-serine catabolic process;mitochondrial matrix;folic acid metabolic process;regulation of oxidative phosphorylation;L-serine biosyn…	K00600	ko00260;ko01200;ko00670;ko00630;ko01230;ko01100;ko01523	Glycine, serine and threonine metabolism;Carbon metabolism;One carbon pool by folate;Glyoxylate and dicarboxylate metabolism;Biosynthesis of amino acids;Metabolic pathways;Antifolate resistance	serine hydroxymethyltransferase, mitochondrial isoform 1 precursor [Homo sapiens]	PF00464.23	Serine hydroxymethyltransferase	Serine hydroxymethyltransferase, mitochondrial OS=Homo sapiens OX=9606 GN=SHMT2 PE=1 SV=3	4N1SP	H	Serine hydroxymethyltransferase	-	-	-	-	KOG2467	[E]	Amino acid transport and metabolism;	Glycine/serine hydroxymethyltransferase	-	row-101
transcript:ENST00000429888	transcript:ENST00000429888	0.614349	11.3516	1.33399e-50	2.01652e-48	up	1.34356	0	286	0	GO:2000276;GO:0005788;GO:0002931;GO:0048364;GO:0030587;GO:0090201;GO:0034389;GO:0071277;GO:0019899;GO:0006457;GO:0006974;GO:0019538;GO:0060352;GO:0051169;GO:1904399;GO:0061083;GO:0005634;GO:0005771;GO:0031982;GO:0019076;GO:0016020;GO:0000122;GO:0008134;GO:0045836;GO:0043065;GO:0005768;GO:1902176;GO:0051879;GO:0005757;GO:0065003;GO:0005758;GO:0008637;GO:0043410;GO:0051082;GO:0042026;GO:0070266;GO:…	BP;CC;BP;BP;BP;BP;BP;BP;MF;BP;BP;BP;BP;BP;MF;BP;CC;CC;CC;BP;CC;BP;MF;BP;BP;CC;BP;MF;CC;BP;CC;BP;BP;MF;BP;BP;MF;CC;BP;CC;CC;BP;BP;CC;BP;BP;BP;BP;CC;CC;CC;CC;CC;BP;CC;BP;BP;CC;CC;BP;BP;BP;CC;BP;CC;BP;BP;BP;BP;BP;BP;CC;BP;BP;BP;CC;BP;CC;CC;MF;MF;MF;CC;BP;BP;CC;CC;CC;BP;MF;BP;CC;MF;CC;MF;CC;BP;BP;BP;BP;CC;BP;BP;BP;BP;MF;BP;CC;MF;BP;BP;MF;BP;BP;MF;BP;CC;BP;CC;BP;BP;CC;CC;CC;BP;CC;BP;CC;BP;BP;BP;BP;MF;…	negative regulation of oxidative phosphorylation uncoupler activity;endoplasmic reticulum lumen;response to ischemia;root development;sorocarp development;negative regulation of release of cytochrome c from mitochondria;lipid droplet organization;cellular response to calcium ion;enzyme binding;protein folding;DNA damage response;protein metabolic process;cell adhesion molecule production;nuclear …	K12740	-	-	NK-tumor recognition protein isoform X10 [Mus musculus]	PF00160.25	Cyclophilin type peptidyl-prolyl cis-trans isomerase/CLD	NK-tumor recognition protein OS=Homo sapiens OX=9606 GN=NKTR PE=1 SV=2	4J4GQ	O	Natural killer cell triggering receptor	COG0652	Peptidyl-prolyl cis-trans isomerase (rotamase) - cyclophilin family	O	Posttranslational modification, protein turnover, chaperones	KOG0546	[O]	Posttranslational modification, protein turnover, chaperones;	HSP90 co-chaperone CPR7/Cyclophilin	-	row-102
transcript:ENST00000525283	transcript:ENST00000525283	1.78667	11.3415	2.05337e-50	3.07413e-48	up	10.9038	0	284	0	GO:0045338;GO:0016020;GO:0051996;GO:0004310;GO:0006695;GO:0008299;GO:0046872;GO:0006694;GO:0005783;GO:0005789;	BP;CC;MF;MF;BP;BP;MF;BP;CC;CC;	farnesyl diphosphate metabolic process;membrane;squalene synthase [NAD(P)H] activity;obsolete farnesyl-diphosphate farnesyltransferase activity;cholesterol biosynthetic process;isoprenoid biosynthetic process;metal ion binding;steroid biosynthetic process;endoplasmic reticulum;endoplasmic reticulum membrane;	K00801	ko01100;ko00100	Metabolic pathways;Steroid biosynthesis	squalene synthase isoform X3 [Theropithecus gelada]	-	-	Squalene synthase OS=Pongo abelii OX=9601 GN=FDFT1 PE=2 SV=1	4M803	I	farnesyl-diphosphate farnesyltransferase 1	-	-	-	-	KOG1459	[I]	Lipid transport and metabolism;	Squalene synthetase	-	row-103
transcript:ENST00000545307	transcript:ENST00000545307	2.99759	3.85225	8.02275e-50	1.18966e-47	up	23.529	1.60046	1093	97	GO:0001778;GO:0030479;GO:0060048;GO:0033275;GO:0030016;GO:0090131;GO:0032432;GO:0016192;GO:0031011;GO:0005634;GO:0000142;GO:0009991;GO:0044129;GO:0016020;GO:0030017;GO:0010628;GO:0016787;GO:0070252;GO:0019904;GO:0045335;GO:0017022;GO:0044782;GO:0030240;GO:0007015;GO:0031013;GO:0014866;GO:0005856;GO:0050807;GO:0030010;GO:0043503;GO:0048545;GO:0031032;GO:0005938;GO:0000902;GO:0000812;GO:0042331;GO:…	BP;CC;BP;BP;CC;BP;CC;BP;CC;CC;CC;BP;BP;CC;CC;BP;MF;BP;MF;CC;MF;BP;BP;BP;MF;BP;CC;BP;BP;BP;BP;BP;CC;BP;CC;BP;CC;CC;CC;CC;CC;BP;CC;BP;MF;BP;MF;CC;CC;BP;BP;BP;CC;BP;CC;BP;BP;CC;CC;BP;CC;MF;CC;BP;CC;CC;CC;BP;MF;BP;MF;BP;CC;BP;CC;BP;BP;CC;CC;CC;BP;MF;CC;MF;CC;BP;CC;MF;CC;CC;BP;BP;MF;CC;BP;CC;CC;CC;CC;BP;MF;BP;CC;BP;CC;CC;CC;CC;BP;BP;BP;BP;BP;BP;MF;CC;CC;CC;BP;CC;BP;CC;CC;BP;BP;BP;MF;BP;MF;CC;CC;BP;BP;…	plasma membrane repair;actin cortical patch;cardiac muscle contraction;actin-myosin filament sliding;myofibril;mesenchyme migration;actin filament bundle;vesicle-mediated transport;Ino80 complex;nucleus;cellular bud neck contractile ring;obsolete response to extracellular stimulus;positive regulation of development of symbiont in host;membrane;sarcomere;positive regulation of gene expression;hydr…	K16576	-	-	actin-related protein 10 isoform X2 [Marmota marmota marmota]	PF00022.23	Actin	Actin-related protein 10 OS=Homo sapiens OX=9606 GN=ACTR10 PE=1 SV=1	4MHVX	Z	Actin	-	-	-	-	KOG0676	[Z]	Cytoskeleton;	Actin and related proteins	-	row-104
transcript:ENST00000572105	transcript:ENST00000572105	7.57714	-3.32028	1.74172e-49	2.55836e-47	down	60.3694	593.215	2044	26205	GO:0006357;GO:0007409;GO:0030016;GO:1903076;GO:0120192;GO:0045121;GO:0045663;GO:0000786;GO:0005912;GO:0150111;GO:0140288;GO:0045596;GO:0031011;GO:0005634;GO:0031982;GO:0009792;GO:2000045;GO:0005522;GO:0016020;GO:0030424;GO:0030036;GO:0010628;GO:0090303;GO:0000079;GO:1900242;GO:1902396;GO:0030335;GO:0120220;GO:0016787;GO:0051592;GO:0045335;GO:0071257;GO:0005856;GO:0098685;GO:0005654;GO:0045893;GO:…	BP;BP;CC;BP;BP;CC;BP;CC;CC;BP;CC;BP;CC;CC;CC;BP;BP;MF;CC;CC;BP;BP;BP;BP;BP;BP;BP;CC;MF;BP;CC;BP;CC;CC;CC;BP;BP;BP;CC;BP;CC;CC;CC;BP;CC;BP;CC;CC;BP;BP;MF;BP;BP;CC;BP;CC;BP;CC;MF;BP;CC;CC;BP;MF;BP;BP;CC;CC;BP;CC;CC;CC;BP;BP;BP;BP;BP;CC;CC;CC;CC;CC;CC;MF;CC;BP;BP;MF;BP;CC;MF;CC;CC;CC;BP;BP;CC;CC;CC;BP;CC;CC;BP;BP;BP;MF;CC;BP;BP;CC;BP;BP;MF;BP;BP;CC;CC;BP;CC;CC;CC;CC;BP;BP;BP;BP;CC;BP;BP;MF;MF;BP;	regulation of transcription by RNA polymerase II;axonogenesis;myofibril;regulation of protein localization to plasma membrane;tight junction assembly;membrane raft;positive regulation of myoblast differentiation;nucleosome;adherens junction;regulation of transepithelial transport;GBAF complex;negative regulation of cell differentiation;Ino80 complex;nucleus;vesicle;embryo development ending in bi…	K05692	ko05164;ko05132;ko04210;ko04919;ko04714;ko05131;ko04611;ko05135;ko05130;ko05414;ko00604;ko04015;ko05418;ko05100;ko04921;ko05110;ko04145;ko04530;ko04520;ko05205;ko04810;ko04390;ko04670;ko04510;ko05412;ko05416;ko05410;ko05225	Influenza A;Salmonella infection;Apoptosis;Thyroid hormone signaling pathway;Thermogenesis;Shigellosis;Platelet activation;Yersinia infection;Pathogenic Escherichia coli infection;Dilated cardiomyopathy;Glycosphingolipid biosynthesis - ganglio series;Rap1 signaling pathway;Fluid shear stress and atherosclerosis;Bacterial invasion of epithelial cells;Oxytocin signaling pathway;Vibrio cholerae infe…	LOW QUALITY PROTEIN: actin-1-like [Macaca mulatta]	PF00022.23	Actin	Actin-1 (Fragment) OS=Absidia glauca OX=4829 GN=ACT1 PE=3 SV=1	45RC5	Z	Actin	COG5277	Actin-related protein	Z	Cytoskeleton	KOG0676	[Z]	Cytoskeleton;	Actin and related proteins	-	row-105
transcript:ENST00000469169	transcript:ENST00000469169	1.581	5.51426	7.76691e-49	1.13019e-46	up	6.85357	0.139697	361	10	GO:0005730;GO:0045747;GO:0005634;GO:0045665;	CC;BP;CC;BP;	nucleolus;positive regulation of Notch signaling pathway;nucleus;negative regulation of neuron differentiation;	K27075	-	-	nucleolus and neural progenitor protein isoform X2 [Homo sapiens]	-	-	Nucleolus and neural progenitor protein OS=Homo sapiens OX=9606 GN=NEPRO PE=1 SV=3	4N3KF	S	Domain of unknown function (DUF4477)	-	-	-	-	-	-	-	-	-	row-106
transcript:ENST00000378601	transcript:ENST00000378601	1.38589	11.2633	8.6751e-49	1.25066e-46	up	5.82949	0	269	0	GO:0006281;GO:0005654;GO:0030054;GO:0003677;GO:0004842;GO:0044877;GO:0006974;GO:0000209;GO:0070914;GO:0005634;GO:0006290;GO:0031464;GO:0009411;GO:0051865;GO:0080008;GO:0006289;GO:0031465;GO:0032991;GO:0003684;GO:0000785;GO:0034644;GO:0016567;GO:0090734;	BP;CC;CC;MF;MF;MF;BP;BP;BP;CC;BP;CC;BP;BP;CC;BP;CC;CC;MF;CC;BP;BP;CC;	DNA repair;nucleoplasm;cell junction;DNA binding;ubiquitin-protein transferase activity;protein-containing complex binding;DNA damage response;protein polyubiquitination;UV-damage excision repair;nucleus;pyrimidine dimer repair;Cul4A-RING E3 ubiquitin ligase complex;response to UV;protein autoubiquitination;Cul4-RING E3 ubiquitin ligase complex;nucleotide-excision repair;Cul4B-RING E3 ubiquitin l…	K10140	ko05220;ko04115;ko05225;ko05226;ko00403;ko05224;ko05222;ko05223;ko05217;ko05214;ko05200;ko05218;ko05161;ko05212;ko05213;ko05169;ko03420;ko05210;ko04120;ko05202;ko05216	Chronic myeloid leukemia;p53 signaling pathway;Hepatocellular carcinoma;Gastric cancer;Indole diterpene alkaloid biosynthesis;Breast cancer;Small cell lung cancer;Non-small cell lung cancer;Basal cell carcinoma;Glioma;Pathways in cancer;Melanoma;Hepatitis B;Pancreatic cancer;Endometrial cancer;Epstein-Barr virus infection;Nucleotide excision repair;Colorectal cancer;Ubiquitin mediated proteolysis…	DNA damage-binding protein 2 isoform X1 [Homo sapiens]	PF00400.36	WD domain, G-beta repeat	DNA damage-binding protein 2 OS=Homo sapiens OX=9606 GN=DDB2 PE=1 SV=1	4N0AA	S	WD domain, G-beta repeat	-	-	-	-	KOG4328	[S]	Function unknown;	WD40 protein	-	row-107
transcript:ENST00000538239	transcript:ENST00000538239	0.563133	11.2579	1.08603e-48	1.55132e-46	up	1.18293	0	268	0	GO:0044295;GO:1902997;GO:0008083;GO:0072659;GO:0044853;GO:0035116;GO:0040008;GO:0070447;GO:0033762;GO:0038024;GO:0140077;GO:0061098;GO:0005771;GO:0048514;GO:0030301;GO:0016020;GO:0061354;GO:0030424;GO:0010800;GO:0032374;GO:0090179;GO:0003279;GO:1905278;GO:0019221;GO:0043065;GO:0005768;GO:0003050;GO:0030414;GO:0001618;GO:0010467;GO:0090181;GO:0048856;GO:0034361;GO:0007399;GO:0071347;GO:0060444;GO:…	CC;BP;MF;BP;CC;BP;BP;BP;BP;MF;BP;BP;CC;BP;BP;CC;BP;CC;BP;BP;BP;BP;BP;BP;BP;CC;BP;MF;MF;BP;BP;BP;CC;BP;BP;BP;CC;BP;BP;BP;BP;MF;BP;CC;BP;MF;BP;MF;BP;BP;BP;BP;BP;BP;BP;BP;BP;BP;BP;BP;BP;BP;BP;BP;BP;BP;BP;BP;MF;BP;BP;BP;BP;BP;BP;CC;BP;BP;MF;BP;CC;MF;CC;BP;BP;BP;CC;BP;CC;BP;BP;BP;BP;BP;CC;BP;BP;BP;BP;BP;BP;BP;MF;MF;BP;BP;BP;MF;CC;CC;BP;BP;BP;BP;BP;BP;BP;BP;BP;BP;BP;MF;BP;BP;MF;BP;BP;MF;CC;MF;BP;MF;BP;…	axonal growth cone;negative regulation of neurofibrillary tangle assembly;growth factor activity;protein localization to plasma membrane;plasma membrane raft;embryonic hindlimb morphogenesis;regulation of growth;positive regulation of oligodendrocyte progenitor proliferation;response to glucagon;cargo receptor activity;positive regulation of lipoprotein transport;positive regulation of protein ty…	K03068	ko05225;ko04150;ko05226;ko04928;ko05224;ko04310;ko05200;ko00625	Hepatocellular carcinoma;mTOR signaling pathway;Gastric cancer;Parathyroid hormone synthesis, secretion and action;Breast cancer;Wnt signaling pathway;Pathways in cancer;Chloroalkane and chloroalkene degradation	low-density lipoprotein receptor-related protein 6 isoform b precursor [Homo sapiens]	PF00058.21	Low-density lipoprotein receptor repeat class B	Low-density lipoprotein receptor-related protein 6 OS=Homo sapiens OX=9606 GN=LRP6 PE=1 SV=2	4N0DH	T	Coagulation Factor Xa inhibitory site	COG3391	DNA-binding beta-propeller fold protein YncE	R	General function prediction only	KOG1215	[T]	Signal transduction mechanisms;	Low-density lipoprotein receptors containing Ca2+-binding EGF-like domains	-	row-108
transcript:ENST00000475972	transcript:ENST00000475972	1.51521	5.71042	2.60557e-48	3.68807e-46	up	6.39672	0.104612	332	8	GO:0043029;GO:0002437;GO:0048873;GO:0042015;GO:0042098;GO:0042130;GO:0001808;GO:0004896;GO:0032753;GO:0032689;GO:0032733;GO:0032703;GO:0019221;GO:0005886;GO:0002765;	BP;BP;BP;MF;BP;BP;BP;MF;BP;BP;BP;BP;BP;CC;BP;	T cell homeostasis;inflammatory response to antigenic stimulus;homeostasis of number of cells within a tissue;interleukin-20 binding;T cell proliferation;negative regulation of T cell proliferation;negative regulation of type IV hypersensitivity;cytokine receptor activity;positive regulation of interleukin-4 production;negative regulation of type II interferon production;positive regulation of in…	K05137	ko04060;ko04630;ko04061	Cytokine-cytokine receptor interaction;JAK-STAT signaling pathway;Viral protein interaction with cytokine and cytokine receptor	interleukin-20 receptor subunit beta isoform X1 [Homo sapiens]	PF01108.21	Tissue factor	Interleukin-20 receptor subunit beta OS=Homo sapiens OX=9606 GN=IL20RB PE=1 SV=1	4MSN0	T	Interferon-alpha/beta receptor, fibronectin type III	-	-	-	-	-	-	-	-	-	row-109
transcript:ENST00000453505	transcript:ENST00000453505	1.52648	5.2665	4.20105e-48	5.89282e-46	up	6.17692	0.15636	364	12	GO:0008611;GO:0005783;GO:0005789;GO:0050207;GO:0006631;	BP;CC;CC;MF;BP;	ether lipid biosynthetic process;endoplasmic reticulum;endoplasmic reticulum membrane;plasmanylethanolamine desaturase activity;fatty acid metabolic process;	K20656	-	-	plasmanylethanolamine desaturase 1 isoform 2 [Homo sapiens]	-	-	Plasmanylethanolamine desaturase 1 OS=Homo sapiens OX=9606 GN=PEDS1 PE=1 SV=3	4N20Y	O	protein modification by small protein conjugation	-	-	-	-	-	-	-	-	-	row-110
transcript:ENST00000376185	transcript:ENST00000376185	1.21974	11.2252	5.30928e-48	7.31553e-46	up	4.42445	0	262	0	GO:1904949;GO:0070062;GO:0016241;GO:0098793;GO:0045851;GO:0005794;GO:0012501;GO:0006754;GO:0043068;GO:0042470;GO:0005886;GO:0030665;GO:1902495;GO:0030672;GO:0033181;GO:0035002;GO:0005773;GO:0036295;GO:0006879;GO:0000221;GO:0098850;GO:0007430;GO:0016020;GO:0000329;GO:0015078;GO:0016324;GO:0033176;GO:0000325;GO:0051117;GO:0033180;GO:0005829;GO:0007035;GO:0048388;GO:0016887;GO:0000139;GO:1902600;GO:…	CC;CC;BP;CC;BP;CC;BP;BP;BP;CC;CC;CC;CC;CC;CC;BP;CC;BP;BP;CC;CC;BP;CC;CC;MF;CC;CC;CC;MF;CC;CC;BP;BP;MF;CC;BP;CC;CC;MF;BP;BP;	ATPase complex;extracellular exosome;regulation of macroautophagy;presynapse;pH reduction;Golgi apparatus;programmed cell death;ATP biosynthetic process;positive regulation of programmed cell death;melanosome;plasma membrane;clathrin-coated vesicle membrane;transmembrane transporter complex;synaptic vesicle membrane;plasma membrane proton-transporting V-type ATPase complex;liquid clearance, open …	K02152	ko04721;ko05165;ko04150;ko00190;ko01100;ko05110;ko04145;ko05323;ko04966;ko05120	Synaptic vesicle cycle;Human papillomavirus infection;mTOR signaling pathway;Oxidative phosphorylation;Metabolic pathways;Vibrio cholerae infection;Phagosome;Rheumatoid arthritis;Collecting duct acid secretion;Epithelial cell signaling in Helicobacter pylori infection	V-type proton ATPase subunit G 2 isoform X1 [Pan paniscus]	PF03179.19	Vacuolar (H+)-ATPase G subunit	V-type proton ATPase subunit G 2 OS=Homo sapiens OX=9606 GN=ATP6V1G2 PE=1 SV=1	4N6YD	C	ATPase activity, coupled to transmembrane movement of substances	-	-	-	-	KOG1772	[C]	Energy production and conversion;	Vacuolar H+-ATPase V1 sector, subunit G	-	row-111
transcript:ENST00000490447	transcript:ENST00000490447	1.48506	11.2252	5.30928e-48	7.31553e-46	up	6.83602	0	262	0	GO:0030133;GO:0043231;GO:0005794;GO:0030154;GO:0005886;	CC;CC;CC;BP;CC;	transport vesicle;intracellular membrane-bounded organelle;Golgi apparatus;cell differentiation;plasma membrane;	K22941	-	-	protein YIPF3 isoform X5 [Myotis lucifugus]	-	-	Protein YIPF3 OS=Rattus norvegicus OX=10116 GN=Yipf3 PE=2 SV=1	4KR8S	S	Yip1 domain family member 3	-	-	-	-	KOG3114	[S]	Function unknown;	Uncharacterized conserved protein	-	row-112
transcript:ENST00000425406	transcript:ENST00000425406	1.98218	-3.87002	1.57501e-47	2.15114e-45	down	0.603785	8.73295	68	1278	GO:0006357;GO:0001228;GO:0005829;GO:0005654;GO:0045944;GO:0006355;GO:0000978;GO:0007049;GO:0003700;GO:0005634;GO:0000981;	BP;MF;CC;CC;BP;BP;MF;BP;MF;CC;MF;	regulation of transcription by RNA polymerase II;DNA-binding transcription activator activity, RNA polymerase II-specific;cytosol;nucleoplasm;positive regulation of transcription by RNA polymerase II;regulation of DNA-templated transcription;RNA polymerase II cis-regulatory region sequence-specific DNA binding;cell cycle;DNA-binding transcription factor activity;nucleus;DNA-binding transcription …	K21625	-	-	cyclin-D-binding Myb-like transcription factor 1 isoform X5 [Homo sapiens]	PF20588.2	Cyclin-D-binding Myb-like transcription factor 1 N-terminal	Cyclin-D-binding Myb-like transcription factor 1 OS=Homo sapiens OX=9606 GN=DMTF1 PE=1 SV=1	4KPRD	K	myb-like transcription factor	-	-	-	-	KOG0051	[K]	Transcription;	RNA polymerase I termination factor, Myb superfamily	-	row-113
transcript:ENST00000511615	transcript:ENST00000511615	1.93355	4.54764	6.83096e-47	9.24853e-45	up	9.51083	0.388273	458	25	GO:0006357;GO:0070062;GO:0032508;GO:0003690;GO:0001111;GO:0005654;GO:0005667;GO:0005730;GO:0003677;GO:0003697;GO:1905463;GO:0140297;GO:0003723;GO:0005634;GO:0060261;GO:0042802;GO:0000978;GO:0051260;GO:0003713;GO:0051053;GO:0003678;	BP;CC;BP;MF;BP;CC;CC;CC;MF;MF;BP;MF;MF;CC;BP;MF;MF;BP;MF;BP;MF;	regulation of transcription by RNA polymerase II;extracellular exosome;DNA duplex unwinding;double-stranded DNA binding;RNA polymerase II promoter clearance;nucleoplasm;transcription regulator complex;nucleolus;DNA binding;single-stranded DNA binding;negative regulation of DNA duplex unwinding;DNA-binding transcription factor binding;RNA binding;nucleus;positive regulation of transcription initia…	K25815	-	-	PREDICTED: activated RNA polymerase II transcriptional coactivator p15 isoform X3 [Colobus angolensis palliatus]	-	-	Activated RNA polymerase II transcriptional coactivator p15 OS=Pongo abelii OX=9601 GN=SUB1 PE=2 SV=1	4J5CI	K	Activated RNA polymerase II transcriptional coactivator	-	-	-	-	KOG2712	[K]	Transcription;	Transcriptional coactivator	-	row-114
transcript:ENST00000589215	transcript:ENST00000589215	1.221	11.1576	1.08359e-46	1.45444e-44	up	4.43393	0	250	0	GO:0005091;GO:0006914;GO:0005765;GO:0010506;GO:0031902;GO:0035658;	MF;BP;CC;BP;CC;CC;	guanyl-nucleotide exchange factor adaptor activity;autophagy;lysosomal membrane;regulation of autophagy;late endosome membrane;Mon1-Ccz1 complex;	K24763	-	-	PREDICTED: uncharacterized protein C18orf8-like, partial [Propithecus coquereli]	PF21029.1	Regulator of MON1-CCZ1 complex, N-terminal	Regulator of MON1-CCZ1 complex OS=Homo sapiens OX=9606 GN=RMC1 PE=1 SV=2	48YRD	S	Chromosome 18 open reading frame 8	-	-	-	-	KOG2377	[S]	Function unknown;	Uncharacterized conserved protein	-	row-115
transcript:ENST00000542766	transcript:ENST00000542766	2.81099	4.0914	2.78667e-46	3.70842e-44	up	21.273	1.21108	626	47	GO:0030991;GO:0034451;GO:0060271;GO:0015630;GO:0005856;GO:0005737;GO:0035721;GO:0005814;GO:0005929;GO:0097542;	CC;CC;BP;CC;CC;CC;BP;CC;CC;CC;	intraciliary transport particle A;centriolar satellite;cilium assembly;microtubule cytoskeleton;cytoskeleton;cytoplasm;intraciliary retrograde transport;centriole;cilium;ciliary tip;	K19675	-	-	intraflagellar transport protein 43 homolog isoform 2 [Homo sapiens]	PF15305.10	Intraflagellar transport protein 43	Intraflagellar transport protein 43 homolog OS=Homo sapiens OX=9606 GN=IFT43 PE=1 SV=3	4MS2R	S	Intraflagellar transport protein 43	-	-	-	-	-	-	-	-	-	row-116
transcript:ENST00000568784	transcript:ENST00000568784	1.41683	-4.39916	4.0128e-46	5.29486e-44	down	0.223814	4.8251	27	734	-	-	-	-	-	-	-	-	-	-	-	-	-	-	-	-	-	-	-	-	-	-	row-117
transcript:ENST00000510734	transcript:ENST00000510734	1.58299	-6.2915	5.31242e-46	6.95078e-44	down	0.077326	7.33126	4	413	GO:0072583;GO:0006886;GO:0098835;GO:0007269;GO:0060170;GO:0005326;GO:0007049;GO:0005198;GO:0005886;GO:0044877;GO:0032588;GO:0030672;GO:0043231;GO:0016183;GO:0045334;GO:0051020;GO:0098978;GO:0048268;GO:0099631;GO:0030136;GO:0030125;GO:0005819;GO:0016020;GO:0031410;GO:0030130;GO:0098843;GO:0032050;GO:0042277;GO:0030118;GO:0006897;GO:0030669;GO:0036020;GO:0005829;GO:0005802;GO:0006836;GO:0071439;GO:…	BP;BP;CC;BP;CC;MF;BP;MF;CC;MF;CC;CC;CC;BP;CC;MF;CC;BP;CC;CC;CC;CC;CC;CC;CC;CC;MF;MF;CC;BP;CC;CC;CC;CC;BP;CC;CC;CC;BP;	clathrin-dependent endocytosis;intracellular protein transport;presynaptic endocytic zone membrane;neurotransmitter secretion;ciliary membrane;neurotransmitter transmembrane transporter activity;cell cycle;structural molecule activity;plasma membrane;protein-containing complex binding;trans-Golgi network membrane;synaptic vesicle membrane;intracellular membrane-bounded organelle;synaptic vesicle …	K04645	ko04142;ko04144;ko04961;ko05100;ko05016;ko04721	Lysosome;Endocytosis;Endocrine and other factor-regulated calcium reabsorption;Bacterial invasion of epithelial cells;Huntington disease;Synaptic vesicle cycle	clathrin light chain B isoform d [Homo sapiens]	PF01086.21	Clathrin light chain	Clathrin light chain B OS=Homo sapiens OX=9606 GN=CLTB PE=1 SV=1	4MZVQ	U	Clathrin light chain	-	-	-	-	KOG4031	[U]	Intracellular trafficking, secretion, and vesicular transport;	Vesicle coat protein clathrin, light chain	-	row-118
gene:ENSG00000136051	KIAA1033	2.89534	3.30653	2.68442e-45	3.48303e-43	up	17.3037	2.02436	2753	357	GO:0031083;GO:0005768;GO:0016197;GO:0005654;GO:0071203;GO:0006887;GO:0044655;GO:0007032;GO:0015031;GO:0030041;GO:0061462;GO:0031901;GO:0045785;GO:0034315;GO:0140591;GO:0061474;GO:0005769;	CC;CC;BP;CC;CC;BP;BP;BP;BP;BP;BP;CC;BP;BP;BP;CC;CC;	BLOC-1 complex;endosome;endosomal transport;nucleoplasm;WASH complex;exocytosis;phagosome reneutralization;endosome organization;protein transport;actin filament polymerization;protein localization to lysosome;early endosome membrane;positive regulation of cell adhesion;regulation of Arp2/3 complex-mediated actin nucleation;nuclear envelope budding;phagolysosome membrane;early endosome;	K18465	ko04144	Endocytosis	WASH complex subunit 4 isoform 1 [Homo sapiens]	PF14745.10	WASH complex subunit 4, N-terminal	WASH complex subunit 4 OS=Homo sapiens OX=9606 GN=WASHC4 PE=1 SV=2	4MW1N	U	WASH complex subunit 7, N-terminal	-	-	-	-	KOG3578	[S]	Function unknown;	Uncharacterized conserved protein	-	row-119
transcript:ENST00000357390	transcript:ENST00000357390	0.915704	11.0623	8.25275e-45	1.06194e-42	up	2.55884	0	234	0	GO:0090201;GO:1902617;GO:0034389;GO:0009060;GO:0051020;GO:0051602;GO:0016020;GO:0031667;GO:0010628;GO:0007005;GO:1905461;GO:0007006;GO:0051592;GO:0031267;GO:0010042;GO:1903427;GO:0043394;GO:1901857;GO:0071456;GO:2000386;GO:0005739;GO:0051412;GO:0071333;GO:0006697;GO:0003924;GO:0061003;GO:0006986;GO:0014850;GO:0015630;GO:1903576;GO:0030382;GO:0046628;GO:0071287;GO:1904706;GO:0071394;GO:0007283;GO:…	BP;BP;BP;BP;MF;BP;CC;BP;BP;BP;BP;BP;BP;MF;BP;BP;MF;BP;BP;BP;CC;BP;BP;BP;MF;BP;BP;BP;CC;BP;BP;BP;BP;BP;BP;BP;BP;BP;BP;BP;BP;BP;BP;BP;BP;BP;BP;BP;CC;BP;BP;MF;BP;BP;CC;BP;BP;CC;BP;BP;BP;BP;BP;BP;CC;BP;BP;BP;BP;BP;BP;BP;MF;CC;BP;BP;BP;BP;BP;BP;BP;BP;BP;BP;BP;BP;BP;BP;BP;BP;BP;CC;BP;MF;BP;	negative regulation of release of cytochrome c from mitochondria;response to fluoride;lipid droplet organization;aerobic respiration;GTPase binding;response to electrical stimulus;membrane;response to nutrient levels;positive regulation of gene expression;mitochondrion organization;positive regulation of vascular associated smooth muscle cell apoptotic process;mitochondrial membrane organization;…	K21356	ko04621;ko04137	NOD-like receptor signaling pathway;Mitophagy - animal	mitofusin-1 isoform X1 [Homo sapiens]	PF00350.27	Dynamin family	Mitofusin-1 OS=Homo sapiens OX=9606 GN=MFN1 PE=1 SV=3	4N07B	O	fzo-like conserved region	COG1159	GTPase Era, involved in 16S rRNA processing	J	Translation, ribosomal structure and biogenesis	KOG0448	[O]	Posttranslational modification, protein turnover, chaperones;	Mitofusin 1 GTPase, involved in mitochondrila biogenesis	-	row-120
gene:ENSG00000100101	gene:ENSG00000100101	0.55841	-11.1672	1.21901e-44	1.55574e-42	down	0	1.16868	0	323	GO:0019843;GO:0000967;GO:0005730;GO:0042802;GO:0003697;GO:0005737;GO:0003723;GO:0005634;GO:0004527;GO:0006364;	MF;BP;CC;MF;MF;CC;MF;CC;MF;BP;	rRNA binding;rRNA 5'-end processing;nucleolus;identical protein binding;single-stranded DNA binding;cytoplasm;RNA binding;nucleus;exonuclease activity;rRNA processing;	K14851	-	-	nucleolar protein 12 [Homo sapiens]	PF09805.13	Nucleolar protein 12 (25kDa)	Nucleolar protein 12 OS=Homo sapiens OX=9606 GN=NOL12 PE=1 SV=1	4N3KW	S	Nucleolar protein 12 (25kDa)	-	-	-	-	KOG4709	[S]	Function unknown;	Uncharacterized conserved protein	-	row-121
transcript:ENST00000536337	transcript:ENST00000536337	0.926785	-6.56607	2.1656e-44	2.74134e-42	down	0.023314	2.5316	3	378	GO:0046825;GO:0004725;GO:0005634;GO:0001946;GO:0005654;GO:0008285;GO:0003712;GO:0005737;GO:0016311;GO:0006470;GO:0007010;GO:0005856;GO:0030971;	BP;MF;CC;BP;CC;BP;MF;CC;BP;BP;BP;CC;MF;	regulation of protein export from nucleus;protein tyrosine phosphatase activity;nucleus;lymphangiogenesis;nucleoplasm;negative regulation of cell population proliferation;transcription coregulator activity;cytoplasm;dephosphorylation;protein dephosphorylation;cytoskeleton organization;cytoskeleton;receptor tyrosine kinase binding;	K18025	-	-	tyrosine-protein phosphatase non-receptor type 21-like [Canis lupus familiaris]	PF09379.14	FERM N-terminal domain	Tyrosine-protein phosphatase non-receptor type 21 OS=Rattus norvegicus OX=10116 GN=Ptpn21 PE=1 SV=1	4C74X	T	phosphatase, non-receptor type	-	-	-	-	KOG0792	[T]	Signal transduction mechanisms;	Protein tyrosine phosphatase PTPMEG, contains FERM domain	-	row-122
transcript:ENST00000522117	transcript:ENST00000522117	1.01458	-11.1537	2.40889e-44	3.02471e-42	down	0	3.08169	0	320	GO:0006974;GO:0005654;GO:0000228;GO:0000724;GO:0072757;GO:2000781;GO:0031334;GO:0071479;GO:0070202;GO:0072711;GO:0010569;	BP;CC;CC;BP;BP;BP;BP;BP;BP;BP;BP;	DNA damage response;nucleoplasm;nuclear chromosome;double-strand break repair via homologous recombination;cellular response to camptothecin;positive regulation of double-strand break repair;positive regulation of protein-containing complex assembly;cellular response to ionizing radiation;regulation of establishment of protein localization to chromosome;cellular response to hydroxyurea;regulation…	K22806	-	-	DNA repair-scaffolding protein isoform 1 [Homo sapiens]	PF14950.10	Domain of unknown function (DUF4502)	DNA repair-scaffolding protein OS=Homo sapiens OX=9606 GN=SPIDR PE=1 SV=2	4N59K	L	Domain of unknown function (DUF4502)	-	-	-	-	-	-	-	-	-	row-123
transcript:ENST00000440787	transcript:ENST00000440787	2.99968	-4.04226	2.57914e-44	3.21258e-42	down	1.49524	24.6376	40	848	GO:0070062;GO:0030479;GO:0006909;GO:0015629;GO:0044396;GO:0140220;GO:0016331;GO:0060090;GO:0005938;GO:0019899;GO:0005737;GO:0005634;GO:0034314;GO:0031143;GO:0006887;GO:0030674;GO:0003779;GO:0042995;GO:0005200;GO:0045010;GO:0010631;GO:0006897;GO:0005829;GO:0035861;GO:0000147;GO:0030041;GO:0005885;GO:0051015;	CC;CC;BP;CC;BP;CC;BP;MF;CC;MF;CC;CC;BP;CC;BP;MF;MF;CC;MF;BP;BP;BP;CC;CC;BP;BP;CC;MF;	extracellular exosome;actin cortical patch;phagocytosis;actin cytoskeleton;actin cortical patch organization;pathogen-containing vacuole;morphogenesis of embryonic epithelium;molecular adaptor activity;cell cortex;enzyme binding;cytoplasm;nucleus;Arp2/3 complex-mediated actin nucleation;pseudopodium;exocytosis;protein-macromolecule adaptor activity;actin binding;cell projection;structural constit…	K05755	ko05132;ko05100;ko05131;ko04144;ko04666;ko04810;ko05130	Salmonella infection;Bacterial invasion of epithelial cells;Shigellosis;Endocytosis;Fc gamma R-mediated phagocytosis;Regulation of actin cytoskeleton;Pathogenic Escherichia coli infection	actin-related protein 2/3 complex subunit 4 isoform X2 [Myotis lucifugus]	PF05856.16	ARP2/3 complex 20 kDa subunit (ARPC4)	Actin-related protein 2/3 complex subunit 4 OS=Mus musculus OX=10090 GN=Arpc4 PE=1 SV=3	4MQPJ	Z	protein 2 3 complex subunit 4	-	-	-	-	KOG1876	[Z]	Cytoskeleton;	Actin-related protein Arp2/3 complex, subunit ARPC4	-	row-124
transcript:ENST00000473527	transcript:ENST00000473527	1.57408	11.0374	2.84564e-44	3.51639e-42	up	7.86528	0	230	0	-	-	-	-	-	-	-	-	-	-	-	-	-	-	-	-	-	-	-	-	-	-	row-125
transcript:ENST00000480292	transcript:ENST00000480292	1.34085	5.2946	2.93782e-44	3.60172e-42	up	4.77413	0.111177	310	10	GO:0050821;GO:0022857;GO:0061462;GO:0005765;GO:0005764;GO:0042803;	BP;MF;BP;CC;CC;MF;	protein stabilization;transmembrane transporter activity;protein localization to lysosome;lysosomal membrane;lysosome;protein homodimerization activity;	-	-	-	major facilitator superfamily domain-containing protein 1 isoform X1 [Homo sapiens]	-	-	Major facilitator superfamily domain-containing protein 1 OS=Homo sapiens OX=9606 GN=MFSD1 PE=2 SV=2	4N0YD	G	major facilitator superfamily domain containing 1	-	-	-	-	KOG4686	[G]	Carbohydrate transport and metabolism;	Predicted sugar transporter	-	row-126
transcript:ENST00000470121	transcript:ENST00000470121	1.22402	-11.1492	3.026e-44	3.68084e-42	down	0	4.45672	0	319	GO:0006357;GO:0043923;GO:0051321;GO:0005654;GO:0045138;GO:0061575;GO:0009651;GO:0032968;GO:0070692;GO:0003677;GO:0007049;GO:0023052;GO:0051147;GO:0005886;GO:0009506;GO:0032783;GO:0045944;GO:0048471;GO:0007417;GO:0070063;GO:0006397;GO:0009408;GO:0006974;GO:0005700;GO:0043231;GO:0019085;GO:0140693;GO:0060176;GO:0004693;GO:0001223;GO:0046605;GO:0005737;GO:0140297;GO:0006355;GO:0017069;GO:0006366;GO:…	BP;BP;BP;CC;BP;MF;BP;BP;CC;MF;BP;BP;BP;CC;CC;CC;BP;CC;BP;MF;BP;BP;BP;CC;CC;BP;MF;BP;MF;MF;BP;CC;MF;BP;MF;BP;BP;CC;CC;BP;BP;CC;CC;BP;CC;BP;MF;BP;MF;BP;BP;BP;MF;BP;BP;MF;CC;CC;BP;CC;BP;MF;BP;CC;CC;BP;CC;BP;CC;BP;BP;BP;MF;BP;MF;	regulation of transcription by RNA polymerase II;positive regulation by host of viral transcription;meiotic cell cycle;nucleoplasm;nematode male tail tip morphogenesis;cyclin-dependent protein serine/threonine kinase activator activity;response to salt stress;positive regulation of transcription elongation by RNA polymerase II;CTDK-1 complex;DNA binding;cell cycle;signaling;regulation of muscle c…	K23966	-	-	cyclin-L1 isoform X6 [Homo sapiens]	PF00134.27	Cyclin, N-terminal domain	Cyclin-L1 OS=Homo sapiens OX=9606 GN=CCNL1 PE=1 SV=1	4M8K6	D	regulation of cyclin-dependent protein serine/threonine kinase activity	-	-	-	-	KOG0835	[R]	General function prediction only;	Cyclin L	-	row-127
transcript:ENST00000495071	transcript:ENST00000495071	0.856556	-11.1402	4.78248e-44	5.77234e-42	down	0	2.27867	0	317	GO:0006357;GO:0006282;GO:0005615;GO:0000124;GO:0007369;GO:0043484;GO:0045944;GO:0070461;GO:0045893;GO:0003712;GO:0006914;GO:0005634;GO:0045722;	BP;BP;CC;CC;BP;BP;BP;CC;BP;MF;BP;CC;BP;	regulation of transcription by RNA polymerase II;regulation of DNA repair;extracellular space;SAGA complex;gastrulation;regulation of RNA splicing;positive regulation of transcription by RNA polymerase II;SAGA-type complex;positive regulation of DNA-templated transcription;transcription coregulator activity;autophagy;nucleus;positive regulation of gluconeogenesis;	K21245	ko04140	Autophagy - animal	transcription factor SPT20 homolog isoform X8 [Homo sapiens]	PF12090.12	Spt20, SEP domain	Transcription factor SPT20 homolog OS=Homo sapiens OX=9606 GN=SUPT20H PE=1 SV=2	4MYNK	K	gastrulation	-	-	-	-	-	-	-	-	-	row-128
transcript:ENST00000435201	transcript:ENST00000435201	2.27442	3.84531	8.52791e-44	1.02138e-41	up	11.9148	0.812383	651	58	GO:0006357;GO:0097380;GO:0044295;GO:0008013;GO:0021522;GO:0003714;GO:0097154;GO:0001674;GO:0072224;GO:0001223;GO:0001046;GO:0005078;GO:0030516;GO:0016020;GO:0030424;GO:0031430;GO:0021895;GO:0021702;GO:0021853;GO:0048538;GO:0010506;GO:0005856;GO:0007399;GO:0048880;GO:0040024;GO:0045893;GO:0007411;GO:0043565;GO:0035218;GO:0043050;GO:0050808;GO:2000543;GO:0043005;GO:0003148;GO:0007179;GO:0051285;GO:…	BP;BP;CC;MF;BP;MF;BP;CC;BP;MF;MF;MF;BP;CC;CC;CC;BP;BP;BP;BP;BP;CC;BP;BP;BP;BP;BP;MF;BP;BP;BP;BP;CC;BP;BP;CC;BP;BP;BP;BP;MF;BP;MF;CC;BP;BP;BP;MF;MF;BP;CC;BP;BP;BP;CC;BP;BP;MF;MF;CC;BP;BP;BP;BP;BP;MF;BP;BP;BP;BP;BP;CC;BP;BP;BP;BP;CC;BP;CC;BP;BP;BP;BP;BP;BP;CC;BP;BP;BP;BP;BP;BP;BP;CC;MF;MF;BP;BP;BP;BP;BP;BP;BP;BP;BP;BP;BP;CC;BP;BP;MF;BP;BP;BP;BP;BP;BP;MF;CC;BP;BP;MF;BP;MF;MF;BP;BP;BP;BP;BP;MF;BP;BP;…	regulation of transcription by RNA polymerase II;dorsal spinal cord interneuron anterior axon guidance;axonal growth cone;beta-catenin binding;spinal cord motor neuron differentiation;transcription corepressor activity;GABAergic neuron differentiation;female germ cell nucleus;metanephric glomerulus development;transcription coactivator binding;core promoter sequence-specific DNA binding;MAP-kinas…	K05743	ko04666;ko04360;ko05170;ko04810;ko05135	Fc gamma R-mediated phagocytosis;Axon guidance;Human immunodeficiency virus 1 infection;Regulation of actin cytoskeleton;Yersinia infection	LIM domain kinase 1 isoform 1 [Homo sapiens]	PF00412.26	LIM domain	LIM domain kinase 1 OS=Homo sapiens OX=9606 GN=LIMK1 PE=1 SV=3	4N2BX	T	LIM domain kinase 1	-	-	-	-	-	-	-	-	-	row-129
transcript:ENST00000542140	transcript:ENST00000542140	1.20682	-11.1219	9.53992e-44	1.13387e-41	down	0	4.32815	0	313	GO:0006357;GO:0005681;GO:2000767;GO:0007409;GO:0044547;GO:1990841;GO:0006412;GO:0042382;GO:0048599;GO:0045314;GO:0043047;GO:0005840;GO:0031047;GO:1900182;GO:0045944;GO:0042731;GO:1901838;GO:0001651;GO:0106002;GO:0140517;GO:0035332;GO:0010193;GO:0000184;GO:0006366;GO:0097165;GO:0005634;GO:0031370;GO:0006446;GO:0009792;GO:0017148;GO:0000398;GO:0016020;GO:0043560;GO:0009986;GO:0071889;GO:0000122;GO:…	BP;CC;BP;BP;MF;MF;BP;CC;BP;BP;MF;CC;BP;BP;BP;MF;BP;CC;CC;MF;BP;BP;BP;BP;CC;CC;MF;BP;BP;BP;BP;CC;MF;CC;MF;BP;CC;CC;BP;BP;BP;CC;CC;BP;BP;BP;BP;MF;CC;BP;CC;CC;BP;MF;CC;BP;BP;BP;MF;BP;CC;BP;CC;MF;MF;BP;CC;BP;BP;CC;BP;CC;MF;CC;MF;BP;CC;CC;CC;CC;MF;BP;BP;MF;BP;BP;CC;CC;CC;BP;MF;CC;CC;CC;MF;BP;BP;MF;BP;BP;BP;MF;CC;BP;CC;CC;BP;CC;BP;CC;CC;BP;CC;BP;BP;BP;BP;CC;BP;MF;BP;BP;BP;BP;BP;CC;MF;CC;BP;BP;BP;BP;BP;…	regulation of transcription by RNA polymerase II;spliceosomal complex;positive regulation of cytoplasmic translation;axonogenesis;DNA topoisomerase binding;promoter-specific chromatin binding;translation;paraspeckles;oocyte development;regulation of compound eye photoreceptor development;single-stranded telomeric DNA binding;ribosome;regulatory ncRNA-mediated gene silencing;positive regulation of…	K13188	-	-	RNA-binding protein 7 isoform X4 [Gorilla gorilla gorilla]	PF00076.26	RNA recognition motif	RNA-binding protein 7 OS=Homo sapiens OX=9606 GN=RBM7 PE=1 SV=1	4N2BS	A	RNA recognition motif. (a.k.a. RRM, RBD, or RNP domain)	COG0724	RNA recognition motif (RRM) domain	J	Translation, ribosomal structure and biogenesis	KOG4454	[R]	General function prediction only;	RNA binding protein (RRM superfamily)	-	row-130
transcript:ENST00000590870	transcript:ENST00000590870	1.39746	5.03025	3.75919e-43	4.43413e-41	up	5.06088	0.145044	309	12	GO:0005091;GO:0006914;GO:0005765;GO:0010506;GO:0031902;GO:0035658;	MF;BP;CC;BP;CC;CC;	guanyl-nucleotide exchange factor adaptor activity;autophagy;lysosomal membrane;regulation of autophagy;late endosome membrane;Mon1-Ccz1 complex;	K24763	-	-	regulator of MON1-CCZ1 complex isoform 1 [Homo sapiens]	PF21029.1	Regulator of MON1-CCZ1 complex, N-terminal	Regulator of MON1-CCZ1 complex OS=Homo sapiens OX=9606 GN=RMC1 PE=1 SV=2	4MSKU	S	Colon cancer-associated protein Mic1-like	-	-	-	-	KOG2377	[S]	Function unknown;	Uncharacterized conserved protein	-	row-131
transcript:ENST00000566515	transcript:ENST00000566515	1.53156	5.22308	8.53858e-43	9.99592e-41	up	6.22374	0.156985	295	10	GO:0005654;GO:0005737;GO:0007049;GO:0016604;GO:0005634;GO:0051726;	CC;CC;BP;CC;CC;BP;	nucleoplasm;cytoplasm;cell cycle;nuclear body;nucleus;regulation of cell cycle;	K21626	-	-	cyclin-D1-binding protein 1 [Homo sapiens]	PF13324.10	Grap2 and cyclin-D-interacting, N-terminal	Cyclin-D1-binding protein 1 OS=Homo sapiens OX=9606 GN=CCNDBP1 PE=1 SV=2	4N276	S	regulation of cell cycle	-	-	-	-	-	-	-	-	-	row-132
transcript:ENST00000551994	transcript:ENST00000551994	1.06286	-11.0655	1.25084e-42	1.4534e-40	down	0	3.36421	0	301	GO:0005912;GO:0043009;GO:0005829;GO:0005654;GO:0098609;GO:0017022;GO:0002142;GO:0060171;GO:0005634;GO:0005886;GO:0001669;	CC;BP;CC;CC;BP;MF;CC;CC;CC;CC;CC;	adherens junction;chordate embryonic development;cytosol;nucleoplasm;cell-cell adhesion;myosin binding;stereocilia ankle link complex;stereocilium membrane;nucleus;plasma membrane;acrosomal vesicle;	K25703	-	-	vezatin isoform X14 [Homo sapiens]	PF17655.5	Inward rectifier potassium channel C-terminal domain	Vezatin OS=Homo sapiens OX=9606 GN=VEZT PE=1 SV=3	4MIJH	S	Vezatin, adherens junctions transmembrane protein	-	-	-	-	-	-	-	-	-	row-133
MSTRG.5130.3	MSTRG.5130.3	0.685352	10.9401	2.15612e-42	2.48672e-40	up	1.58597	0	215	0	-	-	-	-	-	-	uncharacterized protein LOC107984449 [Homo sapiens]	-	-	-	-	-	-	-	-	-	-	-	-	-	-	-	row-134
transcript:ENST00000583858	transcript:ENST00000583858	1.75018	5.54142	3.88021e-42	4.44227e-40	up	8.77673	0.157497	259	7	GO:0001889;GO:0009274;GO:0030425;GO:0009725;GO:0030855;GO:0046395;GO:0005654;GO:0005743;GO:0003995;GO:0045329;GO:0007507;GO:0005739;GO:0005730;GO:0050660;GO:0009062;GO:0006569;GO:0043958;GO:0042594;GO:0070991;GO:0005886;GO:0006552;GO:0051793;GO:0005759;GO:0006635;GO:0006082;GO:0016401;GO:0046322;GO:0046359;GO:0008470;GO:0031966;GO:0017099;GO:0032981;GO:0016627;GO:0005737;GO:0006550;GO:0004466;GO:…	BP;CC;CC;BP;BP;BP;CC;CC;MF;BP;BP;CC;CC;MF;BP;BP;MF;BP;MF;CC;BP;BP;CC;BP;BP;MF;BP;BP;MF;CC;MF;BP;MF;CC;BP;MF;BP;CC;MF;MF;BP;BP;MF;MF;MF;BP;BP;BP;BP;MF;BP;BP;CC;MF;BP;BP;MF;CC;BP;BP;BP;BP;BP;BP;BP;BP;BP;BP;CC;BP;CC;MF;BP;BP;BP;BP;BP;BP;BP;BP;BP;MF;MF;	liver development;peptidoglycan-based cell wall;dendrite;response to hormone;epithelial cell differentiation;carboxylic acid catabolic process;nucleoplasm;mitochondrial inner membrane;acyl-CoA dehydrogenase activity;carnitine biosynthetic process;heart development;mitochondrion;nucleolus;flavin adenine dinucleotide binding;fatty acid catabolic process;tryptophan catabolic process;acryloyl-CoA red…	K09479	ko01100;ko00071;ko00525;ko01212	Metabolic pathways;Fatty acid degradation;Acarbose and validamycin biosynthesis;Fatty acid metabolism	very long-chain specific acyl-CoA dehydrogenase, mitochondrial isoform X5 [Homo sapiens]	PF00441.28	Acyl-CoA dehydrogenase, C-terminal domain	Very long-chain specific acyl-CoA dehydrogenase, mitochondrial OS=Homo sapiens OX=9606 GN=ACADVL PE=1 SV=1	4N1TQ	C	acyl-CoA dehydrogenase, very long chain	COG1960	Acyl-CoA dehydrogenase related to the alkylation response protein AidB	I	Lipid transport and metabolism	KOG0137	[I]	Lipid transport and metabolism;	Very-long-chain acyl-CoA dehydrogenase	-	row-135
transcript:ENST00000539560	transcript:ENST00000539560	1.75625	-4.09673	5.04826e-42	5.73733e-40	down	0.408547	7.10209	31	683	GO:0006357;GO:0046329;GO:0050804;GO:0001764;GO:0006508;GO:0051081;GO:0000922;GO:0000235;GO:0002098;GO:0005840;GO:0032465;GO:0044877;GO:0140650;GO:0008201;GO:0043248;GO:0030030;GO:0003700;GO:0005634;GO:0097529;GO:0031982;GO:0016042;GO:0005819;GO:0046982;GO:0032447;GO:0030424;GO:0030036;GO:0046469;GO:0004197;GO:0021895;GO:0034452;GO:0061133;GO:0007268;GO:0001675;GO:0031965;GO:0098685;GO:0007399;GO:…	BP;BP;BP;BP;BP;BP;CC;CC;BP;CC;BP;MF;BP;MF;BP;BP;MF;CC;BP;CC;BP;CC;MF;BP;CC;BP;BP;MF;BP;MF;MF;BP;BP;CC;CC;BP;MF;BP;BP;CC;CC;MF;CC;CC;BP;BP;BP;BP;CC;BP;MF;CC;MF;CC;CC;BP;CC;BP;CC;MF;BP;MF;MF;CC;BP;BP;BP;BP;BP;BP;BP;BP;BP;CC;CC;CC;BP;BP;CC;CC;CC;BP;BP;BP;BP;CC;CC;BP;BP;BP;CC;BP;CC;BP;BP;BP;MF;MF;BP;CC;MF;MF;CC;BP;BP;MF;BP;CC;CC;MF;BP;BP;BP;BP;CC;BP;BP;BP;BP;BP;BP;CC;BP;BP;BP;BP;BP;BP;CC;MF;BP;CC;BP;…	regulation of transcription by RNA polymerase II;negative regulation of JNK cascade;modulation of chemical synaptic transmission;neuron migration;proteolysis;nuclear membrane disassembly;spindle pole;astral microtubule;tRNA wobble uridine modification;ribosome;regulation of cytokinesis;protein-containing complex binding;radial glia-guided pyramidal neuron migration;heparin binding;proteasome asse…	K11374	-	-	elongator complex protein 2 isoform 2 [Homo sapiens]	PF00400.36	WD domain, G-beta repeat	Elongator complex protein 2 OS=Homo sapiens OX=9606 GN=ELP2 PE=1 SV=2	4MXTG	BK	WD domain, G-beta repeat	COG2319	WD40 repeat	R	General function prediction only	KOG1063	[BK]	Chromatin structure and dynamics; Transcription;	RNA polymerase II elongator complex, subunit ELP2, WD repeat superfamily	-	row-136
gene:ENSG00000118946	PCDH17	0.456576	10.9131	6.13834e-42	6.92565e-40	up	0.883155	0	211	0	GO:0070062;GO:0097381;GO:0007601;GO:0030425;GO:0050804;GO:0005977;GO:0001841;GO:0009988;GO:0045211;GO:0016331;GO:0005783;GO:0060989;GO:0098685;GO:0045296;GO:0005886;GO:0042734;GO:0050808;GO:0008333;GO:1904071;GO:0043524;GO:0007616;GO:0001756;GO:0098982;GO:0098978;GO:0003723;GO:0007416;GO:0005634;GO:0005911;GO:0098794;GO:0016339;GO:0016020;GO:0036515;GO:0008038;GO:0005576;GO:0007156;GO:0045202;GO:…	CC;CC;BP;CC;BP;BP;BP;BP;CC;BP;CC;BP;CC;MF;CC;CC;BP;BP;BP;BP;BP;BP;CC;CC;MF;BP;CC;CC;CC;BP;CC;BP;BP;CC;BP;CC;CC;BP;CC;BP;MF;BP;BP;MF;BP;BP;BP;BP;BP;BP;BP;BP;BP;BP;BP;	extracellular exosome;photoreceptor disc membrane;visual perception;dendrite;modulation of chemical synaptic transmission;glycogen metabolic process;neural tube formation;cell-cell recognition;postsynaptic membrane;morphogenesis of embryonic epithelium;endoplasmic reticulum;lipid tube assembly involved in organelle fusion;Schaffer collateral - CA1 synapse;cadherin binding;plasma membrane;presynap…	K16499	-	-	protocadherin-17 isoform X1 [Homo sapiens]	PF00028.21	Cadherin domain	Protocadherin-17 OS=Homo sapiens OX=9606 GN=PCDH17 PE=1 SV=2	4MSCS	S	Cadherin-like	COG2931	Ca2+-binding protein, RTX toxin-related	Q	Secondary metabolites biosynthesis, transport and catabolism	KOG3593	[T]	Signal transduction mechanisms;	Predicted receptor-like serine/threonine kinase	-	row-137
gene:ENSG00000132530	XAF1	2.04226	3.51785	1.02902e-41	1.15265e-39	up	9.05593	0.687102	849	95	GO:0032480;GO:0140313;GO:0005634;GO:0005829;GO:0005654;GO:0034097;GO:0005739;GO:0008270;GO:0005737;GO:0046872;GO:0035456;GO:0045824;GO:0006915;GO:0031333;	BP;MF;CC;CC;CC;BP;CC;MF;CC;MF;BP;BP;BP;BP;	negative regulation of type I interferon production;molecular sequestering activity;nucleus;cytosol;nucleoplasm;response to cytokine;mitochondrion;zinc ion binding;cytoplasm;metal ion binding;response to interferon-beta;negative regulation of innate immune response;apoptotic process;negative regulation of protein-containing complex assembly;	-	-	-	XIAP-associated factor 1 isoform 1 [Homo sapiens]	PF18608.5	XIAP-associated factor 1 C-terminal domain	XIAP-associated factor 1 OS=Homo sapiens OX=9606 GN=XAF1 PE=1 SV=1	4MSNJ	K	XIAP associated factor 1	-	-	-	-	-	-	-	-	-	row-138
MSTRG.5130.2	MSTRG.5130.2	1.02946	-4.54082	2.73299e-41	3.03948e-39	down	0.116307	2.73259	17	511	-	-	-	-	-	-	uncharacterized protein LOC107984449 [Homo sapiens]	-	-	-	-	-	-	-	-	-	-	-	-	-	-	-	row-139
transcript:ENST00000562583	transcript:ENST00000562583	1.10951	10.8715	3.93463e-41	4.34483e-39	up	3.65575	0	205	0	GO:0002091;GO:0005794;GO:0048812;GO:0045296;GO:0048471;GO:0005737;GO:0005844;GO:0003723;GO:0010494;GO:1990904;GO:0016020;GO:0050658;GO:0016607;GO:0033962;GO:0021702;GO:0016070;GO:0034063;GO:0050905;GO:0005829;GO:0048872;GO:0005802;GO:0005154;GO:0003729;GO:0016071;GO:0040015;GO:0006417;	BP;CC;BP;MF;CC;CC;CC;MF;CC;CC;CC;BP;CC;BP;BP;BP;BP;BP;CC;BP;CC;MF;MF;BP;BP;BP;	negative regulation of receptor internalization;Golgi apparatus;neuron projection morphogenesis;cadherin binding;perinuclear region of cytoplasm;cytoplasm;obsolete polysome;RNA binding;cytoplasmic stress granule;ribonucleoprotein complex;membrane;RNA transport;nuclear speck;P-body assembly;cerebellar Purkinje cell differentiation;RNA metabolic process;stress granule assembly;neuromuscular process…	K23625	-	-	ataxin-2-like protein isoform X10 [Saimiri boliviensis boliviensis]	-	-	Ataxin-2-like protein OS=Homo sapiens OX=9606 GN=ATXN2L PE=1 SV=2	4J7YS	A	LsmAD	-	-	-	-	KOG2375	[A]	RNA processing and modification;	Protein interacting with poly(A)-binding protein	-	row-140
transcript:ENST00000459640	transcript:ENST00000459640	1.81118	-5.77921	4.49334e-41	4.92686e-39	down	0.153272	9.67849	5	360	GO:0030665;GO:0016020;GO:0030125;GO:0098793;GO:0005829;GO:0140238;GO:0015031;GO:0016192;GO:0005905;GO:0005886;GO:0042626;GO:0006897;	CC;CC;CC;CC;CC;BP;BP;BP;CC;CC;MF;BP;	clathrin-coated vesicle membrane;membrane;clathrin vesicle coat;presynapse;cytosol;presynaptic endocytosis;protein transport;vesicle-mediated transport;clathrin-coated pit;plasma membrane;ATPase-coupled transmembrane transporter activity;endocytosis;	K20069	-	-	adaptin ear-binding coat-associated protein 2 isoform X2 [Homo sapiens]	PF07933.18	Protein of unknown function (DUF1681)	Adaptin ear-binding coat-associated protein 2 OS=Homo sapiens OX=9606 GN=NECAP2 PE=1 SV=1	4M5TI	S	NECAP endocytosis associated 2	-	-	-	-	KOG2500	[S]	Function unknown;	Uncharacterized conserved protein	-	row-141
transcript:ENST00000514886	transcript:ENST00000514886	0.924812	10.8502	8.81796e-41	9.60109e-39	up	2.60406	0	202	0	GO:0035243;GO:0016274;GO:0005737;GO:0032259;GO:0035241;GO:0006397;	MF;MF;CC;BP;MF;BP;	protein-arginine omega-N symmetric methyltransferase activity;protein-arginine N-methyltransferase activity;cytoplasm;methylation;protein-arginine omega-N monomethyltransferase activity;mRNA processing;	K19737	-	-	protein arginine N-methyltransferase 9 isoform X2 [Pan troglodytes]	-	-	Protein arginine N-methyltransferase 9 OS=Homo sapiens OX=9606 GN=PRMT9 PE=1 SV=1	4MZRI	Q	Ribosomal protein L11 methyltransferase (PrmA)	-	-	-	-	-	-	-	-	-	row-142
transcript:ENST00000229866	transcript:ENST00000229866	1.07722	-10.9509	1.60689e-40	1.73745e-38	down	0	3.45195	0	278	GO:0045190;GO:0000781;GO:0005654;GO:0008270;GO:0061630;GO:0004842;GO:0007049;GO:0042393;GO:0006974;GO:0030496;GO:0043130;GO:0006303;GO:0005737;GO:0070534;GO:0005634;GO:0036297;GO:0045739;GO:0051865;GO:0042802;GO:0140861;GO:0003682;GO:0070936;GO:0042803;GO:0035092;GO:0006511;GO:0010212;GO:0005829;GO:0035861;GO:0040029;GO:0006302;GO:0051301;GO:0000151;GO:0031625;GO:0034244;GO:0042770;	BP;CC;CC;MF;MF;MF;BP;MF;BP;CC;MF;BP;CC;BP;CC;BP;BP;BP;MF;BP;MF;BP;MF;BP;BP;BP;CC;CC;BP;BP;BP;CC;MF;BP;BP;	isotype switching;chromosome, telomeric region;nucleoplasm;zinc ion binding;ubiquitin protein ligase activity;ubiquitin-protein transferase activity;cell cycle;histone binding;DNA damage response;midbody;ubiquitin binding;double-strand break repair via nonhomologous end joining;cytoplasm;protein K63-linked ubiquitination;nucleus;interstrand cross-link repair;positive regulation of DNA repair;prot…	K10667	-	-	E3 ubiquitin-protein ligase RNF8 isoform X1 [Pongo abelii]	PF00498.30	FHA domain	E3 ubiquitin-protein ligase RNF8 OS=Pongo abelii OX=9601 GN=RNF8 PE=2 SV=1	4MWQS	B	histone H2A K63-linked ubiquitination	-	-	-	-	KOG3871	[W]	Extracellular structures;	Cell adhesion complex protein bystin	-	row-143
gene:ENSG00000114786	ABHD14A-ACY1	1.16403	10.8286	2.61291e-40	2.80572e-38	up	4.0213	0	199	0	GO:0070062;GO:0016829;GO:0006508;GO:0005654;GO:0019877;GO:0005730;GO:0004181;GO:0008777;GO:0008270;GO:0046872;GO:0051603;GO:0045944;GO:0000328;GO:0005615;GO:0009014;GO:0004180;GO:0005737;GO:0006807;GO:0043605;GO:0008233;GO:0016811;GO:0005634;GO:0005775;GO:0006631;GO:0016020;GO:0005576;GO:0006520;GO:0004046;GO:0005774;GO:0044255;GO:0042802;GO:0050427;GO:0061733;GO:1990845;GO:0006526;GO:0030163;GO:…	CC;MF;BP;CC;BP;CC;MF;MF;MF;MF;BP;BP;CC;CC;MF;MF;CC;BP;BP;MF;MF;CC;CC;BP;CC;CC;BP;MF;CC;BP;MF;BP;MF;BP;BP;BP;MF;BP;CC;BP;MF;BP;CC;BP;	extracellular exosome;lyase activity;proteolysis;nucleoplasm;diaminopimelate biosynthetic process;nucleolus;metallocarboxypeptidase activity;acetylornithine deacetylase activity;zinc ion binding;metal ion binding;proteolysis involved in protein catabolic process;positive regulation of transcription by RNA polymerase II;fungal-type vacuole lumen;extracellular space;succinyl-diaminopimelate desucci…	K14677	ko00220;ko01100;ko01210;ko01230	Arginine biosynthesis;Metabolic pathways;2-Oxocarboxylic acid metabolism;Biosynthesis of amino acids	aminoacylase-1 isoform X1 [Callorhinus ursinus]	PF01546.32	Peptidase family M20/M25/M40	Aminoacylase-1 OS=Homo sapiens OX=9606 GN=ACY1 PE=1 SV=1	4N0B6	E	aminoacylase activity	COG0624	Acetylornithine deacetylase/Succinyl-diaminopimelate desuccinylase or related deacylase	E	Amino acid transport and metabolism	KOG2275	[E]	Amino acid transport and metabolism;	Aminoacylase ACY1 and related metalloexopeptidases	-	row-144
transcript:ENST00000633485	transcript:ENST00000633485	3.79204	-2.98153	5.61061e-40	5.98337e-38	down	4.42303	34.3829	752	7624	GO:0070493;GO:0032038;GO:0072741;GO:0000165;GO:0001817;GO:0030587;GO:0005935;GO:0045296;GO:0032465;GO:0005628;GO:0071277;GO:0031149;GO:0044877;GO:0071520;GO:0090726;GO:0019903;GO:0005078;GO:0005634;GO:1900086;GO:0008361;GO:0051495;GO:0000142;GO:0007173;GO:0009986;GO:0030424;GO:0030036;GO:0010628;GO:0043520;GO:0009898;GO:1900006;GO:0045294;GO:0005902;GO:0031267;GO:1990776;GO:0050982;GO:1903479;GO:…	BP;MF;BP;BP;BP;BP;CC;MF;BP;CC;BP;BP;MF;BP;CC;MF;MF;CC;BP;BP;BP;CC;BP;CC;CC;BP;BP;BP;CC;BP;MF;CC;MF;BP;BP;BP;CC;BP;MF;MF;BP;BP;CC;MF;CC;MF;CC;CC;BP;BP;CC;MF;BP;BP;BP;CC;BP;CC;CC;CC;CC;BP;CC;MF;CC;BP;BP;CC;CC;BP;CC;CC;BP;BP;CC;BP;MF;CC;BP;BP;CC;CC;MF;CC;MF;BP;MF;CC;CC;BP;BP;CC;CC;CC;BP;BP;BP;BP;CC;MF;BP;BP;CC;BP;BP;CC;MF;CC;MF;BP;CC;CC;BP;BP;BP;CC;BP;CC;CC;BP;BP;BP;MF;MF;BP;BP;CC;MF;BP;BP;BP;BP;MF;…	thrombin-activated receptor signaling pathway;myosin II heavy chain binding;protein localization to cell division site;MAPK cascade;regulation of cytokine production;sorocarp development;cellular bud neck;cadherin binding;regulation of cytokinesis;prospore membrane;cellular response to calcium ion;sorocarp stalk cell differentiation;protein-containing complex binding;actomyosin contractile ring a…	K16848	ko05205;ko04520;ko04810	Proteoglycans in cancer;Adherens junction;Regulation of actin cytoskeleton	ras GTPase-activating-like protein IQGAP1 isoform X1 [Homo sapiens]	PF00616.23	GTPase-activator protein for Ras-like GTPase	Ras GTPase-activating-like protein IQGAP1 OS=Homo sapiens OX=9606 GN=IQGAP1 PE=1 SV=1	4MWR2	Z	RasGAP C-terminus	-	-	-	-	KOG2128	[T]	Signal transduction mechanisms;	Ras GTPase-activating protein family - IQGAP	-	row-145
gene:ENSG00000111335	OAS2	2.8285	3.11902	7.82296e-40	8.28595e-38	up	15.3803	2.0804	1815	268	GO:0034138;GO:0051607;GO:0005654;GO:0005739;GO:0005730;GO:0046872;GO:0001730;GO:0005783;GO:0009617;GO:0003677;GO:1900246;GO:0005886;GO:0005840;GO:0006164;GO:0048471;GO:2000342;GO:0001541;GO:0005615;GO:0043231;GO:0001542;GO:0039529;GO:0071650;GO:0005737;GO:0039530;GO:1904188;GO:0042742;GO:0048525;GO:0003723;GO:0005634;GO:0071659;GO:0042593;GO:1903487;GO:0034142;GO:0006401;GO:0016020;GO:0005576;GO:…	BP;BP;CC;CC;CC;MF;MF;CC;BP;MF;BP;CC;CC;BP;CC;BP;BP;CC;CC;BP;BP;BP;CC;BP;BP;BP;BP;MF;CC;BP;BP;BP;BP;BP;CC;CC;BP;BP;BP;MF;BP;MF;MF;BP;CC;BP;BP;BP;BP;CC;BP;BP;BP;MF;BP;BP;BP;BP;MF;BP;BP;BP;BP;	toll-like receptor 3 signaling pathway;defense response to virus;nucleoplasm;mitochondrion;nucleolus;metal ion binding;2'-5'-oligoadenylate synthetase activity;endoplasmic reticulum;response to bacterium;DNA binding;positive regulation of RIG-I signaling pathway;plasma membrane;ribosome;purine nucleotide biosynthetic process;perinuclear region of cytoplasm;negative regulation of chemokine (C-X-C …	K14216	ko05164;ko04621;ko05168;ko05169;ko05162;ko05160	Influenza A;NOD-like receptor signaling pathway;Herpes simplex virus 1 infection;Epstein-Barr virus infection;Measles;Hepatitis C	2'-5'-oligoadenylate synthase 2 isoform 1 [Homo sapiens]	PF10421.13	2'-5'-oligoadenylate synthetase 1, domain 2, C-terminus	2'-5'-oligoadenylate synthase 2 OS=Homo sapiens OX=9606 GN=OAS2 PE=1 SV=3	4MRCV	L	2'-5'-oligoadenylate synthetase 2, 69 71kDa	-	-	-	-	-	-	-	-	-	row-146
transcript:ENST00000419113	transcript:ENST00000419113	1.73627	10.777	2.379e-39	2.50277e-37	up	10.1004	0	192	0	GO:0005747;GO:0042776;GO:0008137;GO:0009060;GO:0005743;GO:0006120;GO:0005739;GO:0032981;	CC;BP;MF;BP;CC;BP;CC;BP;	obsolete mitochondrial respiratory chain complex I;proton motive force-driven mitochondrial ATP synthesis;NADH dehydrogenase (ubiquinone) activity;aerobic respiration;mitochondrial inner membrane;mitochondrial electron transport, NADH to ubiquinone;mitochondrion;mitochondrial respiratory chain complex I assembly;	K03947	ko05010;ko04723;ko05016;ko01100;ko05012;ko00190;ko04932;ko04714	Alzheimer disease;Retrograde endocannabinoid signaling;Huntington disease;Metabolic pathways;Parkinson disease;Oxidative phosphorylation;Non-alcoholic fatty liver disease;Thermogenesis	NADH dehydrogenase [ubiquinone] 1 alpha subcomplex subunit 3 isoform X1 [Homo sapiens]	PF14987.10	NADH dehydrogenase 1 alpha subcomplex subunit 3	NADH dehydrogenase [ubiquinone] 1 alpha subcomplex subunit 3 OS=Pan troglodytes OX=9598 GN=NDUFA3 PE=3 SV=1	4N7K8	C	NADH dehydrogenase complex assembly	-	-	-	-	-	-	-	-	-	row-147
transcript:ENST00000490460	transcript:ENST00000490460	1.41549	10.7695	3.14642e-39	3.2879e-37	up	6.11559	0	191	0	GO:0006357;GO:0005667;GO:0008140;GO:0003677;GO:0006687;GO:0045944;GO:0007165;GO:0048384;GO:0007623;GO:1990837;GO:0032922;GO:0005737;GO:0006355;GO:0001227;GO:0005634;GO:0006631;GO:0019933;GO:0000981;GO:1990589;GO:0000122;GO:0000978;GO:0000785;GO:0048511;GO:0006006;GO:0050896;GO:0051591;GO:0007283;GO:0000977;GO:0030154;GO:0045892;	BP;CC;MF;MF;BP;BP;BP;BP;BP;MF;BP;CC;BP;MF;CC;BP;BP;MF;CC;BP;MF;CC;BP;BP;BP;BP;BP;MF;BP;BP;	regulation of transcription by RNA polymerase II;transcription regulator complex;cAMP response element binding protein binding;DNA binding;glycosphingolipid metabolic process;positive regulation of transcription by RNA polymerase II;signal transduction;retinoic acid receptor signaling pathway;circadian rhythm;sequence-specific double-stranded DNA binding;circadian regulation of gene expression;cy…	K09052	ko04261	Adrenergic signaling in cardiomyocytes	cAMP-responsive element modulator isoform 2 [Homo sapiens]	-	-	cAMP-responsive element modulator OS=Homo sapiens OX=9606 GN=CREM PE=1 SV=6	4N1PV	K	cAMP responsive element modulator	-	-	-	-	KOG3584	[K]	Transcription;	cAMP response element binding protein and related transcription factors	-	row-148
transcript:ENST00000586984	transcript:ENST00000586984	0.966358	-10.8818	3.32782e-39	3.45428e-37	down	0	2.81773	0	265	GO:0007268;GO:0005829;GO:0045202;GO:0060271;GO:1905515;GO:0000922;GO:0097730;GO:0097539;GO:0005813;GO:0005758;GO:0031514;GO:0007005;GO:0005814;	BP;CC;CC;BP;BP;CC;CC;CC;CC;CC;CC;BP;CC;	chemical synaptic transmission;cytosol;synapse;cilium assembly;non-motile cilium assembly;spindle pole;non-motile cilium;ciliary transition fiber;centrosome;mitochondrial intermembrane space;motile cilium;mitochondrion organization;centriole;	K16543	-	-	centrosomal protein of 89 kDa isoform X1 [Homo sapiens]	PF07989.15	Centrosomin N-terminal motif 1	Centrosomal protein of 89 kDa OS=Homo sapiens OX=9606 GN=CEP89 PE=1 SV=3	4MW4U	Z	Centrosomal protein	-	-	-	-	-	-	-	-	-	row-149
MSTRG.7258.3	MSTRG.7258.3	2.14717	3.2552	5.87533e-39	6.0582e-37	up	9.12725	0.937467	1035	139	GO:0019901;GO:0030155;GO:0019904;GO:0060170;GO:0000139;GO:0051216;GO:0007160;GO:0005634;GO:0043588;GO:0070588;GO:0060428;GO:0009986;GO:0031514;GO:0044325;GO:0050982;GO:0036303;GO:0072218;GO:0034405;GO:0016328;GO:0140416;GO:0007507;GO:0005261;GO:0072164;GO:0160040;GO:0016020;GO:0006807;GO:0006816;GO:0072205;GO:0090162;GO:0001701;GO:0060236;GO:0001568;GO:0034703;GO:0098609;GO:0021510;GO:0005794;GO:…	MF;BP;MF;CC;CC;BP;BP;CC;BP;BP;BP;CC;CC;MF;BP;BP;BP;BP;CC;MF;BP;MF;BP;BP;CC;BP;BP;BP;BP;BP;BP;BP;CC;BP;BP;CC;BP;BP;BP;BP;CC;CC;MF;BP;CC;BP;BP;BP;BP;BP;BP;BP;MF;CC;BP;CC;CC;BP;BP;BP;CC;CC;BP;BP;BP;CC;BP;BP;CC;BP;BP;BP;MF;BP;	protein kinase binding;regulation of cell adhesion;protein domain specific binding;ciliary membrane;Golgi membrane;cartilage development;cell-matrix adhesion;nucleus;skin development;calcium ion transmembrane transport;lung epithelium development;cell surface;motile cilium;transmembrane transporter binding;detection of mechanical stimulus;lymph vessel morphogenesis;metanephric ascending thin limb…	-	H00542	O-Antigen repeat unit biosynthesis	polycystin-1 isoform X14 [Homo sapiens]	PF00801.24	PKD domain	Polycystin-1 OS=Homo sapiens OX=9606 GN=PKD1 PE=1 SV=3	4N2ZA	T	Polycystin 1, transient receptor potential channel interacting	-	-	-	-	KOG3599	[PT]	Inorganic ion transport and metabolism; Signal transduction mechanisms;	Ca2+-modulated nonselective cation channel polycystin	-	row-150
gene:ENSG00000070413	DGCR2	0.650782	10.7312	1.28857e-38	1.31993e-36	up	1.46496	0	186	0	GO:0061298;GO:2000162;GO:1990909;GO:0003401;GO:0048539;GO:0072659;GO:0035116;GO:0009950;GO:0110135;GO:0045121;GO:0045944;GO:1990851;GO:0050890;GO:0001944;GO:0042733;GO:0042813;GO:0048514;GO:0016020;GO:0061354;GO:0009986;GO:0008078;GO:0034185;GO:0009887;GO:0014029;GO:0060070;GO:0021795;GO:0090179;GO:0045669;GO:0043065;GO:0060026;GO:0007268;GO:0033687;GO:0098609;GO:0035115;GO:0071397;GO:2000648;GO:…	BP;BP;CC;BP;BP;BP;BP;BP;BP;CC;BP;CC;BP;BP;BP;MF;BP;CC;BP;CC;BP;MF;BP;BP;BP;BP;BP;BP;BP;BP;BP;BP;BP;BP;BP;BP;BP;BP;BP;BP;BP;BP;BP;BP;CC;BP;BP;BP;BP;CC;MF;BP;BP;BP;BP;BP;BP;BP;BP;CC;BP;CC;BP;BP;BP;BP;MF;BP;BP;BP;BP;BP;BP;BP;BP;BP;BP;BP;BP;BP;MF;BP;BP;BP;CC;BP;CC;BP;BP;MF;BP;BP;BP;BP;MF;BP;BP;BP;BP;CC;BP;BP;BP;BP;BP;BP;BP;BP;MF;BP;BP;BP;BP;BP;BP;BP;BP;BP;BP;BP;BP;BP;BP;BP;CC;BP;BP;MF;BP;BP;CC;MF;BP;…	retina vasculature development in camera-type eye;obsolete negative regulation of planar cell polarity pathway involved in cardiac right atrium morphogenesis;Wnt signalosome;axis elongation;bone marrow development;protein localization to plasma membrane;embryonic hindlimb morphogenesis;dorsal/ventral axis specification;Norrin signaling pathway;membrane raft;positive regulation of transcription by…	-	-	-	integral membrane protein DGCR2/IDD isoform 1 precursor [Homo sapiens]	PF00059.25	Lectin C-type domain	Integral membrane protein DGCR2/IDD OS=Homo sapiens OX=9606 GN=DGCR2 PE=1 SV=1	4N2VY	T	von Willebrand factor (vWF) type C domain	-	-	-	-	KOG1215	[T]	Signal transduction mechanisms;	Low-density lipoprotein receptors containing Ca2+-binding EGF-like domains	-	row-151
transcript:ENST00000507018	transcript:ENST00000507018	3.06108	-3.14932	1.76254e-38	1.79364e-36	down	2.29675	20.1284	165	1880	GO:0070062;GO:0007601;GO:0001525;GO:2000343;GO:0003073;GO:0031594;GO:0046872;GO:0008593;GO:0002062;GO:0005886;GO:0062023;GO:0005615;GO:1900025;GO:0008201;GO:0014850;GO:0009888;GO:1990523;GO:0005178;GO:1990138;GO:0007162;GO:0031012;GO:0044344;GO:0005576;GO:0005604;GO:0051179;GO:0009612;GO:0001666;GO:0042802;GO:0071560;GO:0071356;GO:0008283;GO:0030198;GO:0032355;GO:0050896;GO:0071307;GO:0005802;GO:…	CC;BP;BP;BP;BP;CC;MF;BP;BP;CC;CC;CC;BP;MF;BP;BP;BP;MF;BP;BP;CC;BP;CC;CC;BP;BP;BP;MF;BP;BP;BP;BP;BP;BP;BP;CC;BP;MF;BP;MF;MF;MF;BP;	extracellular exosome;visual perception;angiogenesis;positive regulation of chemokine (C-X-C motif) ligand 2 production;regulation of systemic arterial blood pressure;neuromuscular junction;metal ion binding;regulation of Notch signaling pathway;chondrocyte differentiation;plasma membrane;collagen-containing extracellular matrix;extracellular space;negative regulation of substrate adhesion-depend…	K19519	-	-	transforming growth factor-beta-induced protein ig-h3 [Halichoerus grypus]	PF02469.26	Fasciclin domain	Transforming growth factor-beta-induced protein ig-h3 OS=Homo sapiens OX=9606 GN=TGFBI PE=1 SV=1	4N57X	MW	Fasciclin domain	-	-	-	-	KOG1437	[MW]	Cell wall/membrane/envelope biogenesis; Extracellular structures;	Fasciclin and related adhesion glycoproteins	-	row-152
transcript:ENST00000263812	transcript:ENST00000263812	0.923251	10.7078	4.039e-38	4.08359e-36	up	2.59627	0	183	0	GO:0006094;GO:0045333;GO:0005743;GO:0005739;GO:0000515;GO:0043490;GO:0006537;GO:0015813;GO:0006754;GO:0005886;GO:0015810;GO:2001171;GO:0015183;GO:0015172;GO:0015495;GO:0031643;GO:0000514;GO:1904024;GO:0016020;GO:0009066;GO:0042802;GO:0005509;GO:0006839;GO:0043209;GO:0051592;GO:0015812;GO:0042060;GO:0070778;GO:0005313;GO:0010907;	BP;BP;CC;CC;MF;BP;BP;BP;BP;CC;BP;BP;MF;MF;MF;BP;MF;BP;CC;BP;MF;MF;BP;CC;BP;BP;BP;BP;MF;BP;	gluconeogenesis;cellular respiration;mitochondrial inner membrane;mitochondrion;aspartate:glutamate, proton antiporter activity;malate-aspartate shuttle;glutamate biosynthetic process;L-glutamate transmembrane transport;ATP biosynthetic process;plasma membrane;aspartate transmembrane transport;positive regulation of ATP biosynthetic process;L-aspartate transmembrane transporter activity;acidic am…	K15105	-	-	calcium-binding mitochondrial carrier protein Aralar1 isoform X2 [Marmota marmota marmota]	-	-	Electrogenic aspartate/glutamate antiporter SLC25A12, mitochondrial OS=Homo sapiens OX=9606 GN=SLC25A12 PE=1 SV=2	4JB68	C	Solute carrier family 25	-	-	-	-	KOG0751	[C]	Energy production and conversion;	Mitochondrial aspartate/glutamate carrier protein Aralar/Citrin (contains EF-hand Ca2+-binding domains)	-	row-153
transcript:ENST00000636033	transcript:ENST00000636033	1.03676	7.67106	5.38533e-38	5.40965e-36	up	3.2012	0.001891	181	1	-	-	-	-	-	-	acid ceramidase isoform X2 [Marmota monax]	-	-	-	-	-	-	-	-	-	-	-	-	-	-	-	row-154
transcript:ENST00000466678	transcript:ENST00000466678	1.14263	-10.8035	7.57536e-38	7.56079e-36	down	0	3.87455	0	251	GO:0070062;GO:0071944;GO:0086064;GO:0072659;GO:0005890;GO:0032781;GO:0030007;GO:0042470;GO:0005886;GO:0120036;GO:0010976;GO:0086009;GO:0021670;GO:0006814;GO:1990573;GO:0016323;GO:0036126;GO:0006813;GO:0098984;GO:0005737;GO:1903278;GO:0005391;GO:0031253;GO:0071805;GO:0001917;GO:1903976;GO:0009897;GO:0001671;GO:0016020;GO:0006883;GO:0046982;GO:0031589;GO:0030674;GO:0016328;GO:0097450;GO:0045494;GO:…	CC;CC;BP;BP;CC;BP;BP;CC;CC;BP;BP;BP;BP;BP;BP;CC;CC;BP;CC;CC;BP;MF;CC;BP;CC;BP;CC;MF;CC;BP;MF;BP;MF;CC;CC;BP;CC;MF;CC;CC;BP;BP;BP;BP;BP;BP;CC;BP;BP;BP;BP;BP;BP;	extracellular exosome;cell periphery;cell communication by electrical coupling involved in cardiac conduction;protein localization to plasma membrane;sodium:potassium-exchanging ATPase complex;positive regulation of ATP-dependent activity;intracellular potassium ion homeostasis;melanosome;plasma membrane;plasma membrane bounded cell projection organization;positive regulation of neuron projection…	K01540	ko04973;ko04960;ko04972;ko04978;ko04261;ko04974;ko04961;ko04260;ko04976;ko04970;ko04925;ko04964;ko04971;ko04022;ko04911;ko04024;ko04918;ko04919	Carbohydrate digestion and absorption;Aldosterone-regulated sodium reabsorption;Pancreatic secretion;Mineral absorption;Adrenergic signaling in cardiomyocytes;Protein digestion and absorption;Endocrine and other factor-regulated calcium reabsorption;Cardiac muscle contraction;Bile secretion;Salivary secretion;Aldosterone synthesis and secretion;Proximal tubule bicarbonate reclamation;Gastric acid…	sodium/potassium-transporting ATPase subunit beta-3 isoform X4 [Pan troglodytes]	PF00287.22	Sodium / potassium ATPase beta chain	Sodium/potassium-transporting ATPase subunit beta-3 OS=Homo sapiens OX=9606 GN=ATP1B3 PE=1 SV=1	4N56K	P	Sodium / potassium ATPase beta chain	-	-	-	-	KOG3927	[P]	Inorganic ion transport and metabolism;	Na+/K+ ATPase, beta subunit	-	row-155
transcript:ENST00000601612	transcript:ENST00000601612	1.17961	10.6678	1.28297e-37	1.27234e-35	up	4.13094	0	178	0	GO:0006357;GO:0042974;GO:0005654;GO:0005667;GO:0060021;GO:0032968;GO:0005886;GO:0048471;GO:0045944;GO:0001223;GO:0003712;GO:0051123;GO:0006366;GO:0035563;GO:0005634;GO:0070847;GO:0000122;GO:2001178;GO:0060261;GO:0048147;GO:0046965;GO:0006963;GO:0016592;GO:0007399;	BP;MF;CC;CC;BP;BP;CC;CC;BP;MF;MF;BP;BP;BP;CC;CC;BP;BP;BP;BP;MF;BP;CC;BP;	regulation of transcription by RNA polymerase II;nuclear retinoic acid receptor binding;nucleoplasm;transcription regulator complex;roof of mouth development;positive regulation of transcription elongation by RNA polymerase II;plasma membrane;perinuclear region of cytoplasm;positive regulation of transcription by RNA polymerase II;transcription coactivator binding;transcription coregulator activi…	-	-	-	prostate tumor-overexpressed gene 1 protein isoform 2 [Homo sapiens]	PF11232.12	Mediator complex subunit 25 PTOV activation and synapsin 2	Prostate tumor-overexpressed gene 1 protein OS=Homo sapiens OX=9606 GN=PTOV1 PE=1 SV=1	4MHEU	K	Mediator complex subunit 25 PTOV activation and synapsin 2	-	-	-	-	-	-	-	-	-	row-156
transcript:ENST00000549370	transcript:ENST00000549370	1.70987	10.6597	1.7164e-37	1.69141e-35	up	9.70155	0	177	0	GO:0005925;GO:0098793;GO:0005730;GO:0006412;GO:0005783;GO:0022626;GO:0005840;GO:0005791;GO:0002181;GO:0005737;GO:0042788;GO:0003723;GO:0005634;GO:0098794;GO:0022625;GO:0016020;GO:0043249;GO:1990904;GO:0045202;GO:0140242;GO:0003735;GO:0005829;GO:0097421;GO:0140236;	CC;CC;CC;BP;CC;CC;CC;CC;BP;CC;CC;MF;CC;CC;CC;CC;BP;CC;CC;BP;MF;CC;BP;BP;	focal adhesion;presynapse;nucleolus;translation;endoplasmic reticulum;cytosolic ribosome;ribosome;rough endoplasmic reticulum;cytoplasmic translation;cytoplasm;obsolete polysomal ribosome;RNA binding;nucleus;postsynapse;cytosolic large ribosomal subunit;membrane;erythrocyte maturation;ribonucleoprotein complex;synapse;translation at postsynapse;structural constituent of ribosome;cytosol;liver reg…	K02883	ko03010	Ribosome	large ribosomal subunit protein eL18 isoform X2 [Myotis daubentonii]	PF17135.8	Ribosomal protein 60S L18 and 50S L18e	Large ribosomal subunit protein eL18 OS=Mus musculus OX=10090 GN=Rpl18 PE=1 SV=3	48WXM	J	ribosomal protein	-	-	-	-	KOG1714	[J]	Translation, ribosomal structure and biogenesis;	60s ribosomal protein L18	-	row-157
transcript:ENST00000480119	transcript:ENST00000480119	1.2347	10.6515	2.29823e-37	2.25053e-35	up	4.53816	0	176	0	GO:0000398;GO:0016607;GO:0000380;GO:0006913;GO:0046677;GO:0005737;GO:0008380;GO:0005634;	BP;CC;BP;BP;BP;CC;BP;CC;	mRNA splicing, via spliceosome;nuclear speck;alternative mRNA splicing, via spliceosome;nucleocytoplasmic transport;response to antibiotic;cytoplasm;RNA splicing;nucleus;	K24594	-	-	serine/Arginine-related protein 53 isoform X2 [Homo sapiens]	-	-	Serine/Arginine-related protein 53 OS=Homo sapiens OX=9606 GN=RSRC1 PE=1 SV=1	4M6HA	J	serine Arginine-related protein	-	-	-	-	-	-	-	-	-	row-158
gene:ENSG00000134321	RSAD2	1.44978	3.8076	2.55361e-37	2.48498e-35	up	4.8376	0.278266	416	38	GO:0016829;GO:0001650;GO:0050709;GO:0043367;GO:0051607;GO:0005743;GO:0019008;GO:0005811;GO:0005739;GO:0034157;GO:0046872;GO:0005794;GO:0005783;GO:2000553;GO:0005525;GO:0061798;GO:0051539;GO:0005741;GO:0043621;GO:0001503;GO:0030278;GO:0009615;GO:0008152;GO:0005524;GO:0003824;GO:0061799;GO:1904047;GO:0005789;GO:0035710;GO:0034165;GO:0045087;GO:0006777;GO:0045071;GO:0050778;	MF;CC;BP;BP;BP;CC;CC;CC;CC;BP;MF;CC;CC;BP;MF;MF;MF;CC;MF;BP;BP;BP;BP;MF;MF;MF;MF;CC;BP;BP;BP;BP;BP;BP;	lyase activity;fibrillar center;negative regulation of protein secretion;CD4-positive, alpha-beta T cell differentiation;defense response to virus;mitochondrial inner membrane;obsolete molybdopterin synthase complex;lipid droplet;mitochondrion;positive regulation of toll-like receptor 7 signaling pathway;metal ion binding;Golgi apparatus;endoplasmic reticulum;positive regulation of T-helper 2 cel…	K15045	ko05164;ko05160	Influenza A;Hepatitis C	S-adenosylmethionine-dependent nucleotide dehydratase RSAD2 isoform X1 [Homo sapiens]	PF04055.25	Radical SAM superfamily	S-adenosylmethionine-dependent nucleotide dehydratase RSAD2 OS=Homo sapiens OX=9606 GN=RSAD2 PE=1 SV=1	4MTB5	H	Displays antiviral activity against influenza A virus by inhibiting the budding of the virus from the plasma membrane by disturbing the lipid rafts. This is accomplished, at least in part, through binding and inhibition of the enzyme farnesyl diphosphate synthase (FPPS), which is essential for the biosynthesis of isoprenoid-derived lipids. Promotes TLR7 and TLR9-dependent production of IFN-beta p…	COG0535	Radical SAM superfamily maturase, SkfB/NifB/PqqE family	DH	-	-	-	-	-	-	row-159
transcript:ENST00000552994	transcript:ENST00000552994	1.23401	-3.38113	6.98029e-37	6.7505e-35	down	0.312984	3.21394	69	924	GO:0033621;GO:0000178;GO:0005615;GO:0033620;GO:1902802;GO:0030674;GO:0006396;GO:0043144;GO:1902801;GO:0046872;GO:0071920;GO:0140602;GO:1990251;GO:1990477;GO:0016604;GO:0005634;GO:0000785;GO:1990342;GO:1902794;	BP;CC;CC;CC;BP;MF;BP;BP;BP;MF;CC;CC;CC;CC;CC;CC;CC;CC;BP;	nuclear-transcribed mRNA catabolic process, meiosis-specific transcripts;exosome (RNase complex);extracellular space;Mei2 nuclear dot complex;regulation of siRNA-mediated facultative heterochromatin formation;protein-macromolecule adaptor activity;RNA processing;sno(s)RNA processing;regulation of siRNA-independent facultative heterochromatin formation;metal ion binding;cleavage body;nucleolar per…	-	-	-	zinc finger C3H1 domain-containing protein [Homo sapiens]	PF14559.10	Tetratricopeptide repeat	Zinc finger C3H1 domain-containing protein OS=Homo sapiens OX=9606 GN=ZFC3H1 PE=1 SV=3	4MYJ7	S	Putative zinc-finger domain	-	-	-	-	KOG4839	[S]	Function unknown;	Uncharacterized conserved protein	-	row-160
transcript:ENST00000323735	transcript:ENST00000323735	1.16421	-10.7449	8.43059e-37	8.10273e-35	down	0	4.02252	0	241	GO:0016020;GO:0005829;GO:0043066;GO:0005739;GO:0061484;GO:0002039;GO:0050692;GO:1904115;GO:1902254;GO:0005783;GO:0019896;GO:0005789;GO:0007005;GO:0005741;GO:0005634;GO:0040010;GO:0008104;GO:0045944;	CC;CC;BP;CC;BP;MF;MF;CC;BP;CC;BP;CC;BP;CC;CC;BP;BP;BP;	membrane;cytosol;negative regulation of apoptotic process;mitochondrion;hematopoietic stem cell homeostasis;p53 binding;DNA binding domain binding;axon cytoplasm;negative regulation of intrinsic apoptotic signaling pathway by p53 class mediator;endoplasmic reticulum;axonal transport of mitochondrion;endoplasmic reticulum membrane;mitochondrion organization;mitochondrial outer membrane;nucleus;pos…	K24167	-	-	armadillo repeat-containing protein 10 isoform X11 [Homo sapiens]	PF04826.17	Armadillo-like	Armadillo repeat-containing protein 10 OS=Homo sapiens OX=9606 GN=ARMC10 PE=1 SV=1	4N3SG	S	Armadillo-like	-	-	-	-	-	-	-	-	-	row-161
transcript:ENST00000561419	transcript:ENST00000561419	2.75978	-2.97681	1.23932e-36	1.18381e-34	down	1.90329	14.8001	241	2436	GO:0000137;GO:0070062;GO:0007034;GO:0006909;GO:0005739;GO:0030587;GO:0051453;GO:0010908;GO:0072657;GO:0006672;GO:0005794;GO:0005886;GO:0009506;GO:0001403;GO:0006878;GO:0007124;GO:0005797;GO:0005737;GO:0007042;GO:0004888;GO:0042742;GO:0033299;GO:0009536;GO:0009624;GO:0005634;GO:0005773;GO:0032009;GO:0016020;GO:0005576;GO:0000329;GO:0005801;GO:0006882;GO:0031589;GO:0031410;GO:0001666;GO:0061462;GO:…	CC;CC;BP;BP;CC;BP;BP;BP;BP;BP;CC;CC;CC;BP;BP;BP;CC;CC;BP;MF;BP;BP;CC;BP;CC;CC;CC;CC;CC;CC;CC;BP;BP;CC;BP;BP;BP;CC;BP;BP;BP;CC;CC;CC;CC;BP;BP;BP;CC;CC;BP;BP;BP;CC;CC;BP;BP;CC;BP;CC;	Golgi cis cisterna;extracellular exosome;vacuolar transport;phagocytosis;mitochondrion;sorocarp development;regulation of intracellular pH;regulation of heparan sulfate proteoglycan biosynthetic process;protein localization to membrane;ceramide metabolic process;Golgi apparatus;plasma membrane;plasmodesma;invasive growth in response to glucose limitation;intracellular copper ion homeostasis;pseud…	K17085	-	-	PREDICTED: charged multivesicular body protein 4a-like isoform X3 [Chrysochloris asiatica]	PF02990.20	Endomembrane protein 70	Transmembrane 9 superfamily member 1 OS=Homo sapiens OX=9606 GN=TM9SF1 PE=2 SV=2	4KRSW	U	Transmembrane 9 superfamily member	-	-	-	-	KOG1277	[U]	Intracellular trafficking, secretion, and vesicular transport;	Endosomal membrane proteins, EMP70	-	row-162
gene:ENSG00000258941	RP11-407N17.3	0.613711	10.61	1.34888e-36	1.28061e-34	up	1.34148	0	171	0	GO:0000137;GO:0070973;GO:0070971;GO:0005788;GO:0006888;GO:0008083;GO:0007160;GO:0033363;GO:0005783;GO:0007029;GO:0005794;GO:0051047;GO:0038024;GO:2000402;GO:0005615;GO:0043231;GO:0042953;GO:0007030;GO:0030336;GO:0002687;GO:0001502;GO:0007162;GO:0002042;GO:0032527;GO:0007605;GO:0016020;GO:0005576;GO:0002063;GO:0006887;GO:0042632;GO:1903038;GO:0030501;GO:0005789;GO:0012505;GO:0030198;GO:0009306;GO:…	CC;BP;CC;CC;BP;MF;BP;BP;CC;BP;CC;BP;MF;BP;CC;CC;BP;BP;BP;BP;BP;BP;BP;BP;BP;CC;CC;BP;BP;BP;BP;BP;CC;CC;BP;BP;BP;BP;BP;CC;BP;BP;MF;BP;BP;	Golgi cis cisterna;protein localization to endoplasmic reticulum exit site;endoplasmic reticulum exit site;endoplasmic reticulum lumen;endoplasmic reticulum to Golgi vesicle-mediated transport;growth factor activity;cell-matrix adhesion;secretory granule organization;endoplasmic reticulum;endoplasmic reticulum organization;Golgi apparatus;positive regulation of secretion;cargo receptor activity;n…	K23703	-	-	melanoma inhibitory activity protein 2 isoform X2 [Pan paniscus]	PF07653.21	Variant SH3 domain	Melanoma inhibitory activity protein 2 OS=Mus musculus OX=10090 GN=Mia2 PE=1 SV=3	4MZH9	T	Src homology 3 domains	-	-	-	-	-	-	-	-	-	row-163
gene:ENSG00000185745	IFIT1	4.07894	2.8971	1.77991e-36	1.67959e-34	up	43.0645	5.48152	2392	412	GO:0003690;GO:0015629;GO:0051607;GO:0000049;GO:0019060;GO:0005739;GO:0008266;GO:0071357;GO:0009617;GO:0005783;GO:0005886;GO:0051097;GO:0032091;GO:0045177;GO:0032587;GO:0005737;GO:0003723;GO:0043657;GO:0035457;GO:0009615;GO:0008285;GO:0045070;GO:0000339;GO:0042802;GO:0071360;GO:0140374;GO:0043065;GO:0035634;GO:0035458;GO:0005829;GO:0043066;GO:0045087;GO:0043123;GO:0008637;GO:0045071;GO:0006915;GO:…	MF;CC;BP;MF;BP;CC;MF;BP;BP;CC;CC;BP;BP;CC;CC;CC;MF;CC;BP;BP;BP;BP;MF;MF;BP;BP;BP;BP;BP;CC;BP;BP;BP;BP;BP;BP;MF;	double-stranded DNA binding;actin cytoskeleton;defense response to virus;tRNA binding;intracellular transport of viral protein in host cell;mitochondrion;poly(U) RNA binding;cellular response to type I interferon;response to bacterium;endoplasmic reticulum;plasma membrane;negative regulation of helicase activity;negative regulation of protein binding;apical part of cell;ruffle membrane;cytoplasm;…	K14217	ko05160	Hepatitis C	interferon-induced protein with tetratricopeptide repeats 1 isoform 1 [Homo sapiens]	PF07719.21	Tetratricopeptide repeat	Interferon-induced protein with tetratricopeptide repeats 1 OS=Homo sapiens OX=9606 GN=IFIT1 PE=1 SV=2	4N1SK	S	Tetratricopeptide repeat	COG4783	Outer membrane protein chaperone/metalloprotease BepA/YfgC, contains M48 and TPR domains	MO	-	KOG1123	[KL]	Transcription; Replication, recombination and repair;	RNA polymerase II transcription initiation/nucleotide excision repair factor TFIIH, 3'-5' helicase subunit SSL2	-	row-164
transcript:ENST00000411922	transcript:ENST00000411922	1.40596	5.11042	1.82036e-36	1.70741e-34	up	5.1878	0.134849	219	8	GO:0006488;GO:0005783;GO:0005789;GO:0000033;GO:0052925;GO:0006486;	BP;CC;CC;MF;MF;BP;	dolichol-linked oligosaccharide biosynthetic process;endoplasmic reticulum;endoplasmic reticulum membrane;alpha-1,3-mannosyltransferase activity;dol-P-Man:Man(5)GlcNAc(2)-PP-Dol alpha-1,3-mannosyltransferase activity;protein glycosylation;	K03845	ko00510;ko01100	N-Glycan biosynthesis;Metabolic pathways	dol-P-Man:Man(5)GlcNAc(2)-PP-Dol alpha-1,3-mannosyltransferase isoform a [Homo sapiens]	PF13550.10	Putative phage tail protein	Dol-P-Man:Man(5)GlcNAc(2)-PP-Dol alpha-1,3-mannosyltransferase OS=Homo sapiens OX=9606 GN=ALG3 PE=1 SV=1	4N5PC	G	Adds the first Dol-P-Man derived mannose in an alpha-1,3 linkage to Man5GlcNAc2-PP-Dol	-	-	-	-	KOG2762	[G]	Carbohydrate transport and metabolism;	Mannosyltransferase	-	row-165
transcript:ENST00000636920	transcript:ENST00000636920	1.01718	-10.6962	5.72165e-36	5.3345e-34	down	0	3.09639	0	233	-	-	-	K12348	ko04071;ko01100;ko04142;ko00600	Sphingolipid signaling pathway;Metabolic pathways;Lysosome;Sphingolipid metabolism	acid ceramidase isoform X3 [Equus quagga]	-	-	-	4M5ZK	O	N-acylsphingosine amidohydrolase (acid ceramidase) 1	-	-	-	-	-	-	-	-	-	row-166
transcript:ENST00000565296	transcript:ENST00000565296	1.17413	5.36452	6.82293e-36	6.32339e-34	up	3.70101	0.083187	197	6	GO:0005654;GO:0005737;GO:0007049;GO:0016604;GO:0005634;GO:0051726;	CC;CC;BP;CC;CC;BP;	nucleoplasm;cytoplasm;cell cycle;nuclear body;nucleus;regulation of cell cycle;	K21626	-	-	cyclin-D1-binding protein 1 [Homo sapiens]	PF13324.10	Grap2 and cyclin-D-interacting, N-terminal	Cyclin-D1-binding protein 1 OS=Homo sapiens OX=9606 GN=CCNDBP1 PE=1 SV=2	4N276	S	regulation of cell cycle	-	-	-	-	-	-	-	-	-	row-167
gene:ENSG00000183486	MX2	2.19809	3.1467	1.47461e-35	1.35856e-33	up	9.36506	1.03147	822	119	GO:0072583;GO:0031802;GO:0072659;GO:0040008;GO:0036466;GO:0090383;GO:0120283;GO:0030516;GO:0061829;GO:0005522;GO:0016020;GO:0051179;GO:0030424;GO:1901612;GO:0010508;GO:0043065;GO:0005768;GO:0005547;GO:0008637;GO:0032970;GO:0005856;GO:0045893;GO:0071333;GO:0060976;GO:0009416;GO:0043005;GO:1905345;GO:0160040;GO:0061001;GO:0043231;GO:0031966;GO:0015886;GO:0008017;GO:1902856;GO:0007416;GO:1903578;GO:…	BP;MF;BP;BP;BP;BP;MF;BP;CC;MF;CC;BP;CC;MF;BP;BP;CC;MF;BP;BP;CC;BP;BP;BP;BP;CC;BP;BP;BP;CC;CC;BP;MF;BP;BP;BP;BP;BP;BP;MF;BP;BP;BP;CC;BP;MF;BP;BP;BP;BP;CC;CC;CC;BP;MF;CC;BP;BP;BP;BP;BP;CC;CC;CC;BP;BP;CC;CC;CC;BP;CC;BP;BP;BP;CC;CC;BP;BP;MF;BP;CC;BP;BP;MF;BP;BP;BP;BP;BP;BP;CC;MF;BP;MF;BP;CC;BP;CC;CC;BP;CC;BP;BP;MF;MF;BP;BP;BP;BP;CC;BP;CC;BP;BP;BP;BP;BP;CC;BP;BP;CC;BP;BP;BP;BP;CC;CC;BP;MF;MF;CC;CC;BP;…	clathrin-dependent endocytosis;type 5 metabotropic glutamate receptor binding;protein localization to plasma membrane;regulation of growth;synaptic vesicle recycling via endosome;phagosome acidification;protein serine/threonine kinase binding;regulation of axon extension;basal tubulobulbar complex;profilin binding;membrane;localization;axon;cardiolipin binding;positive regulation of autophagy;pos…	K14754	-	-	interferon-induced GTP-binding protein Mx2 isoform X1 [Homo sapiens]	PF01031.24	Dynamin central region	Interferon-induced GTP-binding protein Mx2 OS=Homo sapiens OX=9606 GN=MX2 PE=1 SV=1	4MX31	U	Dynamin GTPase effector domain	-	-	-	-	KOG0446	[UR]	Intracellular trafficking, secretion, and vesicular transport; General function prediction only;	Vacuolar sorting protein VPS1, dynamin, and related proteins	-	row-168
transcript:ENST00000549052	transcript:ENST00000549052	1.34758	-10.665	2.29849e-35	2.10515e-33	down	0	5.47622	0	228	GO:0016020;GO:0005246;GO:0008284;GO:1903169;GO:0005886;	CC;MF;BP;BP;CC;	membrane;calcium channel regulator activity;positive regulation of cell population proliferation;regulation of calcium ion transmembrane transport;plasma membrane;	K17356	-	-	tetraspanin-31 isoform X1 [Hylobates moloch]	PF00335.24	Tetraspanin family	Tetraspanin-31 OS=Homo sapiens OX=9606 GN=TSPAN31 PE=1 SV=1	4MWKW	S	Tetraspanin family	-	-	-	-	KOG3882	[R]	General function prediction only;	Tetraspanin family integral membrane protein	-	row-169
transcript:ENST00000493875	transcript:ENST00000493875	0.899434	-4.84981	2.72632e-35	2.48239e-33	down	0.076593	2.23193	9	337	GO:0008355;GO:0045296;GO:0006538;GO:0044877;GO:0019899;GO:0061202;GO:0015842;GO:0030170;GO:0048085;GO:0006587;GO:0046684;GO:0004398;GO:0006520;GO:0006540;GO:0030424;GO:0042335;GO:0009820;GO:0009611;GO:0006589;GO:0006559;GO:0042542;GO:1901566;GO:0048082;GO:0007268;GO:0048786;GO:0019752;GO:0019904;GO:0042424;GO:0042416;GO:0010467;GO:0044306;GO:0006547;GO:0012506;GO:0016597;GO:0043679;GO:0005739;GO:…	BP;MF;BP;MF;MF;CC;BP;MF;BP;BP;BP;MF;BP;BP;CC;BP;BP;BP;BP;BP;BP;BP;BP;BP;CC;BP;MF;BP;BP;BP;CC;BP;CC;MF;CC;CC;CC;CC;BP;BP;CC;CC;BP;BP;CC;BP;BP;BP;MF;BP;CC;MF;BP;BP;CC;CC;BP;MF;CC;BP;BP;CC;CC;CC;BP;BP;CC;MF;CC;BP;BP;CC;BP;BP;BP;MF;BP;BP;BP;MF;BP;CC;MF;BP;BP;MF;MF;MF;CC;BP;CC;CC;BP;BP;BP;MF;BP;BP;BP;CC;BP;BP;MF;BP;BP;MF;MF;BP;BP;BP;MF;CC;	olfactory learning;cadherin binding;glutamate catabolic process;protein-containing complex binding;enzyme binding;clathrin-sculpted gamma-aminobutyric acid transport vesicle membrane;aminergic neurotransmitter loading into synaptic vesicle;pyridoxal phosphate binding;adult chitin-containing cuticle pigmentation;serotonin biosynthetic process from tryptophan;response to pyrethroid;histidine decarb…	K01580	ko00250;ko04727;ko00430;ko00410;ko04940;ko01100;ko00650	Alanine, aspartate and glutamate metabolism;GABAergic synapse;Taurine and hypotaurine metabolism;beta-Alanine metabolism;Type I diabetes mellitus;Metabolic pathways;Butanoate metabolism	glutamate decarboxylase 1 isoform X2 [Eubalaena glacialis]	PF00282.23	Pyridoxal-dependent decarboxylase conserved domain	Glutamate decarboxylase 1 OS=Bos taurus OX=9913 GN=GAD1 PE=2 SV=1	4IXQE	E	Glutamate decarboxylase 1	COG0076	Glutamate or tyrosine decarboxylase or a related PLP-dependent protein	E	Amino acid transport and metabolism	KOG0629	[E]	Amino acid transport and metabolism;	Glutamate decarboxylase and related proteins	-	row-170
transcript:ENST00000574453	transcript:ENST00000574453	0.753962	4.66582	2.94805e-35	2.66867e-33	up	1.67295	0.063997	240	12	-	-	-	-	-	-	-	-	-	-	-	-	-	-	-	-	-	-	-	-	-	-	row-171
transcript:ENST00000392995	transcript:ENST00000392995	0.870409	-6.00409	7.87764e-35	7.08988e-33	down	0.027869	2.25163	3	256	GO:0050921;GO:0030514;GO:0000165;GO:0009651;GO:0050687;GO:0043280;GO:0030148;GO:0044387;GO:0046827;GO:0009620;GO:0009579;GO:0009314;GO:0008138;GO:0005634;GO:1990439;GO:0051496;GO:0016020;GO:1900425;GO:0000122;GO:0010628;GO:0009611;GO:0030335;GO:0010119;GO:0048786;GO:0080005;GO:0045892;GO:0005654;GO:0005739;GO:0045893;GO:1901223;GO:0031507;GO:0032880;GO:0048471;GO:0043005;GO:0030330;GO:0051224;GO:…	BP;BP;BP;BP;BP;BP;BP;BP;BP;BP;CC;BP;MF;CC;MF;BP;CC;BP;BP;BP;BP;BP;BP;CC;BP;BP;CC;CC;BP;BP;BP;BP;CC;CC;BP;BP;BP;CC;CC;BP;BP;BP;BP;CC;BP;CC;BP;MF;MF;BP;BP;MF;BP;BP;BP;CC;BP;BP;BP;MF;BP;CC;BP;BP;BP;MF;CC;CC;BP;CC;BP;BP;BP;MF;BP;BP;BP;BP;BP;BP;BP;BP;BP;BP;CC;MF;MF;BP;MF;BP;BP;BP;BP;BP;BP;MF;BP;MF;BP;BP;BP;BP;BP;BP;CC;BP;BP;BP;BP;BP;BP;MF;MF;CC;BP;BP;BP;MF;BP;MF;BP;	positive regulation of chemotaxis;negative regulation of BMP signaling pathway;MAPK cascade;response to salt stress;negative regulation of defense response to virus;positive regulation of cysteine-type endopeptidase activity involved in apoptotic process;sphingolipid biosynthetic process;negative regulation of protein kinase activity by regulation of protein phosphorylation;positive regulation of…	K10147	ko04115	p53 signaling pathway	protein phosphatase 1D isoform X2 [Pongo abelii]	PF00481.25	Protein phosphatase 2C	Protein phosphatase 1D OS=Homo sapiens OX=9606 GN=PPM1D PE=1 SV=1	4MZ12	T	Serine/threonine phosphatases, family 2C, catalytic domain	-	-	-	-	KOG0698	[T]	Signal transduction mechanisms;	Serine/threonine protein phosphatase	-	row-172
transcript:ENST00000559133	transcript:ENST00000559133	0.615347	-6.50055	9.41655e-35	8.42619e-33	down	0.012894	1.31692	2	245	GO:0006357;GO:0046664;GO:0008083;GO:0007386;GO:1902462;GO:2000241;GO:0042670;GO:0016331;GO:0035116;GO:0045747;GO:0040008;GO:0051145;GO:0045296;GO:0060430;GO:0045687;GO:0035332;GO:0045596;GO:0042593;GO:0071621;GO:0035035;GO:0016020;GO:1901163;GO:1904026;GO:0036099;GO:0030424;GO:0043086;GO:0007443;GO:0048052;GO:0008347;GO:0005080;GO:0043065;GO:2000811;GO:0005768;GO:0071228;GO:0045466;GO:0060289;GO:…	BP;BP;MF;BP;BP;BP;BP;BP;BP;BP;BP;BP;MF;BP;BP;BP;BP;BP;BP;MF;CC;BP;BP;BP;CC;BP;BP;BP;BP;MF;BP;BP;CC;BP;BP;BP;BP;CC;BP;BP;CC;BP;BP;BP;BP;BP;BP;BP;BP;BP;BP;BP;MF;BP;MF;BP;BP;BP;BP;CC;BP;MF;CC;BP;BP;CC;BP;BP;BP;BP;BP;BP;BP;BP;BP;BP;BP;BP;CC;BP;MF;BP;BP;BP;BP;BP;MF;BP;BP;BP;CC;BP;MF;CC;BP;BP;BP;BP;BP;BP;MF;BP;BP;BP;BP;CC;BP;BP;CC;BP;BP;CC;BP;BP;MF;BP;BP;BP;BP;BP;BP;BP;BP;BP;BP;BP;BP;BP;BP;BP;BP;CC;BP;…	regulation of transcription by RNA polymerase II;dorsal closure, amnioserosa morphology change;growth factor activity;compartment pattern specification;positive regulation of mesenchymal stem cell proliferation;regulation of reproductive process;retinal cone cell differentiation;morphogenesis of embryonic epithelium;embryonic hindlimb morphogenesis;positive regulation of Notch signaling pathway;r…	K06825	ko00900;ko04350	Terpenoid backbone biosynthesis;TGF-beta signaling pathway	fibrillin-1 isoform X6 [Symphalangus syndactylus]	PF07645.19	Calcium-binding EGF domain	Fibrillin-1 OS=Homo sapiens OX=9606 GN=FBN1 PE=1 SV=4	4MU0M	T	EGF domain	COG5184	Alpha-tubulin suppressor ATS1 and related RCC1 domain-containing proteins	DZ	-	KOG1217	[T]	Signal transduction mechanisms;	Fibrillins and related proteins containing Ca2+-binding EGF-like domains	-	row-173
transcript:ENST00000542347	transcript:ENST00000542347	2.27585	3.80492	1.98893e-34	1.76958e-32	up	11.824	0.828842	339	31	GO:0042273;GO:0005654;GO:0005730;GO:0001825;GO:0000176;GO:0016070;GO:0005634;GO:0030687;GO:0006364;	BP;CC;CC;BP;CC;BP;CC;CC;BP;	ribosomal large subunit biogenesis;nucleoplasm;nucleolus;blastocyst formation;nuclear exosome (RNase complex);RNA metabolic process;nucleus;preribosome, large subunit precursor;rRNA processing;	K14841	-	-	WD repeat-containing protein 74-like, partial [Theropithecus gelada]	-	-	WD repeat-containing protein 74 OS=Homo sapiens OX=9606 GN=WDR74 PE=1 SV=1	48Y80	S	ribosomal large subunit biogenesis	-	-	-	-	KOG3881	[S]	Function unknown;	Uncharacterized conserved protein	-	row-174
gene:ENSG00000258555	gene:ENSG00000258555	1.58761	3.04992	2.18734e-34	1.93505e-32	up	4.7728	0.564767	859	133	GO:0001650;GO:0008013;GO:0015629;GO:0005654;GO:0007049;GO:0030835;GO:0051897;GO:0008306;GO:0016477;GO:0034332;GO:0043231;GO:0045177;GO:0015630;GO:0005737;GO:0036032;GO:0005634;GO:0005911;GO:0005819;GO:0061713;GO:0007026;GO:0016020;GO:0005921;GO:0030036;GO:0060325;GO:0005829;GO:0007155;GO:0005815;GO:0051301;GO:0031941;GO:0001824;	CC;MF;CC;CC;BP;BP;BP;BP;BP;BP;CC;CC;CC;CC;BP;CC;CC;CC;BP;BP;CC;CC;BP;BP;CC;BP;CC;BP;CC;BP;	fibrillar center;beta-catenin binding;actin cytoskeleton;nucleoplasm;cell cycle;negative regulation of actin filament depolymerization;positive regulation of phosphatidylinositol 3-kinase/protein kinase B signal transduction;associative learning;cell migration;adherens junction organization;intracellular membrane-bounded organelle;apical part of cell;microtubule cytoskeleton;cytoplasm;neural cres…	K23028	-	-	cytospin-A isoform X4 [Pan troglodytes]	PF04108.16	Autophagy protein ATG17-like domain	Cytospin-A OS=Homo sapiens OX=9606 GN=SPECC1L PE=1 SV=3	4MW7R	Z	Sperm antigen with calponin homology and coiled-coil domains	-	-	-	-	KOG4677	[UR]	Intracellular trafficking, secretion, and vesicular transport; General function prediction only;	Golgi integral membrane protein	-	row-175
transcript:ENST00000460404	transcript:ENST00000460404	1.41826	-10.6069	2.21553e-34	1.94891e-32	down	0	6.14297	0	219	GO:0006357;GO:0070062;GO:0099171;GO:0050804;GO:0033138;GO:0005925;GO:0098793;GO:0051497;GO:0003785;GO:1900028;GO:0005546;GO:0032781;GO:0051054;GO:0005938;GO:0001784;GO:0045296;GO:0045944;GO:0010634;GO:0098688;GO:0010633;GO:0005737;GO:0003723;GO:0098978;GO:1900029;GO:0010033;GO:0008064;GO:0005634;GO:0000774;GO:0051496;GO:0008154;GO:0098794;GO:0016020;GO:0050434;GO:0005576;GO:0030837;GO:0030833;GO:…	BP;CC;BP;BP;BP;CC;CC;BP;MF;BP;MF;BP;BP;CC;MF;MF;BP;BP;CC;BP;CC;MF;CC;BP;BP;BP;CC;MF;BP;BP;CC;CC;BP;CC;BP;BP;BP;BP;MF;BP;BP;MF;BP;BP;MF;CC;BP;BP;CC;BP;BP;MF;MF;BP;BP;BP;CC;CC;	regulation of transcription by RNA polymerase II;extracellular exosome;presynaptic modulation of chemical synaptic transmission;modulation of chemical synaptic transmission;positive regulation of peptidyl-serine phosphorylation;focal adhesion;presynapse;negative regulation of stress fiber assembly;actin monomer binding;negative regulation of ruffle assembly;phosphatidylinositol-4,5-bisphosphate b…	K05759	ko05132;ko04015;ko05131;ko04810	Salmonella infection;Rap1 signaling pathway;Shigellosis;Regulation of actin cytoskeleton	profilin-2 isoform X2 [Nomascus leucogenys]	PF00235.23	Profilin	Profilin-2 OS=Rattus norvegicus OX=10116 GN=Pfn2 PE=1 SV=3	4MJ16	Z	Binds to actin and affects the structure of the cytoskeleton. At high concentrations, profilin prevents the polymerization of actin, whereas it enhances it at low concentrations. By binding to PIP2, it inhibits the formation of IP3 and DG	-	-	-	-	KOG1755	[Z]	Cytoskeleton;	Profilin	-	row-176
gene:ENSG00000101255	TRIB3	4.26263	2.75394	2.51805e-34	2.20259e-32	up	46.5672	6.74555	3275	623	GO:0006357;GO:0045059;GO:0005977;GO:0003714;GO:0048821;GO:0043276;GO:0099172;GO:0033762;GO:0003254;GO:0030275;GO:0006974;GO:0048286;GO:0007370;GO:0031588;GO:0030516;GO:0000302;GO:0042593;GO:0045839;GO:0060767;GO:0016020;GO:0030424;GO:0075319;GO:0010508;GO:0043065;GO:0051302;GO:0045793;GO:0010506;GO:0005856;GO:0086003;GO:0014911;GO:0007399;GO:0014823;GO:0030010;GO:0007411;GO:0043050;GO:0009931;GO:…	BP;BP;BP;MF;BP;BP;BP;BP;BP;MF;BP;BP;BP;CC;BP;BP;BP;BP;BP;CC;CC;BP;BP;BP;BP;BP;BP;CC;BP;BP;BP;BP;BP;BP;BP;MF;BP;CC;CC;BP;BP;BP;BP;BP;CC;BP;MF;BP;MF;BP;BP;MF;BP;BP;BP;CC;BP;MF;BP;MF;BP;CC;CC;CC;BP;BP;BP;CC;BP;BP;BP;BP;MF;CC;MF;BP;BP;BP;BP;BP;BP;BP;BP;BP;BP;BP;BP;CC;BP;MF;BP;BP;BP;MF;BP;CC;BP;BP;BP;BP;BP;BP;BP;MF;MF;BP;MF;BP;BP;BP;BP;BP;BP;BP;BP;BP;BP;BP;BP;BP;CC;MF;MF;BP;BP;BP;BP;BP;BP;CC;BP;MF;BP;…	regulation of transcription by RNA polymerase II;positive thymic T cell selection;glycogen metabolic process;transcription corepressor activity;erythrocyte development;anoikis;presynapse organization;response to glucagon;regulation of membrane depolarization;LRR domain binding;DNA damage response;lung alveolus development;ventral furrow formation;nucleotide-activated protein kinase complex;regula…	K19518	ko04931	Insulin resistance	tribbles homolog 3 isoform 2 [Homo sapiens]	PF00069.29	Protein kinase domain	Tribbles homolog 3 OS=Homo sapiens OX=9606 GN=TRIB3 PE=1 SV=2	4N1MC	T	Tribbles pseudokinase 3	COG0515	Serine/threonine protein kinase	T	Signal transduction mechanisms	KOG0583	[T]	Signal transduction mechanisms;	Serine/threonine protein kinase	-	row-177
transcript:ENST00000357048	transcript:ENST00000357048	1.0512	5.10979	3.56639e-34	3.10217e-32	up	3.00312	0.072724	192	7	GO:0048266;GO:0004198;GO:2000310;GO:0007601;GO:0006508;GO:0008307;GO:0032869;GO:0030016;GO:0045862;GO:0012501;GO:0040014;GO:0051603;GO:0045121;GO:0071277;GO:0090628;GO:0019899;GO:0044877;GO:0051493;GO:0007586;GO:0001558;GO:0005634;GO:0009897;GO:0031402;GO:0016020;GO:0045661;GO:0009986;GO:0031667;GO:0031430;GO:0042335;GO:0110158;GO:0030017;GO:0070315;GO:0005876;GO:0004197;GO:0001533;GO:0007005;GO:…	BP;MF;BP;BP;BP;MF;BP;CC;BP;BP;BP;BP;CC;BP;BP;MF;MF;BP;BP;BP;CC;CC;MF;CC;BP;CC;BP;CC;BP;CC;CC;BP;CC;MF;CC;BP;BP;BP;BP;BP;BP;MF;BP;BP;BP;CC;BP;CC;BP;BP;MF;BP;CC;BP;BP;BP;BP;BP;BP;MF;BP;CC;BP;BP;BP;MF;CC;BP;CC;BP;BP;BP;BP;BP;BP;CC;MF;BP;BP;CC;BP;BP;BP;BP;CC;BP;BP;CC;CC;BP;BP;CC;CC;BP;BP;BP;BP;BP;BP;BP;BP;BP;BP;BP;BP;CC;CC;BP;BP;CC;BP;BP;MF;MF;CC;BP;CC;CC;CC;BP;BP;CC;BP;BP;CC;MF;MF;BP;BP;BP;MF;CC;BP;…	behavioral response to pain;calcium-dependent cysteine-type endopeptidase activity;regulation of NMDA receptor activity;visual perception;proteolysis;structural constituent of muscle;cellular response to insulin stimulus;myofibril;positive regulation of proteolysis;programmed cell death;regulation of multicellular organism growth;proteolysis involved in protein catabolic process;membrane raft;cel…	K08579	-	-	calpain-10 isoform X3 [Pan paniscus]	PF00648.25	Calpain family cysteine protease	Calpain-10 OS=Homo sapiens OX=9606 GN=CAPN10 PE=1 SV=2	4MX3D	O	calpain_III	-	-	-	-	KOG0045	[OT]	Posttranslational modification, protein turnover, chaperones; Signal transduction mechanisms;	Cytosolic Ca2+-dependent cysteine protease (calpain), large subunit (EF-Hand protein superfamily)	-	row-178
gene:ENSG00000270136	MINOS1-NBL1	1.04462	10.459	4.55373e-34	3.93897e-32	up	3.25525	0	154	0	GO:0046851;GO:0030514;GO:0061371;GO:0048812;GO:0045944;GO:0008201;GO:0043184;GO:0061098;GO:1900086;GO:0009986;GO:0009887;GO:0014029;GO:0090190;GO:0019221;GO:0003337;GO:1900108;GO:0051973;GO:0048752;GO:0045892;GO:0060173;GO:0007399;GO:0032331;GO:0045893;GO:0060379;GO:2000273;GO:0000902;GO:0007165;GO:0043395;GO:1900155;GO:0003283;GO:0002042;GO:0090291;GO:0005576;GO:0016015;GO:0002689;GO:0010717;GO:…	BP;BP;BP;BP;BP;MF;MF;BP;BP;CC;BP;BP;BP;BP;BP;BP;BP;BP;BP;BP;BP;BP;BP;BP;BP;BP;BP;MF;BP;BP;BP;BP;CC;MF;BP;BP;BP;BP;MF;BP;BP;BP;BP;BP;BP;BP;BP;BP;BP;MF;BP;BP;BP;BP;BP;BP;BP;MF;BP;MF;BP;BP;BP;BP;BP;MF;BP;BP;BP;BP;BP;BP;CC;CC;BP;BP;BP;BP;MF;BP;BP;BP;BP;BP;BP;BP;	negative regulation of bone remodeling;negative regulation of BMP signaling pathway;determination of heart left/right asymmetry;neuron projection morphogenesis;positive regulation of transcription by RNA polymerase II;heparin binding;vascular endothelial growth factor receptor 2 binding;positive regulation of protein tyrosine kinase activity;positive regulation of peptidyl-tyrosine autophosphoryl…	K19558	ko04350	TGF-beta signaling pathway	neuroblastoma suppressor of tumorigenicity 1 isoform a precursor [Homo sapiens]	PF03045.19	DAN domain	Neuroblastoma suppressor of tumorigenicity 1 OS=Homo sapiens OX=9606 GN=NBL1 PE=1 SV=2	4MCUA	S	Neuroblastoma suppressor of tumorigenicity 1	-	-	-	-	-	-	-	-	-	row-179
transcript:ENST00000584668	transcript:ENST00000584668	1.97618	-4.86896	4.59717e-34	3.95458e-32	down	0.337505	10.574	8	304	GO:0001889;GO:0043279;GO:0005681;GO:0043422;GO:0051607;GO:0005654;GO:0060048;GO:0044547;GO:0032868;GO:0005730;GO:0032869;GO:0002244;GO:0000278;GO:0031440;GO:0009636;GO:0048255;GO:0006376;GO:0051028;GO:0035061;GO:0010468;GO:0006397;GO:0010629;GO:0000381;GO:0097400;GO:0110012;GO:0005700;GO:0005737;GO:0048025;GO:0003723;GO:0071013;GO:0001178;GO:0097398;GO:0036002;GO:0005634;GO:0009792;GO:0048709;GO:…	BP;BP;CC;MF;BP;CC;BP;MF;BP;CC;BP;BP;BP;BP;BP;BP;BP;BP;CC;BP;BP;BP;BP;BP;BP;CC;CC;BP;MF;CC;BP;BP;MF;CC;BP;BP;BP;BP;CC;BP;CC;MF;BP;BP;BP;BP;BP;MF;BP;BP;BP;CC;BP;BP;MF;BP;MF;CC;BP;BP;BP;CC;BP;BP;	liver development;response to alkaloid;spliceosomal complex;protein kinase B binding;defense response to virus;nucleoplasm;cardiac muscle contraction;DNA topoisomerase binding;response to insulin;nucleolus;cellular response to insulin stimulus;hematopoietic progenitor cell differentiation;mitotic cell cycle;regulation of mRNA 3'-end processing;response to toxic substance;mRNA stabilization;mRNA s…	K12890	ko03040;ko04657;ko05168	Spliceosome;IL-17 signaling pathway;Herpes simplex virus 1 infection	serine/arginine-rich splicing factor 1 [Echinops telfairi]	PF00076.26	RNA recognition motif	Serine/arginine-rich splicing factor 1 OS=Sus scrofa OX=9823 GN=SRSF1 PE=2 SV=3	48VX3	A	mRNA 5'-splice site recognition	-	-	-	-	KOG0105	[A]	RNA processing and modification;	Alternative splicing factor ASF/SF2 (RRM superfamily)	-	row-180
transcript:ENST00000583994	transcript:ENST00000583994	0.851679	-5.66247	5.22704e-34	4.47171e-32	down	0.035165	2.14595	4	267	GO:0051646;GO:0005743;GO:0005739;GO:0097345;GO:0019896;GO:0007264;GO:0047497;GO:0003924;GO:0046928;GO:0005525;GO:0007165;GO:0034640;GO:0034643;GO:0000226;GO:0005741;GO:0016020;GO:1902513;GO:0007005;GO:0005509;GO:0010821;GO:0048489;GO:1904115;GO:0007015;GO:0019725;GO:0000287;	BP;CC;CC;BP;BP;BP;BP;MF;BP;MF;BP;BP;BP;BP;CC;CC;BP;BP;MF;BP;BP;CC;BP;BP;MF;	mitochondrion localization;mitochondrial inner membrane;mitochondrion;mitochondrial outer membrane permeabilization;axonal transport of mitochondrion;small GTPase-mediated signal transduction;mitochondrion transport along microtubule;GTPase activity;regulation of neurotransmitter secretion;GTP binding;signal transduction;establishment of mitochondrion localization by microtubule attachment;establ…	K07870	ko04137	Mitophagy - animal	PREDICTED: mitochondrial Rho GTPase 1-like, partial [Galeopterus variegatus]	PF08477.17	Ras of Complex, Roc, domain of DAPkinase	Mitochondrial Rho GTPase 1 OS=Homo sapiens OX=9606 GN=RHOT1 PE=1 SV=2	48UYW	V	Mitochondrial GTPase involved in mitochondrial trafficking	-	-	-	-	KOG1707	[V]	Defense mechanisms;	Predicted Ras related/Rac-GTP binding protein	-	row-181
transcript:ENST00000522610	transcript:ENST00000522610	1.22231	-7.30476	7.05628e-34	6.00362e-32	down	0.004229	4.4209	1	225	GO:0016829;GO:0006281;GO:0006284;GO:0005654;GO:0071897;GO:0006259;GO:0006304;GO:0000795;GO:0046872;GO:0003677;GO:0030145;GO:0000724;GO:0008630;GO:0019899;GO:0010332;GO:0010224;GO:0003912;GO:0006974;GO:0044423;GO:0006954;GO:0045471;GO:0007435;GO:0030183;GO:0008017;GO:0005737;GO:0006303;GO:0016445;GO:0006287;GO:0005634;GO:0051575;GO:0071707;GO:0055093;GO:0048535;GO:0006290;GO:0003887;GO:0005876;GO:…	MF;BP;BP;CC;BP;BP;BP;CC;MF;MF;MF;BP;BP;MF;BP;BP;MF;BP;CC;BP;BP;BP;BP;MF;CC;BP;BP;BP;CC;MF;BP;BP;BP;BP;MF;CC;BP;BP;BP;BP;BP;CC;MF;MF;BP;BP;BP;CC;BP;CC;MF;BP;BP;BP;	lyase activity;DNA repair;base-excision repair;nucleoplasm;DNA biosynthetic process;DNA metabolic process;DNA modification;synaptonemal complex;metal ion binding;DNA binding;manganese ion binding;double-strand break repair via homologous recombination;intrinsic apoptotic signaling pathway in response to DNA damage;enzyme binding;response to gamma radiation;response to UV-B;DNA nucleotidylexotrans…	K02330	ko05166;ko03410;ko05203	Human T-cell leukemia virus 1 infection;Base excision repair;Viral carcinogenesis	DNA polymerase beta isoform X6 [Pongo abelii]	PF14716.10	Helix-hairpin-helix domain	DNA polymerase beta OS=Homo sapiens OX=9606 GN=POLB PE=1 SV=3	4MVK4	L	Polymerase (DNA directed), beta	COG1796	DNA polymerase/3'-5' exonuclease PolX	L	Replication, recombination and repair	KOG2534	[L]	Replication, recombination and repair;	DNA polymerase IV (family X)	-	row-182
transcript:ENST00000556428	transcript:ENST00000556428	1.00044	6.05872	7.28345e-34	6.16322e-32	up	2.85015	0.039556	163	3	-	-	-	-	-	-	-	-	-	-	-	-	-	-	-	-	-	-	-	-	-	-	row-183
transcript:ENST00000563065	transcript:ENST00000563065	1.09994	10.4402	8.57737e-34	7.18008e-32	up	3.59439	0	152	0	GO:0005654;GO:0005737;GO:0007049;GO:0016604;GO:0005634;GO:0051726;	CC;CC;BP;CC;CC;BP;	nucleoplasm;cytoplasm;cell cycle;nuclear body;nucleus;regulation of cell cycle;	K21626	-	-	cyclin-D1-binding protein 1 isoform X1 [Callithrix jacchus]	-	-	Cyclin-D1-binding protein 1 OS=Mus musculus OX=10090 GN=Ccndbp1 PE=1 SV=1	4M8K2	S	regulation of cell cycle	-	-	-	-	-	-	-	-	-	row-184
transcript:ENST00000422741	transcript:ENST00000422741	0.872826	10.4402	8.57737e-34	7.18008e-32	up	2.35346	0	152	0	GO:0016020;GO:1900226;GO:0006508;GO:0036312;GO:1990756;GO:0016567;GO:0036211;GO:0006513;GO:0044830;GO:0019903;GO:0050727;GO:0005737;GO:0010506;GO:0031146;GO:0006511;GO:0019005;GO:0051896;GO:0005516;	CC;BP;BP;MF;MF;BP;BP;BP;BP;MF;BP;CC;BP;BP;BP;CC;BP;MF;	membrane;negative regulation of NLRP3 inflammasome complex assembly;proteolysis;phosphatidylinositol 3-kinase regulatory subunit binding;ubiquitin-like ligase-substrate adaptor activity;protein ubiquitination;protein modification process;protein monoubiquitination;modulation by host of viral RNA genome replication;protein phosphatase binding;regulation of inflammatory response;cytoplasm;regulatio…	K10268	-	-	F-box/LRR-repeat protein 2 isoform X1 [Pongo pygmaeus]	-	-	F-box/LRR-repeat protein 2 OS=Homo sapiens OX=9606 GN=FBXL2 PE=1 SV=3	4MCBF	S	F-box and leucine-rich repeat protein 2	-	-	-	-	KOG4341	[R]	General function prediction only;	F-box protein containing LRR	-	row-185
transcript:ENST00000557433	transcript:ENST00000557433	3.13547	2.91982	1.08529e-33	9.03633e-32	up	20.3036	2.62481	1121	190	GO:0005747;GO:0070062;GO:0016597;GO:0009113;GO:0005654;GO:0005743;GO:0006730;GO:0008168;GO:0006545;GO:0005739;GO:0048046;GO:0008266;GO:0046686;GO:0008270;GO:0035999;GO:1904482;GO:0009416;GO:0020011;GO:0022626;GO:0005886;GO:0048027;GO:0006565;GO:0005759;GO:0046655;GO:0002082;GO:0006564;GO:0009506;GO:0009507;GO:0009069;GO:0009853;GO:0055063;GO:0007623;GO:0009626;GO:0030170;GO:0009570;GO:0010319;GO:…	CC;CC;MF;BP;CC;CC;BP;MF;BP;CC;CC;MF;BP;MF;BP;BP;BP;CC;CC;CC;MF;BP;CC;BP;BP;BP;CC;CC;BP;BP;BP;BP;BP;MF;CC;CC;CC;CC;MF;CC;CC;MF;CC;BP;BP;BP;BP;BP;BP;BP;MF;BP;BP;BP;MF;MF;BP;BP;BP;MF;MF;CC;BP;BP;MF;CC;BP;CC;CC;CC;MF;MF;CC;MF;BP;CC;BP;BP;BP;BP;BP;	obsolete mitochondrial respiratory chain complex I;extracellular exosome;amino acid binding;purine nucleobase biosynthetic process;nucleoplasm;mitochondrial inner membrane;one-carbon metabolic process;methyltransferase activity;glycine biosynthetic process;mitochondrion;apoplast;poly(U) RNA binding;response to cadmium ion;zinc ion binding;tetrahydrofolate interconversion;cellular response to tetr…	K00600	ko01200;ko00670;ko00260;ko01100;ko01230;ko01523;ko00630	Carbon metabolism;One carbon pool by folate;Glycine, serine and threonine metabolism;Metabolic pathways;Biosynthesis of amino acids;Antifolate resistance;Glyoxylate and dicarboxylate metabolism	serine hydroxymethyltransferase, mitochondrial isoform 2 precursor [Homo sapiens]	PF00464.23	Serine hydroxymethyltransferase	Serine hydroxymethyltransferase, mitochondrial OS=Homo sapiens OX=9606 GN=SHMT2 PE=1 SV=3	4N1SP	H	Serine hydroxymethyltransferase	COG0112	Glycine/serine hydroxymethyltransferase	E	Amino acid transport and metabolism	KOG2467	[E]	Amino acid transport and metabolism;	Glycine/serine hydroxymethyltransferase	-	row-186
gene:ENSG00000130303	BST2	1.95695	4.08929	1.19055e-33	9.86005e-32	up	9.0191	0.504438	267	20	GO:0002737;GO:0070062;GO:0051607;GO:0070665;GO:0005794;GO:0035456;GO:0005886;GO:0045121;GO:0035577;GO:0043231;GO:0030336;GO:0003723;GO:0030308;GO:0005771;GO:0016020;GO:0009986;GO:0035455;GO:0009615;GO:0005770;GO:0042802;GO:0016324;GO:0042113;GO:0042803;GO:0008191;GO:0045087;GO:0043123;GO:0032956;GO:1901253;GO:0098552;GO:0045071;GO:0034341;	BP;CC;BP;BP;CC;BP;CC;CC;CC;CC;BP;MF;BP;CC;CC;CC;BP;BP;CC;MF;CC;BP;MF;MF;BP;BP;BP;BP;CC;BP;BP;	negative regulation of plasmacytoid dendritic cell cytokine production;extracellular exosome;defense response to virus;positive regulation of leukocyte proliferation;Golgi apparatus;response to interferon-beta;plasma membrane;membrane raft;azurophil granule membrane;intracellular membrane-bounded organelle;negative regulation of cell migration;RNA binding;negative regulation of cell growth;multiv…	K06731	ko05168;ko05170	Herpes simplex virus 1 infection;Human immunodeficiency virus 1 infection	bone marrow stromal antigen 2 precursor [Homo sapiens]	PF16716.9	Bone marrow stromal antigen 2	Bone marrow stromal antigen 2 OS=Homo sapiens OX=9606 GN=BST2 PE=1 SV=1	4N400	U	Bone marrow stromal antigen 2	-	-	-	-	-	-	-	-	-	row-187
transcript:ENST00000380058	transcript:ENST00000380058	0.403737	10.4307	1.62221e-33	1.3364e-31	up	0.750145	0	151	0	GO:0005525;GO:0005730;GO:0005739;GO:0042254;GO:0003723;GO:0000287;GO:0005694;GO:0003924;	MF;CC;CC;BP;MF;MF;CC;MF;	GTP binding;nucleolus;mitochondrion;ribosome biogenesis;RNA binding;magnesium ion binding;chromosome;GTPase activity;	-	-	-	GTP-binding protein 10 isoform X5 [Sapajus apella]	PF01018.26	GTP1/OBG	GTP-binding protein 10 OS=Homo sapiens OX=9606 GN=GTPBP10 PE=1 SV=1	4MTTG	S	GTP1/OBG	-	-	-	-	KOG1489	[R]	General function prediction only;	Predicted GTP-binding protein (ODN superfamily)	-	row-188
transcript:ENST00000418032	transcript:ENST00000418032	1.01496	4.12998	4.1093e-33	3.36747e-31	up	2.57904	0.141038	261	19	GO:0005654;GO:0045893;GO:0046872;GO:0043565;GO:0012501;GO:0010172;GO:0001568;GO:0016581;GO:0005634;GO:0016607;GO:0021506;GO:0000122;GO:0030674;GO:0042659;GO:0001701;GO:0001842;GO:0006338;GO:0006306;GO:2000736;GO:0045892;	CC;BP;MF;MF;BP;BP;BP;CC;CC;CC;BP;BP;MF;BP;BP;BP;BP;BP;BP;BP;	nucleoplasm;positive regulation of DNA-templated transcription;metal ion binding;sequence-specific DNA binding;programmed cell death;embryonic body morphogenesis;blood vessel development;NuRD complex;nucleus;nuclear speck;anterior neuropore closure;negative regulation of transcription by RNA polymerase II;protein-macromolecule adaptor activity;regulation of cell fate specification;in utero embryo…	K23194	-	-	transcriptional repressor p66-alpha isoform X10 [Homo sapiens]	-	-	Transcriptional repressor p66-alpha OS=Homo sapiens OX=9606 GN=GATAD2A PE=1 SV=1	4N6FY	K	GATA zinc finger domain containing	-	-	-	-	-	-	-	-	-	row-189
transcript:ENST00000431180	transcript:ENST00000431180	1.8914	-2.85394	4.33333e-33	3.53246e-31	down	0.884688	6.30291	194	1801	GO:0010228;GO:0048568;GO:0003714;GO:2001032;GO:0032465;GO:0045128;GO:0046975;GO:0005700;GO:0060195;GO:0090548;GO:0140999;GO:0005634;GO:0035035;GO:0006298;GO:0048481;GO:0140952;GO:0000122;GO:0010628;GO:0009910;GO:0060977;GO:0010508;GO:0070201;GO:0048863;GO:0045892;GO:0032727;GO:0046976;GO:0042799;GO:0042974;GO:0005654;GO:0140955;GO:0048298;GO:0045893;GO:0008270;GO:0034728;GO:0043565;GO:0006353;GO:…	BP;BP;MF;BP;BP;BP;MF;CC;BP;BP;MF;CC;MF;BP;BP;MF;BP;BP;BP;BP;BP;BP;BP;BP;BP;MF;MF;MF;CC;MF;BP;BP;MF;BP;MF;BP;BP;BP;BP;BP;BP;BP;MF;CC;BP;BP;BP;BP;BP;BP;BP;BP;MF;CC;BP;MF;MF;BP;BP;BP;MF;BP;MF;BP;BP;BP;BP;BP;BP;BP;MF;BP;CC;BP;CC;BP;MF;BP;BP;MF;MF;BP;BP;BP;MF;BP;BP;CC;CC;BP;MF;BP;BP;BP;CC;BP;BP;BP;BP;BP;MF;BP;BP;MF;MF;BP;MF;MF;CC;BP;MF;BP;BP;BP;BP;MF;BP;BP;BP;MF;BP;BP;BP;BP;MF;BP;	vegetative to reproductive phase transition of meristem;embryonic organ development;transcription corepressor activity;regulation of double-strand break repair via nonhomologous end joining;regulation of cytokinesis;negative regulation of reciprocal meiotic recombination;histone H3K36 methyltransferase activity;polytene chromosome;negative regulation of antisense RNA transcription;response to nit…	K11423	ko00310	Lysine degradation	histone-lysine N-methyltransferase SETD2 isoform X2 [Homo sapiens]	PF17907.5	AWS domain	Histone-lysine N-methyltransferase SETD2 OS=Homo sapiens OX=9606 GN=SETD2 PE=1 SV=3	4N611	K	SET domain containing 2	-	-	-	-	KOG4442	[U]	Intracellular trafficking, secretion, and vesicular transport;	Clathrin coat binding protein/Huntingtin interacting protein HIP1, involved in regulation of endocytosis	-	row-190
transcript:ENST00000555944	transcript:ENST00000555944	0.815781	-10.5187	5.44318e-33	4.41408e-31	down	0	2.09848	0	206	GO:1990730;GO:0000045;GO:0008289;GO:0005694;GO:0043161;GO:0007030;GO:0005795;GO:0046604;GO:0043130;GO:0005737;GO:0005634;GO:1904780;GO:0031468;GO:0061025;GO:0005813;GO:0051117;GO:0006511;GO:0031616;GO:0005829;GO:0000132;	CC;BP;MF;CC;BP;BP;CC;BP;MF;CC;CC;BP;BP;BP;CC;MF;BP;CC;CC;BP;	VCP-NSFL1C complex;autophagosome assembly;lipid binding;chromosome;proteasome-mediated ubiquitin-dependent protein catabolic process;Golgi organization;Golgi stack;positive regulation of mitotic centrosome separation;ubiquitin binding;cytoplasm;nucleus;negative regulation of protein localization to centrosome;nuclear membrane reassembly;membrane fusion;centrosome;ATPase binding;ubiquitin-dependen…	K14012	ko04141	Protein processing in endoplasmic reticulum	NSFL1 cofactor p47 isoform X2 [Microtus fortis]	PF14555.10	UBA-like domain	NSFL1 cofactor p47 OS=Pongo abelii OX=9601 GN=NSFL1C PE=2 SV=1	4M5V1	Y	NSFL1 (P97) cofactor (P47)	-	-	-	-	KOG2086	[Y]	Nuclear structure;	Protein tyrosine phosphatase SHP1/Cofactor for p97 ATPase-mediated vesicle membrane fusion	-	row-191
transcript:ENST00000479719	transcript:ENST00000479719	1.20435	4.24894	7.67445e-33	6.19125e-31	up	3.52019	0.174712	239	16	GO:0090727;GO:0019856;GO:0044205;GO:0006207;GO:0016036;GO:0007040;GO:0046109;GO:0016477;GO:0010332;GO:0040018;GO:0007595;GO:0030447;GO:0010225;GO:0000909;GO:0005737;GO:0007565;GO:0000003;GO:0005634;GO:0046107;GO:0009792;GO:0140453;GO:0004588;GO:0009411;GO:0014070;GO:0008340;GO:0042802;GO:0006222;GO:0004590;GO:0062040;GO:0044406;GO:0071466;GO:0002119;GO:0005829;GO:0048557;GO:0044182;GO:0045335;GO:…	BP;BP;BP;BP;BP;BP;BP;BP;BP;BP;BP;BP;BP;BP;CC;BP;BP;CC;BP;BP;CC;MF;BP;BP;BP;MF;BP;MF;CC;BP;BP;BP;CC;BP;BP;CC;BP;BP;BP;MF;MF;	positive regulation of brood size;pyrimidine nucleobase biosynthetic process;'de novo' UMP biosynthetic process;'de novo' pyrimidine nucleobase biosynthetic process;cellular response to phosphate starvation;lysosome organization;uridine biosynthetic process;cell migration;response to gamma radiation;positive regulation of multicellular organism growth;lactation;filamentous growth;response to UV-C…	K13421	ko00240;ko01100;ko00983	Pyrimidine metabolism;Metabolic pathways;Drug metabolism - other enzymes	uridine 5'-monophosphate synthase [Homo sapiens]	PF00215.28	Orotidine 5'-phosphate decarboxylase / HUMPS family	Uridine 5'-monophosphate synthase OS=Homo sapiens OX=9606 GN=UMPS PE=1 SV=1	4N5DD	F	orotate phosphoribosyltransferase activity	COG0461	Orotate phosphoribosyltransferase	F	Nucleotide transport and metabolism	KOG1377	[F]	Nucleotide transport and metabolism;	Uridine 5'- monophosphate synthase/orotate phosphoribosyltransferase	-	row-192
transcript:ENST00000470669	transcript:ENST00000470669	0.719339	-10.5046	9.85102e-33	7.9062e-31	down	0	1.71072	0	204	GO:0003676;	MF;	nucleic acid binding;	-	-	-	tetratricopeptide repeat protein 14 isoform b [Homo sapiens]	PF00515.32	Tetratricopeptide repeat	Tetratricopeptide repeat protein 14 OS=Homo sapiens OX=9606 GN=TTC14 PE=1 SV=1	4MXBI	S	Ribosomal protein S1-like RNA-binding domain	COG3063	Type IV pilus assembly protein PilF/PilW	NW	-	-	-	-	-	-	row-193
gene:ENSG00000267022	gene:ENSG00000267022	0.609606	10.3722	1.12514e-32	8.98381e-31	up	1.3282	0	145	0	GO:0006357;GO:0022007;GO:0015629;GO:0005654;GO:0021762;GO:0005730;GO:0008270;GO:0046872;GO:0042826;GO:0003677;GO:0043565;GO:0001228;GO:0010526;GO:0017053;GO:0045944;GO:0045668;GO:0001835;GO:1990837;GO:0005737;GO:0022604;GO:0006355;GO:0003723;GO:0003700;GO:0001227;GO:0007010;GO:0005634;GO:0001222;GO:0000981;GO:0060669;GO:0000122;GO:0030097;GO:0001701;GO:0043433;GO:0042802;GO:0003682;GO:0000978;GO:…	BP;BP;CC;CC;BP;CC;MF;MF;MF;MF;MF;MF;BP;CC;BP;BP;BP;MF;CC;BP;BP;MF;MF;MF;BP;CC;MF;MF;BP;BP;BP;BP;BP;MF;MF;MF;CC;BP;BP;CC;MF;MF;BP;BP;CC;BP;BP;	regulation of transcription by RNA polymerase II;convergent extension involved in neural plate elongation;actin cytoskeleton;nucleoplasm;substantia nigra development;nucleolus;zinc ion binding;metal ion binding;histone deacetylase binding;DNA binding;sequence-specific DNA binding;DNA-binding transcription activator activity, RNA polymerase II-specific;retrotransposon silencing;transcription repre…	K09228	ko05168	Herpes simplex virus 1 infection	zinc finger protein 223 isoform X2 [Chlorocebus sabaeus]	PF13465.10	Zinc-finger double domain	Zinc finger protein 223 OS=Homo sapiens OX=9606 GN=ZNF223 PE=1 SV=2	4MP5J	K	krueppel associated box	-	-	-	-	KOG1720	[V]	Defense mechanisms;	Protein tyrosine phosphatase CDC14	zf-C2H2	row-194
transcript:ENST00000511461	transcript:ENST00000511461	0.863901	4.89034	1.5032e-32	1.19413e-30	up	2.10578	0.066473	188	8	GO:0043418;GO:0006306;GO:0009086;GO:0050821;GO:0009235;GO:0071949;GO:0005654;GO:0005829;GO:0003958;GO:0033353;GO:0050660;GO:1904042;GO:0070402;GO:0030586;GO:0010181;GO:0016723;GO:0045111;GO:0050667;GO:0046655;	BP;BP;BP;BP;BP;MF;CC;CC;MF;BP;MF;BP;MF;MF;MF;MF;CC;BP;BP;	homocysteine catabolic process;obsolete DNA methylation;methionine biosynthetic process;protein stabilization;cobalamin metabolic process;FAD binding;nucleoplasm;cytosol;NADPH-hemoprotein reductase activity;S-adenosylmethionine cycle;flavin adenine dinucleotide binding;negative regulation of cystathionine beta-synthase activity;NADPH binding;[methionine synthase] reductase (NADPH) activity;FMN bi…	K00597	-	-	methionine synthase reductase isoform X1 [Gorilla gorilla gorilla]	PF00258.29	Flavodoxin	Methionine synthase reductase OS=Homo sapiens OX=9606 GN=MTRR PE=1 SV=4	4N4SI	C	5-methyltetrahydrofolate-homocysteine methyltransferase reductase	-	-	-	-	KOG1158	[C]	Energy production and conversion;	NADP/FAD dependent oxidoreductase	-	row-195
transcript:ENST00000561852	transcript:ENST00000561852	1.44889	10.3622	1.55956e-32	1.23054e-30	up	6.45275	0	144	0	GO:0007034;GO:0070062;GO:0003406;GO:0016241;GO:0098793;GO:0043679;GO:0045851;GO:0005794;GO:0005886;GO:0009506;GO:0044877;GO:0030665;GO:1902495;GO:0008021;GO:0033181;GO:0030672;GO:0060271;GO:0070986;GO:0060041;GO:0005773;GO:0036295;GO:0035675;GO:0006879;GO:0030670;GO:0007430;GO:0033179;GO:0032438;GO:0016020;GO:0000329;GO:0032009;GO:0001947;GO:0005774;GO:0045176;GO:0016324;GO:0005813;GO:0032991;GO:…	BP;CC;BP;BP;CC;CC;BP;CC;CC;CC;MF;CC;CC;CC;CC;CC;BP;BP;BP;CC;BP;BP;BP;CC;BP;CC;BP;CC;CC;CC;BP;CC;BP;CC;CC;CC;CC;CC;CC;CC;BP;CC;CC;BP;BP;BP;CC;CC;MF;BP;CC;CC;CC;CC;BP;MF;BP;BP;CC;	vacuolar transport;extracellular exosome;retinal pigment epithelium development;regulation of macroautophagy;presynapse;axon terminus;pH reduction;Golgi apparatus;plasma membrane;plasmodesma;protein-containing complex binding;clathrin-coated vesicle membrane;transmembrane transporter complex;synaptic vesicle;plasma membrane proton-transporting V-type ATPase complex;synaptic vesicle membrane;ciliu…	K02146	ko05323;ko04145;ko05120;ko05203;ko05165;ko04142;ko01100;ko00190;ko04966;ko05152;ko04721;ko05110	Rheumatoid arthritis;Phagosome;Epithelial cell signaling in Helicobacter pylori infection;Viral carcinogenesis;Human papillomavirus infection;Lysosome;Metabolic pathways;Oxidative phosphorylation;Collecting duct acid secretion;Tuberculosis;Synaptic vesicle cycle;Vibrio cholerae infection	V-type proton ATPase subunit d 1 isoform X2 [Callorhinus ursinus]	PF01992.20	ATP synthase (C/AC39) subunit	V-type proton ATPase subunit d 1 OS=Pongo abelii OX=9601 GN=ATP6V0D1 PE=2 SV=1	4MG4T	C	Subunit of the integral membrane V0 complex of vacuolar ATPase. Vacuolar ATPase is responsible for acidifying a variety of intracellular compartments in eukaryotic cells, thus providing most of the energy required for transport processes in the vacuolar system	-	-	-	-	KOG2957	[C]	Energy production and conversion;	Vacuolar H+-ATPase V0 sector, subunit d	-	row-196
transcript:ENST00000466690	transcript:ENST00000466690	1.40994	-10.4021	1.56485e-32	1.23054e-30	down	0	6.06107	0	190	GO:0003735;GO:0005743;GO:0005739;GO:0005763;GO:0032543;GO:0005761;	MF;CC;CC;CC;BP;CC;	structural constituent of ribosome;mitochondrial inner membrane;mitochondrion;mitochondrial small ribosomal subunit;mitochondrial translation;mitochondrial ribosome;	K17401	-	-	small ribosomal subunit protein mS22 isoform 1 [Homo sapiens]	PF10245.13	Mitochondrial 28S ribosomal protein S22	Small ribosomal subunit protein mS22 OS=Homo sapiens OX=9606 GN=MRPS22 PE=1 SV=1	4MUF1	J	ribosomal protein S22	-	-	-	-	KOG3890	[J]	Translation, ribosomal structure and biogenesis;	Mitochondrial 28S ribosomal protein S22	-	row-197
gene:ENSG00000122643	NT5C3A	2.62622	3.05869	1.7054e-32	1.32915e-30	up	13.6821	1.59629	650	100	GO:0051607;GO:0005654;GO:0005739;GO:0008252;GO:0005783;GO:0006248;GO:0008253;GO:0016740;GO:0046079;GO:0005737;GO:0006249;GO:0106411;GO:0009158;GO:0043928;GO:0046085;GO:0016604;GO:0046050;GO:0009117;GO:0000166;GO:0016787;GO:0000215;GO:0005829;GO:1901069;GO:0016311;GO:0006213;GO:0000287;GO:0046074;	BP;CC;CC;MF;CC;BP;MF;MF;BP;CC;BP;MF;BP;BP;BP;CC;BP;BP;MF;MF;MF;CC;BP;BP;BP;MF;BP;	defense response to virus;nucleoplasm;mitochondrion;nucleotidase activity;endoplasmic reticulum;CMP catabolic process;5'-nucleotidase activity;transferase activity;dUMP catabolic process;cytoplasm;dCMP catabolic process;XMP 5'-nucleosidase activity;ribonucleoside monophosphate catabolic process;obsolete exonucleolytic catabolism of deadenylated mRNA;adenosine metabolic process;nuclear body;UMP ca…	K24242	ko00230;ko01100;ko00760;ko00240	Purine metabolism;Metabolic pathways;Nicotinate and nicotinamide metabolism;Pyrimidine metabolism	cytosolic 5'-nucleotidase 3A isoform X1 [Hylobates moloch]	PF05822.16	Pyrimidine 5'-nucleotidase (UMPH-1)	Cytosolic 5'-nucleotidase 3A OS=Homo sapiens OX=9606 GN=NT5C3A PE=1 SV=3	4MW4V	F	Belongs to the pyrimidine 5'-nucleotidase family	-	-	-	-	KOG3128	[S]	Function unknown;	Uncharacterized conserved protein	-	row-198
transcript:ENST00000526491	transcript:ENST00000526491	0.94657	-4.78094	1.70732e-32	1.32915e-30	down	0.07899	2.4425	8	286	GO:0042581;GO:0006508;GO:0001817;GO:0008542;GO:0034241;GO:0045121;GO:0033631;GO:0005912;GO:0022011;GO:0004222;GO:0030336;GO:0002523;GO:0042117;GO:0050729;GO:2000391;GO:0010954;GO:0005634;GO:0033555;GO:0009897;GO:2000415;GO:0016020;GO:0043534;GO:0009986;GO:0030424;GO:0033089;GO:0010628;GO:0007249;GO:0005080;GO:1990830;GO:0030335;GO:0051044;GO:0014037;GO:0042542;GO:0051592;GO:0010042;GO:0098609;GO:…	CC;BP;BP;BP;BP;CC;BP;CC;BP;MF;BP;BP;BP;BP;BP;BP;CC;BP;CC;BP;CC;BP;CC;CC;BP;BP;BP;MF;BP;BP;BP;BP;BP;BP;BP;BP;MF;BP;BP;CC;BP;BP;BP;CC;BP;BP;BP;CC;MF;MF;BP;CC;BP;CC;BP;BP;BP;CC;BP;CC;BP;CC;BP;CC;BP;BP;CC;CC;BP;MF;BP;BP;BP;CC;BP;MF;BP;BP;BP;CC;BP;CC;BP;BP;BP;BP;BP;BP;CC;CC;CC;CC;BP;BP;BP;BP;BP;CC;BP;BP;BP;CC;CC;BP;BP;BP;BP;CC;MF;MF;BP;CC;BP;BP;BP;MF;BP;BP;MF;BP;BP;BP;BP;BP;CC;MF;BP;MF;BP;BP;BP;BP;MF;…	specific granule;proteolysis;regulation of cytokine production;visual learning;positive regulation of macrophage fusion;membrane raft;cell-cell adhesion mediated by integrin;adherens junction;myelination in peripheral nervous system;metalloendopeptidase activity;negative regulation of cell migration;leukocyte migration involved in inflammatory response;monocyte activation;positive regulation of i…	K06836	-	-	disintegrin and metalloproteinase domain-containing protein 15 isoform 6 preproprotein [Homo sapiens]	PF01421.23	Reprolysin (M12B) family zinc metalloprotease	Disintegrin and metalloproteinase domain-containing protein 15 OS=Homo sapiens OX=9606 GN=ADAM15 PE=1 SV=4	4N0C4	O	Homologues of snake disintegrins	-	-	-	-	KOG3607	[O]	Posttranslational modification, protein turnover, chaperones;	Meltrins, fertilins and related Zn-dependent metalloproteinases of the ADAMs family	-	row-199
transcript:ENST00000637429	transcript:ENST00000637429	0.811172	-10.4904	1.78912e-32	1.3859e-30	down	0	2.07875	0	202	-	-	-	-	-	-	acid ceramidase isoform b [Homo sapiens]	-	-	-	4MUK2	C	ceramidase activity	-	-	-	-	-	-	-	-	-	row-200
transcript:ENST00000511087	transcript:ENST00000511087	0.923531	-5.29881	2.82078e-32	2.17423e-30	down	0.050099	2.42603	5	258	GO:1902230;GO:0002027;GO:0016020;GO:0010882;GO:0045739;GO:0098901;GO:0034599;GO:0032526;GO:0005886;GO:0034644;	BP;BP;CC;BP;BP;BP;BP;BP;CC;BP;	negative regulation of intrinsic apoptotic signaling pathway in response to DNA damage;regulation of heart rate;membrane;regulation of cardiac muscle contraction by calcium ion signaling;positive regulation of DNA repair;regulation of cardiac muscle cell action potential;cellular response to oxidative stress;response to retinoic acid;plasma membrane;cellular response to UV;	-	-	-	transmembrane protein 161B-like [Manis javanica]	PF10268.13	Predicted transmembrane protein 161AB	Transmembrane protein 161B OS=Homo sapiens OX=9606 GN=TMEM161B PE=2 SV=1	4Q0I7	S	Transmembrane protein 161B	-	-	-	-	KOG3978	[S]	Function unknown;	Predicted membrane protein	-	row-201
transcript:ENST00000322910	transcript:ENST00000322910	5.22876	2.59021	3.1023e-32	2.37945e-30	up	89.263	14.5781	6086	1297	-	-	-	K09479	ko00071;ko01100;ko01212;ko00525	Fatty acid degradation;Metabolic pathways;Fatty acid metabolism;Acarbose and validamycin biosynthesis	-	-	-	-	-	-	-	-	-	-	-	KOG0137	[I]	Lipid transport and metabolism;	Very-long-chain acyl-CoA dehydrogenase	-	row-202
gene:ENSG00000128271	ADORA2A	1.59194	-3.83455	3.11996e-32	2.38127e-30	down	0.563016	4.81409	23	423	GO:0048266;GO:0031802;GO:0008542;GO:0050995;GO:0019722;GO:0032809;GO:0010765;GO:0055117;GO:0010739;GO:0050965;GO:0090722;GO:0006112;GO:0042593;GO:0016020;GO:0002674;GO:0030424;GO:0051721;GO:0043065;GO:0005768;GO:0043176;GO:0002086;GO:0045453;GO:0051930;GO:0045776;GO:0043195;GO:0007399;GO:0048545;GO:0006091;GO:0030277;GO:0035811;GO:0051967;GO:0007623;GO:0043231;GO:0044297;GO:0042321;GO:0033365;GO:…	BP;MF;BP;BP;BP;CC;BP;BP;BP;BP;MF;BP;BP;CC;BP;CC;MF;BP;CC;MF;BP;BP;BP;BP;CC;BP;BP;BP;BP;BP;BP;BP;CC;CC;BP;BP;BP;BP;BP;BP;BP;BP;MF;BP;MF;BP;BP;BP;CC;CC;BP;BP;MF;BP;CC;BP;MF;CC;BP;BP;BP;BP;BP;BP;BP;BP;BP;BP;BP;BP;BP;BP;CC;MF;BP;BP;BP;BP;MF;CC;BP;BP;MF;MF;MF;BP;BP;BP;BP;BP;BP;MF;MF;CC;CC;BP;CC;BP;BP;BP;BP;BP;BP;MF;MF;BP;BP;MF;BP;BP;CC;BP;BP;BP;CC;BP;BP;BP;BP;BP;BP;CC;BP;MF;BP;BP;BP;CC;CC;BP;MF;BP;CC;…	behavioral response to pain;type 5 metabotropic glutamate receptor binding;visual learning;negative regulation of lipid catabolic process;calcium-mediated signaling;neuronal cell body membrane;positive regulation of sodium ion transport;regulation of cardiac muscle contraction;positive regulation of protein kinase A signaling;detection of temperature stimulus involved in sensory perception of pai…	K04266	ko04015;ko04270;ko05012;ko04024;ko04080;ko05034;ko04020	Rap1 signaling pathway;Vascular smooth muscle contraction;Parkinson disease;cAMP signaling pathway;Neuroactive ligand-receptor interaction;Alcoholism;Calcium signaling pathway	adenosine receptor A2a [Homo sapiens]	PF00001.25	7 transmembrane receptor (rhodopsin family)	Adenosine receptor A2a OS=Homo sapiens OX=9606 GN=ADORA2A PE=1 SV=2	4N2SB	T	positive regulation of acetylcholine secretion, neurotransmission	-	-	-	-	KOG3655	[Z]	Cytoskeleton;	Drebrins and related actin binding proteins	-	row-203
MSTRG.18537.9	MSTRG.18537.9	0.545749	10.3421	4.18032e-32	3.15959e-30	up	1.13095	0	142	0	-	-	-	-	-	-	-	PF07081.15	Protein of unknown function (DUF1349)	-	-	-	-	-	-	-	-	-	-	-	-	-	row-204
transcript:ENST00000552674	transcript:ENST00000552674	0.60464	10.3421	4.18032e-32	3.15959e-30	up	1.31222	0	142	0	GO:0006357;GO:0045582;GO:0008286;GO:0005654;GO:2000819;GO:1902459;GO:0045893;GO:0030850;GO:0071565;GO:0042393;GO:0051276;GO:0045597;GO:0045663;GO:0140092;GO:0045944;GO:0071564;GO:0140288;GO:0045596;GO:0005737;GO:0006366;GO:0001741;GO:0032435;GO:0001673;GO:0005634;GO:0007399;GO:2000045;GO:0016363;GO:0000122;GO:2000781;GO:0009887;GO:0003682;GO:0032991;GO:0006338;GO:0016586;GO:0000785;GO:0016514;GO:…	BP;BP;BP;CC;BP;BP;BP;BP;CC;MF;BP;BP;BP;CC;BP;CC;CC;BP;CC;BP;CC;BP;CC;CC;BP;BP;CC;BP;BP;BP;MF;CC;BP;CC;CC;CC;BP;MF;BP;BP;CC;BP;CC;BP;	regulation of transcription by RNA polymerase II;positive regulation of T cell differentiation;insulin receptor signaling pathway;nucleoplasm;regulation of nucleotide-excision repair;positive regulation of stem cell population maintenance;positive regulation of DNA-templated transcription;prostate gland development;nBAF complex;histone binding;chromosome organization;positive regulation of cell d…	K11649	ko05225;ko04714	Hepatocellular carcinoma;Thermogenesis	SWI/SNF complex subunit SMARCC2 isoform X9 [Homo sapiens]	PF16496.9	SWIRM-associated domain at the N-terminal	SWI/SNF complex subunit SMARCC2 OS=Homo sapiens OX=9606 GN=SMARCC2 PE=1 SV=1	490QN	B	nucleosome disassembly	-	-	-	-	KOG1279	[B]	Chromatin structure and dynamics;	Chromatin remodeling factor subunit and related transcription factors	-	row-205
transcript:ENST00000509126	transcript:ENST00000509126	0.825662	-10.4616	4.40845e-32	3.29998e-30	down	0	2.14122	0	198	GO:0006281;GO:0051321;GO:0005654;GO:0046872;GO:0060090;GO:0070987;GO:0042276;GO:0019985;GO:0006974;GO:0000731;GO:0003697;GO:0005737;GO:0000003;GO:0005634;GO:0009432;GO:0009792;GO:0016607;GO:0003887;GO:0006261;GO:0003684;GO:0016604;GO:0000785;GO:0034644;GO:0006297;GO:0006260;GO:0005829;GO:0036464;GO:0071494;GO:0090734;GO:0000287;	BP;BP;CC;MF;MF;BP;BP;BP;BP;BP;MF;CC;BP;CC;BP;BP;CC;MF;BP;MF;CC;CC;BP;BP;BP;CC;CC;BP;CC;MF;	DNA repair;meiotic cell cycle;nucleoplasm;metal ion binding;molecular adaptor activity;error-free translesion synthesis;error-prone translesion synthesis;translesion synthesis;DNA damage response;DNA synthesis involved in DNA repair;single-stranded DNA binding;cytoplasm;obsolete reproduction;nucleus;SOS response;embryo development ending in birth or egg hatching;nuclear speck;DNA-directed DNA pol…	K03511	ko05224;ko05222;ko05223;ko05220;ko05225;ko05226;ko05169;ko05210;ko05202;ko05216;ko05217;ko05214;ko05218;ko05200;ko03460;ko05212;ko05213	Breast cancer;Small cell lung cancer;Non-small cell lung cancer;Chronic myeloid leukemia;Hepatocellular carcinoma;Gastric cancer;Epstein-Barr virus infection;Colorectal cancer;Transcriptional misregulation in cancer;Thyroid cancer;Basal cell carcinoma;Glioma;Melanoma;Pathways in cancer;Fanconi anemia pathway;Pancreatic cancer;Endometrial cancer	DNA polymerase kappa isoform X4 [Homo sapiens]	PF00817.24	impB/mucB/samB family	DNA polymerase kappa OS=Homo sapiens OX=9606 GN=POLK PE=1 SV=1	4MV6J	L	IMS family HHH motif	COG0389	Nucleotidyltransferase/DNA polymerase DinP involved in DNA repair	L	Replication, recombination and repair	KOG2094	[L]	Replication, recombination and repair;	Predicted DNA damage inducible protein	-	row-206
transcript:ENST00000429494	transcript:ENST00000429494	0.630255	-10.4616	4.40845e-32	3.29998e-30	down	0	1.3958	0	198	GO:1901029;GO:0070062;GO:0016020;GO:0008284;GO:0005829;GO:0043231;GO:0005654;GO:0005739;GO:0005764;GO:0005765;GO:0022857;	BP;CC;CC;BP;CC;CC;CC;CC;CC;CC;MF;	negative regulation of mitochondrial outer membrane permeabilization involved in apoptotic signaling pathway;extracellular exosome;membrane;positive regulation of cell population proliferation;cytosol;intracellular membrane-bounded organelle;nucleoplasm;mitochondrion;lysosome;lysosomal membrane;transmembrane transporter activity;	-	-	-	solute carrier family 35 member F6 precursor [Rattus norvegicus]	-	-	Solute carrier family 35 member F6 OS=Rattus norvegicus OX=10116 GN=Slc35f6 PE=2 SV=1	4Q0XN	EG	negative regulation of mitochondrial outer membrane permeabilization involved in apoptotic signaling pathway	-	-	-	-	KOG3912	[R]	General function prediction only;	Predicted integral membrane protein	-	row-207
transcript:ENST00000388749	transcript:ENST00000388749	4.79272	-2.63045	7.37899e-32	5.49717e-30	down	10.655	64.9167	603	4793	GO:0070062;GO:0005681;GO:0021549;GO:0003730;GO:0005654;GO:0005730;GO:0035770;GO:0097157;GO:0045595;GO:0003677;GO:0043565;GO:0051148;GO:0010467;GO:0000932;GO:0033119;GO:0006376;GO:1990715;GO:0006397;GO:0048471;GO:0000381;GO:0075522;GO:0045665;GO:0045944;GO:0001069;GO:0010976;GO:0043025;GO:0007623;GO:0070886;GO:0045727;GO:0006396;GO:0008187;GO:0034198;GO:0003231;GO:0003697;GO:0005737;GO:0048025;GO:…	CC;CC;BP;MF;CC;CC;CC;MF;BP;MF;MF;BP;BP;CC;BP;BP;MF;BP;CC;BP;BP;BP;BP;MF;BP;CC;BP;BP;BP;BP;MF;BP;BP;MF;CC;BP;BP;MF;MF;MF;CC;BP;CC;CC;BP;CC;BP;CC;BP;BP;BP;BP;BP;BP;BP;CC;CC;BP;MF;BP;MF;BP;BP;CC;BP;BP;	extracellular exosome;spliceosomal complex;cerebellum development;mRNA 3'-UTR binding;nucleoplasm;nucleolus;ribonucleoprotein granule;pre-mRNA intronic binding;regulation of cell differentiation;DNA binding;sequence-specific DNA binding;negative regulation of muscle cell differentiation;gene expression;P-body;negative regulation of RNA splicing;mRNA splice site recognition;mRNA CDS binding;mRNA p…	K13159	-	-	heterogeneous nuclear ribonucleoprotein L isoform X5 [Homo sapiens]	PF11835.12	RRM-like domain	Heterogeneous nuclear ribonucleoprotein L OS=Rattus norvegicus OX=10116 GN=Hnrnpl PE=1 SV=2	4GHX0	A	Heterogeneous nuclear ribonucleoprotein L	-	-	-	-	KOG1456	[A]	RNA processing and modification;	Heterogeneous nuclear ribonucleoprotein L (contains RRM repeats)	-	row-208
transcript:ENST00000448246	transcript:ENST00000448246	0.542387	10.3216	8.11087e-32	6.01363e-30	up	1.12104	0	140	0	GO:0006357;GO:0008016;GO:0005829;GO:0005654;GO:0042802;GO:0046872;GO:0003677;GO:0000978;GO:0043565;GO:0003700;GO:0000785;GO:0000981;	BP;BP;CC;CC;MF;MF;MF;MF;MF;MF;CC;MF;	regulation of transcription by RNA polymerase II;regulation of heart contraction;cytosol;nucleoplasm;identical protein binding;metal ion binding;DNA binding;RNA polymerase II cis-regulatory region sequence-specific DNA binding;sequence-specific DNA binding;DNA-binding transcription factor activity;chromatin;DNA-binding transcription factor activity, RNA polymerase II-specific;	K09194	-	-	transcription factor Sp4 isoform X3 [Trichechus manatus latirostris]	-	-	Transcription factor Sp4 OS=Homo sapiens OX=9606 GN=SP4 PE=1 SV=2	48WK8	K	Transcription factor	-	-	-	-	-	-	-	-	-	row-209
gene:ENSG00000258643	BCL2L2-PABPN1	3.32952	-2.91108	9.62909e-32	7.10545e-30	down	3.12648	23.4903	124	1198	GO:0032868;GO:0000278;GO:0048599;GO:0040008;GO:0036466;GO:0031047;GO:0034284;GO:0006974;GO:0071839;GO:0030318;GO:0000184;GO:0010523;GO:0000398;GO:0016020;GO:0051721;GO:0043583;GO:0043065;GO:2000811;GO:0048538;GO:0010506;GO:0008637;GO:0050853;GO:0010494;GO:0014911;GO:0071347;GO:0048545;GO:0071333;GO:0033033;GO:0043565;GO:0030684;GO:1990646;GO:0043231;GO:0031966;GO:1990904;GO:0001836;GO:0071732;GO:…	BP;BP;BP;BP;BP;BP;BP;BP;BP;BP;BP;BP;BP;CC;MF;BP;BP;BP;BP;BP;BP;BP;CC;BP;BP;BP;BP;BP;MF;CC;BP;CC;CC;CC;BP;BP;BP;BP;BP;BP;BP;BP;BP;BP;BP;BP;BP;BP;BP;CC;CC;MF;MF;BP;MF;BP;BP;CC;BP;BP;BP;CC;BP;BP;CC;BP;BP;CC;BP;BP;BP;CC;BP;BP;BP;MF;BP;BP;MF;BP;MF;BP;BP;MF;BP;BP;MF;BP;BP;BP;BP;BP;BP;MF;BP;BP;MF;BP;MF;BP;BP;BP;BP;BP;BP;MF;BP;BP;CC;BP;BP;BP;CC;BP;CC;BP;CC;BP;BP;BP;BP;BP;BP;BP;BP;BP;BP;BP;BP;MF;BP;BP;BP;…	response to insulin;mitotic cell cycle;oocyte development;regulation of growth;synaptic vesicle recycling via endosome;regulatory ncRNA-mediated gene silencing;response to monosaccharide;DNA damage response;apoptotic process in bone marrow cell;melanocyte differentiation;nuclear-transcribed mRNA catabolic process, nonsense-mediated decay;negative regulation of calcium ion transport into cytosol;m…	K14396	ko03015;ko05164	mRNA surveillance pathway;Influenza A	BCL2L2-PABPN1 protein isoform 4 [Homo sapiens]	PF00452.23	Apoptosis regulator proteins, Bcl-2 family	Polyadenylate-binding protein 2 OS=Homo sapiens OX=9606 GN=PABPN1 PE=1 SV=3	4N2PM	A	intracellular signal transduction	COG0724	RNA recognition motif (RRM) domain	J	Translation, ribosomal structure and biogenesis	KOG4209	[A]	RNA processing and modification;	Splicing factor RNPS1, SR protein superfamily	-	row-210
gene:ENSG00000142089	IFITM3	5.88821	2.61328	1.43927e-31	1.05705e-29	up	144.153	23.1675	3376	708	GO:0098793;GO:0051607;GO:0007507;GO:0043679;GO:0043197;GO:0035456;GO:0005783;GO:0098839;GO:0017124;GO:0007166;GO:0005886;GO:0030282;GO:0042734;GO:0048471;GO:0043005;GO:0009952;GO:0008021;GO:0030672;GO:0006955;GO:0043231;GO:0030500;GO:0045177;GO:0017075;GO:0001756;GO:0030336;GO:0031901;GO:0005737;GO:0150037;GO:0050884;GO:0098978;GO:0005634;GO:0031982;GO:0001503;GO:0032897;GO:0016020;GO:0035455;GO:…	CC;BP;BP;CC;CC;BP;CC;CC;MF;BP;CC;BP;CC;CC;CC;BP;CC;CC;BP;CC;BP;CC;MF;BP;BP;CC;CC;BP;BP;CC;CC;CC;BP;BP;CC;BP;CC;BP;BP;BP;CC;BP;CC;BP;CC;BP;CC;BP;BP;CC;BP;BP;BP;CC;BP;BP;BP;	presynapse;defense response to virus;heart development;axon terminus;dendritic spine;response to interferon-beta;endoplasmic reticulum;postsynaptic density membrane;SH3 domain binding;cell surface receptor signaling pathway;plasma membrane;bone mineralization;presynaptic membrane;perinuclear region of cytoplasm;neuron projection;anterior/posterior pattern specification;synaptic vesicle;synaptic v…	K06566	-	-	interferon-induced transmembrane protein 3 [Pan paniscus]	PF04505.16	Interferon-induced transmembrane protein	Interferon-induced transmembrane protein 3 OS=Homo sapiens OX=9606 GN=IFITM3 PE=1 SV=2	4N73Z	S	Interferon-induced transmembrane protein	-	-	-	-	-	-	-	-	-	row-211
transcript:ENST00000422589	transcript:ENST00000422589	0.770118	-10.4247	2.01809e-31	1.4752e-29	down	0	1.90842	0	193	GO:0070062;GO:0005654;GO:0005743;GO:0005739;GO:0008270;GO:0009279;GO:0005794;GO:0102200;GO:1903999;GO:0070290;GO:0032052;GO:0043005;GO:0043025;GO:0009058;GO:0050729;GO:0043227;GO:0031901;GO:0005737;GO:0070291;GO:0001659;GO:0009395;GO:0001523;GO:0004620;GO:0042802;GO:0006644;GO:0070292;GO:0005769;GO:0016787;GO:0042622;GO:0005635;GO:0000139;GO:0090336;GO:0035900;GO:0048874;	CC;CC;CC;CC;MF;CC;CC;MF;BP;MF;MF;CC;CC;BP;BP;CC;CC;CC;BP;BP;BP;BP;MF;MF;BP;BP;CC;MF;CC;CC;CC;BP;BP;BP;	extracellular exosome;nucleoplasm;mitochondrial inner membrane;mitochondrion;zinc ion binding;cell outer membrane;Golgi apparatus;obsolete N-acetylphosphatidylethanolamine-hydrolysing phospholipase activity;negative regulation of eating behavior;N-acylphosphatidylethanolamine-specific phospholipase D activity;bile acid binding;neuron projection;neuronal cell body;biosynthetic process;positive reg…	K13985	ko04723	Retrograde endocannabinoid signaling	N-acyl-phosphatidylethanolamine-hydrolyzing phospholipase D isoform X1 [Gorilla gorilla gorilla]	PF12706.11	Beta-lactamase superfamily domain	N-acyl-phosphatidylethanolamine-hydrolyzing phospholipase D OS=Homo sapiens OX=9606 GN=NAPEPLD PE=1 SV=2	4N02H	S	N-acetylphosphatidylethanolamine-hydrolysing phospholipas activity	COG2220	L-ascorbate lactonase UlaG, metallo-beta-lactamase superfamily	G	Carbohydrate transport and metabolism	KOG3798	[R]	General function prediction only;	Predicted Zn-dependent hydrolase (beta-lactamase superfamily)	-	row-212
transcript:ENST00000437808	transcript:ENST00000437808	0.938992	5.35663	2.20682e-31	1.60562e-29	up	2.49567	0.051474	164	5	GO:0010821;GO:0004609;GO:0005829;GO:0016540;GO:0005743;GO:0005811;GO:0005739;GO:0035694;GO:0005794;GO:0006646;GO:0140042;GO:0005634;	BP;MF;CC;BP;CC;CC;CC;BP;CC;BP;BP;CC;	regulation of mitochondrion organization;phosphatidylserine decarboxylase activity;cytosol;protein autoprocessing;mitochondrial inner membrane;lipid droplet;mitochondrion;mitochondrial protein catabolic process;Golgi apparatus;phosphatidylethanolamine biosynthetic process;lipid droplet formation;nucleus;	K01613	ko01100;ko00564	Metabolic pathways;Glycerophospholipid metabolism	-	-	-	Phosphatidylserine decarboxylase proenzyme, mitochondrial OS=Pongo abelii OX=9601 GN=PISD PE=2 SV=1	4M8VD	I	Catalyzes the formation of phosphatidylethanolamine (PtdEtn) from phosphatidylserine (PtdSer). Plays a central role in phospholipid metabolism and in the interorganelle trafficking of phosphatidylserine	-	-	-	-	-	-	-	-	-	row-213
transcript:ENST00000523864	transcript:ENST00000523864	1.07378	3.40423	2.71018e-31	1.96268e-29	up	2.57794	0.238357	364	44	GO:0035024;GO:0005925;GO:0051497;GO:0032869;GO:0005811;GO:0035023;GO:0017166;GO:0005096;GO:0005783;GO:0030900;GO:0007049;GO:0003007;GO:0008289;GO:1900119;GO:0043542;GO:0045121;GO:0043274;GO:0097498;GO:0007165;GO:0051895;GO:0043231;GO:0031966;GO:0032587;GO:0006919;GO:0030336;GO:0090051;GO:0005737;GO:0008360;GO:0005634;GO:0007010;GO:0042169;GO:0035307;GO:0008285;GO:0030036;GO:0030864;GO:0001843;GO:…	BP;CC;BP;BP;CC;BP;MF;MF;CC;BP;BP;BP;MF;BP;BP;CC;MF;BP;BP;BP;CC;CC;CC;BP;BP;BP;CC;BP;CC;BP;MF;BP;BP;BP;CC;BP;BP;CC;BP;BP;CC;BP;BP;BP;	negative regulation of Rho protein signal transduction;focal adhesion;negative regulation of stress fiber assembly;cellular response to insulin stimulus;lipid droplet;regulation of Rho protein signal transduction;vinculin binding;GTPase activator activity;endoplasmic reticulum;forebrain development;cell cycle;heart morphogenesis;lipid binding;positive regulation of execution phase of apoptosis;en…	K20632	-	-	stAR-related lipid transfer protein 8 isoform X2 [Homo sapiens]	PF07647.21	SAM domain (Sterile alpha motif)	Rho GTPase-activating protein 7 OS=Homo sapiens OX=9606 GN=DLC1 PE=1 SV=4	4N0QD	T	StAR-related lipid transfer (START) domain containing 8	-	-	-	-	KOG2200	[T]	Signal transduction mechanisms;	Tumour suppressor protein p122-RhoGAP/DLC1	-	row-214
transcript:ENST00000411482	transcript:ENST00000411482	1.00785	10.2692	4.33762e-31	3.1267e-29	up	3.04377	0	135	0	-	-	-	-	-	-	-	-	-	-	-	-	-	-	-	-	-	-	-	-	-	-	row-215
transcript:ENST00000434658	transcript:ENST00000434658	1.50257	-4.00735	5.86813e-31	4.21045e-29	down	0.308999	5.13335	17	353	GO:0005576;GO:0005615;GO:0019732;GO:0061844;GO:0030246;GO:1905035;	CC;CC;BP;BP;MF;BP;	extracellular region;extracellular space;antifungal humoral response;antimicrobial humoral immune response mediated by antimicrobial peptide;carbohydrate binding;negative regulation of antifungal innate immune response;	-	-	-	protein FAM3A isoform X3 [Nomascus leucogenys]	-	-	Protein FAM3A OS=Pongo abelii OX=9601 GN=FAM3A PE=2 SV=1	4M67G	S	Family with sequence similarity 3, member A	-	-	-	-	-	-	-	-	-	row-216
gene:ENSG00000130513	GDF15	3.03161	2.95224	6.15051e-31	4.39282e-29	up	18.8518	2.36829	652	108	GO:0008083;GO:1902462;GO:0030949;GO:0060272;GO:0042670;GO:0045747;GO:0035116;GO:0040008;GO:0051145;GO:0030858;GO:0045887;GO:0048286;GO:0035156;GO:0061047;GO:0045596;GO:0003331;GO:0048514;GO:0045839;GO:0048598;GO:0005114;GO:0036099;GO:0030424;GO:0060235;GO:1900745;GO:0007443;GO:0098898;GO:1903701;GO:0008347;GO:0003279;GO:0043583;GO:0043065;GO:1905770;GO:0051794;GO:0005768;GO:0060391;GO:0019904;GO:…	MF;BP;BP;BP;BP;BP;BP;BP;BP;BP;BP;BP;BP;BP;BP;BP;BP;BP;BP;MF;BP;CC;BP;BP;BP;CC;BP;BP;BP;BP;BP;BP;BP;CC;BP;MF;BP;BP;BP;BP;BP;BP;BP;BP;BP;BP;BP;BP;BP;BP;BP;BP;BP;BP;BP;BP;CC;BP;BP;BP;BP;BP;BP;BP;BP;BP;BP;BP;BP;CC;BP;BP;BP;BP;BP;BP;BP;BP;BP;BP;BP;BP;BP;CC;BP;BP;BP;BP;BP;BP;BP;BP;CC;BP;BP;MF;CC;BP;BP;BP;BP;BP;BP;BP;BP;CC;BP;BP;BP;BP;BP;BP;BP;BP;BP;BP;BP;BP;BP;BP;BP;BP;BP;BP;BP;BP;BP;BP;MF;BP;BP;BP;BP;…	growth factor activity;positive regulation of mesenchymal stem cell proliferation;positive regulation of vascular endothelial growth factor receptor signaling pathway;embryonic skeletal joint morphogenesis;retinal cone cell differentiation;positive regulation of Notch signaling pathway;embryonic hindlimb morphogenesis;regulation of growth;smooth muscle cell differentiation;positive regulation of …	K05504	ko04060	Cytokine-cytokine receptor interaction	growth/differentiation factor 15 preproprotein [Homo sapiens]	PF00019.24	Transforming growth factor beta like domain	Growth/differentiation factor 15 OS=Homo sapiens OX=9606 GN=GDF15 PE=1 SV=3	4N5EH	T	Transforming growth factor-beta (TGF-beta) family	-	-	-	-	KOG3900	[T]	Signal transduction mechanisms;	Transforming growth factor beta, bone morphogenetic protein and related proteins	-	row-217
transcript:ENST00000533518	transcript:ENST00000533518	0.786167	-10.2999	7.06319e-31	5.02164e-29	down	0	1.97385	0	177	GO:0060348;GO:0006805;GO:0047058;GO:0050820;GO:0042373;GO:0047057;GO:0014070;GO:0010243;GO:0017187;GO:0042371;GO:0034599;GO:0005783;GO:0048038;GO:0005789;GO:0030193;GO:0007596;	BP;BP;MF;BP;BP;MF;BP;BP;BP;BP;BP;CC;MF;CC;BP;BP;	bone development;xenobiotic metabolic process;vitamin-K-epoxide reductase (warfarin-insensitive) activity;positive regulation of coagulation;vitamin K metabolic process;vitamin-K-epoxide reductase (warfarin-sensitive) activity;response to organic cyclic compound;obsolete response to organonitrogen compound;peptidyl-glutamic acid carboxylation;vitamin K biosynthetic process;cellular response to ox…	K05357	ko00130;ko01100	Ubiquinone and other terpenoid-quinone biosynthesis;Metabolic pathways	vitamin K epoxide reductase complex subunit 1 isoform X1 [Pan paniscus]	PF07884.18	Vitamin K epoxide reductase family	Vitamin K epoxide reductase complex subunit 1 OS=Homo sapiens OX=9606 GN=VKORC1 PE=1 SV=1	4MTTH	S	Vitamin K epoxide reductase complex subunit 1	-	-	-	-	-	-	-	-	-	row-218
transcript:ENST00000576272	transcript:ENST00000576272	2.22836	-3.9497	7.70706e-31	5.4545e-29	down	0.728635	11.7029	18	359	GO:0016020;GO:0006457;GO:0009312;GO:0006488;GO:0005789;	CC;BP;BP;BP;CC;	membrane;protein folding;oligosaccharide biosynthetic process;dolichol-linked oligosaccharide biosynthetic process;endoplasmic reticulum membrane;	K09660	-	-	mannose-P-dolichol utilization defect 1 protein isoform X8 [Chlorocebus sabaeus]	-	-	Mannose-P-dolichol utilization defect 1 protein OS=Homo sapiens OX=9606 GN=MPDU1 PE=1 SV=2	4M74P	S	PQ loop repeat	-	-	-	-	KOG3211	[R]	General function prediction only;	Predicted endoplasmic reticulum membrane protein Lec35/MPDU1 involved in monosaccharide-P-dolichol utilization	-	row-219
transcript:ENST00000452281	transcript:ENST00000452281	0.736673	10.2585	8.55089e-31	5.99718e-29	up	1.77665	0	134	0	GO:0006357;GO:0032757;GO:0050804;GO:1902895;GO:0050798;GO:0032869;GO:0002931;GO:0042098;GO:1990841;GO:0001779;GO:0033209;GO:0034240;GO:0045747;GO:0016922;GO:0006953;GO:1902728;GO:0001228;GO:0040014;GO:0060396;GO:0032733;GO:0045296;GO:0099527;GO:0001707;GO:0097531;GO:0045944;GO:0060019;GO:0019899;GO:0038113;GO:0019915;GO:2001171;GO:0042448;GO:0035591;GO:0070670;GO:0003340;GO:0001223;GO:0050729;GO:…	BP;BP;BP;BP;BP;BP;BP;BP;MF;BP;BP;BP;BP;MF;BP;BP;MF;BP;BP;BP;MF;BP;BP;BP;BP;BP;MF;BP;BP;BP;BP;MF;BP;BP;MF;BP;MF;BP;BP;BP;BP;MF;BP;BP;CC;MF;BP;BP;MF;MF;BP;MF;BP;BP;BP;BP;CC;BP;BP;BP;CC;MF;BP;MF;MF;MF;BP;BP;BP;BP;BP;BP;BP;BP;BP;BP;BP;CC;BP;BP;BP;BP;BP;BP;BP;CC;BP;BP;BP;BP;BP;MF;BP;CC;BP;BP;MF;BP;BP;BP;BP;BP;BP;BP;BP;MF;BP;BP;BP;BP;CC;BP;BP;BP;BP;BP;MF;CC;BP;BP;BP;BP;BP;BP;BP;BP;BP;BP;MF;CC;MF;BP;MF;…	regulation of transcription by RNA polymerase II;positive regulation of interleukin-8 production;modulation of chemical synaptic transmission;positive regulation of miRNA transcription;activated T cell proliferation;cellular response to insulin stimulus;response to ischemia;T cell proliferation;promoter-specific chromatin binding;natural killer cell differentiation;tumor necrosis factor-mediated …	K11220	ko04933;ko05235;ko05212;ko05161;ko05200;ko05160;ko05165;ko04062;ko05167;ko04658;ko05169;ko05162;ko04630;ko05152;ko04621;ko04625;ko04620;ko04917;ko05321;ko04919;ko04217;ko04380;ko05164;ko05168;ko04659;ko05145;ko05140	AGE-RAGE signaling pathway in diabetic complications;PD-L1 expression and PD-1 checkpoint pathway in cancer;Pancreatic cancer;Hepatitis B;Pathways in cancer;Hepatitis C;Human papillomavirus infection;Chemokine signaling pathway;Kaposi sarcoma-associated herpesvirus infection;Th1 and Th2 cell differentiation;Epstein-Barr virus infection;Measles;JAK-STAT signaling pathway;Tuberculosis;NOD-like rece…	signal transducer and activator of transcription 1-alpha/beta isoform 6 [Homo sapiens]	PF02865.21	STAT protein, protein interaction domain	Signal transducer and activator of transcription 1-alpha/beta OS=Homo sapiens OX=9606 GN=STAT1 PE=1 SV=2	4J7SC	K	Signal transducer and activator of transcription	-	-	-	-	KOG3667	[KT]	Transcription; Signal transduction mechanisms;	STAT protein	-	row-220
transcript:ENST00000345114	transcript:ENST00000345114	0.659188	10.2585	8.55089e-31	5.99718e-29	up	1.49385	0	134	0	GO:0006357;GO:0006110;GO:0001216;GO:0033137;GO:0005654;GO:0005667;GO:0035538;GO:0006913;GO:0005739;GO:0045893;GO:0071333;GO:0003677;GO:0000432;GO:0043565;GO:0001228;GO:0045944;GO:0045821;GO:0033552;GO:0140297;GO:0005737;GO:0046889;GO:0006355;GO:0003700;GO:0061629;GO:0001227;GO:0005634;GO:0055089;GO:0090324;GO:0042593;GO:0005741;GO:0000981;GO:0010255;GO:0046982;GO:0031667;GO:0000122;GO:0008340;GO:…	BP;BP;MF;BP;CC;CC;MF;BP;CC;BP;BP;MF;BP;MF;MF;BP;BP;BP;MF;CC;BP;BP;MF;MF;MF;CC;BP;BP;BP;CC;MF;BP;MF;BP;BP;BP;MF;CC;CC;BP;MF;BP;BP;CC;MF;BP;BP;BP;BP;BP;MF;BP;	regulation of transcription by RNA polymerase II;regulation of glycolytic process;DNA-binding transcription activator activity;negative regulation of peptidyl-serine phosphorylation;nucleoplasm;transcription regulator complex;carbohydrate response element binding;nucleocytoplasmic transport;mitochondrion;positive regulation of DNA-templated transcription;cellular response to glucose stimulus;DNA …	K09113	ko04931;ko04932	Insulin resistance;Non-alcoholic fatty liver disease	carbohydrate-responsive element-binding protein isoform X5 [Homo sapiens]	-	-	Carbohydrate-responsive element-binding protein OS=Homo sapiens OX=9606 GN=MLXIPL PE=1 SV=1	4MV0W	K	helix loop helix domain	-	-	-	-	KOG3582	[K]	Transcription;	Mlx interactors and related transcription factors	-	row-221
transcript:ENST00000531975	transcript:ENST00000531975	1.4672	-10.2918	9.76718e-31	6.81951e-29	down	0	6.64442	0	176	-	-	-	-	-	-	-	-	-	-	-	-	-	-	-	-	-	-	-	-	-	-	row-222
transcript:ENST00000564415	transcript:ENST00000564415	0.931638	-4.67641	1.16523e-30	8.09936e-29	down	0.090184	2.33735	8	266	GO:0048213;GO:0032588;GO:0006029;GO:0070085;GO:0005829;GO:0007030;GO:0000139;GO:0015031;GO:0006890;GO:0042802;GO:0001501;GO:0017119;GO:0000301;	BP;CC;BP;BP;CC;BP;CC;BP;BP;MF;BP;CC;BP;	obsolete Golgi vesicle prefusion complex stabilization;trans-Golgi network membrane;proteoglycan metabolic process;glycosylation;cytosol;Golgi organization;Golgi membrane;protein transport;retrograde vesicle-mediated transport, Golgi to endoplasmic reticulum;identical protein binding;skeletal system development;Golgi transport complex;retrograde transport, vesicle recycling within Golgi;	K20291	-	-	conserved oligomeric Golgi complex subunit 4 isoform 1 [Homo sapiens]	PF20663.1	Conserved oligomeric Golgi complex subunit 4, N-terminal	Conserved oligomeric Golgi complex subunit 4 OS=Homo sapiens OX=9606 GN=COG4 PE=1 SV=3	4N2PN	U	protein transport	-	-	-	-	KOG0412	[U]	Intracellular trafficking, secretion, and vesicular transport;	Golgi transport complex COD1 protein	-	row-223
transcript:ENST00000429716	transcript:ENST00000429716	0.968082	10.2477	1.20269e-30	8.32259e-29	up	2.82687	0	133	0	GO:0070062;GO:0030425;GO:0098793;GO:0045211;GO:0045773;GO:0048812;GO:0098973;GO:0005938;GO:0005886;GO:0045296;GO:0030665;GO:0061003;GO:1904813;GO:0098974;GO:0043231;GO:0002102;GO:0034774;GO:0005737;GO:0002250;GO:1904724;GO:0098978;GO:0071800;GO:0043204;GO:0007416;GO:0070161;GO:0098794;GO:0005576;GO:0016020;GO:0014069;GO:0030833;GO:0003779;GO:0061024;GO:0005769;GO:0006897;GO:0030864;GO:0030027;GO:…	CC;CC;CC;CC;BP;BP;MF;CC;CC;MF;CC;BP;CC;BP;CC;CC;CC;CC;BP;CC;CC;BP;CC;BP;CC;CC;CC;CC;CC;BP;MF;BP;CC;BP;CC;CC;CC;CC;CC;BP;MF;CC;MF;MF;	extracellular exosome;dendrite;presynapse;postsynaptic membrane;positive regulation of axon extension;neuron projection morphogenesis;structural constituent of postsynaptic actin cytoskeleton;cell cortex;plasma membrane;cadherin binding;clathrin-coated vesicle membrane;positive regulation of dendritic spine morphogenesis;ficolin-1-rich granule lumen;postsynaptic actin cytoskeleton organization;in…	K20520	-	-	drebrin-like protein isoform X4 [Gorilla gorilla gorilla]	PF00241.24	Cofilin/tropomyosin-type actin-binding protein	Drebrin-like protein OS=Homo sapiens OX=9606 GN=DBNL PE=1 SV=1	4MGTQ	Z	Drebrin-like	-	-	-	-	KOG3655	[Z]	Cytoskeleton;	Drebrins and related actin binding proteins	-	row-224
transcript:ENST00000591715	transcript:ENST00000591715	1.18768	-10.2753	1.87363e-30	1.29081e-28	down	0	4.18865	0	174	GO:1990498;GO:0005829;GO:0070652;GO:0051225;GO:0000922;GO:0010968;GO:0005813;GO:0051301;GO:0007098;	CC;CC;CC;BP;CC;BP;CC;BP;BP;	mitotic spindle microtubule;cytosol;HAUS complex;spindle assembly;spindle pole;regulation of microtubule nucleation;centrosome;cell division;centrosome cycle;	K16584	-	-	PREDICTED: HAUS augmin-like complex subunit 1 isoform X1 [Odobenus rosmarus divergens]	-	-	HAUS augmin-like complex subunit 1 OS=Homo sapiens OX=9606 GN=HAUS1 PE=1 SV=1	491N7	S	HAUS augmin-like complex subunit 1	-	-	-	-	-	-	-	-	-	row-225
transcript:ENST00000530726	transcript:ENST00000530726	4.54235	-2.6126	2.34774e-30	1.61032e-28	down	8.92434	53.7096	364	2858	GO:0014002;GO:0005788;GO:0042098;GO:0031623;GO:0072659;GO:0045747;GO:1905521;GO:0040008;GO:0110135;GO:0007166;GO:0045944;GO:0007599;GO:0044877;GO:0019899;GO:0005912;GO:0042130;GO:0014905;GO:0031982;GO:1900746;GO:0009897;GO:0050871;GO:0016020;GO:0009986;GO:0005604;GO:0030511;GO:0031092;GO:0042661;GO:0008347;GO:0070863;GO:0098953;GO:0030335;GO:0001618;GO:0005764;GO:0065003;GO:1901379;GO:0043410;GO:…	BP;CC;BP;BP;BP;BP;BP;BP;BP;BP;BP;BP;MF;MF;CC;BP;BP;CC;BP;CC;BP;CC;CC;CC;BP;CC;BP;BP;BP;BP;BP;MF;CC;BP;BP;BP;CC;CC;BP;BP;BP;BP;BP;BP;CC;BP;BP;BP;CC;CC;BP;BP;CC;BP;CC;BP;BP;CC;CC;CC;BP;CC;CC;BP;CC;BP;BP;MF;CC;BP;CC;CC;BP;CC;BP;CC;BP;CC;BP;BP;BP;CC;BP;BP;BP;BP;BP;CC;BP;CC;BP;BP;BP;BP;BP;MF;BP;BP;CC;BP;CC;CC;CC;BP;MF;BP;BP;CC;BP;BP;BP;BP;CC;BP;BP;BP;MF;BP;BP;CC;CC;BP;BP;BP;CC;BP;CC;MF;BP;BP;MF;CC;BP;…	astrocyte development;endoplasmic reticulum lumen;T cell proliferation;receptor internalization;protein localization to plasma membrane;positive regulation of Notch signaling pathway;regulation of macrophage migration;regulation of growth;Norrin signaling pathway;cell surface receptor signaling pathway;positive regulation of transcription by RNA polymerase II;hemostasis;protein-containing complex…	K06537	-	-	CD151 antigen isoform X1 [Homo sapiens]	PF00335.24	Tetraspanin family	CD151 antigen OS=Homo sapiens OX=9606 GN=CD151 PE=1 SV=3	4MXK3	S	CD151 molecule (Raph blood group)	-	-	-	-	KOG3882	[R]	General function prediction only;	Tetraspanin family integral membrane protein	-	row-226
MSTRG.7125.2	MSTRG.7125.2	0.404084	10.2258	2.38767e-30	1.63053e-28	up	0.750986	0	131	0	GO:0005911;GO:0005930;GO:0001736;GO:0034620;GO:0005634;GO:0048487;GO:0006468;GO:0031072;GO:0051087;GO:0008104;GO:0035115;GO:0051301;GO:0031870;GO:1990837;GO:0043584;GO:0000981;GO:0035116;GO:0005879;GO:0016020;GO:0007286;GO:0000785;GO:0002177;GO:0031982;GO:0005923;GO:0005829;GO:0003779;GO:0090102;GO:0043014;GO:0097225;GO:0001664;GO:0031625;GO:0001701;GO:0021532;GO:0044297;GO:0035253;GO:0022038;GO:…	CC;CC;BP;BP;CC;MF;BP;MF;MF;BP;BP;BP;MF;MF;BP;MF;BP;CC;CC;BP;CC;CC;CC;CC;CC;MF;BP;MF;CC;MF;MF;BP;BP;CC;CC;BP;MF;BP;BP;BP;CC;BP;BP;BP;BP;BP;BP;BP;CC;BP;CC;MF;CC;BP;MF;CC;CC;MF;CC;BP;CC;BP;CC;CC;BP;MF;MF;BP;BP;MF;	cell-cell junction;axoneme;establishment of planar polarity;cellular response to unfolded protein;nucleus;beta-tubulin binding;protein phosphorylation;heat shock protein binding;protein-folding chaperone binding;protein localization;embryonic forelimb morphogenesis;cell division;thromboxane A2 receptor binding;sequence-specific double-stranded DNA binding;nose development;DNA-binding transcriptio…	-	hsa04137;hsa04140	Mitophagy - animal;Autophagy - animal	zinc finger protein ENSP00000375192-like, partial [Gorilla gorilla gorilla]	-	-	Uncharacterized protein C9orf85 OS=Homo sapiens OX=9606 GN=C9orf85 PE=1 SV=1	48MGH	-	-	-	-	-	-	-	-	-	-	-	row-227
transcript:ENST00000620309	transcript:ENST00000620309	1.60389	-10.267	2.59918e-30	1.76721e-28	down	0	8.23927	0	173	GO:0070062;GO:0005654;GO:0005739;GO:0010498;GO:0002376;GO:0043161;GO:0010499;GO:0005737;GO:0019774;GO:0005634;GO:0000502;GO:0005839;GO:0004175;GO:0006511;GO:0030163;GO:0099503;GO:0061133;GO:0004298;GO:0005829;GO:0000325;	CC;CC;CC;BP;BP;BP;BP;CC;CC;CC;CC;CC;MF;BP;BP;CC;MF;MF;CC;CC;	extracellular exosome;nucleoplasm;mitochondrion;proteasomal protein catabolic process;immune system process;proteasome-mediated ubiquitin-dependent protein catabolic process;proteasomal ubiquitin-independent protein catabolic process;cytoplasm;proteasome core complex, beta-subunit complex;nucleus;proteasome complex;proteasome core complex;endopeptidase activity;ubiquitin-dependent protein catabol…	K02735	ko03050	Proteasome	PREDICTED: proteasome subunit beta type-3 [Colobus angolensis palliatus]	PF00227.30	Proteasome subunit	Proteasome subunit beta type-3 OS=Mus musculus OX=10090 GN=Psmb3 PE=1 SV=1	4K28G	O	Proteasome (prosome, macropain) subunit, beta type, 3	COG0638	20S proteasome, alpha and beta subunits	O	Posttranslational modification, protein turnover, chaperones	KOG0180	[O]	Posttranslational modification, protein turnover, chaperones;	20S proteasome, regulatory subunit beta type PSMB3/PUP3	-	row-228
transcript:ENST00000483364	transcript:ENST00000483364	0.761085	10.2037	4.76291e-30	3.22428e-28	up	1.87223	0	129	0	GO:0070062;GO:0008083;GO:0035188;GO:0006508;GO:0070001;GO:2000360;GO:0060465;GO:0005125;GO:0001764;GO:0007313;GO:0008270;GO:0001501;GO:0007411;GO:0005794;GO:0048632;GO:0030246;GO:0036342;GO:0005938;GO:0038004;GO:0001707;GO:0048264;GO:0008045;GO:0005886;GO:0043050;GO:0001568;GO:0048471;GO:0061036;GO:0016477;GO:0062023;GO:0005615;GO:0040002;GO:0070002;GO:0042588;GO:0006954;GO:0035162;GO:0070573;GO:…	CC;MF;BP;BP;MF;BP;BP;MF;BP;BP;MF;BP;BP;CC;BP;MF;BP;CC;BP;BP;BP;BP;CC;BP;BP;CC;BP;BP;CC;CC;BP;MF;CC;BP;BP;MF;MF;BP;BP;MF;BP;CC;MF;BP;CC;BP;CC;BP;BP;BP;CC;BP;CC;CC;CC;MF;MF;BP;BP;MF;BP;BP;MF;MF;BP;BP;CC;BP;BP;MF;BP;BP;BP;CC;BP;BP;BP;BP;	extracellular exosome;growth factor activity;hatching;proteolysis;aspartic-type peptidase activity;negative regulation of binding of sperm to zona pellucida;pharynx development;cytokine activity;neuron migration;maternal specification of dorsal/ventral axis, oocyte, soma encoded;zinc ion binding;skeletal system development;axon guidance;Golgi apparatus;negative regulation of skeletal muscle tissu…	K05502	-	-	bone morphogenetic protein 1 isoform 1 precursor [Homo sapiens]	PF01400.28	Astacin (Peptidase family M12A)	Bone morphogenetic protein 1 OS=Homo sapiens OX=9606 GN=BMP1 PE=1 SV=2	4N8GT	O	Coagulation Factor Xa inhibitory site	COG5549	Predicted Zn-dependent protease	O	Posttranslational modification, protein turnover, chaperones	KOG3714	[O]	Posttranslational modification, protein turnover, chaperones;	Meprin A metalloprotease	-	row-229
transcript:ENST00000374156	transcript:ENST00000374156	2.1595	-3.08255	5.06106e-30	3.41129e-28	down	1.04546	8.75798	63	686	GO:0016020;	CC;	membrane;	-	-	-	transmembrane protein 273 isoform X7 [Macaca thibetana thibetana]	PF14986.10	Domain of unknown function (DUF4514)	Transmembrane protein 273 OS=Homo sapiens OX=9606 GN=TMEM273 PE=3 SV=1	4MKA9	S	Chromosome 10 open reading frame 128	-	-	-	-	-	-	-	-	-	row-230
transcript:ENST00000464224	transcript:ENST00000464224	0.968197	4.13394	6.31336e-30	4.23703e-28	up	2.38969	0.129152	207	15	GO:0007288;GO:0005525;GO:0007338;GO:0120293;GO:0005829;GO:0005737;GO:0005813;GO:0070286;GO:0016787;GO:0101031;	BP;MF;BP;CC;CC;CC;CC;BP;MF;CC;	sperm axoneme assembly;GTP binding;single fertilization;dynein axonemal particle;cytosol;cytoplasm;centrosome;axonemal dynein complex assembly;hydrolase activity;protein folding chaperone complex;	K24652	-	-	tetratricopeptide repeat protein 12 isoform X4 [Pan paniscus]	PF20669.1	Exocyst complex component Exo70 N-terminal	Tetratricopeptide repeat protein 12 OS=Homo sapiens OX=9606 GN=TTC12 PE=1 SV=2	4MW6V	O	Tetratricopeptide repeat domain	-	-	-	-	KOG0548	[O]	Posttranslational modification, protein turnover, chaperones;	Molecular co-chaperone STI1	-	row-231
transcript:ENST00000400769	transcript:ENST00000400769	0.776152	10.1924	6.73922e-30	4.50342e-28	up	1.93285	0	128	0	GO:0009274;GO:0051990;GO:0004458;GO:0005743;GO:0005777;GO:0005739;GO:0050660;GO:0008270;GO:0046872;GO:0006091;GO:0019154;GO:0006754;GO:0003973;GO:0005886;GO:0009853;GO:0005759;GO:0006974;GO:0019538;GO:0030447;GO:0047809;GO:0031966;GO:0010043;GO:0046296;GO:0006807;GO:0005737;GO:0010230;GO:0009339;GO:0051596;GO:0008609;GO:0006108;GO:0016491;GO:0008152;GO:0005524;GO:0003779;GO:0042802;GO:0019249;GO:…	CC;MF;MF;CC;CC;CC;MF;MF;MF;BP;MF;BP;MF;CC;BP;CC;BP;BP;BP;MF;CC;BP;BP;BP;CC;BP;CC;BP;MF;BP;MF;BP;MF;MF;MF;BP;BP;BP;BP;MF;MF;MF;MF;CC;BP;MF;BP;	peptidoglycan-based cell wall;(R)-2-hydroxyglutarate dehydrogenase activity;D-lactate dehydrogenase (cytochrome) activity;mitochondrial inner membrane;peroxisome;mitochondrion;flavin adenine dinucleotide binding;zinc ion binding;metal ion binding;generation of precursor metabolites and energy;glycolate dehydrogenase activity;ATP biosynthetic process;(S)-2-hydroxy-acid oxidase activity;plasma memb…	K18204	-	-	D-2-hydroxyglutarate dehydrogenase, mitochondrial isoform 1 precursor [Homo sapiens]	PF01565.27	FAD binding domain	D-2-hydroxyglutarate dehydrogenase, mitochondrial OS=Homo sapiens OX=9606 GN=D2HGDH PE=1 SV=3	4N5XR	C	FAD linked oxidases, C-terminal domain	COG0277	FAD/FMN-containing lactate dehydrogenase/glycolate oxidase	C	Energy production and conversion	KOG1232	[C]	Energy production and conversion;	Proteins containing the FAD binding domain	-	row-232
transcript:ENST00000532881	transcript:ENST00000532881	1.68817	-3.27008	7.24921e-30	4.82351e-28	down	0.57877	5.57753	44	546	GO:0046329;GO:0007409;GO:0000165;GO:0032526;GO:0030587;GO:0000278;GO:0009651;GO:0048599;GO:0048273;GO:0062026;GO:0035556;GO:0019838;GO:0035160;GO:0010225;GO:0030336;GO:0010193;GO:0010033;GO:0008138;GO:0061629;GO:0005078;GO:0005634;GO:0002710;GO:0001691;GO:1990439;GO:0009792;GO:0042593;GO:0120277;GO:0009734;GO:0031435;GO:0000122;GO:0042692;GO:0030036;GO:0030295;GO:0046677;GO:0050860;GO:2000463;GO:…	BP;BP;BP;BP;BP;BP;BP;BP;MF;BP;BP;MF;BP;BP;BP;BP;BP;MF;MF;MF;CC;BP;MF;MF;BP;BP;BP;BP;MF;BP;BP;BP;MF;BP;BP;BP;CC;BP;BP;BP;BP;BP;BP;BP;MF;BP;BP;BP;CC;BP;BP;CC;CC;CC;BP;MF;CC;BP;MF;CC;BP;MF;BP;BP;BP;BP;BP;BP;BP;BP;BP;MF;BP;CC;BP;BP;BP;BP;BP;BP;MF;BP;BP;BP;BP;MF;CC;CC;BP;CC;MF;BP;MF;CC;BP;MF;BP;CC;BP;BP;BP;BP;BP;BP;CC;CC;BP;BP;BP;CC;BP;MF;CC;BP;CC;BP;BP;BP;BP;BP;BP;CC;BP;CC;BP;BP;BP;MF;BP;BP;MF;BP;CC;…	negative regulation of JNK cascade;axonogenesis;MAPK cascade;response to retinoic acid;sorocarp development;mitotic cell cycle;response to salt stress;oocyte development;mitogen-activated protein kinase p38 binding;negative regulation of SCF-dependent proteasomal ubiquitin-dependent catabolic process;intracellular signal transduction;growth factor binding;maintenance of epithelial integrity, open…	K05766	ko04360;ko04810	Axon guidance;Regulation of actin cytoskeleton	protein phosphatase Slingshot homolog 3 isoform X1 [Homo sapiens]	PF00782.24	Dual specificity phosphatase, catalytic domain	Protein phosphatase Slingshot homolog 3 OS=Homo sapiens OX=9606 GN=SSH3 PE=1 SV=2	4MY3J	V	DEK C terminal domain	COG2453	Protein-tyrosine phosphatase	T	Signal transduction mechanisms	-	-	-	-	-	row-233
transcript:ENST00000448002	transcript:ENST00000448002	0.921926	-5.15185	7.83851e-30	5.19343e-28	down	0.060988	2.38333	5	233	GO:0006357;GO:0006508;GO:0036312;GO:0021592;GO:0000278;GO:0051781;GO:0021670;GO:0010225;GO:0019903;GO:2000746;GO:0019005;GO:0005634;GO:0009734;GO:2000178;GO:0016020;GO:0030424;GO:0000122;GO:0021993;GO:0031146;GO:0006289;GO:0071365;GO:1900226;GO:0009953;GO:1990756;GO:1905393;GO:0050727;GO:0005758;GO:0010506;GO:0000151;GO:0098685;GO:0007399;GO:0005654;GO:0044830;GO:0008270;GO:0032452;GO:0051864;GO:…	BP;BP;MF;BP;BP;BP;BP;BP;MF;BP;CC;CC;BP;BP;CC;CC;BP;BP;BP;BP;BP;BP;BP;MF;BP;BP;CC;BP;CC;CC;BP;CC;BP;MF;MF;MF;BP;MF;CC;CC;BP;CC;BP;BP;MF;CC;BP;BP;CC;BP;BP;BP;CC;CC;CC;BP;BP;BP;CC;BP;BP;CC;BP;CC;BP;MF;BP;BP;BP;BP;BP;CC;BP;BP;BP;BP;MF;MF;MF;BP;CC;MF;BP;BP;MF;BP;CC;BP;BP;BP;BP;BP;BP;BP;	regulation of transcription by RNA polymerase II;proteolysis;phosphatidylinositol 3-kinase regulatory subunit binding;fourth ventricle development;mitotic cell cycle;positive regulation of cell division;lateral ventricle development;response to UV-C;protein phosphatase binding;regulation of defecation rhythm;SCF ubiquitin ligase complex;nucleus;auxin-activated signaling pathway;negative regulatio…	K10279	-	-	dynein regulatory complex subunit 6 isoform X4 [Nomascus leucogenys]	PF13516.10	Leucine Rich repeat	F-box and leucine-rich repeat protein 13 OS=Homo sapiens OX=9606 GN=FBXL13 PE=2 SV=3	4MYIV	S	F-box and leucine-rich repeat protein 13	-	-	-	-	KOG1947	[R]	General function prediction only;	Leucine rich repeat proteins, some proteins contain F-box	-	row-234
transcript:ENST00000495659	transcript:ENST00000495659	0.835837	7.14887	9.54723e-30	6.27217e-28	up	2.18419	0.000519	126	1	GO:0016020;GO:0005615;GO:1904491;GO:0005829;GO:0001841;GO:0060271;GO:0008589;GO:0021904;GO:0021523;GO:0001701;GO:0021956;GO:0036038;GO:0021537;GO:0005856;	CC;CC;BP;CC;BP;BP;BP;BP;BP;BP;BP;CC;BP;CC;	membrane;extracellular space;protein localization to ciliary transition zone;cytosol;neural tube formation;cilium assembly;regulation of smoothened signaling pathway;dorsal/ventral neural tube patterning;somatic motor neuron differentiation;in utero embryonic development;central nervous system interneuron axonogenesis;MKS complex;telencephalon development;cytoskeleton;	K19382	-	-	tectonic-1 isoform X2 [Homo sapiens]	-	-	Tectonic-1 OS=Homo sapiens OX=9606 GN=TCTN1 PE=2 SV=2	4N51G	W	Tectonic family member 1	-	-	-	-	-	-	-	-	-	row-235
transcript:ENST00000558357	transcript:ENST00000558357	0.42231	10.1811	9.54723e-30	6.27217e-28	up	0.795791	0	127	0	GO:0006357;GO:0000182;GO:0140750;GO:0140751;GO:0003714;GO:0035116;GO:2000022;GO:0045663;GO:0006974;GO:0001223;GO:0045596;GO:0043596;GO:0016020;GO:0035973;GO:0016590;GO:0010424;GO:0006352;GO:1902275;GO:0006337;GO:0010467;GO:0007399;GO:0045893;GO:0060976;GO:0043231;GO:0090536;GO:0045740;GO:0000792;GO:0001410;GO:0003779;GO:0042148;GO:0000978;GO:0033696;GO:0000729;GO:0030957;GO:0035092;GO:0030198;GO:…	BP;MF;MF;MF;MF;BP;BP;BP;BP;MF;BP;CC;CC;BP;CC;BP;BP;BP;BP;BP;BP;BP;BP;CC;CC;BP;CC;BP;MF;BP;MF;BP;BP;MF;BP;BP;BP;MF;BP;BP;BP;CC;BP;CC;BP;MF;BP;BP;CC;BP;BP;BP;BP;BP;BP;CC;BP;BP;BP;CC;BP;BP;BP;CC;BP;BP;MF;MF;BP;BP;BP;MF;BP;BP;BP;CC;BP;BP;BP;BP;MF;BP;BP;BP;BP;MF;BP;CC;CC;BP;BP;MF;BP;BP;BP;MF;BP;CC;BP;BP;BP;BP;BP;BP;CC;BP;MF;CC;BP;MF;MF;CC;BP;CC;CC;BP;MF;BP;BP;BP;BP;MF;BP;BP;BP;CC;BP;BP;BP;BP;BP;CC;CC;…	regulation of transcription by RNA polymerase II;rDNA binding;nucleosome array spacer activity;histone octamer slider activity;transcription corepressor activity;embryonic hindlimb morphogenesis;regulation of jasmonic acid mediated signaling pathway;positive regulation of myoblast differentiation;DNA damage response;transcription coactivator binding;negative regulation of cell differentiation;nuc…	K11665	-	-	chromatin-remodeling ATPase INO80 isoform X1 [Homo sapiens]	PF00176.27	SNF2-related domain	Chromatin-remodeling ATPase INO80 OS=Homo sapiens OX=9606 GN=INO80 PE=1 SV=2	4MVF2	L	DNA-binding domain	COG0553	Superfamily II DNA or RNA helicase, SNF2 family	KL	-	KOG0388	[L]	Replication, recombination and repair;	SNF2 family DNA-dependent ATPase	-	row-236
transcript:ENST00000553486	transcript:ENST00000553486	0.879191	-10.2161	1.35727e-29	8.87927e-28	down	0	2.38319	0	167	GO:0055085;GO:0005777;GO:0042626;GO:0015420;GO:0006635;GO:0042760;GO:0009235;GO:0007031;GO:0015910;GO:0016020;GO:0043190;GO:0015889;GO:0005524;GO:0042802;GO:0005324;GO:0005789;GO:1990830;GO:0016887;GO:0005765;GO:0005778;	BP;CC;MF;MF;BP;BP;BP;BP;BP;CC;CC;BP;MF;MF;MF;CC;BP;MF;CC;CC;	transmembrane transport;peroxisome;ATPase-coupled transmembrane transporter activity;ABC-type vitamin B12 transporter activity;fatty acid beta-oxidation;very long-chain fatty acid catabolic process;cobalamin metabolic process;peroxisome organization;long-chain fatty acid import into peroxisome;membrane;ATP-binding cassette (ABC) transporter complex;cobalamin transport;ATP binding;identical protei…	K05678	ko02010;ko04146	ABC transporters;Peroxisome	lysosomal cobalamin transporter ABCD4 isoform X6 [Homo sapiens]	PF06472.19	ABC transporter transmembrane region 2	Lysosomal cobalamin transporter ABCD4 OS=Homo sapiens OX=9606 GN=ABCD4 PE=1 SV=1	4N03T	Q	ABC transporter transmembrane region 2	-	-	-	-	KOG0060	[IR]	Lipid transport and metabolism; General function prediction only;	Long-chain acyl-CoA transporter, ABC superfamily (involved in peroxisome organization and biogenesis)	-	row-237
transcript:ENST00000572008	transcript:ENST00000572008	1.3379	10.1583	2.73464e-29	1.78152e-27	up	5.38991	0	125	0	GO:0070062;GO:0043009;GO:0098793;GO:0005654;GO:0005730;GO:0005739;GO:0032040;GO:0006412;GO:0042274;GO:0022627;GO:0022626;GO:0005840;GO:0009506;GO:0002181;GO:0005737;GO:0042788;GO:0003723;GO:0031012;GO:0030218;GO:0010494;GO:0005634;GO:0045787;GO:0098794;GO:1990904;GO:0016020;GO:0019843;GO:0045202;GO:0009615;GO:0140242;GO:0000325;GO:0008284;GO:0003735;GO:0005829;GO:0007420;GO:0009505;GO:0051726;GO:…	CC;BP;CC;CC;CC;CC;CC;BP;BP;CC;CC;CC;CC;BP;CC;CC;MF;CC;BP;CC;CC;BP;CC;CC;CC;MF;CC;BP;BP;CC;BP;MF;CC;BP;CC;BP;BP;	extracellular exosome;chordate embryonic development;presynapse;nucleoplasm;nucleolus;mitochondrion;small-subunit processome;translation;ribosomal small subunit biogenesis;cytosolic small ribosomal subunit;cytosolic ribosome;ribosome;plasmodesma;cytoplasmic translation;cytoplasm;obsolete polysomal ribosome;RNA binding;extracellular matrix;erythrocyte differentiation;cytoplasmic stress granule;nuc…	K02957	ko03010	Ribosome	40S ribosomal protein S15a isoform X3 [Apodemus sylvaticus]	PF00410.23	Ribosomal protein S8	Small ribosomal subunit protein uS8 OS=Rattus norvegicus OX=10116 GN=Rps15a PE=1 SV=2	49AVU	J	ribosomal protein	COG0096	Ribosomal protein S8	J	Translation, ribosomal structure and biogenesis	KOG1754	[J]	Translation, ribosomal structure and biogenesis;	40S ribosomal protein S15/S22	-	row-238
transcript:ENST00000401730	transcript:ENST00000401730	1.83175	2.92251	3.11259e-29	2.01929e-27	up	6.09597	0.785702	556	94	GO:0005681;GO:0010228;GO:0071028;GO:0000243;GO:0031047;GO:0045663;GO:0006974;GO:0061158;GO:0005634;GO:0061084;GO:0048598;GO:0000398;GO:0061157;GO:1902811;GO:0036099;GO:0016604;GO:0010830;GO:0071004;GO:0005847;GO:0035925;GO:0045892;GO:0003730;GO:0005654;GO:1900871;GO:0097157;GO:0033119;GO:0043565;GO:0048255;GO:0030684;GO:1990715;GO:0043231;GO:0017069;GO:0005737;GO:0036002;GO:1990446;GO:0071013;GO:…	CC;BP;BP;CC;BP;BP;BP;BP;CC;BP;BP;BP;BP;BP;BP;CC;BP;CC;CC;MF;BP;MF;CC;BP;MF;BP;MF;BP;CC;MF;CC;MF;CC;MF;MF;CC;BP;CC;BP;CC;BP;BP;BP;BP;BP;CC;CC;BP;CC;MF;BP;BP;BP;MF;BP;BP;BP;MF;CC;BP;BP;MF;BP;CC;CC;MF;BP;BP;BP;MF;BP;BP;BP;CC;BP;MF;BP;BP;BP;BP;BP;CC;BP;CC;BP;CC;	spliceosomal complex;vegetative to reproductive phase transition of meristem;nuclear mRNA surveillance;commitment complex;regulatory ncRNA-mediated gene silencing;positive regulation of myoblast differentiation;DNA damage response;3'-UTR-mediated mRNA destabilization;nucleus;negative regulation of protein refolding;embryonic morphogenesis;mRNA splicing, via spliceosome;mRNA destabilization;positi…	K11093	ko03040	Spliceosome	U1 small nuclear ribonucleoprotein 70 kDa isoform X2 [Loxodonta africana]	PF12220.12	U1 small nuclear ribonucleoprotein of 70kDa MW N terminal	U1 small nuclear ribonucleoprotein 70 kDa OS=Mus musculus OX=10090 GN=Snrnp70 PE=1 SV=2	4MDTE	A	U1 small nuclear ribonucleoprotein of 70kDa MW N terminal	COG0724	RNA recognition motif (RRM) domain	J	Translation, ribosomal structure and biogenesis	KOG0113	[A]	RNA processing and modification;	U1 small nuclear ribonucleoprotein (RRM superfamily)	-	row-239
gene:ENSG00000168970	JMJD7-PLA2G4B	0.618674	-10.19	3.70793e-29	2.39554e-27	down	0	1.35765	0	164	GO:0001778;GO:0048814;GO:1990110;GO:0006508;GO:0019722;GO:0015908;GO:0010243;GO:0009651;GO:0005546;GO:0010765;GO:0099502;GO:0071558;GO:0046475;GO:1902305;GO:0050796;GO:0035556;GO:0004623;GO:0048791;GO:0071277;GO:0003254;GO:0006663;GO:0046850;GO:0004622;GO:0008970;GO:0001542;GO:0046975;GO:0017075;GO:0032922;GO:1900457;GO:0006906;GO:0010033;GO:0003700;GO:0005634;GO:0031982;GO:0005771;GO:0035035;GO:…	BP;BP;BP;BP;BP;BP;BP;BP;MF;BP;BP;MF;BP;BP;BP;BP;MF;BP;BP;BP;BP;BP;MF;MF;BP;MF;MF;BP;BP;BP;BP;MF;CC;CC;CC;MF;BP;BP;CC;CC;MF;BP;MF;CC;MF;MF;BP;MF;BP;BP;BP;BP;CC;MF;BP;BP;BP;BP;BP;BP;BP;MF;CC;BP;MF;BP;CC;MF;BP;MF;BP;MF;BP;CC;MF;BP;BP;MF;BP;BP;BP;BP;CC;CC;BP;CC;BP;BP;CC;CC;MF;MF;CC;MF;BP;BP;MF;CC;CC;BP;CC;BP;CC;BP;MF;CC;BP;BP;CC;BP;BP;BP;BP;CC;CC;CC;BP;BP;CC;BP;MF;BP;BP;CC;BP;BP;CC;MF;MF;BP;MF;BP;MF;…	plasma membrane repair;regulation of dendrite morphogenesis;callus formation;proteolysis;calcium-mediated signaling;fatty acid transport;obsolete response to organonitrogen compound;response to salt stress;phosphatidylinositol-4,5-bisphosphate binding;positive regulation of sodium ion transport;calcium-dependent activation of synaptic vesicle fusion;histone H3K27me2/H3K27me3 demethylase activity;…	K16342	ko04270;ko04014;ko00564;ko04921;ko04666;ko04726;ko00565;ko04724;ko05231;ko04664;ko04010;ko04730;ko04912;ko04217;ko04913;ko04611;ko01100;ko00592;ko04370;ko00591;ko04072;ko00590;ko04750	Vascular smooth muscle contraction;Ras signaling pathway;Glycerophospholipid metabolism;Oxytocin signaling pathway;Fc gamma R-mediated phagocytosis;Serotonergic synapse;Ether lipid metabolism;Glutamatergic synapse;Choline metabolism in cancer;Fc epsilon RI signaling pathway;MAPK signaling pathway;Long-term depression;GnRH signaling pathway;Necroptosis;Ovarian steroidogenesis;Platelet activation;M…	JMJD7-PLA2G4B protein isoform a [Homo sapiens]	PF13621.10	Cupin-like domain	Cytosolic phospholipase A2 beta OS=Homo sapiens OX=9606 GN=PLA2G4B PE=1 SV=2	4N40T	ITU	Cytoplasmic phospholipase A2, catalytic subunit	COG2850	Ribosomal protein L16 Arg81 hydroxylase, contains JmjC domain	J	Translation, ribosomal structure and biogenesis	KOG1325	[I]	Lipid transport and metabolism;	Lysophospholipase	-	row-240
transcript:ENST00000583147	transcript:ENST00000583147	1.0572	4.32135	3.84372e-29	2.47301e-27	up	2.81257	0.135742	189	12	GO:0030514;GO:0045765;GO:0030900;GO:0001707;GO:0002062;GO:0048264;GO:0045668;GO:0001568;GO:0001818;GO:0005615;GO:0030510;GO:0008201;GO:0009888;GO:0035162;GO:0007435;GO:0001503;GO:0005576;GO:0050431;GO:0030511;GO:0030509;GO:0030097;GO:0007378;GO:0061133;GO:2000562;GO:0043010;GO:0060391;GO:0030513;GO:0036122;GO:2000515;	BP;BP;BP;BP;BP;BP;BP;BP;BP;CC;BP;MF;BP;BP;BP;BP;CC;MF;BP;BP;BP;BP;MF;BP;BP;BP;BP;MF;BP;	negative regulation of BMP signaling pathway;regulation of angiogenesis;forebrain development;mesoderm formation;chondrocyte differentiation;determination of ventral identity;negative regulation of osteoblast differentiation;blood vessel development;negative regulation of cytokine production;extracellular space;regulation of BMP signaling pathway;heparin binding;tissue development;embryonic hemop…	K25743	-	-	twisted gastrulation protein homolog 1 isoform X2 [Macaca thibetana thibetana]	-	-	Twisted gastrulation protein homolog 1 OS=Homo sapiens OX=9606 GN=TWSG1 PE=1 SV=1	4N21M	T	multicellular organism development	-	-	-	-	-	-	-	-	-	row-241
transcript:ENST00000452389	transcript:ENST00000452389	0.651429	-10.1812	5.19519e-29	3.32877e-27	down	0	1.46717	0	163	GO:0006888;GO:0033116;GO:0046872;GO:0005794;GO:0051286;GO:0007030;GO:0005797;GO:0050774;GO:0005634;GO:0032153;GO:0016020;GO:0005801;GO:0006487;GO:0034976;GO:0005789;GO:0070925;GO:0090161;GO:0005829;GO:0000139;GO:0015031;GO:0007283;GO:0006996;GO:0030154;GO:0061951;	BP;CC;MF;CC;CC;BP;CC;BP;CC;CC;CC;CC;BP;BP;CC;BP;BP;CC;CC;BP;BP;BP;BP;BP;	endoplasmic reticulum to Golgi vesicle-mediated transport;endoplasmic reticulum-Golgi intermediate compartment membrane;metal ion binding;Golgi apparatus;cell tip;Golgi organization;Golgi medial cisterna;negative regulation of dendrite morphogenesis;nucleus;cell division site;membrane;cis-Golgi network;protein N-linked glycosylation;response to endoplasmic reticulum stress;endoplasmic reticulum m…	K26797	-	-	Golgi reassembly-stacking protein 1 isoform X5 [Pan paniscus]	PF04495.18	GRASP55/65 PDZ-like domain	Golgi reassembly-stacking protein 1 OS=Homo sapiens OX=9606 GN=GORASP1 PE=1 SV=3	4MWSA	U	Golgi reassembly stacking protein 1	-	-	-	-	KOG3834	[U]	Intracellular trafficking, secretion, and vesicular transport;	Golgi reassembly stacking protein GRASP65, contains PDZ domain	-	row-242
gene:ENSG00000136244	IL6	4.97669	2.50897	5.53254e-29	3.52718e-27	up	73.8055	12.2535	2493	562	GO:0032757;GO:0033138;GO:0008083;GO:0005788;GO:0032868;GO:0010574;GO:0006953;GO:0032733;GO:0002690;GO:1902512;GO:0050796;GO:0045944;GO:0042531;GO:2000660;GO:0061888;GO:0001878;GO:0060252;GO:0070102;GO:0045454;GO:0031669;GO:0097398;GO:0042593;GO:0072574;GO:0050871;GO:0009897;GO:0051602;GO:0072540;GO:0031667;GO:0010628;GO:0009611;GO:0150077;GO:0071392;GO:0019221;GO:0045669;GO:0043065;GO:0051240;GO:…	BP;BP;MF;CC;BP;BP;BP;BP;BP;BP;BP;BP;BP;BP;BP;BP;BP;BP;BP;BP;BP;BP;BP;BP;CC;BP;BP;BP;BP;BP;BP;BP;BP;BP;BP;BP;BP;BP;BP;BP;BP;BP;BP;BP;BP;BP;BP;BP;BP;BP;BP;BP;BP;BP;BP;BP;BP;BP;MF;BP;BP;BP;BP;BP;BP;BP;BP;BP;BP;BP;CC;BP;BP;BP;BP;BP;BP;BP;BP;BP;BP;BP;BP;BP;BP;BP;BP;BP;BP;BP;BP;BP;BP;BP;BP;BP;MF;BP;BP;BP;BP;BP;BP;BP;BP;BP;BP;BP;BP;BP;BP;BP;BP;BP;BP;BP;BP;BP;BP;BP;BP;BP;BP;BP;BP;BP;BP;BP;BP;MF;BP;BP;BP;…	positive regulation of interleukin-8 production;positive regulation of peptidyl-serine phosphorylation;growth factor activity;endoplasmic reticulum lumen;response to insulin;regulation of vascular endothelial growth factor production;acute-phase response;positive regulation of interleukin-10 production;positive regulation of leukocyte chemotaxis;positive regulation of apoptotic DNA fragmentation;…	K05405	ko01521;ko04672;ko05410;ko04623;ko04933;ko04151;ko05202;ko05167;ko04061;ko05133;ko05323;ko05169;ko04066;ko05162;ko05134;ko04060;ko05144;ko05161;ko04218;ko05200;ko05020;ko05143;ko05166;ko04640;ko05152;ko04931;ko04668;ko04621;ko04625;ko04620;ko01523;ko04630;ko04932;ko05132;ko04657;ko05164;ko05168;ko04659;ko05146;ko05163;ko05135;ko05321;ko05332;ko05142;ko04068	EGFR tyrosine kinase inhibitor resistance;Intestinal immune network for IgA production;Hypertrophic cardiomyopathy;Cytosolic DNA-sensing pathway;AGE-RAGE signaling pathway in diabetic complications;PI3K-Akt signaling pathway;Transcriptional misregulation in cancer;Kaposi sarcoma-associated herpesvirus infection;Viral protein interaction with cytokine and cytokine receptor;Pertussis;Rheumatoid art…	interleukin-6 isoform X2 [Homo sapiens]	PF00489.21	Interleukin-6/G-CSF/MGF family	Interleukin-6 OS=Homo sapiens OX=9606 GN=IL6 PE=1 SV=1	4N1R3	T	Interleukin 6	-	-	-	-	-	-	-	-	-	row-243
transcript:ENST00000607882	transcript:ENST00000607882	0.685737	10.135	5.55015e-29	3.52718e-27	up	1.58735	0	123	0	GO:0030425;GO:0001933;GO:0048261;GO:0005730;GO:0006612;GO:0061630;GO:0008270;GO:0046580;GO:0003677;GO:0097531;GO:0032764;GO:0060368;GO:0007165;GO:0098935;GO:0050728;GO:0043305;GO:0031901;GO:0005737;GO:0006625;GO:0031982;GO:0043303;GO:0055037;GO:0038109;GO:0033004;GO:0002686;GO:0043122;GO:0051649;GO:0005769;GO:1900235;GO:0071356;GO:0006897;GO:0031267;GO:0031593;GO:0005085;GO:0007265;GO:0005829;GO:…	CC;BP;BP;CC;BP;MF;MF;BP;MF;BP;BP;BP;BP;BP;BP;BP;CC;CC;BP;CC;BP;CC;BP;BP;BP;BP;BP;CC;BP;BP;BP;MF;MF;MF;BP;CC;BP;CC;BP;BP;BP;BP;	dendrite;negative regulation of protein phosphorylation;negative regulation of receptor-mediated endocytosis;nucleolus;protein targeting to membrane;ubiquitin protein ligase activity;zinc ion binding;negative regulation of Ras protein signal transduction;DNA binding;mast cell migration;negative regulation of mast cell cytokine production;regulation of Fc receptor mediated stimulatory signaling pa…	K20131	-	-	PREDICTED: rab5 GDP/GTP exchange factor-like [Miniopterus natalensis]	PF01754.20	A20-like zinc finger	Rab5 GDP/GTP exchange factor OS=Homo sapiens OX=9606 GN=RABGEF1 PE=1 SV=3	4MUZ1	U	Domain present in VPS9	-	-	-	-	KOG3173	[R]	General function prediction only;	Predicted Zn-finger protein	-	row-244
transcript:ENST00000413697	transcript:ENST00000413697	1.30267	-3.0873	7.86353e-29	4.97704e-27	down	0.396907	3.3563	55	601	GO:0005657;GO:0006260;GO:0042276;GO:0017125;GO:0019985;GO:0005654;GO:0003887;GO:0009411;GO:0006302;GO:0002206;GO:0016779;GO:0003684;GO:0046872;GO:0043150;GO:0005634;GO:0070987;GO:0010569;	CC;BP;BP;MF;BP;CC;MF;BP;BP;BP;MF;MF;MF;BP;CC;BP;BP;	replication fork;DNA replication;error-prone translesion synthesis;deoxycytidyl transferase activity;translesion synthesis;nucleoplasm;DNA-directed DNA polymerase activity;response to UV;double-strand break repair;gene conversion of immunoglobulin genes;nucleotidyltransferase activity;damaged DNA binding;metal ion binding;DNA synthesis involved in double-strand break repair via homologous recombi…	K03515	ko03460	Fanconi anemia pathway	DNA repair protein REV1 isoform X10 [Homo sapiens]	-	-	DNA repair protein REV1 OS=Pongo abelii OX=9601 GN=REV1 PE=2 SV=1	4MVM2	L	error-prone translesion synthesis	-	-	-	-	KOG2093	[L]	Replication, recombination and repair;	Translesion DNA polymerase - REV1 deoxycytidyl transferase	-	row-245
transcript:ENST00000474964	transcript:ENST00000474964	0.652674	10.1232	7.92201e-29	4.99375e-27	up	1.47143	0	122	0	GO:0000781;GO:0004386;GO:0005654;GO:0042555;GO:0071162;GO:0046872;GO:0003677;GO:0007049;GO:0071353;GO:0042393;GO:0019899;GO:0003688;GO:0030261;GO:0003697;GO:0005737;GO:0006334;GO:0005634;GO:1902975;GO:0005524;GO:0090102;GO:0000727;GO:0000785;GO:0006268;GO:0006279;GO:0006260;GO:0005664;GO:0006270;GO:0016887;GO:0030174;GO:0051301;GO:0006915;	CC;MF;CC;CC;CC;MF;MF;BP;BP;MF;MF;MF;BP;MF;CC;BP;CC;BP;MF;BP;BP;CC;BP;BP;BP;CC;BP;MF;BP;BP;BP;	chromosome, telomeric region;helicase activity;nucleoplasm;MCM complex;CMG complex;metal ion binding;DNA binding;cell cycle;cellular response to interleukin-4;histone binding;enzyme binding;DNA replication origin binding;chromosome condensation;single-stranded DNA binding;cytoplasm;nucleosome assembly;nucleus;mitotic DNA replication initiation;ATP binding;cochlea development;double-strand break r…	K02540	ko04110;ko03030;ko00604	Cell cycle;DNA replication;Glycosphingolipid biosynthesis - ganglio series	DNA replication licensing factor MCM2 isoform X2 [Macaca fascicularis]	PF12619.12	Mini-chromosome maintenance protein 2	DNA replication licensing factor MCM2 OS=Homo sapiens OX=9606 GN=MCM2 PE=1 SV=4	4MVE5	L	Mini-chromosome maintenance protein 2	-	-	-	-	KOG0477	[L]	Replication, recombination and repair;	DNA replication licensing factor, MCM2 component	-	row-246
gene:ENSG00000272897	gene:ENSG00000272897	0.973649	5.4303	8.14096e-29	5.11108e-27	up	2.67014	0.050781	139	4	GO:0002937;GO:0008033;GO:0019448;GO:0005654;GO:0005739;GO:0044572;GO:0008270;GO:0046872;GO:0009589;GO:0072348;GO:0002098;GO:0051536;GO:0005759;GO:0009000;GO:1990221;GO:1990229;GO:0002143;GO:0030170;GO:0016261;GO:0005737;GO:0009536;GO:0018131;GO:0005634;GO:0006879;GO:0044571;GO:0018283;GO:0032047;GO:0043545;GO:0034227;GO:0005524;GO:0097163;GO:0005813;GO:0051537;GO:0004123;GO:0042803;GO:0070903;GO:…	BP;BP;BP;CC;CC;BP;MF;MF;BP;BP;BP;MF;CC;MF;CC;CC;BP;MF;BP;CC;CC;BP;CC;BP;BP;BP;CC;BP;BP;MF;MF;CC;MF;MF;MF;BP;CC;CC;MF;BP;CC;CC;BP;BP;CC;BP;	tRNA 4-thiouridine biosynthesis;tRNA processing;L-cysteine catabolic process;nucleoplasm;mitochondrion;[4Fe-4S] cluster assembly;zinc ion binding;metal ion binding;detection of UV;sulfur compound transport;tRNA wobble uridine modification;iron-sulfur cluster binding;mitochondrial matrix;selenocysteine lyase activity;L-cysteine desulfurase complex;iron-sulfur cluster assembly complex;tRNA wobble p…	K04487	ko00730;ko01100;ko04122	Thiamine metabolism;Metabolic pathways;Sulfur relay system	cysteine desulfurase isoform X2 [Pan paniscus]	PF00266.23	Aminotransferase class-V	Cysteine desulfurase OS=Homo sapiens OX=9606 GN=NFS1 PE=1 SV=3	4M7FN	E	Cysteine desulfurase	COG1104	Cysteine desulfurase/Cysteine sulfinate desulfinase IscS or related enzyme, NifS family	E	Amino acid transport and metabolism	KOG1549	[E]	Amino acid transport and metabolism;	Cysteine desulfurase NFS1	-	row-247
transcript:ENST00000539548	transcript:ENST00000539548	3.19621	-2.63572	8.67151e-29	5.4223e-27	down	3.14196	19.2816	201	1604	GO:0070062;GO:0050927;GO:0005925;GO:0002040;GO:0045296;GO:0005886;GO:0030169;GO:0000902;GO:0048471;GO:0043542;GO:0043005;GO:0043616;GO:0062023;GO:0005912;GO:0005615;GO:0071813;GO:0034332;GO:0001954;GO:0048661;GO:0005737;GO:0007162;GO:0009897;GO:0042058;GO:0016339;GO:0005576;GO:0050850;GO:0007156;GO:0045202;GO:0008285;GO:0009986;GO:0001938;GO:0042802;GO:0030100;GO:0044331;GO:0005509;GO:0030335;GO:…	CC;BP;CC;BP;MF;CC;MF;BP;CC;BP;CC;BP;CC;CC;CC;MF;BP;BP;BP;CC;BP;CC;BP;BP;CC;BP;BP;CC;BP;CC;BP;MF;BP;BP;MF;BP;MF;CC;BP;BP;BP;CC;BP;CC;BP;CC;CC;BP;BP;	extracellular exosome;positive regulation of positive chemotaxis;focal adhesion;sprouting angiogenesis;cadherin binding;plasma membrane;low-density lipoprotein particle binding;cell morphogenesis;perinuclear region of cytoplasm;endothelial cell migration;neuron projection;keratinocyte proliferation;collagen-containing extracellular matrix;adherens junction;extracellular space;lipoprotein particle…	K06808	-	-	cadherin-13 isoform X3 [Cebus imitator]	PF08758.15	Cadherin prodomain like	Cadherin-13 OS=Homo sapiens OX=9606 GN=CDH13 PE=1 SV=1	4MG7E	S	Cadherin 13	-	-	-	-	KOG3593	[T]	Signal transduction mechanisms;	Predicted receptor-like serine/threonine kinase	-	row-248
gene:ENSG00000185507	IRF7	2.50673	2.80824	9.09737e-29	5.66584e-27	up	11.4935	1.58534	661	121	GO:0006357;GO:1990841;GO:0002753;GO:0001228;GO:0032733;GO:0007166;GO:0045944;GO:0000786;GO:0006974;GO:1990837;GO:0039530;GO:0003700;GO:0006366;GO:0005634;GO:0060644;GO:0045627;GO:0072540;GO:0016020;GO:0000122;GO:0009615;GO:0006914;GO:0007249;GO:0019221;GO:0019043;GO:0043065;GO:0140374;GO:0071356;GO:0003713;GO:0019904;GO:0060337;GO:0043330;GO:0050727;GO:0002819;GO:0032495;GO:0045892;GO:0060173;GO:…	BP;MF;BP;MF;BP;BP;BP;CC;BP;MF;BP;MF;BP;CC;BP;BP;BP;CC;BP;BP;BP;BP;BP;BP;BP;BP;BP;MF;MF;BP;BP;BP;BP;BP;BP;BP;BP;BP;BP;CC;CC;BP;BP;BP;MF;BP;BP;BP;BP;BP;BP;CC;BP;BP;BP;BP;BP;MF;BP;BP;BP;BP;BP;BP;MF;CC;BP;MF;BP;BP;BP;BP;BP;BP;BP;BP;BP;BP;BP;CC;BP;BP;CC;MF;BP;BP;BP;BP;BP;BP;BP;BP;BP;BP;BP;BP;BP;MF;BP;BP;CC;BP;CC;BP;BP;BP;BP;BP;BP;BP;MF;BP;BP;CC;BP;BP;MF;BP;BP;BP;BP;BP;BP;BP;BP;BP;BP;MF;BP;BP;BP;BP;BP;…	regulation of transcription by RNA polymerase II;promoter-specific chromatin binding;cytoplasmic pattern recognition receptor signaling pathway;DNA-binding transcription activator activity, RNA polymerase II-specific;positive regulation of interleukin-10 production;cell surface receptor signaling pathway;positive regulation of transcription by RNA polymerase II;nucleosome;DNA damage response;sequ…	K09447	ko04621;ko04620;ko04622;ko04623;ko05203;ko05167;ko05164;ko05169;ko05168;ko05162;ko05161;ko05160	NOD-like receptor signaling pathway;Toll-like receptor signaling pathway;RIG-I-like receptor signaling pathway;Cytosolic DNA-sensing pathway;Viral carcinogenesis;Kaposi sarcoma-associated herpesvirus infection;Influenza A;Epstein-Barr virus infection;Herpes simplex virus 1 infection;Measles;Hepatitis B;Hepatitis C	interferon regulatory factor 7 isoform d [Homo sapiens]	PF10401.13	Interferon-regulatory factor 3	Interferon regulatory factor 7 OS=Homo sapiens OX=9606 GN=IRF7 PE=1 SV=2	4MTHP	K	Interferon regulatory factor 7	-	-	-	-	-	-	-	-	IRF	row-249
transcript:ENST00000497136	transcript:ENST00000497136	2.57853	-2.57126	1.06826e-28	6.6266e-27	down	1.91615	11.2354	276	2106	GO:0016020;GO:0006886;GO:0005829;GO:0007507;GO:0060271;GO:0005802;GO:0035264;GO:0031410;GO:0008589;GO:0015630;GO:0005765;GO:0060322;GO:0005737;GO:0099041;GO:0001755;GO:0005930;GO:0005634;GO:0005929;GO:0036064;	CC;BP;CC;BP;BP;CC;BP;CC;BP;CC;CC;BP;CC;BP;BP;CC;CC;CC;CC;	membrane;intracellular protein transport;cytosol;heart development;cilium assembly;trans-Golgi network;multicellular organism growth;cytoplasmic vesicle;regulation of smoothened signaling pathway;microtubule cytoskeleton;lysosomal membrane;head development;cytoplasm;vesicle tethering to Golgi;neural crest cell migration;axoneme;nucleus;cilium;ciliary basal body;	K24260	-	-	WD repeat-containing protein 11 isoform X2 [Oryctolagus cuniculus]	-	-	WD repeat-containing protein 11 OS=Homo sapiens OX=9606 GN=WDR11 PE=1 SV=1	4N512	S	WD repeat domain 11	-	-	-	-	KOG1912	[R]	General function prediction only;	WD40 repeat protein	-	row-250
transcript:ENST00000511480	transcript:ENST00000511480	0.446236	-4.09806	1.29663e-28	8.01133e-27	down	0.04258	0.780538	13	288	GO:0005829;GO:0005524;GO:0004520;GO:0043130;GO:0046404;GO:0004519;	CC;MF;MF;MF;MF;MF;	cytosol;ATP binding;DNA endonuclease activity;ubiquitin binding;ATP-dependent polydeoxyribonucleotide 5'-hydroxyl-kinase activity;endonuclease activity;	K15720	-	-	NEDD4-binding protein 2 isoform X4 [Homo sapiens]	-	-	NEDD4-binding protein 2 OS=Homo sapiens OX=9606 GN=N4BP2 PE=1 SV=2	4N4QQ	L	DUF1771	-	-	-	-	KOG2401	[L]	Replication, recombination and repair;	Predicted MutS-related protein involved in mismatch repair	-	row-251
transcript:ENST00000636398	transcript:ENST00000636398	0.965614	-6.97503	1.33602e-28	8.22208e-27	down	0.010914	2.77262	1	179	GO:0000922;GO:0060285;GO:0043025;GO:1903251;GO:0039010;GO:0007052;GO:0010975;GO:0072686;GO:0006874;GO:0021795;GO:0005813;GO:0005930;GO:1990830;GO:0005509;GO:0005929;GO:0043065;GO:0051302;GO:0005879;GO:0000281;GO:0043014;GO:0036064;	CC;BP;CC;BP;BP;BP;BP;CC;BP;BP;CC;CC;BP;MF;CC;BP;BP;CC;BP;MF;CC;	spindle pole;cilium-dependent cell motility;neuronal cell body;multi-ciliated epithelial cell differentiation;specification of pronephric distal tubule identity;mitotic spindle organization;regulation of neuron projection development;mitotic spindle;intracellular calcium ion homeostasis;cerebral cortex cell migration;centrosome;axoneme;cellular response to leukemia inhibitory factor;calcium ion b…	K23029	-	-	EF-hand domain-containing protein 1 isoform X3 [Pan paniscus]	PF06565.16	DM10 domain	EF-hand domain-containing protein 1 OS=Homo sapiens OX=9606 GN=EFHC1 PE=1 SV=1	4MVT2	S	DUF1126 PH-like domain	-	-	-	-	KOG0043	[S]	Function unknown;	Uncharacterized conserved protein, contains DM10 domain	-	row-252
gene:ENSG00000089127	OAS1	3.36027	2.64694	1.56738e-28	9.60793e-27	up	22.1298	3.55946	1001	205	GO:0034138;GO:0051607;GO:0005654;GO:0005739;GO:0005730;GO:0046872;GO:0001730;GO:0005783;GO:0009617;GO:0003677;GO:1900246;GO:0006164;GO:0005840;GO:0005886;GO:0048471;GO:2000342;GO:0001541;GO:0005615;GO:0043231;GO:0001542;GO:0039529;GO:0071650;GO:0005737;GO:1904188;GO:0048525;GO:0042742;GO:0039530;GO:0003723;GO:0005634;GO:0071659;GO:0042593;GO:0034142;GO:1903487;GO:0006401;GO:0005576;GO:0016020;GO:…	BP;BP;CC;CC;CC;MF;MF;CC;BP;MF;BP;BP;CC;CC;CC;BP;BP;CC;CC;BP;BP;BP;CC;BP;BP;BP;BP;MF;CC;BP;BP;BP;BP;BP;CC;CC;BP;BP;BP;MF;BP;MF;MF;BP;CC;BP;BP;BP;BP;CC;BP;BP;BP;MF;BP;BP;BP;BP;MF;BP;BP;BP;BP;	toll-like receptor 3 signaling pathway;defense response to virus;nucleoplasm;mitochondrion;nucleolus;metal ion binding;2'-5'-oligoadenylate synthetase activity;endoplasmic reticulum;response to bacterium;DNA binding;positive regulation of RIG-I signaling pathway;purine nucleotide biosynthetic process;ribosome;plasma membrane;perinuclear region of cytoplasm;negative regulation of chemokine (C-X-C …	K14216	ko05160;ko05162;ko05168;ko05169;ko05164;ko04621	Hepatitis C;Measles;Herpes simplex virus 1 infection;Epstein-Barr virus infection;Influenza A;NOD-like receptor signaling pathway	2'-5'-oligoadenylate synthase 1 isoform 3 [Homo sapiens]	PF10421.13	2'-5'-oligoadenylate synthetase 1, domain 2, C-terminus	2'-5'-oligoadenylate synthase 1 OS=Homo sapiens OX=9606 GN=OAS1 PE=1 SV=4	4MXW4	F	2'-5'-oligoadenylate synthetase 1, domain 2, C-terminus	-	-	-	-	-	-	-	-	-	row-253
transcript:ENST00000536606	transcript:ENST00000536606	1.51597	10.0994	1.62022e-28	9.89287e-27	up	7.17903	0	120	0	GO:0042546;GO:0006508;GO:0140220;GO:0007107;GO:0031985;GO:0032869;GO:0000055;GO:0006913;GO:0030140;GO:0072659;GO:0000278;GO:0016032;GO:0005546;GO:0071389;GO:0000045;GO:0048023;GO:0045296;GO:0044877;GO:0090383;GO:0035281;GO:0046827;GO:0051168;GO:0007030;GO:0042733;GO:0033298;GO:0016192;GO:0007052;GO:0006906;GO:0032586;GO:0005634;GO:0048514;GO:0031982;GO:0005049;GO:0009792;GO:1901987;GO:0042593;GO:…	BP;BP;CC;BP;CC;BP;BP;BP;CC;BP;BP;BP;MF;BP;BP;BP;MF;MF;BP;BP;BP;BP;BP;BP;BP;BP;BP;BP;CC;CC;BP;CC;MF;BP;BP;BP;CC;BP;MF;BP;BP;BP;CC;CC;BP;BP;BP;BP;MF;BP;CC;BP;BP;MF;CC;CC;CC;BP;BP;CC;BP;BP;BP;CC;BP;CC;BP;BP;BP;CC;BP;BP;MF;BP;CC;CC;CC;CC;BP;BP;BP;BP;BP;CC;CC;CC;BP;CC;CC;CC;CC;CC;BP;BP;CC;CC;BP;CC;CC;CC;BP;CC;CC;BP;BP;MF;CC;CC;CC;BP;CC;MF;CC;CC;CC;CC;BP;CC;CC;CC;BP;BP;BP;BP;CC;CC;CC;CC;BP;BP;BP;CC;BP;…	cell wall biogenesis;proteolysis;pathogen-containing vacuole;membrane addition at site of cytokinesis;Golgi cisterna;cellular response to insulin stimulus;ribosomal large subunit export from nucleus;nucleocytoplasmic transport;trans-Golgi network transport vesicle;protein localization to plasma membrane;mitotic cell cycle;viral process;phosphatidylinositol-4,5-bisphosphate binding;cellular respon…	K07936	ko03013;ko03008;ko05166	Nucleocytoplasmic transport;Ribosome biogenesis in eukaryotes;Human T-cell leukemia virus 1 infection	GTP-binding nuclear protein Ran isoform X1 [Sapajus apella]	PF00071.26	Ras family	GTP-binding nuclear protein Ran OS=Xenopus laevis OX=8355 GN=ran PE=1 SV=2	4Q4A8	U	snRNA import into nucleus	COG1100	GTPase SAR1 family domain	R	General function prediction only	KOG0096	[U]	Intracellular trafficking, secretion, and vesicular transport;	GTPase Ran/TC4/GSP1 (nuclear protein transport pathway), small G protein superfamily	-	row-254
transcript:ENST00000307849	transcript:ENST00000307849	0.987681	-4.16675	1.93689e-28	1.17803e-26	down	0.137552	2.45678	12	279	GO:0000781;GO:0006281;GO:0005654;GO:0070200;GO:0003677;GO:0000724;GO:0006974;GO:0003697;GO:0005737;GO:0003723;GO:0005634;GO:0070182;GO:0031090;GO:0010212;GO:0005829;GO:0035861;GO:0098505;GO:1904355;GO:0044818;GO:0070876;	CC;BP;CC;BP;MF;BP;BP;MF;CC;MF;CC;MF;CC;BP;CC;CC;MF;BP;BP;CC;	chromosome, telomeric region;DNA repair;nucleoplasm;establishment of protein localization to telomere;DNA binding;double-strand break repair via homologous recombination;DNA damage response;single-stranded DNA binding;cytoplasm;RNA binding;nucleus;DNA polymerase binding;organelle membrane;response to ionizing radiation;cytosol;site of double-strand break;G-rich strand telomeric DNA binding;positi…	-	-	-	SOSS complex subunit B2 isoform X1 [Homo sapiens]	PF21473.1	Single-stranded DNA binding protein Ssb-like, OB fold	SOSS complex subunit B2 OS=Homo sapiens OX=9606 GN=NABP1 PE=1 SV=1	4N3AG	L	Nucleic acid binding protein 1	COG1599	ssDNA-binding replication factor A, large subunit	L	Replication, recombination and repair	KOG3416	[R]	General function prediction only;	Predicted nucleic acid binding protein	-	row-255
gene:ENSG00000261796	ISY1-RAB43	0.446755	-10.1363	2.02521e-28	1.22695e-26	down	0	0.85769	0	158	GO:0000350;GO:0000398;GO:0005681;GO:0005829;GO:0005654;GO:0071020;GO:0071014;GO:2000634;GO:0071006;GO:0005737;GO:0071008;GO:0071007;GO:0003723;GO:0071013;GO:0045292;GO:0005634;GO:0000389;GO:0000384;GO:0000974;	BP;BP;CC;CC;CC;CC;CC;BP;CC;CC;CC;CC;MF;CC;BP;CC;BP;MF;CC;	generation of catalytic spliceosome for second transesterification step;mRNA splicing, via spliceosome;spliceosomal complex;cytosol;nucleoplasm;post-spliceosomal complex;post-mRNA release spliceosomal complex;regulation of primary miRNA processing;U2-type catalytic step 1 spliceosome;cytoplasm;U2-type post-mRNA release spliceosomal complex;U2-type catalytic step 2 spliceosome;RNA binding;catalyti…	K12870	ko03040	Spliceosome	ISY1-RAB43 protein [Homo sapiens]	PF06246.16	Isy1-like splicing family	Pre-mRNA-splicing factor ISY1 homolog OS=Homo sapiens OX=9606 GN=ISY1 PE=1 SV=3	4N1YU	A	generation of catalytic spliceosome for second transesterification step	-	-	-	-	KOG3068	[A]	RNA processing and modification;	mRNA splicing factor	-	row-256
transcript:ENST00000590171	transcript:ENST00000590171	1.23317	10.0874	2.32161e-28	1.40107e-26	up	4.52637	0	119	0	GO:0070062;GO:0005681;GO:0030425;GO:0003730;GO:0005654;GO:0008266;GO:0006412;GO:0009631;GO:0043023;GO:0048255;GO:0006397;GO:0045944;GO:0019899;GO:0016477;GO:0006509;GO:0072004;GO:0048026;GO:0000381;GO:0007369;GO:0045727;GO:0006396;GO:0048793;GO:0005737;GO:0060212;GO:0048025;GO:0003723;GO:0030308;GO:0071013;GO:0006366;GO:1902806;GO:0005634;GO:0044530;GO:0009792;GO:0035196;GO:0015934;GO:0009409;GO:…	CC;CC;CC;MF;CC;MF;BP;BP;MF;BP;BP;BP;MF;BP;BP;BP;BP;BP;BP;BP;BP;BP;CC;BP;BP;MF;BP;CC;BP;BP;CC;CC;BP;BP;CC;BP;BP;MF;BP;BP;BP;MF;BP;BP;BP;BP;MF;MF;MF;CC;MF;CC;BP;	extracellular exosome;spliceosomal complex;dendrite;mRNA 3'-UTR binding;nucleoplasm;poly(U) RNA binding;translation;cold acclimation;ribosomal large subunit binding;mRNA stabilization;mRNA processing;positive regulation of transcription by RNA polymerase II;enzyme binding;cell migration;membrane protein ectodomain proteolysis;kidney field specification;positive regulation of mRNA splicing, via sp…	K13195	-	-	cold-inducible RNA-binding protein isoform X4 [Bubalus kerabau]	PF00076.26	RNA recognition motif	Cold-inducible RNA-binding protein OS=Pongo abelii OX=9601 GN=CIRBP PE=2 SV=1	48VQK	A	small ribosomal subunit rRNA binding	-	-	-	-	KOG0117	[A]	RNA processing and modification;	Heterogeneous nuclear ribonucleoprotein R (RRM superfamily)	-	row-257
gene:ENSG00000163735	CXCL5	1.58474	3.17593	2.47812e-28	1.48974e-26	up	4.89011	0.52751	360	51	GO:0008083;GO:0035580;GO:0019722;GO:0031623;GO:0042119;GO:0010765;GO:0035556;GO:0045944;GO:0070951;GO:0051781;GO:0045663;GO:0008201;GO:1904659;GO:2000535;GO:0050729;GO:0097398;GO:0031091;GO:0031982;GO:0009897;GO:0045236;GO:0030036;GO:0010628;GO:0032642;GO:0019221;GO:0071356;GO:0045091;GO:0031100;GO:0065003;GO:0010744;GO:0007399;GO:0071347;GO:0032930;GO:0002269;GO:2001240;GO:0070098;GO:0007165;GO:…	MF;CC;BP;BP;BP;BP;BP;BP;BP;BP;BP;MF;BP;BP;BP;BP;CC;CC;CC;MF;BP;BP;BP;BP;BP;BP;BP;BP;BP;BP;BP;BP;BP;BP;BP;BP;BP;BP;BP;CC;BP;BP;CC;BP;BP;CC;BP;BP;BP;BP;BP;BP;CC;BP;BP;BP;BP;BP;BP;MF;BP;BP;BP;BP;BP;BP;BP;BP;BP;BP;BP;MF;BP;BP;BP;MF;BP;BP;MF;BP;BP;MF;MF;MF;BP;BP;BP;BP;BP;BP;BP;CC;CC;BP;BP;BP;CC;BP;BP;BP;BP;MF;BP;BP;BP;BP;BP;BP;BP;BP;BP;BP;BP;BP;BP;BP;BP;BP;	growth factor activity;specific granule lumen;calcium-mediated signaling;receptor internalization;neutrophil activation;positive regulation of sodium ion transport;intracellular signal transduction;positive regulation of transcription by RNA polymerase II;regulation of neutrophil mediated killing of gram-negative bacterium;positive regulation of cell division;positive regulation of myoblast diffe…	K05506	ko04062;ko05323;ko04060;ko05133;ko04061;ko04668;ko04657	Chemokine signaling pathway;Rheumatoid arthritis;Cytokine-cytokine receptor interaction;Pertussis;Viral protein interaction with cytokine and cytokine receptor;TNF signaling pathway;IL-17 signaling pathway	C-X-C motif chemokine 5 precursor [Homo sapiens]	PF00048.24	Small cytokines (intecrine/chemokine), interleukin-8 like	C-X-C motif chemokine 5 OS=Homo sapiens OX=9606 GN=CXCL5 PE=1 SV=1	4N72K	O	Intercrine alpha family (small cytokine C-X-C) (chemokine CXC).	-	-	-	-	-	-	-	-	-	row-258
transcript:ENST00000503889	transcript:ENST00000503889	0.412721	-10.1271	2.85399e-28	1.7091e-26	down	0	0.772078	0	157	GO:0006886;GO:0098793;GO:0007269;GO:0045313;GO:0000922;GO:0030141;GO:0072659;GO:0005794;GO:0000149;GO:0045296;GO:0072697;GO:0030667;GO:0005628;GO:0006904;GO:0048471;GO:0005915;GO:0043001;GO:0006893;GO:0051286;GO:0090726;GO:0016192;GO:0030496;GO:0090522;GO:0005737;GO:0016028;GO:0051285;GO:0005634;GO:0032153;GO:0016020;GO:0030072;GO:0030426;GO:0006887;GO:0000145;GO:0016081;GO:0005934;GO:0051601;GO:…	BP;CC;BP;BP;CC;CC;BP;CC;MF;MF;BP;CC;CC;BP;CC;CC;BP;BP;CC;CC;BP;CC;BP;CC;CC;CC;CC;CC;CC;BP;CC;BP;CC;BP;CC;BP;BP;BP;CC;BP;CC;BP;CC;CC;CC;BP;BP;BP;BP;BP;CC;CC;	intracellular protein transport;presynapse;neurotransmitter secretion;rhabdomere membrane biogenesis;spindle pole;secretory granule;protein localization to plasma membrane;Golgi apparatus;SNARE binding;cadherin binding;protein localization to cell cortex;secretory granule membrane;prospore membrane;vesicle docking involved in exocytosis;perinuclear region of cytoplasm;zonula adherens;Golgi to pla…	K06110	-	-	exocyst complex component 3 [Homo sapiens]	PF06046.17	Exocyst complex component Sec6	Exocyst complex component 3 OS=Homo sapiens OX=9606 GN=EXOC3 PE=1 SV=3	4N32S	U	Exocyst complex component	-	-	-	-	KOG2286	[U]	Intracellular trafficking, secretion, and vesicular transport;	Exocyst complex subunit SEC6	-	row-259
transcript:ENST00000474308	transcript:ENST00000474308	0.835552	10.0752	3.33101e-28	1.98712e-26	up	2.18458	0	118	0	GO:0006508;GO:0003957;GO:0002931;GO:0033797;GO:0042537;GO:0016668;GO:0001707;GO:0044877;GO:0070276;GO:0036245;GO:0009060;GO:0006120;GO:0045454;GO:0005634;GO:0009897;GO:0016020;GO:0000303;GO:0071280;GO:0030424;GO:0050137;GO:0050787;GO:0004738;GO:1902493;GO:0016209;GO:0043065;GO:0042542;GO:0034604;GO:0046228;GO:0010035;GO:0031154;GO:0005967;GO:0065003;GO:0050897;GO:0014823;GO:0070995;GO:0015042;GO:…	BP;MF;BP;MF;BP;MF;BP;MF;BP;BP;BP;BP;BP;CC;CC;CC;BP;BP;CC;MF;BP;MF;CC;MF;BP;BP;MF;BP;BP;BP;CC;BP;MF;BP;BP;MF;BP;CC;CC;MF;CC;CC;BP;BP;CC;BP;BP;BP;MF;BP;MF;BP;BP;BP;BP;CC;MF;CC;MF;BP;CC;MF;MF;MF;MF;MF;BP;BP;CC;BP;CC;CC;CC;CC;CC;CC;CC;BP;BP;BP;CC;CC;BP;CC;CC;BP;CC;BP;CC;BP;BP;BP;BP;MF;MF;CC;MF;CC;BP;CC;MF;MF;BP;MF;BP;BP;BP;CC;BP;MF;BP;BP;BP;BP;BP;BP;CC;MF;BP;MF;BP;CC;BP;	proteolysis;NAD(P)+ transhydrogenase (Si-specific) activity;response to ischemia;selenate reductase activity;benzene-containing compound metabolic process;oxidoreductase activity, acting on a sulfur group of donors, NAD(P) as acceptor;mesoderm formation;protein-containing complex binding;halogen metabolic process;cellular response to menadione;aerobic respiration;mitochondrial electron transport,…	K22182	ko00450;ko05225;ko05200	Selenocompound metabolism;Hepatocellular carcinoma;Pathways in cancer	thioredoxin reductase 2, mitochondrial isoform X3 [Gorilla gorilla gorilla]	PF07992.18	Pyridine nucleotide-disulphide oxidoreductase	Thioredoxin reductase 2, mitochondrial OS=Homo sapiens OX=9606 GN=TXNRD2 PE=1 SV=3	4MTFZ	C	Pyridine nucleotide-disulphide oxidoreductase, dimerisation domain	COG1249	Dihydrolipoamide dehydrogenase (E3) component of pyruvate/2-oxoglutarate dehydrogenase complex or glutathione oxidoreductase	C	Energy production and conversion	KOG4716	[O]	Posttranslational modification, protein turnover, chaperones;	Thioredoxin reductase	-	row-260
transcript:ENST00000551092	transcript:ENST00000551092	1.51937	5.37749	4.19752e-28	2.49448e-26	up	6.30119	0.12553	134	4	GO:0035020;GO:0140220;GO:0048261;GO:0043197;GO:0072659;GO:0045196;GO:0048599;GO:0007612;GO:0090354;GO:0032465;GO:0045944;GO:0016236;GO:0006457;GO:1902017;GO:0035591;GO:0051489;GO:0007030;GO:0097061;GO:1903725;GO:0016192;GO:0034614;GO:0048149;GO:0010975;GO:0009404;GO:0009734;GO:0005634;GO:0002090;GO:0009792;GO:0043495;GO:0016020;GO:0016004;GO:0007173;GO:0030017;GO:0014069;GO:0030036;GO:0098629;GO:…	BP;CC;BP;CC;BP;BP;BP;BP;BP;BP;BP;BP;BP;BP;MF;BP;BP;BP;BP;BP;BP;BP;BP;BP;BP;CC;BP;BP;MF;CC;MF;BP;CC;CC;BP;BP;BP;CC;CC;BP;BP;BP;BP;CC;BP;CC;MF;BP;CC;CC;BP;BP;BP;BP;BP;BP;BP;CC;BP;CC;CC;CC;BP;BP;CC;MF;CC;BP;BP;CC;BP;CC;CC;CC;BP;CC;CC;BP;CC;BP;CC;BP;CC;BP;BP;BP;BP;CC;BP;BP;CC;CC;BP;BP;CC;BP;BP;BP;BP;BP;MF;CC;MF;BP;BP;BP;BP;BP;BP;CC;CC;BP;CC;BP;BP;BP;CC;BP;CC;CC;CC;BP;BP;BP;BP;CC;BP;BP;BP;BP;BP;BP;BP;…	regulation of Rac protein signal transduction;pathogen-containing vacuole;negative regulation of receptor-mediated endocytosis;dendritic spine;protein localization to plasma membrane;establishment or maintenance of neuroblast polarity;oocyte development;learning;regulation of auxin metabolic process;regulation of cytokinesis;positive regulation of transcription by RNA polymerase II;macroautophagy…	K07937	ko05134;ko04072;ko04144;ko05110	Legionellosis;Phospholipase D signaling pathway;Endocytosis;Vibrio cholerae infection	ADP-ribosylation factor-like protein 1 [Monodelphis domestica]	PF00025.25	ADP-ribosylation factor family	ADP-ribosylation factor-like protein 1 OS=Caenorhabditis elegans OX=6239 GN=arl-1 PE=2 SV=2	4CDI5	U	ADP-ribosylation factor-like	-	-	-	-	KOG0072	[U]	Intracellular trafficking, secretion, and vesicular transport;	GTP-binding ADP-ribosylation factor-like protein ARL1	-	row-261
transcript:ENST00000465172	transcript:ENST00000465172	2.63811	-2.7594	7.73267e-28	4.57786e-26	down	1.87265	12.4901	106	922	GO:0070062;GO:0071944;GO:0086064;GO:0072659;GO:0005890;GO:0032781;GO:0030007;GO:0042470;GO:0005886;GO:0120036;GO:0010976;GO:0086009;GO:0021670;GO:0006814;GO:1990573;GO:0016323;GO:0036126;GO:0006813;GO:0098984;GO:0005737;GO:1903278;GO:0005391;GO:0031253;GO:0071805;GO:0001917;GO:1903976;GO:0009897;GO:0001671;GO:0016020;GO:0006883;GO:0046982;GO:0031589;GO:0030674;GO:0016328;GO:0097450;GO:0045494;GO:…	CC;CC;BP;BP;CC;BP;BP;CC;CC;BP;BP;BP;BP;BP;BP;CC;CC;BP;CC;CC;BP;MF;CC;BP;CC;BP;CC;MF;CC;BP;MF;BP;MF;CC;CC;BP;CC;MF;CC;CC;BP;BP;BP;BP;BP;BP;CC;BP;BP;BP;BP;BP;BP;	extracellular exosome;cell periphery;cell communication by electrical coupling involved in cardiac conduction;protein localization to plasma membrane;sodium:potassium-exchanging ATPase complex;positive regulation of ATP-dependent activity;intracellular potassium ion homeostasis;melanosome;plasma membrane;plasma membrane bounded cell projection organization;positive regulation of neuron projection…	K01540	ko04925;ko04971;ko04964;ko04976;ko04970;ko04961;ko04974;ko04260;ko04960;ko04973;ko04261;ko04978;ko04972;ko04919;ko04918;ko04024;ko04911;ko04022	Aldosterone synthesis and secretion;Gastric acid secretion;Proximal tubule bicarbonate reclamation;Bile secretion;Salivary secretion;Endocrine and other factor-regulated calcium reabsorption;Protein digestion and absorption;Cardiac muscle contraction;Aldosterone-regulated sodium reabsorption;Carbohydrate digestion and absorption;Adrenergic signaling in cardiomyocytes;Mineral absorption;Pancreatic…	sodium/potassium-transporting ATPase subunit beta-3 isoform X4 [Pan troglodytes]	PF00287.22	Sodium / potassium ATPase beta chain	Sodium/potassium-transporting ATPase subunit beta-3 OS=Homo sapiens OX=9606 GN=ATP1B3 PE=1 SV=1	4N56K	P	Sodium / potassium ATPase beta chain	-	-	-	-	KOG3927	[P]	Inorganic ion transport and metabolism;	Na+/K+ ATPase, beta subunit	-	row-262
transcript:ENST00000543699	transcript:ENST00000543699	2.89308	2.91023	7.87447e-28	4.64415e-26	up	16.5764	2.13962	481	82	GO:0005829;GO:0005654;GO:0005838;GO:0003713;GO:0032024;GO:0097050;GO:0045893;GO:0046676;GO:0005737;GO:0008540;GO:0043425;GO:0005634;GO:0006511;GO:0070682;GO:0045944;	CC;CC;CC;MF;BP;BP;BP;BP;CC;CC;MF;CC;BP;BP;BP;	cytosol;nucleoplasm;proteasome regulatory particle;transcription coactivator activity;positive regulation of insulin secretion;type B pancreatic cell apoptotic process;positive regulation of DNA-templated transcription;negative regulation of insulin secretion;cytoplasm;proteasome regulatory particle, base subcomplex;bHLH transcription factor binding;nucleus;ubiquitin-dependent protein catabolic p…	K06693	-	-	26S proteasome non-ATPase regulatory subunit 9 isoform X4 [Gorilla gorilla gorilla]	PF18265.5	Nas2 N_terminal domain	26S proteasome non-ATPase regulatory subunit 9 OS=Homo sapiens OX=9606 GN=PSMD9 PE=1 SV=3	4N4BK	K	PDZ domain	-	-	-	-	KOG3129	[O]	Posttranslational modification, protein turnover, chaperones;	26S proteasome regulatory complex, subunit PSMD9	-	row-263
transcript:ENST00000459772	transcript:ENST00000459772	1.0229	-3.59603	1.00888e-27	5.92762e-26	down	0.202819	2.43281	22	343	GO:0036297;GO:0000775;GO:0030496;GO:0000278;GO:0005737;GO:0051233;GO:0005634;GO:0019901;GO:0000776;GO:0007059;	BP;CC;CC;BP;CC;CC;CC;MF;CC;BP;	interstrand cross-link repair;chromosome, centromeric region;midbody;mitotic cell cycle;cytoplasm;spindle midzone;nucleus;protein kinase binding;kinetochore;chromosome segregation;	-	-	-	FIGNL1-interacting regulator of recombination and mitosis isoform 3 [Homo sapiens]	-	-	FIGNL1-interacting regulator of recombination and mitosis OS=Rattus norvegicus OX=10116 GN=Firrm PE=2 SV=1	4MZN5	S	Domain of unknown function (DUF4487)	-	-	-	-	-	-	-	-	-	row-264
transcript:ENST00000440623	transcript:ENST00000440623	1.97263	2.59347	1.0876e-27	6.36616e-26	up	6.49371	1.05562	1021	217	-	-	-	-	-	-	sperm-specific antigen 2 isoform X3 [Pteropus alecto]	-	-	-	-	-	-	-	-	-	-	-	-	-	-	-	row-265
transcript:ENST00000454324	transcript:ENST00000454324	1.08865	-4.20594	1.17411e-27	6.8468e-26	down	0.146918	2.94365	11	263	GO:0032588;GO:0071579;GO:0005829;GO:0006829;GO:0006895;GO:0005739;GO:0008324;GO:0005794;GO:0015297;GO:1904257;GO:0005385;	CC;BP;CC;BP;BP;CC;MF;CC;MF;BP;MF;	trans-Golgi network membrane;regulation of zinc ion transport;cytosol;zinc ion transport;Golgi to endosome transport;mitochondrion;monoatomic cation transmembrane transporter activity;Golgi apparatus;antiporter activity;zinc ion import into Golgi lumen;zinc ion transmembrane transporter activity;	K14693	-	-	zinc transporter 6 [Pongo abelii]	-	-	Zinc transporter 6 OS=Homo sapiens OX=9606 GN=SLC30A6 PE=1 SV=2	4M6F2	P	Solute carrier family 30 (zinc transporter), member 6	-	-	-	-	KOG1484	[P]	Inorganic ion transport and metabolism;	Putative Zn2+ transporter MSC2 (cation diffusion facilitator superfamily)	-	row-266
transcript:ENST00000562084	transcript:ENST00000562084	2.14672	2.92068	1.19778e-27	6.95876e-26	up	8.41244	1.08329	455	77	-	-	-	-	-	-	-	-	-	-	-	-	-	-	-	-	-	-	-	-	-	-	row-267
transcript:ENST00000546604	transcript:ENST00000546604	2.47872	-3.08828	1.48029e-27	8.5681e-26	down	1.40413	11.9236	48	525	GO:0000346;GO:0016607;GO:0005654;GO:0000122;GO:0016973;GO:0003682;GO:0036464;GO:0003677;GO:0003723;GO:0034641;GO:0005634;GO:0006417;GO:0006406;	CC;CC;CC;BP;BP;MF;CC;MF;MF;BP;CC;BP;BP;	transcription export complex;nuclear speck;nucleoplasm;negative regulation of transcription by RNA polymerase II;poly(A)+ mRNA export from nucleus;chromatin binding;cytoplasmic ribonucleoprotein granule;DNA binding;RNA binding;obsolete cellular nitrogen compound metabolic process;nucleus;regulation of translation;mRNA export from nucleus;	K18732	-	-	SAP domain-containing ribonucleoprotein isoform X2 [Theropithecus gelada]	PF02037.31	SAP domain	SAP domain-containing ribonucleoprotein OS=Pongo abelii OX=9601 GN=SARNP PE=2 SV=3	4N4RJ	K	mRNA-containing ribonucleoprotein complex export from nucleus	-	-	-	-	KOG4259	[D]	Cell cycle control, cell division, chromosome partitioning;	Putative nucleic acid-binding protein Hcc-1/proliferation associated cytokine-inducible protein, contains SAP domain	-	row-268
transcript:ENST00000588732	transcript:ENST00000588732	1.86249	2.74739	1.55081e-27	8.94298e-26	up	6.03515	0.87957	618	118	GO:0035064;GO:0007549;GO:0051287;GO:0005654;GO:0003677;GO:0042393;GO:0005694;GO:0045815;GO:0048497;GO:0140463;GO:0006397;GO:0000786;GO:0140673;GO:0031491;GO:0016616;GO:0048510;GO:0003700;GO:0005634;GO:0016491;GO:0003682;GO:0009910;GO:0000785;GO:0050661;GO:0005829;GO:0030154;GO:0043481;GO:0005705;	MF;BP;MF;CC;MF;MF;CC;BP;BP;MF;BP;CC;BP;MF;MF;BP;MF;CC;MF;MF;BP;CC;MF;CC;BP;BP;CC;	methylated histone binding;sex-chromosome dosage compensation;NAD binding;nucleoplasm;DNA binding;histone binding;chromosome;transcription initiation-coupled chromatin remodeling;maintenance of floral organ identity;chromatin-protein adaptor activity;mRNA processing;nucleosome;transcription elongation-coupled chromatin remodeling;nucleosome binding;oxidoreductase activity, acting on the CH-OH gro…	-	-	-	cytokine-like nuclear factor N-PAC isoform X6 [Mirounga angustirostris]	PF00855.21	PWWP domain	Cytokine-like nuclear factor N-PAC OS=Gallus gallus OX=9031 GN=GLYR1 PE=2 SV=1	4JWU6	K	Glyoxylate reductase 1 homolog (Arabidopsis)	-	-	-	-	KOG1904	[K]	Transcription;	Transcription coactivator	-	row-269
transcript:ENST00000468065	transcript:ENST00000468065	0.521695	-10.0709	1.61483e-27	9.24371e-26	down	0	1.06106	0	151	GO:0042581;GO:0006508;GO:0001817;GO:0008542;GO:0034241;GO:0045121;GO:0033631;GO:0005912;GO:0004222;GO:0030336;GO:0002523;GO:0042117;GO:2000391;GO:0050729;GO:0030317;GO:0010954;GO:0005634;GO:0009897;GO:2000415;GO:0016020;GO:0043534;GO:0009986;GO:0030424;GO:0033089;GO:0010628;GO:0007249;GO:0005080;GO:0030335;GO:0051044;GO:0042542;GO:0051592;GO:0010042;GO:0005518;GO:0098609;GO:0043410;GO:0031902;GO:…	CC;BP;BP;BP;BP;CC;BP;CC;MF;BP;BP;BP;BP;BP;BP;BP;CC;CC;BP;CC;BP;CC;CC;BP;BP;BP;MF;BP;BP;BP;BP;BP;MF;BP;BP;CC;BP;BP;BP;BP;CC;BP;BP;BP;CC;MF;MF;BP;BP;CC;CC;BP;BP;BP;BP;CC;BP;CC;BP;BP;CC;BP;MF;BP;BP;BP;BP;CC;BP;MF;BP;BP;BP;BP;CC;BP;CC;BP;BP;BP;BP;BP;CC;CC;CC;CC;BP;BP;BP;BP;CC;BP;BP;CC;CC;BP;BP;BP;BP;MF;MF;BP;BP;BP;MF;BP;BP;MF;BP;BP;BP;BP;BP;CC;MF;BP;MF;BP;BP;BP;BP;MF;BP;BP;BP;CC;CC;BP;BP;MF;CC;BP;BP;…	specific granule;proteolysis;regulation of cytokine production;visual learning;positive regulation of macrophage fusion;membrane raft;cell-cell adhesion mediated by integrin;adherens junction;metalloendopeptidase activity;negative regulation of cell migration;leukocyte migration involved in inflammatory response;monocyte activation;positive regulation of neutrophil extravasation;positive regulati…	K06834	-	-	disintegrin and metalloproteinase domain-containing protein 9 precursor [Homo sapiens]	PF01421.23	Reprolysin (M12B) family zinc metalloprotease	Disintegrin and metalloproteinase domain-containing protein 9 OS=Homo sapiens OX=9606 GN=ADAM9 PE=1 SV=1	4N3Z0	O	ADAM cysteine-rich	-	-	-	-	KOG3607	[O]	Posttranslational modification, protein turnover, chaperones;	Meltrins, fertilins and related Zn-dependent metalloproteinases of the ADAMs family	-	row-270
transcript:ENST00000295984	transcript:ENST00000295984	0.563395	-10.0709	1.61483e-27	9.24371e-26	down	0	1.18372	0	151	GO:0016020;	CC;	membrane;	-	-	-	proline-rich transmembrane protein 3 isoform X1 [Homo sapiens]	-	-	Proline-rich transmembrane protein 3 OS=Homo sapiens OX=9606 GN=PRRT3 PE=1 SV=3	4MZQ0	S	transmembrane protein 3	-	-	-	-	-	-	-	-	-	row-271
transcript:ENST00000520626	transcript:ENST00000520626	0.794313	-4.1894	1.87686e-27	1.07043e-25	down	0.093185	1.75125	11	260	GO:0008083;GO:0006508;GO:0005125;GO:0008270;GO:0001501;GO:0005794;GO:0061036;GO:0062023;GO:0005615;GO:0004222;GO:0004252;GO:0001502;GO:0008233;GO:0031982;GO:0001503;GO:0005576;GO:0008237;GO:0051216;GO:0042802;GO:0016485;GO:0005509;GO:0009953;GO:0030154;GO:0030199;	MF;BP;MF;MF;BP;CC;BP;CC;CC;MF;MF;BP;MF;CC;BP;CC;MF;BP;MF;BP;MF;BP;BP;BP;	growth factor activity;proteolysis;cytokine activity;zinc ion binding;skeletal system development;Golgi apparatus;positive regulation of cartilage development;collagen-containing extracellular matrix;extracellular space;metalloendopeptidase activity;serine-type endopeptidase activity;cartilage condensation;peptidase activity;vesicle;ossification;extracellular region;metallopeptidase activity;cart…	K05502	-	-	bone morphogenetic protein 1 [Odocoileus virginianus texanus]	-	-	Bone morphogenetic protein 1 OS=Mus musculus OX=10090 GN=Bmp1 PE=1 SV=2	4927G	O	positive regulation of cartilage development	-	-	-	-	KOG3714	[O]	Posttranslational modification, protein turnover, chaperones;	Meprin A metalloprotease	-	row-272
transcript:ENST00000487078	transcript:ENST00000487078	2.07128	2.69321	2.23795e-27	1.27171e-25	up	7.35762	1.11325	696	138	GO:0015631;GO:0021549;GO:0021680;GO:0001754;GO:0043009;GO:0006508;GO:0051607;GO:0030425;GO:0005739;GO:0004181;GO:0035608;GO:0005730;GO:0008270;GO:0046872;GO:0005794;GO:0005814;GO:0002164;GO:0021772;GO:0004180;GO:0043231;GO:0060271;GO:0033077;GO:0015630;GO:0030496;GO:0035609;GO:0005737;GO:0018991;GO:0060041;GO:0035610;GO:0008233;GO:0043204;GO:0005634;GO:0120222;GO:0098957;GO:0016020;GO:0098930;GO:…	MF;BP;BP;BP;BP;BP;BP;CC;CC;MF;BP;CC;MF;MF;CC;CC;BP;BP;MF;CC;BP;BP;CC;CC;BP;CC;BP;BP;BP;MF;CC;CC;BP;BP;CC;BP;BP;MF;BP;BP;CC;BP;BP;BP;BP;CC;BP;CC;CC;CC;CC;BP;	tubulin binding;cerebellum development;cerebellar Purkinje cell layer development;eye photoreceptor cell differentiation;chordate embryonic development;proteolysis;defense response to virus;dendrite;mitochondrion;metallocarboxypeptidase activity;protein deglutamylation;nucleolus;zinc ion binding;metal ion binding;Golgi apparatus;centriole;larval development;olfactory bulb development;carboxypepti…	K23438	-	-	cytosolic carboxypeptidase-like protein 5 isoform X2 [Homo sapiens]	PF00246.28	Zinc carboxypeptidase	Cytosolic carboxypeptidase-like protein 5 OS=Homo sapiens OX=9606 GN=AGBL5 PE=1 SV=1	4MG8U	E	Zinc carboxypeptidase	COG2866	Murein tripeptide amidase MpaA	M	Cell wall/membrane/envelope biogenesis	KOG3641	[E]	Amino acid transport and metabolism;	Zinc carboxypeptidase	-	row-273
transcript:ENST00000548147	transcript:ENST00000548147	0.9917	-6.88361	3.27312e-27	1.85318e-25	down	0.005483	2.93268	1	168	-	-	-	-	-	-	KAT8 regulatory NSL complex subunit 2-like [Heterocephalus glaber]	-	-	-	-	-	-	-	-	-	-	-	-	-	-	-	row-274
transcript:ENST00000438321	transcript:ENST00000438321	0.42399	9.99998	4.32914e-27	2.43339e-25	up	0.799979	0	112	0	-	-	-	-	-	-	kinesin-like protein KIF15 isoform X2 [Homo sapiens]	PF14111.10	Domain of unknown function (DUF4283)	-	-	-	-	-	-	-	-	-	-	-	-	-	row-275
transcript:ENST00000428621	transcript:ENST00000428621	0.760628	9.99998	4.32914e-27	2.43339e-25	up	1.87041	0	112	0	-	-	-	-	-	-	clathrin heavy chain linker domain-containing protein 1 isoform 4 [Homo sapiens]	PF15739.9	Translin-associated factor X-interacting N-terminus	Clathrin heavy chain linker domain-containing protein 1 OS=Homo sapiens OX=9606 GN=CLHC1 PE=1 SV=3	4MV1E	U	Clathrin-H-link	-	-	-	-	KOG0985	[U]	Intracellular trafficking, secretion, and vesicular transport;	Vesicle coat protein clathrin, heavy chain	-	row-276
transcript:ENST00000424959	transcript:ENST00000424959	2.07798	-3.5895	6.08081e-27	3.40569e-25	down	0.763934	9.10621	21	326	GO:0016020;GO:0007595;GO:0140275;GO:0005743;GO:0001401;GO:0015031;GO:0005739;GO:0005737;GO:0045040;GO:0007005;GO:0007007;GO:0005741;	CC;BP;CC;CC;CC;BP;CC;CC;BP;BP;BP;CC;	membrane;lactation;MIB complex;mitochondrial inner membrane;SAM complex;protein transport;mitochondrion;cytoplasm;protein insertion into mitochondrial outer membrane;mitochondrion organization;inner mitochondrial membrane organization;mitochondrial outer membrane;	K17776	-	-	metaxin-1 [Halichoerus grypus]	PF10568.13	Outer mitochondrial membrane transport complex protein	Metaxin-1 OS=Macaca fascicularis OX=9541 GN=MTX1 PE=2 SV=1	4MDKQ	U	Metaxin 1	-	-	-	-	KOG3028	[U]	Intracellular trafficking, secretion, and vesicular transport;	Translocase of outer mitochondrial membrane complex, subunit TOM37/Metaxin 1	-	row-277
transcript:ENST00000416913	transcript:ENST00000416913	2.12615	-2.69251	7.00489e-27	3.90918e-25	down	1.20004	7.66242	112	930	GO:0016020;GO:0005769;	CC;CC;	membrane;early endosome;	K17562	-	-	LOW QUALITY PROTEIN: protein phosphatase 1 regulatory subunit 21-like [Saimiri boliviensis boliviensis]	PF10205.13	Predicted coiled-coil domain-containing protein	Protein phosphatase 1 regulatory subunit 21 OS=Homo sapiens OX=9606 GN=PPP1R21 PE=1 SV=1	4M6PE	S	Predicted coiled-coil domain-containing protein	-	-	-	-	KOG4421	[S]	Function unknown;	Uncharacterized conserved protein	-	row-278
transcript:ENST00000490904	transcript:ENST00000490904	0.446836	-6.00719	7.61512e-27	4.23107e-25	down	0.008281	0.842641	2	174	GO:0001890;GO:0000165;GO:0060718;GO:0046872;GO:0004672;GO:0010468;GO:0035556;GO:0048471;GO:0019100;GO:0010225;GO:0005737;GO:0106310;GO:0016310;GO:1900745;GO:0005524;GO:0043507;GO:0004709;GO:0051973;GO:0032212;GO:1904355;	BP;BP;BP;MF;MF;BP;BP;CC;BP;BP;CC;MF;BP;BP;MF;BP;MF;BP;BP;BP;	placenta development;MAPK cascade;chorionic trophoblast cell differentiation;metal ion binding;protein kinase activity;regulation of gene expression;intracellular signal transduction;perinuclear region of cytoplasm;male germ-line sex determination;response to UV-C;cytoplasm;protein serine kinase activity;phosphorylation;positive regulation of p38MAPK cascade;ATP binding;positive regulation of JUN…	K04428	ko04912;ko04010	GnRH signaling pathway;MAPK signaling pathway	mitogen-activated protein kinase kinase kinase 4 isoform X1 [Homo sapiens]	PF19431.3	MEKK4 N-terminal	Mitogen-activated protein kinase kinase kinase 4 OS=Homo sapiens OX=9606 GN=MAP3K4 PE=1 SV=2	4N10F	T	Mitogen-activated protein kinase kinase kinase 4	-	-	-	-	KOG4645	[T]	Signal transduction mechanisms;	MAPKKK (MAP kinase kinase kinase) SSK2 and related serine/threonine protein kinases	-	row-279
gene:ENSG00000006282	SPATA20	2.62986	2.5596	7.63603e-27	4.23107e-25	up	11.8889	1.97249	933	203	GO:0005975;GO:0005576;GO:0003824;GO:0007283;GO:0030154;	BP;CC;MF;BP;BP;	carbohydrate metabolic process;extracellular region;catalytic activity;spermatogenesis;cell differentiation;	-	-	-	spermatogenesis-associated protein 20 isoform 1 precursor [Homo sapiens]	PF03190.19	Protein of unknown function, DUF255	Spermatogenesis-associated protein 20 OS=Homo sapiens OX=9606 GN=SPATA20 PE=2 SV=3	4N2QQ	O	Protein of unknown function, DUF255	COG1331	Uncharacterized conserved protein YyaL, SSP411 family, contains thoiredoxin and six-hairpin glycosidase-like domains	R	General function prediction only	KOG2244	[R]	General function prediction only;	Highly conserved protein containing a thioredoxin domain	-	row-280
transcript:ENST00000564907	transcript:ENST00000564907	0.516601	-10.0125	1.34553e-26	7.42902e-25	down	0	1.04656	0	145	-	-	-	-	-	-	-	-	-	-	-	-	-	-	-	-	-	-	-	-	-	-	row-281
gene:ENSG00000257529	RPL36A-HNRNPH2	4.92864	-2.50607	2.36818e-26	1.30292e-24	down	12.2924	68.7806	204	1488	GO:0043009;GO:0098793;GO:0006412;GO:0008270;GO:0098556;GO:0005783;GO:0022626;GO:0005886;GO:0005840;GO:0046898;GO:0002181;GO:0005737;GO:0042788;GO:0003723;GO:0010033;GO:0005634;GO:0015934;GO:0022625;GO:0098794;GO:1990904;GO:0045202;GO:0046677;GO:0140242;GO:0003735;GO:0005829;GO:0070180;GO:0032526;GO:0051726;GO:0140236;	BP;CC;BP;MF;CC;CC;CC;CC;CC;BP;BP;CC;CC;MF;BP;CC;CC;CC;CC;CC;CC;BP;BP;MF;CC;MF;BP;BP;BP;	chordate embryonic development;presynapse;translation;zinc ion binding;cytoplasmic side of rough endoplasmic reticulum membrane;endoplasmic reticulum;cytosolic ribosome;plasma membrane;ribosome;response to cycloheximide;cytoplasmic translation;cytoplasm;obsolete polysomal ribosome;RNA binding;obsolete response to organic substance;nucleus;large ribosomal subunit;cytosolic large ribosomal subunit;…	K02929	ko03010	Ribosome	RPL36A-HNRNPH2 protein isoform a [Homo sapiens]	PF00935.23	Ribosomal protein L44	Large ribosomal subunit protein eL42 OS=Rattus norvegicus OX=10116 GN=Rpl36a PE=1 SV=2	4MY82	J	structural constituent of ribosome	COG1631	Ribosomal protein L44E	J	Translation, ribosomal structure and biogenesis	KOG3464	[J]	Translation, ribosomal structure and biogenesis;	60S ribosomal protein L44	-	row-282
transcript:ENST00000440761	transcript:ENST00000440761	1.04726	4.67486	3.85582e-26	2.11391e-24	up	2.89924	0.095296	142	7	GO:0120197;GO:0015631;GO:0046872;GO:0007288;GO:0018095;GO:0030317;GO:0005737;GO:0000226;GO:0120222;GO:0005576;GO:0035082;GO:0070740;GO:0005524;GO:0002395;GO:0021702;GO:0005929;GO:0036211;GO:0005829;GO:0005874;GO:0003351;GO:0031514;GO:0036064;	BP;MF;MF;BP;BP;BP;CC;BP;BP;CC;BP;MF;MF;BP;BP;CC;BP;CC;CC;BP;CC;CC;	mucociliary clearance;tubulin binding;metal ion binding;sperm axoneme assembly;protein polyglutamylation;flagellated sperm motility;cytoplasm;microtubule cytoskeleton organization;regulation of blastocyst development;extracellular region;axoneme assembly;tubulin-glutamic acid ligase activity;ATP binding;immune response in nasopharyngeal-associated lymphoid tissue;cerebellar Purkinje cell differen…	K16599	-	-	PREDICTED: probable tubulin polyglutamylase TTLL1 [Condylura cristata]	-	-	Polyglutamylase complex subunit TTLL1 OS=Homo sapiens OX=9606 GN=TTLL1 PE=1 SV=1	4MF2G	O	Tubulin tyrosine ligase-like family, member 1	-	-	-	-	KOG2157	[O]	Posttranslational modification, protein turnover, chaperones;	Predicted tubulin-tyrosine ligase	-	row-283
transcript:ENST00000382214	transcript:ENST00000382214	0.616644	-9.97218	3.95088e-26	2.15088e-24	down	0	1.35102	0	141	GO:0060546;GO:0010803;GO:0030425;GO:0003690;GO:0033209;GO:0046872;GO:0004842;GO:0050852;GO:0071797;GO:0045944;GO:0044877;GO:0050728;GO:0043161;GO:1990757;GO:0000209;GO:0043130;GO:0016740;GO:0032088;GO:0008544;GO:0140311;GO:0042742;GO:0097039;GO:2000348;GO:0071600;GO:0045202;GO:0030674;GO:0042802;GO:1901224;GO:0048701;GO:0007005;GO:0005080;GO:0043065;GO:0031424;GO:2001238;GO:0031593;GO:0005829;GO:…	BP;BP;CC;MF;BP;MF;MF;BP;CC;BP;MF;BP;BP;MF;BP;MF;MF;BP;BP;MF;BP;BP;BP;BP;CC;MF;MF;BP;BP;BP;MF;BP;BP;BP;MF;CC;MF;BP;BP;BP;BP;	negative regulation of necroptotic process;regulation of tumor necrosis factor-mediated signaling pathway;dendrite;double-stranded DNA binding;tumor necrosis factor-mediated signaling pathway;metal ion binding;ubiquitin-protein transferase activity;T cell receptor signaling pathway;LUBAC complex;positive regulation of transcription by RNA polymerase II;protein-containing complex binding;negative …	K10630	ko04217;ko04621	Necroptosis;NOD-like receptor signaling pathway	ranBP-type and C3HC4-type zinc finger-containing protein 1 isoform X4 [Pongo pygmaeus]	PF00641.22	Zn-finger in Ran binding protein and others	RanBP-type and C3HC4-type zinc finger-containing protein 1 OS=Homo sapiens OX=9606 GN=RBCK1 PE=1 SV=2	4N3UD	O	IBR domain, a half RING-finger domain	-	-	-	-	KOG1815	[O]	Posttranslational modification, protein turnover, chaperones;	Predicted E3 ubiquitin ligase	-	row-284
transcript:ENST00000451850	transcript:ENST00000451850	0.565542	-9.97218	3.95088e-26	2.15088e-24	down	0	1.19023	0	141	GO:0005829;GO:0004014;GO:0006595;GO:0042802;GO:0008295;GO:0019810;GO:0006597;GO:0046500;	CC;MF;BP;MF;BP;MF;BP;BP;	cytosol;adenosylmethionine decarboxylase activity;polyamine metabolic process;identical protein binding;spermidine biosynthetic process;putrescine binding;spermine biosynthetic process;S-adenosylmethionine metabolic process;	K01611	ko00330;ko00270;ko01100	Arginine and proline metabolism;Cysteine and methionine metabolism;Metabolic pathways	S-adenosylmethionine decarboxylase proenzyme-like isoform X3 [Carlito syrichta]	PF01536.20	Adenosylmethionine decarboxylase	S-adenosylmethionine decarboxylase proenzyme OS=Homo sapiens OX=9606 GN=AMD1 PE=1 SV=2	4J6AT	T	S-adenosylmethionine decarboxylase	-	-	-	-	KOG0788	[T]	Signal transduction mechanisms;	S-adenosylmethionine decarboxylase	-	row-285
transcript:ENST00000557348	transcript:ENST00000557348	3.90406	2.41643	4.0699e-26	2.20796e-24	up	31.7414	5.84516	1527	367	GO:0070062;GO:0016597;GO:0009113;GO:0005743;GO:0006730;GO:0006545;GO:0005739;GO:0008270;GO:0035999;GO:0005886;GO:0048027;GO:0006565;GO:0005759;GO:0046655;GO:0002082;GO:0006564;GO:0009506;GO:0007623;GO:0030170;GO:0015630;GO:0005737;GO:0008732;GO:1901149;GO:0005634;GO:0070536;GO:0006544;GO:0051289;GO:0010197;GO:0046653;GO:0042802;GO:0003682;GO:0009555;GO:0042803;GO:0000900;GO:0034340;GO:0070905;GO:…	CC;MF;BP;CC;BP;BP;CC;MF;BP;CC;MF;BP;CC;BP;BP;BP;CC;BP;MF;CC;CC;MF;MF;CC;BP;BP;BP;BP;BP;MF;MF;BP;MF;MF;BP;MF;BP;CC;CC;CC;MF;BP;BP;BP;BP;BP;	extracellular exosome;amino acid binding;purine nucleobase biosynthetic process;mitochondrial inner membrane;one-carbon metabolic process;glycine biosynthetic process;mitochondrion;zinc ion binding;tetrahydrofolate interconversion;plasma membrane;mRNA 5'-UTR binding;L-serine catabolic process;mitochondrial matrix;folic acid metabolic process;regulation of oxidative phosphorylation;L-serine biosyn…	K00600	ko00630;ko01523;ko01100;ko01230;ko00260;ko00670;ko01200	Glyoxylate and dicarboxylate metabolism;Antifolate resistance;Metabolic pathways;Biosynthesis of amino acids;Glycine, serine and threonine metabolism;One carbon pool by folate;Carbon metabolism	serine hydroxymethyltransferase, mitochondrial isoform X3 [Pongo abelii]	PF00464.23	Serine hydroxymethyltransferase	Serine hydroxymethyltransferase, mitochondrial OS=Homo sapiens OX=9606 GN=SHMT2 PE=1 SV=3	4N1SP	H	Serine hydroxymethyltransferase	-	-	-	-	KOG2467	[E]	Amino acid transport and metabolism;	Glycine/serine hydroxymethyltransferase	-	row-286
transcript:ENST00000508155	transcript:ENST00000508155	0.855044	9.93416	4.11777e-26	2.21846e-24	up	2.27181	0	107	0	GO:0019899;GO:0035198;GO:0005654;GO:0005730;GO:0003725;GO:0042802;GO:0008270;GO:0005737;GO:0003677;GO:0003723;GO:0005634;GO:0043065;	MF;MF;CC;CC;MF;MF;MF;CC;MF;MF;CC;BP;	enzyme binding;miRNA binding;nucleoplasm;nucleolus;double-stranded RNA binding;identical protein binding;zinc ion binding;cytoplasm;DNA binding;RNA binding;nucleus;positive regulation of apoptotic process;	K26542	-	-	zinc finger protein 346 isoform d [Homo sapiens]	PF12874.11	Zinc-finger of C2H2 type	Zinc finger protein 346 OS=Homo sapiens OX=9606 GN=ZNF346 PE=1 SV=1	4MY6U	A	Zinc finger protein	-	-	-	-	-	-	-	-	-	row-287
MSTRG.10602.1	MSTRG.10602.1	0.68492	9.93416	4.11777e-26	2.21846e-24	up	1.58442	0	107	0	GO:0003723;GO:0003964;GO:0006310;GO:0032197;GO:0004519;GO:0046872;GO:0090304;GO:0009036;	MF;MF;BP;BP;MF;MF;BP;MF;	RNA binding;RNA-directed DNA polymerase activity;DNA recombination;retrotransposition;endonuclease activity;metal ion binding;nucleic acid metabolic process;type II site-specific deoxyribonuclease activity;	-	-	-	LINE-1 retrotransposable element ORF2 protein [Pan paniscus]	PF11488.12	Transcriptional regulatory protein LGE1	LINE-1 retrotransposable element ORF2 protein OS=Homo sapiens OX=9606 PE=1 SV=1	33REW	-	-	-	-	-	-	-	-	-	-	-	row-288
transcript:ENST00000450272	transcript:ENST00000450272	2.09541	2.85902	4.63341e-26	2.48766e-24	up	7.87644	1.05742	419	74	GO:0070062;GO:0097172;GO:0005829;GO:0160047;GO:0045127;GO:0005524;GO:0045087;GO:0006044;GO:0006051;GO:0009254;GO:0019262;GO:0046835;GO:0005737;GO:0042742;GO:0070434;GO:0009384;GO:0032495;GO:0019200;	CC;BP;CC;MF;MF;MF;BP;BP;BP;BP;BP;BP;CC;BP;BP;MF;BP;MF;	extracellular exosome;N-acetylmuramic acid metabolic process;cytosol;muramyl dipeptide kinase activity;N-acetylglucosamine kinase activity;ATP binding;innate immune response;N-acetylglucosamine metabolic process;N-acetylmannosamine metabolic process;peptidoglycan turnover;N-acetylneuraminate catabolic process;carbohydrate phosphorylation;cytoplasm;defense response to bacterium;positive regulation…	K00884	ko00520;ko01100	Amino sugar and nucleotide sugar metabolism;Metabolic pathways	N-acetyl-D-glucosamine kinase isoform X1 [Homo sapiens]	PF01869.24	BadF/BadG/BcrA/BcrD ATPase family	N-acetyl-D-glucosamine kinase OS=Homo sapiens OX=9606 GN=NAGK PE=1 SV=4	4MZXT	G	BadF/BadG/BcrA/BcrD ATPase family	COG2971	BadF-type ATPase, related to human N-acetylglucosamine kinase	G	Carbohydrate transport and metabolism	KOG1794	[G]	Carbohydrate transport and metabolism;	N-Acetylglucosamine kinase	-	row-289
transcript:ENST00000508404	transcript:ENST00000508404	0.961681	-5.948	5.17476e-26	2.76876e-24	down	0.037972	2.6543	2	167	GO:0033106;GO:0032588;GO:0006874;GO:0043231;GO:0032468;GO:0006828;GO:0000139;GO:0005384;GO:0035751;GO:0032472;GO:0005765;GO:0006487;GO:0005794;GO:0015297;GO:0006816;GO:0070588;GO:0010008;GO:0071421;GO:0015085;	CC;CC;BP;CC;BP;BP;CC;MF;BP;BP;CC;BP;CC;MF;BP;BP;CC;BP;MF;	cis-Golgi network membrane;trans-Golgi network membrane;intracellular calcium ion homeostasis;intracellular membrane-bounded organelle;Golgi calcium ion homeostasis;manganese ion transport;Golgi membrane;manganese ion transmembrane transporter activity;regulation of lysosomal lumen pH;Golgi calcium ion transport;lysosomal membrane;protein N-linked glycosylation;Golgi apparatus;antiporter activity…	K23541	-	-	transmembrane protein 165 isoform X1 [Pan troglodytes]	-	-	Putative divalent cation/proton antiporter TMEM165 OS=Homo sapiens OX=9606 GN=TMEM165 PE=1 SV=1	4N2PP	U	Transmembrane protein 165	-	-	-	-	KOG2881	[S]	Function unknown;	Predicted membrane protein	-	row-290
gene:ENSG00000162869	PPP1R21	2.10222	2.59985	6.56787e-26	3.50211e-24	up	7.41333	1.19127	676	143	GO:0016020;GO:0005769;	CC;CC;	membrane;early endosome;	K17562	-	-	protein phosphatase 1 regulatory subunit 21 isoform 1 [Homo sapiens]	PF10212.13	Protein phosphatase 1 regulatory subunit 21, six-helix bundle	Protein phosphatase 1 regulatory subunit 21 OS=Homo sapiens OX=9606 GN=PPP1R21 PE=1 SV=1	4MWWU	S	Predicted coiled-coil domain-containing protein	-	-	-	-	KOG4421	[S]	Function unknown;	Uncharacterized conserved protein	-	row-291
transcript:ENST00000525243	transcript:ENST00000525243	1.22056	9.90697	8.82606e-26	4.69016e-24	up	4.43064	0	105	0	GO:0040039;GO:0016567;GO:0033017;GO:0000139;GO:0016740;GO:0061630;GO:0046872;GO:0005789;GO:0030433;	BP;BP;CC;CC;MF;MF;MF;CC;BP;	inductive cell migration;protein ubiquitination;sarcoplasmic reticulum membrane;Golgi membrane;transferase activity;ubiquitin protein ligase activity;metal ion binding;endoplasmic reticulum membrane;obsolete ubiquitin-dependent ERAD pathway;	K15698	-	-	PREDICTED: RING finger protein 121 [Cercocebus atys]	-	-	E3 ubiquitin ligase RNF121 OS=Homo sapiens OX=9606 GN=RNF121 PE=1 SV=1	493E9	O	endoplasmic reticulum unfolded protein response	-	-	-	-	KOG1734	[O]	Posttranslational modification, protein turnover, chaperones;	Predicted RING-containing E3 ubiquitin ligase	-	row-292
gene:ENSG00000246203	gene:ENSG00000246203	0.679243	-6.78599	8.89509e-26	4.71077e-24	down	0.012652	1.53212	1	157	GO:0001650;GO:0005654;GO:0016604;GO:0005730;GO:0003714;GO:0030183;GO:0003712;GO:0045892;GO:0005737;GO:0006355;GO:0030154;GO:0005634;GO:0051726;GO:0008283;	CC;CC;CC;CC;MF;BP;MF;BP;CC;BP;BP;CC;BP;BP;	fibrillar center;nucleoplasm;nuclear body;nucleolus;transcription corepressor activity;B cell differentiation;transcription coregulator activity;negative regulation of DNA-templated transcription;cytoplasm;regulation of DNA-templated transcription;cell differentiation;nucleus;regulation of cell cycle;cell population proliferation;	K23803	-	-	YY1-associated protein 1 isoform 9 [Homo sapiens]	PF20849.1	Protelomerase, muzzle domain	YY1-associated protein 1 OS=Homo sapiens OX=9606 GN=YY1AP1 PE=1 SV=2	4N64Q	K	YY1 associated protein 1	-	-	-	-	-	-	-	-	-	row-293
gene:ENSG00000261732	gene:ENSG00000261732	0.649521	-4.24142	1.29189e-25	6.78915e-24	down	0.157258	1.12628	9	221	GO:0003682;GO:0007389;GO:0003677;GO:0006355;GO:0005634;GO:0007379;	MF;BP;MF;BP;CC;BP;	chromatin binding;pattern specification process;DNA binding;regulation of DNA-templated transcription;nucleus;segment specification;	-	-	-	protein cramped-like isoform X4 [Macaca nemestrina]	-	-	Protein cramped-like OS=Homo sapiens OX=9606 GN=CRAMP1 PE=1 SV=3	4J4HJ	K	Cramped chromatin regulator homolog 1	-	-	-	-	-	-	-	-	-	row-294
transcript:ENST00000612051	transcript:ENST00000612051	0.744961	9.89317	1.29504e-25	6.78915e-24	up	1.80874	0	104	0	-	-	-	-	-	-	NF-kappa-B essential modulator isoform b [Homo sapiens]	-	-	-	4N3YM	K	Leucine zipper of domain CC2 of NEMO, NF-kappa-B essential modulator	-	-	-	-	-	-	-	-	-	row-295
MSTRG.1954.3	MSTRG.1954.3	0.473455	9.89317	1.29504e-25	6.78915e-24	up	0.92774	0	104	0	-	-	-	-	-	-	putative uncharacterized protein FLJ92257 [Pan troglodytes]	PF15788.9	Domain of unknown function (DUF4705)	Putative uncharacterized protein FLJ44672 OS=Homo sapiens OX=9606 PE=2 SV=1	4N7Z9	S	Domain of unknown function (DUF4705)	-	-	-	-	-	-	-	-	-	row-296
MSTRG.3463.4	MSTRG.3463.4	2.75875	2.44685	1.43291e-25	7.48673e-24	up	12.8232	2.31378	1088	256	GO:0071353;GO:0042277;GO:0010269;GO:0005634;GO:0071320;GO:0022625;GO:0014069;GO:0140242;GO:0016020;GO:1990904;GO:0036464;GO:0005829;GO:0098794;GO:0005925;GO:0045202;GO:0006412;GO:0070180;GO:0070062;GO:1904628;GO:0003723;GO:0007595;GO:0005737;GO:0002181;GO:1904401;GO:0030425;GO:0005840;GO:0005783;GO:0003735;GO:0140236;GO:0098793;GO:0022626;GO:0042254;	BP;MF;BP;CC;BP;CC;CC;BP;CC;CC;CC;CC;CC;CC;CC;BP;MF;CC;BP;MF;BP;CC;BP;BP;CC;CC;CC;MF;BP;CC;CC;BP;	cellular response to interleukin-4;peptide binding;response to selenium ion;nucleus;cellular response to cAMP;cytosolic large ribosomal subunit;postsynaptic density;translation at postsynapse;membrane;ribonucleoprotein complex;cytoplasmic ribonucleoprotein granule;cytosol;postsynapse;focal adhesion;synapse;translation;large ribosomal subunit rRNA binding;extracellular exosome;cellular response to…	-	hsa03010	Ribosome	60S acidic ribosomal protein P0-like [Pan troglodytes]	PF17777.5	Insertion domain in 60S ribosomal protein L10P	Large ribosomal subunit protein uL10 OS=Bos taurus OX=9913 GN=RPLP0 PE=2 SV=3	4MBFC	J	Ribosomal protein L10	COG0244	Ribosomal protein L10	J	Translation, ribosomal structure and biogenesis	KOG0815	[J]	Translation, ribosomal structure and biogenesis;	60S acidic ribosomal protein P0	-	row-297
transcript:ENST00000576724	transcript:ENST00000576724	1.16603	5.50487	1.69185e-25	8.81007e-24	up	3.76556	0.056587	111	3	GO:0032480;GO:0140313;GO:0005634;GO:0005829;GO:0005654;GO:0034097;GO:0005739;GO:0008270;GO:0005737;GO:0046872;GO:0035456;GO:0045824;GO:0006915;GO:0031333;	BP;MF;CC;CC;CC;BP;CC;MF;CC;MF;BP;BP;BP;BP;	negative regulation of type I interferon production;molecular sequestering activity;nucleus;cytosol;nucleoplasm;response to cytokine;mitochondrion;zinc ion binding;cytoplasm;metal ion binding;response to interferon-beta;negative regulation of innate immune response;apoptotic process;negative regulation of protein-containing complex assembly;	-	-	-	XIAP-associated factor 1 isoform 1 [Homo sapiens]	PF21366.1	TRAFD1/XAF1, zinc finger	XIAP-associated factor 1 OS=Homo sapiens OX=9606 GN=XAF1 PE=1 SV=1	4MSNJ	K	XIAP associated factor 1	-	-	-	-	-	-	-	-	-	row-298
gene:ENSG00000259075	POC1B-GALNT4	0.437142	-5.91305	1.89423e-25	9.83108e-24	down	0.024809	0.788722	2	163	GO:0070062;GO:0005796;GO:0033116;GO:0031985;GO:0007220;GO:0000922;GO:0033363;GO:0046872;GO:0007368;GO:0005794;GO:0030246;GO:0006493;GO:0008593;GO:0070278;GO:0033628;GO:0030145;GO:0051047;GO:0005783;GO:0005814;GO:0048471;GO:0005975;GO:0007099;GO:0019082;GO:0061314;GO:0009312;GO:0060271;GO:0005795;GO:0005112;GO:0005737;GO:0018242;GO:0030030;GO:0004653;GO:0016020;GO:0005576;GO:0008543;GO:0031589;GO:…	CC;CC;CC;CC;BP;CC;BP;MF;BP;CC;MF;BP;BP;BP;BP;MF;BP;CC;CC;CC;BP;BP;BP;BP;BP;BP;CC;MF;CC;BP;BP;MF;CC;CC;BP;BP;CC;CC;CC;MF;BP;CC;MF;MF;BP;BP;CC;BP;CC;BP;BP;CC;BP;BP;CC;BP;CC;BP;	extracellular exosome;Golgi lumen;endoplasmic reticulum-Golgi intermediate compartment membrane;Golgi cisterna;Notch receptor processing;spindle pole;secretory granule organization;metal ion binding;determination of left/right symmetry;Golgi apparatus;carbohydrate binding;protein O-linked glycosylation;regulation of Notch signaling pathway;extracellular matrix constituent secretion;regulation of …	K00710	ko00512;ko01100	Mucin type O-glycan biosynthesis;Metabolic pathways	POC1B-GALNT4 protein isoform 1 [Homo sapiens]	PF00535.30	Glycosyl transferase family 2	Polypeptide N-acetylgalactosaminyltransferase 4 OS=Homo sapiens OX=9606 GN=GALNT4 PE=1 SV=2	4MC68	O	Polypeptide N-acetylgalactosaminyltransferase 4	COG1216	Glycosyltransferase, GT2 family	G	Carbohydrate transport and metabolism	KOG3736	[O]	Posttranslational modification, protein turnover, chaperones;	Polypeptide N-acetylgalactosaminyltransferase	-	row-299
transcript:ENST00000585841	transcript:ENST00000585841	0.906178	9.87925	1.90304e-25	9.84396e-24	up	2.51216	0	103	0	GO:0008307;GO:0060048;GO:0030016;GO:0042098;GO:1903076;GO:0045296;GO:0060537;GO:0045944;GO:0045663;GO:0007279;GO:1903920;GO:0043426;GO:0010033;GO:0061629;GO:0005634;GO:0016709;GO:0042593;GO:0005819;GO:0051179;GO:0016491;GO:0031433;GO:0030036;GO:0007519;GO:0035995;GO:0005916;GO:0071236;GO:0005856;GO:0090543;GO:0008092;GO:0007507;GO:0005654;GO:0045662;GO:0008270;GO:0005938;GO:0008630;GO:0010043;GO:…	MF;BP;CC;BP;BP;MF;BP;BP;BP;BP;BP;MF;BP;MF;CC;MF;BP;CC;BP;MF;MF;BP;BP;BP;CC;BP;CC;CC;MF;BP;CC;BP;MF;CC;BP;BP;CC;CC;CC;BP;BP;BP;CC;MF;CC;BP;BP;MF;MF;BP;CC;CC;MF;BP;MF;BP;BP;BP;CC;BP;BP;MF;CC;BP;BP;BP;BP;CC;BP;BP;BP;CC;BP;MF;CC;BP;BP;MF;BP;CC;CC;BP;MF;CC;CC;BP;BP;CC;CC;BP;MF;CC;MF;BP;BP;MF;BP;MF;MF;BP;BP;MF;CC;BP;BP;BP;CC;BP;BP;MF;BP;BP;BP;CC;	structural constituent of muscle;cardiac muscle contraction;myofibril;T cell proliferation;regulation of protein localization to plasma membrane;cadherin binding;muscle tissue development;positive regulation of transcription by RNA polymerase II;positive regulation of myoblast differentiation;pole cell formation;positive regulation of actin filament severing;MRF binding;obsolete response to organ…	K24420	-	-	LIM and SH3 domain protein 1 [Nycticebus coucang]	PF00412.26	LIM domain	LIM and SH3 domain protein 1 OS=Homo sapiens OX=9606 GN=LASP1 PE=1 SV=2	4Q36I	Z	LIM and SH3 domain protein 1	-	-	-	-	KOG1702	[Z]	Cytoskeleton;	Nebulin repeat protein	-	row-300
transcript:ENST00000530721	transcript:ENST00000530721	3.78894	-2.59856	2.14055e-25	1.10359e-23	down	5.07129	30.4693	118	918	GO:0006284;GO:0071159;GO:0004520;GO:0006412;GO:0000278;GO:0022627;GO:0022626;GO:0005840;GO:0032357;GO:0006407;GO:0019899;GO:0044877;GO:0006974;GO:0034614;GO:0005844;GO:0005634;GO:0017148;GO:0005819;GO:0016020;GO:0014069;GO:0010628;GO:0071356;GO:0051879;GO:0003735;GO:0045335;GO:0072686;GO:0050862;GO:0005654;GO:0032743;GO:0005783;GO:0015935;GO:0008534;GO:0042104;GO:0031334;GO:0008017;GO:0005737;GO:…	BP;CC;MF;BP;BP;CC;CC;CC;MF;BP;MF;MF;BP;BP;CC;CC;BP;CC;CC;CC;BP;BP;MF;MF;CC;CC;BP;CC;BP;CC;CC;MF;BP;BP;MF;CC;BP;CC;CC;BP;CC;CC;BP;BP;BP;BP;BP;MF;BP;CC;CC;CC;CC;CC;CC;CC;CC;CC;BP;MF;BP;MF;BP;BP;BP;CC;BP;CC;MF;CC;CC;MF;MF;MF;MF;MF;BP;BP;MF;BP;CC;BP;CC;MF;MF;BP;BP;MF;MF;BP;CC;CC;MF;CC;CC;BP;CC;BP;BP;BP;MF;BP;BP;MF;MF;CC;	base-excision repair;NF-kappaB complex;DNA endonuclease activity;translation;mitotic cell cycle;cytosolic small ribosomal subunit;cytosolic ribosome;ribosome;oxidized purine DNA binding;obsolete rRNA export from nucleus;enzyme binding;protein-containing complex binding;DNA damage response;cellular response to reactive oxygen species;obsolete polysome;nucleus;negative regulation of translation;spi…	K02985	ko03010	Ribosome	40S ribosomal protein S3-like [Aotus nancymaae]	-	-	Small ribosomal subunit protein uS3 OS=Rattus norvegicus OX=10116 GN=Rps3 PE=1 SV=1	4Q0JR	J	oxidized purine nucleobase lesion DNA N-glycosylase activity	-	-	-	-	KOG3181	[J]	Translation, ribosomal structure and biogenesis;	40S ribosomal protein S3	-	row-301
transcript:ENST00000510106	transcript:ENST00000510106	1.99666	-3.69698	2.64144e-25	1.35734e-23	down	0.650074	8.65169	16	268	GO:0030951;GO:0007409;GO:0001764;GO:1902018;GO:0035173;GO:0006913;GO:0008542;GO:1903076;GO:0099509;GO:0000278;GO:0048812;GO:1904810;GO:0045944;GO:0044877;GO:1902017;GO:0006974;GO:0090314;GO:0051966;GO:0034352;GO:0030030;GO:0010033;GO:0006366;GO:0005634;GO:0048491;GO:2000045;GO:0097472;GO:0016020;GO:0030424;GO:0007089;GO:0014069;GO:0007519;GO:0051402;GO:0000079;GO:0007005;GO:0048488;GO:1904646;GO:…	BP;BP;BP;BP;MF;BP;BP;BP;BP;BP;BP;BP;BP;MF;BP;BP;BP;BP;BP;BP;BP;BP;CC;BP;BP;MF;CC;CC;BP;CC;BP;BP;BP;BP;BP;BP;MF;MF;BP;BP;BP;BP;BP;BP;BP;BP;CC;BP;BP;BP;MF;CC;BP;BP;CC;BP;CC;BP;CC;CC;BP;BP;BP;BP;CC;BP;BP;MF;BP;CC;CC;CC;BP;BP;BP;BP;MF;BP;MF;BP;BP;BP;BP;BP;BP;BP;BP;BP;CC;CC;BP;BP;BP;BP;BP;CC;BP;BP;BP;CC;CC;CC;BP;BP;BP;MF;CC;BP;MF;BP;BP;BP;CC;BP;CC;BP;MF;CC;CC;BP;CC;CC;BP;BP;BP;BP;BP;MF;BP;MF;BP;BP;MF;…	establishment or maintenance of microtubule cytoskeleton polarity;axonogenesis;neuron migration;negative regulation of cilium assembly;histone kinase activity;nucleocytoplasmic transport;visual learning;regulation of protein localization to plasma membrane;regulation of presynaptic cytosolic calcium ion concentration;mitotic cell cycle;neuron projection morphogenesis;negative regulation of dense …	K02202	ko03420;ko03022;ko04110	Nucleotide excision repair;Basal transcription factors;Cell cycle	cyclin-dependent kinase 7-like isoform X3 [Halichoerus grypus]	PF00069.29	Protein kinase domain	Cyclin-dependent kinase 7 OS=Homo sapiens OX=9606 GN=CDK7 PE=1 SV=1	KOG0659	H	Belongs to the protein kinase superfamily	-	-	-	-	KOG0659	[DKL]	Cell cycle control, cell division, chromosome partitioning; Transcription; Replication, recombination and repair;	Cdk activating kinase (CAK)/RNA polymerase II transcription initiation/nucleotide excision repair factor TFIIH/TFIIK, kinase subunit CDK7	-	row-302
transcript:ENST00000615986	transcript:ENST00000615986	0.754071	9.86519	2.8007e-25	1.43444e-23	up	1.84443	0	102	0	GO:0007507;GO:0005743;GO:0060048;GO:0032577;GO:0005739;GO:0042775;GO:0048137;GO:0005783;GO:0005794;GO:0042407;GO:0003007;GO:0005886;GO:0048738;GO:0006936;GO:2001171;GO:0031966;GO:0032981;GO:0003841;GO:0071617;GO:0007007;GO:0005741;GO:1900210;GO:0008654;GO:0045823;GO:0032049;GO:0035965;GO:0000423;GO:0046471;GO:0001947;GO:0008374;GO:0030097;GO:0007519;GO:0006650;GO:0007005;GO:0005789;GO:0006644;GO:…	BP;CC;BP;MF;CC;BP;BP;CC;CC;BP;BP;CC;BP;BP;BP;CC;BP;MF;MF;BP;CC;BP;BP;BP;BP;BP;BP;BP;BP;MF;BP;BP;BP;BP;CC;BP;BP;BP;MF;BP;CC;MF;	heart development;mitochondrial inner membrane;cardiac muscle contraction;phosphatidylcholine:cardiolipin O-linoleoyltransferase activity;mitochondrion;mitochondrial ATP synthesis coupled electron transport;spermatocyte division;endoplasmic reticulum;Golgi apparatus;cristae formation;heart morphogenesis;plasma membrane;cardiac muscle tissue development;muscle contraction;positive regulation of AT…	K13511	ko00564	Glycerophospholipid metabolism	tafazzin isoform X7 [Homo sapiens]	PF01553.25	Acyltransferase	Tafazzin OS=Homo sapiens OX=9606 GN=TAFAZZIN PE=1 SV=2	4MY9J	C	cardiolipin acyl-chain remodeling	-	-	-	-	KOG2847	[I]	Lipid transport and metabolism;	Phosphate acyltransferase	-	row-303
MSTRG.19536.2	MSTRG.19536.2	0.420474	-5.87724	5.0675e-25	2.58692e-23	down	0.009555	0.774274	2	159	-	-	-	-	-	-	-	-	-	-	-	-	-	-	-	-	-	-	-	-	-	-	row-304
transcript:ENST00000598987	transcript:ENST00000598987	1.92751	3.20858	6.39522e-25	3.25404e-23	up	7.2409	0.755913	253	35	-	-	-	-	-	-	very-long-chain enoyl-CoA reductase isoform X1 [Homo sapiens]	-	-	-	-	-	-	-	-	-	-	-	-	-	-	-	row-305
gene:ENSG00000128284	APOL3	0.990342	4.40218	6.59138e-25	3.34293e-23	up	2.2348	0.220105	134	8	GO:0005788;GO:0006953;GO:0005319;GO:0008289;GO:0008035;GO:0005615;GO:0043231;GO:0006954;GO:0005737;GO:0005254;GO:0051838;GO:0005576;GO:0016020;GO:0006629;GO:0034364;GO:0005789;GO:0006869;GO:0060135;GO:0042157;GO:0008203;GO:0072562;GO:1902476;GO:0045087;GO:0005102;GO:0043123;GO:0034361;	CC;BP;MF;MF;MF;CC;CC;BP;CC;MF;BP;CC;CC;BP;CC;CC;BP;BP;BP;BP;CC;BP;BP;MF;BP;CC;	endoplasmic reticulum lumen;acute-phase response;lipid transporter activity;lipid binding;high-density lipoprotein particle binding;extracellular space;intracellular membrane-bounded organelle;inflammatory response;cytoplasm;chloride channel activity;cytolysis by host of symbiont cells;extracellular region;membrane;lipid metabolic process;high-density lipoprotein particle;endoplasmic reticulum me…	K14480	-	-	apolipoprotein L3 isoform 1 [Homo sapiens]	PF05461.15	Apolipoprotein L	Apolipoprotein L3 OS=Homo sapiens OX=9606 GN=APOL3 PE=1 SV=3	4MU7M	U	Apolipoprotein L	-	-	-	-	-	-	-	-	-	row-306
transcript:ENST00000490078	transcript:ENST00000490078	1.13185	-9.87712	7.40179e-25	3.72964e-23	down	0	3.80218	0	132	GO:0005576;GO:0005615;GO:0005829;GO:0061617;GO:0005743;GO:0140275;GO:0000139;GO:0005739;GO:0001401;GO:0031093;GO:0007007;GO:0034362;GO:0034364;GO:0005789;GO:0042407;GO:0006869;GO:0044284;GO:0034361;	CC;CC;CC;CC;CC;CC;CC;CC;CC;CC;BP;CC;CC;CC;BP;BP;CC;CC;	extracellular region;extracellular space;cytosol;MICOS complex;mitochondrial inner membrane;MIB complex;Golgi membrane;mitochondrion;SAM complex;platelet alpha granule lumen;inner mitochondrial membrane organization;low-density lipoprotein particle;high-density lipoprotein particle;endoplasmic reticulum membrane;cristae formation;lipid transport;mitochondrial crista junction;very-low-density lipo…	K24625	-	-	PREDICTED: apolipoprotein O isoform X2 [Cercocebus atys]	PF09769.13	Apolipoprotein O	MICOS complex subunit MIC26 OS=Homo sapiens OX=9606 GN=APOO PE=1 SV=1	4MX8S	S	Component of the MICOS complex, a large protein complex of the mitochondrial inner membrane that plays crucial roles in the maintenance of crista junctions, inner membrane architecture, and formation of contact sites to the outer membrane	-	-	-	-	KOG4798	[S]	Function unknown;	Uncharacterized conserved protein	-	row-307
transcript:ENST00000533482	transcript:ENST00000533482	0.420861	-9.87712	7.40179e-25	3.72964e-23	down	0	0.792189	0	132	GO:0032508;GO:0007346;GO:0000781;GO:0006281;GO:0003690;GO:0005654;GO:0007507;GO:1904354;GO:0051321;GO:0006284;GO:0005739;GO:0046872;GO:0006312;GO:0003677;GO:0016233;GO:0044752;GO:0043047;GO:0051276;GO:0000724;GO:0004017;GO:0048471;GO:0044877;GO:0031860;GO:0045027;GO:0006974;GO:0097552;GO:0120290;GO:0000019;GO:0098687;GO:0000794;GO:0033674;GO:0016234;GO:0006303;GO:0042138;GO:1990918;GO:0031573;GO:…	BP;BP;CC;BP;MF;CC;BP;BP;BP;BP;CC;MF;BP;MF;BP;BP;MF;BP;BP;MF;CC;MF;BP;MF;BP;BP;BP;BP;CC;CC;BP;CC;BP;BP;BP;BP;CC;BP;CC;BP;MF;CC;BP;MF;MF;CC;BP;BP;BP;MF;MF;CC;MF;MF;MF;BP;BP;CC;CC;BP;BP;BP;CC;BP;BP;BP;MF;BP;CC;BP;BP;BP;BP;BP;BP;BP;BP;	DNA duplex unwinding;regulation of mitotic cell cycle;chromosome, telomeric region;DNA repair;double-stranded DNA binding;nucleoplasm;heart development;negative regulation of telomere capping;meiotic cell cycle;base-excision repair;mitochondrion;metal ion binding;mitotic recombination;DNA binding;telomere capping;response to human chorionic gonadotropin;single-stranded telomeric DNA binding;chrom…	K10866	ko03440;ko04218;ko03450	Homologous recombination;Cellular senescence;Non-homologous end-joining	PREDICTED: DNA repair protein RAD50-like [Cercocebus atys]	PF13476.10	AAA domain	DNA repair protein RAD50 OS=Homo sapiens OX=9606 GN=RAD50 PE=1 SV=1	4PZKS	L	DNA repair protein RAD50	COG3950	Predicted ATP-binding protein involved in virulence	R	General function prediction only	KOG0962	[L]	Replication, recombination and repair;	DNA repair protein RAD50, ABC-type ATPase/SMC superfamily	-	row-308
gene:ENSG00000248919	ATP5J2-PTCD1	0.746699	-5.36208	1.25192e-24	6.28787e-23	down	0.028426	1.73769	3	164	GO:0000276;GO:0000049;GO:0005743;GO:0005739;GO:0005783;GO:0005753;GO:0005794;GO:0006754;GO:0048255;GO:0009507;GO:0005759;GO:0045263;GO:0003723;GO:0015986;GO:0042776;GO:0046933;GO:0004016;GO:0003729;GO:1902600;GO:0042780;GO:0032543;GO:0031965;	CC;MF;CC;CC;CC;CC;CC;BP;BP;CC;CC;CC;MF;BP;BP;MF;MF;MF;BP;BP;BP;CC;	obsolete mitochondrial proton-transporting ATP synthase complex, coupling factor F(o);tRNA binding;mitochondrial inner membrane;mitochondrion;endoplasmic reticulum;obsolete mitochondrial proton-transporting ATP synthase complex;Golgi apparatus;ATP biosynthetic process;mRNA stabilization;chloroplast;mitochondrial matrix;proton-transporting ATP synthase complex, coupling factor F(o);RNA binding;pro…	K17710	-	-	ATP5J2-PTCD1 fusion protein [Homo sapiens]	PF13041.10	PPR repeat family	Pentatricopeptide repeat-containing protein 1, mitochondrial OS=Homo sapiens OX=9606 GN=PTCD1 PE=1 SV=2	4MSY4	S	tRNA 3'-end processing	-	-	-	-	KOG4196	[K]	Transcription;	bZIP transcription factor MafK	-	row-309
transcript:ENST00000555148	transcript:ENST00000555148	2.40918	-2.56515	1.35953e-24	6.80637e-23	down	1.64486	9.66761	113	859	GO:0006893;GO:0031267;GO:0090148;GO:0006892;GO:1905515;GO:0005829;GO:0001736;GO:0000145;GO:0006887;GO:0015031;GO:0000281;GO:0030496;GO:0072659;GO:0090522;GO:0005737;GO:1904019;GO:0006904;	BP;MF;BP;BP;BP;CC;BP;CC;BP;BP;BP;CC;BP;BP;CC;BP;BP;	Golgi to plasma membrane transport;small GTPase binding;membrane fission;post-Golgi vesicle-mediated transport;non-motile cilium assembly;cytosol;establishment of planar polarity;exocyst;exocytosis;protein transport;mitotic cytokinesis;midbody;protein localization to plasma membrane;vesicle tethering involved in exocytosis;cytoplasm;epithelial cell apoptotic process;vesicle docking involved in ex…	K19984	-	-	exocyst complex component 5 isoform X4 [Mus musculus]	-	-	Exocyst complex component 5 OS=Rattus norvegicus OX=10116 GN=Exoc5 PE=1 SV=1	4PSWF	U	Exocyst complex component 5	-	-	-	-	KOG3745	[U]	Intracellular trafficking, secretion, and vesicular transport;	Exocyst subunit - Sec10p	-	row-310
MSTRG.8866.5	MSTRG.8866.5	0.840294	9.80754	1.97858e-24	9.87389e-23	up	2.20559	0	98	0	-	-	-	-	-	-	-	-	-	-	-	-	-	-	-	-	-	-	-	-	-	-	row-311
transcript:ENST00000574723	transcript:ENST00000574723	1.59448	-9.84399	2.27163e-24	1.12641e-22	down	0	8.11953	0	129	GO:0070062;GO:0043009;GO:0098793;GO:0005654;GO:0005730;GO:0005739;GO:0032040;GO:0006412;GO:0042274;GO:0022627;GO:0022626;GO:0005840;GO:0009506;GO:0002181;GO:0005737;GO:0042788;GO:0003723;GO:0010494;GO:0030218;GO:0031012;GO:0005634;GO:0045787;GO:0098794;GO:1990904;GO:0016020;GO:0019843;GO:0045202;GO:0009615;GO:0140242;GO:0000325;GO:0008284;GO:0003735;GO:0005829;GO:0007420;GO:0009505;GO:0051726;GO:…	CC;BP;CC;CC;CC;CC;CC;BP;BP;CC;CC;CC;CC;BP;CC;CC;MF;CC;BP;CC;CC;BP;CC;CC;CC;MF;CC;BP;BP;CC;BP;MF;CC;BP;CC;BP;BP;	extracellular exosome;chordate embryonic development;presynapse;nucleoplasm;nucleolus;mitochondrion;small-subunit processome;translation;ribosomal small subunit biogenesis;cytosolic small ribosomal subunit;cytosolic ribosome;ribosome;plasmodesma;cytoplasmic translation;cytoplasm;obsolete polysomal ribosome;RNA binding;cytoplasmic stress granule;erythrocyte differentiation;extracellular matrix;nuc…	K02957	ko03010	Ribosome	40S ribosomal protein S15a-like [Nyctereutes procyonoides]	PF00410.23	Ribosomal protein S8	Small ribosomal subunit protein uS8 OS=Pongo abelii OX=9601 GN=RPS15A PE=2 SV=1	4MREH	J	structural constituent of ribosome	COG0096	Ribosomal protein S8	J	Translation, ribosomal structure and biogenesis	KOG1754	[J]	Translation, ribosomal structure and biogenesis;	40S ribosomal protein S15/S22	-	row-312
transcript:ENST00000413704	transcript:ENST00000413704	0.5325	5.42478	2.27163e-24	1.12641e-22	up	1.05588	0.017651	105	3	GO:0000165;GO:0008542;GO:0003714;GO:0042119;GO:0044665;GO:0048599;GO:0140947;GO:0045944;GO:0019899;GO:0050890;GO:0046975;GO:0005700;GO:0035162;GO:0106363;GO:0032922;GO:0160021;GO:0030317;GO:0061038;GO:0006325;GO:0140999;GO:0006366;GO:0003700;GO:0005634;GO:0035035;GO:0035640;GO:0002674;GO:0010628;GO:0140949;GO:0016604;GO:0003713;GO:1902275;GO:0140945;GO:0090310;GO:0065003;GO:0005923;GO:0035064;GO:…	BP;BP;MF;BP;CC;BP;MF;BP;MF;BP;MF;CC;BP;MF;BP;BP;BP;BP;BP;MF;BP;MF;CC;MF;BP;BP;BP;MF;CC;MF;BP;MF;BP;BP;CC;MF;CC;MF;BP;BP;BP;MF;BP;MF;BP;BP;BP;CC;BP;BP;BP;MF;CC;CC;MF;MF;MF;BP;MF;BP;CC;BP;BP;BP;BP;BP;BP;CC;BP;BP;BP;BP;MF;BP;BP;BP;MF;CC;CC;CC;MF;MF;MF;BP;BP;BP;CC;CC;BP;CC;CC;BP;BP;BP;CC;BP;CC;MF;MF;MF;CC;BP;CC;BP;BP;BP;BP;BP;MF;BP;BP;BP;MF;CC;BP;MF;BP;BP;BP;BP;BP;BP;BP;BP;BP;CC;BP;	MAPK cascade;visual learning;transcription corepressor activity;neutrophil activation;MLL1/2 complex;oocyte development;histone H3K9me2 methyltransferase activity;positive regulation of transcription by RNA polymerase II;enzyme binding;cognition;histone H3K36 methyltransferase activity;polytene chromosome;embryonic hemopoiesis;protein-cysteine methyltransferase activity;circadian regulation of ge…	K23216	-	-	histone-lysine N-methyltransferase SETD5 isoform X14 [Pongo pygmaeus]	PF00856.32	SET domain	Histone-lysine N-methyltransferase SETD5 OS=Homo sapiens OX=9606 GN=SETD5 PE=1 SV=2	4MWVN	K	SET (Su(var)3-9, Enhancer-of-zeste, Trithorax) domain	-	-	-	-	KOG1844	[R]	General function prediction only;	PHD Zn-finger proteins	-	row-313
transcript:ENST00000522136	transcript:ENST00000522136	1.24068	3.54388	2.60766e-24	1.28893e-22	up	3.3704	0.277731	192	21	GO:0004674;GO:0106310;GO:0016310;GO:0004713;GO:0005524;GO:0043484;GO:0004715;GO:0004712;GO:0005634;	MF;MF;BP;MF;MF;BP;MF;MF;CC;	protein serine/threonine kinase activity;protein serine kinase activity;phosphorylation;protein tyrosine kinase activity;ATP binding;regulation of RNA splicing;non-membrane spanning protein tyrosine kinase activity;protein serine/threonine/tyrosine kinase activity;nucleus;	K23561	-	-	dual specificity protein kinase CLK4 isoform X4 [Mustela putorius furo]	-	-	Dual specificity protein kinase CLK4 OS=Homo sapiens OX=9606 GN=CLK4 PE=1 SV=1	4N17N	T	Belongs to the protein kinase superfamily	-	-	-	-	KOG0671	[T]	Signal transduction mechanisms;	LAMMER dual specificity kinases	-	row-314
gene:ENSG00000131051	RBM39	5.06658	2.20253	2.82374e-24	1.39132e-22	up	65.9724	15.7683	4555	1270	GO:0006357;GO:0005681;GO:0015030;GO:2000767;GO:0030514;GO:1990841;GO:0009631;GO:0006412;GO:0009651;GO:0048599;GO:0045314;GO:0043023;GO:0016233;GO:0001893;GO:0043047;GO:0045296;GO:0005840;GO:0031047;GO:0001651;GO:0106002;GO:0006998;GO:0051168;GO:0061752;GO:0140517;GO:0035332;GO:0009579;GO:0005844;GO:0000184;GO:0097165;GO:0001558;GO:0005634;GO:0031370;GO:0006446;GO:0032211;GO:0017148;GO:0000398;GO:…	BP;CC;CC;BP;BP;MF;BP;BP;BP;BP;BP;MF;BP;BP;MF;MF;CC;BP;CC;CC;BP;BP;MF;MF;BP;CC;CC;BP;CC;BP;CC;MF;BP;BP;BP;BP;CC;BP;CC;MF;CC;CC;BP;BP;BP;BP;CC;MF;BP;BP;BP;BP;MF;MF;BP;CC;CC;BP;CC;MF;CC;BP;BP;MF;MF;CC;BP;CC;BP;MF;CC;BP;MF;CC;BP;BP;BP;CC;MF;CC;BP;MF;BP;CC;MF;CC;MF;CC;CC;BP;CC;BP;MF;MF;BP;CC;CC;BP;BP;BP;CC;CC;BP;BP;CC;BP;BP;MF;BP;BP;CC;CC;BP;BP;BP;BP;BP;MF;BP;BP;CC;BP;CC;BP;CC;BP;CC;CC;BP;BP;MF;CC;CC;…	regulation of transcription by RNA polymerase II;spliceosomal complex;Cajal body;positive regulation of cytoplasmic translation;negative regulation of BMP signaling pathway;promoter-specific chromatin binding;cold acclimation;translation;response to salt stress;oocyte development;regulation of compound eye photoreceptor development;ribosomal large subunit binding;telomere capping;maternal placent…	K13091	-	-	RNA-binding protein 39 isoform X1 [Vulpes vulpes]	PF00076.26	RNA recognition motif	RNA-binding protein 39 OS=Homo sapiens OX=9606 GN=RBM39 PE=1 SV=2	493TA	A	RNA binding motif protein	COG0724	RNA recognition motif (RRM) domain	J	Translation, ribosomal structure and biogenesis	KOG0147	[K]	Transcription;	Transcriptional coactivator CAPER (RRM superfamily)	-	row-315
gene:ENSG00000103257	SLC7A5	4.9778	2.18575	2.86085e-24	1.40516e-22	up	64.9801	14.0495	8547	2411	GO:0000102;GO:0050804;GO:0140926;GO:0008542;GO:0015816;GO:0071702;GO:1900407;GO:0097440;GO:0015811;GO:0060252;GO:0140206;GO:0048286;GO:0015190;GO:0110076;GO:1905460;GO:0009624;GO:0015180;GO:0016020;GO:1904273;GO:0046982;GO:0009986;GO:1905534;GO:0140924;GO:0015823;GO:0080144;GO:0000101;GO:0032328;GO:0097421;GO:0065003;GO:0050807;GO:0060173;GO:0015179;GO:1902475;GO:0015194;GO:0006865;GO:0060094;GO:…	MF;BP;MF;BP;BP;BP;BP;CC;BP;BP;BP;BP;MF;BP;BP;BP;MF;CC;BP;MF;CC;BP;BP;BP;BP;BP;BP;BP;BP;BP;BP;MF;BP;MF;BP;BP;CC;BP;CC;BP;CC;BP;CC;MF;CC;MF;MF;BP;MF;BP;BP;CC;BP;BP;BP;BP;BP;BP;MF;BP;BP;BP;BP;BP;BP;BP;CC;CC;MF;BP;BP;CC;BP;CC;BP;BP;BP;BP;MF;BP;CC;BP;BP;BP;BP;CC;BP;BP;MF;BP;BP;MF;CC;CC;BP;MF;CC;CC;BP;CC;BP;MF;BP;BP;BP;MF;BP;BP;BP;BP;MF;BP;CC;BP;MF;CC;CC;BP;BP;BP;BP;BP;MF;BP;BP;BP;CC;MF;BP;BP;BP;BP;BP;…	L-methionine secondary active transmembrane transporter activity;modulation of chemical synaptic transmission;L-kynurenine transmembrane transporter activity;visual learning;glycine transport;obsolete organic substance transport;regulation of cellular response to oxidative stress;apical dendrite;L-cystine transport;positive regulation of glial cell proliferation;dipeptide import across plasma mem…	K13780	ko04150;ko05230	mTOR signaling pathway;Central carbon metabolism in cancer	large neutral amino acids transporter small subunit 1 [Homo sapiens]	PF13520.10	Amino acid permease	Large neutral amino acids transporter small subunit 1 OS=Homo sapiens OX=9606 GN=SLC7A5 PE=1 SV=2	4MTRK	P	Solute carrier family 7 (amino acid transporter light chain, L system), member 5	COG0531	Serine transporter YbeC, amino acid:H+ symporter family	E	Amino acid transport and metabolism	KOG1287	[E]	Amino acid transport and metabolism;	Amino acid transporters	-	row-316
transcript:ENST00000357884	transcript:ENST00000357884	0.767699	-9.83277	3.31047e-24	1.62088e-22	down	0	1.89868	0	128	GO:0005654;GO:0005634;GO:0007165;	CC;CC;BP;	nucleoplasm;nucleus;signal transduction;	-	-	-	uncharacterized protein C19orf47 homolog isoform X4 [Macaca nemestrina]	PF18017.5	SAM domain (Sterile alpha motif)	Uncharacterized protein C19orf47 OS=Homo sapiens OX=9606 GN=C19orf47 PE=1 SV=1	4M670	S	Chromosome 19 open reading frame 47	-	-	-	-	KOG3930	[S]	Function unknown;	Uncharacterized conserved protein	-	row-317
transcript:ENST00000575784	transcript:ENST00000575784	1.48502	4.86983	3.82104e-24	1.865e-22	up	5.79785	0.152662	117	5	GO:0003676;GO:0005634;	MF;CC;	nucleic acid binding;nucleus;	-	-	-	sperm-associated antigen 7 isoform X2 [Mustela erminea]	PF01424.26	R3H domain	Sperm-associated antigen 7 OS=Homo sapiens OX=9606 GN=SPAG7 PE=1 SV=2	4M9QW	K	Sperm associated antigen 7	-	-	-	-	-	-	-	-	-	row-318
gene:ENSG00000149809	TM7SF2	0.999097	4.53645	4.57055e-24	2.22386e-22	up	2.63567	0.098833	129	7	GO:0000246;GO:0005640;GO:0005652;GO:0005521;GO:0006695;GO:0070402;GO:0030223;GO:0005783;GO:0003677;GO:0016132;GO:0045540;GO:0005794;GO:0005886;GO:0009826;GO:0001568;GO:0047598;GO:0005643;GO:0043235;GO:0016126;GO:0033489;GO:0050613;GO:0043231;GO:0005737;GO:0042127;GO:0003723;GO:0008139;GO:0005634;GO:0016628;GO:0050614;GO:0036180;GO:0016020;GO:0060487;GO:0030324;GO:0006997;GO:0003682;GO:0009918;GO:…	MF;CC;CC;MF;BP;MF;BP;CC;MF;BP;BP;CC;CC;BP;BP;MF;CC;CC;BP;BP;MF;CC;CC;BP;MF;MF;CC;MF;MF;BP;CC;BP;BP;BP;MF;MF;CC;CC;CC;BP;BP;MF;MF;CC;BP;BP;CC;MF;	delta24(24-1) sterol reductase activity;nuclear outer membrane;nuclear lamina;lamin binding;cholesterol biosynthetic process;NADPH binding;neutrophil differentiation;endoplasmic reticulum;DNA binding;brassinosteroid biosynthetic process;regulation of cholesterol biosynthetic process;Golgi apparatus;plasma membrane;unidimensional cell growth;blood vessel development;7-dehydrocholesterol reductase …	K00222	ko01100;ko00100	Metabolic pathways;Steroid biosynthesis	delta(14)-sterol reductase TM7SF2 isoform 1 [Homo sapiens]	PF01222.21	Ergosterol biosynthesis ERG4/ERG24 family	Delta(14)-sterol reductase TM7SF2 OS=Homo sapiens OX=9606 GN=TM7SF2 PE=1 SV=3	4MSG9	I	Ergosterol biosynthesis ERG4/ERG24 family	COG2020	Protein-S-isoprenylcysteine O-methyltransferase Ste14	O	Posttranslational modification, protein turnover, chaperones	KOG1435	[IT]	Lipid transport and metabolism; Signal transduction mechanisms;	Sterol reductase/lamin B receptor	-	row-319
transcript:ENST00000393650	transcript:ENST00000393650	0.657785	-9.82147	4.83124e-24	2.32887e-22	down	0	1.48901	0	127	GO:0070062;GO:0005654;GO:0061824;GO:0005814;GO:0005516;GO:0019899;GO:0060271;GO:0048496;GO:0001750;GO:0015630;GO:0005737;GO:0032391;GO:0030674;GO:0062063;GO:0045494;GO:0005813;GO:0005929;GO:0005829;GO:0072686;GO:0045171;	CC;CC;BP;CC;MF;MF;BP;BP;CC;CC;CC;CC;MF;MF;BP;CC;CC;CC;CC;CC;	extracellular exosome;nucleoplasm;cytosolic ciliogenesis;centriole;calmodulin binding;enzyme binding;cilium assembly;maintenance of animal organ identity;photoreceptor outer segment;microtubule cytoskeleton;cytoplasm;photoreceptor connecting cilium;protein-macromolecule adaptor activity;BBSome binding;photoreceptor cell maintenance;centrosome;cilium;cytosol;mitotic spindle;intercellular bridge;	K16774	-	-	IQ calmodulin-binding motif-containing protein 1 isoform X5 [Homo sapiens]	PF12422.12	Condensin II non structural maintenance of chromosomes subunit	IQ calmodulin-binding motif-containing protein 1 OS=Homo sapiens OX=9606 GN=IQCB1 PE=1 SV=1	4MVX6	Z	Short calmodulin-binding motif containing conserved Ile and Gln residues.	-	-	-	-	KOG0160	[Z]	Cytoskeleton;	Myosin class V heavy chain	-	row-320
transcript:ENST00000600619	transcript:ENST00000600619	0.574606	-9.82147	4.83124e-24	2.32887e-22	down	0	1.21793	0	127	GO:0006357;GO:0002437;GO:0001933;GO:0006383;GO:0005654;GO:0001817;GO:0005730;GO:1990841;GO:0001525;GO:0045893;GO:0008270;GO:0046872;GO:0002829;GO:0003677;GO:0072707;GO:0007049;GO:0001228;GO:0043565;GO:0010526;GO:0045944;GO:0051781;GO:0045648;GO:0061052;GO:1990837;GO:0033674;GO:0022604;GO:0006355;GO:0006325;GO:0001217;GO:0003700;GO:0001227;GO:0006366;GO:0005634;GO:0007010;GO:0030154;GO:0000981;GO:…	BP;BP;BP;BP;CC;BP;CC;MF;BP;BP;MF;MF;BP;MF;BP;BP;MF;MF;BP;BP;BP;BP;BP;MF;BP;BP;BP;BP;MF;MF;MF;BP;CC;BP;BP;MF;BP;BP;BP;BP;BP;MF;CC;MF;CC;BP;BP;BP;BP;BP;BP;BP;BP;BP;MF;BP;MF;BP;BP;BP;BP;BP;BP;BP;	regulation of transcription by RNA polymerase II;inflammatory response to antigenic stimulus;negative regulation of protein phosphorylation;transcription by RNA polymerase III;nucleoplasm;regulation of cytokine production;nucleolus;promoter-specific chromatin binding;angiogenesis;positive regulation of DNA-templated transcription;zinc ion binding;metal ion binding;negative regulation of type 2 im…	K09228	ko05168	Herpes simplex virus 1 infection	zinc finger protein 530 isoform 1 [Homo sapiens]	PF13465.10	Zinc-finger double domain	Zinc finger protein 530 OS=Homo sapiens OX=9606 GN=ZNF530 PE=2 SV=2	4N82C	K	krueppel associated box	-	-	-	-	KOG1720	[V]	Defense mechanisms;	Protein tyrosine phosphatase CDC14	zf-C2H2	row-321
transcript:ENST00000498133	transcript:ENST00000498133	0.586442	-9.82147	4.83124e-24	2.32887e-22	down	0	1.25462	0	127	GO:0016020;GO:0008656;GO:0031966;GO:0005739;GO:0006919;GO:0042981;GO:0005634;GO:0006915;	CC;MF;CC;CC;BP;BP;CC;BP;	membrane;cysteine-type endopeptidase activator activity involved in apoptotic process;mitochondrial membrane;mitochondrion;activation of cysteine-type endopeptidase activity involved in apoptotic process;regulation of apoptotic process;nucleus;apoptotic process;	K15485	ko04137;ko05134	Mitophagy - animal;Legionellosis	bcl-2-like protein 13 isoform X10 [Homo sapiens]	-	-	Bcl-2-like protein 13 OS=Homo sapiens OX=9606 GN=BCL2L13 PE=1 SV=1	4IWUW	S	Bcl-2-like protein 13	-	-	-	-	-	-	-	-	-	row-322
gene:ENSG00000088827	SIGLEC1	0.554994	3.56024	4.99981e-24	2.40269e-22	up	0.990767	0.084224	185	20	GO:0045924;GO:0072583;GO:0044295;GO:0032809;GO:0019722;GO:0021522;GO:0072659;GO:0097090;GO:0010765;GO:0045296;GO:0030275;GO:0002638;GO:0098631;GO:0016339;GO:0016020;GO:0031430;GO:0031433;GO:0030424;GO:0090179;GO:2000811;GO:0005768;GO:0106015;GO:0044294;GO:0019904;GO:0001618;GO:0005547;GO:0071241;GO:0060419;GO:0010467;GO:0043195;GO:0007399;GO:0005796;GO:0014823;GO:0035584;GO:0030913;GO:0007411;GO:…	BP;BP;CC;CC;BP;BP;BP;BP;BP;MF;MF;BP;MF;BP;CC;CC;MF;CC;BP;BP;CC;BP;CC;MF;MF;MF;BP;BP;BP;CC;BP;CC;BP;BP;BP;BP;BP;BP;BP;CC;BP;BP;MF;BP;BP;BP;BP;BP;BP;BP;CC;CC;BP;BP;BP;BP;CC;BP;BP;BP;BP;BP;CC;BP;MF;BP;MF;CC;BP;BP;MF;MF;CC;BP;BP;BP;BP;MF;BP;MF;BP;BP;BP;BP;BP;BP;BP;BP;CC;BP;BP;MF;BP;BP;BP;CC;MF;CC;MF;BP;BP;MF;BP;BP;MF;MF;BP;BP;BP;BP;CC;MF;MF;BP;MF;BP;MF;BP;BP;CC;BP;MF;BP;BP;BP;CC;CC;MF;CC;MF;MF;BP;BP;…	regulation of female receptivity;clathrin-dependent endocytosis;axonal growth cone;neuronal cell body membrane;calcium-mediated signaling;spinal cord motor neuron differentiation;protein localization to plasma membrane;presynaptic membrane organization;positive regulation of sodium ion transport;cadherin binding;LRR domain binding;negative regulation of immunoglobulin production;cell adhesion med…	K06548	ko04514	Cell adhesion molecules	sialoadhesin isoform 1 precursor [Homo sapiens]	PF13927.10	Immunoglobulin domain	Sialoadhesin OS=Homo sapiens OX=9606 GN=SIGLEC1 PE=1 SV=2	4N69Q	T	Sialic acid binding Ig-like lectin 1, sialoadhesin	COG5184	Alpha-tubulin suppressor ATS1 and related RCC1 domain-containing proteins	DZ	-	KOG4474	[S]	Function unknown;	Uncharacterized conserved protein	-	row-323
gene:ENSG00000138642	HERC6	3.72293	2.22671	5.25521e-24	2.51765e-22	up	26.0233	5.45189	2845	780	GO:0072659;GO:0000278;GO:0010765;GO:0040008;GO:0032020;GO:0009881;GO:0003254;GO:0006974;GO:0032981;GO:0005771;GO:0008361;GO:0048514;GO:0039585;GO:0016020;GO:0030424;GO:0051865;GO:0070064;GO:0044389;GO:0021702;GO:0019904;GO:0019220;GO:0000151;GO:1901380;GO:0061736;GO:0032511;GO:0000472;GO:0043231;GO:0036126;GO:0031966;GO:0001750;GO:0008017;GO:2000650;GO:0051285;GO:0043021;GO:0032391;GO:0001947;GO:…	BP;BP;BP;BP;BP;MF;BP;BP;BP;CC;BP;BP;BP;CC;CC;BP;MF;MF;BP;MF;BP;CC;BP;BP;BP;BP;CC;CC;CC;CC;MF;BP;CC;MF;CC;BP;BP;BP;BP;BP;BP;BP;BP;BP;MF;BP;CC;CC;BP;CC;BP;BP;BP;CC;BP;BP;BP;BP;BP;BP;BP;CC;MF;BP;BP;BP;MF;CC;BP;BP;BP;BP;CC;BP;MF;BP;MF;BP;BP;MF;BP;BP;CC;MF;BP;BP;BP;BP;BP;BP;BP;BP;BP;BP;BP;BP;BP;CC;BP;BP;BP;BP;CC;BP;BP;CC;BP;CC;BP;MF;BP;MF;BP;BP;BP;BP;BP;CC;BP;MF;BP;MF;BP;BP;BP;BP;MF;MF;BP;MF;BP;CC;BP;…	protein localization to plasma membrane;mitotic cell cycle;positive regulation of sodium ion transport;regulation of growth;ISG15-protein conjugation;photoreceptor activity;regulation of membrane depolarization;DNA damage response;mitochondrial respiratory chain complex I assembly;multivesicular body;regulation of cell size;blood vessel morphogenesis;PKR/eIFalpha signaling;membrane;axon;protein a…	K22372	-	-	probable E3 ubiquitin-protein ligase HERC6 isoform 1 [Homo sapiens]	PF00632.29	HECT-domain (ubiquitin-transferase)	Probable E3 ubiquitin-protein ligase HERC6 OS=Homo sapiens OX=9606 GN=HERC6 PE=1 SV=2	4MVV4	O	Domain Homologous to E6-AP Carboxyl Terminus with	COG5184	Alpha-tubulin suppressor ATS1 and related RCC1 domain-containing proteins	DZ	-	KOG0941	[O]	Posttranslational modification, protein turnover, chaperones;	E3 ubiquitin protein ligase	-	row-324
transcript:ENST00000444666	transcript:ENST00000444666	1.40357	5.93604	7.0607e-24	3.37224e-22	up	5.67117	0.049138	102	2	GO:0046983;GO:0070062;GO:0006418;GO:0070150;GO:0004820;GO:0005829;GO:0030424;GO:0005524;GO:0005739;GO:0030141;GO:0042802;GO:0016740;GO:0005737;GO:0006426;GO:0004081;GO:0015966;GO:0005759;	MF;CC;BP;BP;MF;CC;CC;MF;CC;CC;MF;MF;CC;BP;MF;BP;CC;	protein dimerization activity;extracellular exosome;tRNA aminoacylation for protein translation;mitochondrial glycyl-tRNA aminoacylation;glycine-tRNA ligase activity;cytosol;axon;ATP binding;mitochondrion;secretory granule;identical protein binding;transferase activity;cytoplasm;glycyl-tRNA aminoacylation;bis(5'-nucleosyl)-tetraphosphatase (asymmetrical) activity;diadenosine tetraphosphate biosyn…	K01880	ko00970	Aminoacyl-tRNA biosynthesis	glycine--tRNA ligase isoform 2 [Homo sapiens]	PF19302.3	Domain of unknown function (DUF5915)	Glycine--tRNA ligase OS=Homo sapiens OX=9606 GN=GARS1 PE=1 SV=3	4MXSG	J	glycyl-tRNA synthetase	-	-	-	-	KOG2298	[J]	Translation, ribosomal structure and biogenesis;	Glycyl-tRNA synthetase and related class II tRNA synthetase	-	row-325
transcript:ENST00000610164	transcript:ENST00000610164	0.41671	9.74748	9.72623e-24	4.63111e-22	up	0.781904	0	94	0	GO:0008542;GO:0019722;GO:0042119;GO:0004983;GO:2000252;GO:0009881;GO:0048023;GO:0002690;GO:0048149;GO:0055117;GO:0040013;GO:0042593;GO:0048598;GO:0016020;GO:0030424;GO:0005503;GO:0007217;GO:0019221;GO:0043065;GO:0001602;GO:0043176;GO:0016545;GO:0004966;GO:1901857;GO:0048545;GO:0016546;GO:0099634;GO:0035811;GO:0019957;GO:0005502;GO:0043005;GO:0043231;GO:0007623;GO:0001750;GO:0060857;GO:0033365;GO:…	BP;BP;BP;MF;BP;MF;BP;BP;BP;BP;BP;BP;BP;CC;CC;MF;BP;BP;BP;MF;MF;BP;MF;BP;BP;BP;CC;BP;MF;MF;CC;CC;BP;CC;BP;BP;BP;BP;BP;BP;BP;MF;BP;BP;BP;BP;BP;MF;BP;BP;CC;CC;BP;BP;BP;MF;BP;BP;BP;CC;CC;BP;BP;MF;BP;BP;BP;BP;BP;BP;BP;BP;CC;MF;BP;BP;MF;BP;BP;MF;BP;MF;BP;BP;BP;BP;BP;BP;MF;BP;CC;BP;BP;BP;BP;BP;BP;BP;BP;BP;CC;BP;BP;BP;BP;BP;BP;BP;BP;BP;BP;CC;BP;BP;BP;CC;BP;CC;CC;BP;CC;BP;MF;CC;BP;BP;BP;CC;BP;MF;BP;MF;BP;…	visual learning;calcium-mediated signaling;neutrophil activation;neuropeptide Y receptor activity;negative regulation of feeding behavior;photoreceptor activity;positive regulation of melanin biosynthetic process;positive regulation of leukocyte chemotaxis;behavioral response to ethanol;regulation of cardiac muscle contraction;negative regulation of locomotion;glucose homeostasis;embryonic morpho…	K04302	-	-	probable G-protein coupled receptor 85 [Vulpes vulpes]	PF00001.25	7 transmembrane receptor (rhodopsin family)	Probable G-protein coupled receptor 85 OS=Rattus norvegicus OX=10116 GN=Gpr85 PE=2 SV=1	491BG	S	G-protein coupled receptor activity	-	-	-	-	KOG3655	[Z]	Cytoskeleton;	Drebrins and related actin binding proteins	-	row-326
gene:ENSG00000196497	IPO4	3.59708	2.22713	9.98052e-24	4.7377e-22	up	22.2882	5.28814	2357	646	GO:0005654;GO:0005730;GO:0002753;GO:0005095;GO:0005794;GO:2000220;GO:0051028;GO:0005643;GO:0005525;GO:0071230;GO:0005737;GO:0003723;GO:0008139;GO:0005634;GO:0034504;GO:0016020;GO:0045202;GO:0061608;GO:0032991;GO:0006607;GO:0045736;GO:0000785;GO:0034399;GO:0042307;GO:0031267;GO:0005829;GO:0005635;GO:0006610;GO:0042254;GO:0031965;GO:0010494;GO:0006606;	CC;CC;BP;MF;CC;BP;BP;CC;MF;BP;CC;MF;MF;CC;BP;CC;CC;MF;CC;BP;BP;CC;CC;BP;MF;CC;CC;BP;BP;CC;CC;BP;	nucleoplasm;nucleolus;cytoplasmic pattern recognition receptor signaling pathway;GTPase inhibitor activity;Golgi apparatus;regulation of pseudohyphal growth;mRNA transport;nuclear pore;GTP binding;cellular response to amino acid stimulus;cytoplasm;RNA binding;nuclear localization sequence binding;nucleus;protein localization to nucleus;membrane;synapse;nuclear import signal receptor activity;prot…	K20221	-	-	importin-4 [Homo sapiens]	PF13513.10	HEAT-like repeat	Importin-4 OS=Homo sapiens OX=9606 GN=IPO4 PE=1 SV=2	4N1C6	U	Importin-beta N-terminal domain	-	-	-	-	KOG2171	[YU]	Nuclear structure; Intracellular trafficking, secretion, and vesicular transport;	Karyopherin (importin) beta 3	-	row-327
gene:ENSG00000169429	CXCL8	7.79398	2.14515	1.0165e-23	4.81059e-22	up	467.74	104.078	22878	6638	GO:0045671;GO:0008083;GO:0035580;GO:0000165;GO:0019722;GO:0031623;GO:0042119;GO:0010765;GO:0007166;GO:0035556;GO:0045944;GO:0051781;GO:0070951;GO:0048020;GO:0008201;GO:2000535;GO:1904659;GO:0050729;GO:0097398;GO:0031091;GO:0031982;GO:0031735;GO:0071621;GO:0016004;GO:0051928;GO:0045236;GO:0030036;GO:0017134;GO:0010628;GO:0048245;GO:0031730;GO:0032642;GO:0019221;GO:0030335;GO:0071356;GO:2000545;GO:…	BP;MF;CC;BP;BP;BP;BP;BP;BP;BP;BP;BP;BP;MF;MF;BP;BP;BP;BP;CC;CC;MF;BP;MF;BP;MF;BP;MF;BP;BP;MF;BP;BP;BP;BP;BP;BP;BP;BP;BP;BP;BP;BP;BP;BP;BP;BP;BP;BP;BP;BP;BP;BP;BP;BP;BP;BP;BP;BP;BP;CC;BP;BP;BP;CC;BP;BP;MF;CC;BP;BP;BP;BP;BP;BP;CC;BP;BP;BP;BP;BP;BP;BP;BP;MF;MF;BP;BP;BP;BP;BP;MF;BP;BP;BP;MF;BP;BP;BP;BP;BP;BP;BP;MF;BP;BP;MF;BP;BP;BP;BP;BP;BP;BP;MF;BP;BP;BP;MF;BP;CC;BP;MF;BP;BP;MF;BP;MF;BP;BP;BP;BP;BP;…	negative regulation of osteoclast differentiation;growth factor activity;specific granule lumen;MAPK cascade;calcium-mediated signaling;receptor internalization;neutrophil activation;positive regulation of sodium ion transport;cell surface receptor signaling pathway;intracellular signal transduction;positive regulation of transcription by RNA polymerase II;positive regulation of cell division;reg…	K10030	ko04622;ko04932;ko04621;ko04620;ko04064;ko05135;ko05131;ko05142;ko05120;ko05132;ko04657;ko05164;ko05146;ko05163;ko04933;ko05144;ko04218;ko05161;ko05219;ko05200;ko04062;ko05202;ko05167;ko04061;ko05133;ko04072;ko05323;ko04060;ko05134	RIG-I-like receptor signaling pathway;Non-alcoholic fatty liver disease;NOD-like receptor signaling pathway;Toll-like receptor signaling pathway;NF-kappa B signaling pathway;Yersinia infection;Shigellosis;Chagas disease;Epithelial cell signaling in Helicobacter pylori infection;Salmonella infection;IL-17 signaling pathway;Influenza A;Amoebiasis;Human cytomegalovirus infection;AGE-RAGE signaling p…	interleukin-8 [Pan paniscus]	PF00048.24	Small cytokines (intecrine/chemokine), interleukin-8 like	Interleukin-8 OS=Homo sapiens OX=9606 GN=CXCL8 PE=1 SV=1	4N6YC	O	Small cytokines (intecrine/chemokine), interleukin-8 like	-	-	-	-	-	-	-	-	-	row-328
[truncated: 15,241 more rows]
